# Supplementary material for: Impairment of FBXO31-mediated Ubiquitination of OGT Upregulates O-GlcNAcylation to Advance Endometrial Malignancy
Source: Research Square preprint supplement (doi:10.21203/rs.3.rs-4019799/v1), 2024-04-12
Supplement: Supplementary file 1 [file 0a3105a0a897a7c51accb4a4.xlsx]

## Sheet: Sheet 1
Supplementary table 7. KEGG Pathway analysis on the 1038 top scoring genes
ID	Description	GeneRatio	BgRatio	pvalue	p.adjust	qvalue	geneID	Count
hsa04512	ECM-receptor interaction	11/360	88/8223	0.00150509	0.466578	0.466578	SPP1/COL9A3/DMP1/TNN/ITGAV/THBS3/SDC1/LAMA4/COL4A1/DAG1/ITGB6	11
hsa04714	Thermogenesis	19/360	232/8223	0.00627336	0.972371	0.972371	TSC2/NDUFAF7/PRKAA1/NDUFAF3/COA4/UCP1/NDUFA3/ACSL5/ADCY1/RPS6/SMARCB1/RHEB/COX18/NDUFB8/COX6B2/AKT1S1/NDUFAF6/NDUFB9/NDUFB4	19
hsa04080	Neuroactive ligand-receptor interaction	26/360	367/8223	0.0102347	0.982646	0.982646	OPRD1/PRLR/AGTR1/NTS/GLP1R/PTGER3/CCKBR/OPRL1/GRIN1/CHRNA3/GH1/CHRNG/GRM3/NPB/NR3C1/PTH2/GABRA2/CHRND/PGRMC1/ADRA2B/GABRA5/FPR2/TAC4/PTGER1/PRL/CHRNA9	26
hsa00340	Histidine metabolism	4/360	22/8223	0.0141305	0.982646	0.982646	FTCD/ALDH2/AMDHD1/UROC1	4
hsa05205	Proteoglycans in cancer	16/360	205/8223	0.0177336	0.982646	0.982646	PPP1R12A/VAV2/ITGAV/SMO/ITPR1/SDC1/WNT6/PLCG1/FZD6/RPS6/SRC/PTPN11/RAC1/WNT7B/HOXD10/WNT10A	16
hsa04151	PI3K-Akt signaling pathway	24/360	354/8223	0.0216436	0.982646	0.982646	SPP1/TSC2/COL9A3/PRLR/EFNA1/PRKAA1/TNN/ITGAV/THBS3/IL4/ATF4/LAMA4/GH1/COL4A1/RPS6/RHEB/ITGB6/FGF3/BCL2L1/RAC1/YWHAB/PRL/PPP2R1A/FGF8	24
hsa04950	Maturity onset diabetes of the young	4/360	26/8223	0.0251858	0.982646	0.982646	FOXA3/PKLR/HNF1B/PAX6	4
hsa04670	Leukocyte transendothelial migration	10/360	114/8223	0.0273871	0.982646	0.982646	THY1/ICAM1/VAV2/PLCG1/CTNNA1/RAPGEF3/PTPN11/RAC1/CLDN11/CLDN2	10
hsa00591	Linoleic acid metabolism	4/360	30/8223	0.0403024	0.982646	0.982646	ALOX15/PLA2G2A/PLA2G3/CYP2J2	4
hsa00511	Other glycan degradation	3/360	18/8223	0.0416606	0.982646	0.982646	FUCA2/AGA/NEU3	3
hsa05012	Parkinson disease	18/360	266/8223	0.0437279	0.982646	0.982646	LRRK2/UBC/NDUFA3/ATF4/ITPR1/EIF2S1/PSMC2/TUBB6/PLCG1/PSMB7/NDUFB8/BCL2L1/COX6B2/KLC1/NDUFB9/NDUFB4/CALML6/SLC25A5	18
hsa02010	ABC transporters	5/360	45/8223	0.04555	0.982646	0.982646	ABCC10/ABCB8/ABCA4/ABCG1/ABCC4	5
hsa04215	Apoptosis - multiple species	4/360	32/8223	0.049428	0.982646	0.982646	BCL2L1/BIRC5/XIAP/BIRC2	4
