# Supplementary material for: Impairment of FBXO31-mediated Ubiquitination of OGT Upregulates O-GlcNAcylation to Advance Endometrial Malignancy
Source: Research Square preprint supplement (doi:10.21203/rs.3.rs-4019799/v1), 2024-04-12
Supplement: Supplementary file 2 [file 101718bac4693351a9a04e59.xlsx]

## Sheet: Sheet1
Supplementary table 5. Cluster markers
Stem cells					O-GlcNAc related stem like cells					Ciliated cells					Proliferative cells					Pre-ciliated cells					Inflammatory cells
names	scores	logfoldchanges	pvals	pvals_adj	names	scores	logfoldchanges	pvals	pvals_adj	names	scores	logfoldchanges	pvals	pvals_adj	names	scores	logfoldchanges	pvals	pvals_adj	names	scores	logfoldchanges	pvals	pvals_adj	names	scores	logfoldchanges	pvals	pvals_adj
MT-CO1	82.2023	1.61941	0	0	MALAT1	30.3409	0.395874	3.31154e-202	3.73482e-201	TUBB4B	66.4642	3.32858	0	0	CDKN3	62.2071	7.15684	0	0	CFAP157	55.9062	8.31168	0	0	LCN2	22.5109	4.43337	3.24864e-112	9.74593e-109
MT-CO3	82.0835	2.53389	0	0	RPS3	16.428	-0.46048	1.20494e-60	5.93567e-60	TPPP3	59.2758	6.10002	0	0	MKI67	62.0746	7.56598	0	0	DNAAF1	54.3157	8.11448	0	0	KLK7	20.4661	7.34069	4.31406e-93	6.47109e-90
MT-ND4	73.9568	2.60917	0	0	EEF1A1	11.3254	-1.27672	9.82637e-30	3.65292e-29	HSP90AA1	50.731	1.5736	0	0	TOP2A	60.8417	7.2737	0	0	DYNLRB2	54.1778	7.82546	0	0	HSPB1	19.8893	3.16677	5.03461e-88	5.03461e-85
SEMA3B	73.7355	4.8328	0	0	RPLP1	5.45861	-0.401397	4.79882e-08	1.24645e-07	CAPS	50.5816	2.17217	0	0	STMN1	60.6692	5.6522	0	0	CFAP73	54.0655	7.97197	0	0	CRYAB	18.8338	9.66282	3.98988e-79	2.99241e-76
MSX1	72.3576	4.77796	0	0	PABPC1	5.27506	-1.7541	1.32714e-07	3.39133e-07	TUBA1A	50.0396	4.97334	0	0	PBK	60.2051	7.53423	0	0	EFCAB1	53.76	8.20707	0	0	TACSTD2	18.6359	3.23254	1.64413e-77	9.86479e-75
MT-ATP6	71.234	3.67361	0	0	MMP7	3.78646	-0.840658	0.00015281	0.000355924	DYNLL1	39.7276	1.48321	0	0	HMGB2	60.0177	5.85336	0	0	FAM81B	53.667	7.38976	0	0	SAA1	17.9084	4.28517	1.01385e-71	5.06927e-69
MT-CO2	69.873	3.19285	0	0	RPL13A	2.67058	-1.47294	0.00757198	0.0163828	RSPH1	39.2332	3.90794	0	0	TUBA1B	59.4136	3.96038	0	0	C4orf47	53.6557	7.39231	0	0	C15orf48	17.3938	8.51006	9.1918e-68	3.93934e-65
MT-CYB	69.3282	2.69095	0	0	AC244131.2	0.350904	1.42066	0.72566	0.999049	IGFBP7	37.7927	3.31161	0	0	TPX2	58.782	6.80239	0	0	ENKUR	53.6112	7.92214	0	0	PI3	16.8424	7.8677	1.19252e-63	4.47194e-61
TNFAIP2	68.3255	4.54221	0	0	AL109930.1	0.255999	1.29102	0.797951	0.999049	CALM1	31.8428	0.35312	1.65529e-222	3.67843e-221	CEP55	58.0691	7.07273	0	0	C1orf194	53.5613	8.21458	0	0	B2M	16.3397	1.3694	5.15075e-60	1.71692e-57
IL1R1	68.1666	4.32909	0	0	AP003783.1	0.225172	3.41848	0.821845	0.999049	C9orf24	31.1679	3.72626	2.90543e-213	6.01123e-212	CENPF	58.0073	6.88131	0	0	TEKT1	53.4384	7.99741	0	0	CLDN1	16.0233	4.23294	8.78248e-58	2.63474e-55
MDK	66.687	4.84309	0	0	AL390774.2	0.196538	2.299	0.844189	0.999049	C20orf85	30.6132	3.9131	8.15837e-206	1.6102e-204	SMC4	57.4572	5.60066	0	0	ZMYND10	53.2356	7.89558	0	0	KRT7	15.6894	2.68661	1.787e-55	4.87363e-53
SORL1	66.5635	4.37936	0	0	LARGE-AS1	0.108789	3.1716	0.91337	0.999049	FAM183A	27.5092	3.3116	1.36446e-166	2.02643e-165	H2AZ1	56.9659	3.56284	0	0	FAM183A	53.0964	8.18497	0	0	HLA-B	15.298	1.6805	7.8814e-53	1.97035e-50
STX18	66.5412	4.26702	0	0	AC093849.4	0.108279	2.38002	0.913774	0.999049	SNTN	26.3975	3.44394	1.46402e-153	1.96074e-152	PTTG1	56.7107	5.88765	0	0	CEP126	52.9663	7.50676	0	0	PDZK1IP1	14.6717	4.99445	9.77991e-49	2.2569e-46
HES4	65.961	4.65665	0	0	AC015923.1	0.10074	1.86546	0.919757	0.999049	PIFO	25.8467	2.89325	2.65155e-147	3.38496e-146	NDC80	55.9008	7.12257	0	0	MORN5	52.8619	7.93139	0	0	PERP	14.6458	2.6048	1.43303e-48	3.06097e-46
TMSB4X	65.7668	2.18584	0	0	AC011933.4	0.0937286	1.96301	0.925325	0.999049	C5orf49	24.8482	2.98363	2.70539e-136	3.27265e-135	UBE2S	55.4003	5.53968	0	0	C5orf49	52.8343	7.97428	0	0	FTL	14.6413	2.52965	1.53049e-48	3.06097e-46
LY6E	65.4903	4.74602	0	0	ANGPT2	0.0913184	1.30698	0.92724	0.999049	TAGLN2	23.6748	-0.0755195	6.55711e-124	7.50814e-123	H2AX	55.2635	5.66839	0	0	EFHC1	52.7234	6.79748	0	0	S100A11	14.4743	1.40761	1.7607e-47	3.30131e-45
CAV2	65.2544	4.17421	0	0	AC023424.3	0.0857115	1.3755	0.931696	0.999049	ANXA1	23.665	-0.0880481	8.26931e-124	9.39694e-123	CKS1B	55.1375	5.28988	0	0	C9orf135	52.6844	7.89657	0	0	MUC4	14.1558	7.48194	1.7201e-45	2.86684e-43
SOX17	65.1829	4.46477	0	0	AC090517.4	0.0787031	1.42756	0.937269	0.999049	CFAP126	22.8859	2.62882	6.42549e-116	6.83563e-115	UBE2T	54.6621	5.63242	0	0	LRRC46	52.6436	7.76731	0	0	S100A9	14.0517	7.91039	7.51735e-45	1.1276e-42
LRIG1	64.7621	4.45477	0	0	CACNB4	0.0661252	1.57087	0.947278	0.999049	TXN	22.8051	-0.263679	4.07803e-115	4.29266e-114	TYMS	54.6306	6.03094	0	0	DYDC2	52.4882	7.40966	0	0	ANXA2	13.984	1.17928	1.95087e-44	2.78696e-42
LGALS3	64.6492	3.38371	0	0	AF107885.2	0.0606141	1.60079	0.951667	0.999049	SCGB2A1	22.4695	0.611612	8.25632e-112	8.42481e-111	AURKB	54.4611	7.41301	0	0	ROPN1L	52.4347	7.91345	0	0	UCA1	13.7631	3.80735	4.24725e-43	5.79171e-41
CTSB	64.5526	4.38056	0	0	SYT1	0.0590942	1.55447	0.952877	0.999049	ROPN1L	22.2174	2.85973	2.33423e-109	2.34989e-108	UBE2C	54.4243	6.69442	0	0	TPPP3	52.4232	7.75209	0	0	DPP4	13.7201	6.8319	7.69465e-43	1.00365e-40
PRR15	64.4873	4.13222	0	0	ARHGEF3-AS1	0.0530747	1.54202	0.957672	0.999049	WDR86-AS1	20.5615	2.50187	6.07811e-94	5.54235e-93	TMPO	54.3356	4.98371	0	0	CAPSL	52.3692	8.02381	0	0	CLDN4	13.4255	2.73108	4.28876e-41	5.36095e-39
PODXL	64.0843	4.04914	0	0	AP002961.1	0.0530641	1.55541	0.957681	0.999049	C9orf116	20.5022	2.02225	2.05778e-93	1.87071e-92	TK1	53.6637	5.879	0	0	LRRIQ1	52.3473	7.142	0	0	KLK10	13.4202	3.8988	4.60654e-41	5.52785e-39
RESF1	63.1874	3.93021	0	0	FOXO1	0.0526582	0.891818	0.958004	0.999049	PERP	20.3062	0.319951	1.13306e-91	1.01772e-90	CKS2	53.469	5.34536	0	0	NME5	52.2497	6.70854	0	0	PLAU	13.0486	7.06419	6.47479e-39	7.47091e-37
MT-ND1	62.927	2.9092	0	0	AC092120.3	0.0520739	1.50757	0.95847	0.999049	ZMYND10	20.1617	2.65055	2.12464e-90	1.89137e-89	HMMR	53.1646	6.7532	0	0	MLF1	52.1848	6.8391	0	0	CSTB	12.9191	2.27644	3.51014e-38	3.90016e-36
CAV1	62.4953	4.36438	0	0	AC127024.2	0.0515669	1.27373	0.958874	0.999049	SAA1	19.0743	0.883494	4.12704e-81	3.41078e-80	CKAP2	53.095	5.64991	0	0	CABCOCO1	52.17	7.56592	0	0	HLA-A	12.5761	1.64199	2.85753e-36	2.85753e-34
RUNX3	62.4945	4.23408	0	0	AC005899.6	0.0465655	1.6871	0.96286	0.999049	AC007906.2	19.0257	2.12317	1.0458e-80	8.57209e-80	NCAPG	53.0494	6.86117	0	0	CFAP52	52.163	7.66284	0	0	KRT17	12.2127	5.02696	2.65832e-34	2.49218e-32
IFITM2	61.7324	4.31729	0	0	FBXW12	0.0465655	1.90546	0.96286	0.999049	CAPSL	18.913	2.66142	8.91941e-80	7.27125e-79	KIF2C	52.6041	6.18285	0	0	PIFO	52.1237	7.61015	0	0	SH3BGRL3	12.1858	2.34822	3.70177e-34	3.36524e-32
DIRAS2	61.1928	4.12137	0	0	AC018797.3	0.0460491	1.49101	0.963271	0.999049	FAM216B	18.863	2.85826	2.29821e-79	1.86341e-78	CCNA2	52.4312	7.05689	0	0	PRR29	52.1114	7.86312	0	0	MFGE8	12.1621	3.02375	4.94958e-34	4.2425e-32
RPL12	60.6741	3.76322	0	0	AC002429.2	0.0435764	1.12098	0.965242	0.999049	C1orf194	18.7066	2.57296	4.3771e-78	3.51104e-77	RRM2	51.9057	6.86329	0	0	WDR86-AS1	52.0697	7.53165	0	0	SLPI	11.776	1.35867	5.18774e-32	3.99057e-30
EYA2	60.4868	3.69717	0	0	FILIP1L	0.0433874	0.995319	0.965393	0.999049	FAM229B	18.6907	2.29342	5.88895e-78	4.71116e-77	NUF2	51.8877	6.68747	0	0	CFAP100	52.0694	7.78419	0	0	KRT23	11.5096	2.83353	1.18053e-30	8.23627e-29
S100A14	60.0517	4.11867	0	0	KLRD1	0.0395359	1.48861	0.968463	0.999049	TEKT1	18.1035	2.39732	2.99245e-73	2.30189e-72	CDK1	51.1589	5.89536	0	0	C11orf97	52.0644	7.86448	0	0	MALAT1	11.2558	0.685083	2.16879e-29	1.32783e-27
DMKN	59.5347	4.25798	0	0	AC022973.4	0.0390235	1.26749	0.968872	0.999049	IFI27	18.0673	0.246201	5.76245e-73	4.42131e-72	H2AZ2	51.1503	4.29789	0	0	PPIL6	52.0295	6.34455	0	0	CLDN3	11.0876	2.00064	1.441e-28	7.85999e-27
SNHG8	59.3749	4.36794	0	0	AC003093.1	0.0390076	1.32102	0.968884	0.999049	C11orf97	16.9683	2.47859	1.40899e-64	1.01367e-63	TRIB3	50.8557	5.03401	0	0	DNAH12	52.016	7.97183	0	0	DAPP1	10.9032	4.21775	1.11332e-27	5.56662e-26
SPDEF	59.2212	4.29194	0	0	NAALADL2-AS2	0.0330253	1.62729	0.973654	0.999049	DNAH12	16.8059	2.33744	2.20796e-63	1.56223e-62	CENPM	50.7234	5.34261	0	0	CCDC173	51.953	7.18244	0	0	LIPH	10.8588	5.75978	1.8117e-27	8.90998e-26
ITIH5	59.2059	3.78698	0	0	ZBTB46-AS1	0.0330253	1.67539	0.973654	0.999049	S100A10	16.7337	-0.326806	7.44914e-63	5.24587e-62	CDCA8	50.6416	6.49993	0	0	ZBBX	51.9526	7.65698	0	0	CD24	10.6396	2.22565	1.9496e-26	8.99815e-25
RPL10	59.1746	2.50832	0	0	AC009163.5	0.0330253	1.74646	0.973654	0.999049	B2M	16.4453	-0.071852	9.06894e-61	6.34191e-60	CKAP2L	50.2259	6.74407	0	0	FAM229B	51.8366	7.2662	0	0	GDF15	10.5649	2.92258	4.33657e-26	1.97117e-24
TGFBR2	58.987	3.61972	0	0	AC093382.1	0.0330173	1.42099	0.973661	0.999049	DRC1	16.1613	2.19771	9.45705e-59	6.49225e-58	CCNB1	50.0838	5.49572	0	0	CFAP300	51.8165	7.31074	0	0	TPM1	10.3575	2.97687	3.86918e-25	1.70699e-23
MT-ND5	58.9842	2.75108	0	0	AL133245.1	0.0330147	1.23993	0.973663	0.999049	ANXA2	15.9511	-0.21434	2.79955e-57	1.89586e-56	TUBB	50.0673	4.217	0	0	MARCHF10	51.7272	7.69963	0	0	SPNS2	10.3087	4.46604	6.43411e-25	2.75748e-23
DDX5	58.8499	3.79316	0	0	LINC02398	0.0325063	1.47182	0.974068	0.999049	TSPAN1	15.6914	0.974885	1.73323e-55	1.15549e-54	H4C3	49.8368	4.68705	0	0	SPAG8	51.7028	7.51404	0	0	MSLN	10.1552	2.91823	3.14066e-24	1.29068e-22
PKHD1L1	58.8148	3.9344	0	0	AC009269.2	0.0324983	1.31049	0.974075	0.999049	HSP90AB1	15.4767	-0.695637	4.98714e-54	3.31005e-53	KIF11	49.3975	5.833	0	0	IQCG	51.6952	6.52838	0	0	GLRX	9.80186	3.45233	1.10531e-22	4.09375e-21
CFTR	58.5968	3.75461	0	0	SLC7A9	0.0319952	1.31683	0.974476	0.999049	CFAP300	14.6742	2.06825	9.43187e-49	5.94446e-48	ANLN	49.2153	5.65281	0	0	CFAP126	51.6804	7.50601	0	0	IL4I1	9.52582	3.71887	1.63745e-21	5.77922e-20
COL18A1	58.4588	4.31344	0	0	BCL2L1-AS1	0.0290487	1.07087	0.976826	0.999049	FAM92B	14.0222	2.29821	1.14051e-44	6.99699e-44	ESCO2	48.8892	6.58946	0	0	RSPH4A	51.6661	7.62591	0	0	WNT7A	9.50121	3.25357	2.07459e-21	7.23694e-20
DUSP23	58.4477	3.62253	0	0	FGF1	0.0259944	1.38755	0.979262	0.999049	EFCAB1	13.5635	2.11806	6.59423e-42	3.91737e-41	EZH2	48.5085	5.03942	0	0	C9orf116	51.6246	6.66026	0	0	EZR	9.49398	1.10432	2.2239e-21	7.66862e-20
ACSL4	58.1507	3.73436	0	0	AL596223.1	0.0259944	1.53523	0.979262	0.999049	CCDC170	13.3823	1.89351	7.6718e-41	4.48643e-40	BUB1	48.0805	5.75623	0	0	UBXN10	51.6232	6.16267	0	0	SFN	9.31078	2.52771	1.269e-20	4.09355e-19
DEFB1	57.966	3.91153	0	0	LINC02627	0.0259891	1.15665	0.979266	0.999049	SMIM6	13.0897	1.95176	3.77175e-39	2.16353e-38	ATAD2	47.5956	5.19002	0	0	ARMC3	51.5959	6.71007	0	0	CDKN1A	9.23364	2.62757	2.61577e-20	8.3482e-19
PKM	57.7773	1.85959	0	0	FSIP2-AS1	0.0255299	0.798116	0.979632	0.999049	MORN5	13.0611	2.14005	5.49009e-39	3.14318e-38	NUCKS1	46.7267	3.33258	0	0	CFAP45	51.5556	7.35996	0	0	DUSP5	9.21534	4.55127	3.10293e-20	9.5967e-19
SLC34A2	57.4305	3.78488	0	0	TBX15	0.0254767	1.15651	0.979675	0.999049	TMEM190	12.6451	2.30491	1.19135e-36	6.68046e-36	CENPA	46.6623	5.88143	0	0	CCDC170	51.5423	7.26141	0	0	AREG	9.18516	3.0391	4.1091e-20	1.25789e-18
CLDN10	57.1633	4.20066	0	0	NALCN-AS1	0.0244652	1.17196	0.980482	0.999049	ENKUR	12.6329	1.99752	1.39093e-36	7.78507e-36	NCAPH	45.2124	5.98259	0	0	WDR54	51.486	6.50336	0	0	GPRC5A	9.18084	4.42793	4.27754e-20	1.29622e-18
UGT2B7	57.1403	3.85952	0	0	NPTX1	0.0189634	1.08892	0.98487	0.999049	MORN2	12.5691	1.06226	3.12286e-36	1.73492e-35	DLGAP5	44.8229	5.94187	0	0	C6orf118	51.3246	7.61009	0	0	GPR160	9.15567	4.36095	5.40199e-20	1.61337e-18
LGALS1	57.1207	4.19756	0	0	AL391839.1	0.0189634	1.28776	0.98487	0.999049	CIB1	12.4508	-0.223425	1.38399e-35	7.60433e-35	MCM7	44.5254	4.72117	0	0	SAXO2	51.2691	7.4215	0	0	GDA	9.05596	3.32619	1.35371e-19	3.83125e-18
PLAUR	57.0958	3.75534	0	0	GK-AS1	0.0189581	1.16244	0.984875	0.999049	ERICH3	11.7553	1.66015	6.63245e-32	3.44245e-31	PCNA	44.4191	4.44575	0	0	FOXJ1	51.229	6.45991	0	0	CD55	8.8724	2.12505	7.15869e-19	1.93478e-17
RPS12	56.7749	2.62963	0	0	LINC00596	0.0184471	1.22875	0.985282	0.999049	CFAP45	11.6221	1.88447	3.18191e-31	1.63734e-30	ASPM	44.121	6.16674	0	0	DNALI1	51.1953	5.99202	0	0	SERPINB1	8.75808	1.82464	1.98595e-18	5.18075e-17
SEC14L1	56.6653	3.57125	0	0	Z99127.1	0.0179387	1.12557	0.985688	0.999049	S100A11	11.4301	-0.604244	2.95615e-30	1.51339e-29	CENPK	44.024	4.66842	0	0	IFT27	51.15	6.16022	0	0	F3	8.56932	3.14052	1.04097e-17	2.6243e-16
MT-ND2	56.6131	2.65757	0	0	CCDC148-AS1	0.0179387	1.05853	0.985688	0.999049	C9orf135	11.3316	1.95007	9.15453e-30	4.64697e-29	H1-10	43.1852	3.81711	0	0	CCDC78	51.1212	7.94905	0	0	NUPR1	8.51833	3.79681	1.61866e-17	3.91612e-16
COL1A2	56.3845	3.68677	0	0	CDKL4	0.01792	0.930087	0.985703	0.999049	LRRC46	11.1623	1.87783	6.23299e-29	3.14798e-28	KPNA2	42.8457	4.03147	0	0	CFAP43	51.0578	7.02774	0	0	SCEL	8.40866	3.14395	4.14706e-17	9.95295e-16
RPL27A	56.3643	2.29922	0	0	PINCR	0.0174117	0.704398	0.986108	0.999049	AL357093.2	10.9855	2.17483	4.48912e-28	2.24456e-27	CDC20	42.4356	5.39663	0	0	SPA17	51.049	6.28244	0	0	CST3	8.32976	0.983104	8.10091e-17	1.90491e-15
SLPI	56.2807	2.13772	0	0	AL133259.1	0.0119325	1.26625	0.990479	0.999049	RRAD	10.3013	2.076	6.95366e-25	3.32181e-24	DEPDC1	42.0437	5.40941	0	0	DRC1	51.0452	7.19866	0	0	TGM2	8.30453	2.79949	1.00217e-16	2.27765e-15
AGR2	56.1861	4.05015	0	0	AC100821.2	0.0109104	1.02934	0.991295	0.999049	CCDC74A	9.81468	1.83752	9.73453e-23	4.50672e-22	CCDC34	41.505	3.9875	0	0	TTC29	50.8616	7.29393	0	0	TM4SF1	8.10365	2.62076	5.3333e-16	1.16787e-14
IFITM3	55.8533	3.26282	0	0	AC016597.2	0.00990959	0.983831	0.992093	0.999049	CCDC78	9.76109	1.7975	1.6537e-22	7.64423e-22	DUT	40.8829	3.63402	0	0	C9orf24	50.8332	7.87703	0	0	CITED2	8.05506	2.61156	7.94387e-16	1.72693e-14
PAX8	55.76	3.61536	0	0	INSYN2A	0.00942117	0.936984	0.992483	0.999049	DYNLRB2	9.6203	1.58327	6.56428e-22	3.00196e-21	H1-3	40.686	4.26529	0	0	AC007906.2	50.8241	6.92901	0	0	S100A10	8.00551	1.01246	1.18969e-15	2.53126e-14
ID2	54.8031	3.54281	0	0	DYSF	0.00542326	0.974332	0.995673	0.999049	WDR54	9.38531	1.13995	6.27291e-21	2.82563e-20	DDIT4	40.1464	3.88375	0	0	MNS1	50.8043	6.47231	0	0	KRT19	7.97808	1.03163	1.48631e-15	3.09648e-14
WFDC2	54.6107	2.81067	0	0	ALPK2	0.00542326	0.899242	0.995673	0.999049	SPA17	9.32787	1.08007	1.08019e-20	4.85117e-20	EIF4EBP1	40.1389	3.80692	0	0	SPATA17	50.721	6.40407	0	0	RASD1	7.97407	4.55154	1.53535e-15	3.17659e-14
CCND1	54.3845	3.74083	0	0	AC074091.2	0.00542326	0.964853	0.995673	0.999049	H1-2	9.27292	0.679859	1.81114e-20	8.12169e-20	PFN1	40.0857	2.25998	0	0	ODF3B	50.6633	6.40179	0	0	ITGB8	7.95018	0.999996	1.86239e-15	3.82682e-14
SH3BGRL3	54.3707	3.63488	0	0	DIO2	0.00490156	0.967541	0.996089	0.999049	AGR3	9.26429	0.990107	1.96383e-20	8.79326e-20	H1-4	39.7668	4.09082	0	0	OSCP1	50.5274	6.14452	0	0	KRT16	7.9438	3.78494	1.96079e-15	4.00161e-14
RPL13	54.3021	1.71297	0	0	AC092535.4	0.00490156	0.901894	0.996089	0.999049	CDC20B	9.1849	1.88888	4.11913e-20	1.81994e-19	CENPE	39.5808	5.57292	0	0	FAM92B	50.5073	7.83501	0	0	FTH1	7.66028	0.332907	1.85529e-14	3.45706e-13
KRT7	54.2188	4.01044	0	0	GAS1RR	0.00490156	0.91183	0.996089	0.999049	OMG	8.64789	1.92913	5.24617e-18	2.24836e-17	PTMA	39.5608	1.99994	0	0	DNAH9	50.4651	7.20747	0	0	PROM1	7.21313	2.55325	5.46789e-13	9.11315e-12
C3	53.7571	3.87172	0	0	AC090772.2	0.00438785	1.00591	0.996499	0.999049	RSPH4A	8.33077	1.67655	8.03172e-17	3.38891e-16	AURKA	39.2136	5.20152	0	0	C7orf57	50.4592	7.67281	0	0	VNN1	7.20507	4.82694	5.80158e-13	9.61588e-12
FTL	53.4384	4.05124	0	0	AC084816.1	0.00437454	0.768064	0.99651	0.999049	C11orf88	8.17896	1.90224	2.86308e-16	1.188e-15	TUBA1C	38.9152	3.51307	0	0	RSPH1	50.447	7.14069	0	0	ADAMTS9	7.1598	5.07272	8.07931e-13	1.32448e-11
RPS27L	53.3914	3.56664	0	0	AL161430.1	0.00388212	0.883782	0.996903	0.999049	MAP6	7.98767	1.62224	1.37508e-15	5.62787e-15	HES6	38.2894	3.6953	0	0	TNFAIP8L1	50.4117	6.51931	0	0	TMSB4X	7.12899	0.800611	1.01106e-12	1.63074e-11
SCD	53.3185	3.72025	0	0	LINC02742	0.00191511	0.848544	0.998472	0.999049	CABCOCO1	7.96141	1.53596	1.7009e-15	6.94244e-15	MCM3	38.1454	3.94471	0	0	CETN2	50.4106	5.42394	0	0	TSPAN1	6.90468	1.5976	5.03166e-12	7.94473e-11
NEDD9	53.2631	3.30358	0	0	STARD13-AS	0.0019018	0.800562	0.998483	0.999049	ANKRD66	7.81334	1.83919	5.56934e-15	2.25176e-14	SGO2	37.4137	4.71246	2.33949e-306	9.74788e-305	SPATA18	50.248	6.49324	0	0	PHLDB2	6.80695	8.01057	9.9693e-12	1.53374e-10
HLA-DRA	53.0361	3.47066	0	0	AC093152.1	-0.000425876	0.704711	0.99966	0.99966	DNAH9	7.30876	1.38084	2.69624e-13	1.05459e-12	NEK2	37.3652	4.52424	1.43729e-305	5.90669e-304	TUBA1A	50.2415	7.25442	0	0	ARHGAP29	6.68736	2.53154	2.27233e-11	3.34165e-10
SOX4	52.919	3.37336	0	0	AC002069.2	-0.00160901	0.93166	0.998716	0.999049	CCN2	7.18758	1.42552	6.59519e-13	2.55298e-12	MT-CO3	36.8781	1.80569	1.03526e-297	4.19702e-296	CFAP221	50.2202	6.99153	0	0	QPCT	6.62928	2.93627	3.37326e-11	4.93648e-10
ERO1A	52.8401	3.30093	0	0	LRRC19	-0.00160901	1.03248	0.998716	0.999049	ATP5IF1	7.1282	-1.09479	1.01689e-12	3.9061e-12	BTG3	36.4162	3.33287	2.36154e-290	9.44615e-289	TEKT2	50.0139	6.83484	0	0	MUC16	6.58357	1.24219	4.59271e-11	6.62411e-10
FGFBP1	52.6563	3.67312	0	0	CALB2	-0.00160901	0.72403	0.998716	0.999049	UBB	6.87895	-1.16554	6.02974e-12	2.28399e-11	PLK1	35.9856	5.41541	1.40572e-283	5.54891e-282	AGR3	49.997	6.2473	0	0	SFTA2	6.51197	2.8783	7.41696e-11	1.06464e-09
C2orf88	52.4791	3.73667	0	0	CD84	-0.00160901	0.969417	0.998716	0.999049	TFF3	6.62626	0.788672	3.44292e-11	1.28467e-10	MT-ND1	35.3416	2.13109	1.3488e-273	5.25506e-272	CCDC113	49.9726	6.37036	0	0	IL1RN	6.42581	4.36836	1.31172e-10	1.84749e-09
ID4	52.2012	3.3368	0	0	LINC01344	-0.00160901	0.803406	0.998716	0.999049	PRDX5	6.51729	-1.05075	7.15914e-11	2.6385e-10	STC2	34.9568	3.49862	1.02004e-267	3.92322e-266	DNAI1	49.8995	7.73631	0	0	NDRG1	6.41839	2.0703	1.37727e-10	1.92389e-09
FAM162A	52.0602	3.48853	0	0	LINC02698	-0.00212938	0.942037	0.998301	0.999049	SAXO2	6.46795	1.35111	9.93426e-11	3.63892e-10	MT-CYB	34.8749	1.97091	1.78748e-266	6.78789e-265	FANK1	49.8966	6.29364	0	0	PLAUR	6.41822	1.71161	1.37879e-10	1.92389e-09
SELENOP	51.7446	3.43961	0	0	AC016866.2	-0.00212938	0.857546	0.998301	0.999049	CFAP73	6.35266	1.20906	2.1163e-10	7.69564e-10	JUN	34.5229	3.64235	3.632e-261	1.362e-259	DNAJB13	49.846	6.11247	0	0	ITGA3	6.38156	1.83725	1.75293e-10	2.39036e-09
RPLP0	51.7132	2.07851	0	0	AC060765.2	-0.00212938	0.932869	0.998301	0.999049	EZR	6.14483	-1.15752	8.00501e-10	2.86234e-09	H1-5	34.4967	5.17494	8.98316e-261	3.3271e-259	CCDC65	49.8044	7.16965	0	0	MUC21	6.30821	8.40169	2.82273e-10	3.7974e-09
MGST1	51.6915	3.50313	0	0	LINC02680	-0.00645335	0.837786	0.994851	0.999049	TUBA4B	6.10843	1.46502	1.00614e-09	3.57633e-09	GDF15	34.4137	3.62988	1.57379e-259	5.75775e-258	CTXN1	49.8016	5.76393	0	0	CD9	6.26803	0.717225	3.65644e-10	4.87525e-09
TSC22D1	51.4958	3.38527	0	0	AP002075.1	-0.00864128	0.671995	0.993105	0.999049	DYDC2	6.05656	1.29543	1.39061e-09	4.93125e-09	MT-CO2	33.5982	2.27103	1.78069e-247	6.43624e-246	SLC44A4	49.7824	6.04367	0	0	IL32	6.18164	2.15256	6.34404e-10	8.34742e-09
CEBPD	51.4	3.48119	0	0	LGALS2	-0.00864128	0.709537	0.993105	0.999049	CETN2	5.90672	0.247373	3.48995e-09	1.22886e-08	HNRNPA2B1	33.0998	1.95237	2.98728e-240	1.06689e-238	IFT22	49.7656	5.22544	0	0	TMCC3	6.15839	4.643	7.34899e-10	9.5739e-09
CAT	51.3788	3.21114	0	0	XYLT1	-0.00864128	0.599065	0.993105	0.999049	FAM166B	5.369	1.55257	7.9176e-08	2.68697e-07	H1-1	33.0757	5.1189	6.63837e-240	2.34295e-238	DRC3	49.7651	7.00539	0	0	TNF	6.15315	4.03063	7.59591e-10	9.8223e-09
LDLR	51.3224	3.23489	0	0	AC010967.1	-0.00864128	0.941	0.993105	0.999049	C6orf118	5.30934	1.31939	1.10024e-07	3.71702e-07	FDPS	32.8968	3.34287	2.44405e-237	8.52575e-236	ENDOG	49.7258	6.10685	0	0	CTSB	6.12815	0.925454	8.89075e-10	1.13984e-08
RPL32	51.3138	2.83745	0	0	KCNMB2-AS1	-0.00864128	0.771606	0.993105	0.999049	FAM81B	5.28327	1.06577	1.26899e-07	4.27749e-07	NUCB2	32.7688	3.13249	1.63941e-235	5.65315e-234	ANKRD37	49.5929	6.41621	0	0	LAMB3	6.06406	1.22885	1.32725e-09	1.68006e-08
MEIS1	51.0793	3.0458	0	0	TMEM204	-0.00864128	0.604403	0.993105	0.999049	LDLRAD1	5.17406	1.72229	2.29065e-07	7.62704e-07	PHLDA1	32.2375	3.34205	5.25922e-228	1.79292e-226	LRRC6	49.5171	6.0592	0	0	ELF3	6.00982	1.99321	1.85734e-09	2.32168e-08
TPM4	51.0727	4.14653	0	0	AL157834.1	-0.00864128	0.821976	0.993105	0.999049	NUDC	5.08943	-0.0994786	3.59138e-07	1.18528e-06	GADD45A	31.8948	3.17972	3.15219e-223	1.06254e-221	CCDC74A	49.4808	7.37622	0	0	MYL6	5.93221	0.652047	2.98885e-09	3.68993e-08
SNHG29	51.0174	4.01325	0	0	AC007391.3	-0.00864128	0.612443	0.993105	0.999049	NME5	4.98514	0.850915	6.19182e-07	2.02568e-06	H1-0	31.4836	2.64169	1.45738e-217	4.85792e-216	CCDC153	49.4736	7.27766	0	0	JUN	5.84114	1.78084	5.18444e-09	6.19801e-08
ZFAS1	50.9732	3.95891	0	0	AL589693.1	-0.00864128	0.799546	0.993105	0.999049	CCDC65	4.97921	1.24586	6.38454e-07	2.08418e-06	MT-ATP6	31.3863	2.54574	3.10866e-216	1.02483e-214	MORN2	49.4566	5.66584	0	0	SAT1	5.83454	0.949975	5.39381e-09	6.37064e-08
RPS8	50.9423	2.59371	0	0	HIGD1B	-0.00916032	0.741229	0.992691	0.999049	TRIM55	4.92654	1.48097	8.36979e-07	2.71746e-06	HES4	31.3469	3.32972	1.0709e-215	3.49206e-214	CDHR4	49.4474	7.83289	0	0	MAL	5.81033	8.34571	6.23511e-09	7.27834e-08
WASL	50.9182	3.53703	0	0	AL157938.3	-0.00916032	0.729543	0.992691	0.999049	RIIAD1	4.7703	1.34501	1.8395e-06	5.88954e-06	MT-ND4	30.2427	1.77044	6.4989e-201	2.07412e-199	BBOF1	49.3053	6.27348	0	0	GPX3	5.80724	2.15018	6.35112e-09	7.38502e-08
RPS6	50.7813	2.31384	0	0	AC007533.2	-0.00916032	0.773018	0.992691	0.999049	IQCG	4.73195	0.840215	2.22369e-06	7.09689e-06	FBLN1	30.1954	2.94098	2.72185e-200	8.5953e-199	DNAH6	49.2891	6.87938	0	0	CEACAM6	5.69768	7.97421	1.21446e-08	1.3906e-07
IGFBP2	50.7049	3.43774	0	0	AC114689.3	-0.00967137	0.718097	0.992283	0.999049	CCDC173	4.6191	1.02032	3.85405e-06	1.22221e-05	MNS1	30.0077	3.08892	7.79478e-198	2.43587e-196	RIIAD1	49.226	7.56685	0	0	RND3	5.64576	1.91563	1.64449e-08	1.87584e-07
SPON1	50.3674	3.94983	0	0	DKK2	-0.0101851	0.699877	0.991874	0.999049	AKAP14	4.54341	1.48795	5.53502e-06	1.74423e-05	KLF5	29.402	3.03304	5.18243e-190	1.60281e-188	CASC1	49.1802	6.40434	0	0	EMP1	5.58315	1.2728	2.36196e-08	2.67391e-07
MFGE8	50.3636	3.00849	0	0	AL451137.2	-0.0106695	0.813956	0.991487	0.999049	SERPINA1	4.48649	-0.903957	7.24074e-06	2.2722e-05	SFN	29.3239	2.80236	5.14737e-189	1.57573e-187	CFAP53	49.1126	6.25525	0	0	MACROD2	5.58019	2.83406	2.40249e-08	2.70958e-07
TIMP1	50.2687	3.65524	0	0	AP001021.3	-0.0106908	0.763647	0.99147	0.999049	ARMC3	4.45864	0.796115	8.2483e-06	2.57759e-05	IER2	28.9928	2.84796	8.11706e-185	2.45972e-183	SPEF2	49.0931	5.94774	0	0	ACTB	5.52886	0.271917	3.22315e-08	3.56806e-07
HMGCR	50.0459	3.0902	0	0	AC007923.4	-0.0111566	0.766651	0.991098	0.999049	FOXJ1	4.37757	0.752656	1.2001e-05	3.73476e-05	PKP4	28.9513	2.67485	2.69983e-184	8.0995e-183	PPP1R42	49.0861	7.43966	0	0	TNFRSF12A	5.5229	0.75195	3.3344e-08	3.67765e-07
RARRES2	49.9708	4.05442	0	0	AC021851.2	-0.0111779	0.601103	0.991082	0.999049	CCDC113	4.24935	0.937007	2.14389e-05	6.56963e-05	IER3	28.7967	3.02159	2.35648e-182	6.93083e-181	DYNLL1	49.0685	4.12319	0	0	SERPINB7	5.49378	7.89723	3.93417e-08	4.30748e-07
FDPS	49.9669	3.90192	0	0	AC111170.2	-0.0156736	0.495187	0.987495	0.999049	TTC29	4.23193	1.0885	2.31693e-05	7.09265e-05	MT2A	28.7727	3.07126	4.70765e-182	1.37116e-180	C20orf96	49.0651	5.87883	0	0	MYO1E	5.45553	1.88188	4.88268e-08	5.23144e-07
CP	49.7696	3.60332	0	0	IGLC2	-0.0156736	0.569605	0.987495	0.999049	ZBBX	4.20152	1.08656	2.65124e-05	8.08306e-05	HUWE1	28.6582	2.80121	1.2653e-180	3.64991e-179	CAPS	49.0425	4.03268	0	0	HSP90AA1	5.33273	0.314752	9.67495e-08	1.00086e-06
EMP1	49.7566	3.21714	0	0	ZNF503-AS1	-0.0156736	0.581234	0.987495	0.999049	CFAP43	4.03656	0.916792	5.42417e-05	0.000163215	ERRFI1	28.4112	2.9085	1.46858e-177	4.19595e-176	SPAG17	49.0398	6.92841	0	0	ATF3	5.28405	1.83493	1.26359e-07	1.29377e-06
IGFBP3	49.752	3.42847	0	0	CPLX2	-0.0156815	0.476081	0.987488	0.999049	ZNF295-AS1	3.85114	1.59396	0.000117569	0.000347495	PLK4	28.3511	3.92936	8.11131e-177	2.25314e-175	FHAD1	49.0301	6.69424	0	0	STEAP4	5.24307	6.51143	1.57924e-07	1.58984e-06
ESR1	49.6253	2.93638	0	0	AC084782.2	-0.0161913	0.633502	0.987082	0.999049	EFHC1	3.71933	0.752539	0.000199752	0.000582367	ADIRF	28.1042	2.76737	8.70668e-174	2.39633e-172	TUBA4B	48.9918	7.67212	0	0	IQCD	5.213	2.10718	1.85809e-07	1.85809e-06
RBBP8	49.614	3.1707	0	0	SMIM18	-0.0162046	0.445876	0.987071	0.999049	DYNLT1	3.62533	-1.05817	0.000288598	0.000833296	H3-3B	27.833	1.56384	1.7303e-170	4.71901e-169	EFCAB2	48.988	6.26392	0	0	SAA2-SAA4	5.19196	2.37052	2.0809e-07	2.07399e-06
RPS14	49.4858	2.36614	0	0	LINC01619	-0.0191884	0.593436	0.984691	0.999049	S100A6	3.58771	-0.484934	0.000333591	0.000954935	H1-2	27.8202	2.85337	2.46837e-170	6.67128e-169	WDR78	48.9396	5.95317	0	0	SYTL2	5.1467	3.4938	2.65104e-07	2.61616e-06
NNMT	49.359	3.27038	0	0	AC034195.1	-0.0196209	0.597463	0.984346	0.999049	CCNA1	3.36772	0.657617	0.000757915	0.00213497	RPS27L	27.8141	2.92912	2.9325e-170	7.85492e-169	DTHD1	48.8425	7.43664	0	0	PHLDA2	5.12113	1.43673	3.03702e-07	2.97747e-06
ARHGAP26	49.2102	3.00098	0	0	SST	-0.0201626	0.361075	0.983914	0.999049	DTHD1	3.27569	0.993517	0.00105403	0.00293876	MT-CO1	27.2954	0.99866	4.8037e-164	1.27532e-162	KIF9	48.7928	5.30146	0	0	MICAL2	5.11644	3.29995	3.11363e-07	3.03736e-06
RPL37A	49.0317	2.49124	0	0	AC097634.4	-0.0214681	0.743891	0.982872	0.999049	DNALI1	3.13935	0.491426	0.00169322	0.00467741	PSAT1	27.1596	3.07503	1.95225e-162	5.1375e-161	CCDC74B	48.7667	7.25041	0	0	IRF1	5.05464	1.71	4.31206e-07	4.14621e-06
KRT19	48.8552	2.32967	0	0	AC121154.1	-0.0221815	0.170735	0.982303	0.999049	C22orf15	3.10634	1.4312	0.00189421	0.00521821	RBBP8	26.7883	2.70816	4.42539e-158	1.15445e-156	ERICH3	48.7518	6.69702	0	0	NEAT1	4.94349	0.548278	7.67379e-07	7.17177e-06
UNC93A	48.7024	3.28346	0	0	PLG	-0.0221815	0.281006	0.982303	0.999049	AK7	3.07064	0.956978	0.00213603	0.00585213	WASL	26.5509	2.8488	2.51083e-155	6.49352e-154	LRRC23	48.6122	6.04465	0	0	DEPP1	4.8828	3.38725	1.04591e-06	9.61181e-06
RIMS2	48.567	3.15192	0	0	AC090578.1	-0.0221815	0.00747798	0.982303	0.999049	CDKN1A	2.9868	0.409737	0.00281912	0.00765373	FAF1	26.5072	2.552	7.99906e-155	2.05104e-153	CFAP70	48.5431	6.251	0	0	S100A1	4.87675	2.75155	1.07847e-06	9.80423e-06
RPL8	48.3339	2.04754	0	0	AC132803.1	-0.0221815	0.162405	0.982303	0.999049	MLF1	2.98304	0.739177	0.00285403	0.0077415	HES1	26.3761	2.62331	2.57559e-153	6.54811e-152	RABL2A	48.5324	6.0297	0	0	CCND1	4.82445	0.845223	1.40392e-06	1.261e-05
ADIRF	48.2521	3.0927	0	0	AC105290.1	-0.0221815	-0.029443	0.982303	0.999049	SPAG17	2.97802	0.875391	0.00290118	0.00786226	MSX1	26.102	3.03345	3.46015e-150	8.72306e-149	MAP6	48.4552	6.96168	0	0	NFKBIZ	4.80374	1.55016	1.55727e-06	1.39457e-05
NDP	48.23	4.23767	0	0	PEX5L	-0.0221815	0.155632	0.982303	0.999049	C7orf57	2.9451	1.01544	0.00322854	0.0087101	ID4	26.0664	2.58571	8.76972e-150	2.19243e-148	MAPRE3	48.4063	6.18668	0	0	PLAAT3	4.66291	2.59562	3.11764e-06	2.74279e-05
GAPDH	48.1586	0.933467	0	0	AC068987.2	-0.0221815	0.23207	0.982303	0.999049	LRRIQ1	2.93796	0.734611	0.00330379	0.00888912	G0S2	26.0372	2.82697	1.87664e-149	4.65282e-148	TCTN1	48.3198	5.14913	0	0	HDAC9	4.63057	2.00147	3.6466e-06	3.18945e-05
NPC2	48.1315	3.68066	0	0	CNR2	-0.0221841	-0.0636246	0.982301	0.999049	DNAAF1	2.93265	0.773707	0.00336081	0.00903443	MDK	25.8694	3.2969	1.47287e-147	3.6218e-146	RIBC2	48.3154	6.11696	0	0	SDC4	4.60881	1.32292	4.04982e-06	3.5114e-05
PHLDA2	48.1031	3.15368	0	0	AC013762.1	-0.0221868	0.274898	0.982299	0.999049	CD164L2	2.85111	0.998903	0.00435674	0.0115973	IL1A	25.3115	2.86159	2.385e-141	5.81707e-140	PACRG	48.2915	6.94546	0	0	QPRT	4.59304	1.35702	4.36837e-06	3.76583e-05
BICD1	48.0818	2.96931	0	0	AL159169.2	-0.0227058	0.393146	0.981885	0.999049	DPY30	2.82261	-0.3164	0.00476343	0.0126575	MGST1	25.2819	2.80127	5.04712e-141	1.22108e-139	IK	48.286	5.21144	0	0	TPM4	4.49656	0.581741	6.90612e-06	5.7233e-05
EHF	48.0189	3.56741	0	0	AC097500.1	-0.0227058	0.502793	0.981885	0.999049	CFAP161	2.73089	1.16578	0.00631644	0.0166514	LY6E	25.1489	3.16706	1.45445e-139	3.49067e-138	DPCD	48.1364	5.17967	0	0	CCL28	4.42498	2.36766	9.64508e-06	7.84152e-05
TPT1	47.9975	1.28228	0	0	EPN2-AS1	-0.0227058	0.493401	0.981885	0.999049	PACRG	2.72042	0.93484	0.00652	0.017173	LGALS1	24.902	2.91516	7.07659e-137	1.6849e-135	TMEM67	48.0209	6.10328	0	0	ABLIM3	4.39893	3.42887	1.08784e-05	8.82029e-05
RPL30	47.9328	2.43142	0	0	GATA3	-0.0227085	0.304764	0.981883	0.999049	ANKRD44-AS1	2.60341	1.28808	0.00923007	0.0238915	CEBPD	24.8894	2.73205	9.69242e-137	2.28955e-135	DUSP18	47.9825	6.17216	0	0	GADD45A	4.31245	1.00746	1.61457e-05	0.000128481
CD55	47.9243	2.94792	0	0	AL354811.1	-0.0232222	0.548732	0.981473	0.999049	PCSK1N	2.54123	1.098	0.0110463	0.0284699	SLC7A11	24.8032	2.45353	8.2886e-136	1.94264e-134	MAP3K19	47.9642	7.41817	0	0	EREG	4.30101	4.56339	1.70024e-05	0.000134583
KLF5	47.7484	3.40413	0	0	AC023480.1	-0.0232222	0.43779	0.981473	0.999049	GSTA3	2.46281	1.51557	0.0137852	0.0350768	LCN2	24.3353	2.67494	8.30614e-131	1.93166e-129	RIBC1	47.9618	6.70377	0	0	CKB	4.2308	1.16104	2.32864e-05	0.000180983
MGLL	47.6691	3.38718	0	0	TGIF2-RAB5IF	-0.0232222	0.545203	0.981473	0.999049	MAP3K19	2.42548	0.966649	0.0152881	0.038767	ATF3	24.2464	2.59968	7.20829e-130	1.66345e-128	CD164L2	47.9432	7.23082	0	0	ICAM1	4.2288	2.48876	2.34946e-05	0.000182129
RPL23	47.6603	2.72925	0	0	P2RY12	-0.0232222	0.550851	0.981473	0.999049	CFAP52	2.36826	0.873078	0.0178722	0.0449803	TNFRSF12A	23.9969	2.74437	2.9964e-127	6.86198e-126	IFT43	47.8905	5.07442	0	0	EDN1	4.17651	2.61687	2.96021e-05	0.000224259
KMT2C	47.1183	2.83881	0	0	CR381653.1	-0.0232275	0.507253	0.981469	0.999049	ARMC4	2.32869	1.05563	0.0198755	0.0498966	C12orf75	23.9166	2.36969	2.05702e-126	4.67506e-125	WDR66	47.8655	6.40489	0	0	IER2	4.04016	0.932485	5.34137e-05	0.000394683
PIGR	46.9998	3.07295	0	0	LINC02154	-0.0232328	0.245279	0.981465	0.999049	MIR205HG	2.22664	0.967986	0.0259717	0.064259	SPATS2L	23.8666	2.32152	6.80819e-126	1.53568e-124	ODF2L	47.8626	5.14298	0	0	CCN1	4.01059	1.70563	6.05678e-05	0.000445352
STC2	46.9649	3.04294	0	0	AL592156.1	-0.0237306	0.608235	0.981068	0.999049	C1orf87	2.20708	1.07125	0.0273087	0.0672078	C21orf58	23.8645	2.58975	7.16718e-126	1.60459e-124	CIB1	47.8452	4.22167	0	0	GADD45B	3.92941	1.48406	8.51542e-05	0.000611154
CLDN4	46.8925	3.12443	0	0	AC015853.3	-0.0242629	0.449314	0.980643	0.999049	SPAG8	2.15044	0.830764	0.03152	0.0769407	UNC93A	23.8531	2.60977	9.40701e-126	2.09045e-124	SNTN	47.7979	7.57999	0	0	UPK2	3.88326	5.62352	0.000103067	0.000727533
SLC26A2	46.8452	3.54636	0	0	AC024084.2	-0.0261847	0.531762	0.97911	0.999049	LRRC10B	2.14767	0.96164	0.03174	0.0774146	MFGE8	23.7789	2.32514	5.51944e-125	1.21752e-123	LRRC10B	47.7754	7.50563	0	0	FAM107A	3.85314	2.76024	0.000116615	0.00081359
PLA2G4A	46.8143	2.91579	0	0	AL133297.2	-0.02619	0.626289	0.979106	0.999049	FHAD1	2.1423	0.7961	0.032169	0.0783805	EMP1	23.7716	2.55175	6.56911e-125	1.43849e-123	SPATA6	47.7046	6.08652	0	0	LDHA	3.82004	0.451686	0.000133431	0.000924464
RPL7A	46.7796	2.64822	0	0	ATP10B	-0.0266505	0.529905	0.978738	0.999049	STOML3	2.02488	1.07892	0.04288	0.102994	MT-ND2	23.387	1.78957	5.79531e-121	1.25985e-119	AK7	47.6641	6.35129	0	0	TCIM	3.76896	1.36385	0.000163928	0.00111516
AHNAK	46.7668	3.517	0	0	COL10A1	-0.0292151	0.0940199	0.976693	0.999049	H2BC4	1.97011	0.960281	0.0488263	0.116438	NQO1	23.3364	2.39138	1.8931e-120	4.08582e-119	IFT57	47.5527	5.02962	0	0	MACC1	3.74862	1.15961	0.00017781	0.00120142
APOL1	46.6873	2.92149	0	0	CPNE9	-0.0292151	0.154074	0.976693	0.999049	SCGB1D4	1.86745	1.47621	0.0618386	0.145731	RUNX3	23.3301	2.48991	2.19723e-120	4.70834e-119	TSGA10	47.5333	6.05078	0	0	CCN2	3.74634	1.60939	0.000179435	0.00120968
CALB1	46.6417	3.43356	0	0	DENND5B-AS1	-0.0292151	0.195348	0.976693	0.999049	CSTB	1.81384	-1.46499	0.069703	0.163112	ID2	23.3155	2.36768	3.08966e-120	6.57374e-119	B9D1	47.4501	5.35953	0	0	NCCRP1	3.70526	8.06844	0.000211177	0.00141413
TMSB10	46.6086	1.74444	0	0	AC024560.3	-0.0292151	0.164487	0.976693	0.999049	CEP126	1.7764	0.68693	0.0756664	0.176105	EGR1	22.814	2.3936	3.32817e-115	7.03135e-114	RUVBL1	47.3584	5.04969	0	0	ADGRF1	3.69061	3.41074	0.000223721	0.00149479
LINC01541	46.5886	3.70043	0	0	DNAH8	-0.0292151	0.0135491	0.976693	0.999049	NEK10	1.73249	0.917765	0.0831871	0.192414	CEP350	22.7558	2.17346	1.25734e-114	2.63778e-113	RFX2	47.3513	6.57096	0	0	RPS27L	3.60942	0.431204	0.000306883	0.00199707
RPL5	46.577	2.11434	0	0	ACSBG2	-0.0292151	0.15282	0.976693	0.999049	CFAP299	1.68359	0.784939	0.0922613	0.212258	RIPK2	22.7464	2.2462	1.5564e-114	3.24251e-113	UBXN11	47.3229	5.75382	0	0	ISG15	3.56591	0.927585	0.0003626	0.00232934
FBLN1	46.5464	2.99918	0	0	CRB2	-0.0292177	-0.00386358	0.976691	0.999049	FABP6	1.65031	1.59757	0.0988793	0.224896	DUSP6	22.6344	2.35057	1.98939e-113	4.11599e-112	CFAP36	47.1511	4.82083	0	0	RAET1G	3.54467	6.12531	0.000393107	0.00251455
MUC16	46.5378	3.18929	0	0	WNK4	-0.0297381	0.324805	0.976276	0.999049	PLAC8	1.52245	0.940697	0.127896	0.285057	STAG1	22.6253	2.38659	2.44225e-113	5.01833e-112	NPHP1	47.0682	5.89659	0	0	S100A6	3.49333	-0.0447651	0.000477036	0.00300023
ASRGL1	46.505	3.27098	0	0	AL929236.1	-0.0297381	0.546185	0.976276	0.999049	MALAT1	1.50579	0.000268556	0.13212	0.293384	TXNIP	22.6144	2.70343	3.12907e-113	6.38586e-112	DNAH3	47.0587	6.86329	0	0	CXCL8	3.41447	1.26364	0.00063907	0.00392068
IER2	46.3608	2.9292	0	0	FABP3	-0.0297381	0.265578	0.976276	0.999049	SERPINA6	1.49922	0.974141	0.133817	0.296712	LIF	22.4909	2.43263	5.09741e-112	1.03326e-110	CC2D2A	47.02	5.79997	0	0	KRT18	3.40796	0.176558	0.000654499	0.00400714
HSPA5	46.1031	3.65586	0	0	AC007620.2	-0.0297381	0.348878	0.976276	0.999049	CFAP221	1.47853	0.705548	0.139267	0.306981	SDC4	22.4327	2.16651	1.88924e-111	3.80384e-110	CFAP46	46.9986	6.26131	0	0	CST6	3.35281	2.99647	0.000799949	0.00479969
SORBS2	46.0752	2.76869	0	0	PRKX-AS1	-0.0297381	0.415136	0.976276	0.999049	CFAP157	1.44759	0.498964	0.147731	0.323026	ISG15	22.3046	2.23543	3.33662e-110	6.67324e-109	RPGR	46.9946	5.64468	0	0	LINC02672	3.34039	1.37704	0.00083662	0.00497002
IL1R2	45.2269	3.22384	0	0	CKM	-0.0297408	0.225382	0.976274	0.999049	CHCHD2	1.41628	-1.54456	0.156693	0.340885	REV3L	22.2821	2.14631	5.50771e-110	1.09425e-108	CDHR3	46.945	7.22373	0	0	C3	3.3061	0.247079	0.000946061	0.00551103
PHLDA1	45.178	3.09578	0	0	DIRC3	-0.0297408	0.183326	0.976274	0.999049	CATIP	1.33357	0.82009	0.182345	0.391577	RARRES2	22.2084	2.90914	2.85191e-109	5.62878e-108	TUBB4B	46.878	3.91702	0	0	S100P	3.27108	1.96426	0.00107138	0.00616918
PTPRM	45.102	2.64633	0	0	EGLN3-AS1	-0.0297461	0.212854	0.97627	0.999049	MS4A8	1.2997	0.917151	0.193705	0.412431	ZFAS1	22.0696	2.78178	6.19785e-108	1.21527e-106	AK8	46.8136	6.09952	0	0	TNFAIP3	3.26849	1.40802	0.00108121	0.00620587
NFKBIA	44.7269	3.08916	0	0	AC097716.1	-0.0302531	0.351479	0.975865	0.999049	SPATA18	1.29906	0.62806	0.193922	0.412599	SOX17	21.9426	2.77737	1.01909e-106	1.98525e-105	MT-ND2	46.6753	2.33978	0	0	LIF	3.2298	1.17285	0.00123879	0.00699905
CD9	44.6829	3.61129	0	0	AC010623.1	-0.0302531	0.498918	0.975865	0.999049	DUOXA2	1.27624	1.73416	0.20187	0.428903	SYNE2	21.5556	2.29085	4.68909e-103	9.07565e-102	PHTF1	46.6611	5.39766	0	0	PGBD5	3.22899	3.92119	0.0012423	0.00700544
DUT	44.5547	2.98533	0	0	AC090630.1	-0.0302598	0.403696	0.97586	0.999049	HABP2	1.19199	1.01675	0.233263	0.487659	NDUFAF3	21.4566	2.34118	3.95964e-102	7.6147e-101	CDS1	46.628	5.43646	0	0	IFIT3	3.19616	1.47541	0.0013927	0.00778044
GABRP	44.4295	3.42387	0	0	RARB	-0.0307655	0.418998	0.975457	0.999049	DNAI2	1.18377	0.756881	0.236502	0.493398	AREG	21.3706	2.36648	2.50767e-101	4.79173e-100	TMEM232	46.574	6.22969	0	0	MX1	3.18313	1.10122	0.00145691	0.00812405
PLK2	44.3531	2.87092	0	0	CCL5	-0.0307921	0.154135	0.975435	0.999049	CFAP100	1.10498	0.673574	0.269167	0.554221	PCM1	21.1802	2.31838	1.45455e-99	2.7618e-98	C11orf74	46.5721	5.60975	0	0	RAB42	3.16821	2.92759	0.00153383	0.00850554
FOS	44.3384	2.95208	0	0	AC068491.2	-0.0312779	0.348758	0.975048	0.999049	MAP1A	1.07552	0.934558	0.282143	0.577374	CXCL3	21.0619	2.32881	1.77747e-98	3.35372e-97	DNAL1	46.5536	5.40149	0	0	MACF1	3.02515	0.616015	0.00248508	0.0131951
LAMB3	44.2862	2.77992	0	0	AP000779.1	-0.0332077	0.576357	0.973509	0.999049	PTGES3	1.01346	-1.15797	0.310842	0.625436	PTGES3	21.0243	2.42568	3.93338e-98	7.37509e-97	SMIM6	46.5532	6.54821	0	0	KLK6	2.99861	2.75357	0.00271216	0.0142495
ISG15	44.2181	2.77462	0	0	AL354822.1	-0.0337014	0.609821	0.973115	0.999049	VWA3B	0.998881	0.73665	0.317852	0.63783	MT-ND5	20.923	1.81834	3.30955e-97	6.16687e-96	SPEF1	46.5116	6.83957	0	0	PLAAT4	2.88892	1.10621	0.00386561	0.0198917
ACTG1	44.2064	3.12549	0	0	AC025442.2	-0.0341126	0.594741	0.972787	0.999049	CDHR3	0.997611	0.577188	0.318468	0.638212	RXFP1	20.8245	2.08401	2.5948e-96	4.80518e-95	C21orf58	46.4744	6.20295	0	0	BANK1	2.88735	1.33986	0.00388499	0.0199572
VIM	43.8134	3.25855	0	0	AP003086.1	-0.0354528	0.663653	0.971719	0.999049	CCDC74B	0.994309	0.719994	0.320073	0.640572	TSC22D1	20.7922	2.34483	5.08799e-96	9.3644e-95	GON7	46.4338	5.00114	0	0	ERO1A	2.86022	0.477606	0.00423346	0.0215626
RPLP2	43.7644	1.92522	0	0	SLC30A10	-0.0362487	-0.175833	0.971084	0.999049	DNAI1	0.974117	0.649049	0.329999	0.654759	KRT23	20.7694	2.22545	8.18164e-96	1.49664e-94	FAM216B	46.2729	7.21113	0	0	CTSS	2.84899	1.16401	0.00438579	0.0222629
SCGB1D2	43.4549	3.07063	0	0	LINC02631	-0.0362487	-0.018881	0.971084	0.999049	PPP1R42	0.891126	0.638431	0.372861	0.725973	FOS	20.7206	2.14528	2.25672e-95	4.10314e-94	WDR63	46.2277	6.80211	0	0	CD14	2.84156	3.98056	0.00448939	0.0227503
MUC5B	43.3583	3.08061	0	0	RAB30	-0.0362487	0.0662945	0.971084	0.999049	AL133331.1	0.884221	1.04404	0.376577	0.732165	CXCL5	20.5077	2.30808	1.83964e-93	3.32466e-92	CFAP299	46.1969	6.85495	0	0	SBSN	2.84036	6.08648	0.00450622	0.0227971
LINC01320	43.1959	2.87227	0	0	CNOT10-AS1	-0.0362487	0.0885378	0.971084	0.999049	DNAH3	0.850427	0.652506	0.395088	0.758811	DUSP23	20.4206	2.22261	1.09685e-92	1.97039e-91	TSPAN1	46.1905	5.23336	0	0	PAX8	2.83091	0.266396	0.00464165	0.0234033
RPS20	43.194	2.33591	0	0	AL136164.2	-0.0362487	-0.00577194	0.971084	0.999049	HNRNPA2B1	0.817152	-1.36744	0.413842	0.78777	SPTBN1	20.3949	2.0882	1.85623e-92	3.31469e-91	IQCD	46.1839	5.91782	0	0	TM4SF4	2.8042	4.91329	0.00504419	0.0252631
RIPK2	43.0959	2.67734	0	0	AL645929.2	-0.0362487	0.0035026	0.971084	0.999049	DHRS9	0.749817	0.675766	0.453365	0.847939	DLEU2	20.3273	2.81908	7.38065e-92	1.31017e-90	RUVBL2	46.0472	4.78677	0	0	SLCO3A1	2.79068	1.99839	0.00525979	0.0260816
TXNIP	42.988	3.78038	0	0	AC082651.1	-0.0362513	-0.0919175	0.971082	0.999049	TCTEX1D1	0.660087	1.02427	0.509198	0.918577	CHCHD2	20.3203	2.266	8.50826e-92	1.50146e-90	CDKN1A	46.0368	5.84759	0	0	RSAD2	2.7653	2.57762	0.00568711	0.0279236
PTGS2	42.979	3.01416	0	0	TMPRSS12	-0.0362513	-0.31051	0.971082	0.999049	ANXA8	0.636651	0.849409	0.524352	0.939138	RCAN1	20.223	2.18852	6.14823e-91	1.07864e-89	HYDIN	45.9972	5.98663	0	0	XDH	2.75627	3.76362	0.00584652	0.028566
RPL11	42.9249	2.04606	0	0	AC023590.1	-0.0367704	0.215073	0.970668	0.999049	PLPPR3	0.611078	0.838452	0.541148	0.962896	RUVBL2	20.2034	2.14704	9.141e-91	1.59436e-89	NEK11	45.9967	5.50962	0	0	EHF	2.73898	0.234841	0.00616303	0.0298693
HUWE1	42.8222	2.73481	0	0	CD52	-0.0367704	0.31429	0.970668	0.999049	LINC01513	0.608892	0.718656	0.542596	0.963645	PLCB1	20.1704	1.94175	1.78067e-90	3.08786e-89	TTC21A	45.9937	6.93063	0	0	MAP2	2.72449	3.03161	0.00644016	0.0309623
PKP4	42.445	2.53651	0	0	ABCB1	-0.0367704	0.2966	0.970668	0.999049	CFAP77	0.607535	0.708743	0.543496	0.963645	TPM4	20.029	2.85246	3.07755e-89	5.30613e-88	DNAH11	45.9935	6.03093	0	0	ZBED2	2.69733	1.42669	0.00698979	0.0333907
TNFRSF12A	42.402	3.34631	0	0	AL161757.5	-0.0367704	0.375999	0.970668	0.999049	WDR38	0.602127	0.719133	0.54709	0.964318	OXR1	19.8753	1.87241	6.65863e-88	1.14148e-86	TEX9	45.8917	5.60981	0	0	NFKBIA	2.6812	0.464319	0.00733596	0.0347676
TACSTD2	42.2613	3.44828	0	0	PLCD4	-0.0367704	0.218983	0.970668	0.999049	C1orf158	0.571036	0.795893	0.567975	0.992208	CAV2	19.7753	2.3415	4.86063e-87	8.28516e-86	DLEC1	45.8844	7.04535	0	0	INPP4B	2.67413	1.18743	0.00749235	0.035397
EGLN3	41.8949	2.76438	0	0	LINC02158	-0.0367757	0.173562	0.970664	0.999049	PPIL6	0.524021	0.372434	0.600264	0.999148	LINC02672	19.7416	2.25323	9.47904e-87	1.60662e-85	CROCC2	45.8605	7.35187	0	0	CSTA	2.63976	1.93143	0.00829637	0.0387681
RPS13	41.8781	2.20965	0	0	AC022872.1	-0.0367757	0.134629	0.970664	0.999049	AC023300.2	0.446616	0.953539	0.655152	0.999148	IFT22	19.5382	2.09329	5.20294e-85	8.769e-84	SPAG16	45.6365	4.78213	0	0	C12orf75	2.63489	0.753105	0.0084164	0.0392068
PCDH7	41.6052	2.49328	0	0	AL121768.1	-0.0367784	0.161541	0.970662	0.999049	DERL3	0.440592	0.773773	0.659509	0.999148	PRIM2	19.4276	2.7046	4.51254e-84	7.56292e-83	DPY30	45.5341	4.45622	0	0	NID2	2.50578	4.8268	0.012218	0.0542218
SF3B5	41.2438	3.28851	0	0	LINC02831	-0.0372841	0.306593	0.970258	0.999049	PLAT	0.426875	1.14435	0.66947	0.999148	RUVBL1	19.3314	1.96735	2.92403e-83	4.87338e-82	PIH1D2	45.5053	6.23147	0	0	FN1	2.47052	4.66672	0.0134918	0.0592611
FNDC3B	40.9508	2.41906	0	0	H4C1	-0.0372841	0.534617	0.970258	0.999049	EFHB	0.424206	0.67552	0.671416	0.999148	PTGS2	19.1307	2.1532	1.40223e-81	2.32415e-80	VWA3A	45.4373	6.06228	0	0	CLDN9	2.46684	2.93748	0.013631	0.0597792
S100A2	40.8659	2.68996	0	0	AL512785.2	-0.0377951	0.38116	0.969851	0.999049	LINC02166	0.379557	0.621328	0.704274	0.999148	E2F7	19.0967	2.5875	2.6877e-81	4.43027e-80	TTC26	45.3982	5.94572	0	0	CLIC5	2.46636	1.14577	0.0136496	0.0597792
RPS23	40.7681	2.28676	0	0	AC011442.1	-0.0432823	-0.202717	0.965477	0.999049	PIH1D3	0.355209	0.74832	0.722433	0.999148	CLDN10	19.0892	2.73231	3.10465e-81	5.08959e-80	NUDC	45.2468	4.45138	0	0	LAYN	2.4461	4.13358	0.0144412	0.0627113
LDHA	40.5403	3.48093	0	0	LINC02801	-0.0432823	0.0387999	0.965477	0.999049	AL355601.1	0.339122	0.785768	0.734518	0.999148	CTSB	19.0402	2.588	7.92316e-81	1.29182e-79	GIHCG	45.1858	5.73629	0	0	PADI1	2.44431	2.46604	0.014513	0.0629177
CLDN3	40.4005	3.06309	0	0	SMTNL1	-0.0432823	-0.136547	0.965477	0.999049	RGS22	0.329716	0.698007	0.741615	0.999148	ARL3	19.0157	2.16515	1.26467e-80	2.03979e-79	NME7	45.1733	5.23519	0	0	AQP3	2.4244	2.82607	0.0153336	0.0661884
RPL18	40.3906	2.17728	0	0	AC015687.1	-0.0432823	-0.12351	0.965477	0.999049	DNAH10	0.323667	0.567073	0.74619	0.999148	CDC42BPA	18.8798	1.86285	1.67237e-79	2.66868e-78	CCDC40	45.1231	5.75591	0	0	GALNT5	2.35349	5.56623	0.018598	0.0785832
MT1E	40.2519	2.84115	0	0	AC084864.2	-0.0432823	-0.0382602	0.965477	0.999049	MARCHF10	0.283547	0.507284	0.776757	0.999148	NEDD9	18.8005	2.00365	7.4785e-79	1.18706e-77	ANKMY1	45.0784	5.38074	0	0	AKAP12	2.32843	2.68242	0.0198892	0.0832184
DUSP6	40.2499	2.62227	0	0	MC1R	-0.0432823	-0.160644	0.965477	0.999049	PPP1R32	0.258054	0.663074	0.796365	0.999148	CAV1	18.7543	2.54372	1.7852e-78	2.81874e-77	AK9	45.0465	5.6808	0	0	TNFSF15	2.32419	1.52666	0.0201153	0.0840471
RPS2	40.237	1.60527	0	0	MIR155HG	-0.0432823	-0.151291	0.965477	0.999049	LRRC71	0.251245	0.675797	0.801625	0.999148	NFKBIA	18.4387	2.13092	6.42101e-76	1.00854e-74	EFHC2	44.9318	5.91887	0	0	SLC6A14	2.30473	4.29287	0.0211816	0.0877119
IL1A	40.1924	2.89817	0	0	BX284613.2	-0.0432849	-0.186194	0.965474	0.999049	AC005487.1	0.238185	1.32326	0.811737	0.999148	NNMT	18.3937	2.05501	1.47526e-75	2.3051e-74	STK33	44.8836	5.9091	0	0	IFIT2	2.27698	1.446	0.0227871	0.0930977
HLA-A	40.0489	3.53369	0	0	HTR3B	-0.0432849	-0.211825	0.965474	0.999049	CCDC190	0.225177	0.852003	0.821842	0.999148	SOX4	18.3847	2.03643	1.74132e-75	2.70671e-74	VWA3B	44.8319	6.57663	0	0	PSD3	2.27347	1.4397	0.0229979	0.0937416
TPM1	39.7733	2.41935	0	0	NHS-AS1	-0.0432849	-0.301945	0.965474	0.999049	WDR63	0.213976	0.607256	0.830566	0.999148	MAP1B	18.2561	2.01633	1.84986e-74	2.86061e-73	LRWD1	44.8251	5.95162	0	0	CA12	2.2695	1.04929	0.0232377	0.0944621
DDIT4L	39.6978	3.11581	0	0	GRM5	-0.0432876	-0.333767	0.965472	0.999049	STAR	0.212134	1.61406	0.832002	0.999148	DEFB1	18.2359	1.97556	2.67957e-74	4.12241e-73	EFCAB10	44.7254	5.65802	0	0	CREB5	2.25914	2.14243	0.0238744	0.0965273
KRT23	39.6119	2.54875	0	0	EFCAB8	-0.0432876	-0.278456	0.965472	0.999049	MGST3	0.209246	-0.877528	0.834256	0.999148	IGFBP2	18.1687	2.2425	9.14029e-74	1.39902e-72	B9D2	44.6785	5.78943	0	0	CYP3A5	2.23691	2.86097	0.0252923	0.10144
MSLN	39.5975	2.68053	0	0	CARMIL3	-0.0438026	0.0854079	0.965062	0.999049	SRD5A2	0.172347	1.0359	0.863165	0.999148	RPL32	18.1594	1.87575	1.08166e-73	1.64719e-72	CSPP1	44.6659	5.27673	0	0	ALKAL2	2.23534	0.914522	0.0253949	0.101715
CCDC146	39.5543	3.19799	0	0	NLRC3	-0.0438026	0.101724	0.965062	0.999049	AL121956.6	0.163839	0.65347	0.869858	0.999148	SSH2	18.1083	1.83343	2.74096e-73	4.15297e-72	HMGN3	44.6467	4.35804	0	0	HOPX	2.20967	8.67564	0.0271277	0.107935
RPS5	39.0843	2.35933	0	0	AC092794.2	-0.0438026	0.0395665	0.965062	0.999049	TTC21A	0.153286	0.545045	0.878173	0.999148	CENPP	18.0229	3.75417	1.28768e-72	1.94123e-71	CFAP77	44.6368	6.90121	0	0	WFDC12	2.20753	7.53032	0.0272771	0.108386
RPS18	38.861	2.48927	0	0	RBMS3-AS2	-0.0438026	0.0896737	0.965062	0.999049	STMND1	0.15273	0.641557	0.878612	0.999148	CLDN1	17.8386	1.80713	3.54357e-71	5.31535e-70	UFC1	44.5803	4.72204	0	0	SCGB2A2	2.15933	1.23374	0.0308244	0.121038
SERPINB1	38.616	2.67359	0	0	Z82215.1	-0.0438053	0.182991	0.96506	0.999049	SLC17A3	0.15109	1.03467	0.879904	0.999148	MEIS1	17.8141	1.79905	5.49401e-71	8.20001e-70	CKB	44.5456	5.18973	0	0	TFF1	2.15535	2.01152	0.0311346	0.121994
HES1	38.5927	2.546	0	0	AL031727.2	-0.0438053	-0.0379277	0.96506	0.999049	C1orf189	0.149316	0.659512	0.881305	0.999148	NHSL1	17.7387	1.95189	2.10743e-70	3.12985e-69	IFT81	44.5065	5.16061	0	0	THBS1	2.15516	3.73182	0.0311492	0.121994
SNCB	38.5032	3.34698	0	0	AC114267.1	-0.0438106	-0.154454	0.965055	0.999049	CCDC198	0.143378	0.647666	0.885991	0.999148	CDKN2A	17.7114	2.35434	3.4263e-70	5.0635e-69	SRI	44.4663	4.28605	0	0	AC025580.2	2.14802	5.10594	0.0317121	0.124037
MYL6	38.385	2.9502	0	0	SHISA9	-0.044315	0.407292	0.964653	0.999049	CLCA4	0.102489	1.11837	0.918369	0.999148	RPS2	17.6741	1.10919	6.64374e-70	9.7702e-69	CAPS2	44.3142	6.20063	0	0	TAGLN	2.1452	3.1595	0.0319368	0.124591
UCA1	38.3341	2.5083	0	0	AL450992.4	-0.044315	0.202412	0.964653	0.999049	RIBC1	0.0961686	0.566721	0.923387	0.999148	ZFAND3	17.6444	1.65362	1.12445e-69	1.64554e-68	CLMN	44.2721	5.08877	0	0	SLC6A12	2.14125	3.75407	0.0322543	0.125503
IL1B	38.0739	2.80092	0	0	AP001831.1	-0.0448194	0.415798	0.964251	0.999049	LAPTM5	0.0953147	0.675082	0.924065	0.999148	NCOA7	17.6126	1.75968	1.97157e-69	2.87121e-68	MDH1B	44.2531	6.83606	0	0	CDS1	2.12535	0.657993	0.0335572	0.129899
XIST	38.0417	2.28101	0	0	TYROBP	-0.0448301	0.195781	0.964243	0.999049	KCNJ16	0.0827495	1.75553	0.934051	0.999148	CRABP2	17.5722	1.89423	4.02429e-69	5.83231e-68	DNAH10	44.2455	7.11108	0	0	ANXA1	2.12042	-0.0673916	0.0339705	0.130993
PLCB1	38.0405	2.36924	0	0	AL357153.2	-0.0453158	0.411373	0.963856	0.999049	TEKT4	0.0666211	0.703688	0.946883	0.999148	RPLP0	17.5346	1.36393	7.80294e-69	1.12542e-67	TTC25	44.2101	6.54429	0	0	CA2	2.08624	1.31564	0.036957	0.141755
C4orf3	37.9629	3.09052	0	0	AC015845.1	-0.0453265	0.342685	0.963847	0.999049	ADGB	0.0612632	0.54388	0.95115	0.999148	RIBC2	17.3629	1.75944	1.57524e-67	2.26111e-66	CATIP	44.1634	6.93558	0	0	RORA	2.0766	1.67377	0.0378382	0.144605
IFI6	37.8184	2.79987	0	0	LINC01705	-0.0453291	0.176267	0.963845	0.999049	SLCO5A1	0.0593314	0.657508	0.952688	0.999148	IDO1	17.2341	1.83604	1.47258e-66	2.10368e-65	DYNC2H1	44.0921	5.65406	0	0	MYO3B	2.03725	2.25743	0.0416252	0.157274
KLK10	37.7768	2.5826	0	0	SYCP2L	-0.0467598	0.497691	0.962705	0.999049	LINC02577	0.053417	1.08044	0.9574	0.999148	ACSL4	17.1784	1.89935	3.8535e-66	5.47891e-65	HSPH1	43.8296	4.80618	0	0	AC105450.1	2.02812	3.66121	0.042548	0.160156
CLIC3	37.6895	3.87716	0	0	AC131571.1	-0.0472482	0.56715	0.962315	0.999049	SCN4B	0.0521576	1.05292	0.958403	0.999148	TNFAIP8L1	17.1657	1.93984	4.79782e-66	6.78937e-65	CFAP69	43.8112	5.27753	0	0	EGR1	2.00973	0.612544	0.0444596	0.165894
RPS19	37.1325	1.6863	8.3904e-302	1.20436e-300	AC130324.2	-0.0472482	0.507558	0.962315	0.999049	LMNTD1	0.0469934	0.589907	0.962519	0.999148	NAV2	17.1645	1.7682	4.89859e-66	6.89942e-65	MGST3	43.8058	4.02847	0	0	HSPA5	1.97282	0.0846927	0.0485158	0.17991
EGR1	36.9443	2.62215	9.00176e-299	1.28597e-297	EDDM13	-0.0472855	0.426725	0.962286	0.999049	AC130456.2	0.045461	0.52284	0.96374	0.999148	NPC2	17.151	2.43046	6.17562e-66	8.65741e-65	ANKRD66	43.7964	6.98433	0	0	AHNAK2	1.94378	0.755466	0.0519223	0.189183
NDUFAF3	36.8697	2.54715	1.41467e-297	2.01137e-296	CD59	-0.0472882	0.317492	0.962284	0.999049	IFT57	0.0449655	-0.0747935	0.964135	0.999148	LDHA	17.1339	2.38428	8.29087e-66	1.15687e-64	RFX3	43.6401	5.27142	0	0	S100A14	1.92641	0.114343	0.0540538	0.195847
EIF4EBP1	36.7076	3.2797	5.52958e-295	7.82488e-294	LINC00907	-0.0481506	0.632731	0.961596	0.999049	AP003472.1	0.0344983	1.3311	0.97248	0.999148	CLDN4	17.088	2.04683	1.82396e-65	2.53328e-64	ARHGAP18	43.5633	4.93519	0	0	ADAMTS9-AS2	1.91671	1.95254	0.0552747	0.199788
PATJ	36.6627	2.19596	2.87439e-294	4.04843e-293	HCAR3	-0.0497889	-0.973651	0.960291	0.999049	RHAG	0.0338366	1.60024	0.973007	0.999148	SPIDR	17.0075	1.61686	7.22864e-65	9.9935e-64	HAGHL	43.4581	6.06559	0	0	HBEGF	1.89226	1.03745	0.0584561	0.210022
S100A4	36.6011	2.42746	2.74328e-293	3.84572e-292	AL355474.1	-0.0497889	-0.932192	0.960291	0.999049	GZMM	0.0338366	1.70087	0.973007	0.999148	HMGN3	16.967	2.05089	1.44154e-64	1.98376e-63	IQUB	43.3764	6.18937	0	0	OASL	1.88595	2.82713	0.0593023	0.2123
RXFP1	36.5196	2.37841	5.42394e-292	7.56828e-291	AC005920.1	-0.0497889	-1.04887	0.960291	0.999049	AL359555.1	0.0338366	1.82275	0.973007	0.999148	IL1B	16.9252	1.81011	2.93505e-64	4.02062e-63	CCNA1	43.2764	5.38514	0	0	LTB	1.84789	2.30682	0.0646187	0.230507
PGR	36.3552	2.56175	2.17461e-289	3.02029e-288	GNLY	-0.0497889	-1.00436	0.960291	0.999049	AC025539.1	0.0338305	1.46756	0.973012	0.999148	JMJD1C	16.8923	1.61809	5.12441e-64	6.98783e-63	DNAH5	43.2151	6.62662	0	0	TUBA1C	1.83902	0.0840626	0.0659129	0.234844
TUBB	36.327	3.24441	6.05467e-289	8.37052e-288	AC025539.1	-0.0497915	-1.15081	0.960289	0.999049	AC005920.1	0.0338244	1.34787	0.973017	0.999148	SNTB1	16.8207	1.86522	1.72207e-63	2.33765e-62	TMEM190	43.1488	6.74358	0	0	TXNIP	1.82193	-0.172513	0.068465	0.242211
CST3	36.1636	3.43643	2.27227e-286	3.12697e-285	RHAG	-0.0497968	-1.28465	0.960284	0.999049	AL133245.1	0.0338122	1.16669	0.973027	0.999148	PLEKHA5	16.7609	1.62019	4.71618e-63	6.37322e-62	LINC02166	43.0571	7.01988	0	0	METTL27	1.81653	0.822059	0.0692884	0.244835
SDC4	36.111	2.28172	1.52439e-285	2.08821e-284	AC025211.1	-0.0503159	-0.223375	0.959871	0.999049	AF107885.2	0.033803	1.09209	0.973034	0.999148	PTPRK	16.6675	1.58235	2.25831e-62	3.03809e-61	ZDHHC1	43.0524	5.3276	0	0	AL137800.1	1.80532	2.95621	0.0710252	0.250089
ITGB8	35.975	3.11668	2.05661e-283	2.80447e-282	BIRC6-AS1	-0.0503159	-0.213392	0.959871	0.999049	AC125618.2	0.0328501	0.981305	0.973794	0.999148	SORBS2	16.6644	1.78512	2.37896e-62	3.18611e-61	SYTL3	43.0199	5.46854	0	0	DHRS9	1.80289	1.34276	0.0714055	0.250839
RPLP1	35.9455	0.973726	5.95726e-283	8.08678e-282	ST8SIA6-AS1	-0.0503159	-0.211201	0.959871	0.999049	TUBAL3	0.032196	1.41425	0.974316	0.999148	TFPI2	16.5644	1.64433	1.26009e-61	1.68012e-60	CFAP57	42.987	6.5544	0	0	TNFRSF11B	1.78489	4.31487	0.0742789	0.259717
RPL31	35.875	1.44533	7.49866e-282	1.01333e-280	EMILIN3	-0.0503159	-0.26842	0.959871	0.999049	AL023754.1	0.032196	1.39879	0.974316	0.999148	CTPS2	16.5619	1.62677	1.31421e-61	1.74453e-60	ARL3	42.9637	4.19408	0	0	AC108752.1	1.76128	1.52796	0.0781917	0.269937
TFPI2	35.8398	2.38826	2.65051e-281	3.56571e-280	WEE2	-0.0503159	-0.238726	0.959871	0.999049	TMEM252-DT	0.0312689	0.956841	0.975055	0.999148	MDM2	16.5596	1.65551	1.36563e-61	1.8048e-60	LINC01091	42.8763	6.09501	0	0	NRP1	1.71729	2.63079	0.085927	0.291938
TSPAN12	35.7955	2.82188	1.29813e-280	1.73857e-279	ADAMTSL1	-0.0503212	-0.49365	0.959866	0.999049	AC011139.1	0.0282881	1.3621	0.977432	0.999148	PPP1R2	16.4501	1.66993	8.37715e-61	1.09744e-59	IQCK	42.8597	4.86188	0	0	TRIM29	1.71496	1.63358	0.086352	0.292172
SLC1A3	35.6511	2.32084	2.26537e-278	3.02049e-277	ANXA10	-0.0503225	-0.410612	0.959865	0.999049	XAGE2	0.0266521	1.30278	0.978737	0.999148	CAT	16.2156	1.80416	3.91435e-59	5.10567e-58	AC234582.1	42.77	7.06617	0	0	FOS	1.71484	0.437057	0.0863746	0.292172
RPL13A	35.5119	2.2345	3.22467e-276	4.28054e-275	DPP9-AS1	-0.0508349	0.120698	0.959457	0.999049	MEP1A	0.0257464	1.01528	0.97946	0.999148	IDI1	16.195	1.5907	5.46681e-59	7.09975e-58	C20orf85	42.724	6.80943	0	0	AC005062.1	1.70826	2.18711	0.0875888	0.295243
RMST	35.4565	2.28639	2.307e-275	3.0489e-274	AC008731.1	-0.0508349	0.00610762	0.959457	0.999049	AL109741.1	0.0242095	1.06651	0.980686	0.999148	PARD3	16.1607	1.51803	9.55264e-59	1.23526e-57	TRAF3IP1	42.5104	4.79586	0	0	HTR3A	1.70525	7.84451	0.0881481	0.296462
TMEM101	35.3972	3.24861	1.88501e-274	2.48027e-273	CYP4F26P	-0.0508349	0.156724	0.959457	0.999049	ENPEP	0.0236164	0.871821	0.981159	0.999148	EIF4G3	16.0967	1.54776	2.69049e-58	3.46415e-57	DZIP3	42.4404	5.32383	0	0	ZHX2	1.69279	1.18628	0.0904959	0.303
PTPRK	35.3694	2.16253	5.04436e-274	6.60833e-273	MPP7-DT	-0.0508402	-0.116109	0.959453	0.999049	BICRA-AS1	0.0194615	0.933431	0.984473	0.999148	ACTB	16.0177	1.59905	9.6161e-58	1.23283e-56	AKR7A2	42.4367	4.48607	0	0	FAM3D	1.69026	4.22445	0.0909777	0.304051
THSD7A	35.3689	2.92178	5.1303e-274	6.69169e-273	AC010326.3	-0.051346	0.242018	0.95905	0.999049	GRM5	0.0171851	0.899424	0.986289	0.999148	SNHG8	15.9295	2.63098	3.9573e-57	5.03047e-56	ARL6	42.4161	5.53354	0	0	SPX	1.69008	4.30387	0.0910126	0.304051
KIAA1217	35.3431	2.08255	1.28122e-273	1.66393e-272	CPNE4	-0.051346	0.158488	0.95905	0.999049	AL359813.1	0.0155643	1.07676	0.987582	0.999148	HLA-DRA	15.7533	1.93741	6.52095e-56	8.25436e-55	LRRC73	42.4057	6.33072	0	0	IFIT1	1.66463	1.09892	0.0959875	0.318542
LAMA3	35.2601	2.17386	2.40289e-272	3.10719e-271	AL445928.2	-0.0513486	0.175757	0.959048	0.999049	LINC02127	0.011655	1.17139	0.990701	0.999148	H2BC11	15.7408	2.61801	7.94484e-56	1.00145e-54	DNAI2	42.3928	7.03424	0	0	TCN1	1.65572	5.26418	0.0977795	0.323416
MACF1	35.2134	2.14616	1.24912e-271	1.60831e-270	SHANK2-AS1	-0.0513526	0.0752968	0.959045	0.999049	IL13RA2	0.011655	1.00956	0.990701	0.999148	KMT2C	15.6822	1.58163	2.00305e-55	2.51429e-54	ERICH2	42.198	5.33104	0	0	USP53	1.65133	0.50677	0.0986719	0.326009
GSTP1	35.1828	2.3145	3.66834e-271	4.703e-270	DSG3	-0.0514178	-0.445002	0.958993	0.999049	AC084757.4	0.011655	1.28333	0.990701	0.999148	RIMS2	15.6336	1.57608	4.29491e-55	5.36863e-54	KIF3A	42.119	5.22416	0	0	KLF2	1.65049	2.93001	0.0988431	0.326046
IL32	35.1358	3.02116	1.91632e-270	2.44637e-269	PRKCB	-0.0518597	0.2241	0.958641	0.999049	SOBP	0.0107477	1.01237	0.991425	0.999148	C6orf15	15.5206	1.72303	2.51821e-54	3.1347e-53	ARMC4	42.0838	6.73872	0	0	SERPINB4	1.64656	4.27504	0.0996479	0.328083
KRT18	34.9956	2.3577	2.62355e-268	3.33503e-267	AL139106.1	-0.0518597	0.101918	0.958641	0.999049	DNAH6	0.010609	0.459762	0.991535	0.999148	HSPH1	15.4819	1.54153	4.59946e-54	5.70181e-53	NEAT1	42.079	3.95503	0	0	APOL1	1.62615	0.491443	0.103917	0.339598
NCALD	34.7273	2.19472	3.05154e-264	3.86271e-263	MUC20	-0.0518703	0.125524	0.958632	0.999049	NNAT	0.0100113	0.958584	0.992012	0.999148	LRIG1	15.4519	2.39936	7.32396e-54	9.04192e-53	SSB	41.9816	3.88903	0	0	RAPGEF5	1.61221	1.22241	0.106917	0.347508
H1-10	34.7189	3.21447	4.08856e-264	5.15364e-263	AC004805.1	-0.0523681	0.237925	0.958235	0.999049	AL356805.1	0.0100052	0.891166	0.992017	0.999148	HSPA8	15.3576	2.21829	3.15065e-53	3.87375e-52	ATG9B	41.9163	6.73582	0	0	KRTAP2-3	1.60149	7.17849	0.109269	0.354386
BNIP3	34.6417	2.34007	5.95466e-263	7.47447e-262	SGSM1	-0.0528631	0.361679	0.957841	0.999049	AC007014.1	0.00991067	0.742212	0.992093	0.999148	OSBPL10	15.3358	1.50936	4.408e-53	5.39755e-52	LCA5L	41.7416	5.50873	0	0	TMEM40	1.56907	2.01136	0.11663	0.372621
RPS29	34.4414	2.59045	6.05914e-260	7.57393e-259	AC021231.1	-0.0536124	0.791834	0.957244	0.999049	TEX26	0.00916966	0.776717	0.992684	0.999148	CDK14	15.3078	1.91654	6.78176e-53	8.27044e-52	SPAG1	41.6962	4.53892	0	0	ATP10B	1.5677	4.98809	0.11695	0.373245
ERRFI1	34.3577	2.30969	1.07983e-258	1.34419e-257	FAM78B	-0.0568238	-1.05988	0.954686	0.999049	AL132990.1	0.00915746	1.01045	0.992694	0.999148	PCDH7	15.1737	1.60868	5.28073e-52	6.41384e-51	STX2	41.6896	5.80266	0	0	NTF3	1.55215	4.84084	0.120627	0.383349
SLC2A1	34.3061	2.37431	6.35452e-258	7.8775e-257	AL391117.1	-0.0568238	-1.18788	0.954686	0.999049	ENHO	0.0061065	1.01574	0.995128	0.999148	S100A14	15.1184	2.35811	1.22543e-51	1.48237e-50	EFHB	41.5625	6.82863	0	0	C10orf99	1.53649	4.95815	0.124418	0.3929
SELENOW	34.2393	3.50538	6.29637e-257	7.7733e-256	AC092747.1	-0.0568238	-1.04916	0.954686	0.999049	SLC38A4	0.0061065	0.824776	0.995128	0.999148	SF3B5	15.0229	2.25849	5.2012e-51	6.24144e-50	LINC01513	41.378	7.07067	0	0	SEMA3B	1.51985	0.0969855	0.128549	0.405092
TUBA1C	33.9708	2.61389	6.0233e-253	7.40569e-252	SIM2	-0.0568238	-1.224	0.954686	0.999049	AC011473.1	0.0061065	0.965467	0.995128	0.999148	PLOD2	14.9991	1.47657	7.44626e-51	8.8646e-50	SQLE	41.3567	4.61032	0	0	BACH2	1.5098	3.20036	0.131094	0.411813
DDIT4	33.9217	2.32632	3.18487e-252	3.89984e-251	TMEM178B	-0.0568238	-0.91783	0.954686	0.999049	AP001442.1	0.00610345	0.994679	0.99513	0.999148	UBE2E2	14.9458	1.51565	1.65893e-50	1.96711e-49	ARMC2	41.2569	5.64527	0	0	CDKN1C	1.4487	0.807259	0.147423	0.455008
IDI1	33.9058	2.08583	5.4743e-252	6.67598e-251	LINC02101	-0.0568238	-1.10409	0.954686	0.999049	SHISA6	0.0061004	0.729957	0.995133	0.999148	UBB	14.8874	2.29634	3.97978e-50	4.70053e-49	DNAH7	41.24	5.44126	0	0	PRUNE2	1.44307	0.942746	0.149001	0.457995
PREX2	33.8359	2.63725	5.85546e-251	7.1119e-250	LINC02319	-0.0568265	-1.17309	0.954683	0.999049	MYH15	0.00447657	0.976838	0.996428	0.999148	MACF1	14.8351	1.55178	8.69167e-50	1.02255e-48	CFAP61	41.215	6.41401	0	0	TNIK	1.43029	1.31511	0.152633	0.464872
NFAT5	33.7492	2.07489	1.09981e-249	1.33042e-248	AC011139.1	-0.0568291	-1.41506	0.954681	0.999049	ADAMTS3	0.00447657	0.864005	0.996428	0.999148	GPX3	14.8006	1.64981	1.45267e-49	1.70235e-48	LINC01765	41.085	7.41481	0	0	NHSL1	1.4289	0.551972	0.153032	0.465616
CBLB	33.7447	2.41758	1.27801e-249	1.53977e-248	CXXC4-AS1	-0.0568291	-1.27361	0.954681	0.999049	ACKR4	0.00446438	0.790573	0.996438	0.999148	RPL8	14.7929	1.32479	1.62745e-49	1.89974e-48	CCDC30	41.0757	5.28814	0	0	BCAS1	1.42262	2.65413	0.154846	0.469706
CLU	33.5803	3.03806	3.2552e-247	3.90624e-246	AC069368.1	-0.0568318	-1.60885	0.954679	0.999049	AL161618.1	0.00292746	0.803575	0.997664	0.999148	PLAUR	14.7325	1.54072	3.98593e-49	4.6348e-48	WDR38	40.9885	7.00766	0	0	RSRC1	1.4153	1.77878	0.156981	0.474742
SFN	33.4779	2.10289	1.00937e-245	1.20163e-244	ADTRP	-0.0573495	-0.338379	0.954267	0.999049	AL606516.1	0.00283445	0.827458	0.997738	0.999148	KLK10	14.7227	1.50206	4.61151e-49	5.34152e-48	BLCAP	40.9084	4.82152	0	0	SRGAP1	1.38667	1.5311	0.165543	0.495639
C6orf15	33.4656	2.7885	1.52415e-245	1.8073e-244	LINC02779	-0.0573495	-0.250209	0.954267	0.999049	AC012076.2	0.00281311	0.801733	0.997755	0.999148	USP53	14.7005	1.42252	6.40299e-49	7.38807e-48	C1orf87	40.8911	6.69334	0	0	MB21D2	1.36356	0.790196	0.172706	0.512481
CRABP2	33.2557	2.65389	1.68784e-242	1.99351e-241	Z98742.4	-0.0573495	-0.350315	0.954267	0.999049	IL2RA	0.00221084	0.910377	0.998236	0.999148	BCL2	14.6834	2.21878	8.24059e-49	9.47195e-48	CYSTM1	40.8768	3.8611	0	0	ACTG1	1.35365	-0.24325	0.175849	0.521291
SAT1	32.8531	2.42198	1.02927e-236	1.2109e-235	MAF	-0.0573495	-0.39603	0.954267	0.999049	AL355474.1	0.00220474	0.788899	0.998241	0.999148	CNTRL	14.671	1.6836	9.89055e-49	1.13251e-47	CALM1	40.758	2.94563	0	0	LRRN1	1.35224	4.72153	0.176298	0.522106
OXR1	32.3352	1.91922	2.24173e-229	2.62703e-228	AC009403.2	-0.0573495	-0.390833	0.954267	0.999049	AC090578.1	0.00219864	0.464992	0.998246	0.999148	RPLP2	14.6481	1.25134	1.38624e-48	1.58126e-47	NEK5	40.6769	5.99289	0	0	KRT6A	1.33	1.74753	0.183519	0.536605
PECAM1	32.0545	3.09954	1.90049e-225	2.21847e-224	TF	-0.0573495	-0.32848	0.954267	0.999049	BANCR	0.000564146	0.77042	0.99955	0.99955	CD8B	14.6306	2.02716	1.79259e-48	2.03704e-47	SAMHD1	40.6602	4.80374	0	0	PFN1	1.30885	-0.0283233	0.190584	0.552951
MT2A	32.0512	2.52661	2.11108e-225	2.45474e-224	AC016526.2	-0.0573495	-0.429559	0.954267	0.999049	AL033529.1	0.000564146	0.857934	0.99955	0.99955	DPY30	14.6106	1.90505	2.40399e-48	2.7215e-47	AL357093.2	40.6491	6.52947	0	0	PRDX5	1.30524	-0.259751	0.191811	0.555439
MMP7	31.9668	2.68228	3.15663e-224	3.65633e-223	AC007610.3	-0.0573521	-0.431916	0.954265	0.999049	IL23R	-0.00190285	0.875827	0.998482	0.999148	GON7	14.6043	1.45749	2.63687e-48	2.97391e-47	FAM227A	40.6339	6.00598	0	0	GRIP1	1.29964	1.04522	0.193725	0.5599
CD74	31.8553	2.65688	1.11052e-222	1.28137e-221	SHISA6	-0.0573575	-0.67789	0.95426	0.999049	AC002072.1	-0.0027262	0.609794	0.997825	0.999148	FNDC3B	14.5825	1.42233	3.62895e-48	4.07747e-47	ADGB	40.6107	6.67288	0	0	LRRC31	1.29616	6.45508	0.194922	0.562816
CTPS2	31.7266	2.05194	6.68501e-221	7.68392e-220	SLC38A4	-0.0573628	-0.62972	0.954256	0.999049	LINC02202	-0.00333608	0.591587	0.997338	0.999148	SH3BGRL3	14.5646	2.14173	4.71749e-48	5.28077e-47	STOX1	40.4111	6.00524	0	0	SLC5A1	1.29221	4.25069	0.196286	0.565122
PPP1R2	31.6417	1.86648	9.8518e-220	1.12807e-218	AL031848.1	-0.0578672	-0.154137	0.953854	0.999049	CAPN14	-0.00333608	0.547824	0.997338	0.999148	ITIH5	14.5549	1.66484	5.43996e-48	6.06686e-47	CCDC138	40.3387	5.29653	0	0	CRABP2	1.27517	0.694135	0.202248	0.577851
BIRC3	31.4036	2.26797	1.80956e-216	2.06414e-215	IL12RB2	-0.0578672	-0.0579065	0.953854	0.999049	AC069368.1	-0.00333608	0.699635	0.997338	0.999148	RPL12	14.4879	2.35081	1.44593e-47	1.60659e-46	SPATA4	40.1643	6.52671	0	0	S100A8	1.27359	6.25538	0.202808	0.578901
S100A6	31.271	1.41355	1.15596e-214	1.31359e-213	AC010327.7	-0.0578672	-0.0723758	0.953854	0.999049	CXXC4-AS1	-0.00333608	0.688959	0.997338	0.999148	NFKBIZ	14.4844	1.49709	1.52023e-47	1.68292e-46	PERP	40.1127	3.81151	0	0	TFF2	1.24231	1.30348	0.214123	0.606359
ZFAND3	31.2551	1.79385	1.9035e-214	2.15491e-213	GASK1A	-0.0578725	-0.190713	0.95385	0.999049	TMEM178B	-0.00334218	0.657876	0.997333	0.999148	CXCL2	14.3826	1.73013	6.65843e-47	7.34386e-46	IGFBP7	40.0969	5.29622	0	0	PIP	1.24062	2.73968	0.214746	0.607198
PGK1	31.1091	2.94741	1.81469e-212	2.04664e-211	AC017050.1	-0.0578752	-0.183448	0.953848	0.999049	SIM2	-0.00334218	0.656661	0.997333	0.999148	TGFBR2	14.3182	1.57011	1.68327e-46	1.84974e-45	CFAP47	40.0792	6.39693	0	0	ADGRF4	1.22537	3.9145	0.220434	0.618618
REV3L	31.0757	1.87333	5.13632e-212	5.77114e-211	AC092653.1	-0.0583769	0.0151141	0.953448	0.999049	LINC02101	-0.00334218	0.651304	0.997333	0.999148	PLA2G4A	14.2815	1.445	2.85241e-46	3.12308e-45	IFT88	40.0776	4.42629	0	0	GJB4	1.21843	3.89426	0.22306	0.624818
TSHZ2	30.9478	1.88281	2.71566e-210	3.03992e-209	AC027243.4	-0.0583769	0.117695	0.953448	0.999049	AC008937.2	-0.00499345	0.629179	0.996016	0.999148	SEMA3B	14.2695	2.03263	3.38809e-46	3.6961e-45	SPACA9	39.7714	5.15854	0	0	ABCA4	1.214	4.07589	0.224747	0.62833
LTF	30.7199	3.0186	3.08461e-207	3.44008e-206	LY86	-0.0583796	0.0801918	0.953446	0.999049	AC079336.4	-0.00591286	0.643741	0.995282	0.999148	ARHGAP26	14.2652	1.50021	3.60663e-46	3.92025e-45	IL5RA	39.7453	6.82436	0	0	CLDN16	1.2124	1.26486	0.225361	0.62833
SLC7A2	30.5627	2.1461	3.8335e-205	4.25944e-204	TUBA8	-0.0583796	0.104204	0.953446	0.999049	ATP8A2	-0.00661118	0.798932	0.994725	0.999148	CDKN1A	14.2395	1.44755	5.2064e-46	5.6387e-45	C4orf3	39.601	3.84214	0	0	SLC35F3	1.1717	1.11618	0.241316	0.666619
BTG3	30.3317	2.04183	4.38321e-202	4.85226e-201	AC008277.1	-0.0583849	-0.0714292	0.953442	0.999049	AC004053.1	-0.00662033	0.623412	0.994718	0.999148	MT1E	14.0439	1.43587	8.3973e-45	9.02935e-44	CITED2	39.5581	4.57188	0	0	AL079338.1	1.13673	1.06056	0.25565	0.696915
TRIB3	30.1298	2.21275	1.97463e-199	2.1779e-198	LINC00923	-0.0608536	0.332873	0.951476	0.999049	ANK2-AS1	-0.00663558	0.680032	0.994706	0.999148	VTI1A	14.0101	1.6088	1.35166e-44	1.44821e-43	DYNLT1	39.55	3.49142	0	0	ADCY9	1.13645	0.934037	0.255768	0.696915
AKAP9	29.9652	1.82273	2.78835e-197	3.06412e-196	IL10RA	-0.0638587	-1.22127	0.949083	0.999049	AL356421.2	-0.00824415	0.619768	0.993422	0.999148	MIR924HG	13.9986	2.78291	1.59017e-44	1.69769e-43	NME9	39.5237	6.51782	0	0	SERPINB3	1.12415	1.73215	0.260948	0.707816
IDO1	29.9287	2.2496	8.33692e-197	9.12802e-196	LINC01322	-0.0638587	-1.14015	0.949083	0.999049	AC008632.1	-0.00888606	0.541328	0.99291	0.999148	EYA2	13.9169	1.68501	4.99827e-44	5.31731e-43	C15orf65	39.4031	5.40067	0	0	PLA2G2F	1.10614	8.9751	0.268666	0.72678
USP53	29.8133	1.85527	2.62893e-195	2.86793e-194	TCF4-AS1	-0.0638587	-1.14937	0.949083	0.999049	IL10RA	-0.00888911	0.50444	0.992908	0.999148	NF1	13.8714	1.32823	9.44373e-44	1.0011e-42	ARMH1	39.3606	6.35703	0	0	LINC01705	1.08173	5.41958	0.279372	0.748589
NF1	29.5334	1.81831	1.07371e-191	1.16708e-190	AL359704.3	-0.0638587	-1.23539	0.949083	0.999049	AP002075.1	-0.00890131	0.310411	0.992898	0.999148	LAMA3	13.8469	1.40226	1.32745e-43	1.40224e-42	IFT172	39.3579	5.21399	0	0	PAG1	1.0815	3.2373	0.279473	0.748589
PLEKHA5	29.3869	1.84725	8.07374e-190	8.74412e-189	AL592528.1	-0.0638587	-1.37426	0.949083	0.999049	IDH2-DT	-0.0105389	0.413167	0.991591	0.999148	ASAP1	13.8018	1.5406	2.48629e-43	2.608e-42	CFAP54	39.2665	5.53733	0	0	ANKRD2	1.07624	3.22259	0.281821	0.752192
PCCA	29.3784	2.20801	1.03583e-189	1.1178e-188	AC008632.1	-0.0638614	-1.38685	0.949081	0.999049	AC020978.3	-0.0105389	0.535174	0.991591	0.999148	APOLD1	13.6919	3.46535	1.13555e-42	1.18698e-41	TMC5	39.2006	4.99385	0	0	CDKN2A	1.0673	0.617216	0.285836	0.761552
NDRG1	29.124	2.16951	1.78543e-186	1.91982e-185	MEF2C	-0.0643831	-0.444151	0.948665	0.999049	NELL2	-0.0121612	0.71883	0.990297	0.999148	USP13	13.6682	2.07727	1.57285e-42	1.63839e-41	TAGLN2	39.1841	2.70897	0	0	CCL20	1.04333	0.415317	0.296797	0.786565
SPIDR	29.0758	1.7696	7.27012e-186	7.78942e-185	AL451049.1	-0.0643831	-0.568976	0.948665	0.999049	F5	-0.0121673	0.613798	0.990292	0.999148	KIAA1217	13.6622	1.37634	1.70763e-42	1.77263e-41	LRRC34	39.1294	7.00686	0	0	SNTB1	1.02824	0.377631	0.303836	0.802384
SLC7A11	29.0299	1.83008	2.76149e-185	2.94821e-184	AC010834.2	-0.0643831	-0.484229	0.948665	0.999049	LINC01995	-0.0138018	0.552014	0.988988	0.999148	NUDC	13.614	1.77648	3.30469e-42	3.40689e-41	PLEKHS1	39.1143	4.71218	0	0	GAN	1.0217	1.2634	0.306921	0.809819
LIF	28.9836	2.21312	1.05899e-184	1.12658e-183	CLMP	-0.0643831	-0.481165	0.948665	0.999049	CFAP47	-0.014375	0.531349	0.988531	0.999148	STX18	13.5616	2.06714	6.76877e-42	6.95422e-41	NEK10	39.0964	6.19175	0	0	AKAP13	1.00832	0.389826	0.313303	0.823759
SYNE2	28.9763	2.02909	1.30758e-184	1.38613e-183	AC009950.1	-0.0643831	-0.401754	0.948665	0.999049	AC113143.3	-0.0144299	0.634781	0.988487	0.999148	SCD	13.5283	2.08414	1.06468e-41	1.09012e-40	SPATA6L	39.0809	5.16983	0	0	SMCO2	1.00541	3.67153	0.314701	0.824545
IER3	28.8454	1.97503	5.79413e-183	6.12056e-182	AC019186.1	-0.0643831	-0.464198	0.948665	0.999049	EFCAB8	-0.014436	0.426367	0.988482	0.999148	BRAF	13.4063	1.41249	5.55633e-41	5.66973e-40	SPATS2L	39.0004	4.11836	0	0	IL17C	1.00541	0.790794	0.314701	0.824545
MAML2	28.8153	1.75012	1.3798e-182	1.45242e-181	AC110058.1	-0.0643831	-0.525038	0.948665	0.999049	BX284613.2	-0.0144391	0.346212	0.98848	0.999148	SNHG29	13.4022	2.52999	5.87261e-41	5.97215e-40	LRRC71	38.9736	7.00526	0	0	RIN2	1.00452	0.450585	0.315127	0.824573
RCAN1	28.8142	2.2219	1.42552e-182	1.49531e-181	AC005998.1	-0.0643857	-0.567451	0.948663	0.999049	LINC02240	-0.0145687	0.705743	0.988376	0.999148	SPAG1	13.3987	1.29763	6.15687e-41	6.24007e-40	CFAP161	38.9041	6.5514	0	0	HTR3B	1.00238	7.19335	0.316159	0.826198
TPI1	28.7278	2.97689	1.71765e-181	1.79545e-180	AL136115.2	-0.0643857	-0.457323	0.948663	0.999049	H1-8	-0.0160751	0.53874	0.987174	0.999148	RERE	13.3772	1.26147	8.21435e-41	8.29733e-40	ZNF440	38.8079	5.12629	0	0	TAGAP	0.99222	5.92312	0.32109	0.835394
PTMA	28.6535	2.18493	1.45161e-180	1.5121e-179	AP003392.1	-0.0643857	-0.484788	0.948663	0.999049	AC113385.1	-0.0160843	0.475434	0.987167	0.999148	BICD1	13.3569	1.36126	1.08009e-40	1.08733e-39	CCDC187	38.6349	6.75679	0	0	SPRR1B	0.991377	6.67983	0.321502	0.835394
TNFSF10	28.5772	2.22066	1.28888e-179	1.33793e-178	WFDC1	-0.0643884	-0.654403	0.948661	0.999049	CD36	-0.0199799	0.278674	0.984059	0.999148	ETV6	13.2754	1.3028	3.21384e-40	3.22458e-39	AGBL2	38.6202	6.43751	0	0	UBE2E2	0.965311	0.353702	0.334389	0.86035
HMGN3	28.5437	2.21744	3.35893e-179	3.47475e-178	C12orf40	-0.0648994	-0.100082	0.948254	0.999049	ANXA10	-0.0199814	0.317929	0.984058	0.999148	PTX3	13.2588	2.24954	4.01184e-40	4.01184e-39	TTLL9	38.5589	6.63162	0	0	GAB1	0.96358	0.829134	0.335257	0.860806
ANK3	28.5317	1.68293	4.73233e-179	4.87869e-178	AC008667.1	-0.0648994	-0.227666	0.948254	0.999049	CNN1	-0.0201171	0.697826	0.98395	0.999148	CALB1	13.2275	2.00923	6.08446e-40	6.04416e-39	C12orf75	38.479	4.26733	0	0	HNF4G	0.948934	0.805863	0.342654	0.874861
THSD4	28.53	2.12824	4.97658e-179	5.11293e-178	AL034351.4	-0.0648994	-0.129597	0.948254	0.999049	CWH43	-0.0201232	0.631424	0.983945	0.999148	NFAT5	13.1774	1.2673	1.18442e-39	1.17269e-38	CCDC34	38.2398	4.41469	0	0	MIR34AHG	0.939338	1.08866	0.347557	0.884743
ZFPM2-AS1	28.4452	1.8006	5.59121e-178	5.72479e-177	CCDC194	-0.0648994	-0.224557	0.948254	0.999049	SLC22A17	-0.0209374	0.521514	0.983296	0.999148	MGLL	13.1488	1.9511	1.72886e-39	1.70611e-38	DCDC1	37.9273	5.70974	0	0	COX6B2	0.935832	2.18362	0.34936	0.888202
ALKAL2	28.4101	2.72404	1.51831e-177	1.5493e-176	ZNF469	-0.0648994	-0.0692102	0.948254	0.999049	AC092115.3	-0.0216205	0.380344	0.982751	0.999148	UBXN11	13.121	1.31007	2.49468e-39	2.45378e-38	STMND1	37.8287	6.70622	0	0	MYLK	0.911492	0.870989	0.362036	0.915003
FTH1	28.3778	0.434786	3.80236e-177	3.86681e-176	FAM85B	-0.0649074	-0.296422	0.948248	0.999049	FAM85B	-0.0216358	0.351932	0.982739	0.999148	TPI1	13.1053	2.07796	3.06974e-39	3.00955e-38	CERKL	37.7218	6.5157	0	0	SERPINA1	0.903484	-0.241622	0.366269	0.922592
TBC1D5	28.3177	1.86957	2.08998e-176	2.11822e-175	AL117350.2	-0.0649101	-0.340996	0.948246	0.999049	CDKL4	-0.021651	0.10046	0.982726	0.999148	SPATA5	13.0964	2.46016	3.45139e-39	3.37269e-38	PCSK1N	37.7029	5.83036	0	0	THRB	0.900954	0.811269	0.367613	0.92365
ARL3	28.2174	2.11325	3.57352e-175	3.60961e-174	FCER1G	-0.0654105	-0.052758	0.947847	0.999049	MARCHF4	-0.0225125	0.649444	0.982039	0.999148	METTL15	13.0481	1.29072	6.51335e-39	6.34417e-38	CCDC17	37.6439	6.69299	4.1156539307539e-310	4.1156539307539e-309	DLGAP1	0.898607	0.715499	0.368862	0.925654
FBXO32	28.1697	3.04257	1.37555e-174	1.38478e-173	AC116158.3	-0.0654132	0.0625926	0.947845	0.999049	AC015853.3	-0.0232794	0.341981	0.981427	0.999148	ERO1A	13.0448	1.65547	6.80204e-39	6.60392e-38	C8orf34	37.6381	5.30488	5.12180907360717e-310	5.08788980821904e-309	MTCL1	0.884208	2.28483	0.376584	0.940053
OSBPL10	28.1278	1.84494	4.47667e-174	4.49165e-173	GMFG	-0.0654158	0.00871496	0.947843	0.999049	AC004917.1	-0.0248834	0.457837	0.980148	0.999148	PATJ	13.0353	1.26593	7.70512e-39	7.43259e-38	PTGES3	37.5535	3.42244	1.23333957264021e-308	1.22113e-307	FGF2	0.88409	3.31934	0.376648	0.940053
SRI	28.126	2.2341	4.71162e-174	4.71162e-173	MAP3K5-AS1	-0.0659082	0.145233	0.947451	0.999049	AL590006.1	-0.0248956	0.409632	0.980138	0.999148	TBC1D5	13.0124	1.27651	1.04015e-38	1.00014e-37	RRAD	37.5444	6.13038	1.738111962603251e-308	1.71524e-307	KRT13	0.860164	1.9269	0.389699	0.967795
CXCL5	28.0885	1.99876	1.3525e-173	1.34801e-172	AC027018.1	-0.0659082	0.204853	0.947451	0.999049	SLC38A8	-0.0255299	0.16179	0.979632	0.999148	HMGA2	13.0007	1.34459	1.21181e-38	1.16148e-37	EFCAB12	37.3873	6.4325	6.27285e-306	6.17002e-305	TANC2	0.857807	0.474842	0.390999	0.969419
KRT5	28.0057	1.98414	1.3843e-172	1.37513e-171	CC2D2B	-0.0659136	0.10074	0.947447	0.999049	DIRC3	-0.025539	-0.111242	0.979625	0.999148	COP1	13.0005	1.35314	1.21594e-38	1.16173e-37	CTSS	37.3281	5.17995	5.74011e-305	5.62756e-304	AC005699.1	0.845311	3.75018	0.397937	0.983628
PITPNC1	27.7562	2.00866	1.46701e-169	1.45248e-168	ANGPTL1	-0.0659189	0.0293404	0.947442	0.999049	AP002961.1	-0.0255421	-0.102576	0.979623	0.999148	VIM	12.8735	1.9318	6.34237e-38	6.04036e-37	C11orf88	37.0895	6.1931	4.14999e-301	4.04219e-300	ATXN1	0.845124	0.302292	0.398042	0.983628
CYSTM1	27.7408	2.56185	2.24882e-169	2.21923e-168	NLRP10	-0.0659295	-0.0565734	0.947434	0.999049	ARHGEF3-AS1	-0.0255543	-0.153036	0.979613	0.999148	GAPDH	12.8061	0.479464	1.51598e-37	1.43922e-36	AC130456.2	37.0464	6.27615	2.04971e-300	1.99001e-299	AC091212.1	0.834502	3.89861	0.403998	0.994253
HMGA2	27.5967	2.03464	1.21899e-167	1.19901e-166	AC004494.1	-0.0664007	0.198333	0.947059	0.999049	LRP1B	-0.0256747	0.608908	0.979517	0.999148	DDIT4L	12.733	1.36265	3.87818e-37	3.6702e-36	C11orf49	37.0109	4.05429	7.65602e-300	7.40905e-299	CALM1	0.830207	-0.229062	0.406422	0.997762
MACC1	27.4042	1.76396	2.44139e-165	2.39352e-164	AC007656.2	-0.0678939	0.235121	0.94587	0.999049	ENTPD1	-0.0271751	0.312448	0.97832	0.999148	IFT88	12.6049	1.20363	1.98381e-36	1.87152e-35	ELF3	36.9613	4.54077	4.79141e-299	4.62194e-298	TENM3	0.823032	1.64469	0.41049	0.99998
RPS3	27.1877	1.40181	9.08556e-163	8.8784e-162	AL078602.1	-0.0708937	-1.41558	0.943482	0.999049	AL133464.1	-0.0287867	0.551018	0.977035	0.999148	RPS19	12.5794	1.10419	2.7422e-36	2.57887e-35	KIAA1211L	36.915	4.75743	2.65411e-298	2.55203e-297	CA3	0.822791	1.70114	0.410627	0.99998
AL049828.1	27.1542	1.57786	2.25636e-162	2.19776e-161	PRSS56	-0.0708937	-1.38277	0.943482	0.999049	TAGLN3	-0.0287989	0.424478	0.977025	0.999148	AKR7A2	12.4149	1.28564	2.16997e-35	2.03435e-34	FAM166B	36.6479	6.24974	4.93448e-294	4.71447e-293	LY6D	0.794314	2.06962	0.427013	0.99998
TGM2	27.0051	2.19339	1.28654e-160	1.24906e-159	GLIS1	-0.0708937	-1.36318	0.943482	0.999049	AC013762.1	-0.0294179	-0.255182	0.976531	0.999148	HLA-A	12.4032	2.26865	2.51019e-35	2.34597e-34	AKAP14	36.59	6.42047	4.129e-293	3.93238e-292	LINC02154	0.790704	5.66381	0.429117	0.99998
RALGAPA2	26.8775	1.65381	4.02066e-159	3.89096e-158	LINC01433	-0.0708937	-1.41026	0.943482	0.999049	HCAR3	-0.029421	-0.558511	0.976529	0.999148	RFX7	12.358	1.45734	4.40912e-35	4.10787e-34	CNTRL	36.4957	4.88294	1.29697e-291	1.2313e-290	SAMD12	0.788253	0.674011	0.430549	0.99998
MGST3	26.7598	2.58652	9.49793e-158	9.16199e-157	INKA2-AS1	-0.0708963	-1.45221	0.94348	0.999049	AC093382.1	-0.029421	-0.605551	0.976529	0.999148	PIBF1	12.3477	1.19485	5.01268e-35	4.65574e-34	NUCB2	36.4482	4.01904	7.35808e-291	6.96348e-290	DSG3	0.785358	5.74048	0.432243	0.99998
CXCL3	26.739	1.83909	1.65833e-157	1.59455e-156	RGS9BP	-0.070899	-1.53829	0.943478	0.999049	CNR2	-0.029421	-0.433918	0.976529	0.999148	ESR1	12.3295	1.33491	6.28243e-35	5.81706e-34	MAK	36.044	5.11628	1.70987e-284	1.603e-283	MASP1	0.770378	2.82734	0.441076	0.99998
STMN1	26.7386	2.01488	1.67577e-157	1.60617e-156	AC104938.1	-0.0714167	-0.533341	0.943066	0.999049	GNLY	-0.029421	-0.341066	0.976529	0.999148	CXCL1	12.3026	1.3391	8.76627e-35	8.09194e-34	ATP5IF1	36.0351	3.16167	2.36392e-284	2.20927e-283	AC114778.2	0.76876	2.80415	0.442036	0.99998
CD24	26.6335	2.26585	2.77723e-156	2.6534e-155	ZPBP	-0.0714193	-0.595585	0.943064	0.999049	PEX5L	-0.029424	-0.627178	0.976526	0.999148	IFT81	12.2621	1.17603	1.44694e-34	1.33154e-33	MAP1A	35.8933	6.40443	3.88849e-282	3.6116e-281	PARD3	0.76804	0.202659	0.442463	0.99998
CDKN1C	26.6311	2.72282	2.95943e-156	2.8185e-155	AC011676.3	-0.0714193	-0.639656	0.943064	0.999049	AC121154.1	-0.029424	-0.416783	0.976526	0.999148	EHBP1	12.2192	1.49724	2.45512e-34	2.2524e-33	CCDC181	35.8791	6.4019	6.46616e-282	5.98719e-281	TMSB10	0.76449	-0.0481368	0.444575	0.99998
PLOD2	26.6209	1.63304	3.88832e-156	3.69144e-155	ESRRB	-0.0714193	-0.645965	0.943064	0.999049	AL157912.1	-0.0310707	0.241364	0.975213	0.999148	SPDEF	12.1812	1.31467	3.91427e-34	3.58013e-33	RGCC	35.8454	4.71175	2.16711e-281	2.00041e-280	ANGPTL4	0.751077	0.851156	0.452606	0.99998
TM4SF1	26.5198	1.75633	5.72597e-155	5.4189e-154	AC008937.2	-0.071422	-0.677918	0.943062	0.999049	AC005993.1	-0.0310707	0.0985981	0.975213	0.999148	UTRN	12.1566	1.19794	5.29327e-34	4.82669e-33	PIH1D3	35.7804	6.50204	2.22553e-280	2.04803e-279	AL451069.2	0.746348	3.90984	0.455457	0.99998
JMJD1C	26.4673	1.59488	2.30943e-154	2.1787e-153	STRA8	-0.0719317	-0.205955	0.942656	0.999049	AC008079.1	-0.0310738	0.247677	0.975211	0.999148	HSPA5	12.1419	2.10597	6.33515e-34	5.75923e-33	OMG	35.6918	5.92864	5.2898e-279	4.85303e-278	LINC01226	0.725248	3.53122	0.4683	0.99998
ALPP	26.2824	2.82627	3.04487e-152	2.86352e-151	AL078590.2	-0.0719317	-0.119794	0.942656	0.999049	WFDC1	-0.0310768	-0.00121514	0.975208	0.999148	SORL1	12.1384	1.89857	6.60948e-34	5.99047e-33	ANAPC4	35.68	4.12531	8.06831e-279	7.37955e-278	ZBTB20	0.70217	0.460786	0.482573	0.99998
NCOA7	26.2639	1.77291	4.96036e-152	4.65034e-151	OBI1-AS1	-0.0719317	-0.203081	0.942656	0.999049	AC004771.1	-0.0310768	0.03654	0.975208	0.999148	CFAP36	12.0563	1.53546	1.79678e-33	1.6236e-32	MDM2	35.4629	3.84736	1.83701e-275	1.66497e-274	MAML3	0.695784	0.514133	0.486564	0.99998
PFN1	25.7429	2.59703	3.86967e-146	3.61652e-145	AC016576.1	-0.0719317	-0.101249	0.942656	0.999049	AL136115.2	-0.0310799	0.126858	0.975206	0.999148	SPAG16	12.012	1.26535	3.07479e-33	2.77008e-32	SAMD15	35.4451	5.59789	3.4558e-275	3.12271e-274	LINC02408	0.695779	6.58774	0.486567	0.99998
QPRT	25.7132	1.69144	8.31364e-146	7.74563e-145	C9orf153	-0.0719344	-0.319402	0.942654	0.999049	CLMP	-0.0310829	0.0398471	0.975203	0.999148	MSLN	11.9876	1.19989	4.12934e-33	3.70899e-32	CFAP74	35.4194	6.18943	8.57918e-275	7.729e-274	KYNU	0.692964	0.657944	0.488332	0.99998
STC1	25.3591	2.06342	7.13003e-142	6.62232e-141	AC005050.3	-0.0719397	-0.236373	0.94265	0.999049	AC110058.1	-0.0310829	-0.000731843	0.975203	0.999148	AF117829.1	11.9757	1.29134	4.76368e-33	4.26599e-32	RP1	35.1803	5.94765	4.00123e-271	3.59392e-270	AC114267.1	0.69	5.61537	0.490194	0.99998
UBE2E2	25.2437	1.77164	1.32839e-140	1.22621e-139	AL691420.1	-0.0724388	-0.120088	0.942253	0.999049	SRPX2	-0.0327083	0.462035	0.973907	0.999148	AKAP9	11.9501	1.25307	6.48411e-33	5.78939e-32	PIBF1	35.0353	3.93135	6.53802e-269	5.83752e-268	RGS17	0.686242	3.29794	0.49256	0.99998
SSB	25.1084	2.40445	4.02532e-139	3.70428e-138	AC096746.1	-0.0724388	0.0791054	0.942253	0.999049	AKR1B10	-0.0332084	0.755102	0.973508	0.999148	PTPRM	11.9283	1.16137	8.42689e-33	7.50169e-32	LNC-LBCS	35.0045	4.66429	1.9248e-268	1.71347e-267	AL357507.1	0.677445	0.89388	0.498123	0.99998
CDC42BPA	25.0717	1.63784	1.01168e-138	9.2815e-138	AL589740.1	-0.0724414	-0.0535064	0.942251	0.999049	LINC00326	-0.034236	0.596437	0.972689	0.999148	CFTR	11.8648	1.40011	1.80355e-32	1.60078e-31	LRRC49	34.9596	4.44998	9.25677e-268	8.21606e-267	SYT14	0.666074	0.511615	0.505364	0.99998
PDZK1IP1	25.0454	1.96059	1.95868e-138	1.79148e-137	PTPRD	-0.0724441	-0.0630273	0.942248	0.999049	AC018653.1	-0.0343367	0.444512	0.972609	0.999148	HMGCR	11.833	1.31012	2.63439e-32	2.33131e-31	STOML3	34.9102	6.26431	5.20647e-267	4.60749e-266	RHCG	0.666064	4.71255	0.50537	0.99998
AKR7A2	25.0008	1.51747	5.98799e-138	5.46017e-137	CHURC1-FNTB	-0.0751364	0.61185	0.940106	0.999049	LINC00462	-0.0349664	-0.408857	0.972107	0.999148	SCAF8	11.8259	1.46069	2.8672e-32	2.52988e-31	TRIM55	34.857	5.97791	3.33791e-266	2.94521e-265	TRIB3	0.661454	0.160014	0.508321	0.99998
KRT8	24.8658	2.23591	1.74512e-136	1.58647e-135	GZMM	-0.0773989	-21.5622	0.938306	0.999049	LINC02319	-0.0349664	-0.487233	0.972107	0.999148	TMCC1	11.8173	1.21781	3.17622e-32	2.79433e-31	TFF3	34.8485	4.7018	4.49161e-266	3.94001e-265	TRIO	0.656666	0.26722	0.511396	0.99998
AF117829.1	24.5414	1.93312	5.34145e-133	4.8412e-132	AL359555.1	-0.0773989	-21.4154	0.938306	0.999049	CRB2	-0.0349694	-0.440877	0.972104	0.999148	TSHZ2	11.776	1.12557	5.18813e-32	4.55099e-31	FRMPD2	34.7067	6.33123	6.2528e-264	5.46892e-263	PCSK1N	0.649126	0.229175	0.516257	0.99998
ITGA3	24.5109	1.48329	1.13009e-132	1.02116e-131	IL2RA	-0.0773989	-21.468	0.938306	0.999049	AC092747.1	-0.0349694	-0.407522	0.972104	0.999148	WDPCP	11.7573	1.26139	6.48032e-32	5.66792e-31	G0S2	34.6186	4.15855	1.32544e-262	1.15255e-261	TIMP1	0.645886	-0.280969	0.518353	0.99998
PPP1R9A	24.3726	1.76455	3.34381e-131	3.01244e-130	INE2	-0.0779286	-1.47005	0.937885	0.999049	COL10A1	-0.0349725	-0.477108	0.972102	0.999148	H2AC6	11.7312	1.26244	8.81613e-32	7.68848e-31	IQCH	34.6013	5.22834	2.41738e-262	2.096e-261	AL078604.4	0.639214	1.89279	0.522684	0.99998
GLRX	24.3251	1.76356	1.06314e-130	9.54913e-130	AC004471.1	-0.0779286	-1.31608	0.937885	0.999049	DNAH8	-0.0349725	-0.719928	0.972102	0.999148	DMGDH	11.6972	1.4986	1.31684e-31	1.14508e-30	COBL	34.5225	4.14357	3.69162e-261	3.1916e-260	CXCL2	0.627799	0.22841	0.530136	0.99998
KLK7	24.3231	1.92791	1.11753e-130	1.00077e-129	LINC00881	-0.0779286	-1.32436	0.937885	0.999049	LINC01344	-0.0349755	-0.818668	0.972099	0.999148	ATG7	11.6931	1.38991	1.38306e-31	1.19918e-30	CHST6	34.5116	4.12489	5.36958e-261	4.62895e-260	NR3C2	0.627409	1.3836	0.530391	0.99998
JUN	24.2749	1.72092	3.61129e-130	3.22436e-129	LINC02506	-0.0779312	-1.48216	0.937883	0.999049	SLC5A10	-0.0359651	0.351069	0.97131	0.999148	MAP3K5	11.6459	1.16213	2.40814e-31	2.08196e-30	HSP90AA1	34.4696	2.60496	2.28723e-260	1.9661e-259	L3MBTL4	0.6245	0.466937	0.532299	0.99998
PLEKHS1	24.2447	1.56222	7.52332e-130	6.69731e-129	AC018690.1	-0.0779312	-1.50348	0.937883	0.999049	AL360227.1	-0.0366176	0.18254	0.97079	0.999148	CXCL8	11.5932	1.2949	4.46255e-31	3.84703e-30	TXN	34.2386	2.74234	6.45383e-257	5.53185e-256	FRMD5	0.621349	0.674941	0.53437	0.99998
PSAT1	24.2076	2.79762	1.84845e-129	1.64064e-128	CD36	-0.0779312	-1.5342	0.937883	0.999049	KLHL30	-0.0366207	-0.0103956	0.970787	0.999148	C3	11.5834	2.06544	4.99953e-31	4.29759e-30	NDUFAF3	33.9386	3.537	1.79723e-252	1.53173e-251	DUOX2	0.611841	2.3057	0.540643	0.99998
IFI27	24.1959	1.23517	2.45569e-129	2.17318e-128	AL359844.1	-0.0784503	-0.630678	0.93747	0.999049	AC004540.2	-0.0366237	0.0976056	0.970785	0.999148	CYSTM1	11.4698	1.94397	1.87166e-30	1.60428e-29	PRDX5	33.8585	3.25027	2.72514e-251	2.31598e-250	DNM3	0.603774	1.30465	0.545994	0.99998
ANAPC4	24.1626	1.47059	5.5069e-129	4.85903e-128	CACNA1C-AS1	-0.0784503	-0.640477	0.93747	0.999049	SYCP3	-0.0366237	-0.0277466	0.970785	0.999148	BIRC3	11.4543	1.19034	2.23693e-30	1.91191e-29	SF3B5	33.8204	3.40312	9.88388e-251	8.37617e-250	FCGBP	0.602965	0.729958	0.546532	0.99998
ST3GAL6	23.9016	1.57211	2.94901e-126	2.59444e-125	AC129926.1	-0.0784503	-0.657558	0.93747	0.999049	SMIM18	-0.0366268	-0.160754	0.970783	0.999148	CA9	11.4206	1.40086	3.29891e-30	2.79569e-29	SERPINA6	33.6898	6.33999	8.16226e-249	6.83989e-248	AC016831.6	0.601812	0.946038	0.5473	0.99998
PARD3	23.8738	1.38703	5.73807e-126	5.03339e-125	IDH2-DT	-0.0784556	-0.91659	0.937466	0.999049	ESRRB	-0.0366268	-0.0435027	0.970783	0.999148	TRIO	11.3252	1.23482	9.84684e-30	8.32128e-29	RGS22	33.6828	6.19038	1.03141e-248	8.61901e-248	PIP5K1B	0.582136	1.01581	0.560475	0.99998
NFIA	23.7725	1.62623	6.43617e-125	5.6293e-124	AC020978.3	-0.0784556	-0.83406	0.937466	0.999049	LINC01876	-0.0366939	0.39229	0.970729	0.999148	FHIT	11.2779	1.18345	1.68722e-29	1.42181e-28	AKAP9	33.5502	3.5778	8.93333e-247	7.44444e-246	VNN3	0.57294	0.739992	0.566686	0.99998
BMPR1B	23.6617	2.01579	8.94307e-124	7.79919e-123	AL355916.3	-0.0784556	-0.819581	0.937466	0.999049	AL139142.1	-0.0367716	0.476876	0.970667	0.999148	MB21D2	11.2656	1.8408	1.93937e-29	1.62972e-28	TCF7	33.5288	5.1635	1.83174e-246	1.52222e-245	NLRP10	0.572057	4.39828	0.567283	0.99998
ETV6	23.5006	1.51786	4.02086e-122	3.4964e-121	MAP3K15	-0.0784583	-0.834997	0.937464	0.999049	LY6H	-0.0375325	0.663036	0.97006	0.999148	TUBB4B	11.1764	1.44111	5.3234e-29	4.46095e-28	TTC21B	33.4896	4.34303	6.84119e-246	5.6695e-245	TNFSF13B	0.571031	2.68693	0.567978	0.99998
RERE	23.4956	1.39201	4.5268e-122	3.92497e-121	KRT14	-0.0784663	-1.02124	0.937457	0.999049	CCDC17	-0.0376804	0.503196	0.969943	0.999148	SSB	11.1266	1.90868	9.3129e-29	7.78237e-28	WDR49	33.3968	6.00775	1.52811e-244	1.2629e-243	AC116362.1	0.570099	0.941261	0.56861	0.99998
CA9	23.3924	2.06436	5.10936e-121	4.41731e-120	LINC00877	-0.078964	-0.127378	0.937061	0.999049	MEI1	-0.0382537	0.24934	0.969485	0.999148	AOPEP	11.0923	1.18207	1.36706e-28	1.13922e-27	MT-CO2	33.3868	2.34189	2.13119e-244	1.75647e-243	CPEB3	0.559147	0.650723	0.576061	0.99998
HSPB1	23.3814	2.97507	6.6028e-121	5.69207e-120	GRIK1	-0.078964	-0.318795	0.937061	0.999049	AL391863.1	-0.0382537	0.297671	0.969485	0.999148	COL18A1	11.0627	2.35679	1.90285e-28	1.58131e-27	CCDC33	33.2222	5.96279	5.15098e-242	4.21061e-241	GPNMB	0.558994	3.869	0.576166	0.99998
FBXL7	23.3087	2.0734	3.61759e-120	3.10968e-119	AL137129.1	-0.0789667	-0.351742	0.937059	0.999049	AC010531.5	-0.0382598	0.240301	0.969481	0.999148	APBB2	11.0256	1.46716	2.87517e-28	2.38274e-27	RSPH14	33.1506	6.17565	5.54271e-241	4.51851e-240	PIK3IP1-AS1	0.554088	2.41399	0.579519	0.99998
FMN1	23.1858	1.55753	6.33208e-119	5.4275e-118	AL109984.1	-0.0789667	-0.422665	0.937059	0.999049	AC018467.1	-0.0382659	0.160277	0.969476	0.999148	MACC1	10.9817	1.06505	4.68169e-28	3.86916e-27	LMNTD1	33.1196	6.0738	1.55083e-240	1.26084e-239	CYSTM1	0.515778	-0.296998	0.60601	0.99998
VWA8	23.1667	1.91045	9.87304e-119	8.43849e-118	AL031768.2	-0.0789693	-0.223227	0.937057	0.999049	AC010978.1	-0.0398836	0.266413	0.968186	0.999148	XIST	10.9174	1.06517	9.52246e-28	7.84818e-27	PPP1R32	33.118	5.98319	1.63486e-240	1.32556e-239	ARMCX4	0.507972	2.02672	0.611473	0.99998
CD69	23.1365	2.35076	1.98848e-118	1.69472e-117	MEGF11	-0.0789773	-0.489203	0.937051	0.999049	NOX5	-0.0398988	0.0675323	0.968174	0.999148	PLK2	10.9133	1.32508	9.96172e-28	8.18772e-27	C5AR1	33.0021	5.93864	7.57594e-239	6.1261e-238	LRRC4	0.503593	1.13427	0.614547	0.99998
NQO1	23.0766	1.5397	7.949e-118	6.75553e-117	RHBDL3	-0.0794697	0.00113589	0.936659	0.999049	DLEU7	-0.039908	0.183721	0.968166	0.999148	H2BC12	10.9004	1.31247	1.14709e-27	9.40238e-27	S100A10	32.8074	2.84708	4.62117e-236	3.72675e-235	STAC	0.494372	2.43809	0.621044	0.99998
METTL15	22.9992	1.52272	4.74481e-117	4.02103e-116	FAM209A	-0.0794697	-0.0513886	0.936659	0.999049	LINC01322	-0.0405179	-0.469953	0.96768	0.999148	DYNLT1	10.8895	2.08929	1.29346e-27	1.05733e-26	DNER	32.7971	4.7991	6.48543e-236	5.21616e-235	HLA-G	0.489919	2.37281	0.624191	0.99998
LINC02672	22.8333	1.97571	2.14304e-115	1.81102e-114	LINC02603	-0.0799728	-0.0364609	0.936259	0.999049	TCF4-AS1	-0.0405179	-0.696342	0.96768	0.999148	CDKAL1	10.8758	1.37937	1.50392e-27	1.22602e-26	METTL27	32.7818	4.81816	1.06922e-235	8.57665e-235	DPP4-DT	0.488346	5.16965	0.625305	0.99998
GPX3	22.7689	1.89423	9.33598e-115	7.8674e-114	GNA14	-0.0799834	-0.062783	0.93625	0.999049	AL592528.1	-0.0405179	-0.720043	0.96768	0.999148	PHLDA2	10.8708	1.12191	1.58793e-27	1.291e-26	FAM166C	32.761	6.30257	2.12062e-235	1.69649e-234	NEURL3	0.482636	4.77939	0.629354	0.99998
RHEX	22.7637	2.76188	1.04991e-114	8.82278e-114	AC103739.2	-0.0804812	0.0245856	0.935855	0.999049	AC082651.1	-0.0405179	-0.670156	0.96768	0.999148	DIRAS2	10.8605	1.15601	1.77715e-27	1.44094e-26	MS4A8	32.7249	5.81698	6.90647e-235	5.49587e-234	ATP12A	0.480111	5.2308	0.631149	0.99998
EIF4G3	22.7248	1.32266	2.54807e-114	2.13525e-113	CD226	-0.0818972	0.299517	0.934728	0.999049	TMPRSS12	-0.0405179	-0.710135	0.96768	0.999148	CCL20	10.8417	1.13926	2.18427e-27	1.76626e-26	LRP2BP	32.7196	5.66136	8.22554e-235	6.52821e-234	DIXDC1	0.480086	0.302037	0.631166	0.99998
UFC1	22.5979	1.36173	4.54175e-113	3.79533e-112	LINC00462	-0.0844352	-21.5847	0.93271	0.999049	SLC30A10	-0.0405209	-0.75516	0.967678	0.999148	IK	10.8181	1.16065	2.82685e-27	2.27972e-26	TTLL7	32.6295	6.29531	1.56373e-233	1.23778e-232	CLEC4E	0.474973	1.38347	0.634806	0.99998
PRDX5	22.5942	2.97475	4.94395e-113	4.11996e-112	LINC02202	-0.0844352	-21.7013	0.93271	0.999049	AL136164.2	-0.0405209	-0.705153	0.967678	0.999148	RMST	10.8089	1.01153	3.12251e-27	2.5114e-26	HSPA2	32.4055	3.97138	2.29878e-230	1.81482e-229	PHACTR1	0.470022	1.78942	0.638339	0.99998
TRPS1	22.5903	1.73512	5.39443e-113	4.4829e-112	CAPN14	-0.0844352	-21.7095	0.93271	0.999049	GK-AS1	-0.0405209	-0.798013	0.967678	0.999148	RALGAPA2	10.796	1.02984	3.59411e-27	2.88298e-26	BNIP3	32.2448	3.74505	4.16731e-228	3.27276e-227	SLC2A14	0.465436	3.87141	0.641619	0.99998
CADPS2	22.4039	1.89021	3.60886e-111	2.99077e-110	AC024475.3	-0.0849635	-1.58068	0.93229	0.999049	AC007391.3	-0.040524	-0.82903	0.967675	0.999148	DIAPH2	10.7364	1.20207	6.87052e-27	5.49641e-26	C1orf158	32.0508	6.31802	2.13737e-225	1.66549e-224	AP005264.1	0.463956	3.71767	0.642679	0.99998
NAV2	22.363	1.54643	9.01826e-111	7.4531e-110	VWF	-0.0849635	-1.34546	0.93229	0.999049	TMEM204	-0.040524	-0.879148	0.967675	0.999148	JARID2	10.7296	1.35465	7.39399e-27	5.89946e-26	ENO4	31.8744	5.23232	6.04618e-223	4.68696e-222	KCNK9	0.460781	3.30262	0.644956	0.99998
INSIG1	22.3593	1.87443	9.79287e-111	8.07105e-110	MCHR2-AS1	-0.0849635	-1.78122	0.93229	0.999049	AP001107.6	-0.0414983	0.315715	0.966899	0.999148	FAM162A	10.7226	1.5989	7.97091e-27	6.3429e-26	AL121956.6	31.7655	6.38534	1.93912e-221	1.49547e-220	ZNF407	0.459469	0.349497	0.645897	0.99998
EEF1A1	22.3283	1.76533	1.96434e-110	1.61453e-109	SLC38A8	-0.0849635	-1.5731	0.93229	0.999049	DUOX2	-0.0420548	0.503779	0.966455	0.999148	UGT2B7	10.6796	1.69356	1.26851e-26	1.00676e-25	C11orf16	31.7275	6.56699	6.49916e-221	4.99935e-220	PTPRK	0.457058	0.198685	0.64763	0.99998
TTC28	22.2948	2.10537	4.14617e-110	3.38924e-109	THBD	-0.0849635	-1.77364	0.93229	0.999049	MAP3K15	-0.0421676	-0.0441401	0.966365	0.999148	HBEGF	10.6696	1.58958	1.41271e-26	1.11824e-25	LDLRAD1	31.6537	5.83948	6.75261e-220	5.18103e-219	MFAP5	0.447112	0.500621	0.654794	0.99998
IFT43	21.9483	1.38282	8.99243e-107	7.27151e-106	AP001442.1	-0.0849662	-1.62977	0.932288	0.999049	AL355916.3	-0.0421707	-0.291041	0.966363	0.999148	AUTS2	10.6545	1.43875	1.66107e-26	1.31137e-25	ALMS1	31.6493	4.09379	7.74989e-220	5.93104e-219	AC003991.1	0.443818	2.95022	0.657174	0.99998
CEP350	21.9325	1.322	1.27287e-106	1.02651e-105	AC011477.8	-0.0849662	-1.55132	0.932288	0.999049	CACNA2D1	-0.0421707	-0.144446	0.966363	0.999148	NFIA	10.5261	1.05421	6.55091e-26	5.1582e-25	DLG5-AS1	31.6472	5.70375	8.28951e-220	6.32787e-219	MIR193BHG	0.432989	1.06835	0.665023	0.99998
FBXL17	21.9172	1.70003	1.7825e-106	1.43365e-105	DPP4-DT	-0.0849688	-1.79049	0.932286	0.999049	C16orf89	-0.0421707	-0.195003	0.966363	0.999148	CLASP1	10.508	1.32167	7.93996e-26	6.23557e-25	DOC2A	31.4478	7.02695	4.50342e-217	3.42032e-216	AKR1C2	0.430341	1.89986	0.666948	0.99998
LONRF2	21.8472	1.81767	8.2624e-106	6.62759e-105	AC008273.1	-0.0849688	-1.89916	0.932286	0.999049	MPP7-DT	-0.0421768	-0.231853	0.966358	0.999148	ALMS1	10.5051	1.20541	8.18686e-26	6.41268e-25	PCAT19	31.4021	5.09036	1.89477e-216	1.43543e-215	RNF165	0.426154	0.997958	0.669995	0.99998
NFKBIZ	21.7984	1.48042	2.40378e-105	1.92302e-104	AC011473.1	-0.0849688	-1.75798	0.932286	0.999049	AC084816.1	-0.0421798	-0.254145	0.966355	0.999148	MX1	10.4973	1.09626	8.89169e-26	6.94663e-25	DZIP1L	31.3792	6.02227	3.88991e-216	2.93948e-215	M1AP	0.415335	2.66046	0.677896	0.99998
MX1	21.7873	1.57703	3.06506e-105	2.44553e-104	ENHO	-0.0849688	-1.61053	0.932286	0.999049	CR381653.1	-0.0421829	-0.179315	0.966353	0.999148	MUC5B	10.4793	1.04373	1.07486e-25	8.37555e-25	MT-ND1	31.3279	2.08259	1.94838e-215	1.46863e-214	STOX2	0.410907	0.421742	0.681141	0.99998
NLGN4X	21.6233	2.09668	1.08374e-103	8.6239e-103	TMLHE-AS1	-0.0853575	0.564326	0.931977	0.999049	AC022463.1	-0.0422408	0.565591	0.966307	0.999148	S100P	10.4754	1.56608	1.12109e-25	8.71313e-25	CLDN3	31.307	3.34978	3.74941e-215	2.8191e-214	SMURF1	0.405064	0.238598	0.685431	0.99998
MPPED2	21.5355	2.28883	7.24457e-103	5.74966e-102	AC130814.1	-0.0854839	-0.780813	0.931877	0.999049	AC100781.1	-0.0431343	0.352115	0.965594	0.999148	PIGR	10.4284	1.09077	1.84003e-25	1.41905e-24	INPP4B	31.1865	4.36725	1.62275e-213	1.21706e-212	ADAMTS1	0.400359	0.615518	0.688892	0.99998
EXOC4	21.4497	1.28941	4.59782e-102	3.63943e-101	AC092111.1	-0.0854839	-0.805607	0.931877	0.999049	AC005753.2	-0.0438082	0.252859	0.965057	0.999148	IFT57	10.4243	1.26936	1.92113e-25	1.47779e-24	SYNE1	31.0025	4.42402	4.98592e-211	3.73011e-210	CAPN14	0.391838	5.36334	0.695178	0.99998
TNRC6B	21.4492	1.42521	4.64641e-102	3.66822e-101	AC123595.3	-0.0854839	-0.680941	0.931877	0.999049	AL133480.1	-0.0438082	0.147968	0.965057	0.999148	SH3D19	10.3728	0.98962	3.29601e-25	2.52891e-24	CCDC151	30.9246	5.46326	5.58468e-210	4.15733e-209	AF241726.2	0.390788	0.847529	0.695954	0.99998
TMCC1	21.4276	1.55177	7.39278e-102	5.82109e-101	NEURL3	-0.0854839	-0.690025	0.931877	0.999049	AL391361.2	-0.0446941	0.46507	0.964351	0.999148	ITGA3	10.3711	1.00325	3.35712e-25	2.56922e-24	ECT2L	30.8047	6.09195	2.26353e-208	1.68084e-207	PKP1	0.384762	4.86093	0.700414	0.99998
LRBA	21.3025	1.23044	1.07596e-100	8.42786e-100	AC091132.4	-0.0854839	-0.693436	0.931877	0.999049	SERPINE1	-0.044967	0.652837	0.964134	0.999148	INSIG1	10.3507	1.17333	4.15244e-25	3.1698e-24	AC096637.3	30.7542	6.43119	1.07401e-207	7.9556e-207	LINC01843	0.383549	1.72071	0.701313	0.99998
RABGAP1L	21.1422	1.36	3.25818e-99	2.54545e-98	AL163636.2	-0.0854865	-0.935862	0.931875	0.999049	INKA2-AS1	-0.0460633	-0.628657	0.96326	0.999148	CA2	10.3413	1.82093	4.58321e-25	3.48975e-24	MEIG1	30.6795	5.55678	1.06974e-206	7.90446e-206	CHI3L2	0.383387	4.91684	0.701433	0.99998
SOSTDC1	21.1335	3.10563	3.91774e-99	3.05279e-98	AC113385.1	-0.0854892	-0.915524	0.931872	0.999049	CPLX2	-0.0460633	-0.739269	0.96326	0.999148	PHTF1	10.3393	0.952297	4.68177e-25	3.55577e-24	CCN2	30.49	4.40581	3.53257e-204	2.59748e-203	KRT14	0.382001	4.86007	0.702461	0.99998
PAN3	21.1124	1.4351	6.12167e-99	4.75778e-98	BMPER	-0.0854919	-0.908614	0.93187	0.999049	GLIS1	-0.0460663	-0.754783	0.963257	0.999148	GIHCG	10.2733	0.979534	9.30159e-25	7.04666e-24	CENPK	30.3478	3.84766	2.68219e-202	1.96738e-201	TIAM2	0.380768	0.265147	0.703375	0.99998
CD8B	20.7964	2.37936	4.66261e-96	3.60511e-95	INSL3	-0.0859963	-0.371903	0.931469	0.999049	AL078602.1	-0.0460663	-0.873168	0.963257	0.999148	RPS14	10.2339	1.44884	1.39844e-24	1.05675e-23	CASC2	30.1977	4.37743	2.53682e-200	1.85621e-199	PPM1H	0.379545	0.108939	0.704283	0.99998
HLA-B	20.7786	2.61954	6.75395e-96	5.2087e-95	ARMC12	-0.0859963	-0.326487	0.931469	0.999049	NHS-AS1	-0.0460663	-0.769709	0.963257	0.999148	PAX8	10.1848	1.59901	2.31789e-24	1.74715e-23	NQO1	30.1172	3.41357	2.88483e-199	2.10572e-198	OSBPL10	0.378362	0.10426	0.705162	0.99998
IL33	20.7157	3.13116	2.50101e-95	1.92385e-94	AF130359.1	-0.0859963	-0.431217	0.931469	0.999049	RGS9BP	-0.0460663	-0.814373	0.963257	0.999148	CCDC138	10.1657	1.09044	2.82146e-24	2.1214e-23	MYB	29.9629	4.8762	2.98947e-197	2.1768e-196	HAGHL	0.375852	0.101043	0.707027	0.99998
GLIS3	20.6967	1.45256	3.71046e-95	2.8469e-94	LINC02334	-0.0860043	-0.476214	0.931463	0.999049	LINC01433	-0.0460694	-1.22256	0.963255	0.999148	IL1R1	10.0607	1.30954	8.24002e-24	6.18001e-23	ANKFN1	29.9607	4.98147	3.19268e-197	2.31914e-196	PINCR	0.372997	3.58579	0.709151	0.99998
EXT1	20.6797	1.57605	5.27515e-95	4.03711e-94	AC006435.2	-0.0860043	-0.630179	0.931463	0.999049	AC111170.2	-0.0460724	-1.02324	0.963253	0.999148	SIK3	9.90696	1.15985	3.88296e-23	2.90495e-22	SPTBN1	29.9214	3.33659	1.03578e-196	7.50566e-196	DSC3	0.369185	4.25031	0.71199	0.99998
TACR1	20.5981	2.63493	2.85615e-94	2.18027e-93	KRTAP2-3	-0.0860069	-0.677547	0.931461	0.999049	ZNF503-AS1	-0.0460724	-0.957139	0.963253	0.999148	RANBP17	9.88405	1.40089	4.8817e-23	3.63402e-22	ANKRD44-AS1	29.7181	5.93944	4.48547e-194	3.24251e-193	AP003472.1	0.368662	3.128	0.71238	0.99998
DPCD	20.5673	1.27839	5.38913e-94	4.1034e-93	AC010531.5	-0.0860149	-0.580866	0.931455	0.999049	TNNT3	-0.0467906	0.559023	0.96268	0.999148	UFC1	9.88133	1.01658	5.01612e-23	3.72484e-22	EFCAB6	29.6733	4.42131	1.69693e-193	1.22375e-192	FER1L6	0.367084	1.28897	0.713556	0.99998
ERC1	20.4767	1.47525	3.47478e-93	2.63907e-92	LINC02201	-0.0865007	-0.149883	0.931068	0.999049	ADGRG3	-0.0470223	0.458107	0.962495	0.999148	S100A2	9.83762	1.15112	7.75253e-23	5.7144e-22	PPP1R2	29.6095	3.20792	1.12747e-192	8.11129e-192	AL135924.2	0.364328	3.08519	0.715613	0.99998
AKAP13	20.3425	1.41258	5.41299e-92	4.10075e-91	VEGFD	-0.0865007	-0.136468	0.931068	0.999049	BMPER	-0.0477145	-0.0576175	0.961944	0.999148	RPS20	9.83718	1.45608	7.78618e-23	5.72513e-22	DAPP1	29.5543	4.53886	5.78242e-192	4.15006e-191	AC027601.1	0.363337	3.64353	0.716354	0.99998
MGAT5	20.3097	1.24907	1.05572e-91	7.9577e-91	DSC3	-0.086522	-0.348186	0.931052	0.999049	CUX2	-0.0477176	-0.178993	0.961941	0.999148	RND3	9.81702	1.007	9.51136e-23	6.97654e-22	C1orf189	29.4977	6.22801	3.07908e-191	2.19934e-190	RCAN2	0.355688	1.61605	0.722074	0.99998
EVI5	20.2591	1.31754	2.9521e-91	2.21962e-90	LINC00159	-0.0869971	0.0160276	0.930674	0.999049	AC017050.1	-0.0477206	-0.246451	0.961939	0.999148	IFI6	9.78577	1.60913	1.29601e-22	9.45996e-22	PALMD	29.4939	5.08791	3.44742e-191	2.45659e-190	H2BC5	0.353578	0.290828	0.723655	0.99998
WNT7A	20.2098	1.62259	8.02992e-91	6.02244e-90	CLDN12	-0.0870077	-0.133641	0.930665	0.999049	AC090630.1	-0.0477283	-0.250548	0.961933	0.999148	SERPINB1	9.78212	1.53933	1.34368e-22	9.78406e-22	SH3D19	29.4016	3.3352	5.24265e-190	3.727e-189	TMEM252-DT	0.35159	2.88301	0.725145	0.99998
CYP1B1	20.1789	2.97104	1.50048e-90	1.12256e-89	SLC2A14	-0.0870077	-0.0944688	0.930665	0.999049	AL031848.1	-0.0477298	-0.634795	0.961932	0.999148	ARID1B	9.74033	1.01434	2.02884e-22	1.47373e-21	PCM1	29.3763	3.1805	1.10211e-189	7.81639e-189	AC018695.9	0.350205	3.08274	0.726185	0.99998
GADD45A	20.008	1.40032	4.68682e-89	3.49763e-88	SAMD3	-0.0879819	0.121301	0.929891	0.999049	NR5A2	-0.0493506	0.211978	0.96064	0.999148	KANSL1	9.72204	1.13736	2.42867e-22	1.7599e-21	PLOD2	29.3504	3.30687	2.36148e-189	1.67086e-188	AL356124.1	0.350008	1.57475	0.726333	0.99998
SLC6A6	19.964	1.4591	1.1329e-88	8.43349e-88	PTP4A1	-0.0889135	0.387136	0.929151	0.999049	TYROBP	-0.049378	-0.152855	0.960618	0.999148	MAML2	9.70703	0.894581	2.81408e-22	2.03428e-21	TEKT4	29.2435	6.26358	5.42696e-188	3.83079e-187	FGF12	0.345308	0.410098	0.729863	0.99998
HRH1	19.9589	1.43802	1.25418e-88	9.3132e-88	PLA2G2F	-0.0914714	-21.7499	0.927118	0.999049	ESM1	-0.0509744	0.247545	0.959346	0.999148	RPS6	9.70136	1.3966	2.97506e-22	2.14548e-21	RCAN3AS	29.1765	5.73664	3.85472e-187	2.70824e-186	ALDH1A2	0.338321	1.41287	0.735121	0.99998
H2AZ2	19.8751	2.07912	6.68933e-88	4.95506e-87	PKP1	-0.0919985	-1.57137	0.926699	0.999049	AC027319.1	-0.0509774	0.116474	0.959343	0.999148	KRT17	9.69004	1.24156	3.32401e-22	2.39137e-21	SELENOW	29.045	2.96708	1.78198e-185	1.24905e-184	OXTR	0.337433	1.62363	0.73579	0.99998
ASAP1	19.8434	1.60175	1.25653e-87	9.28471e-87	AC007610.2	-0.0919985	-1.48106	0.926699	0.999049	LINC01571	-0.051014	0.705018	0.959314	0.999148	CD55	9.66682	1.0887	4.17116e-22	2.99365e-21	PLAAT4	29.0136	4.11129	4.42822e-185	3.09666e-184	STXBP5	0.337315	0.22349	0.73588	0.99998
PCNA	19.841	1.24416	1.31699e-87	9.70755e-87	AC004771.1	-0.0919985	-1.6199	0.926699	0.999049	AC018690.1	-0.0516117	-0.750633	0.958838	0.999148	CADPS2	9.62494	1.07976	6.27462e-22	4.49257e-21	TTC23L	29.0027	5.83912	6.07479e-185	4.23822e-184	IQCJ-SCHIP1	0.330352	1.15955	0.741134	0.99998
MAP3K5	19.7505	1.32292	7.94055e-87	5.83864e-86	CCL7	-0.0919985	-1.60421	0.926699	0.999049	ADAMTSL1	-0.0516117	-0.874332	0.958838	0.999148	TPK1	9.5888	1.59085	8.91155e-22	6.35027e-21	ANKDD1B	28.8368	6.16392	7.42825e-183	5.15851e-182	DGKG	0.328459	1.17404	0.742565	0.99998
SQLE	19.633	1.19475	8.08147e-86	5.92773e-85	AC008079.1	-0.0920011	-1.64067	0.926697	0.999049	LINC02506	-0.0516117	-0.519056	0.958838	0.999148	EXOC4	9.54953	0.874444	1.30283e-21	9.26179e-21	ZNF295-AS1	28.7386	5.55074	1.25683e-181	8.70786e-181	FAM155A	0.325327	2.12208	0.744933	0.99998
CLIC5	19.6096	2.41868	1.27932e-85	9.36091e-85	DACT3-AS1	-0.0920011	-1.55518	0.926697	0.999049	INE2	-0.0516148	-0.864671	0.958836	0.999148	SEC14L1	9.54865	1.45759	1.31393e-21	9.31866e-21	C22orf15	28.6482	5.84565	1.68896e-180	1.16749e-179	NAALADL2	0.324494	0.250345	0.745564	0.99998
DGKH	19.5693	1.63646	2.82337e-85	2.06086e-84	AC005993.1	-0.0920038	-1.83553	0.926695	0.999049	LINC00881	-0.0516148	-0.719421	0.958836	0.999148	DNAH14	9.51986	1.33759	1.73408e-21	1.22694e-20	PPP1R14C	28.5842	5.05379	1.05726e-179	7.29143e-179	DYNLL1	0.322344	-0.273112	0.747192	0.99998
GADD45B	19.5344	1.76458	5.59621e-85	4.07491e-84	AL023754.1	-0.0920091	-2.04917	0.926691	0.999049	AC004471.1	-0.0516148	-0.841196	0.958836	0.999148	LRRC49	9.51091	1.04161	1.89005e-21	1.33415e-20	MYCBPAP	28.4997	6.03524	1.18047e-178	8.12249e-178	CXCL11	0.321742	2.58537	0.747648	0.99998
MCM3	19.5255	1.31933	6.66812e-85	4.84367e-84	LINC01502	-0.0925175	-0.926632	0.926287	0.999049	AC025211.1	-0.0516178	-0.847063	0.958833	0.999148	IFT43	9.49526	1.09225	2.19656e-21	1.54687e-20	QPRT	28.4415	3.30307	6.20429e-178	4.25924e-177	H2BC12	0.312077	0.312735	0.754982	0.99998
KIF9	19.4869	1.17385	1.41701e-84	1.02682e-83	OR13A1	-0.0925175	-0.844841	0.926287	0.999049	GATA3	-0.0516178	-1.01093	0.958833	0.999148	C11orf49	9.49275	0.893823	2.25021e-21	1.58094e-20	KIAA0556	28.3912	3.82585	2.59999e-177	1.78081e-176	AC127526.2	0.304957	1.51183	0.760399	0.99998
IMMP2L	19.457	1.55184	2.54195e-84	1.83755e-83	MIR646HG	-0.0925175	-0.842753	0.926287	0.999049	AC009269.2	-0.0516178	-1.04737	0.958833	0.999148	TIMP1	9.48809	1.9503	2.35308e-21	1.64935e-20	TCIM	28.3149	3.65135	2.26812e-176	1.54997e-175	LGALS3	0.302294	0.212584	0.762428	0.99998
TCTN1	19.371	1.20557	1.35718e-83	9.74054e-83	ACRV1	-0.0925175	-0.878377	0.926287	0.999049	WEE2	-0.0516178	-0.87958	0.958833	0.999148	PTBP2	9.45528	1.39331	3.2217e-21	2.25294e-20	DIXDC1	28.2817	4.66533	5.79708e-176	3.95255e-175	AC026167.1	0.29897	2.30293	0.764963	0.99998
H1-0	19.3501	2.65563	2.03373e-83	1.45613e-82	AC073254.1	-0.0925202	-0.881214	0.926285	0.999049	EPN2-AS1	-0.0516209	-1.17466	0.958831	0.999148	ERC1	9.43685	0.964586	3.84168e-21	2.68024e-20	DNAH2	28.2046	5.61259	5.12964e-175	3.48955e-174	HERC5	0.298704	0.362289	0.765166	0.99998
PAEP	19.3434	1.43531	2.31617e-83	1.6544e-82	LRRIQ4	-0.0925228	-0.780441	0.926283	0.999049	LINC01973	-0.0532584	-0.0754261	0.957526	0.999148	ATP5IF1	9.37209	2.16927	7.11076e-21	4.94948e-20	TOGARAM2	28.201	6.40915	5.68412e-175	3.858e-174	CALB2	0.289542	4.64263	0.772167	0.99998
KPNA2	19.0698	1.19504	4.50204e-81	3.2005e-80	AL356805.1	-0.0925255	-1.0316	0.926281	0.999049	AL449403.3	-0.0532645	-0.244113	0.957521	0.999148	FTL	9.36207	2.27374	7.81891e-21	5.4298e-20	PLAAT3	28.1324	5.37018	3.93498e-174	2.66477e-173	TMEM178B	0.289483	4.33537	0.772212	0.99998
CXCL1	18.8681	1.2964	2.08846e-79	1.47768e-78	NNAT	-0.0925308	-1.09012	0.926276	0.999049	LRRIQ4	-0.0532645	-0.13969	0.957521	0.999148	FRAS1	9.34294	1.23402	9.36931e-21	6.49144e-20	LRGUK	28.1169	5.13434	6.08239e-174	4.10972e-173	SLC44A4	0.287703	0.0931416	0.773574	0.99998
SLC14A1	18.7678	2.44572	1.38517e-78	9.77764e-78	AC013468.1	-0.0930285	-0.471809	0.925881	0.999049	AL117350.2	-0.0532676	-0.272936	0.957519	0.999148	LINC01515	9.31694	1.91964	1.19741e-20	8.27701e-20	EIF4G3	28.0338	3.02179	6.302e-173	4.24854e-172	AC011442.1	0.286662	4.24063	0.774371	0.99998
CFAP36	18.7645	1.46157	1.47448e-78	1.03837e-77	LINC02028	-0.0930285	-0.223418	0.925881	0.999049	AC073254.1	-0.0532676	-0.249219	0.957519	0.999148	ARHGAP18	9.28242	0.846964	1.65669e-20	1.14254e-19	CCDC89	28.0335	5.46768	6.35306e-173	4.27336e-172	IDO1	0.284537	0.259215	0.775999	0.99998
SSH2	18.6449	1.28359	1.38886e-77	9.75782e-77	AC012443.2	-0.0930285	-0.406484	0.925881	0.999049	OR13A1	-0.0532706	-0.344909	0.957516	0.999148	TPM1	9.27389	0.926077	1.79472e-20	1.2349e-19	AC046134.2	27.8781	3.96479	4.91535e-171	3.29153e-170	MAF	0.283812	3.94667	0.776555	0.99998
FHIT	18.6053	1.37591	2.91193e-77	2.03631e-76	CECR2	-0.0930312	-0.68232	0.925879	0.999049	ACRV1	-0.0532767	-0.499531	0.957511	0.999148	H2AC8	9.2461	1.63346	2.32844e-20	1.59847e-19	ST3GAL6	27.8103	3.30403	3.25442e-170	2.17445e-169	LINC01480	0.279433	0.204215	0.779912	0.99998
GMNC	18.6029	2.26244	3.04672e-77	2.12562e-76	USP12-AS2	-0.0930312	-0.521859	0.925879	0.999049	CCDC148-AS1	-0.053295	-0.622691	0.957497	0.999148	GLRX	9.24487	0.95123	2.3553e-20	1.61322e-19	H2BC5	27.7262	3.88486	3.37729e-169	2.25153e-168	KSR1	0.276534	0.415809	0.782138	0.99998
IFT22	18.5772	1.32784	4.91291e-77	3.41174e-76	RIPOR3	-0.0930339	-0.497765	0.925877	0.999049	AL138701.2	-0.0541611	0.387249	0.956807	0.999148	RPS5	9.2419	1.49629	2.42152e-20	1.6548e-19	MYO1E	27.6746	3.28453	1.41059e-168	9.38306e-168	SHISA9	0.275044	3.00033	0.783282	0.99998
HPGD	18.5407	2.66337	9.68679e-77	6.7114e-76	AL627309.1	-0.0935316	-0.255991	0.925481	0.999049	AC079035.1	-0.0548594	0.536747	0.95625	0.999148	ATAD2B	9.24103	1.29215	2.44138e-20	1.66457e-19	PLPPR3	27.6327	5.95126	4.50926e-168	2.99287e-167	CCL5	0.27247	3.82387	0.78526	0.99998
TBCK	18.4542	1.58992	4.82269e-76	3.33366e-75	AC002072.1	-0.0935476	-0.391845	0.925469	0.999049	AC006111.1	-0.0549051	0.0326197	0.956214	0.999148	FMN1	9.10563	0.874955	8.57656e-20	5.78195e-19	CENPM	27.4348	3.40919	1.05446e-165	6.96778e-165	AC005753.2	0.270804	3.01247	0.786542	0.99998
ODF2L	18.2864	1.21192	1.06237e-74	7.27654e-74	CCDC3	-0.0940267	0.0549663	0.925088	0.999049	AL390774.2	-0.0549265	-0.418477	0.956197	0.999148	RPLP1	9.07482	0.588699	1.13861e-19	7.65881e-19	AGPAT4	27.3827	4.48014	4.41119e-165	2.90848e-164	NCAM1	0.26963	3.57992	0.787445	0.99998
SPAG16	18.2608	1.1132	1.69702e-74	1.15969e-73	AL357075.4	-0.0940293	-0.0515477	0.925086	0.999049	MAPK10-AS1	-0.0565366	0.0300753	0.954914	0.999148	WDR54	9.07006	0.780283	1.18947e-19	7.98302e-19	AC004832.1	27.1607	6.2889	1.89224e-162	1.24217e-161	CYP2W1	0.264985	2.75809	0.791021	0.99998
CETN2	18.1834	1.35576	6.99151e-74	4.75613e-73	CLN6	-0.0940347	-0.221986	0.925082	0.999049	AC104653.1	-0.0565396	0.0848097	0.954912	0.999148	ZSWIM6	9.05961	1.0948	1.30914e-19	8.76658e-19	MAP1B	27.1018	3.41956	9.38549e-162	6.1477e-161	PPP1R1C	0.264832	0.774539	0.791139	0.99998
DYNLT1	18.0718	2.71732	5.31289e-73	3.60603e-72	PLD5	-0.0945138	0.0696021	0.924701	0.999049	AC008273.1	-0.0571602	-0.855772	0.954418	0.999148	NLGN4X	9.05275	1.09861	1.39406e-19	9.31446e-19	CD24	27.0802	3.38977	1.68666e-161	1.10239e-160	AP000866.2	0.262539	3.23608	0.792906	0.99998
TMPO	17.8684	1.16263	2.07961e-71	1.40831e-70	CLEC19A	-0.0954773	0.103952	0.923936	0.999049	EGLN3-AS1	-0.0571602	-0.984671	0.954418	0.999148	MYO1E	9.01665	0.899324	1.93935e-19	1.2929e-18	AL355601.1	26.9722	5.89695	3.1362e-160	2.04535e-159	PRKN	0.260399	0.116948	0.794556	0.99998
TRIO	17.8453	1.35396	3.14349e-71	2.12398e-70	SLC14A2-AS1	-0.0964302	0.115783	0.923179	0.999049	AC011477.8	-0.0571602	-0.852237	0.954418	0.999148	WWOX	8.98644	1.2312	2.55372e-19	1.69871e-18	DERL3	26.9156	5.37685	1.44082e-159	9.37628e-159	MAP7D2	0.260374	1.03189	0.794575	0.99998
COP1	17.8381	1.26475	3.57696e-71	2.41144e-70	AC113143.3	-0.0985077	-21.7617	0.921529	0.999049	AC024475.3	-0.0571632	-0.937486	0.954415	0.999148	LDLR	8.97494	1.03696	2.83517e-19	1.88175e-18	SNX29	26.8887	4.08314	2.98103e-159	1.93573e-158	AC211433.1	0.259812	1.53566	0.795009	0.99998
ROBO2	17.8357	2.50616	3.73331e-71	2.51119e-70	LINC02408	-0.0985077	-21.931	0.921529	0.999049	AC007610.3	-0.0571632	-0.922547	0.954415	0.999148	IMMP2L	8.95729	0.961024	3.32764e-19	2.20374e-18	MGAT5	26.761	3.01975	9.19066e-158	5.95507e-157	LINC02577	0.255073	2.67272	0.798667	0.99998
LGR5	17.7869	2.28015	8.92402e-71	5.97591e-70	AC004540.2	-0.0990334	-1.64381	0.921112	0.999049	MCHR2-AS1	-0.0571632	-1.11683	0.954415	0.999148	FBXL17	8.92028	0.941737	4.65112e-19	3.06667e-18	H2AC6	26.686	3.3486	6.83716e-157	4.42058e-156	PLD5	0.253653	2.6589	0.799764	0.99998
DPY30	17.7234	1.70962	2.76755e-70	1.84914e-69	TH	-0.0990334	-1.63462	0.921112	0.999049	CKM	-0.0571663	-0.961285	0.954413	0.999148	MMP7	8.88515	1.78252	6.38325e-19	4.19951e-18	PROM1	26.6187	3.39983	4.12821e-156	2.66336e-155	AC104109.4	0.253574	2.47194	0.799825	0.99998
HSPA8	17.4628	2.33916	2.7516e-68	1.82225e-67	CHI3L2	-0.0990334	-1.8021	0.921112	0.999049	AC009403.2	-0.0571663	-0.960453	0.954413	0.999148	ODF2L	8.88401	1.05907	6.44902e-19	4.23349e-18	KIF6	26.6081	4.67254	5.46534e-156	3.51846e-155	IL11	0.250704	2.51085	0.802043	0.99998
FTX	17.4188	1.36474	5.93909e-68	3.92451e-67	SYCP3	-0.0990334	-1.73487	0.921112	0.999049	AC016526.2	-0.0571663	-1.02275	0.954413	0.999148	CEP128	8.87522	1.56674	6.97971e-19	4.57187e-18	SERPINI2	26.5411	6.20909	3.25142e-155	2.08871e-154	UNC79	0.249531	0.222677	0.80295	0.99998
H2BC12	17.4071	1.34691	7.28788e-68	4.8052e-67	KLHL30	-0.0990361	-1.86869	0.92111	0.999049	AC007620.2	-0.0571693	-1.14758	0.95441	0.999148	S100A4	8.85871	0.85295	8.09485e-19	5.29075e-18	HABP2	26.4462	5.6648	4.03523e-154	2.58669e-153	STX16-NPEPL1	0.24346	1.58782	0.807649	0.99998
FRAS1	17.3626	1.82212	1.58314e-67	1.04154e-66	H2AC19	-0.0990361	-1.6164	0.92111	0.999049	DPP4-DT	-0.0571693	-1.1304	0.95441	0.999148	GPHN	8.80944	1.08365	1.25774e-18	8.16711e-18	PLCH1	26.4107	3.93299	1.03202e-153	6.60142e-153	AC128687.2	0.243367	1.17192	0.807721	0.99998
JARID2	17.3026	1.64615	4.4964e-67	2.95169e-66	TBC1D24	-0.0995511	-0.83666	0.920701	0.999049	AC093849.4	-0.0571846	-1.74686	0.954398	0.999148	PTPN14	8.75505	0.94725	2.04011e-18	1.32188e-17	ULK4	26.2976	4.13169	2.04223e-152	1.30355e-151	AC022826.2	0.243199	1.99903	0.807851	0.99998
GON7	17.2825	1.03368	6.37168e-67	4.17359e-66	AC004900.1	-0.0995511	-0.845982	0.920701	0.999049	TGFB2-AS1	-0.0588053	-0.0685633	0.953107	0.999148	FER	8.71141	0.960004	3.00107e-18	1.94035e-17	AC010255.3	26.2933	6.1438	2.28601e-152	1.45606e-151	COBL	0.242834	0.100672	0.808134	0.99998
ARHGEF3	17.274	1.50902	7.38433e-67	4.82636e-66	TLCD4-RWDD3	-0.0995538	-0.914085	0.920699	0.999049	AC007493.2	-0.0588084	-0.240034	0.953105	0.999148	TRAF3IP1	8.6807	0.785099	3.93356e-18	2.53778e-17	AGBL4	26.2502	5.08982	7.10533e-152	4.50655e-151	2024-12-01	0.24169	0.538509	0.80902	0.99998
NUCB2	17.2355	1.1163	1.43778e-66	9.35651e-66	AC012506.4	-0.0995538	-0.919033	0.920699	0.999049	KIAA2012-AS1	-0.0588084	-0.290973	0.953105	0.999148	INVS	8.66905	1.33175	4.35752e-18	2.80527e-17	LINC02725	26.1237	6.01382	1.95933e-150	1.24008e-149	CD59	0.240576	2.08385	0.809884	0.99998
UBE2D2	17.1254	2.446	9.59988e-66	6.22023e-65	ENTPD1	-0.0995564	-0.916338	0.920696	0.999049	AC005740.5	-0.0588084	-0.283432	0.953105	0.999148	PPP1R9A	8.66727	0.866067	4.42603e-18	2.84327e-17	LINC00342	26.1234	4.3778	1.97497e-150	1.24735e-149	KCNN2	0.240536	2.07752	0.809915	0.99998
CXCL2	17.019	1.3883	5.93288e-65	3.83592e-64	AC005740.5	-0.0995591	-1.05659	0.920694	0.999049	AC004554.2	-0.0588084	-0.362836	0.953105	0.999148	UCA1	8.66384	0.89406	4.56152e-18	2.92405e-17	DCDC2B	26.0973	6.19437	3.91594e-150	2.46803e-149	KCNQ1OT1	0.239866	0.415029	0.810434	0.99998
S100A11	16.9336	2.18154	2.54419e-64	1.64141e-63	AC009509.2	-0.0995591	-1.16503	0.920694	0.999049	AC012506.4	-0.0588175	-0.549241	0.953097	0.999148	FARS2	8.64678	1.05837	5.29748e-18	3.38858e-17	UBB	26.0851	2.60282	5.38378e-150	3.38602e-149	CLCA4	0.235122	2.29618	0.814114	0.99998
MID1	16.5816	1.3698	9.46512e-62	6.04157e-61	RIC3	-0.100061	-0.556376	0.920296	0.999049	MYLK3	-0.0599763	0.64886	0.952174	0.999148	CLDN3	8.63935	1.58501	5.65339e-18	3.60854e-17	APOBEC4	26.0334	6.24359	2.07445e-149	1.30196e-148	SPTBN1	0.234644	-0.0787929	0.814485	0.99998
PTPN14	16.5427	1.29236	1.80862e-61	1.15199e-60	AC026894.3	-0.100063	-0.512553	0.920294	0.999049	CPXCR1	-0.0604444	-0.0772939	0.951802	0.999148	WDFY3	8.60446	0.96259	7.66754e-18	4.88378e-17	RAMP1	26.0145	4.1734	3.39312e-149	2.12513e-148	LINC01088	0.23347	1.0765	0.815397	0.99998
RND3	16.5236	1.15996	2.48209e-61	1.5776e-60	A2M	-0.100063	-0.532177	0.920294	0.999049	LINC02201	-0.0604719	-0.160922	0.95178	0.999148	IL4I1	8.5515	1.14437	1.21503e-17	7.72267e-17	ITGA3	25.9576	2.95412	1.49209e-148	9.32555e-148	AL078459.1	0.230546	0.120399	0.817668	0.99998
NUCKS1	16.4408	3.00162	9.7634e-61	6.19243e-60	AC244517.1	-0.100563	-0.462497	0.919898	0.999049	AC074091.2	-0.0610497	-21.394	0.95132	0.999148	TNFAIP2	8.49467	1.37473	1.98498e-17	1.25897e-16	COL21A1	25.9389	5.13162	2.42365e-148	1.51163e-147	LINC02185	0.227696	1.85449	0.819883	0.99998
CHST6	16.4286	0.95125	1.19371e-60	7.55513e-60	LINC01695	-0.100573	-0.520516	0.919889	0.999049	AC132803.1	-0.0610497	-21.4396	0.95132	0.999148	B9D1	8.46939	0.796907	2.46685e-17	1.5613e-16	WDPCP	25.9358	3.22666	2.62638e-148	1.63467e-147	DNER	0.226315	0.157338	0.820957	0.99998
AGAP1	16.4044	0.953013	1.77868e-60	1.12101e-59	EPHB1	-0.100576	-0.4087	0.919887	0.999049	AC105290.1	-0.0610497	-21.4731	0.95132	0.999148	EXT1	8.46096	0.890188	2.6518e-17	1.67482e-16	SLC2A1	25.9172	3.15106	4.25844e-148	2.64499e-147	CATSPERG	0.22592	0.418945	0.821263	0.99998
H2AC6	16.3626	1.05846	3.53888e-60	2.22571e-59	LINC02462	-0.101064	-0.13105	0.919499	0.999049	AC009163.5	-0.0610497	-21.4423	0.95132	0.999148	TACSTD2	8.43271	1.98208	3.37738e-17	2.1286e-16	E2F7	25.7355	4.11474	4.67909e-146	2.90026e-145	AC010768.1	0.225062	2.15791	0.821931	0.99998
ACTB	16.2702	2.07206	1.60548e-59	1.00552e-58	AL078582.2	-0.10107	-0.215788	0.919495	0.999049	PLG	-0.0610497	-21.397	0.95132	0.999148	ATXN1	8.42079	0.892973	3.7396e-17	2.35195e-16	CD70	25.6552	4.12576	3.69918e-145	2.28815e-144	STXBP5-AS1	0.222587	1.60485	0.823857	0.99998
PTPRG	16.2659	1.55879	1.723e-59	1.07687e-58	AC011287.1	-0.10203	0.0835904	0.918732	0.999049	ALPK2	-0.0610497	-21.4254	0.95132	0.999148	ARHGAP29	8.37164	0.972798	5.6823e-17	3.56629e-16	HES6	25.581	2.96035	2.47949e-144	1.53055e-143	ATG9B	0.219475	0.184136	0.82628	0.99998
SMYD3	16.2498	1.17111	2.24116e-59	1.39781e-58	AC013652.1	-0.103413	0.385948	0.917635	0.999049	NAALADL2-AS2	-0.0610497	-21.6368	0.95132	0.999148	LONRF2	8.30243	0.905877	1.01999e-16	6.37496e-16	PLEKHG7	25.4392	4.96854	9.30202e-143	5.7302e-142	EDN2	0.21841	1.57109	0.82711	0.99998
GCNT2	16.2442	1.50468	2.45447e-59	1.52768e-58	AC068533.4	-0.103867	0.307423	0.917275	0.999049	ZBTB46-AS1	-0.0610497	-21.4789	0.95132	0.999148	PEAK1	8.2979	1.07127	1.05965e-16	6.60906e-16	DYDC1	25.4162	5.80994	1.67018e-142	1.02675e-141	MYRFL	0.217108	0.55718	0.828124	0.99998
C11orf49	16.2283	0.949825	3.17931e-59	1.97473e-58	FAM155A	-0.103886	0.368595	0.91726	0.999049	AC068987.2	-0.0610497	-21.4116	0.95132	0.999148	PRR15	8.28719	0.963932	1.15952e-16	7.21693e-16	SERPINA1	25.3433	2.81758	1.06499e-141	6.49381e-141	AC011472.1	0.214687	1.60917	0.830011	0.99998
AOPEP	16.1167	1.20382	1.94797e-58	1.19998e-57	AC003006.1	-0.104294	0.397896	0.916936	0.999049	DYSF	-0.0610497	-21.3949	0.95132	0.999148	SLC7A2	8.28449	0.786905	1.18613e-16	7.36724e-16	SLC6A6	25.1817	3.11908	6.3602e-140	3.8703e-139	AC017002.3	0.213435	1.86038	0.830988	0.99998
CLDN1	16.1038	1.01168	2.39859e-58	1.47454e-57	LINC02127	-0.105544	-21.8089	0.915944	0.999049	AC099845.1	-0.0623854	0.570316	0.950256	0.999148	RPS12	8.26991	1.52036	1.34061e-16	8.30956e-16	ANKUB1	25.1496	5.22035	1.42768e-139	8.67013e-139	SHROOM4	0.207152	0.43174	0.835891	0.99998
HES6	16.0861	1.05206	3.19335e-58	1.95911e-57	IL13RA2	-0.105544	-21.9585	0.915944	0.999049	DACT3-AS1	-0.0627086	-0.843458	0.949999	0.999148	APOL1	8.26063	0.869398	1.44909e-16	8.96343e-16	UMODL1-AS1	25.1357	6.20179	2.0267e-139	1.2283e-138	PTPRR	0.206146	0.689865	0.836677	0.99998
STAG1	16.0789	1.15325	3.58918e-58	2.19746e-57	AC084757.4	-0.105544	-21.8409	0.915944	0.999049	AL121768.1	-0.0627086	-1.01913	0.949999	0.999148	FBXW7	8.23339	1.06059	1.81993e-16	1.12341e-15	LUCAT1	25.0881	5.51584	6.7012e-139	4.05315e-138	TRPV4	0.205052	0.823709	0.837532	0.99998
CSTB	16.0459	2.7738	6.10723e-58	3.73151e-57	AC008758.1	-0.105995	0.456634	0.915586	0.999049	AP003392.1	-0.0627117	-0.961759	0.949996	0.999148	PBX3	8.22733	2.18055	1.91437e-16	1.17928e-15	CSTB	25.0615	2.6223	1.30766e-138	7.89329e-138	C2	0.204721	1.00552	0.83779	0.99998
RAPGEF2	15.9875	1.21336	1.56075e-57	9.51679e-57	C16orf89	-0.106068	-1.83316	0.915528	0.999049	AC022872.1	-0.0627117	-1.05904	0.949996	0.999148	CLU	8.20568	1.94567	2.29283e-16	1.40664e-15	MRVI1-AS1	24.9863	5.74975	8.62489e-138	5.19572e-137	AC079921.1	0.204233	0.971365	0.838171	0.99998
PRICKLE1	15.9737	1.70745	1.94958e-57	1.18636e-56	CACNA2D1	-0.106068	-1.70342	0.915528	0.999049	AC007610.2	-0.0627117	-1.1617	0.949996	0.999148	TGM2	8.20366	0.878974	2.33184e-16	1.42766e-15	FBXL13	24.9841	4.47144	9.10603e-138	5.47457e-137	GNAS-AS1	0.200742	0.95324	0.8409	0.99998
KANSL1	15.8999	1.33392	6.34502e-57	3.85325e-56	AL136038.5	-0.106585	-0.981173	0.915118	0.999049	LINC02158	-0.0627117	-1.0305	0.949996	0.999148	CHST6	8.17991	0.753848	2.84046e-16	1.73199e-15	FBXL2	24.97	3.62975	1.29544e-137	7.77264e-137	AP002884.2	0.199913	1.08862	0.841548	0.99998
F3	15.7514	1.3589	6.71403e-56	4.05273e-55	AL135818.1	-0.106585	-0.94839	0.915118	0.999049	MEF2C	-0.0627147	-1.31954	0.949994	0.999148	TCTN1	8.12472	0.925103	4.48405e-16	2.72863e-15	SERPINB1	24.9249	2.85082	3.99674e-137	2.39326e-136	RUSC2	0.198582	0.0975166	0.84259	0.99998
AQP5	15.7238	2.13118	1.03931e-55	6.2609e-55	SEC16B	-0.106585	-0.956557	0.915118	0.999049	AC023590.1	-0.0627178	-1.55063	0.949991	0.999148	SMYD3	8.11803	0.827875	4.73817e-16	2.87743e-15	MT-ND5	24.9178	1.88039	4.76797e-137	2.84938e-136	FGF13	0.192911	1.0838	0.847028	0.99998
PDE7B	15.6375	1.90429	4.04491e-55	2.42695e-54	AL021918.4	-0.106586	-0.97375	0.915117	0.999049	LINC00596	-0.0627239	-1.4638	0.949986	0.999148	THSD4	8.10988	0.730237	5.06687e-16	3.06464e-15	RABGAP1L	24.8236	2.83744	4.98638e-136	2.97398e-135	AL157829.1	0.191195	1.77931	0.848373	0.99998
AHNAK2	15.5279	1.2125	2.24448e-54	1.344e-53	LRRC31	-0.106606	-1.31501	0.915102	0.999049	AC245041.2	-0.0641968	0.560794	0.948814	0.999148	SMURF1	8.09634	1.0482	5.66349e-16	3.41861e-15	AHNAK2	24.8141	3.36379	6.31787e-136	3.76064e-135	H2BC8	0.187448	0.373551	0.85131	0.99998
AC024230.1	15.5019	1.01801	3.36643e-54	2.01181e-53	CASS4	-0.107093	-0.486914	0.914715	0.999049	MEGF11	-0.0643553	-0.403793	0.948687	0.999148	PRICKLE1	8.04264	1.12376	8.7925e-16	5.28607e-15	H2BC4	24.7312	4.32163	4.93396e-135	2.93106e-134	AL391117.1	0.187305	3.80042	0.851422	0.99998
SPATS2L	15.4994	0.989728	3.50202e-54	2.08868e-53	AL359094.1	-0.107093	-0.573039	0.914715	0.999049	LRRC31	-0.0643584	-0.44382	0.948685	0.999148	KRT18	8.03366	1.42095	9.4606e-16	5.67636e-15	CCDC148	24.6603	3.72318	2.85047e-134	1.69e-133	AP000424.1	0.186165	1.44236	0.852315	0.99998
ATP5IF1	15.4979	2.91085	3.58238e-54	2.13237e-53	NCR3LG1	-0.107096	-0.70612	0.914713	0.999049	SHANK2-AS1	-0.064369	-0.586237	0.948676	0.999148	CEP112	7.97992	0.971636	1.46428e-15	8.75067e-15	LAPTM5	24.6261	5.50371	6.6453e-134	3.92439e-133	AP002075.1	0.185801	3.12151	0.852601	0.99998
RFX7	15.4264	1.30272	1.0879e-53	6.46279e-53	AL118556.2	-0.107098	-0.621078	0.914711	0.999049	GRIK1	-0.0643706	-0.787816	0.948675	0.999148	CD70	7.97466	1.13665	1.52797e-15	9.11315e-15	RNF213-AS1	24.575	4.42286	2.33579e-133	1.37669e-132	PLB1	0.185169	0.595716	0.853096	0.99998
WNT2B	15.3686	2.77402	2.65856e-53	1.57311e-52	AC104964.4	-0.107593	-0.376712	0.914318	0.999049	LINC00877	-0.0643706	-0.401383	0.948675	0.999148	PAN3	7.94724	0.768679	1.90714e-15	1.1352e-14	LEKR1	24.4525	4.63292	4.7295e-132	2.77661e-131	PROCR	0.184587	1.53766	0.853553	0.99998
WDFY3	15.2052	1.2263	3.26522e-52	1.92072e-51	EDNRB-AS1	-0.107593	-0.273354	0.914318	0.999049	HTR3A	-0.0643797	-0.89103	0.948668	0.999148	PARD3B	7.91985	0.95894	2.37795e-15	1.40985e-14	ANKRD36C	24.4406	4.15947	6.32806e-132	3.70785e-131	RGS9BP	0.184425	3.73247	0.85368	0.99998
ARHGAP29	15.1728	1.2937	5.35346e-52	3.14293e-51	AL135924.2	-0.107593	-0.230923	0.914318	0.999049	AL161430.1	-0.0643889	-0.875695	0.948661	0.999148	CSPP1	7.91242	0.737592	2.52443e-15	1.49081e-14	EVI5	24.3793	2.81095	2.83894e-131	1.6602e-130	KLRD1	0.184366	3.20192	0.853727	0.99998
LCN2	15.1062	2.23545	1.47357e-51	8.63421e-51	SFMBT2	-0.108102	-0.178636	0.913915	0.999049	DSG3	-0.0644041	-0.949435	0.948648	0.999148	PLCE1	7.87171	0.826949	3.49837e-15	2.06191e-14	BBS9	24.3288	4.31492	9.70921e-131	5.66685e-130	LINC00881	0.18297	3.33434	0.854822	0.99998
DIP2C	15.1009	1.58371	1.59689e-51	9.33856e-51	SLC14A2	-0.108573	-0.0376752	0.913541	0.999049	CCDC60	-0.0649088	0.456532	0.948247	0.999148	CCND1	7.85129	1.42701	4.1179e-15	2.42229e-14	DHRS9	24.3116	5.07037	1.47883e-130	8.61452e-130	GATA3	0.18296	3.24504	0.854829	0.99998
SNTB1	14.9045	1.16731	3.08077e-50	1.79115e-49	AC128687.3	-0.108576	-0.0437995	0.913539	0.999049	PLAC1	-0.0659868	0.116093	0.947388	0.999148	C20orf96	7.8456	0.679142	4.30889e-15	2.52474e-14	IRF1	24.1478	2.9759	7.87954e-129	4.58113e-128	IL13RA2	0.182881	3.00342	0.854891	0.99998
CITED2	14.9019	0.900975	3.20549e-50	1.85646e-49	BHMT2	-0.109076	0.0601555	0.913142	0.999049	AL391244.1	-0.0659898	-0.1691	0.947386	0.999148	DANT2	7.79573	0.996094	6.40375e-15	3.73759e-14	H1-2	24.1403	3.01754	9.43354e-129	5.47401e-128	SATB2	0.18115	0.6067	0.856249	0.99998
IL4I1	14.8722	1.49476	4.99802e-50	2.88347e-49	AL391845.1	-0.113103	-1.77274	0.909949	0.999049	TEX52	-0.0659898	0.0191856	0.947386	0.999148	DOCK5	7.78996	1.1979	6.70327e-15	3.90482e-14	CCDC198	24.0798	5.64802	4.06872e-128	2.3564e-127	AC011676.3	0.178734	3.49632	0.858146	0.99998
SCGB2A1	14.6969	1.78192	6.74902e-49	3.87133e-48	LINC02492	-0.113103	-1.6772	0.909949	0.999049	AC073167.1	-0.065999	-0.146208	0.947379	0.999148	TBCK	7.77704	0.888492	7.42438e-15	4.3165e-14	MIR205HG	23.9841	4.91154	4.07484e-127	2.3554e-126	KLHL30	0.178616	2.85234	0.858239	0.99998
VPS8	14.6696	1.47846	1.00909e-48	5.77723e-48	CUX2	-0.113103	-1.97427	0.909949	0.999049	CYP2W1	-0.066002	-0.198656	0.947376	0.999148	H2BC4	7.76854	1.03035	7.93969e-15	4.60717e-14	RERE	23.9361	2.61957	1.2904e-126	7.44462e-126	NRIP3	0.176757	1.50072	0.859699	0.99998
PALM2AKAP2	14.6206	1.43089	2.07704e-48	1.18463e-47	RRH	-0.113618	-0.966306	0.90954	0.999049	ANGPTL1	-0.0660142	-0.270499	0.947367	0.999148	AKAP13	7.75636	0.74808	8.73992e-15	5.06173e-14	HSPA8	23.8468	2.72325	1.09402e-125	6.29952e-125	IL12RB2	0.175914	3.29499	0.860362	0.99998
C4orf19	14.6019	1.465	2.7315e-48	1.55199e-47	ANK2-AS1	-0.113618	-1.07621	0.90954	0.999049	FGF1	-0.0665997	-21.6861	0.9469	0.999148	TTC21B	7.74217	0.865634	9.77359e-15	5.64948e-14	RHEBL1	23.8182	5.74856	2.16536e-125	1.24446e-124	AC116535.2	0.172832	1.01671	0.862784	0.99998
ARID1B	14.4295	1.02508	3.37475e-47	1.91024e-46	AC090607.1	-0.113618	-0.978348	0.90954	0.999049	DENND5B-AS1	-0.0665997	-21.407	0.9469	0.999148	BMPR1B	7.72504	0.833453	1.11813e-14	6.45078e-14	ANXA1	23.8	1.85993	3.34176e-125	1.91688e-124	RUNX2	0.172585	0.306819	0.862978	0.99998
HHEX	14.3874	2.27988	6.20751e-47	3.50047e-46	POU3F1	-0.113618	-1.07432	0.90954	0.999049	CPNE9	-0.0665997	-21.4288	0.9469	0.999148	HERC5	7.72451	1.67055	1.12284e-14	6.46546e-14	VNN3	23.7767	5.71703	5.81999e-125	3.33206e-124	TUBA8	0.169986	2.3555	0.865021	0.99998
CCN1	14.3571	1.11844	9.61844e-47	5.40362e-46	AC018467.1	-0.113624	-1.03636	0.909536	0.999049	LINC02627	-0.0665997	-21.6715	0.9469	0.999148	SLC1A3	7.70367	0.728008	1.32209e-14	7.59824e-14	TCTEX1D4	23.775	5.50676	6.06579e-125	3.46616e-124	KMO	0.169942	1.58017	0.865056	0.99998
IK	14.2766	0.867725	3.06219e-46	1.71712e-45	AC004053.1	-0.113632	-1.30217	0.90953	0.999049	ACSBG2	-0.0665997	-21.423	0.9469	0.999148	CBLB	7.70223	0.734225	1.3371e-14	7.66978e-14	UTRN	23.7528	2.80718	1.02764e-124	5.86108e-124	AC006435.2	0.169927	2.16847	0.865067	0.99998
BLCAP	14.2751	0.775922	3.12648e-46	1.7499e-45	F2RL3	-0.114125	-0.647185	0.909138	0.999049	CD84	-0.0665997	-21.4402	0.9469	0.999148	BNIP3	7.69938	0.92267	1.36723e-14	7.82766e-14	CEP128	23.7484	4.26368	1.14161e-124	6.4987e-124	AL359878.1	0.166668	0.957097	0.867632	0.99998
BRAF	14.259	0.977362	3.93781e-46	2.1999e-45	AC012076.2	-0.114125	-0.678349	0.909138	0.999049	AC024560.3	-0.0665997	-21.4512	0.9469	0.999148	PITPNC1	7.68535	0.755305	1.52581e-14	8.70396e-14	ZFPM2-AS1	23.6481	2.70643	1.23606e-123	7.02306e-123	EFNA5	0.165972	0.0691113	0.868179	0.99998
AREG	14.2572	1.00601	4.04349e-46	2.25473e-45	AL442003.1	-0.114125	-0.515105	0.909138	0.999049	LARGE-AS1	-0.0665997	-21.8623	0.9469	0.999148	KIF9	7.68532	0.764247	1.52609e-14	8.70396e-14	TTLL5	23.5867	3.54886	5.28092e-123	2.99485e-122	AC008764.1	0.165967	1.03798	0.868183	0.99998
FAF1	14.226	0.829934	6.32381e-46	3.50673e-45	AL109761.1	-0.114125	-0.583117	0.909138	0.999049	FAM78B	-0.0665997	-21.4468	0.9469	0.999148	GAB2	7.68448	1.4112	1.53619e-14	8.74491e-14	ATF3	23.5264	2.87802	2.18836e-122	1.23869e-121	SUGCT	0.165884	0.947314	0.868249	0.99998
HSPA2	14.174	0.969193	1.32642e-45	7.34183e-45	CPEB2-DT	-0.114125	-0.694196	0.909138	0.999049	LRRC19	-0.0665997	-21.4419	0.9469	0.999148	IRF1	7.67507	0.78809	1.65322e-14	9.39332e-14	PTTG1	23.483	2.82715	6.09063e-122	3.44103e-121	PRKCB	0.16582	2.48083	0.868299	0.99998
UTRN	14.1237	0.85971	2.71379e-45	1.49658e-44	ARHGAP28	-0.114131	-0.705537	0.909134	0.999049	AC002069.2	-0.0665997	-21.5118	0.9469	0.999148	TM4SF1	7.64726	0.743792	2.053e-14	1.16427e-13	MRLN	23.2991	5.91194	4.52762e-120	2.54838e-119	AC011815.2	0.16578	2.48135	0.86833	0.99998
MDM2	14.0799	0.880195	5.05023e-45	2.77994e-44	PKIA-AS1	-0.114133	-0.65757	0.909132	0.999049	AL596223.1	-0.0665997	-21.5763	0.9469	0.999148	GSTP1	7.62477	1.47262	2.44462e-14	1.38114e-13	CLDN1	23.2471	2.70388	1.52334e-119	8.55809e-119	AL133352.1	0.162693	1.99166	0.87076	0.99998
KDM4C	14.0788	1.29656	5.1257e-45	2.81632e-44	AL606516.1	-0.114144	-0.80561	0.909124	0.999049	CALB2	-0.0665997	-21.6713	0.9469	0.999148	F3	7.61621	0.83958	2.61224e-14	1.47307e-13	EGLN3	23.1558	2.84454	1.26972e-118	7.11992e-118	AC008758.5	0.162082	0.777493	0.871241	0.99998
ANKRD1	14.0586	1.97925	6.82372e-45	3.74244e-44	METTL24	-0.114624	-0.342119	0.908743	0.999049	AL391117.1	-0.0665997	-21.4799	0.9469	0.999148	RPL37A	7.60178	1.4827	2.92095e-14	1.64098e-13	ANXA2	22.9894	1.40718	5.95685e-117	3.33406e-116	AC092647.5	0.160957	0.297426	0.872127	0.99998
MAML3	14.0333	1.50864	9.75006e-45	5.33762e-44	GPC5	-0.114627	-0.510314	0.908741	0.999049	ZBTB20-AS5	-0.0676182	0.0440692	0.94609	0.999148	EVA1C	7.58773	0.837901	3.2555e-14	1.82551e-13	CEP350	22.9888	2.59463	6.03204e-117	3.36985e-116	AC093827.5	0.160247	0.629554	0.872686	0.99998
ENO1	13.9819	2.28757	2.01016e-44	1.0905e-43	AL512656.2	-0.114635	-0.418433	0.908734	0.999049	SGSM1	-0.0676426	-0.0392841	0.94607	0.999148	IL32	7.57257	0.82035	3.65903e-14	2.04796e-13	CROCC	22.9348	4.61202	2.09024e-116	1.16556e-115	AC144831.1	0.160178	2.58585	0.872741	0.99998
MT1G	13.9462	2.27061	3.31866e-44	1.79064e-43	AC027601.1	-0.114643	-0.588045	0.908728	0.999049	AC003093.1	-0.0682571	-1.25298	0.945581	0.999148	XKR6	7.54252	0.959677	4.60979e-14	2.57052e-13	NWD1	22.7177	5.56206	2.99543e-114	1.66721e-113	AL355076.2	0.160139	2.33397	0.872772	0.99998
MIR31HG	13.8876	1.34056	7.53276e-44	4.04987e-43	AC110491.2	-0.115147	-0.384291	0.908328	0.999049	H2AC19	-0.0682571	-0.92545	0.945581	0.999148	TRPS1	7.49533	0.768624	6.61295e-14	3.67386e-13	SHANK2	22.7139	2.96104	3.26556e-114	1.8142e-113	PRR26	0.159932	0.571639	0.872935	0.99998
SLC39A11	13.8297	1.60085	1.68815e-43	9.05986e-43	LINC01482	-0.115599	-0.140582	0.907971	0.999049	TH	-0.0682601	-1.05175	0.945579	0.999148	TNRC6B	7.49494	0.709605	6.63307e-14	3.67823e-13	PLCE1	22.6353	2.9733	1.94768e-113	1.08004e-112	ARNILA	0.159853	1.98945	0.872997	0.99998
NUDC	13.7857	1.43954	3.10941e-43	1.66576e-42	S100A8	-0.115817	-0.729668	0.907798	0.999049	ZPBP	-0.0682601	-0.991651	0.945579	0.999148	VPS8	7.49448	0.999251	6.65594e-14	3.6841e-13	CCNO	22.5687	3.4836	8.79213e-113	4.8665e-112	SFTPD	0.156441	1.34022	0.875686	0.99998
IFT57	13.7738	0.999313	3.66498e-43	1.95988e-42	MIR181A1HG	-0.118437	0.629915	0.905721	0.999049	Z82215.1	-0.0682632	-1.13275	0.945576	0.999148	SNCB	7.46024	0.793689	8.63664e-14	4.77162e-13	CDC20B	22.5507	4.14229	1.32315e-112	7.31021e-112	IGFL2-AS1	0.155459	1.64129	0.876459	0.99998
LINC01480	13.7021	1.72792	9.86042e-43	5.25422e-42	TUBAL3	-0.119616	-22.0607	0.904787	0.999049	AL031727.2	-0.0682632	-1.25738	0.945576	0.999148	ZFPM2-AS1	7.44601	0.696685	9.62081e-14	5.30559e-13	CFAP97D2	22.4942	5.71146	4.72669e-112	2.60663e-111	RNF103-CHMP3	0.154448	0.387219	0.877256	0.99998
RIN2	13.5506	1.11438	7.85987e-42	4.16601e-41	AL157912.1	-0.119616	-21.9971	0.904787	0.999049	AC092794.2	-0.0682662	-1.28496	0.945574	0.999148	GCNT2	7.37157	0.905629	1.68625e-13	9.26514e-13	AC026704.1	22.4844	4.95598	5.90511e-112	3.25052e-111	SPDYE5	0.153531	1.0496	0.877979	0.99998
EHBP1	13.5326	1.22252	1.00445e-41	5.31453e-41	AL033529.1	-0.119616	-22.0455	0.904787	0.999049	AC011676.3	-0.0682662	-1.28197	0.945574	0.999148	VWA8	7.33884	0.785572	2.15454e-13	1.17949e-12	AC245041.2	22.4839	5.7909	5.96072e-112	3.27512e-111	RHOXF1-AS1	0.152525	0.639138	0.878773	0.99998
SH3D19	13.5028	0.766022	1.5054e-41	7.92313e-41	BANCR	-0.119616	-22.1288	0.904787	0.999049	AC084782.2	-0.0682693	-1.33209	0.945571	0.999148	CCNA1	7.33783	0.627277	2.17091e-13	1.18629e-12	EVA1C	22.4167	3.00407	2.70543e-111	1.48378e-110	FILIP1L	0.151726	0.792964	0.879403	0.99998
RUVBL2	13.379	1.19156	8.02551e-41	4.20184e-40	AL449403.3	-0.120138	-1.73664	0.904374	0.999049	AC114267.1	-0.0682754	-1.70691	0.945566	0.999148	C11orf74	7.31359	0.658458	2.60096e-13	1.41871e-12	CFAP58	22.1438	5.50585	1.19775e-108	6.54506e-108	AC083837.1	0.151056	0.200528	0.879932	0.99998
SPINK5	13.3529	2.34365	1.13949e-40	5.94514e-40	LINC02159	-0.120138	-1.88513	0.904374	0.999049	AC126121.3	-0.0691978	0.256864	0.944832	0.999148	RAPGEF2	7.2941	0.765316	3.00666e-13	1.63702e-12	SRGAP3-AS2	22.0851	6.00824	4.39609e-108	2.39787e-107	SLC22A17	0.149887	1.70841	0.880854	0.99998
TENM4	13.327	1.46069	1.61216e-40	8.39665e-40	TAGAP	-0.120141	-2.02953	0.904372	0.999049	AC006435.2	-0.0699083	-0.606596	0.944267	0.999148	SYNE1	7.28852	0.918928	3.13379e-13	1.70007e-12	BICC1	22.0117	3.60797	2.22381e-107	1.21078e-106	NFATC2	0.14786	0.112721	0.882453	0.99998
GPHN	13.3083	1.20401	2.07203e-40	1.07731e-39	AC092115.3	-0.120144	-2.0903	0.904369	0.999049	AC008277.1	-0.0699145	-0.637753	0.944262	0.999148	FAAH2	7.21634	0.84604	5.34051e-13	2.88676e-12	CCDC171	21.9661	4.29058	6.08e-107	3.30435e-106	SLC22A1	0.145691	1.91601	0.884166	0.99998
SPP1	13.2647	1.68122	3.70978e-40	1.91555e-39	LINC01973	-0.120144	-1.97582	0.904369	0.999049	IFITM10	-0.0715352	-0.126121	0.942972	0.999148	RPS8	7.21178	1.53759	5.52268e-13	2.97987e-12	CEP112	21.9048	3.088	2.33572e-106	1.26483e-105	IKZF2	0.145449	0.415828	0.884356	0.99998
CHI3L1	13.2068	2.04009	8.01752e-40	4.13274e-39	AC005753.3	-0.120655	-1.16834	0.903965	0.999049	LINC00488	-0.0717899	0.53281	0.942769	0.999148	H2BC5	7.14339	0.943403	9.10574e-13	4.8868e-12	PLAC8	21.8916	4.91036	3.12108e-106	1.68707e-105	AL132671.2	0.145375	1.29831	0.884415	0.99998
CA12	13.1641	1.32564	1.41249e-39	7.26837e-39	BICRA-AS1	-0.120657	-1.14065	0.903963	0.999049	AC010967.1	-0.0721497	-21.5551	0.942483	0.999148	ATP9B	7.12322	1.08782	1.05433e-12	5.64818e-12	SYNE2	21.8833	2.61187	3.74755e-106	2.02206e-105	AC092574.2	0.145148	1.49122	0.884594	0.99998
TMTC2	13.1422	1.4772	1.88607e-39	9.68871e-39	AC116667.1	-0.120657	-1.26422	0.903963	0.999049	FBXW12	-0.0721497	-21.7602	0.942483	0.999148	IGFBP3	7.09361	0.851467	1.30655e-12	6.97445e-12	CLDN4	21.8275	2.52786	1.27267e-105	6.85458e-105	AC009318.3	0.14392	1.23359	0.885563	0.99998
CIB1	13.065	2.16172	5.21612e-39	2.67037e-38	AL133480.1	-0.12066	-1.2694	0.90396	0.999049	RAB30	-0.0721497	-21.4841	0.942483	0.999148	MID1	7.07016	0.771708	1.54756e-12	8.24633e-12	CAT	21.7488	2.66895	7.09584e-105	3.81497e-104	AL138885.3	0.14362	0.632858	0.885801	0.99998
PLXDC2	13.0312	1.073	8.12726e-39	4.15362e-38	AC009060.1	-0.121158	-0.643003	0.903566	0.999049	LGALS2	-0.0721497	-21.6352	0.942483	0.999148	RPL13	7.06904	0.946734	1.56015e-12	8.29865e-12	MKX	21.6704	4.30627	3.9055e-104	2.09597e-103	AC063944.1	0.142791	1.89116	0.886455	0.99998
RUVBL1	13.005	0.896418	1.14579e-38	5.84588e-38	AC126182.3	-0.121158	-0.651157	0.903566	0.999049	XYLT1	-0.0721497	-21.6249	0.942483	0.999148	HPGD	7.06525	1.15646	1.60321e-12	8.4976e-12	RND3	21.5578	2.65442	4.47029e-103	2.3948e-102	LINC01409	0.142328	0.136473	0.886821	0.99998
VTI1A	12.9485	1.02818	2.39523e-38	1.2138e-37	AC104335.2	-0.121158	-0.693602	0.903566	0.999049	AL391839.1	-0.0721497	-21.6779	0.942483	0.999148	FTO	7.05649	0.867617	1.70756e-12	9.03473e-12	TMEM212	21.432	5.83256	6.72305e-102	3.59521e-101	ARHGAP31	0.141637	0.779803	0.887367	0.99998
ZSCAN31	12.9449	2.1285	2.51154e-38	1.2706e-37	AC007098.1	-0.121158	-0.562363	0.903566	0.999049	AL359704.3	-0.0721497	-21.6009	0.942483	0.999148	SELENOP	7.00772	0.908356	2.4223e-12	1.27938e-11	TM4SF1	21.4015	2.53285	1.29249e-101	6.89944e-101	PTCHD4	0.140917	0.360157	0.887935	0.99998
SCAF8	12.8983	1.17507	4.6027e-38	2.32069e-37	CYP2W1	-0.121163	-0.792683	0.903562	0.999049	AL645929.2	-0.0721497	-21.5743	0.942483	0.999148	LRBA	7.00002	0.594717	2.55927e-12	1.34935e-11	FAM162A	21.2543	2.65817	3.01093e-100	1.6044e-99	AC002553.2	0.13998	1.66538	0.888676	0.99998
SCEL	12.8775	1.31583	6.02244e-38	3.02635e-37	P4HA2-AS1	-0.121166	-0.784578	0.90356	0.999049	NPTX1	-0.0721497	-21.8051	0.942483	0.999148	IL17C	6.97547	1.33558	3.04844e-12	1.59883e-11	TNFSF10	21.1472	2.5783	2.92528e-99	1.556e-98	IL23R	0.138506	1.58339	0.889841	0.99998
ST6GALNAC5	12.7848	2.41693	1.99259e-37	9.96296e-37	AL133352.1	-0.121168	-0.889519	0.903558	0.999049	KCNMB2-AS1	-0.0721497	-21.5832	0.942483	0.999148	CD69	6.91229	0.889431	4.76885e-12	2.49243e-11	SFTA2	21.1169	3.69927	5.56432e-99	2.94929e-98	ZNF503	0.136006	0.997656	0.891817	0.99998
H4C3	12.7716	1.11164	2.36326e-37	1.17967e-36	PLAC1	-0.121176	-0.64833	0.903551	0.999049	PLA2G2F	-0.0721497	-21.6035	0.942483	0.999148	DMKN	6.89767	2.1197	5.28609e-12	2.75796e-11	BTG3	21.0627	2.59177	1.75083e-98	9.26367e-98	AC093425.1	0.135764	1.91376	0.892008	0.99998
FBXW7	12.715	1.22235	4.88263e-37	2.42917e-36	AL450998.3	-0.121655	-0.43202	0.903172	0.999049	LINC02631	-0.0721497	-21.5788	0.942483	0.999148	PPM1H	6.83742	0.812236	8.06291e-12	4.19943e-11	STXBP4	21.0553	3.53625	2.0442e-98	1.07968e-97	AC080005.1	0.134201	1.51496	0.893244	0.99998
ZSWIM6	12.712	1.11229	5.06909e-37	2.51776e-36	CFAP44-AS1	-0.121655	-0.401592	0.903172	0.999049	CNOT10-AS1	-0.0721497	-21.53	0.942483	0.999148	PRSS1	6.83437	1.35054	8.2368e-12	4.28257e-11	AC105052.5	20.9096	5.43771	4.38227e-97	2.31051e-96	B4GALT4-AS1	0.132884	1.56867	0.894285	0.99998
NRXN3	12.6792	1.34398	7.70979e-37	3.82304e-36	TNXB	-0.121663	-0.498624	0.903166	0.999049	AC005899.6	-0.0721497	-21.7591	0.942483	0.999148	RIN2	6.81791	0.7647	9.23738e-12	4.79449e-11	UBE2S	20.8614	2.47214	1.20223e-96	6.32755e-96	SST	0.132855	1.67321	0.894308	0.99998
FTO	12.6701	1.19254	8.66106e-37	4.28765e-36	APOA1-AS	-0.121669	-0.468837	0.903161	0.999049	AL589693.1	-0.0721497	-21.598	0.942483	0.999148	AC097376.3	6.81351	1.49573	9.52434e-12	4.93489e-11	CNIH2	20.7801	5.40962	6.54725e-96	3.43387e-95	CXCL14	0.130281	2.0166	0.896344	0.99998
MBD5	12.6031	1.03315	2.03035e-36	1.00347e-35	AL590006.1	-0.121671	-0.641595	0.903159	0.999049	AL157834.1	-0.0721497	-21.5536	0.942483	0.999148	ANK3	6.77613	0.623409	1.23438e-11	6.37373e-11	LINC02345	20.6994	5.89408	3.50918e-95	1.83406e-94	LINC02680	0.129443	0.751333	0.897008	0.99998
IRF1	12.5991	0.903406	2.13571e-36	1.05207e-35	LINC01250	-0.122145	-0.19284	0.902784	0.999049	ANGPT1	-0.0731408	0.153661	0.941694	0.999148	DPYD	6.74514	1.28147	1.52879e-11	7.88036e-11	TLE4	20.6987	4.62148	3.55646e-95	1.85555e-94	AC011476.3	0.128984	0.418876	0.89737	0.99998
MCM7	12.5771	0.831632	2.82045e-36	1.38483e-35	AL445248.1	-0.122158	-0.340885	0.902774	0.999049	AL359844.1	-0.0738116	-1.12333	0.94116	0.999148	AK9	6.74156	0.59784	1.56698e-11	8.04953e-11	LRRC36	20.6816	6.51288	5.07332e-95	2.64235e-94	PLAT	0.127189	0.4485	0.898791	0.99998
SPTBN1	12.4988	0.962336	7.57754e-36	3.70238e-35	HECW1	-0.124067	0.0372087	0.901262	0.999049	CACNA1C-AS1	-0.0738116	-1.27527	0.94116	0.999148	THSD7A	6.74016	0.673191	1.58211e-11	8.11337e-11	MUC12	20.571	5.89663	4.99682e-94	2.598e-93	ITPRID1	0.127135	1.80956	0.898834	0.99998
IFT88	12.4352	0.681016	1.68398e-35	8.21452e-35	AC008056.1	-0.124083	-0.00261696	0.90125	0.999049	CYP4F26P	-0.0738147	-1.18846	0.941158	0.999148	LTF	6.73748	0.721362	1.61153e-11	8.25016e-11	MT-ND4	20.52	1.57557	1.42852e-93	7.41444e-93	AL353576.1	0.124166	1.25914	0.901184	0.99998
PIBF1	12.3911	0.698393	2.91853e-35	1.41676e-34	XAGE2	-0.126653	-22.1923	0.899215	0.999049	DPP9-AS1	-0.0738147	-1.50628	0.941158	0.999148	CKB	6.72434	0.676823	1.76394e-11	9.01503e-11	UBE2T	20.5058	2.45008	1.90995e-93	9.89609e-93	AC068533.4	0.121198	1.30859	0.903534	0.99998
B9D1	12.3701	0.669995	3.79496e-35	1.83924e-34	AL360227.1	-0.126653	-22.1223	0.899215	0.999049	P2RY12	-0.0738177	-1.37197	0.941155	0.999148	CDS1	6.68973	0.54161	2.23581e-11	1.14072e-10	ANK3	20.4337	2.2611	8.38785e-93	4.33854e-92	AC093152.1	0.11998	1.37976	0.904499	0.99998
PLCE1	12.3645	0.893433	4.06759e-35	1.96819e-34	EWSAT1	-0.127173	-2.02899	0.898803	0.999049	LINC01619	-0.0748195	-0.108694	0.940358	0.999148	UBE2D2	6.67293	1.77936	2.50742e-11	1.27713e-10	RALGAPA2	20.3734	2.27774	2.87979e-92	1.48443e-91	AC008269.1	0.11927	1.13281	0.905062	0.99998
IQCK	12.3061	0.701968	8.40284e-35	4.04631e-34	AL022328.1	-0.127173	-1.88155	0.898803	0.999049	KIAA1614	-0.0754461	-0.422274	0.93986	0.999148	SLC2A1	6.66365	1.02978	2.67109e-11	1.35818e-10	CHCHD2	20.2377	2.34095	4.56405e-91	2.34857e-90	KPNA7	0.118387	1.14783	0.905761	0.99998
JAZF1	12.2623	1.0771	1.44282e-34	6.91446e-34	ACKR4	-0.127173	-2.08608	0.898803	0.999049	AC005753.3	-0.0754553	-0.548274	0.939852	0.999148	LAMB3	6.64659	1.02212	2.99951e-11	1.52259e-10	ANXA8	20.1806	5.47381	1.4507e-90	7.45225e-90	POF1B	0.117189	1.52731	0.906711	0.99998
UBB	12.2283	2.92156	2.19374e-34	1.0463e-33	AC004554.2	-0.127176	-2.15426	0.898801	0.999049	RIPOR3	-0.0754583	-0.603597	0.93985	0.999148	AGAP1	6.63018	0.554257	3.35281e-11	1.69619e-10	HMGB2	20.1318	2.47518	3.8898e-90	1.99477e-89	AC027644.4	0.117031	1.1563	0.906836	0.99998
TNFAIP3	12.1436	1.24319	6.20006e-34	2.94307e-33	KIAA2012-AS1	-0.127176	-2.00198	0.898801	0.999049	USP12-AS2	-0.0754614	-0.766415	0.939848	0.999148	FAM160A1	6.61315	0.915161	3.76234e-11	1.90017e-10	GSTA3	19.9502	5.02021	1.4921e-88	7.63874e-88	AP001011.2	0.116868	0.750148	0.906965	0.99998
KCNMA1	12.1153	1.96573	8.76934e-34	4.14953e-33	AC007493.2	-0.127176	-2.00682	0.898801	0.999049	CECR2	-0.0754614	-0.716794	0.939848	0.999148	LGR5	6.61258	0.886143	3.77676e-11	1.90425e-10	LINC00271	19.8191	3.75858	2.03575e-87	1.03865e-86	ABL2	0.116316	0.00724425	0.907402	0.99998
ATAD2B	12.0771	1.30624	1.39561e-33	6.58308e-33	TGFB2-AS1	-0.127178	-2.05967	0.898799	0.999049	PINCR	-0.0754675	-0.841827	0.939843	0.999148	EVI5	6.57051	0.608938	5.01433e-11	2.51976e-10	TRIM29	19.8026	5.17488	2.83006e-87	1.44146e-86	AC093817.2	0.114023	1.02474	0.90922	0.99998
SPAG1	12.0203	0.650814	2.77994e-33	1.30513e-32	SPRR1B	-0.127184	-2.39323	0.898795	0.999049	AL512785.2	-0.0754705	-0.696277	0.93984	0.999148	GAB1	6.52959	1.46017	6.59482e-11	3.30291e-10	CCN1	19.7692	2.63097	5.48159e-87	2.78725e-86	GPC5-AS1	0.113924	0.932764	0.909298	0.99998
SMURF1	11.9529	1.16651	6.26633e-33	2.93276e-32	NCAM1	-0.127686	-1.27083	0.898398	0.999049	AL117334.2	-0.0770715	0.0249377	0.938567	0.999148	TTLL5	6.52908	0.861095	6.6176e-11	3.3088e-10	PRUNE2	19.7274	3.69978	1.25451e-86	6.35732e-86	AC091078.1	0.111212	1.3159	0.911448	0.99998
DANT2	11.9037	1.1608	1.1327e-32	5.28477e-32	AC026254.2	-0.127686	-1.08517	0.898398	0.999049	AC004805.1	-0.0770989	-0.36813	0.938545	0.999148	TNRC6C	6.5049	1.39162	7.77463e-11	3.88085e-10	IDI1	19.7034	2.24792	2.01738e-86	1.0206e-85	NBPF20	0.107741	0.336248	0.914202	0.99998
CXCL8	11.7989	0.709552	3.95549e-32	1.83692e-31	AC017002.4	-0.127686	-1.09686	0.898398	0.999049	AC023424.3	-0.0771538	-0.684709	0.938501	0.999148	ENO1	6.50241	1.60398	7.90449e-11	3.93911e-10	SCGB2A1	19.6712	2.29346	3.80748e-86	1.91974e-85	AC105233.5	0.107252	1.22329	0.914589	0.99998
BANK1	11.7675	1.47427	5.7379e-32	2.66054e-31	AL354710.2	-0.127686	-0.989953	0.898398	0.999049	LINC02408	-0.0776997	-21.7846	0.938067	0.999148	KLK7	6.47826	0.631194	9.2786e-11	4.61622e-10	LINC01588	19.5871	5.05217	1.99064e-85	1.002e-84	AC005480.1	0.106735	0.695555	0.915	0.99998
FER	11.7481	0.886113	7.22498e-32	3.33974e-31	SCUBE3	-0.127688	-1.18442	0.898396	0.999049	IGLC2	-0.0776997	-21.6569	0.938067	0.999148	GLIS3	6.46757	0.586894	9.95922e-11	4.94663e-10	MYLK	19.5185	4.29391	7.65103e-85	3.84474e-84	AP000943.2	0.106592	0.724948	0.915113	0.99998
FAAH2	11.6859	1.00537	1.50472e-31	6.91295e-31	AC023389.2	-0.12819	-0.869346	0.897999	0.999049	AL133259.1	-0.0776997	-21.7619	0.938067	0.999148	Z94721.1	6.41111	2.55797	1.44467e-10	7.16367e-10	AL133331.1	19.4746	5.45617	1.80249e-84	9.04258e-84	RBFOX1	0.105739	1.46637	0.91579	0.99998
NHSL1	11.6317	0.850917	2.84527e-31	1.30517e-30	AL157886.1	-0.12819	-0.758244	0.897999	0.999049	AC084864.2	-0.0776997	-21.6118	0.938067	0.999148	HSP90AA1	6.35113	1.23548	2.13739e-10	1.05811e-09	MT2A	19.1275	2.51444	1.48918e-81	7.45835e-81	TSNAX-DISC1	0.105236	0.78433	0.916189	0.99998
PPM1H	11.5206	0.9855	1.03824e-30	4.74807e-30	C6orf47-AS1	-0.12819	-0.761125	0.897999	0.999049	AC011442.1	-0.0776997	-21.6895	0.938067	0.999148	KLF12	6.34618	1.14955	2.20721e-10	1.09088e-09	KIAA0825	19.0374	3.31253	8.35495e-81	4.17748e-80	RCAN1	0.105171	0.104914	0.91624	0.99998
PCM1	11.4332	1.36426	2.8532e-30	1.29691e-29	MRAP	-0.128193	-0.779286	0.897997	0.999049	LINC02801	-0.0776997	-21.5271	0.938067	0.999148	MARK1	6.33784	0.999983	2.33016e-10	1.14975e-09	RFX3-AS1	18.9214	2.85141	7.60367e-80	3.79551e-79	Z83844.1	0.104185	1.17126	0.917022	0.99998
PROM1	11.4012	0.79945	4.1254e-30	1.87234e-29	DLEU7	-0.128193	-0.826074	0.897997	0.999049	PRSS56	-0.0776997	-21.6673	0.938067	0.999148	PLCH1	6.31692	0.833108	2.66823e-10	1.3101e-09	LRBA	18.9012	2.10465	1.11427e-79	5.55282e-79	NTNG1	0.103475	0.558979	0.917586	0.99998
CKS1B	11.3973	0.736177	4.31174e-30	1.95396e-29	AC005154.4	-0.128195	-0.914307	0.897994	0.999049	MC1R	-0.0776997	-21.6335	0.938067	0.999148	VPS13B	6.30976	0.825241	2.79475e-10	1.36997e-09	NCALD	18.8555	2.13237	2.64621e-79	1.31652e-78	AL049828.2	0.102592	0.845554	0.918286	0.99998
CCL2	11.368	1.51123	6.03363e-30	2.72604e-29	AC004083.1	-0.129175	-0.288984	0.897219	0.999049	KLRD1	-0.0776997	-21.81	0.938067	0.999148	ARHGEF3	6.27229	0.703759	3.55767e-10	1.73545e-09	LINC00488	18.7476	5.74053	2.02466e-78	1.00562e-77	AKT3	0.102523	0.980341	0.918341	0.99998
CLASP1	11.3	1.02515	1.31281e-29	5.91357e-29	AC011092.2	-0.12918	-0.401639	0.897215	0.999049	HTR3B	-0.0776997	-21.719	0.938067	0.999148	RPS23	6.25883	1.3763	3.87868e-10	1.88591e-09	PEAK1	18.6365	2.70712	1.62473e-77	8.05652e-77	GIPR	0.102435	-0.00825066	0.918412	0.99998
MFAP5	11.2967	2.38246	1.36196e-29	6.12574e-29	AL356277.3	-0.129185	-0.307965	0.897211	0.999049	MIR155HG	-0.0776997	-21.6589	0.938067	0.999148	LINC01572	6.23865	2.31992	4.41373e-10	2.14259e-09	MT-CO1	18.6293	0.843985	1.85942e-77	9.20507e-77	FSIP1	0.100551	0.328745	0.919907	0.99998
XKR6	11.2688	1.0458	1.87181e-29	8.40634e-29	AC009318.3	-0.129668	-0.268142	0.896829	0.999049	AC015687.1	-0.0776997	-21.6183	0.938067	0.999148	BLCAP	6.20543	0.502434	5.45464e-10	2.64361e-09	CDC14A	18.6034	3.2637	3.01601e-77	1.49061e-76	BICC1	0.0988004	0.107009	0.921297	0.99998
CCL20	11.189	0.648261	4.61446e-29	2.06927e-28	AC005258.1	-0.131051	0.547128	0.895735	0.999049	SMTNL1	-0.0776997	-21.6046	0.938067	0.999148	DIS3L2	6.18612	0.734792	6.16638e-10	2.98373e-09	LAMB3	18.4191	2.10626	9.2309e-76	4.55472e-75	AQP7	0.0966159	0.64658	0.923031	0.99998
CLMN	11.126	0.565998	9.37827e-29	4.19297e-28	AP000446.1	-0.131884	0.610531	0.895076	0.999049	TEX46	-0.0786938	-0.0709693	0.937276	0.999148	PALM2AKAP2	6.1822	0.759785	6.32152e-10	3.05387e-09	H2BC11	18.3386	3.22617	4.07518e-75	2.00748e-74	FSIP2-AS1	0.096537	0.533426	0.923094	0.99998
APBB2	11.0728	1.0863	1.69914e-28	7.57419e-28	AC007938.3	-0.134719	-1.22577	0.892834	0.999049	AL391845.1	-0.079357	-1.14411	0.936749	0.999148	ALPP	6.1288	0.735208	8.85455e-10	4.26383e-09	FGF14	18.1975	2.87187	5.39719e-74	2.65001e-73	UBAP1L	0.0963496	0.370914	0.923243	0.99998
ATXN1	11.0435	0.770322	2.35674e-28	1.04744e-27	AC116552.1	-0.134722	-1.39991	0.892832	0.999049	AL163636.2	-0.079357	-1.3605	0.936749	0.999148	C15orf41	6.09097	1.49414	1.12231e-09	5.3871e-09	S100A11	18.1679	1.69463	9.26705e-74	4.54267e-73	AC025178.2	0.0963101	0.368029	0.923274	0.99998
FAM160A1	11.0079	1.16126	3.50089e-28	1.55135e-27	AC011815.2	-0.134722	-1.28823	0.892832	0.999049	LINC02492	-0.079357	-1.10698	0.936749	0.999148	CD74	6.07724	1.63694	1.2227e-09	5.85961e-09	ZBED2	18.1405	3.2686	1.52669e-73	7.45942e-73	CUBN	0.0938594	0.431514	0.925221	0.99998
DIAPH2	10.995	0.805525	4.04068e-28	1.78791e-27	AC006111.1	-0.134722	-1.25232	0.892832	0.999049	GASK1A	-0.079357	-1.24461	0.936749	0.999148	KRT16	6.06909	1.00163	1.28639e-09	6.15497e-09	AOPEP	18.0749	2.27279	5.02353e-73	2.4505e-72	LINC00598	0.0921187	0.487424	0.926604	0.99998
AGR3	10.9235	0.61798	8.8959e-28	3.92466e-27	RBP2	-0.135222	-0.80155	0.892436	0.999049	AC123595.3	-0.0793601	-1.21054	0.936746	0.999148	DZIP3	6.06316	0.494119	1.33473e-09	6.37609e-09	IFI6	18.0259	2.36182	1.22011e-72	5.94211e-72	TMLHE-AS1	0.0905999	0.359745	0.927811	0.99998
IFIT2	10.8858	1.77261	1.34665e-27	5.93239e-27	ARNILA	-0.135222	-0.725353	0.892436	0.999049	AC130814.1	-0.0793601	-1.57258	0.936746	0.999148	ALDH3A1	6.05416	1.29352	1.41152e-09	6.73222e-09	KLHL6	17.9991	5.39855	1.97876e-72	9.62119e-72	AC005532.1	0.0904717	0.330726	0.927912	0.99998
ENPP3	10.876	1.36318	1.5e-27	6.59824e-27	NT5DC4	-0.135222	-0.78744	0.892436	0.999049	AC092111.1	-0.0793601	-1.34087	0.936746	0.999148	SPON1	6.03841	2.24364	1.55636e-09	7.38779e-09	USP2-AS1	17.9974	5.01769	2.04109e-72	9.90823e-72	AC114956.2	0.0897468	0.0141998	0.928488	0.99998
PTBP2	10.8712	1.22841	1.58136e-27	6.94594e-27	LINC01995	-0.135233	-0.849334	0.892428	0.999049	CAPS2-AS1	-0.0803069	0.0864262	0.935993	0.999148	DENND1A	6.0221	0.81	1.72164e-09	8.15943e-09	USP13	17.9913	3.33635	2.2787e-72	1.10438e-71	TBC1D10A	0.0879962	0.702867	0.92988	0.99998
IFIT3	10.8681	1.1505	1.63611e-27	7.17592e-27	AL359922.1	-0.135717	-0.585736	0.892045	0.999049	ANO3	-0.0809931	-0.35538	0.935447	0.999148	LRRC23	6.01136	0.491552	1.83977e-09	8.6918e-09	AC023300.2	17.9795	5.3953	2.82046e-72	1.36474e-71	ADAMTS7	0.0879469	0.543635	0.929919	0.99998
SERPINA1	10.5832	1.9921	3.56451e-26	1.54531e-25	TTC21B-AS1	-0.135717	-0.484065	0.892045	0.999049	MORC2-AS1	-0.0809931	-0.346854	0.935447	0.999148	TACR1	6.00502	0.863637	1.91314e-09	9.02423e-09	NEK2	17.9223	3.06251	7.89641e-72	3.81469e-71	PLG	0.0864972	3.41754	0.931071	0.99998
PTGS1	10.5036	2.55616	8.31284e-26	3.58312e-25	PCP4L1	-0.136207	-0.426176	0.891658	0.999049	AL672310.1	-0.0809992	-0.645612	0.935443	0.999148	UBASH3B	5.95	1.48497	2.68139e-09	1.26084e-08	NFKBIZ	17.9157	2.15285	8.89529e-72	4.29033e-71	GZMM	0.0864775	2.76454	0.931087	0.99998
ELF3	10.4778	0.659586	1.09252e-25	4.70238e-25	AC124944.3	-0.136207	-0.384525	0.891658	0.999049	SCUBE3	-0.0810022	-0.69185	0.93544	0.999148	SUPT3H	5.9115	1.03178	3.39014e-09	1.58913e-08	GADD45A	17.9082	2.26095	1.0174e-71	4.89919e-71	NAALADL2-AS2	0.0864676	2.58005	0.931095	0.99998
MARK1	10.3551	1.28316	3.96774e-25	1.6884e-24	CACNA1C	-0.13622	-0.419673	0.891647	0.999049	NCAM1	-0.0810083	-0.794774	0.935435	0.999148	RAD51B	5.9043	0.942973	3.54146e-09	1.65747e-08	HRH1	17.868	2.27202	2.09543e-71	1.00742e-70	AC005920.1	0.0864281	2.30608	0.931126	0.99998
MYO1E	10.3113	0.620025	6.2674e-25	2.65193e-24	LINC01342	-0.136683	-0.25711	0.891281	0.999049	AL589740.1	-0.0810144	-0.711087	0.93543	0.999148	GADD45B	5.89037	0.667866	3.85339e-09	1.79785e-08	MT-CYB	17.8235	1.57282	4.64022e-71	2.22731e-70	DSCAML1	0.0862605	-0.0764616	0.931259	0.99998
AUTS2	10.2647	1.05649	1.01666e-24	4.28971e-24	AC087857.1	-0.139449	0.220276	0.889095	0.999049	PLAC4	-0.0815298	0.530696	0.935021	0.999148	DGKH	5.88794	0.596046	3.9104e-09	1.82161e-08	SLC22A23	17.7633	3.5982	1.35927e-70	6.51409e-70	AC069368.1	0.0850671	3.27834	0.932208	0.99998
H3-3B	10.1947	1.68747	2.09488e-24	8.81435e-24	AC025580.2	-0.139843	0.300653	0.888784	0.999049	AL590101.1	-0.082623	-0.296778	0.934151	0.999148	RPS18	5.87163	1.51435	4.31537e-09	2.00715e-08	AC008014.1	17.7366	2.82492	2.18851e-70	1.04713e-69	LINC02101	0.0850178	2.34214	0.932247	0.99998
SIK3	10.1861	0.780943	2.28769e-24	9.61214e-24	AC025178.2	-0.140334	0.210557	0.888396	0.999049	AC010333.2	-0.082623	-0.162922	0.934151	0.999148	SQLE	5.85961	0.541868	4.63942e-09	2.15453e-08	TNRC6B	17.6417	2.08317	1.17914e-69	5.61496e-69	LRRC19	0.0849883	1.94338	0.932271	0.99998
SCGB3A1	10.1338	2.50261	3.91094e-24	1.64095e-23	AL359813.1	-0.140725	-22.3306	0.888087	0.999049	AL159169.2	-0.0832496	-21.793	0.933653	0.999148	ERICH2	5.80994	0.55941	6.24968e-09	2.88891e-08	EXOC4	17.6285	1.98445	1.48758e-69	7.0725e-69	ACSBG2	0.0849784	1.95292	0.932279	0.99998
GMDS-DT	10.1081	0.757325	5.0873e-24	2.12858e-23	H1-8	-0.140725	-22.1803	0.888087	0.999049	AC092535.4	-0.0832496	-21.929	0.933653	0.999148	SPATA6	5.80503	0.426071	6.43554e-09	2.97025e-08	DUSP6	17.599	2.20292	2.50923e-69	1.19109e-68	AC103796.1	0.0848798	0.322516	0.932357	0.99998
DIS3L2	10.0972	0.884553	5.68329e-24	2.37463e-23	AC104024.3	-0.141243	-2.0687	0.887678	0.999049	AC097500.1	-0.0832496	-21.845	0.933653	0.999148	SAMHD1	5.80219	0.470036	6.54536e-09	3.01629e-08	TASP1	17.592	2.52244	2.83741e-69	1.34475e-68	AL731577.2	0.0842979	0.334968	0.93282	0.99998
SLC44A4	9.96258	0.460403	2.22223e-23	9.23364e-23	AC006511.5	-0.141243	-2.05418	0.887678	0.999049	LINC02398	-0.0832496	-21.9558	0.933653	0.999148	RPL30	5.77067	1.4291	7.89558e-09	3.63294e-08	FAF1	17.563	2.04369	4.73392e-69	2.24003e-68	RAB30	0.0836273	2.62543	0.933353	0.99998
ATG7	9.93148	0.788833	3.037e-23	1.26016e-22	AL391863.1	-0.141251	-2.30604	0.887672	0.999049	EMILIN3	-0.0832496	-21.7638	0.933653	0.999148	PECAM1	5.76377	0.662635	8.22561e-09	3.779e-08	LKAAEAR1	17.5047	5.61629	1.31953e-68	6.22418e-68	KCNMB2-AS1	0.0836273	2.96786	0.933353	0.99998
EDN1	9.8128	2.01868	9.91785e-23	4.1096e-22	AC104123.1	-0.141491	0.434988	0.887482	0.999049	DIO2	-0.0832496	-21.8981	0.933653	0.999148	MRTFA	5.74916	1.0234	8.96866e-09	4.10778e-08	H4C8	17.4315	4.33228	4.75587e-68	2.23981e-67	NPTX1	0.0836075	2.66668	0.933368	0.99998
TMC5	9.78743	0.415907	1.27497e-22	5.26123e-22	BRWD1-AS1	-0.141753	-1.17977	0.887275	0.999049	BIRC6-AS1	-0.0832496	-21.632	0.933653	0.999148	EXOC6B	5.74428	0.80612	9.23129e-09	4.22163e-08	GMDS-DT	17.4154	2.36644	6.30071e-68	2.96272e-67	LGALS2	0.0835484	2.08712	0.933416	0.99998
BCL2	9.76069	1.23409	1.66021e-22	6.83215e-22	CMTM2	-0.141753	-1.2069	0.887275	0.999049	GAS1RR	-0.0832496	-21.8215	0.933653	0.999148	RESF1	5.70566	0.937823	1.15892e-08	5.28383e-08	SYTL2	17.3984	4.59335	8.48357e-68	3.9829e-67	PCAT19	0.0834596	0.0832576	0.933486	0.99998
TRAPPC9	9.7409	0.722717	2.01763e-22	8.28029e-22	AL031587.2	-0.142254	-0.787645	0.886879	0.999049	ST8SIA6-AS1	-0.0832496	-21.6969	0.933653	0.999148	TTC28	5.70166	0.633916	1.18645e-08	5.40112e-08	WWOX	17.3566	2.65764	1.75864e-67	8.24364e-67	ARPC3	0.082858	1.12136	0.933964	0.99998
HSPH1	9.73137	0.547975	2.21593e-22	9.08168e-22	CORO2B	-0.142257	-0.7835	0.886877	0.999049	CALML3-AS1	-0.0834204	0.279374	0.933517	0.999148	IQCK	5.69854	0.485737	1.2084e-08	5.49272e-08	MT-ATP6	17.3539	2.193	1.84374e-67	8.62906e-67	ZNF503-AS1	0.0821874	2.30558	0.934498	0.99998
DOCK5	9.61879	1.10491	6.66115e-22	2.71884e-21	AC010333.2	-0.142273	-0.92089	0.886864	0.999049	AL109955.2	-0.0834387	0.273697	0.933503	0.999148	TASP1	5.68551	0.66726	1.3042e-08	5.91919e-08	S100A4	17.3202	2.05033	3.31086e-67	1.54713e-66	LRIG2-DT	0.0818619	0.309385	0.934757	0.99998
INVS	9.61729	1.12281	6.75894e-22	2.755e-21	AC025279.1	-0.142754	-0.53036	0.886485	0.999049	C1orf137	-0.0842255	0.154592	0.932877	0.999148	KYNU	5.68203	1.18103	1.33108e-08	6.0321e-08	TRAPPC9	17.222	2.33884	1.81466e-66	8.45337e-66	AC116366.3	0.0816203	1.13024	0.934949	0.99998
FARS2	9.57501	0.811946	1.01846e-21	4.12331e-21	DOCK10	-0.142756	-0.424244	0.886483	0.999049	SCIMP	-0.0842529	-0.183611	0.932855	0.999148	FBXL7	5.65484	0.593319	1.55989e-08	7.05832e-08	PAN3	17.2108	2.06077	2.20187e-66	1.02413e-65	CD36	0.0807672	2.68065	0.935627	0.99998
CTXN1	9.52223	0.473179	1.69501e-21	6.8347e-21	AL356317.2	-0.143242	-0.371593	0.886099	0.999049	TAGAP	-0.0849024	-1.28853	0.932339	0.999148	ENTPD1-AS1	5.65068	1.01562	1.59818e-08	7.22069e-08	RAPGEF2	17.1994	2.20109	2.68499e-66	1.2469e-65	AC092535.4	0.0807277	2.11907	0.935658	0.99998
RANBP17	9.4212	0.981668	4.45958e-21	1.7886e-20	TMEM252-DT	-0.143295	-0.632299	0.886057	0.999049	LINC02159	-0.0849055	-1.28502	0.932337	0.999148	PODXL	5.64791	0.738122	1.62411e-08	7.32679e-08	IGFBP5	17.1871	3.71019	3.31578e-66	1.53745e-65	CNTNAP2	0.0804122	1.49919	0.935909	0.99998
TRAF3IP1	9.3459	0.425551	9.11074e-21	3.63944e-20	AC008770.2	-0.144182	-0.20966	0.885357	0.999049	MIR646HG	-0.0849085	-1.58395	0.932334	0.999148	HRH1	5.63218	0.533578	1.77951e-08	8.00377e-08	ALG1L	17.1797	4.97096	3.76596e-66	1.7435e-65	MEIS1-AS3	0.07985	0.821157	0.936357	0.99998
GJA4	9.25826	3.02289	2.07801e-20	8.24606e-20	AC104211.1	-0.144195	-0.16027	0.885347	0.999049	C12orf40	-0.0849116	-1.4353	0.932332	0.999148	GMDS-DT	5.62971	0.579328	1.80516e-08	8.10703e-08	TPM1	17.1758	1.94008	4.03277e-66	1.86415e-65	FABP3	0.0793372	2.49077	0.936764	0.99998
PCNX2	9.23734	1.17137	2.52699e-20	1.00013e-19	AC005699.1	-0.144689	-0.0761325	0.884957	0.999049	AL034351.4	-0.0849116	-1.42818	0.932332	0.999148	CCDC148	5.56155	0.743713	2.67391e-08	1.19194e-07	CDKL2	17.1561	5.42886	5.66012e-66	2.61237e-65	MCHR2-AS1	0.0793372	2.49404	0.936764	0.99998
KYNU	9.21449	1.54008	3.1275e-20	1.2313e-19	AC005753.2	-0.148278	-2.17878	0.882123	0.999049	CCDC194	-0.0849116	-1.52322	0.932332	0.999148	MORN2	5.54827	0.652544	2.88508e-08	1.28416e-07	TMEM40	17.0966	5.38874	1.57407e-65	7.25377e-65	AP001442.1	0.0792879	1.95758	0.936804	0.99998
MTMR8	9.21014	1.37783	3.2569e-20	1.28057e-19	F5	-0.148278	-2.14601	0.882123	0.999049	AC008667.1	-0.0849116	-1.57736	0.932332	0.999148	SPACA9	5.54043	0.532507	3.01738e-08	1.34106e-07	H2BC12	17.0899	2.20162	1.76552e-65	8.12355e-65	THBD	0.0792484	1.94932	0.936835	0.99998
ATP9B	9.20507	1.06338	3.41459e-20	1.34081e-19	AC090907.1	-0.148281	-2.26903	0.882121	0.999049	ZNF469	-0.0849116	-1.43936	0.932332	0.999148	CHI3L1	5.52099	0.980469	3.37088e-08	1.49595e-07	CATSPERD	16.9792	5.70704	1.17119e-64	5.37241e-64	VWF	0.0792385	1.66696	0.936843	0.99998
C12orf75	9.11778	0.555723	7.66761e-20	2.99907e-19	NELL2	-0.148283	-2.3716	0.882119	0.999049	AC015923.1	-0.0849268	-1.80842	0.93232	0.999148	STC1	5.51508	0.536966	3.48626e-08	1.54487e-07	SORBS2	16.9206	2.06677	3.17152e-64	1.45261e-63	WNK4	0.0792188	1.3861	0.936859	0.99998
FYB2	9.05322	1.21598	1.38818e-19	5.40851e-19	KCNJ16	-0.148289	-2.52361	0.882115	0.999049	AP000229.1	-0.086543	-0.577937	0.931035	0.999148	DPCD	5.51109	0.65119	3.56617e-08	1.57795e-07	TBC1D32	16.8244	3.05423	1.61642e-63	7.36972e-63	AC099489.1	0.0783559	0.673364	0.937545	0.99998
VPS13B	9.03544	0.846026	1.63336e-19	6.33903e-19	AC073167.1	-0.148786	-1.41765	0.881722	0.999049	CLEC6A	-0.0865461	-0.553628	0.931032	0.999148	RABGAP1L	5.50066	0.475569	3.78378e-08	1.67178e-07	GDF15	16.7935	2.13956	2.72452e-63	1.2403e-62	AC005998.1	0.0779269	2.98492	0.937886	0.99998
IL17C	8.91735	1.33011	4.77568e-19	1.85104e-18	PKD1L1	-0.148789	-1.42475	0.88172	0.999049	AC116552.1	-0.0865491	-0.8653	0.93103	0.999148	SPEF2	5.48832	0.391066	4.05768e-08	1.79015e-07	FARS2	16.7715	2.35788	3.94366e-63	1.79257e-62	AC008079.1	0.0779071	2.5694	0.937902	0.99998
SUPT3H	8.90654	1.30232	5.26512e-19	2.03548e-18	WFDC12	-0.148792	-1.44526	0.881718	0.999049	SLC47A2	-0.0866528	0.495372	0.930947	0.999148	CCL28	5.48272	0.895887	4.18835e-08	1.84509e-07	CYGB	16.7368	4.75644	7.06465e-63	3.20635e-62	AL157938.3	0.0778973	2.37842	0.93791	0.99998
FAM107A	8.88648	1.95956	6.30771e-19	2.43541e-18	TEX52	-0.148794	-1.33296	0.881716	0.999049	LINC01353	-0.0873969	0.28936	0.930356	0.999148	PVT1	5.46702	0.897881	4.5767e-08	2.00732e-07	EZR	16.7162	2.16275	9.99098e-63	4.52764e-62	AC010834.2	0.0778973	2.29531	0.93791	0.99998
RGCC	8.87786	0.60833	6.81578e-19	2.62482e-18	AC018653.1	-0.148802	-1.49287	0.88171	0.999049	ADH6	-0.0874213	0.234516	0.930337	0.999148	ANAPC4	5.4213	0.479137	5.91664e-08	2.57993e-07	ATXN1	16.6703	2.15089	2.15526e-62	9.75232e-62	AC018797.3	0.0778874	2.5853	0.937918	0.99998
ATXN7L1	8.82107	1.24987	1.13373e-18	4.36048e-18	AL138995.1	-0.149287	-0.7564	0.881327	0.999049	AC021851.2	-0.0882111	-0.601754	0.929709	0.999148	TNFSF15	5.40564	1.17294	6.45776e-08	2.8118e-07	MID1	16.6446	2.24627	3.31045e-62	1.49569e-61	AC007533.2	0.0778874	2.26026	0.937918	0.99998
SHANK2	8.79959	0.596743	1.37321e-18	5.2748e-18	AC091946.1	-0.149287	-0.91518	0.881327	0.999049	AC004494.1	-0.0882172	-0.599461	0.929704	0.999148	MGAT5	5.39658	0.457173	6.79238e-08	2.95321e-07	LRMDA	16.6233	2.74901	4.72248e-62	2.13044e-61	WFDC1	0.0778282	1.78011	0.937965	0.99998
HSP90AB1	8.7623	2.22677	1.91313e-18	7.31493e-18	AC104653.1	-0.149289	-0.93262	0.881325	0.999049	THBD	-0.0887996	-21.9256	0.929241	0.999148	TRAPPC9	5.37522	0.556377	7.64875e-08	3.32073e-07	GDA	16.5761	2.41911	1.03829e-61	4.67697e-61	AP003392.1	0.0777888	1.45703	0.937996	0.99998
PRSS1	8.76224	1.52541	1.91407e-18	7.31493e-18	MAPK10-AS1	-0.149292	-0.936854	0.881323	0.999049	Z98742.4	-0.0887996	-21.8037	0.929241	0.999148	ANKMY1	5.37352	0.446397	7.72124e-08	3.34736e-07	IFI27	16.5504	0.977997	1.59077e-61	7.15488e-61	AL031727.2	0.0764278	2.0055	0.939079	0.99998
S100A1	8.67802	1.56662	4.02717e-18	1.53319e-17	LINC02652	-0.149295	-1.02271	0.881321	0.999049	AL929236.1	-0.0887996	-21.7326	0.929241	0.999148	H2BC8	5.37259	1.69451	7.76121e-08	3.35983e-07	H2AC8	16.545	3.30645	1.73826e-61	7.80655e-61	SMIM18	0.0763785	1.59454	0.939118	0.99998
PI3	8.63892	0.734562	5.67455e-18	2.15762e-17	AP005264.1	-0.149297	-1.14348	0.881319	0.999049	FABP3	-0.0887996	-21.9257	0.929241	0.999148	PDE4D	5.35579	0.647838	8.51831e-08	3.68227e-07	SAA2-SAA4	16.4451	3.07276	9.08825e-61	4.07545e-60	AC004540.2	0.0763686	1.50702	0.939126	0.99998
SMC4	8.60147	0.512605	7.87003e-18	2.98107e-17	SCAT2	-0.14979	-0.644343	0.88093	0.999049	VWF	-0.0887996	-21.6913	0.929241	0.999148	PGR	5.3446	0.4928	9.0617e-08	3.91152e-07	SPNS2	16.2318	3.18626	3.00602e-59	1.34598e-58	ADAMTSL4-AS2	0.0754958	0.580809	0.93982	0.99998
ARHGAP18	8.5061	0.371832	1.79879e-17	6.79643e-17	AL158198.1	-0.150264	-0.335823	0.880557	0.999049	WNK4	-0.0887996	-21.8333	0.929241	0.999148	AL049828.1	5.26856	0.416577	1.37495e-07	5.89265e-07	JMJD1C	16.0973	1.81567	2.66645e-58	1.19038e-57	C16orf89	0.0750471	2.46589	0.940177	0.99998
DNALI1	8.48007	0.407396	2.25065e-17	8.49303e-17	SLC22A1	-0.150269	-0.417228	0.880552	0.999049	MAF	-0.0887996	-21.8825	0.929241	0.999148	CLIC5	5.24742	0.703259	1.54248e-07	6.58242e-07	MGLL	15.9385	2.2799	3.42631e-57	1.5228e-56	CR381653.1	0.0749583	1.52961	0.940248	0.99998
TFF3	8.47403	0.421058	2.37044e-17	8.93383e-17	AC017002.3	-0.153066	0.0359003	0.878346	0.999049	LINC02779	-0.0887996	-21.7689	0.929241	0.999148	SIPA1L3	5.23125	0.755116	1.68367e-07	7.17472e-07	CAMKMT	15.893	2.55672	7.08771e-57	3.14079e-56	AL359844.1	0.074909	1.44351	0.940287	0.99998
TMEM108	8.46319	1.75474	2.60169e-17	9.76856e-17	ATP12A	-0.154798	-22.4972	0.876981	0.999049	ADTRP	-0.0887996	-21.7284	0.929241	0.999148	NME7	5.22643	0.393565	1.72818e-07	7.34355e-07	GLRX	15.89	1.96472	7.43119e-57	3.28814e-56	TGIF2-RAB5IF	0.0748991	1.37066	0.940295	0.99998
CCNO	8.39133	0.367999	4.80666e-17	1.80025e-16	ADAMTS3	-0.154798	-22.3469	0.876981	0.999049	PRKX-AS1	-0.0887996	-21.8302	0.929241	0.999148	SLC39A11	5.16161	0.726044	2.4483e-07	1.03741e-06	DTNA	15.8054	5.5224	2.85441e-56	1.26116e-55	C2CD4A	0.0748843	0.51622	0.940307	0.99998
CKB	8.38304	0.496334	5.15777e-17	1.92934e-16	MYH15	-0.154798	-22.3595	0.876981	0.999049	TF	-0.0887996	-21.8161	0.929241	0.999148	RPTOR	5.15233	0.879881	2.57272e-07	1.0886e-06	BTBD9	15.7952	2.99686	3.3564e-56	1.48076e-55	AC097716.1	0.0735776	1.84764	0.941347	0.99998
SFRP1	8.38009	2.22631	5.28875e-17	1.97587e-16	AL672310.1	-0.155313	-2.26095	0.876575	0.999049	LINC02698	-0.0887996	-21.9262	0.929241	0.999148	CIB1	5.13826	1.64945	2.77293e-07	1.17166e-06	SNED1	15.7356	2.75222	8.61863e-56	3.79676e-55	AC092111.1	0.0734691	1.28269	0.941433	0.99998
EVA1C	8.36843	0.596055	5.83884e-17	2.17867e-16	NR5A2	-0.155316	-2.2139	0.876573	0.999049	TBX15	-0.0887996	-21.9613	0.929241	0.999148	C4orf19	5.10449	0.625572	3.31683e-07	1.3995e-06	CCDC146	15.6502	2.72498	3.30991e-55	1.45597e-54	AC104695.2	0.0732916	0.416804	0.941574	0.99998
KLF12	8.33404	1.24561	7.81281e-17	2.91161e-16	LINC02666	-0.155536	0.257805	0.876398	0.999049	AC016866.2	-0.0887996	-21.9681	0.929241	0.999148	CALM1	5.0809	1.67558	3.75649e-07	1.57836e-06	MAP3K5	15.6178	1.86317	5.50525e-55	2.41812e-54	AC112722.1	0.0728971	0.012165	0.941888	0.99998
ALPG	8.31447	2.34615	9.21663e-17	3.42626e-16	NOX5	-0.15582	-1.6663	0.876175	0.999049	AC060765.2	-0.0887996	-21.9276	0.929241	0.999148	PDZK1IP1	5.07762	0.461198	3.82193e-07	1.60361e-06	AC090001.1	15.6111	5.61174	6.11672e-55	2.68277e-54	GRAMD1B	0.072261	0.44919	0.942394	0.99998
PTX3	8.31361	1.21965	9.28347e-17	3.44683e-16	IFITM10	-0.155828	-1.45672	0.876169	0.999049	CBY2	-0.0897693	-0.0299569	0.928471	0.999148	KIAA1328	5.06904	1.20364	3.99832e-07	1.67528e-06	MACF1	15.5801	1.82045	9.93891e-55	4.35281e-54	ACRV1	0.0721969	2.49686	0.942445	0.99998
GPRC5A	8.30422	1.52846	1.00481e-16	3.7215e-16	AL365273.2	-0.155831	-1.59012	0.876167	0.999049	IL11	-0.0897724	-0.0971887	0.928468	0.999148	PCCA	5.06686	0.4382	4.04422e-07	1.69214e-06	FAAH2	15.5637	2.21134	1.28548e-54	5.62164e-54	AC015923.1	0.0721574	2.15374	0.942477	0.99998
TASP1	8.1869	0.718557	2.68031e-16	9.89045e-16	AC010978.1	-0.155833	-1.68029	0.876164	0.999049	LINC00862	-0.0897907	-0.114472	0.928454	0.999148	SPP1	5.056	0.740038	4.28143e-07	1.7889e-06	CSTA	15.5553	3.66241	1.46561e-54	6.40006e-54	LINC02159	0.0721574	1.92703	0.942477	0.99998
CXCR4	8.14503	1.94135	3.79203e-16	1.39584e-15	IGFL2-AS1	-0.156319	-0.976948	0.875782	0.999049	AC073316.1	-0.0897968	-0.269409	0.928449	0.999148	CDC14A	5.04299	0.824974	4.58313e-07	1.91229e-06	SMYD3	15.442	1.94575	8.54281e-54	3.72506e-53	AC073254.1	0.0720687	1.46159	0.942547	0.99998
DKK1	8.11066	2.33553	5.03463e-16	1.85097e-15	AC007743.1	-0.156319	-0.868714	0.875782	0.999049	STARD13-AS	-0.0898486	-0.321207	0.928408	0.999148	IFT27	5.02652	0.349878	4.99459e-07	2.08108e-06	PARD3	15.417	1.71418	1.25726e-53	5.47429e-53	CCDC194	0.0720588	1.50578	0.942555	0.99998
GDA	7.9811	0.638656	1.45031e-15	5.28667e-15	PNPLA5	-0.156327	-1.08894	0.875775	0.999049	AC009509.2	-0.0904509	-1.45635	0.927929	0.999148	LINC01004	5.0119	1.1334	5.38961e-07	2.23945e-06	MYLK3	15.4104	4.67638	1.39387e-53	6.06031e-53	AL034351.4	0.0720292	1.20091	0.942579	0.99998
DMGDH	7.97312	0.668508	1.54712e-15	5.63273e-15	AC125618.2	-0.156327	-1.0792	0.875775	0.999049	SPRR1B	-0.0904509	-1.50813	0.927929	0.999148	BANK1	4.99268	0.75052	5.95477e-07	2.46745e-06	H2AZ2	15.3966	2.07033	1.72475e-53	7.48804e-53	LINC00571	0.0712008	0.160509	0.943238	0.99998
AC012593.1	7.96782	1.46868	1.61499e-15	5.87269e-15	GPNMB	-0.156815	-0.779934	0.87539	0.999049	AC005050.3	-0.0904509	-1.28352	0.927929	0.999148	MTMR8	4.96337	0.917704	6.928e-07	2.86281e-06	PCYT1B	15.3425	5.69691	3.97881e-53	1.72492e-52	TBC1D24	0.070757	1.95084	0.943591	0.99998
SOX6	7.94167	1.1814	1.99472e-15	7.22212e-15	AC068051.1	-0.157322	-0.476324	0.874991	0.999049	TLCD4-RWDD3	-0.0904539	-1.29444	0.927926	0.999148	ZSCAN31	4.94631	0.935297	7.5635e-07	3.12111e-06	CKS2	15.3123	1.86895	6.32765e-53	2.73924e-52	ALG13-AS1	0.0706633	-0.0375523	0.943666	0.99998
MORN2	7.93132	0.507676	2.16822e-15	7.82752e-15	SHOC1	-0.157787	-0.361937	0.874625	0.999049	AL022328.1	-0.0904539	-1.33426	0.927926	0.999148	RPL18	4.92629	1.29456	8.38052e-07	3.44405e-06	NUPR1	15.285	2.97125	9.6269e-53	4.16148e-52	AC004900.1	0.070609	1.43141	0.943709	0.99998
HBEGF	7.91009	0.85842	2.57207e-15	9.2743e-15	MASP2	-0.158243	-0.263316	0.874265	0.999049	C9orf153	-0.090457	-1.49025	0.927924	0.999148	CASC2	4.91373	0.646921	8.93617e-07	3.66737e-06	QPCT	15.2756	2.53478	1.11145e-52	4.79764e-52	AC004554.2	0.0705795	1.22849	0.943732	0.99998
CCSER1	7.85481	1.08098	4.00392e-15	1.43853e-14	AC231533.1	-0.158246	-0.186571	0.874263	0.999049	AL078590.2	-0.09046	-1.64745	0.927922	0.999148	RPL27A	4.91285	1.27336	8.97618e-07	3.67876e-06	COL17A1	15.1645	4.01809	6.07614e-52	2.61527e-51	AC131953.2	0.0702934	0.179888	0.94396	0.99998
CA2	7.83106	1.25577	4.83777e-15	1.73604e-14	SRPX2	-0.161834	-22.4163	0.871437	0.999049	STRA8	-0.09046	-1.45833	0.927922	0.999148	SPA17	4.88723	0.371276	1.02264e-06	4.18544e-06	DIS3L2	15.1592	2.17193	6.58956e-52	2.82814e-51	MEGF11	0.0691987	1.37061	0.944831	0.99998
ADAMTS1	7.8095	2.58714	5.74134e-15	2.05783e-14	HTR3A	-0.161834	-22.6586	0.871437	0.999049	AC016576.1	-0.09046	-1.61195	0.927922	0.999148	RPS13	4.84695	1.3134	1.25376e-06	5.11045e-06	AL049828.1	15.1488	1.71363	7.71328e-52	3.30569e-51	CPNE4	0.0691494	1.02164	0.944871	0.99998
CDK14	7.79789	0.653302	6.29507e-15	2.25092e-14	CLEC6A	-0.162348	-2.25032	0.871032	0.999049	SHISA9	-0.0904631	-1.50818	0.927919	0.999148	TMEM108	4.83305	1.14419	1.34454e-06	5.47304e-06	FER	15.097	2.0218	1.6951e-51	7.25434e-51	AL109984.1	0.0691494	1.12863	0.944871	0.99998
HDAC9	7.75193	0.75481	9.05048e-15	3.23231e-14	AP000229.1	-0.16235	-2.28659	0.87103	0.999049	AC090921.1	-0.090553	0.27081	0.927848	0.999148	PTPRG	4.82033	0.540824	1.43322e-06	5.8182e-06	AGAP1	15.0823	1.73693	2.11648e-51	9.04477e-51	LACTB2-AS1	0.0680547	0.428034	0.945742	0.99998
DNAL1	7.72021	0.364632	1.16136e-14	4.14278e-14	AL355076.2	-0.162854	-1.39601	0.870634	0.999049	SYT3	-0.0920869	-0.500214	0.926629	0.999148	L3MBTL4	4.8194	1.11012	1.4399e-06	5.83745e-06	SAA1	15.0609	2.03821	2.92926e-51	1.25004e-50	AC104024.3	0.0678476	1.64037	0.945907	0.99998
UBXN10	7.64431	0.327871	2.10067e-14	7.48458e-14	UNC13C	-0.162854	-1.29172	0.870634	0.999049	PKIA-AS1	-0.0920991	-0.767854	0.926619	0.999148	TENM4	4.7597	0.617891	1.93881e-06	7.82831e-06	MAGI1	15.0598	2.36939	2.97582e-51	1.2681e-50	AC004053.1	0.0678081	1.40583	0.945938	0.99998
PDZRN3	7.61103	2.04236	2.71929e-14	9.66574e-14	PAK5	-0.162854	-1.35582	0.870634	0.999049	AC068491.2	-0.0921052	-0.856221	0.926614	0.999148	SRI	4.75714	1.15983	1.96353e-06	7.90683e-06	ZSCAN5A	15.0059	3.09909	6.72e-51	2.85957e-50	AC005410.2	0.0669156	0.843281	0.946649	0.99998
DENND1A	7.60328	0.692858	2.88709e-14	1.02379e-13	AC144831.1	-0.162856	-1.58622	0.870632	0.999049	AL442003.1	-0.0921052	-0.801284	0.926614	0.999148	JAZF1	4.75024	0.536819	2.03175e-06	8.16776e-06	AL353660.1	14.9073	5.42136	2.95318e-50	1.25489e-49	AL136531.2	0.0664915	0.29329	0.946986	0.99998
NPAS3	7.49371	1.18518	6.69553e-14	2.36591e-13	AL691447.2	-0.163351	-0.95856	0.870242	0.999049	CPEB2-DT	-0.0921083	-0.938996	0.926612	0.999148	MIR31HG	4.73856	0.536507	2.15244e-06	8.62124e-06	CST6	14.8899	5.10624	3.83065e-50	1.62545e-49	AC005753.3	0.0664373	1.58366	0.94703	0.99998
MIRLET7BHG	7.48049	1.24575	7.4048e-14	2.61039e-13	COL4A6	-0.163354	-0.938194	0.87024	0.999049	VCAN	-0.0937107	-0.261982	0.925339	0.999148	CCL2	4.72346	0.703423	2.31866e-06	9.27464e-06	REV3L	14.8802	1.72799	4.43166e-50	1.87782e-49	RIPOR3	0.0664373	1.64057	0.94703	0.99998
CRISP3	7.47149	1.56927	7.92945e-14	2.79206e-13	AC027250.2	-0.163354	-1.12328	0.87024	0.999049	AC005998.1	-0.0943496	-21.86	0.924831	0.999148	SLC34A2	4.68027	1.19753	2.86503e-06	1.14296e-05	JAZF1	14.874	2.12668	4.86079e-50	2.05385e-49	KCNJ16	0.0663485	1.22966	0.9471	0.99998
TPK1	7.45051	0.990567	9.2977e-14	3.27e-13	SLC5A10	-0.163367	-1.1732	0.870229	0.999049	AL161757.5	-0.0943496	-21.851	0.924831	0.999148	PHLPP1	4.6708	1.38607	3.00033e-06	1.19535e-05	DIAPH2	14.8322	1.99232	9.07634e-50	3.82968e-49	KIAA1614	0.0662894	1.19882	0.947147	0.99998
TNFSF15	7.41318	1.26005	1.23308e-13	4.32659e-13	SAMD12-AS1	-0.16337	-1.28519	0.870227	0.999049	PKP1	-0.0943496	-21.9033	0.924831	0.999148	RGS2	4.6589	1.8365	3.179e-06	1.26318e-05	LDLRAD4	14.7981	2.83205	1.50775e-49	6.34399e-49	LINC02028	0.0662795	1.12965	0.947155	0.99998
DNAH14	7.4052	0.721855	1.30957e-13	4.58425e-13	LINC01950	-0.163841	-0.730363	0.869856	0.999049	AC019186.1	-0.0943496	-21.8795	0.924831	0.999148	COBL	4.65566	0.388461	3.22938e-06	1.2815e-05	CRPPA	14.7957	3.25758	1.56063e-49	6.55725e-49	CDK5R1	0.066171	0.148364	0.947242	0.99998
ERBB4	7.40324	0.675928	1.32904e-13	4.64699e-13	SPDYE2B	-0.163868	-0.854361	0.869835	0.999049	CCL7	-0.0943496	-22.0093	0.924831	0.999148	HHEX	4.63819	0.78948	3.51475e-06	1.38923e-05	PLXDC2	14.7954	2.05875	1.56911e-49	6.58367e-49	PCED1B	0.0652883	0.155877	0.947944	0.99998
STXBP5	7.36634	1.16377	1.75372e-13	6.11764e-13	CA1	-0.164336	-0.572453	0.869467	0.999049	ABCB1	-0.0943496	-21.9032	0.924831	0.999148	MBD5	4.60281	0.461789	4.16835e-06	1.64324e-05	TRERF1	14.7874	3.57308	1.76529e-49	7.39647e-49	SEMA6A-AS1	0.0650368	0.133504	0.948145	0.99998
TNIP3	7.3301	1.99588	2.29982e-13	7.99475e-13	AC007619.1	-0.164802	-0.314661	0.8691	0.999049	PLCD4	-0.0943496	-21.9266	0.924831	0.999148	SLC14A1	4.59822	0.653517	4.26124e-06	1.67765e-05	BRAF	14.776	1.83375	2.09184e-49	8.75245e-49	ANO3	0.0649875	1.5345	0.948184	0.99998
TMEM117	7.30618	1.1289	2.74836e-13	9.5429e-13	AL109811.1	-0.16534	-0.355688	0.868677	0.999049	CD52	-0.0943496	-21.996	0.924831	0.999148	ANKRD36	4.55773	0.966714	5.17104e-06	2.02257e-05	SIK3	14.7602	2.02033	2.64683e-49	1.10592e-48	PTPRD	0.0648495	1.01199	0.948294	0.99998
RPTOR	7.29438	0.954566	3.00037e-13	1.04059e-12	AL049828.2	-0.167525	0.134328	0.866957	0.999049	AC009950.1	-0.0943496	-21.8803	0.924831	0.999148	KLHL22	4.55486	1.25902	5.24198e-06	2.04765e-05	H2BC8	14.6959	3.80103	6.84879e-49	2.85763e-48	AP000229.1	0.0636068	1.95079	0.949283	0.99998
CFAP69	7.28547	0.355088	3.2056e-13	1.11049e-12	ATP8A2	-0.16887	-22.5391	0.865899	0.999049	AC007533.2	-0.0943496	-22.0015	0.924831	0.999148	SDK1	4.5495	0.623083	5.37727e-06	2.09504e-05	SLC1A3	14.5853	1.70182	3.48167e-48	1.4507e-47	HHLA2	0.0635871	-0.162807	0.949299	0.99998
EXOC6B	7.24222	0.710675	4.41409e-13	1.52385e-12	MEI1	-0.16887	-22.4875	0.865899	0.999049	AC010834.2	-0.0943496	-21.953	0.924831	0.999148	PRKCA	4.52969	1.33684	5.907e-06	2.29547e-05	PF4V1	14.5483	4.41677	5.98329e-48	2.48958e-47	AL390774.2	0.0634589	1.06472	0.949401	0.99998
S100P	7.22063	0.812715	5.1746e-13	1.7823e-12	CPXCR1	-0.169383	-2.39837	0.865496	0.999049	AL451049.1	-0.0943496	-21.9495	0.924831	0.999148	LCA5L	4.51679	0.442603	6.27827e-06	2.43659e-05	KCNE1	14.5049	4.65275	1.12816e-47	4.68765e-47	AC006111.1	0.0634589	1.17213	0.949401	0.99998
EDA	7.18536	1.85435	6.70312e-13	2.30612e-12	TAGLN3	-0.169383	-2.45241	0.865496	0.999049	HIGD1B	-0.0943496	-22.0384	0.924831	0.999148	IFIT3	4.51181	0.574181	6.42757e-06	2.49131e-05	GJB7	14.4664	5.28251	1.97665e-47	8.20189e-47	CASS4	0.0633898	0.641298	0.949456	0.99998
KRT16	7.17154	0.97239	7.41595e-13	2.54552e-12	SYT3	-0.169388	-2.60337	0.865491	0.999049	AL157938.3	-0.0943496	-22.0301	0.924831	0.999148	QPCT	4.50038	0.634398	6.7832e-06	2.62576e-05	KIAA1217	14.4421	1.61743	2.81318e-47	1.16568e-46	AC015853.3	0.06338	0.723257	0.949464	0.99998
COBL	7.1323	0.369003	9.87031e-13	3.37639e-12	AP003472.1	-0.169396	-2.59841	0.865485	0.999049	AC018797.3	-0.0943496	-22.11	0.924831	0.999148	PDE7B	4.49059	0.641132	7.10256e-06	2.74584e-05	DLGAP1	14.4405	3.01898	2.8756e-47	1.1899e-46	MUC20	0.06338	0.689428	0.949464	0.99998
WDR44	7.03424	0.872626	2.00349e-12	6.83006e-12	AL590101.1	-0.1699	-1.7241	0.865088	0.999049	CCDC184	-0.0948802	0.670481	0.92441	0.999148	TIAM2	4.47064	0.860144	7.79875e-06	3.00723e-05	RIN2	14.4042	1.96526	4.86797e-47	2.00879e-46	ANKRD18B	0.0632863	0.139562	0.949539	0.99998
PDE4D	7.02665	0.574269	2.11556e-12	7.18763e-12	COL8A2	-0.170384	-0.91961	0.864709	0.999049	SAMD3	-0.0953803	-0.324406	0.924013	0.999148	TCIM	4.46914	0.384618	7.85337e-06	3.0244e-05	CDK1	14.3189	1.92387	1.66647e-46	6.86733e-46	PGM5	0.062522	0.585171	0.950147	0.99998
SOX5	7.00907	1.08793	2.3991e-12	8.13253e-12	AC139530.3	-0.170384	-1.10367	0.864709	0.999049	AL031768.2	-0.0960024	-1.3385	0.923519	0.999148	TNFAIP3	4.44976	0.594572	8.59661e-06	3.30215e-05	MUC16	14.2648	1.87949	3.62384e-46	1.49129e-45	CPEB2-DT	0.0621669	1.96705	0.95043	0.99998
RFX3-AS1	7.00433	0.630754	2.48176e-12	8.40323e-12	AP003068.1	-0.170384	-0.943481	0.864709	0.999049	AL021918.4	-0.0960039	-1.44127	0.923517	0.999148	MGST3	4.44879	1.41301	8.63544e-06	3.31283e-05	CDKN2A	14.2246	2.31592	6.44779e-46	2.64254e-45	SYT3	0.0621571	1.47752	0.950438	0.99998
TBC1D19	6.98101	0.76864	2.9307e-12	9.91216e-12	AC132153.1	-0.170384	-1.15399	0.864709	0.999049	AL109984.1	-0.0960054	-1.45399	0.923516	0.999148	AQP5	4.43762	0.718545	9.09593e-06	3.48503e-05	AC087500.1	14.1875	3.31502	1.09508e-45	4.4819e-45	AC027018.1	0.060727	1.78071	0.951577	0.99998
CAMKMT	6.97306	0.638379	3.10125e-12	1.04772e-11	FGF12-AS3	-0.170386	-1.05225	0.864706	0.999049	AL136038.5	-0.0960054	-1.66762	0.923516	0.999148	WDR44	4.42793	0.673009	9.51412e-06	3.64061e-05	RPS27L	14.1552	2.22173	1.73414e-45	7.08775e-45	MAP3K5-AS1	0.0606087	1.0461	0.951671	0.99998
DNAJB13	6.95824	0.334852	3.44557e-12	1.16273e-11	AC073878.1	-0.170463	-1.55193	0.864646	0.999049	AL137129.1	-0.0960054	-1.49351	0.923516	0.999148	PRKCH	4.41668	0.882908	1.00228e-05	3.82549e-05	COP1	14.1377	1.74452	2.22423e-45	9.07847e-45	CC2D2B	0.0606087	1.1243	0.951671	0.99998
EZR	6.9569	2.11434	3.47832e-12	1.17247e-11	SPDYE21P	-0.170833	0.253993	0.864355	0.999049	SEC16B	-0.0960054	-1.44967	0.923516	0.999148	DNALI1	4.41336	0.386979	1.01777e-05	3.87969e-05	METTL15	14.0939	1.65682	4.14051e-45	1.68771e-44	NOS1	0.0598296	0.0254011	0.952291	0.99998
HIF3A	6.95322	2.939	3.57049e-12	1.20219e-11	AC007563.2	-0.171836	-0.468673	0.863567	0.999049	AL445928.2	-0.0960085	-1.58588	0.923514	0.999148	TEX22	4.36421	1.21287	1.27584e-05	4.85726e-05	ARID1B	14.065	1.77497	6.2297e-45	2.53583e-44	AL157886.1	0.0593167	2.04376	0.9527	0.99998
PARD3B	6.94952	0.50072	3.66531e-12	1.23273e-11	LINC02241	-0.172289	-0.193949	0.86321	0.999049	AC010326.3	-0.0960115	-1.76506	0.923511	0.999148	STXBP5	4.36231	0.834408	1.28693e-05	4.89328e-05	ASB14	14.0136	4.88335	1.28669e-44	5.23046e-44	AL357153.2	0.0590998	0.894165	0.952873	0.99998
ENTPD1-AS1	6.93914	0.980096	3.94489e-12	1.32527e-11	AC105233.5	-0.174078	0.0806956	0.861804	0.999049	CPNE4	-0.0960115	-1.63943	0.923511	0.999148	MT1G	4.31169	0.79958	1.62013e-05	6.11371e-05	ANLN	13.9668	2.11374	2.48395e-44	1.00837e-43	AC023389.2	0.0590702	0.450257	0.952896	0.99998
WDPCP	6.92565	0.390848	4.33967e-12	1.45627e-11	KIAA1614	-0.175907	-22.4926	0.860367	0.999049	SYT1	-0.0960176	-1.71738	0.923507	0.999148	STX2	4.28284	0.432813	1.84524e-05	6.95444e-05	MX1	13.941	1.73016	3.57022e-44	1.44739e-43	SPDYE1	0.0583256	0.808627	0.953489	0.99998
PCED1B	6.90628	1.10508	4.97522e-12	1.66767e-11	AC002064.3	-0.176418	-2.42763	0.859966	0.999049	LINC02288	-0.0969279	0.0325604	0.922784	0.999148	TBC1D19	4.26424	0.597523	2.00583e-05	7.53128e-05	CA12	13.7713	1.98894	3.79311e-43	1.53567e-42	GNA14	0.0578867	1.87845	0.953839	0.99998
ICAM1	6.90154	1.29658	5.14409e-12	1.72235e-11	AL391244.1	-0.176418	-2.46499	0.859966	0.999049	EDDM13	-0.0969828	-0.208938	0.92274	0.999148	TCF7	4.23371	0.478541	2.29866e-05	8.59848e-05	GIPR	13.7514	4.25184	4.99622e-43	2.02003e-42	AC023424.3	0.0577979	1.48941	0.95391	0.99998
ESRRG	6.84136	0.722173	7.84449e-12	2.61774e-11	TCF24	-0.17642	-2.38625	0.859964	0.999049	TCF24	-0.0976369	-0.649337	0.922221	0.999148	MIRLET7BHG	4.22781	0.858035	2.35982e-05	8.80529e-05	OXR1	13.7362	1.55185	6.16339e-43	2.48858e-42	AC027319.1	0.0564468	1.56574	0.954986	0.99998
GPR39	6.74685	0.818304	1.51085e-11	5.01388e-11	AC004917.1	-0.176921	-1.53101	0.859571	0.999049	AC002064.3	-0.0976399	-0.687485	0.922218	0.999148	TMEM117	4.22241	0.813468	2.417e-05	8.99626e-05	CCL28	13.7324	2.4715	6.49105e-43	2.61736e-42	ESM1	0.0562496	0.736672	0.955143	0.99998
ZHX2	6.74144	1.44281	1.56829e-11	5.19874e-11	AC104109.4	-0.177418	-1.05233	0.85918	0.999049	AL133352.1	-0.097643	-0.777455	0.922216	0.999148	PKHD1L1	4.20399	0.507005	2.62255e-05	9.73719e-05	FMN1	13.7004	1.63328	1.00987e-42	4.06657e-42	GPC5	0.0561904	0.442688	0.95519	0.99998
MB21D2	6.73675	0.836033	1.61967e-11	5.36313e-11	AC090186.1	-0.177424	-1.10608	0.859176	0.999049	PKD1L1	-0.097643	-0.854521	0.922216	0.999148	DNAL1	4.20092	0.303586	2.6583e-05	9.85774e-05	PROS1	13.6825	4.36163	1.29163e-42	5.19422e-42	AC091946.1	0.0549872	1.28357	0.956149	0.99998
ANGPTL4	6.64454	2.29357	3.04171e-11	1.00276e-10	TEX46	-0.177448	-1.40421	0.859157	0.999049	WFDC12	-0.0976521	-0.83399	0.922209	0.999148	TTC26	4.19717	0.292918	2.70272e-05	0.000100101	APOL1	13.6754	1.59992	1.42513e-42	5.72342e-42	AC004917.1	0.0549773	1.31238	0.956157	0.99998
TDO2	6.62135	1.80504	3.55942e-11	1.17114e-10	AL132671.2	-0.177914	-0.884831	0.858791	0.999049	AC126182.3	-0.0976521	-0.891212	0.922209	0.999148	H4C8	4.17563	1.03073	2.97168e-05	0.000109656	VIM	13.6352	2.06911	2.47375e-42	9.92147e-42	LINC02652	0.0548787	0.967842	0.956235	0.99998
GAB2	6.57255	0.989818	4.94601e-11	1.62342e-10	AL356124.1	-0.178375	0.382072	0.858428	0.999049	AP001021.3	-0.0976521	-0.851128	0.922209	0.999148	NOS1AP	4.12971	1.2123	3.63228e-05	0.00013354	KRT23	13.6236	1.81776	2.89958e-42	1.15983e-41	TNXB	0.0548491	0.862835	0.956259	0.99998
PVT1	6.56951	0.791133	5.04805e-11	1.6551e-10	AC002553.2	-0.178382	-0.496364	0.858423	0.999049	NLRP10	-0.0976582	-1.00141	0.922204	0.999148	C15orf65	4.12101	0.419347	3.77216e-05	0.000138343	ZFAND3	13.5952	1.51282	4.2738e-42	1.70724e-41	AC021851.2	0.0548392	0.708963	0.956267	0.99998
TCIM	6.48334	0.341707	8.97161e-11	2.92553e-10	AC004594.1	-0.178387	-0.506262	0.858419	0.999049	MAP3K5-AS1	-0.0976643	-0.940935	0.922199	0.999148	EFCAB2	4.11204	0.224868	3.92177e-05	0.000143479	PRICKLE2	13.5931	3.64465	4.40268e-42	1.75639e-41	CCN5	0.0547505	0.652851	0.956337	0.99998
DIRAS3	6.44576	1.99616	1.15025e-10	3.74267e-10	AL137186.2	-0.17839	-0.581261	0.858417	0.999049	COL4A6	-0.0992775	-0.347207	0.920918	0.999148	KRT5	4.10288	0.300868	4.08037e-05	0.0001491	DMGDH	13.4996	1.97816	1.57133e-41	6.26028e-41	AL357075.4	0.0547406	0.48329	0.956345	0.99998
PTGES3	6.38493	2.08896	1.71476e-10	5.5674e-10	APCDD1L-DT	-0.178398	-0.688199	0.85841	0.999049	LINC01708	-0.0992866	0.178906	0.920911	0.999148	CXCL6	4.04492	0.926057	5.23414e-05	0.000190102	ARMH4	13.311	3.27594	1.9986e-40	7.94145e-40	AC053513.1	0.0520186	0.0744159	0.958514	0.99998
SIPA1L3	6.32889	0.625148	2.46938e-10	7.98291e-10	LRMP	-0.178419	-0.610467	0.858394	0.999049	AL359922.1	-0.0992958	-0.748555	0.920903	0.999148	BICC1	4.04065	0.580114	5.33022e-05	0.000193357	LAMB4	13.2626	5.1531	3.81596e-40	1.51427e-39	SLC5A10	0.0519693	0.71576	0.958553	0.99998
EFNA5	6.32624	0.762601	2.51214e-10	8.11239e-10	AC012409.2	-0.179809	-0.323152	0.857303	0.999049	CHI3L2	-0.0998996	-22.0266	0.920424	0.999148	TPD52	4.03391	1.16601	5.48566e-05	0.000198756	CCNB1	13.1687	1.72571	1.32845e-39	5.25772e-39	SAMD12-AS1	0.0519496	0.811144	0.958569	0.99998
SERPINB3	6.31058	2.08467	2.77996e-10	8.95799e-10	AL008633.1	-0.18028	-0.260694	0.856933	0.999049	AC104938.1	-0.0998996	-21.946	0.920424	0.999148	PPP1R12B	4.02501	0.737555	5.69731e-05	0.000205927	C3orf67	13.1296	4.96295	2.22938e-39	8.80018e-39	AL359922.1	0.0518608	0.408429	0.95864	0.99998
SYT14	6.30275	1.12785	2.92416e-10	9.40245e-10	AC131934.1	-0.181142	-0.0362426	0.856256	0.999049	AC022973.4	-0.0998996	-22.1996	0.920424	0.999148	KDM4C	3.97631	0.410489	6.99916e-05	0.000251768	IL1R2	13.0814	1.53451	4.20456e-39	1.65751e-38	TMEM92-AS1	0.0507464	1.67717	0.959528	0.99998
SAMHD1	6.2971	0.234003	3.03271e-10	9.74103e-10	ANO3	-0.182943	-22.5552	0.854843	0.999049	RBMS3-AS2	-0.0998996	-21.9283	0.920424	0.999148	GPR137C	3.97533	2.39492	7.02816e-05	0.000252509	ATG7	13.0707	1.84498	4.84204e-39	1.90631e-38	AP001107.6	0.0507365	1.59719	0.959535	0.99998
ST8SIA6	6.2544	1.51268	3.9904e-10	1.27898e-09	MORC2-AS1	-0.182943	-22.596	0.854843	0.999049	CARMIL3	-0.0998996	-21.97	0.920424	0.999148	NDRG1	3.95859	0.309961	7.53934e-05	0.000269905	ARHGAP44	12.9917	4.48164	1.3633e-38	5.36027e-38	TMEM132C	0.0500856	-0.0188006	0.960054	0.99998
PEAK1	6.24807	0.527019	4.15561e-10	1.32909e-09	AL356421.2	-0.183453	-2.50794	0.854443	0.999049	NLRC3	-0.0998996	-22.0619	0.920424	0.999148	EFCAB10	3.95603	0.241784	7.62047e-05	0.000272484	MAML2	12.9802	1.45888	1.58553e-38	6.2259e-38	FAM110B	0.0498884	-0.112379	0.960211	0.99998
PABPC1	6.22508	1.81094	4.81325e-10	1.53614e-09	AL135926.1	-0.183954	-1.53548	0.854049	0.999049	SPARCL1	-0.100881	-0.194547	0.919645	0.999148	TET3	3.92752	0.730407	8.58246e-05	0.000306517	KCNN3	12.9474	4.7001	2.42905e-38	9.52568e-38	AC002429.2	0.0489909	0.210097	0.960927	0.99998
NAALADL2	6.22415	0.663203	4.84161e-10	1.54355e-09	SPATA45	-0.183954	-1.51284	0.854049	0.999049	LINC02334	-0.101548	-1.47412	0.919116	0.999148	ADCY9	3.92279	0.982505	8.75309e-05	0.00031199	KPNA2	12.9468	1.51757	2.44872e-38	9.5903e-38	AC009690.1	0.0486852	0.123523	0.96117	0.99998
KRT6A	6.20629	1.26248	5.42501e-10	1.72588e-09	ACSL3-AS1	-0.183954	-1.54531	0.854049	0.999049	KRTAP2-3	-0.101551	-1.70076	0.919113	0.999148	ZNF440	3.91014	0.320803	9.22441e-05	0.000327882	FRY	12.9425	4.77003	2.5908e-38	1.01335e-37	SPDYE2B	0.046476	1.70367	0.962931	0.99998
NME7	6.15863	0.219552	7.33773e-10	2.33191e-09	LINC00390	-0.183954	-1.43291	0.854049	0.999049	AC006511.5	-0.101551	-1.41621	0.919113	0.999148	HS2ST1	3.89747	0.978251	9.72019e-05	0.000345096	GMNC	12.8531	2.03768	8.26671e-38	3.22919e-37	CBY2	0.0463774	0.920509	0.963009	0.99998
ZBTB20	6.14025	0.457828	8.23912e-10	2.61559e-09	CD38	-0.184456	-1.23017	0.853656	0.999049	AC090607.1	-0.101554	-1.499	0.919111	0.999148	EFNA5	3.88759	0.600526	0.000101243	0.000358595	PCDH7	12.8448	1.58473	9.19686e-38	3.58785e-37	LINC00862	0.0463577	0.907396	0.963025	0.99998
MRTFA	6.09648	0.807108	1.0843e-09	3.43132e-09	SCIMP	-0.184456	-1.2015	0.853656	0.999049	LY86	-0.101557	-1.6384	0.919108	0.999148	PREX2	3.87107	0.311956	0.00010836	0.000382896	AHNAK	12.8173	2.18256	1.31161e-37	5.11018e-37	LINC01950	0.0463182	0.868086	0.963057	0.99998
FCGBP	6.00073	1.91362	1.96427e-09	6.17695e-09	AP002812.2	-0.184802	0.280982	0.853384	0.999049	TUBA8	-0.101557	-1.61592	0.919108	0.999148	ARRDC3-AS1	3.83717	0.926104	0.00012446	0.000437726	CCDC190	12.7576	4.97504	2.82819e-37	1.10046e-36	AC128687.3	0.0463084	0.689159	0.963064	0.99998
S100A10	5.96991	2.16341	2.37381e-09	7.4414e-09	ZMAT4	-0.184934	-0.819054	0.853281	0.999049	RARB	-0.10156	-1.82177	0.919106	0.999148	DIP2C	3.8356	0.456182	0.000125256	0.000440008	IFIT1	12.7339	2.40027	3.83364e-37	1.48976e-36	CACNA1C	0.0461999	0.515672	0.963151	0.99998
AL157931.1	5.9657	1.49793	2.43587e-09	7.62798e-09	AC100781.1	-0.184942	-0.941609	0.853275	0.999049	CCL5	-0.101566	-1.90847	0.919101	0.999148	ELF3	3.79801	0.284621	0.00014586	0.000510001	CLDN16	12.7251	4.274	4.28781e-37	1.66409e-36	PCP4L1	0.0461703	0.544035	0.963175	0.99998
ABL2	5.96314	0.983498	2.47431e-09	7.74028e-09	KCNN2	-0.185412	-0.644363	0.852906	0.999049	NALCN-AS1	-0.101569	-1.87933	0.919099	0.999148	KRT7	3.79037	1.67209	0.000150424	0.000524125	RUNDC3B	12.6653	3.62835	9.20863e-37	3.56463e-36	XKRX	0.0453912	0.688845	0.963796	0.99998
ARL15	5.96038	1.05695	2.51647e-09	7.86397e-09	KCNIP4	-0.185881	-0.301903	0.852538	0.999049	MDS2	-0.102104	0.496542	0.918674	0.999148	KLK6	3.77115	1.22757	0.000162494	0.00056487	NCOA7	12.5694	1.50125	3.11268e-36	1.20335e-35	AL359538.4	0.0450263	1.52725	0.964086	0.99998
HNF4G	5.94724	1.06731	2.72703e-09	8.50425e-09	AC139720.1	-0.187723	-0.126548	0.851094	0.999049	PIWIL2	-0.102479	-0.144715	0.918376	0.999148	PCNX2	3.76642	0.58884	0.000165606	0.000575019	GADD45B	12.5674	1.7958	3.19198e-36	1.23242e-35	LINC02449	0.0450263	1.55789	0.964086	0.99998
CCL28	5.94274	0.741556	2.80301e-09	8.73212e-09	AL451007.3	-0.190488	-2.34936	0.848927	0.999049	CD226	-0.102562	-0.291789	0.918311	0.999148	PDE3A	3.74766	1.39011	0.000178493	0.000618337	CKS1B	12.5344	1.5016	4.8389e-36	1.8659e-35	AC020663.1	0.0448093	0.683435	0.964259	0.99998
KIF26B	5.84815	1.12238	4.97056e-09	1.54206e-08	AP000866.2	-0.190496	-2.75774	0.848921	0.999049	AL365273.2	-0.103181	-0.788067	0.91782	0.999148	DUSP5	3.70623	0.906757	0.000210371	0.000726251	MIR99AHG	12.5252	2.57211	5.43649e-36	2.09364e-35	ADAMTSL4-AS1	0.0436258	0.0461248	0.965203	0.99998
FGF14	5.84029	0.508637	5.21101e-09	1.61498e-08	AC138969.1	-0.190988	-1.47801	0.848535	0.999049	LINC01695	-0.103193	-0.978638	0.91781	0.999148	CCDC7	3.6883	0.987768	0.000225758	0.000775801	TCTEX1D1	12.4841	4.9467	9.12159e-36	3.5083e-35	TLE4	0.0435864	-0.0348267	0.965234	0.99998
IFIT1	5.78144	0.841889	7.40621e-09	2.28117e-08	ZBTB20-AS5	-0.190988	-1.60421	0.848535	0.999049	AC023389.2	-0.103199	-0.964533	0.917805	0.999148	CCN1	3.68798	0.28342	0.000226038	0.000775875	NFIA	12.4748	1.50457	1.02494e-35	3.93701e-35	C17orf77	0.0432412	0.195589	0.965509	0.99998
LYZ	5.77866	2.56465	7.52984e-09	2.31687e-08	KCNK9	-0.190993	-1.66983	0.848531	0.999049	AC015845.1	-0.103205	-0.925144	0.9178	0.999148	NETO2	3.65458	2.15051	0.0002576	0.000882193	KIAA0319	12.442	5.28549	1.54584e-35	5.93033e-35	AC024084.2	0.0405093	0.452543	0.967687	0.99998
COL25A1	5.76783	1.696	8.02994e-09	2.46822e-08	LINC01876	-0.191112	0.0842274	0.848438	0.999049	STK31	-0.10405	0.0173712	0.91713	0.999148	TEX9	3.64942	0.234263	0.000262837	0.000899099	LAMA3	12.3908	1.46153	2.93012e-35	1.12265e-34	AL133297.2	0.0403811	0.199806	0.967789	0.99998
MICU3	5.73761	1.2595	9.60208e-09	2.93941e-08	AC073316.1	-0.191491	-1.22661	0.848141	0.999049	AC110491.2	-0.104808	-0.43239	0.916528	0.999148	SLC10A7	3.59889	0.930652	0.000319577	0.00108947	KLHL32	12.3765	4.78843	3.50364e-35	1.34068e-34	KANSL1L-AS1	0.039888	0.0976603	0.968182	0.99998
KIAA0556	5.64684	0.393964	1.6342e-08	4.9874e-08	LINC00862	-0.191494	-1.26002	0.848139	0.999049	TMEM92-AS1	-0.104826	-0.730187	0.916514	0.999148	ICAM1	3.59261	0.862347	0.000327384	0.00111355	CDKAL1	12.3744	1.86661	3.59677e-35	1.37456e-34	AL359762.3	0.0398584	0.0591378	0.968206	0.99998
RBMS3	5.64364	1.94981	1.66494e-08	5.07603e-08	AC022395.1	-0.192441	-0.611917	0.847397	0.999049	SLC7A9	-0.10545	-22.226	0.916019	0.999148	ZHX2	3.58617	0.881275	0.000335567	0.00114009	USP53	12.3598	1.42075	4.31179e-35	1.64572e-34	AL132990.1	0.0391582	0.574374	0.968764	0.99998
NEK11	5.61349	0.201029	1.98289e-08	6.03927e-08	NPIPB12	-0.193447	-0.475967	0.846609	0.999049	AC008731.1	-0.10545	-22.0983	0.916019	0.999148	RPL10	3.52922	1.35656	0.000416788	0.00140648	KIAA2012	12.3272	4.3632	6.4676e-35	2.46541e-34	LINC00923	0.0391483	0.635665	0.968772	0.99998
MCTP2	5.60433	1.1753	2.09059e-08	6.35436e-08	AC087286.2	-0.194299	-0.248429	0.845942	0.999049	AC129926.1	-0.10545	-22.058	0.916019	0.999148	RPS3	3.52825	0.840362	0.000418313	0.00141004	CP	12.2663	1.75242	1.37365e-34	5.22301e-34	TEX26	0.0389018	-0.174161	0.968969	0.99998
CHCHD2	5.60192	2.72251	2.11985e-08	6.4368e-08	NAV3	-0.195159	-0.0628307	0.845269	0.999049	AP003783.1	-0.10545	-22.5995	0.916019	0.999148	WDR7	3.52674	0.812319	0.000420712	0.00141654	TNFAIP3	12.2621	1.85204	1.4478e-34	5.49104e-34	AL591806.4	0.0375802	-0.131088	0.970022	0.99998
KRT17	5.58842	0.411844	2.2914e-08	6.9389e-08	AL133464.1	-0.197015	-22.6912	0.843815	0.999049	AC023480.1	-0.10545	-22.1324	0.916019	0.999148	ZNF407	3.50485	0.681849	0.000456868	0.00153483	PPM1H	12.236	1.77231	1.9969e-34	7.56401e-34	AC004594.1	0.0374619	-0.0910817	0.970117	0.99998
MAGI1	5.57739	0.444132	2.44158e-08	7.38382e-08	HOPX	-0.197015	-23.1401	0.843815	0.999049	TGIF2-RAB5IF	-0.10545	-22.1053	0.916019	0.999148	ROBO2	3.47868	0.496478	0.000503886	0.00168336	NPC2	12.2343	2.2245	2.03802e-34	7.71003e-34	ST8SIA1	0.0373978	0.00436899	0.970168	0.99998
TANC2	5.56665	0.688324	2.59679e-08	7.84529e-08	ESM1	-0.197522	-2.37877	0.843419	0.999049	LINC02154	-0.10545	-22.2975	0.916019	0.999148	KIF9-AS1	3.45227	1.05659	0.000555899	0.00185506	DEPP1	12.1662	3.56682	4.70388e-34	1.77729e-33	ABCA12	0.0371857	0.30618	0.970337	0.99998
UST	5.54532	1.89007	2.9342e-08	8.84682e-08	AC027319.1	-0.197522	-2.54262	0.843419	0.999049	AC090772.2	-0.10545	-22.157	0.916019	0.999148	DYNLL1	3.44421	1.43235	0.000572733	0.00190699	DEUP1	12.1652	5.78418	4.76378e-34	1.79765e-33	AC130324.2	0.0360713	0.0678011	0.971225	0.99998
SNED1	5.52448	0.591476	3.30471e-08	9.95395e-08	TMEM92-AS1	-0.198022	-1.63884	0.843028	0.999049	AL354811.1	-0.10545	-22.219	0.916019	0.999148	CALN1	3.42487	1.67703	0.000615085	0.0020451	S100A2	12.162	1.57209	4.9523e-34	1.86645e-33	AC034195.1	0.0360713	0.18492	0.971225	0.99998
DUSP5	5.50899	1.03714	3.609e-08	1.08378e-07	LINC02577	-0.198035	-1.95915	0.843018	0.999049	KRT14	-0.10545	-22.3017	0.916019	0.999148	NPHP1	3.42466	0.142786	0.000615576	0.0020451	WDR44	12.087	2.15361	1.23742e-33	4.64615e-33	ZNF664	0.0360516	0.151501	0.971241	0.99998
DPYD	5.47907	0.782819	4.27557e-08	1.28139e-07	ANGPT1	-0.19804	-1.76293	0.843014	0.999049	AC090907.1	-0.107096	-1.45506	0.914713	0.999148	ANKRD36C	3.39529	0.458065	0.000685562	0.00227007	XIST	12.0578	1.3865	1.76336e-33	6.6126e-33	CD226	0.0348484	0.487928	0.972201	0.99998
PRKCH	5.44938	0.7927	5.05447e-08	1.51181e-07	LINC02449	-0.198515	-1.24204	0.842642	0.999049	AC116667.1	-0.107096	-1.51545	0.914713	0.999148	SCGB3A1	3.38438	0.866106	0.000713396	0.00235704	PLEKHA5	12.0505	1.37836	1.92726e-33	7.21819e-33	AC007619.1	0.0347498	0.336305	0.972279	0.99998
PRIM2	5.42784	0.587605	5.70408e-08	1.70441e-07	SCN5A	-0.198996	-0.880892	0.842266	0.999049	GMFG	-0.107099	-1.52319	0.91471	0.999148	PTPDC1	3.38169	1.22893	0.000720423	0.00237763	MACC1	12.0465	1.42081	2.02467e-33	7.57358e-33	AL163952.1	0.0346216	0.0827935	0.972382	0.99998
RPGR	5.42084	0.196748	5.93201e-08	1.77075e-07	AQP4-AS1	-0.199938	-0.507959	0.841529	0.999049	AC116158.3	-0.107102	-1.58769	0.914708	0.999148	ABL2	3.37713	0.691112	0.000732466	0.00241472	GLIS3	11.9817	1.46584	4.42897e-33	1.65466e-32	AC022395.1	0.0346018	0.0161193	0.972397	0.99998
TET3	5.38399	0.766397	7.28523e-08	2.16822e-07	CACNA2D3	-0.201753	-0.153698	0.84011	0.999049	DKK2	-0.107102	-1.59123	0.914708	0.999148	DLGAP1	3.3232	0.663862	0.000889902	0.0029241	SLCO3A1	11.9682	3.03995	5.21373e-33	1.94542e-32	AC025034.1	0.0341531	-0.189679	0.972755	0.99998
SCGB2A2	5.38106	0.620843	7.40478e-08	2.20162e-07	CCN5	-0.204557	-2.79314	0.837918	0.999049	AC012443.2	-0.107105	-1.6954	0.914705	0.999148	SAMD12	3.3126	0.852793	0.000924319	0.00303387	ESRRG	11.9545	2.12303	6.14766e-33	2.29105e-32	NBEA	0.034089	0.0825198	0.972806	0.99998
TCF7L1	5.34958	1.86904	8.8157e-08	2.61593e-07	FNDC1	-0.205548	-1.21548	0.837144	0.999049	FCER1G	-0.107105	-1.77136	0.914705	0.999148	CAMKMT	3.28777	0.337147	0.00100985	0.00331097	TDRD9	11.8563	5.26943	1.99508e-32	7.41665e-32	ZNRF2	0.0333	0.407544	0.973435	0.99998
RASD1	5.33031	1.45684	9.80466e-08	2.90365e-07	C17orf77	-0.20555	-1.2712	0.837142	0.999049	AC007563.2	-0.108071	-0.312725	0.91394	0.999148	PLXDC2	3.28161	0.258822	0.00103217	0.00338048	SGO2	11.7401	2.04952	7.93632e-32	2.94665e-31	AC008770.2	0.0331817	0.0933188	0.97353	0.99998
SLC10A7	5.32141	1.1652	1.02963e-07	3.04626e-07	TRIM74	-0.206035	-0.993104	0.836764	0.999049	AC005914.1	-0.108658	0.346415	0.913474	0.999148	STXBP4	3.27792	0.49073	0.00104575	0.00342122	PTHLH	11.6754	5.0623	1.70223e-31	6.30454e-31	LRRC8C-DT	0.0320919	0.0535681	0.974399	0.99998
ZNF407	5.27753	0.800944	1.30934e-07	3.86997e-07	TSBP1-AS1	-0.2065	-0.683229	0.8364	0.999049	AP000866.2	-0.108731	-0.744283	0.913416	0.999148	TDO2	3.27441	1.01201	0.00105883	0.00346023	PKN2-AS1	11.5796	4.01445	5.23155e-31	1.93284e-30	YIPF7	0.0318009	0.211276	0.974631	0.99998
LRMDA	5.27278	0.526747	1.34371e-07	3.96766e-07	YIPF7	-0.206508	-0.653409	0.836394	0.999049	UNC13C	-0.10874	-0.969403	0.913409	0.999148	PSD3	3.26501	0.64483	0.0010946	0.00357323	SH3BGRL3	11.5577	1.69382	6.75093e-31	2.49112e-30	KIF5C-AS1	0.0317122	0.0306109	0.974702	0.99998
TSPAN1	5.24111	0.654353	1.59613e-07	4.70371e-07	TPTE2	-0.206516	-0.826802	0.836388	0.999049	RBP2	-0.108746	-0.837841	0.913404	0.999148	PAEP	3.26192	0.00219166	0.00110661	0.0036085	ACTR3C	11.5295	2.90483	9.36328e-31	3.45084e-30	AC231533.1	0.0307161	1.28742	0.975496	0.99998
GPR160	5.20805	0.751688	1.90838e-07	5.61288e-07	AC022335.1	-0.206966	-0.54056	0.836036	0.999049	GNA14	-0.108752	-1.04667	0.913399	0.999148	GPR160	3.25555	0.616886	0.00113175	0.00368647	SMIM41	11.4882	5.40426	1.51261e-30	5.56788e-30	SOD2	0.0305583	0.537765	0.975622	0.99998
C15orf41	5.18573	1.1133	2.15169e-07	6.3161e-07	APBA1	-0.207435	-0.378236	0.83567	0.999049	AC002429.2	-0.110414	-0.764241	0.912081	0.999148	AC073529.1	3.23459	2.26302	0.00121816	0.00395935	HDAC9	11.4653	1.88845	1.97159e-30	7.24848e-30	ADGRV1	0.0305386	0.416494	0.975638	0.99998
NEAT1	5.13557	1.69751	2.81284e-07	8.24879e-07	AL135978.2	-0.207443	-0.438767	0.835664	0.999049	NEURL3	-0.111	-22.1834	0.911617	0.999148	RAPGEF5	3.21961	0.729019	0.00128365	0.00416318	TBC1D19	11.4242	2.02554	3.16461e-30	1.16204e-29	PLAC8L1	0.0304991	0.396171	0.975669	0.99998
RBP4	5.13175	2.181	2.87062e-07	8.41001e-07	HPN-AS1	-0.211592	-2.6008	0.832425	0.999049	AC097716.1	-0.111	-22.1606	0.911617	0.999148	SCFD2	3.18826	1.03275	0.00143132	0.00463211	DRAIC	11.4196	4.89003	3.33926e-30	1.22467e-29	ZSCAN31	0.0304449	0.0357835	0.975712	0.99998
TNRC6C	5.10326	0.882529	3.33845e-07	9.76156e-07	DMRTA2	-0.211595	-2.76837	0.832423	0.999049	AC091132.4	-0.111	-22.0967	0.911617	0.999148	MKX	3.1871	0.668924	0.00143708	0.00464574	FSIP1	11.327	4.49707	9.64999e-30	3.53048e-29	LINC01353	0.0304399	0.287904	0.975716	0.99998
CDKAL1	5.08774	0.363779	3.62362e-07	1.0585e-06	VCAN	-0.211598	-2.76334	0.832421	0.999049	AC010327.7	-0.111	-22.1497	0.911617	0.999148	CCNO	3.14004	0.0632165	0.00168926	0.00544338	STC1	11.2646	1.45241	1.96305e-29	7.15572e-29	AP001372.1	0.0293058	1.34436	0.976621	0.99998
CSPP1	4.86744	0.159319	1.13053e-06	3.28643e-06	MYH7B	-0.212089	-1.54996	0.832038	0.999049	IL12RB2	-0.111	-22.1973	0.911617	0.999148	SFRP1	3.1217	0.898367	0.00179811	0.00577551	CNTN3	11.2298	2.82746	2.91187e-29	1.06015e-28	AP001025.1	0.0292663	1.14485	0.976652	0.99998
ALDH3A1	4.86677	0.787701	1.13435e-06	3.29433e-06	SLC22A17	-0.212094	-1.80752	0.832034	0.999049	AC010623.1	-0.111	-22.2115	0.911617	0.999148	SUFU	3.11258	0.880958	0.00185458	0.00593783	HSPB1	11.2037	1.88067	3.91153e-29	1.42237e-28	RHCE	0.0292367	0.875332	0.976676	0.99998
SCFD2	4.86554	1.38861	1.14143e-06	3.3117e-06	PLA2G3	-0.212094	-1.86056	0.832034	0.999049	LINC01805	-0.111117	0.188182	0.911524	0.999148	KANK1	3.10869	0.648543	0.00187916	0.00601012	ERBB4	11.1838	1.90709	4.89551e-29	1.77803e-28	ZNF385D	0.0288718	-0.0909753	0.976967	0.99998
AL050309.1	4.86228	0.730914	1.16041e-06	3.36351e-06	PDE3B	-0.212588	-1.42014	0.831648	0.999049	KPNA7	-0.111172	0.0400672	0.91148	0.999148	LINC01505	3.0925	1.27838	0.00198477	0.00632764	AP002381.2	11.1819	3.83102	4.99965e-29	1.81366e-28	AC005487.1	0.0286845	0.591348	0.977116	0.99998
PLAAT4	4.78742	0.276774	1.68938e-06	4.88261e-06	AL353588.1	-0.21259	-1.37599	0.831646	0.999049	AC017002.4	-0.112651	-1.78974	0.910307	0.999148	ZSCAN5A	3.0809	0.673073	0.00206377	0.00656553	TSHZ2	11.1472	1.25898	7.38845e-29	2.67698e-28	PSMD6-AS2	0.0282012	0.343108	0.977502	0.99998
CXCL6	4.76266	0.955224	1.9106e-06	5.50607e-06	ZNF664	-0.213058	-0.902011	0.831282	0.999049	PTPRD	-0.112651	-1.61174	0.910307	0.999148	NLGN1	3.07685	2.57542	0.00209204	0.0066414	FABP6	11.1443	4.44199	7.63741e-29	2.76384e-28	LURAP1	0.0279053	-0.0359161	0.977738	0.99998
UBASH3B	4.73236	1.04485	2.21929e-06	6.37726e-06	PLAC8L1	-0.21353	-0.749421	0.830914	0.999049	A2M	-0.112651	-1.69429	0.910307	0.999148	NLK	3.07303	0.806175	0.00211899	0.00671985	AC009163.1	11.1225	3.37164	9.75281e-29	3.52511e-28	AC025442.2	0.0277673	0.801136	0.977848	0.99998
SAMD12	4.70302	0.970066	2.56341e-06	7.35203e-06	G2E3-AS1	-0.214013	-0.6407	0.830537	0.999049	AC026894.3	-0.112651	-1.62691	0.910307	0.999148	ARL15	3.06699	0.613747	0.00216224	0.00684975	LINC01320	11.0598	1.31144	1.96535e-28	7.0781e-28	SLC28A1	0.0275503	0.21726	0.978021	0.99998
TIAM2	4.69905	0.677625	2.61375e-06	7.47889e-06	AL157834.4	-0.214016	-0.662137	0.830535	0.999049	AL691420.1	-0.112657	-1.96039	0.910303	0.999148	ST6GALNAC5	3.03823	0.625775	0.0023797	0.00749907	ETV6	11.0431	1.28751	2.36806e-28	8.51821e-28	AQP4-AS1	0.0273925	-0.154014	0.978147	0.99998
CCDC34	4.66607	0.218571	3.0702e-06	8.76365e-06	LINC01290	-0.217452	0.0278747	0.827856	0.999049	ANKUB1	-0.113291	0.528526	0.9098	0.999148	CTXN1	3.01473	0.212251	0.00257204	0.00808818	KDM4C	11.0423	1.61766	2.38736e-28	8.57736e-28	HECW1	0.026357	0.988667	0.978973	0.99998
KLK6	4.57782	1.32971	4.69847e-06	1.33987e-05	AC116366.3	-0.217476	-0.0209226	0.827837	0.999049	AL512656.2	-0.114287	-0.947737	0.90901	0.999148	ZNF814	3.01215	1.14127	0.00259403	0.00814879	PLK2	10.9593	1.47779	5.99926e-28	2.15284e-27	PRKCQ	0.0262386	0.411666	0.979067	0.99998
SUFU	4.56902	1.11224	4.90019e-06	1.39607e-05	AL645465.1	-0.217487	0.0282533	0.827829	0.999049	AC027601.1	-0.11429	-1.09256	0.909008	0.999148	CYP1B1	2.99719	0.422857	0.00272482	0.0085507	IFIT3	10.8845	1.75325	1.36706e-27	4.89401e-27	FOXO1	0.0262337	-0.345938	0.979071	0.99998
AC046134.2	4.50996	0.340678	6.48402e-06	1.84555e-05	AL117334.2	-0.218124	-22.8309	0.827332	0.999049	CORO2B	-0.11429	-0.917879	0.909008	0.999148	PRSS2	2.97621	1.32247	0.0029184	0.00913903	ARRDC3-AS1	10.8577	2.61407	1.83269e-27	6.54533e-27	STK31	0.0259625	-0.132863	0.979287	0.99998
H2BC5	4.50237	0.283178	6.71993e-06	1.91088e-05	AC020663.5	-0.21863	-2.67157	0.826938	0.999049	AL031587.2	-0.114293	-1.07163	0.909006	0.999148	LARGE1	2.96945	0.719603	0.00298328	0.00933248	DUSP23	10.8337	1.61825	2.3845e-27	8.50595e-27	H2AC6	0.0253461	0.0444124	0.979779	0.99998
GAB1	4.4958	0.820306	6.93086e-06	1.96899e-05	KCNIP2-AS1	-0.21913	-2.00738	0.826549	0.999049	GPC5	-0.114296	-1.13718	0.909003	0.999148	NFATC2	2.95181	0.862197	0.00315913	0.00987228	DENND1A	10.7926	1.71981	3.73228e-27	1.32979e-26	TMEM170A	0.0249171	0.534227	0.980121	0.99998
KANK1	4.48539	0.74679	7.27796e-06	2.06565e-05	AC017104.1	-0.219609	-1.33681	0.826175	0.999049	AC090517.4	-0.114336	-1.45428	0.908972	0.999148	LRP5L	2.9432	1.05585	0.00324834	0.0101405	CLTCL1	10.7299	4.00148	7.36548e-27	2.61806e-26	C4orf36	0.0249171	0.510385	0.980121	0.99998
ATAD2	4.30491	0.132782	1.67051e-05	4.73231e-05	AC063944.1	-0.219609	-1.24122	0.826175	0.999049	CD38	-0.115908	-0.527283	0.907726	0.999148	CREB5	2.93184	1.15333	0.0033696	0.0104754	AKAP13	10.6745	1.29391	1.33974e-26	4.75646e-26	LMNB1-DT	0.0248184	0.344778	0.9802	0.99998
MMP26	4.29015	2.20525	1.78549e-05	5.05328e-05	AC027682.4	-0.219609	-1.3055	0.826175	0.999049	AC011092.2	-0.115929	-0.695927	0.907709	0.999148	FRMD5	2.92605	1.12901	0.00343297	0.0106519	ENPP3	10.628	1.83023	2.20907e-26	7.83358e-26	G2E3-AS1	0.0246902	0.0415141	0.980302	0.99998
THRB	4.27615	1.03529	1.90151e-05	5.37655e-05	AC003991.1	-0.220097	-1.01232	0.825796	0.999049	Z99127.1	-0.116549	-22.3114	0.907217	0.999148	ENDOG	2.9186	0.0920736	0.00351602	0.0108855	MBD5	10.6195	1.50205	2.41735e-26	8.56206e-26	LINC02240	0.0245916	-0.0649278	0.980381	0.99998
CCDC7	4.27272	0.992519	1.931e-05	5.4548e-05	RHCE	-0.220573	-0.860745	0.825425	0.999049	LINC02831	-0.116549	-22.21	0.907217	0.999148	TFF1	2.90387	1.1539	0.00368576	0.0113993	ANK2	10.6189	4.27162	2.4343e-26	8.61191e-26	SNAP25	0.0240097	0.0145658	0.980845	0.99998
AC002066.1	4.26604	1.75882	1.98975e-05	5.61546e-05	AP001107.6	-0.225667	-2.90361	0.82146	0.999049	LINC01502	-0.116549	-22.322	0.907217	0.999148	ZNF438	2.90018	0.842043	0.00372945	0.0115225	TREM1	10.569	5.33221	4.15021e-26	1.46478e-25	CWH43	0.0232503	0.108943	0.981451	0.99998
RGS6	4.253	0.842987	2.10925e-05	5.94712e-05	AC020663.1	-0.226172	-2.21725	0.821068	0.999049	H4C1	-0.116549	-22.1989	0.907217	0.999148	CETN2	2.89746	0.662552	0.00376198	0.0116111	SLC51B	10.5672	3.69857	4.22724e-26	1.49022e-25	MYRIP	0.021771	0.121714	0.982631	0.99998
PADI1	4.25191	1.68658	2.11957e-05	5.97063e-05	AC092718.1	-0.226642	-1.18502	0.820702	0.999049	AC114689.3	-0.116549	-22.3836	0.907217	0.999148	ZNF492	2.89613	3.18288	0.003778	0.0116485	ZSWIM6	10.5643	1.5168	4.35999e-26	1.53521e-25	AC007285.1	0.0203804	-0.322243	0.98374	0.99998
AL139383.1	4.2197	1.3296	2.44629e-05	6.86516e-05	AC022826.2	-0.226642	-1.25456	0.820702	0.999049	FLRT1	-0.116717	0.102459	0.907084	0.999148	LRMDA	2.89533	0.359728	0.00378758	0.011666	DPP6	10.5152	3.3383	7.35302e-26	2.58303e-25	AC012409.2	0.0202029	-0.391141	0.983882	0.99998
EZH2	4.20167	0.143107	2.64955e-05	7.41478e-05	AL138927.1	-0.226666	-1.53435	0.820684	0.999049	LAYN	-0.116873	0.292591	0.906961	0.999148	QPRT	2.88119	0.22877	0.0039618	0.0121652	INSIG1	10.5085	1.4451	7.89562e-26	2.77039e-25	AL109930.1	0.0193745	0.0602066	0.984542	0.99998
KLHL22	4.14936	0.994673	3.33406e-05	9.29569e-05	AC129492.1	-0.227119	-1.088	0.820331	0.999049	AP000424.1	-0.117323	0.230808	0.906604	0.999148	SLC16A1-AS1	2.8659	0.880753	0.00415822	0.0127292	ERO1A	10.4968	1.47115	8.93744e-26	3.13228e-25	ABCA13	0.0189356	-0.161147	0.984892	0.99998
IFT27	4.10436	0.0279367	4.05437e-05	0.000112517	AC008892.1	-0.227119	-0.953165	0.820331	0.999049	AP000779.1	-0.117577	-0.605222	0.906403	0.999148	PCED1B	2.85382	0.52347	0.00431974	0.0132102	SERPINE1	10.3826	4.40355	2.97585e-25	1.04051e-24	AL139142.1	0.0188616	-0.131443	0.984951	0.99998
QPCT	4.06508	0.343065	4.8015e-05	0.000133006	INKA1	-0.227619	-0.984787	0.819943	0.999049	AC011815.2	-0.118196	-1.63831	0.905912	0.999148	B9D2	2.85207	0.141141	0.00434356	0.0132695	C6	10.3821	5.05398	2.98988e-25	1.04419e-24	AL355802.3	0.0173034	-0.444197	0.986195	0.99998
TBC1D32	4.05959	0.497232	4.91596e-05	0.000136051	EBF1	-0.228516	-0.550235	0.819245	0.999049	AL118556.2	-0.118196	-1.64518	0.905912	0.999148	SNED1	2.83127	0.378757	0.0046363	0.0141351	CENPF	10.3739	1.36832	3.2579e-25	1.13648e-24	WNT4	0.0171456	0.271473	0.98632	0.99998
DAPL1	4.05804	1.91167	4.94855e-05	0.000136826	AC103923.1	-0.228529	-0.56537	0.819235	0.999049	PRKCB	-0.118196	-1.68614	0.905912	0.999148	MAGI1	2.81968	0.261548	0.00480715	0.0146411	CHST9	10.3408	4.62706	4.60553e-25	1.60285e-24	DOK6	0.0163369	0.444799	0.986966	0.99998
KIF3A	4.04689	0.0902174	5.19023e-05	0.000143376	ZCCHC12	-0.228972	-0.443246	0.818891	0.999049	AL139106.1	-0.118196	-1.8521	0.905912	0.999148	CDKN1C	2.80187	0.285155	0.0050807	0.0154272	CDC20	10.3007	1.8925	6.9981e-25	2.43271e-24	AP000311.1	0.0150893	0.0310104	0.987961	0.99998
TPD52	4.01383	0.909657	5.97413e-05	0.000164576	AL138479.2	-0.2327	-2.75601	0.815995	0.999049	AC007938.3	-0.118199	-1.70028	0.90591	0.999148	ANKRD1	2.78786	0.362968	0.00530576	0.0160943	MACROD2	10.2946	1.96394	7.45076e-25	2.58707e-24	FP671120.5	0.0149562	0.851013	0.988067	0.99998
L3MBTL4	4.00473	0.621719	6.2089e-05	0.000170731	AL360268.1	-0.232702	-2.92632	0.815992	0.999049	NCR3LG1	-0.118199	-1.82286	0.90591	0.999148	HNF4G	2.77861	0.584954	0.00545922	0.0165431	NF1	10.2875	1.16947	8.02011e-25	2.78154e-24	SPOCK2	0.0148674	0.27151	0.988138	0.99998
CKS2	3.98373	0.158422	6.78425e-05	0.000186381	SLC8A1-AS1	-0.232702	-2.70719	0.815992	0.999049	AL359094.1	-0.118202	-1.82058	0.905907	0.999148	IFIT1	2.75965	0.46536	0.00578632	0.0175166	PAX8	10.1942	1.46607	2.10568e-24	7.28608e-24	AL008633.1	0.0147589	0.219961	0.988225	0.99998
LINC00871	3.97429	0.78875	7.05909e-05	0.000193754	AC079336.4	-0.23319	-1.93404	0.815614	0.999049	LINC02652	-0.119831	-0.997614	0.904617	0.999148	TAPT1-AS1	2.75856	0.739361	0.00580566	0.0175574	FBXW7	10.191	1.55774	2.17548e-24	7.51894e-24	CACNB2	0.0145025	-0.127803	0.988429	0.99998
NLK	3.9738	0.838473	7.07357e-05	0.000193974	SPARCL1	-0.233192	-1.78608	0.815612	0.999049	APOA1-AS	-0.119831	-0.948637	0.904617	0.999148	DIRAS3	2.75635	0.979675	0.00584511	0.017659	SLC4A8	10.1764	4.17627	2.52729e-24	8.72481e-24	CHGA	0.0143694	-0.336881	0.988535	0.99998
SAA1	3.95016	0.991483	7.8099e-05	0.00021397	AC018695.9	-0.233192	-1.9407	0.815612	0.999049	CFAP44-AS1	-0.119846	-1.12334	0.904605	0.999148	MPPED2	2.75549	0.273118	0.00586036	0.0176872	AC083837.1	10.1194	3.24598	4.53263e-24	1.56297e-23	NOS1AP	0.0141425	-0.0946682	0.988716	0.99998
TRIM16	3.9426	1.20525	8.06033e-05	0.00022063	AC099521.2	-0.233195	-1.83811	0.81561	0.999049	AL450998.3	-0.119846	-1.06774	0.904605	0.999148	ZNF782	2.72542	0.90352	0.00642197	0.0193045	CST3	10.107	2.12815	5.14221e-24	1.77114e-23	SLFNL1	0.0132598	0.0557805	0.98942	0.99998
ANKMY1	3.93552	0.0866393	8.3018e-05	0.000227032	MEP1A	-0.233198	-2.01369	0.815608	0.999049	LINC01754	-0.120669	0.063185	0.903953	0.999148	KCNMA1	2.72387	0.460517	0.00645215	0.0193687	PATJ	10.1009	1.14318	5.47514e-24	1.88365e-23	AC107959.2	0.0132401	0.0458786	0.989436	0.99998
KLHDC1	3.91332	1.08111	9.10343e-05	0.000248728	AL137077.2	-0.233674	-1.45443	0.815238	0.999049	DST-AS1	-0.120685	-0.0935937	0.903941	0.999148	HDAC9	2.72366	0.267122	0.00645623	0.0193687	GPR39	10.0791	1.89909	6.83516e-24	2.34885e-23	LAX1	0.0130527	-0.202749	0.989586	0.99998
PRSS2	3.90194	1.54381	9.54247e-05	0.000260486	AP000688.1	-0.234619	-0.742251	0.814505	0.999049	CACNA1C	-0.121462	-0.734936	0.903325	0.999148	AL645568.1	2.70064	1.09118	0.00692057	0.0207203	PCSK5	10.0732	2.30602	7.26126e-24	2.49242e-23	AP006545.1	0.0106759	0.893181	0.991482	0.99998
PPIL6	3.89965	0.0330637	9.63322e-05	0.000262724	PRKCQ	-0.234622	-0.877516	0.814502	0.999049	SLC14A2	-0.121487	-0.844158	0.903306	0.999148	ZFPM2	2.67479	1.30185	0.00747764	0.0223213	SLC35F3	10.0497	3.0946	9.2145e-24	3.15926e-23	SPATA5	0.0103702	0.0744666	0.991726	0.99998
PHTF1	3.88175	0.0524727	0.000103706	0.000282578	WFDC10B	-0.234635	-0.893163	0.814492	0.999049	ATP12A	-0.122099	-22.3506	0.90282	0.999148	SLC2A13	2.67061	1.50012	0.00757127	0.0225783	SPIDR	10.0296	1.12754	1.13024e-23	3.87068e-23	FAM95C	0.0102716	-0.0980679	0.991805	0.99998
AC008014.1	3.87478	0.289156	0.000106721	0.000290004	AC026464.3	-0.235079	-0.608596	0.814147	0.999049	OBI1-AS1	-0.122099	-22.219	0.90282	0.999148	HSPA2	2.65235	0.126633	0.00799341	0.0237428	ANKRD36	9.97959	2.27836	1.87235e-23	6.40485e-23	AP003086.1	0.0101828	-0.403224	0.991875	0.99998
AL079338.1	3.86981	0.910471	0.000108922	0.000295715	AC093898.1	-0.235082	-0.55598	0.814145	0.999049	AC100821.2	-0.122099	-22.361	0.90282	0.999148	RFX3-AS1	2.62426	0.257251	0.00868386	0.0257172	XKR6	9.94051	1.51682	2.77392e-23	9.4781e-23	NLRP1	0.0098327	0.202312	0.992155	0.99998
ZNF782	3.8672	1.0643	0.000110092	0.000298623	AC010768.1	-0.235127	-0.829101	0.81411	0.999049	AL450992.4	-0.122099	-22.3577	0.90282	0.999148	MAP3K14	2.57721	0.99561	0.00996011	0.0293232	MICAL2	9.89987	2.98918	4.16828e-23	1.42262e-22	NEGR1	0.00867388	-0.342522	0.993079	0.99998
C20orf96	3.86314	0.0337595	0.000111941	0.000303362	TSNAX-DISC1	-0.236424	-0.271432	0.813104	0.999049	EWSAT1	-0.122099	-22.2976	0.90282	0.999148	FOXN3	2.57526	0.503394	0.0100166	0.0294606	BCAR3-AS1	9.89105	5.18044	4.55227e-23	1.55191e-22	MMP10	0.00786517	0.90635	0.993725	0.99998
AC108752.1	3.86014	0.9521	0.000113324	0.000306834	CD37	-0.240228	-1.96715	0.810153	0.999049	AC004900.1	-0.122099	-22.2307	0.90282	0.999148	TMCC3	2.56692	1.24788	0.0102607	0.030149	DGKH	9.86618	1.34731	5.83461e-23	1.98681e-22	AC139720.1	0.00731289	-0.424847	0.994165	0.99998
ADCY9	3.85411	0.750238	0.00011615	0.000314201	AL451069.2	-0.241197	-1.18664	0.809402	0.999049	CACNB4	-0.122099	-22.4749	0.90282	0.999148	TSGA10	2.56362	0.0234567	0.0103586	0.0304069	VTI1A	9.84712	1.33356	7.05399e-23	2.39932e-22	DDTL	0.006159	0.0120741	0.995086	0.99998
LEFTY1	3.81012	2.55946	0.0001389	0.00037473	LMNB1-DT	-0.24167	-1.0005	0.809036	0.999049	AC011933.4	-0.122099	-22.5044	0.90282	0.999148	ANKAR	2.56243	0.814787	0.0103942	0.0304815	CGNL1	9.75254	2.56828	1.79906e-22	6.11231e-22	AC012629.2	0.00589272	-0.223245	0.995298	0.99998
SLC35D2	3.80601	1.34709	0.000141227	0.000380666	RHCG	-0.246269	-23.0607	0.805474	0.999049	TBC1D24	-0.122099	-22.2347	0.90282	0.999148	MACROD2	2.53661	0.270421	0.0111933	0.0327288	FTO	9.73677	1.45791	2.10115e-22	7.1306e-22	FMN2	0.00578916	-0.300336	0.995381	0.99998
ZNF438	3.80289	0.923154	0.000143017	0.000384799	LINC01258	-0.246269	-22.9687	0.805474	0.999049	LRMP	-0.123051	-0.248531	0.902067	0.999148	SNAP25	2.53318	2.46999	0.0113034	0.0330186	WDFY3	9.71229	1.31771	2.67274e-22	9.06015e-22	AL356488.2	0.00458103	-0.126788	0.996345	0.99998
IL1RN	3.79258	1.13301	0.000149092	0.000400786	IL11	-0.246775	-3.04896	0.805082	0.999049	AC007656.2	-0.123084	-0.5386	0.90204	0.999148	SYT14	2.50863	0.498283	0.0121201	0.0352671	FOXN3	9.69033	2.24307	3.31456e-22	1.11978e-21	C2orf92	0.00450213	-0.00691167	0.996408	0.99998
GRIP1	3.7649	0.813886	0.000166618	0.000447497	CAPS2-AS1	-0.247257	-1.9533	0.80471	0.999049	ARHGAP28	-0.123745	-1.76064	0.901517	0.999148	LRWD1	2.49662	0.0708762	0.0125384	0.0364135	ADGRF1	9.65345	4.19934	4.75308e-22	1.60396e-21	ENOX1	0.00415695	-0.375463	0.996683	0.99998
SDK2	3.75362	1.7456	0.000174296	0.000467699	AL163952.1	-0.247747	-1.41009	0.804331	0.999049	HOPX	-0.123751	-2.17269	0.901513	0.999148	RPGR	2.47337	0.0599158	0.0133847	0.0387961	SCGB2A2	9.62305	2.12376	6.39076e-22	2.15419e-21	LINC00265	0.00321017	0.544572	0.997439	0.99998
MIR99AHG	3.75339	0.522111	0.000174457	0.000467713	AL359198.1	-0.248212	-1.07752	0.80397	0.999049	F2RL3	-0.123751	-1.84999	0.901513	0.999148	AC008014.1	2.46475	0.229296	0.0137109	0.0396651	WNT7A	9.61184	1.30049	7.12611e-22	2.39937e-21	C1QTNF7-AS1	0.00217463	0.121765	0.998265	0.99998
TK1	3.74547	0.117751	0.000180058	0.000481868	AP001372.1	-0.248239	-1.2152	0.80395	0.999049	DSC3	-0.123754	-1.9407	0.90151	0.999148	AC010997.3	2.43618	1.23364	0.0148432	0.0427758	UBE2D2	9.59668	1.77623	8.25641e-22	2.77682e-21	TP63	0.00209574	0.673973	0.998328	0.99998
SPACA9	3.74023	0.120199	0.00018385	0.000491578	AC068305.2	-0.248689	-0.896505	0.803602	0.999049	DMRTA2	-0.125372	-1.06321	0.900229	0.999148	SLC26A2	2.40619	0.0359605	0.0161198	0.0463658	AGR2	9.54876	2.03008	1.31261e-21	4.40967e-21	TMEM72-AS1	0.0019478	-0.0771071	0.998446	0.99998
LINC01170	3.72407	1.00087	0.00019604	0.000523704	LINC02185	-0.248697	-0.950821	0.803595	0.999049	HPN-AS1	-0.125378	-1.10376	0.900225	0.999148	CSF3	2.39761	1.21347	0.0165025	0.0473755	FYB2	9.54269	1.85042	1.39169e-21	4.67011e-21	PRKD1	0.000655842	-0.253834	0.999477	0.99998
SCAMP5	3.70552	1.32572	0.000210959	0.000562558	GPC5-AS1	-0.249607	-0.650158	0.802891	0.999049	AL135926.1	-0.125381	-1.02556	0.900222	0.999148	STOX1	2.38858	0.175131	0.0169135	0.0484626	KALRN	9.5263	3.37127	1.62987e-21	5.46325e-21	AC005914.1	0.000231764	-0.287258	0.999815	0.99998
PDE3A	3.69755	1.26703	0.000217693	0.00057897	AL359538.4	-0.253805	-2.8776	0.799647	0.999049	IGFL2-AS1	-0.125387	-1.13517	0.900217	0.999148	TANC2	2.38356	0.299571	0.0171462	0.0490359	AC074011.1	9.51417	4.31726	1.83174e-21	6.13306e-21	IMPG1	5.42426e-05	-0.640921	0.999957	0.99998
ANKAR	3.69266	0.93296	0.000221917	0.000589681	MARCHF4	-0.254306	-2.09426	0.799259	0.999049	INSYN2A	-0.125405	-1.18872	0.900203	0.999148	TNF	2.36658	1.04667	0.0179534	0.0512465	WNT4	9.48707	4.71089	2.37617e-21	7.94705e-21	LINC02026	2.46557e-05	-0.606199	0.99998	0.99998
CDS1	3.69215	0.0118148	0.000222366	0.000590352	AL132990.1	-0.25432	-2.24237	0.799249	0.999049	AL357673.2	-0.125689	0.31482	0.899978	0.999148	HP	2.35742	1.26682	0.0184027	0.0524292	NAV2	9.4761	1.14237	2.63967e-21	8.81851e-21	AC093523.2	-0.000922124	-0.0127724	0.999264	0.99998
XKR4	3.68097	1.98447	0.000232344	0.000615759	AL391361.2	-0.254787	-1.60003	0.798888	0.999049	AC020663.1	-0.12698	-0.551681	0.898956	0.999148	ZFAT	2.35095	1.05933	0.0187254	0.0532163	TANC2	9.46687	1.87603	2.88347e-21	9.62225e-21	CRB1	-0.00114896	-0.257629	0.999083	0.99998
TFF2	3.68097	1.19852	0.000232346	0.000615759	AL356311.1	-0.254787	-1.62435	0.798888	0.999049	S100A8	-0.127136	-1.24731	0.898833	0.999148	CCDC171	2.35082	0.344456	0.0187321	0.0532163	TUBA1B	9.41656	1.82823	4.66126e-21	1.55375e-20	AL022157.1	-0.00116868	-0.23803	0.999068	0.99998
LAMA2	3.64735	1.19278	0.00026496	0.000699719	SLC28A1	-0.255251	-1.22245	0.798529	0.999049	AL592156.1	-0.127649	-22.3836	0.898426	0.999148	RN7SL832P	2.34617	1.68881	0.0189673	0.0538334	PPM1E	9.40322	4.24681	5.29203e-21	1.7601e-20	AL357052.1	-0.00369343	0.598274	0.997053	0.99998
SYTL3	3.63576	0.108592	0.000277163	0.000730657	AC004830.2	-0.255254	-1.16749	0.798527	0.999049	AL135818.1	-0.127649	-22.3288	0.898426	0.999148	NRXN3	2.34568	0.18544	0.0189922	0.0538531	TOP2A	9.39018	1.25587	5.98992e-21	1.99001e-20	SLC25A21	-0.00425558	-0.520909	0.996605	0.99998
RAB42	3.61169	1.4828	0.000304206	0.000800543	TTC3-AS1	-0.255259	-1.2734	0.798523	0.999049	MB	-0.128555	0.522422	0.89771	0.999148	RAMP1	2.34501	0.190141	0.0190266	0.0538997	RSPH9	9.36907	4.44199	7.31777e-21	2.42846e-20	ZFAT	-0.00484238	-0.105562	0.996136	0.99998
CLDN10-AS1	3.59329	1.8445	0.000326527	0.000857776	AL353576.1	-0.255782	-0.961331	0.798119	0.999049	CD59	-0.128622	-0.567271	0.897657	0.999148	LINC00342	2.33824	0.195386	0.0193748	0.0548343	DSE	9.36067	2.7547	7.92334e-21	2.62652e-20	AC073842.2	-0.00508401	0.361407	0.995944	0.99998
ZDHHC1	3.57479	0.0267888	0.000350509	0.000919972	FAM95C	-0.256618	-0.608931	0.797474	0.999049	P4HA2-AS1	-0.12929	-1.68784	0.897128	0.999148	GRIP1	2.32784	0.62965	0.0199207	0.0562732	NFATC2	9.35521	2.68127	8.3433e-21	2.76268e-20	AL132712.1	-0.00512346	0.531783	0.995912	0.99998
ZNF814	3.53192	1.13214	0.000412557	0.00107811	AP006545.1	-0.256634	-0.612185	0.797461	0.999049	AC104335.2	-0.129299	-1.82873	0.897121	0.999148	LINC01473	2.30284	0.523504	0.0212879	0.0600222	SH3RF3	9.34954	4.10545	8.80296e-21	2.91167e-20	GRIP2	-0.00562643	-0.48463	0.995511	0.99998
SLIT2	3.52606	0.582315	0.000421794	0.00110033	AC124312.5	-0.257117	-0.659258	0.797088	0.999049	CC2D2B	-0.129299	-1.91432	0.897121	0.999148	AC024230.1	2.28733	-0.0100911	0.0221765	0.0624105	STAG3	9.33242	5.00465	1.03478e-20	3.41888e-20	AC006547.2	-0.00705647	-0.495446	0.99437	0.99998
ZBED2	3.52577	0.344163	0.00042225	0.00110056	AL022157.1	-0.257486	-0.321423	0.796804	0.999049	TTC3-AS1	-0.1302	-0.252844	0.896408	0.999148	AC053527.2	2.27174	1.11213	0.0231022	0.0649546	RSAD2	9.32993	3.18865	1.05945e-20	3.49652e-20	AC109927.1	-0.00834842	-0.349011	0.993339	0.99998
DPP4	3.49877	0.695994	0.000467402	0.00121508	DIAPH2-AS1	-0.25794	-0.321214	0.796454	0.999049	LINC01258	-0.130915	-0.765628	0.895842	0.999148	STARD13	2.26616	0.469907	0.0234416	0.0658472	CEBPD	9.30057	1.64147	1.39689e-20	4.60007e-20	AC008758.1	-0.00949245	0.264053	0.992426	0.99998
FOXN3	3.47905	0.546734	0.0005032	0.00130475	ADGRG3	-0.260342	-23.117	0.7946	0.999049	SAMD12-AS1	-0.130921	-0.993836	0.895837	0.999148	PCSK5	2.26159	0.417121	0.0237228	0.0665748	SOX4	9.27186	1.37218	1.82926e-20	6.01732e-20	AC011379.2	-0.0106513	-0.0592779	0.991502	0.99998
PRKN	3.46435	0.466407	0.000531509	0.00137697	PZP	-0.26084	-2.92642	0.794216	0.999049	AC103739.2	-0.130925	-1.00916	0.895835	0.999148	NR6A1	2.2369	1.36103	0.0252927	0.0707159	KRT5	9.18922	1.20688	3.95705e-20	1.29881e-19	GREB1L	-0.0109028	-0.314946	0.991301	0.99998
PPP1R12B	3.45892	0.414002	0.00054234	0.00140381	AC092171.2	-0.260845	-3.1077	0.794212	0.999049	SFMBT2	-0.130928	-1.02996	0.895833	0.999148	ACACB	2.23472	0.879951	0.0254357	0.0710493	NDRG1	9.16827	1.17556	4.80649e-20	1.5759e-19	CFLAR-AS1	-0.0111247	-0.356035	0.991124	0.99998
RGS2	3.4164	1.10255	0.000634552	0.00164108	AC126121.3	-0.260845	-2.99548	0.794212	0.999049	MED12L	-0.131757	0.0470802	0.895176	0.999148	PRKD1	2.23212	1.38769	0.0256073	0.0714622	CATSPERE	9.15073	3.53411	5.65503e-20	1.85208e-19	RBM44	-0.0127865	-0.372692	0.989798	0.99998
KLHL29	3.41134	0.719646	0.000646446	0.0016704	LY6H	-0.26085	-3.02214	0.794208	0.999049	AC092171.2	-0.132525	-0.544856	0.894569	0.999148	CXCR4	2.21407	0.477142	0.026824	0.0745319	KIF17	9.1442	5.1323	6.00722e-20	1.96529e-19	AXDND1	-0.0128456	-0.426961	0.989751	0.99998
PTCHD4	3.39837	2.00483	0.00067789	0.00174864	POF1B	-0.263214	-0.926975	0.792386	0.999049	PZP	-0.132532	-0.507211	0.894564	0.999148	AC092944.1	2.21145	1.01494	0.0270045	0.0749432	TMCC1	9.12809	1.12993	6.97177e-20	2.27836e-19	COL5A2	-0.0128752	-0.69739	0.989727	0.99998
GAN	3.39503	1.30843	0.000686207	0.00176857	AC027644.4	-0.263216	-0.823869	0.792384	0.999049	AC099521.2	-0.132538	-0.534673	0.894559	0.999148	NPAS3	2.2018	0.331279	0.0276793	0.076674	KANK1	9.11943	2.089	7.55184e-20	2.46524e-19	CEP250-AS1	-0.0129048	-0.8733	0.989704	0.99998
NME5	3.3913	-0.0871191	0.000695612	0.00179128	AC007014.1	-0.263227	-0.932331	0.792376	0.999049	AC018695.9	-0.132541	-0.685391	0.894557	0.999148	IL1R2	2.17539	0.106541	0.0296008	0.0817701	PLK4	9.03697	2.1037	1.61073e-19	5.25238e-19	SGIP1	-0.0150844	0.303115	0.987965	0.99998
HP	3.37718	1.62144	0.000732333	0.00188099	GAST	-0.263238	-1.02521	0.792367	0.999049	ARMC12	-0.133199	-22.4039	0.894036	0.999148	CLMN	2.1547	0.0719229	0.031185	0.0859881	VAV3	9.00778	3.14737	2.10269e-19	6.84915e-19	AC024145.1	-0.0153211	-0.242387	0.987776	0.99998
KIAA1211L	3.34697	0.0930013	0.000817005	0.0020931	FLRT1	-0.263251	-0.891961	0.792357	0.999049	AC104024.3	-0.133199	-22.3585	0.894036	0.999148	TTLL11	2.15071	0.941302	0.031499	0.0865358	SDK1	8.98478	1.65438	2.59248e-19	8.4354e-19	AL359555.1	-0.0157846	-21.0107	0.987406	0.99998
STX18-AS1	3.34584	1.11114	0.000820324	0.00209802	AC091078.1	-0.263648	-0.660928	0.792051	0.999049	AC092120.3	-0.133199	-22.536	0.894036	0.999148	ADGRL4	2.14926	0.843562	0.0316137	0.0867713	UCA1	8.96	1.10253	3.24686e-19	1.05532e-18	DYSF	-0.0157846	-21.1365	0.987406	0.99998
RAD51B	3.31971	0.251689	0.000901105	0.00230265	BASP1-AS1	-0.264108	-0.619119	0.791697	0.999049	AF130359.1	-0.133199	-22.4674	0.894036	0.999148	SETBP1	2.14392	0.892546	0.0320395	0.0878597	C4orf19	8.89078	1.40459	6.06803e-19	1.96801e-18	ALPK2	-0.0157846	-21.167	0.987406	0.99998
GDF15	3.29356	0.219059	0.000989277	0.00252367	AC026167.1	-0.264987	-0.293033	0.79102	0.999049	RRH	-0.133199	-22.3815	0.894036	0.999148	UBE3D	2.12662	0.460589	0.0334515	0.0915644	ASTN2	8.88487	2.99737	6.39926e-19	2.07319e-18	AC090578.1	-0.0157846	-21.2941	0.987406	0.99998
C11orf74	3.26797	0.0189005	0.00108322	0.00275863	EYS	-0.266988	-0.00642462	0.789478	0.999049	AC027243.4	-0.133199	-22.3712	0.894036	0.999148	RBMS3	2.0978	0.768325	0.0359225	0.0980596	SMC4	8.85878	1.06845	8.08952e-19	2.61797e-18	AC093382.1	-0.0157846	-21.3909	0.987406	0.99998
UBE3D	3.25493	0.585477	0.00113421	0.00288603	SOBP	-0.267378	-23.1339	0.789178	0.999049	POU3F1	-0.133199	-22.4662	0.894036	0.999148	DSE	2.08933	0.647148	0.0366782	0.0999405	LINC01571	8.84178	5.04536	9.42026e-19	3.04534e-18	AC013762.1	-0.0157846	-21.0939	0.987406	0.99998
CGNL1	3.25044	0.689377	0.00115227	0.0029295	C1orf137	-0.267378	-23.0944	0.789178	0.999049	INSL3	-0.133199	-22.4314	0.894036	0.999148	LINC00894	2.07169	0.46836	0.0382946	0.104156	SCGB1D4	8.81315	3.38979	1.21683e-18	3.9295e-18	GNLY	-0.0157846	-21.1145	0.987406	0.99998
LRP5L	3.24054	0.907504	0.00119302	0.00303054	LINC02288	-0.268363	-2.08019	0.78842	0.999049	AC092653.1	-0.133199	-22.4386	0.894036	0.999148	LINC01541	2.06795	0.0482263	0.0386447	0.105013	EFNA5	8.70136	1.72296	3.27927e-18	1.05669e-17	AC074091.2	-0.0157846	-21.1356	0.987406	0.99998
RUSC2	3.23794	1.03918	0.00120396	0.00305575	SOD2	-0.268835	-1.5269	0.788056	0.999049	AC106818.2	-0.133864	0.175958	0.89351	0.999148	AL139383.1	2.06194	0.72278	0.0392134	0.106462	ARHGEF26-AS1	8.65927	4.6908	4.74785e-18	1.52828e-17	AC105290.1	-0.0157846	-21.2147	0.987406	0.99998
NOSTRIN	3.20015	1.96041	0.00137354	0.00347733	ADGRV1	-0.268841	-1.55366	0.788052	0.999049	AC003991.1	-0.13416	-0.470581	0.893276	0.999148	AL078459.1	2.05924	0.869862	0.039471	0.106968	DOCK4	8.65691	3.00026	4.84729e-18	1.55861e-17	AC025539.1	-0.0157846	-21.197	0.987406	0.99998
CNTN3	3.19855	0.606685	0.00138119	0.00349374	B4GALT4-AS1	-0.268841	-1.56348	0.788052	0.999049	ATP10B	-0.134224	-0.783087	0.893225	0.999148	LRRC6	2.05226	-0.0184555	0.0401442	0.108596	TNNT3	8.58837	5.06863	8.82142e-18	2.8304e-17	IL2RA	-0.0157846	-21.0632	0.987406	0.99998
S100G	3.19677	2.19534	0.00138976	0.00351244	ALDH16A1	-0.268843	-1.55308	0.78805	0.999049	EPHB1	-0.134838	-1.76792	0.89274	0.999148	ALKAL2	2.04302	0.122272	0.0410507	0.110948	STOX2	8.54049	2.613	1.33648e-17	4.28359e-17	AL355474.1	-0.0157846	-21.185	0.987406	0.99998
LDLRAD4	3.19489	0.289624	0.00139883	0.00353239	ADH6	-0.268862	-1.73314	0.788036	0.999049	MRAP	-0.134845	-1.80245	0.892735	0.999148	TFF2	2.03015	0.7824	0.042341	0.114332	EXT1	8.53378	1.10036	1.41646e-17	4.53508e-17	AC132803.1	-0.0157846	-21.1812	0.987406	0.99998
WWOX	3.18447	0.182813	0.00145018	0.00365899	C16orf95	-0.269308	-1.18335	0.787693	0.999049	AL157886.1	-0.134851	-1.88601	0.89273	0.999148	ALPG	2.015	0.590046	0.0439046	0.118341	CD55	8.47529	1.15574	2.34493e-17	7.49978e-17	ZBTB46-AS1	-0.0157846	-21.2205	0.987406	0.99998
TAPT1-AS1	3.181	0.684838	0.00146766	0.00369689	ITPRID1	-0.269316	-1.1719	0.787687	0.999049	AC016597.2	-0.134851	-2.0058	0.89273	0.999148	ACTG1	2.01228	1.6388	0.0441903	0.119005	AQP3	8.47401	3.2966	2.37083e-17	7.57452e-17	HCAR3	-0.0157846	-21.0608	0.987406	0.99998
NTS	3.17506	2.70613	0.00149808	0.003768	AL139142.1	-0.269804	-1.07838	0.787311	0.999049	AC244517.1	-0.134851	-2.14234	0.89273	0.999148	AC016831.6	2.00274	1.09651	0.0452047	0.121409	TEX22	8.46968	2.34121	2.46061e-17	7.85302e-17	AC009163.5	-0.0157846	-21.1838	0.987406	0.99998
CHL1	3.17499	1.9849	0.00149841	0.003768	TCN1	-0.269804	-1.1387	0.787311	0.999049	AL357153.2	-0.134857	-2.12662	0.892725	0.999148	NEAT1	1.98459	1.3388	0.0471896	0.126288	LIPH	8.46656	2.74274	2.52741e-17	8.05763e-17	AC068987.2	-0.0157846	-21.1532	0.987406	0.99998
THSD7B	3.13719	1.49904	0.00170577	0.00427869	AP002884.2	-0.271548	-0.455884	0.78597	0.999049	C6	-0.13563	0.567002	0.892114	0.999148	LINC02438	1.97565	0.471684	0.048194	0.128746	ERC1	8.45136	1.03719	2.87918e-17	9.16938e-17	AC121154.1	-0.0157846	-21.1723	0.987406	0.99998
FBXL2	3.13441	0.152597	0.00172201	0.00431582	CBY2	-0.274414	-23.254	0.783766	0.999049	AC073878.1	-0.136462	-1.1012	0.891456	0.999148	EPM2A	1.97208	1.69393	0.0486001	0.1296	CHST11	8.41374	2.50187	3.9714e-17	1.26344e-16	CNR2	-0.0157846	-21.1525	0.987406	0.99998
TEX22	3.12585	0.717293	0.00177294	0.00443976	AC105001.1	-0.276344	-1.18212	0.782284	0.999049	AC132153.1	-0.136481	-1.31795	0.891441	0.999148	CLDN10-AS1	1.96211	1.11267	0.0497498	0.132431	LURAP1	8.41105	4.41298	4.06358e-17	1.29139e-16	PEX5L	-0.0157846	-21.1028	0.987406	0.99998
VWA3A	3.11113	0.0184352	0.0018637	0.00466313	LRRN1	-0.276352	-1.35612	0.782278	0.999049	AC025279.1	-0.136481	-1.10981	0.891441	0.999148	HLA-B	1.9612	1.61802	0.0498555	0.132594	PGR	8.39382	0.998916	4.70615e-17	1.49402e-16	AF107885.2	-0.0157846	-21.4915	0.987406	0.99998
LINC01725	3.10115	1.31494	0.00192773	0.00481933	AC129102.1	-0.276365	-1.3631	0.782267	0.999049	AC137770.1	-0.137341	-0.251052	0.890762	0.999148	AL050309.1	1.94272	0.277729	0.0520494	0.138307	TMEM200A	8.38376	4.81631	5.12615e-17	1.62563e-16	RHAG	-0.0157846	-21.1935	0.987406	0.99998
AL645568.1	3.07236	1.14532	0.00212372	0.00529605	AC137770.1	-0.27681	-1.05577	0.781926	0.999049	AC093152.1	-0.137434	-0.393396	0.890688	0.999148	FTX	1.93955	0.00318992	0.0524339	0.139189	SNTB1	8.37235	1.1206	5.64781e-17	1.78917e-16	AL133245.1	-0.0157846	-21.4901	0.987406	0.99998
PHLPP1	3.05756	0.740496	0.00223146	0.00556012	KBTBD12	-0.276818	-1.12917	0.78192	0.999049	AL353588.1	-0.138083	-0.695722	0.890175	0.999148	LINC01376	1.93747	0.636333	0.0526882	0.139633	PVT1	8.27631	1.6299	1.27049e-16	4.02053e-16	MB	-0.0169483	0.330172	0.986478	0.99998
LINC01004	3.04865	0.445447	0.00229869	0.00572288	AC093817.2	-0.277289	-0.908854	0.781558	0.999049	CD37	-0.138083	-0.693466	0.890175	0.999148	AC002066.1	1.93391	0.928772	0.0531247	0.140665	LINC00939	8.25348	3.75081	1.53845e-16	4.8634e-16	AL596223.1	-0.0172196	-21.3179	0.986261	0.99998
C8orf37-AS1	3.02397	0.899637	0.00249479	0.00619566	AC092142.1	-0.277704	-0.699984	0.781239	0.999049	AC068051.1	-0.138083	-0.621919	0.890175	0.999148	LTB	1.92806	1.22371	0.0538482	0.142456	LINC01480	8.21642	1.53501	2.09671e-16	6.62119e-16	COL10A1	-0.0172196	-21.2411	0.986261	0.99998
SDK1	3.02239	0.170688	0.00250788	0.00621844	LINC01708	-0.278636	-0.585961	0.780524	0.999049	ANGPT2	-0.138165	-1.05824	0.89011	0.999148	AL137800.1	1.92176	1.43951	0.0546356	0.144411	FOXN4	8.18639	5.39875	2.69181e-16	8.48261e-16	CRB2	-0.0172196	-21.1542	0.986261	0.99998
OLFM4	3.02236	2.10487	0.0025081	0.00621844	ANXA13	-0.281947	-3.05937	0.777984	0.999049	LINC02028	-0.138749	-22.365	0.889648	0.999148	ATXN7L1	1.91752	0.262076	0.0551717	0.1457	AL391840.1	8.13139	4.60159	4.24404e-16	1.336e-15	AC002069.2	-0.0172196	-21.2534	0.986261	0.99998
ADAMTS9-AS2	2.97749	1.20111	0.00290623	0.00717589	AL138701.2	-0.28195	-3.17861	0.777982	0.999049	AC013468.1	-0.138749	-22.496	0.889648	0.999148	RUSC2	1.90805	0.73156	0.0563842	0.148771	ZBTB20	8.11139	1.33501	5.00457e-16	1.57377e-15	DNAH8	-0.0172196	-21.2421	0.986261	0.99998
HERC5	2.97704	0.550259	0.00291047	0.00718043	AC093425.1	-0.282425	-1.99558	0.777618	0.999049	AL354733.2	-0.138847	0.104171	0.889571	0.999148	DERL3	1.90513	0.196193	0.0567632	0.149611	EML6	8.06553	4.72536	7.29209e-16	2.28831e-15	CXXC4-AS1	-0.0172196	-21.3049	0.986261	0.99998
LINC01376	2.94544	0.817541	0.00322492	0.00794969	AC078795.1	-0.282438	-2.12324	0.777608	0.999049	AL451007.3	-0.14039	-1.73446	0.888352	0.999148	LINC01320	1.90483	0.124202	0.0568024	0.149611	SIPA1L3	8.05548	1.43859	7.91691e-16	2.48179e-15	AC024560.3	-0.0172196	-21.1928	0.986261	0.99998
LINC00894	2.91979	0.584257	0.00350267	0.00859903	FGF21	-0.282911	-1.67767	0.777245	0.999049	AC144831.1	-0.14039	-1.9122	0.888352	0.999148	BNC2	1.90426	0.453292	0.0568761	0.149674	SSH2	8.04213	0.97799	8.82915e-16	2.76487e-15	LINC01344	-0.0172196	-21.3335	0.986261	0.99998
HMGB2	2.90369	0.363384	0.00368788	0.00903891	CXCL14	-0.282919	-1.91095	0.777239	0.999049	LINC02603	-0.140396	-1.97172	0.888347	0.999148	TSPAN12	1.89591	0.0863595	0.0579713	0.152422	TBCK	8.02864	1.12622	9.85603e-16	3.08322e-15	LINC00462	-0.0172196	-21.18	0.986261	0.99998
CSF3	2.89906	1.16124	0.00374289	0.00916626	MYRIP	-0.283372	-1.29796	0.776891	0.999049	AC104964.4	-0.140399	-2.11668	0.888345	0.999148	ARL6	1.8766	0.0131104	0.0605724	0.158844	SMURF1	8.01335	1.25831	1.11624e-15	3.48826e-15	CPNE9	-0.0172196	-21.1703	0.986261	0.99998
AC097376.3	2.8948	0.431408	0.00379401	0.00928388	AL121974.1	-0.28338	-1.34299	0.776885	0.999049	AL157834.4	-0.141309	-0.390363	0.887626	0.999148	SAA2-SAA4	1.86388	0.099298	0.0623387	0.16319	AC010754.1	7.96142	5.23481	1.7008e-15	5.30396e-15	LINC02627	-0.0172196	-21.4131	0.986261	0.99998
STARD13	2.86977	0.447562	0.00410767	0.0100269	DST-AS1	-0.283394	-1.38944	0.776875	0.999049	G2E3-AS1	-0.141312	-0.349266	0.887623	0.999148	SPRY4-AS1	1.86177	0.764635	0.0626351	0.163823	LINC00882	7.93699	2.88586	2.0715e-15	6.44659e-15	FGF1	-0.0172196	-21.4276	0.986261	0.99998
GRIA2	2.85833	3.53418	0.00425877	0.0103704	SAMD11	-0.283839	-1.11122	0.776533	0.999049	ITPRID1	-0.141312	-0.369793	0.887623	0.999148	AL354696.2	1.85938	1.13353	0.0629729	0.164563	MT-CO3	7.93545	1.09465	2.0973e-15	6.5201e-15	LARGE-AS1	-0.0172196	-21.6038	0.986261	0.99998
AL158064.1	2.79867	1.98259	0.00513142	0.0124247	AC091212.1	-0.28385	-1.20888	0.776525	0.999049	SLC8A1-AS1	-0.142009	-0.872019	0.887073	0.999148	MIR34AHG	1.83979	0.756119	0.0657997	0.171611	MIR100HG	7.91309	3.15121	2.51084e-15	7.79763e-15	FAM78B	-0.0172196	-21.1884	0.986261	0.99998
MACROD2	2.78634	0.138598	0.00533075	0.012897	AL157911.1	-0.284744	-0.708817	0.77584	0.999049	AL360268.1	-0.142009	-0.875159	0.887073	0.999148	ASTN2	1.81126	0.640917	0.0701001	0.181921	PPP1R9A	7.89267	0.966398	2.95797e-15	9.17674e-15	AC092747.1	-0.0172196	-20.9875	0.986261	0.99998
AC078845.1	2.75417	1.71819	0.00588413	0.0142129	AL356488.2	-0.284763	-0.834596	0.775826	0.999049	AC090186.1	-0.142018	-1.04649	0.887065	0.999148	NRG1	1.80549	2.17452	0.0709987	0.183776	PSD3	7.89105	1.98777	2.99662e-15	9.28705e-15	DENND5B-AS1	-0.0172196	-21.1486	0.986261	0.99998
MIR924HG	2.72877	0.468656	0.00635703	0.0153305	AC093523.2	-0.285172	-0.543836	0.775513	0.999049	SCAT2	-0.142021	-1.05583	0.887063	0.999148	NAALADL2	1.8004	0.119863	0.0717969	0.185682	GPR160	7.88169	1.70659	3.22977e-15	9.99928e-15	SIM2	-0.0172196	-21.2802	0.986261	0.99998
AL133353.2	2.7057	1.20897	0.00681608	0.0164243	AC009230.1	-0.285584	-0.519604	0.775197	0.999049	AL445248.1	-0.142024	-1.13598	0.887061	0.999148	PPP1R1C	1.77923	1.63377	0.0752022	0.19382	B2M	7.87452	0.820166	3.42051e-15	1.05789e-14	AC011139.1	-0.0172196	-21.2568	0.986261	0.99998
H1-3	2.68314	-0.112635	0.0072935	0.0175465	CEP250-AS1	-0.286023	-0.406696	0.77486	0.999049	BHMT2	-0.143647	-0.724486	0.885779	0.999148	IFIT2	1.77313	0.276221	0.0762068	0.195904	C10orf67	7.83341	5.32279	4.74817e-15	1.46699e-14	CD84	-0.0172196	-21.1818	0.986261	0.99998
ENDOG	2.64199	-0.0918186	0.00824195	0.0197333	KIF5C-AS1	-0.289472	-2.15219	0.77222	0.999049	AC024084.2	-0.143671	-0.953815	0.88576	0.999148	GREB1L	1.75702	0.71993	0.0789141	0.20269	HSP90AB1	7.78769	1.60811	6.82479e-15	2.10642e-14	LINC02319	-0.0172196	-21.1788	0.986261	0.99998
HS2ST1	2.62642	0.479701	0.00862886	0.0206432	STK31	-0.289953	-1.7488	0.771852	0.999049	AC026254.2	-0.144299	-22.439	0.885264	0.999148	PLPP3	1.75533	1.27601	0.0792033	0.203259	PARD3B	7.76261	1.18559	8.31969e-15	2.56517e-14	LINC02202	-0.0172196	-21.2964	0.986261	0.99998
ZFAT	2.62463	0.954874	0.00867426	0.0207353	MINAR1	-0.290861	-1.10725	0.771158	0.999049	AL354710.2	-0.144299	-22.3853	0.885264	0.999148	GPRC5A	1.72257	0.252631	0.0849656	0.217675	ENTPD1-AS1	7.73994	1.61975	9.94639e-15	3.05729e-14	AL157392.3	-0.017614	-0.567682	0.985947	0.99998
TNF	2.61803	0.774391	0.00884395	0.0211241	IL23R	-0.296033	-3.35163	0.767205	0.999049	RIC3	-0.144299	-22.5184	0.885264	0.999148	GPR39	1.71965	0.153925	0.0854958	0.218846	DNAH14	7.71402	1.30658	1.21918e-14	3.74365e-14	AC007391.3	-0.0186545	-21.3829	0.985117	0.99998
PCSK5	2.61396	0.314254	0.00895002	0.0213588	C4orf36	-0.296964	-1.51693	0.766494	0.999049	AC096746.1	-0.144299	-22.4858	0.885264	0.999148	RSRC1	1.65025	0.810078	0.0988916	0.251206	DLEU2	7.69993	1.35539	1.36144e-14	4.17621e-14	AL136164.2	-0.0186545	-21.3282	0.985117	0.99998
MAP3K14	2.61371	0.868742	0.00895646	0.0213588	PPP2R2C	-0.296967	-1.56931	0.766492	0.999049	AP001831.1	-0.144299	-22.5937	0.885264	0.999148	PLAU	1.62444	0.514304	0.104281	0.26445	LINC01732	7.69856	5.80981	1.37609e-14	4.21682e-14	TMPRSS12	-0.0186545	-21.3894	0.985117	0.99998
EPCAM-DT	2.60882	1.06008	0.00908552	0.0216494	AL451007.2	-0.296983	-1.80673	0.766479	0.999049	MUC12	-0.144598	0.588979	0.885028	0.999148	SOX6	1.62144	0.180616	0.104924	0.265855	UNC79	7.68814	2.75216	1.49286e-14	4.56997e-14	AC005899.6	-0.0186545	-21.5006	0.985117	0.99998
OSCP1	2.59154	-0.0979707	0.00955464	0.0226951	MED12L	-0.297463	-1.36358	0.766113	0.999049	KIF5C-AS1	-0.145217	-0.303184	0.884539	0.999148	NCALD	1.6205	0.0782853	0.105125	0.266139	PDE4D	7.6769	1.26986	1.62979e-14	4.98406e-14	TCF4-AS1	-0.0186545	-21.2374	0.985117	0.99998
RAPGEF5	2.58774	0.34895	0.00966085	0.0229292	AC107959.2	-0.297885	-1.04607	0.765791	0.999049	TPTE2	-0.145251	-0.562534	0.884513	0.999148	IQCD	1.61772	-0.0901167	0.105723	0.267428	ABCA13	7.67567	3.27208	1.64562e-14	5.02734e-14	AL391839.1	-0.0186545	-21.4194	0.985117	0.99998
NOS1	2.57803	0.918663	0.00993656	0.023565	MMP10	-0.298376	-1.14476	0.765416	0.999049	AL356277.3	-0.147574	-1.20251	0.882679	0.999148	TMTC2	1.60648	0.0421634	0.108168	0.272921	TIAM2	7.67061	1.67789	1.71181e-14	5.22423e-14	TMEM204	-0.0186545	-21.4579	0.985117	0.99998
CEP112	2.56613	0.0228341	0.0102842	0.0243508	AC087280.2	-0.298716	0.302432	0.765157	0.999049	FP671120.5	-0.148367	-0.165606	0.882053	0.999148	ABLIM3	1.58907	0.738471	0.112044	0.282463	UBE3D	7.6596	2.09125	1.86509e-14	5.68626e-14	AL645929.2	-0.0186545	-21.3158	0.985117	0.99998
RABL2A	2.56151	-0.0312319	0.0104217	0.0246571	AL357052.1	-0.299234	-0.638273	0.764762	0.999049	ANXA13	-0.149165	-0.614153	0.881424	0.999148	ZBTB20	1.57628	-0.0311774	0.114961	0.2895	MT1E	7.6285	0.948589	2.37492e-14	7.22593e-14	LINC02631	-0.0186545	-21.3203	0.985117	0.99998
SPNS2	2.55247	0.270784	0.0106962	0.0252866	AC011405.1	-0.300486	-0.360151	0.763807	0.999049	LINC00923	-0.149201	-0.904167	0.881395	0.999148	CPEB3	1.57557	0.565509	0.115126	0.289504	CCDC184	7.60473	5.20192	2.85499e-14	8.67779e-14	AL359704.3	-0.0186545	-21.3424	0.985117	0.99998
ZNF169	2.54951	1.13523	0.0107874	0.0254819	AL365356.1	-0.301741	-0.152194	0.76285	0.999049	MUC20	-0.149849	-22.6524	0.880883	0.999148	SPINK5	1.57507	0.21624	0.11524	0.289547	CDK14	7.52703	1.14495	5.19067e-14	1.57134e-13	AL592528.1	-0.0186545	-21.2106	0.985117	0.99998
TNIK	2.53133	0.582809	0.0113629	0.0267993	AL021997.3	-0.303046	-2.95411	0.761854	0.999049	RHBDL3	-0.149849	-22.517	0.880883	0.999148	TYW1B	1.57465	0.904575	0.115337	0.289548	MROH9	7.52233	5.29147	5.38091e-14	1.62729e-13	AC082651.1	-0.0186545	-21.4272	0.985117	0.99998
KIAA1328	2.52007	0.417852	0.0117331	0.0275858	PIWIL2	-0.303049	-3.13577	0.761852	0.999049	CASS4	-0.149849	-22.5574	0.880883	0.999148	C8orf37-AS1	1.56453	0.527543	0.117692	0.295214	RFX7	7.50673	1.04613	6.06233e-14	1.83152e-13	SLC30A10	-0.0186545	-21.4747	0.985117	0.99998
NOS1AP	2.5167	0.485886	0.011846	0.0278076	AL109741.1	-0.30306	-3.32611	0.761844	0.999049	FAM209A	-0.149849	-22.4558	0.880883	0.999148	RAB15	1.56026	2.03812	0.118699	0.29749	PTPN14	7.5024	0.984658	6.26601e-14	1.89115e-13	AL157834.1	-0.0186545	-21.2951	0.985117	0.99998
BNC2	2.5106	0.470979	0.0120524	0.02827	AP001025.1	-0.303542	-2.2872	0.761477	0.999049	DPF1	-0.150917	0.510334	0.880041	0.999148	2024-12-01	1.55964	1.13811	0.118845	0.297609	LINC00894	7.49461	2.12163	6.64977e-14	2.00294e-13	GK-AS1	-0.0186545	-21.4773	0.985117	0.99998
ADGRL4	2.49425	0.864635	0.0126223	0.0295605	IMPG1	-0.305833	-0.759055	0.759732	0.999049	TNXB	-0.151487	-1.97364	0.879592	0.999148	OSBP2	1.55069	0.863741	0.120976	0.302446	PPP1R12B	7.41388	1.66253	1.22658e-13	3.69082e-13	AC008632.1	-0.0186545	-21.2657	0.985117	0.99998
MIR34AHG	2.48104	0.766676	0.0131001	0.0306555	AC005162.2	-0.306672	-0.545015	0.759093	0.999049	AP005264.1	-0.151487	-2.09437	0.879592	0.999148	HELLPAR	1.55068	3.17428	0.120978	0.302446	LINC02320	7.39784	3.24977	1.38414e-13	4.16074e-13	AL589693.1	-0.0186545	-21.3396	0.985117	0.99998
ODF3B	2.45479	-0.117671	0.0140966	0.0329361	AC103796.1	-0.307095	-0.450241	0.758771	0.999049	CLN6	-0.15149	-2.06587	0.879589	0.999148	SLC6A6	1.54844	-0.0293319	0.121515	0.303536	WDR17	7.39132	5.27637	1.45374e-13	4.36558e-13	CNOT10-AS1	-0.0186545	-21.2716	0.985117	0.99998
H1-4	2.44204	-0.144994	0.0146046	0.0340963	AP002336.2	-0.307601	0.326125	0.758386	0.999049	AC091946.1	-0.151493	-2.19252	0.879587	0.999148	RSAD2	1.5454	0.516374	0.122248	0.305112	ACACB	7.37901	2.62545	1.59471e-13	4.78412e-13	IL10RA	-0.0186545	-21.3212	0.985117	0.99998
WDR7	2.38483	0.325782	0.017087	0.0398297	TEX26	-0.309596	-23.5069	0.756868	0.999049	AL357075.4	-0.151496	-2.06636	0.879584	0.999148	C1QTNF7-AS1	1.538	1.09203	0.124049	0.309268	BUB1	7.36697	1.2203	1.74544e-13	5.23108e-13	AC010967.1	-0.0186545	-21.2966	0.985117	0.99998
CLEC4E	2.38425	2.48633	0.0171141	0.0398621	AP003059.2	-0.310565	-2.23099	0.756132	0.999049	KCNIP2-AS1	-0.153109	-1.19388	0.878312	0.999148	RAB42	1.53115	0.700343	0.125733	0.313028	GCNT2	7.3613	1.09342	1.82123e-13	5.45277e-13	XYLT1	-0.0186545	-21.3664	0.985117	0.99998
LINC02331	2.36943	1.54119	0.0178155	0.0414587	LRP1B	-0.31104	-1.83215	0.755771	0.999049	SPDYE2B	-0.153115	-1.21961	0.878307	0.999148	AC092171.3	1.52086	1.46883	0.128295	0.318878	SLIT2	7.34245	1.88628	2.09712e-13	6.27255e-13	FBXW12	-0.0186545	-21.5017	0.985117	0.99998
CNTNAP3B	2.36919	1.14822	0.0178272	0.0414587	KPNA7	-0.311517	-1.4549	0.755407	0.999049	PCP4L1	-0.153131	-1.51126	0.878295	0.999148	AC105285.1	1.51843	1.25769	0.128907	0.320133	UBE2C	7.25588	0.987509	3.99064e-13	1.19242e-12	LINC01322	-0.0186545	-21.2559	0.985117	0.99998
LINC01505	2.35474	0.829031	0.0185359	0.0430733	AP000943.2	-0.312412	-0.943612	0.754728	0.999049	AC128687.3	-0.153134	-1.34067	0.878293	0.999148	RPL11	1.51176	1.14061	0.130595	0.323789	CLDN9	7.25339	3.8404	4.06478e-13	1.21337e-12	PPP1R14C	-0.018763	-0.224528	0.98503	0.99998
AL353138.1	2.32441	1.45295	0.0201034	0.0466797	LINC00299	-0.31286	-0.896563	0.754387	0.999049	LINC02742	-0.153146	-1.49087	0.878283	0.999148	CCSER1	1.50916	0.087715	0.131257	0.325162	IER2	7.21529	1.00651	5.38191e-13	1.60494e-12	AC015660.2	-0.018832	-0.55521	0.984975	0.99998
KIF9-AS1	2.28942	0.541342	0.022055	0.0511322	AL078644.2	-0.31286	-0.846765	0.754387	0.999049	CLEC19A	-0.154765	-1.07518	0.877007	0.999148	CXCL10	1.493	1.00984	0.135436	0.334961	PGK1	7.20079	1.88651	5.98665e-13	1.78351e-12	AC113143.3	-0.0200895	-21.3568	0.983972	0.99998
TMEM100	2.28661	3.66428	0.0222188	0.0514324	CRB1	-0.312882	-0.887778	0.754371	0.999049	CMTM2	-0.155399	-22.5758	0.876507	0.999148	KIAA0556	1.48971	0.0138212	0.136301	0.33655	VNN1	7.16474	2.6656	7.79333e-13	2.31944e-12	BX284613.2	-0.0200895	-21.4536	0.983972	0.99998
HHAT	2.28429	0.557104	0.0223542	0.0517059	AC099489.1	-0.31455	-0.472206	0.753103	0.999049	BRWD1-AS1	-0.155399	-22.5298	0.876507	0.999148	STEAP2-AS1	1.48948	1.37107	0.136361	0.33655	H2AX	7.15356	0.773824	8.45577e-13	2.5141e-12	AC111170.2	-0.0200895	-21.4774	0.983972	0.99998
ATF3	2.27895	-0.00467153	0.0226699	0.0523957	AL136531.2	-0.315453	-0.4255	0.752418	0.999049	VEGFD	-0.155399	-22.599	0.876507	0.999148	TNIP3	1.48088	0.439889	0.138639	0.341196	KCND2	7.14981	3.9174	8.68981e-13	2.58113e-12	INKA2-AS1	-0.0200895	-21.3034	0.983972	0.99998
RORA	2.26672	0.421087	0.0234072	0.0540583	AC080005.1	-0.317119	-3.24075	0.751153	0.999049	AL109761.1	-0.155399	-22.5799	0.876507	0.999148	TCF7L1	1.47969	0.49949	0.138957	0.341698	KIF11	7.08963	0.979337	1.34474e-12	3.99034e-12	PRSS56	-0.0200895	-21.4088	0.983972	0.99998
AL590652.1	2.26345	0.893812	0.0236081	0.0544801	MRPS9-AS2	-0.318072	-1.7968	0.75043	0.999049	AC127024.2	-0.155399	-22.8134	0.876507	0.999148	FOXJ1	1.47801	-0.0973388	0.139406	0.342521	TNIK	7.05255	2.20139	1.75669e-12	5.20244e-12	AL133259.1	-0.0200895	-21.5034	0.983972	0.99998
CDH6	2.25845	2.38422	0.0239178	0.0551525	STAT4	-0.318077	-1.77281	0.750426	0.999049	AP003059.1	-0.155495	-0.199079	0.876431	0.999148	COL25A1	1.4734	0.505818	0.140643	0.345278	FGF12	7.01519	2.35386	2.29638e-12	6.79402e-12	AL078602.1	-0.0200895	-21.4773	0.983972	0.99998
IFT81	2.25213	-0.0688162	0.0243142	0.0560235	CACNB2	-0.318543	-1.5089	0.750073	0.999049	AC124312.5	-0.155529	-0.248645	0.876404	0.999148	MAP2	1.47227	0.830419	0.140948	0.345461	NHSL1	6.98652	0.903798	2.81784e-12	8.3122e-12	EFCAB8	-0.0200895	-21.4359	0.983972	0.99998
CYP3A5	2.23621	1.29667	0.0253382	0.0582934	PTPN20	-0.318982	-1.12753	0.74974	0.999049	AP001025.1	-0.156305	-0.3809	0.875793	0.999148	EDA	1.46031	0.320372	0.144204	0.352864	AC097376.3	6.96858	1.73394	3.20157e-12	9.43487e-12	GRM5	-0.0200895	-21.5399	0.983972	0.99998
ZNF235	2.2353	0.778275	0.025398	0.0583861	AC021236.1	-0.319001	-1.15297	0.749726	0.999049	AL078582.2	-0.157032	-2.01639	0.875219	0.999148	SHANK2	1.45511	-0.0551675	0.145639	0.356085	AC092944.1	6.94568	2.69251	3.76637e-12	1.10884e-11	LINC01433	-0.0200895	-21.4715	0.983972	0.99998
SAA2-SAA4	2.22669	0.0482635	0.0259681	0.0596511	NEGR1	-0.319006	-1.25377	0.749722	0.999049	PNPLA5	-0.157032	-1.91668	0.875219	0.999148	AC007389.1	1.44859	1.00826	0.147451	0.360217	TSC22D1	6.93078	1.51037	4.18526e-12	1.22975e-11	IGLC2	-0.0200895	-21.3984	0.983972	0.99998
ZFPM2	2.22209	0.963274	0.0262769	0.0602682	SLC8A1	-0.319429	-0.950223	0.749401	0.999049	ACSL3-AS1	-0.157038	-2.06466	0.875215	0.999148	AC093827.5	1.44817	0.955315	0.147569	0.360217	TNFAIP8L3	6.9047	5.2515	5.03085e-12	1.47677e-11	LINC02801	-0.0200895	-21.2686	0.983972	0.99998
LINC01473	2.21592	0.256185	0.026697	0.0611849	RBFOX1	-0.31944	-1.02701	0.749393	0.999049	LINC00390	-0.157038	-2.01668	0.875215	0.999148	PI3	1.44008	-0.102728	0.149846	0.365181	AC246817.1	6.88975	4.13581	5.58923e-12	1.63907e-11	GLIS1	-0.0200895	-21.4132	0.983972	0.99998
RSRC1	2.20635	0.930165	0.0273595	0.0626553	AC109927.1	-0.320305	-0.709836	0.748737	0.999049	SPATA45	-0.157038	-2.0265	0.875215	0.999148	PRKCE	1.4333	0.389017	0.151773	0.369276	AC122719.3	6.8863	5.60649	5.7264e-12	1.67766e-11	MC1R	-0.0200895	-21.375	0.983972	0.99998
LINC01515	2.19348	0.304669	0.0282731	0.0646983	AL157829.1	-0.32084	-0.854931	0.748332	0.999049	LINC02462	-0.157038	-2.10439	0.875215	0.999148	EREG	1.43016	1.15378	0.15267	0.370859	HERC5	6.88353	1.7222	5.83863e-12	1.70887e-11	NHS-AS1	-0.0200895	-21.4877	0.983972	0.99998
ADGRL3	2.18469	0.863925	0.0289115	0.0659577	LINC01353	-0.324167	-3.44846	0.745811	0.999049	AC007743.1	-0.157041	-2.13033	0.875212	0.999148	KLHL29	1.42852	0.342039	0.153142	0.371703	NRXN3	6.87084	1.17535	6.38229e-12	1.86435e-11	AC084864.2	-0.0200895	-21.3533	0.983972	0.99998
SHROOM4	2.16188	0.79346	0.0306272	0.0698188	CLCA4	-0.324175	-3.7424	0.745805	0.999049	AL357052.1	-0.157147	-0.165589	0.875129	0.999148	AC093249.2	1.42803	1.99692	0.153285	0.371749	ATXN7L1	6.86282	1.46181	6.75143e-12	1.97026e-11	MIR155HG	-0.0200895	-21.4004	0.983972	0.99998
CC2D2A	2.15724	-0.143921	0.0309866	0.0705845	TMEM170A	-0.324626	-2.22304	0.745464	0.999049	AL135978.2	-0.157955	-0.467075	0.874492	0.999148	STX18-AS1	1.41966	0.555961	0.155707	0.377013	TET3	6.84932	1.51254	7.42026e-12	2.16334e-11	AC015687.1	-0.0200895	-21.3598	0.983972	0.99998
GRID2	2.14011	1.61002	0.0323455	0.0736241	LINC02240	-0.324642	-2.41468	0.745452	0.999049	COL5A2	-0.158586	0.0800464	0.873995	0.999148	CRTC3-AS1	1.41627	0.948339	0.156697	0.379105	DLGAP5	6.81931	1.23507	9.14759e-12	2.66176e-11	SMTNL1	-0.0200895	-21.3461	0.983972	0.99998
LTB	2.13838	1.17616	0.0324859	0.0738876	AC005920.2	-0.325107	-1.76352	0.7451	0.999049	AL356317.2	-0.158671	-1.35932	0.873928	0.999148	RFX3	1.4123	-0.110193	0.157863	0.381312	CXCL6	6.81733	1.76503	9.27495e-12	2.69621e-11	CPLX2	-0.0200895	-21.5003	0.983972	0.99998
LARGE1	2.1048	0.276947	0.0353088	0.0802473	AC027808.1	-0.325503	0.0748693	0.7448	0.999049	EYA1	-0.160102	0.0477151	0.872801	0.999148	COL1A2	1.40645	0.162866	0.15959	0.385172	ITGAL	6.81095	5.22729	9.69572e-12	2.8158e-11	ISM1	-0.0201141	-0.997103	0.983952	0.99998
TAFA2	2.09091	1.03303	0.0365363	0.0829115	SLFNL1	-0.325555	-1.42201	0.744761	0.999049	AC138356.3	-0.160169	-0.0326843	0.872748	0.999148	FAM110B	1.40122	1.12781	0.161147	0.388619	RAD51B	6.80865	1.39883	9.85166e-12	2.85832e-11	AC026347.2	-0.0202818	-0.570354	0.983819	0.99998
AC093722.1	2.07344	1.79502	0.0381311	0.0863998	LINC02432	-0.325563	-1.48773	0.744755	0.999049	AC130324.2	-0.160313	-1.02336	0.872634	0.999148	UST	1.38951	0.416883	0.164677	0.396175	PGF	6.79634	4.86271	1.07307e-11	3.11036e-11	AC011405.1	-0.0210116	-0.297016	0.983236	0.99998
PGR-AS1	2.06282	1.31774	0.0391297	0.0885956	AC090921.1	-0.325601	-1.66237	0.744727	0.999049	AC007098.1	-0.160949	-22.565	0.872133	0.999148	C2orf88	1.38763	1.89274	0.16525	0.397055	NAALADL2	6.73677	1.30324	1.61945e-11	4.68502e-11	SPDYE3	-0.0210215	-0.0724052	0.983229	0.99998
PTPRR	2.05446	2.38085	0.0399311	0.0903418	NTNG1	-0.326447	-0.923751	0.744086	0.999049	AL451137.2	-0.160949	-22.7936	0.872133	0.999148	AL139260.1	1.37225	0.524451	0.169985	0.406986	DEPDC1	6.6937	1.26169	2.1759e-11	6.28873e-11	AKR1B10	-0.0211595	-0.457973	0.983118	0.99998
FGF12	2.04569	0.546306	0.0407865	0.0920688	Z83844.1	-0.326447	-0.963922	0.744086	0.999049	AC009060.1	-0.160949	-22.5684	0.872133	0.999148	LINC02331	1.36817	0.975669	0.17126	0.409712	FOS	6.66984	0.879575	2.56088e-11	7.39427e-11	CDH6	-0.0215047	-0.103008	0.982843	0.99998
PAK3	2.03915	1.6673	0.041435	0.0933922	TP63	-0.326495	-1.16186	0.74405	0.999049	AC027018.1	-0.160949	-22.707	0.872133	0.999148	AKT3	1.35846	1.87114	0.174319	0.416036	S100P	6.65681	1.25259	2.79839e-11	8.07228e-11	LINC02398	-0.0215244	-21.6972	0.982827	0.99998
ANKRD36	2.0383	0.261993	0.0415204	0.0935143	AC009495.1	-0.329358	-0.255208	0.741885	0.999049	AL627309.1	-0.160949	-22.7111	0.872133	0.999148	SCEL	1.34934	-0.0270739	0.177227	0.422641	VPS8	6.64984	1.06904	2.93417e-11	8.45583e-11	BIRC6-AS1	-0.0215244	-21.3735	0.982827	0.99998
LINC02438	2.0197	0.277386	0.043415	0.0976349	CEACAM6	-0.329609	-0.893958	0.741695	0.999049	AP003059.2	-0.161858	-0.596851	0.871418	0.999148	TAFA2	1.34392	0.754409	0.178974	0.426129	AC105916.2	6.62993	4.40471	3.35849e-11	9.66935e-11	WEE2	-0.0215244	-21.4851	0.982827	0.99998
TTC21B	2.01284	-0.0257399	0.0441317	0.0991725	CWH43	-0.331665	-2.38818	0.740142	0.999049	INKA1	-0.161867	-0.679767	0.87141	0.999148	CCDC30	1.34203	-0.068777	0.179585	0.427245	PRKCA	6.58784	2.05422	4.46257e-11	1.28358e-10	AC025211.1	-0.0215244	-21.4469	0.982827	0.99998
TTLL11	2.0053	0.722108	0.0449312	0.100743	CNN1	-0.331665	-2.32533	0.740142	0.999049	SLC28A1	-0.161879	-0.633411	0.871401	0.999148	MIR99AHG	1.32312	0.152543	0.185797	0.441322	VPS13B	6.58197	1.05812	4.64239e-11	1.33402e-10	AC009269.2	-0.0215244	-21.7353	0.982827	0.99998
SPRY4-AS1	1.98771	0.6498	0.0468439	0.104874	AL109955.2	-0.331681	-2.52305	0.74013	0.999049	KLHL6	-0.16232	0.568037	0.871054	0.999148	ANKRD44	1.31853	1.17265	0.187328	0.444607	AC020911.2	6.57563	4.69219	4.8448e-11	1.39085e-10	LINC02506	-0.0215244	-21.5071	0.982827	0.99998
DISC1	1.98164	1.04255	0.0475198	0.106229	AL355802.3	-0.332136	-1.77575	0.739786	0.999049	ELMOD1	-0.162538	-0.0160526	0.870882	0.999148	SCG5	1.31578	1.26371	0.188247	0.446149	ALDH3A1	6.5683	1.62155	5.08918e-11	1.45961e-10	AC018690.1	-0.0215244	-21.4543	0.982827	0.99998
CFAP70	1.96257	-0.126984	0.0496959	0.110928	LINC02343	-0.332602	-1.54802	0.739435	0.999049	LINC00589	-0.162562	-0.106922	0.870863	0.999148	CARNMT1-AS1	1.30387	1.38965	0.192277	0.454198	LINC02832	6.5641	4.97743	5.23463e-11	1.49989e-10	DIO2	-0.0215244	-21.6395	0.982827	0.99998
KSR1	1.95814	0.798317	0.0502138	0.111835	AC011477.3	-0.333475	-0.994806	0.738776	0.999049	AC020663.5	-0.162581	-1.9402	0.870849	0.999148	ACTR3C	1.29253	0.316594	0.196175	0.462314	FTX	6.51588	0.820736	7.22657e-11	2.06868e-10	AC084757.4	-0.0215244	-21.4361	0.982827	0.99998
AC005062.1	1.94391	0.761095	0.0519059	0.115517	CHRM3	-0.33352	-1.13155	0.738741	0.999049	KCNK9	-0.162581	-1.83179	0.870849	0.999148	LNC-LBCS	1.29124	-0.0507159	0.196621	0.463001	STARD13	6.50028	1.75443	8.0172e-11	2.29281e-10	EPN2-AS1	-0.0215244	-21.517	0.982827	0.99998
CCNA1	1.90148	-0.107155	0.057239	0.126728	AC073842.2	-0.33392	-0.816664	0.73844	0.999049	AC138969.1	-0.162587	-2.04306	0.870844	0.999148	AC091551.1	1.28155	0.917043	0.200002	0.470152	DSCAML1	6.49737	4.61758	8.1739e-11	2.3354e-10	EMILIN3	-0.0215244	-21.5052	0.982827	0.99998
CXCL10	1.85899	1.17494	0.0630279	0.139237	SLC9C2	-0.33413	0.204347	0.738281	0.999049	AC027250.2	-0.162587	-2.22002	0.870844	0.999148	AL137009.2	1.28119	0.889507	0.200128	0.470152	NFAT5	6.44425	0.722368	1.16173e-10	3.31293e-10	AC004471.1	-0.0215244	-21.4215	0.982827	0.99998
ZRANB2-AS2	1.84832	0.692051	0.0645558	0.142402	BTLA	-0.33653	-0.396598	0.736472	0.999049	AL691447.2	-0.16259	-2.1439	0.870841	0.999148	AL138885.3	1.27719	1.67945	0.201536	0.472719	ENO1	6.43481	1.47962	1.23625e-10	3.52207e-10	ANXA10	-0.0215244	-21.6	0.982827	0.99998
FOXJ1	1.83677	-0.155089	0.0662435	0.145911	AP003174.1	-0.338696	-2.17532	0.734839	0.999049	C17orf77	-0.164209	-1.30146	0.869566	0.999148	IL1RN	1.27658	0.426923	0.201752	0.472856	TBC1D5	6.41076	0.730291	1.44793e-10	4.12124e-10	ST8SIA6-AS1	-0.0215244	-21.4384	0.982827	0.99998
ZNF385D	1.81961	2.09805	0.0688185	0.151249	LINC01754	-0.338702	-2.24867	0.734835	0.999049	AL158198.1	-0.164227	-1.43911	0.869552	0.999148	THRB	1.26972	0.279949	0.204183	0.47818	ERRFI1	6.40856	1.15453	1.46904e-10	4.17735e-10	ADAMTSL1	-0.0215244	-21.6079	0.982827	0.99998
PSD3	1.79452	0.163702	0.0727307	0.159614	DOK6	-0.339163	-1.82112	0.734487	0.999049	CDHR4	-0.165636	0.41715	0.868443	0.999148	MTMR7	1.2607	1.36641	0.207416	0.484995	RNF103-CHMP3	6.31747	4.22577	2.65885e-10	7.55355e-10	GAS1RR	-0.0215244	-21.563	0.982827	0.99998
AC010997.3	1.78828	0.754574	0.0737313	0.161692	AC011472.1	-0.339615	-1.28376	0.734147	0.999049	TREM1	-0.165784	0.50237	0.868327	0.999148	TRIM16	1.25982	0.413095	0.207733	0.485358	SLC47A2	6.3098	4.77867	2.79405e-10	7.93012e-10	LINC02127	-0.0215244	-21.404	0.982827	0.99998
SCART1	1.78475	1.15199	0.0743023	0.162825	AC006547.2	-0.341051	-0.931166	0.733066	0.999049	AC007619.1	-0.165847	-0.954338	0.868278	0.999148	AL590652.1	1.25546	0.551812	0.209311	0.488663	ARHGEF3	6.3001	0.886701	2.97459e-10	8.43457e-10	AL159169.2	-0.0215244	-21.5345	0.982827	0.99998
KRT13	1.78369	1.021	0.0744735	0.163081	AC093019.2	-0.342669	-0.575349	0.731848	0.999049	LINC01705	-0.166499	-22.9385	0.867764	0.999148	AC098484.4	1.24319	1.2897	0.213797	0.498362	CLASP1	6.28076	0.963487	3.36914e-10	9.5443e-10	AC097500.1	-0.0215244	-21.5865	0.982827	0.99998
CHST11	1.76934	0.301853	0.0768368	0.168011	ZNRF2	-0.343788	0.199922	0.731006	0.999049	C6orf47-AS1	-0.166499	-22.6951	0.867764	0.999148	CHST11	1.23813	0.278681	0.215667	0.50233	PCNX2	6.27706	1.2269	3.45037e-10	9.76521e-10	INE2	-0.0215244	-21.5253	0.982827	0.99998
G0S2	1.72124	0.378413	0.085208	0.185369	MIR548A1HG	-0.345727	-2.21814	0.729548	0.999049	AC005154.4	-0.166499	-22.6901	0.867764	0.999148	NDP	1.23206	0.0364662	0.217927	0.506808	AL356310.1	6.26368	5.49459	3.75993e-10	1.06313e-09	AL645465.1	-0.0215343	-0.967116	0.982819	0.99998
CALN1	1.71631	0.644512	0.0861058	0.187187	AC053503.1	-0.345729	-2.39094	0.729547	0.999049	WFDC10B	-0.167426	-0.635209	0.867035	0.999148	ZNF169	1.2218	0.66717	0.221783	0.514976	LINC01572	6.25871	2.57482	3.8817e-10	1.09653e-09	AC009226.1	-0.0219978	0.29721	0.98245	0.99998
PLPP3	1.71516	1.15056	0.0863165	0.187509	SPOCK2	-0.346206	-1.88844	0.729188	0.999049	AC008056.1	-0.167442	-0.650062	0.867023	0.999148	SLC35D2	1.21356	0.493706	0.224917	0.521445	TMTC2	6.24945	1.06133	4.11911e-10	1.1625e-09	LINC00637	-0.0222444	0.164903	0.982253	0.99998
RUNX2	1.71239	0.604681	0.0868245	0.188476	CXCL11	-0.34622	-2.08188	0.729178	0.999049	HECW1	-0.167454	-0.719601	0.867013	0.999148	PGR-AS1	1.21003	0.88436	0.226267	0.523767	AL365295.1	6.2415	3.50809	4.33405e-10	1.22201e-09	AC104123.1	-0.0223726	-0.0440227	0.982151	0.99998
RFX3	1.70752	-0.185583	0.0877248	0.190292	VSTM5	-0.347982	-0.949016	0.727854	0.999049	NFASC	-0.168082	-0.0188635	0.866519	0.999148	CNTNAP3B	1.20621	0.657577	0.227736	0.526761	AL078459.1	6.19582	2.50008	5.79826e-10	1.62872e-09	SLC38A8	-0.0229594	-21.5722	0.981683	0.99998
PIP5K1B	1.6581	0.723453	0.0972973	0.210297	ADAMTS7	-0.348386	-0.690825	0.72755	0.999049	DOCK10	-0.168132	-2.01348	0.866479	0.999148	AL079338.1	1.20011	0.321717	0.230095	0.531332	TSPAN12	6.18508	0.740791	6.20724e-10	1.74198e-09	AC011473.1	-0.0229594	-21.7001	0.981683	0.99998
UBAP1L	1.65407	1.21651	0.0981134	0.211908	AC008691.1	-0.349656	-0.479123	0.726597	0.999049	FGF12-AS3	-0.168135	-2.11272	0.866477	0.999148	AC007422.1	1.19973	0.476392	0.230244	0.531332	DDIT4	6.1669	0.975404	6.96418e-10	1.95257e-09	LINC02779	-0.0229594	-21.5104	0.981683	0.99998
PERP	1.64468	1.50158	0.100036	0.215906	AC107072.2	-0.35001	-0.351788	0.726331	0.999049	SLC13A4	-0.168649	0.128139	0.866073	0.999148	GAN	1.19716	0.560124	0.231244	0.53282	RGS6	6.13549	1.76816	8.4899e-10	2.37812e-09	ENHO	-0.0229594	-21.6216	0.981683	0.99998
WDR78	1.63664	-0.19097	0.101706	0.219352	NTF3	-0.352766	-2.42778	0.724264	0.999049	AL355802.3	-0.168988	-0.355356	0.865806	0.999148	NRIP3	1.19602	2.49706	0.231688	0.533433	PIP	6.12049	4.9595	9.32858e-10	2.61061e-09	ADTRP	-0.0229594	-21.4699	0.981683	0.99998
AL137009.2	1.61576	0.895698	0.106146	0.228762	LAX1	-0.353233	-1.85559	0.723914	0.999049	KBTBD12	-0.169006	-0.489548	0.865792	0.999148	TENM3	1.18806	0.972787	0.234808	0.540203	MICU3	6.1171	1.75535	9.52923e-10	2.66428e-09	DIRC3	-0.0229594	-21.6449	0.981683	0.99998
TMEM241	1.61202	0.660585	0.106957	0.230346	AC013472.1	-0.353708	-1.58567	0.723557	0.999049	PDE3B	-0.16975	-1.23713	0.865207	0.999148	KIAA0825	1.18332	-0.0224609	0.236682	0.543679	AADACL2-AS1	6.11277	4.17567	9.79189e-10	2.73516e-09	LINC02698	-0.0229594	-21.6677	0.981683	0.99998
SFRP2	1.60642	1.86981	0.108181	0.232648	ADAM22	-0.354138	-1.20652	0.723235	0.999049	AC009318.3	-0.169774	-1.58358	0.865188	0.999148	SAA1	1.16386	0.790891	0.24448	0.560305	ARHGAP29	6.08032	0.823686	1.19943e-09	3.34415e-09	AC007610.3	-0.0229594	-21.6006	0.981683	0.99998
AC009690.1	1.59085	0.924695	0.111642	0.239919	SLC25A21	-0.354573	-0.951214	0.722909	0.999049	AC011287.1	-0.169774	-1.54919	0.865188	0.999148	LINC01170	1.16222	0.332114	0.245144	0.561399	HHAT	6.05361	2.05836	1.41636e-09	3.93799e-09	AC008273.1	-0.0229594	-21.5734	0.981683	0.99998
AC016831.6	1.5842	0.688182	0.113148	0.24246	AP000676.5	-0.35667	-0.563976	0.721339	0.999049	AC078795.1	-0.171346	-0.703745	0.863951	0.999148	MSI1	1.15964	1.3429	0.246197	0.563379	C1QTNF3-AMACR	6.04756	2.47204	1.47059e-09	4.08496e-09	AC016526.2	-0.0229594	-21.5632	0.981683	0.99998
ERICH2	1.57837	-0.0928739	0.114481	0.244966	ZNF559-ZNF177	-0.357036	-0.451969	0.721065	0.999049	AL356311.1	-0.171352	-0.774236	0.863947	0.999148	FGFBP1	1.15733	0.253971	0.247136	0.565098	TRPS1	6.03637	0.746758	1.5762e-09	4.37428e-09	AP002961.1	-0.0229594	-21.8719	0.981683	0.99998
GARNL3	1.56414	1.38784	0.117785	0.251677	SPDYE1	-0.357425	-0.378527	0.720773	0.999049	AC104211.1	-0.171392	-1.03048	0.863915	0.999148	CSTF3-DT	1.15323	2.29674	0.248817	0.568507	TPX2	6.03277	0.708751	1.61168e-09	4.46861e-09	AC060765.2	-0.0229594	-21.669	0.981683	0.99998
AL137800.1	1.53821	1.0242	0.123997	0.263974	AC022463.1	-0.359818	-2.69091	0.718983	0.999049	PTP4A1	-0.171413	-1.11389	0.863899	0.999148	NLRP1	1.1421	1.84887	0.253414	0.57813	HMGCR	5.99099	0.888593	2.08568e-09	5.7775e-09	EGLN3-AS1	-0.0229594	-21.684	0.981683	0.99998
AC007681.1	1.53792	1.42864	0.124068	0.263974	M1AP	-0.360737	-1.69867	0.718296	0.999049	AL135924.2	-0.172049	-22.6819	0.863399	0.999148	UNC79	1.13118	0.359121	0.257979	0.587652	PCCA	5.98291	0.661245	2.19187e-09	6.06606e-09	AL929236.1	-0.0229594	-21.4741	0.981683	0.99998
TXN	1.51528	2.42368	0.129702	0.275766	LINC02026	-0.361184	-1.39972	0.717962	0.999049	NT5DC4	-0.172049	-22.646	0.863399	0.999148	AL158064.1	1.12626	0.842038	0.260055	0.591932	AF241726.2	5.94733	2.21321	2.72551e-09	7.52904e-09	AC011477.8	-0.0229594	-21.5982	0.981683	0.99998
PCAT1	1.50706	0.117898	0.131795	0.279819	AL132712.1	-0.36161	-1.11695	0.717644	0.999049	PAK5	-0.172049	-22.7472	0.863399	0.999148	IL33	1.11768	0.0446272	0.263704	0.599783	KIAA1328	5.9011	1.61948	3.61093e-09	9.9566e-09	AC007620.2	-0.0229594	-21.5783	0.981683	0.99998
DLGAP1	1.48911	0.140301	0.13646	0.289314	STAC	-0.362483	-0.896763	0.716991	0.999049	ARNILA	-0.172049	-22.7458	0.863399	0.999148	AL133353.2	1.1126	0.540841	0.26588	0.604273	CDC42BPA	5.87734	0.664754	4.16915e-09	1.14642e-08	SHISA6	-0.0229594	-21.7763	0.981683	0.99998
LINC02649	1.48437	0.526899	0.137711	0.29176	CNTNAP2	-0.36289	-0.734113	0.716687	0.999049	AL355076.2	-0.172049	-22.6786	0.863399	0.999148	MAP7D2	1.10869	1.08019	0.267563	0.607499	C21orf59-TCP10L	5.86727	2.79576	4.43038e-09	1.21602e-08	ARHGEF3-AS1	-0.0229594	-21.8685	0.981683	0.99998
MIR193BHG	1.47402	1.21592	0.140477	0.29741	AC017083.3	-0.364048	-0.420181	0.715822	0.999049	EDNRB-AS1	-0.172049	-22.7376	0.863399	0.999148	AC133644.3	1.10836	0.914502	0.267704	0.607499	GP6	5.84313	4.88176	5.12291e-09	1.40098e-08	AC016866.2	-0.0229594	-21.7096	0.981683	0.99998
AC091551.1	1.47347	0.894993	0.140625	0.297514	HELLPAR	-0.369474	-0.786744	0.711775	0.999049	IMPG1	-0.172162	-0.199522	0.86331	0.999148	EHF	1.10576	1.4986	0.268831	0.609274	AL139384.1	5.83967	2.97531	5.23028e-09	1.42904e-08	CKM	-0.0229594	-21.6782	0.981683	0.99998
BTBD9	1.45232	-0.0354366	0.146412	0.309322	FAM71D	-0.369882	-0.715837	0.71147	0.999049	C10orf99	-0.172238	-0.487049	0.86325	0.999148	CGNL1	1.10162	0.17715	0.270627	0.61274	DPF1	5.8109	4.48405	6.21378e-09	1.69621e-08	AC024475.3	-0.0229594	-21.548	0.981683	0.99998
AC011346.1	1.44262	1.37367	0.149129	0.314618	AC211433.1	-0.37149	-0.418247	0.710273	0.999049	AC013652.1	-0.173043	-0.922427	0.862617	0.999148	GPC6	1.10075	1.89394	0.271008	0.613139	CCDC175	5.80931	5.27287	6.27288e-09	1.71079e-08	Z98742.4	-0.0229594	-21.5452	0.981683	0.99998
PBX3	1.44039	0.315381	0.149758	0.315701	MAPK8IP2	-0.374319	-1.7822	0.708167	0.999049	AL138479.2	-0.173678	-2.05734	0.862119	0.999148	SLC26A5	1.09897	1.11561	0.271781	0.614426	MAML3	5.7673	0.950767	8.05498e-09	2.19283e-08	TF	-0.0229594	-21.5576	0.981683	0.99998
OASL	1.44005	0.915209	0.149853	0.315701	AL354733.2	-0.374346	-1.96075	0.708147	0.999049	AC104109.4	-0.173684	-2.10925	0.862114	0.999148	LINC02340	1.08185	0.775294	0.27932	0.630277	PNMA8C	5.75949	4.9233	8.43664e-09	2.29464e-08	AC093849.4	-0.0229594	-21.9592	0.981683	0.99998
MT1H	1.438	1.91715	0.150434	0.316586	CHGA	-0.374409	-0.354951	0.7081	0.999049	CA1	-0.175306	-1.43511	0.860839	0.999148	ST3GAL6	1.08162	-0.0323487	0.279423	0.630277	EZH2	5.75427	0.708102	8.70147e-09	2.36453e-08	PRKX-AS1	-0.0229594	-21.5717	0.981683	0.99998
SETBP1	1.43323	0.541913	0.151791	0.319112	AC009542.1	-0.374783	-1.65117	0.707822	0.999049	AL133297.2	-0.175309	-1.39029	0.860837	0.999148	ZDHHC1	1.08023	-0.136106	0.28004	0.631195	AL139260.1	5.74813	2.25728	9.02337e-09	2.44979e-08	AC009403.2	-0.0229594	-21.5731	0.981683	0.99998
TENM3	1.43004	1.03868	0.152706	0.320811	AC002460.2	-0.378898	-0.304887	0.704764	0.999049	BCL2L1-AS1	-0.175309	-1.49855	0.860837	0.999148	AC005062.1	1.0732	0.564688	0.283183	0.636843	AUTS2	5.73846	0.954828	9.55432e-09	2.58925e-08	SLC38A4	-0.0229594	-21.801	0.981683	0.99998
AC079380.1	1.42708	1.54049	0.153557	0.322374	AC004160.1	-0.378914	-0.388448	0.704752	0.999049	TSPAN11	-0.175931	0.165846	0.860348	0.999148	RORA	1.06194	0.119802	0.288262	0.645996	PTPDC1	5.72631	2.18616	1.02641e-08	2.77908e-08	TBX15	-0.0229594	-21.7027	0.981683	0.99998
SGCD	1.42543	1.58149	0.154033	0.323146	PI16	-0.381816	-1.78195	0.702598	0.999049	CD24	-0.176047	-0.62857	0.860257	0.999148	HHAT	1.06179	0.268873	0.288329	0.645996	SLC16A1-AS1	5.72143	1.87376	1.05629e-08	2.85485e-08	AC011479.2	-0.0230038	-0.856546	0.981647	0.99998
PITPNM2	1.41997	1.12427	0.155617	0.32624	TMPRSS5	-0.382246	-1.35435	0.702279	0.999049	AC139720.1	-0.176184	-0.49522	0.860149	0.999148	ADGRL3	1.05045	0.431971	0.293514	0.65712	SPDYA	5.64435	2.92319	1.65812e-08	4.47333e-08	FREM1	-0.0231221	0.132249	0.981553	0.99998
TPBGL	1.4168	1.9833	0.156542	0.327952	CHAT	-0.382705	-1.3636	0.701938	0.999049	CFAP57	-0.176736	0.54227	0.859716	0.999148	SPDYA	1.03975	0.626165	0.298455	0.66713	LINC01697	5.62043	5.19252	1.9048e-08	5.12963e-08	ARHGAP24	-0.0240788	-0.422076	0.98079	0.99998
SLC16A1-AS1	1.41227	0.226434	0.157872	0.330275	AC024145.1	-0.383114	-0.944188	0.701635	0.999049	CLDN12	-0.177599	-22.8641	0.859038	0.999148	PGBD5	1.03933	1.02748	0.298652	0.66713	STXBP5	5.61259	1.25811	1.99326e-08	5.36303e-08	FAM71D	-0.0242859	-0.669264	0.980625	0.99998
SPEF2	1.40549	-0.176555	0.159874	0.334232	HLA-G	-0.38356	-1.00921	0.701305	0.999049	METTL24	-0.177599	-22.8019	0.859038	0.999148	EGLN3	1.03284	0.177688	0.301681	0.67311	AC015660.2	5.52452	4.16502	3.30396e-08	8.87366e-08	BTG4	-0.0243746	-0.439382	0.980554	0.99998
NCKAP5	1.40371	1.06047	0.160404	0.335105	AC093865.1	-0.383622	0.1597	0.701259	0.999049	SLC2A14	-0.177599	-22.8545	0.859038	0.999148	LINC02683	1.03263	1.42081	0.301778	0.67311	RBM14-RBM4	5.52203	3.00535	3.35099e-08	8.99193e-08	AL451049.1	-0.0243944	-21.6909	0.980538	0.99998
LY6D	1.40302	1.36518	0.160611	0.335305	AC021086.1	-0.38474	-0.595361	0.70043	0.999049	LINC00159	-0.177599	-22.8066	0.859038	0.999148	OASL	1.02566	0.768539	0.305052	0.678899	BNC2	5.50566	1.71778	3.6778e-08	9.86005e-08	AL136115.2	-0.0243944	-21.6765	0.980538	0.99998
ACTR3C	1.39997	0.231859	0.161521	0.336971	PHLDB2	-0.385413	-0.892674	0.699931	0.999049	CRB1	-0.177677	-0.255107	0.858977	0.999148	SOX5	1.01699	0.0416432	0.309159	0.687528	PITPNC1	5.49707	0.638373	3.86146e-08	1.03432e-07	AC110058.1	-0.0243944	-21.7425	0.980538	0.99998
CR1	1.39614	2.32346	0.162673	0.338902	CALML3-AS1	-0.386995	-23.7222	0.69876	0.999049	PLA2G3	-0.179226	-2.1204	0.85776	0.999148	WNT7A	1.01623	-0.055589	0.309521	0.687824	PLK1	5.49349	1.13681	3.94062e-08	1.05458e-07	CLMP	-0.0243944	-21.6947	0.980538	0.99998
TSIX	1.39085	1.01958	0.164271	0.341993	GALNT5	-0.388871	-1.82833	0.697372	0.999049	MYH7B	-0.179232	-2.12834	0.857755	0.999148	OSCP1	1.0119	-0.133639	0.311586	0.691901	PRKCE	5.42607	1.94557	5.76069e-08	1.54029e-07	BANCR	-0.0243944	-21.7237	0.980538	0.99998
AC007422.1	1.38264	0.48526	0.166774	0.346965	C10orf99	-0.388916	-2.03318	0.697338	0.999049	GPNMB	-0.179238	-2.36497	0.857751	0.999148	KIF3A	0.999478	-0.126158	0.317563	0.704131	EHBP1	5.41876	0.79791	6.00129e-08	1.60319e-07	AL033529.1	-0.0243944	-21.6405	0.980538	0.99998
LRRC6	1.36958	-0.165879	0.170819	0.354707	CFLAR-AS1	-0.389109	0.0836673	0.697195	0.999049	AC004083.1	-0.179241	-2.58441	0.857748	0.999148	ZRANB2-AS2	0.998867	0.41387	0.317859	0.704267	BTG4	5.39905	5.20181	6.69953e-08	1.78654e-07	ABCB1	-0.0243944	-21.6447	0.980538	0.99998
CA3	1.36948	0.941095	0.17085	0.354707	WDR11-AS1	-0.389728	-1.23169	0.696738	0.999049	SPOCK2	-0.180066	-0.419267	0.857101	0.999148	DACH1	0.99797	1.08335	0.318294	0.70471	FSTL4	5.3735	4.13635	7.72229e-08	2.05745e-07	AC023590.1	-0.0243944	-21.6906	0.980538	0.99998
AC008945.2	1.36295	1.78146	0.172898	0.358709	EML5	-0.390561	-0.77664	0.696122	0.999049	AL138927.1	-0.180847	-1.34687	0.856488	0.999148	MFAP5	0.995363	0.0723283	0.31956	0.706991	HHLA2	5.36905	4.92517	7.91539e-08	2.10702e-07	TUBAL3	-0.0243944	-21.6557	0.980538	0.99998
AL139260.1	1.36048	0.383209	0.173678	0.35983	AC107223.1	-0.390979	-0.7779	0.695813	0.999049	AC092718.1	-0.180856	-1.44485	0.856481	0.999148	AC114763.1	0.981975	1.01654	0.326112	0.720955	CLU	5.36841	1.84867	7.94334e-08	2.11259e-07	CD52	-0.0243944	-21.7374	0.980538	0.99998
THBS1	1.3593	1.27515	0.17405	0.360353	NCCRP1	-0.394031	-24.0289	0.693558	0.999049	AL451069.2	-0.18248	-1.15635	0.855206	0.999148	RASD1	0.975568	0.159087	0.329278	0.727212	KANSL1	5.36738	0.718304	7.98886e-08	2.12281e-07	DACT3-AS1	-0.0243944	-21.5706	0.980538	0.99998
CEMIP	1.34544	1.15718	0.178482	0.369019	AP003059.1	-0.395416	-1.96713	0.692536	0.999049	RSPH14	-0.182689	0.601951	0.855042	0.999148	SPDYE2	0.975269	1.31227	0.329427	0.727212	MAGI2	5.33478	3.27593	9.56609e-08	2.53967e-07	HIGD1B	-0.0243944	-21.7798	0.980538	0.99998
AC053527.2	1.34164	0.445038	0.179714	0.371311	AL161618.1	-0.395427	-2.08674	0.692528	0.999049	AL138995.1	-0.183149	-22.7195	0.854681	0.999148	AF241726.2	0.974306	0.322083	0.329904	0.72773	LINC00592	5.33209	3.47868	9.70895e-08	2.57532e-07	MEF2C	-0.0243944	-21.6457	0.980538	0.99998
KCND3	1.33431	2.33888	0.182103	0.375986	COL5A2	-0.396776	-1.25547	0.691532	0.999049	CCN5	-0.183149	-22.878	0.854681	0.999148	S100A9	0.969637	-0.0856678	0.332228	0.731779	H1-10	5.32866	1.75211	9.89389e-08	2.62206e-07	AL157912.1	-0.0243944	-21.5922	0.980538	0.99998
SPA17	1.32819	-0.134571	0.184116	0.379253	AC138028.2	-0.397162	-1.06094	0.691248	0.999049	AC007923.4	-0.183149	-22.9802	0.854681	0.999148	MSR1	0.968184	1.01168	0.332953	0.732838	PDZK1IP1	5.31655	0.684803	1.05751e-07	2.80011e-07	AL023754.1	-0.0243944	-21.7414	0.980538	0.99998
AC120193.1	1.32796	1.2591	0.18419	0.379253	CASC15	-0.399269	-0.656923	0.689695	0.999049	CCDC3	-0.183149	-22.9109	0.854681	0.999148	FCMR	0.962577	1.08418	0.33576	0.737933	COX6B2	5.26392	4.40548	1.41019e-07	3.73066e-07	CCL7	-0.0243944	-21.7507	0.980538	0.99998
AF241726.2	1.32623	0.344951	0.184764	0.380172	AL109824.1	-0.399529	-0.346535	0.689504	0.999049	AL136531.2	-0.183837	-0.0885068	0.854141	0.999148	LINC01409	0.957285	0.861406	0.338424	0.74239	TAPT1-AS1	5.22845	1.63676	1.70934e-07	4.51012e-07	AC019186.1	-0.0243944	-21.6209	0.980538	0.99998
AC105285.1	1.32425	0.970862	0.185419	0.380933	ABCA10	-0.39955	-0.470604	0.689488	0.999049	AL121974.1	-0.184052	-0.726819	0.853973	0.999148	DDX5	0.957074	2.00072	0.33853	0.74239	ATP9B	5.22795	0.917961	1.71399e-07	4.51842e-07	AC004771.1	-0.0243944	-21.676	0.980538	0.99998
C2CD4A	1.32397	1.23967	0.185514	0.380933	FP671120.5	-0.401535	-3.54034	0.688026	0.999049	AC124944.3	-0.184787	-2.37306	0.853396	0.999148	AC090673.1	0.940354	1.65942	0.347036	0.759379	MB	5.21723	5.11039	1.81615e-07	4.78354e-07	PLCD4	-0.0243944	-21.6681	0.980538	0.99998
AC005237.1	1.3208	1.21839	0.186567	0.382832	LINC01226	-0.401996	-2.47638	0.687687	0.999049	LINC01950	-0.184787	-2.57228	0.853396	0.999148	SIAH2-AS1	0.938133	1.76185	0.348176	0.761318	AF165147.1	5.21044	2.9391	1.88392e-07	4.95769e-07	AC009950.1	-0.0243944	-21.6217	0.980538	0.99998
AC133644.3	1.31525	0.963745	0.188426	0.386382	LRIG2-DT	-0.404184	-1.1187	0.686077	0.999049	LAX1	-0.185615	-0.510537	0.852747	0.999148	AC079142.1	0.936672	0.275665	0.348927	0.762405	SPNS3	5.20279	4.13795	1.96323e-07	5.16187e-07	LINC00596	-0.0243944	-21.8466	0.980538	0.99998
FRMD5	1.31256	0.351734	0.189332	0.387976	AP006545.3	-0.404602	-0.971867	0.68577	0.999049	APCDD1L-DT	-0.186397	-1.42894	0.852134	0.999148	RNF165	0.935061	1.10779	0.349757	0.763661	WDR7	5.18417	1.45037	2.16976e-07	5.69491e-07	AC007610.2	-0.0243944	-21.6171	0.980538	0.99998
ADAMTS9	1.30075	0.178269	0.193343	0.395655	KCNH8	-0.40461	-0.926594	0.685764	0.999049	TRIM74	-0.1864	-1.41886	0.852131	0.999148	KLHDC1	0.932724	0.259774	0.350962	0.765736	SRGAP1	5.14186	2.39796	2.72036e-07	7.12759e-07	AL161757.5	-0.0243944	-21.5925	0.980538	0.99998
AL078604.4	1.29666	0.830768	0.194749	0.39826	AC092574.2	-0.406989	-0.480461	0.684016	0.999049	AL137077.2	-0.186403	-1.51809	0.852129	0.999148	AL683813.2	0.928897	0.834825	0.352943	0.769497	SLC7A11	5.12891	0.629957	2.91418e-07	7.62875e-07	LINC02158	-0.0243944	-21.7489	0.980538	0.99998
SPATA5	1.28756	0.102754	0.197899	0.404425	AL592295.3	-0.409924	-1.67355	0.681862	0.999049	AL137186.2	-0.186406	-1.57106	0.852126	0.999148	CCPG1	0.92756	0.559238	0.353636	0.770449	CSGALNACT1	5.12814	4.41344	2.92618e-07	7.65348e-07	AC005993.1	-0.0243944	-21.6859	0.980538	0.99998
KCNQ1OT1	1.28143	0.323408	0.200044	0.408464	UBE2R2-AS1	-0.41037	-1.46818	0.681535	0.999049	AL157911.1	-0.187232	-0.462181	0.851478	0.999148	CRACD	0.924192	0.847032	0.355387	0.773701	TIMP1	5.11866	1.66441	3.07707e-07	8.04113e-07	AL121768.1	-0.0243944	-21.729	0.980538	0.99998
AC007285.1	1.28109	1.47591	0.200162	0.408464	AC138356.3	-0.411227	-1.14591	0.680906	0.999049	AP001372.1	-0.188007	-1.04657	0.850871	0.999148	CFAP69	0.921145	-0.108499	0.356975	0.776595	SOX6	5.11004	1.14094	3.22089e-07	8.40962e-07	AC022872.1	-0.0243944	-21.7714	0.980538	0.99998
AC007000.4	1.28074	-0.0169546	0.200284	0.408464	SLCO5A1	-0.411473	-0.270386	0.680726	0.999049	RHCE	-0.18801	-1.02743	0.850869	0.999148	C21orf59-TCP10L	0.920484	0.412865	0.35732	0.776782	ALKAL2	5.09576	0.684239	3.47342e-07	9.0611e-07	AC092338.3	-0.0254891	-0.441373	0.979665	0.99998
AC004771.3	1.28011	1.33313	0.200507	0.408641	ADAMTSL4-AS2	-0.411643	-0.866302	0.680601	0.999049	CSMD1	-0.189378	0.34808	0.849797	0.999148	KIF26B	0.908408	0.0145378	0.363663	0.789427	AC116362.1	5.09495	2.4028	3.48841e-07	9.0923e-07	LINC02666	-0.0256863	-0.743416	0.979508	0.99998
HPN	1.27614	1.61663	0.201905	0.410654	SPINK13	-0.412047	-0.883919	0.680305	0.999049	STAT4	-0.189577	-0.63877	0.84964	0.999148	SPDYE3	0.896374	0.838201	0.370053	0.800404	AL357507.1	5.08724	2.54883	3.63318e-07	9.46142e-07	AC084782.2	-0.0258293	-21.8348	0.979393	0.99998
AC079142.1	1.27479	0.17022	0.202385	0.411351	AC012629.2	-0.416069	-2.65613	0.67736	0.999049	AC053503.1	-0.189582	-0.777104	0.849637	0.999148	PAK3	0.889146	0.768858	0.373924	0.807612	ISG15	5.07356	0.707487	3.90451e-07	1.01592e-06	Z82215.1	-0.0258293	-21.7811	0.979393	0.99998
S100A9	1.2691	-0.185423	0.204407	0.41518	DDTL	-0.416069	-2.57455	0.67736	0.999049	AC012409.2	-0.189614	-0.857172	0.849612	0.999148	CITED2	0.886088	-0.0773401	0.37557	0.810583	TUB	5.04941	5.23304	4.43174e-07	1.1521e-06	AC092794.2	-0.0258293	-21.8466	0.979393	0.99998
CAPN6	1.26477	1.71197	0.205952	0.418036	AC079035.1	-0.416079	-2.72719	0.677352	0.999049	AL359538.4	-0.190323	-2.06929	0.849056	0.999148	PCAT1	0.885206	0.0396558	0.376045	0.811025	TFF1	5.03143	2.40556	4.86831e-07	1.2634e-06	TH	-0.0258293	-21.6806	0.979393	0.99998
CUBN	1.26253	1.14736	0.206758	0.419104	GRIP2	-0.416968	-1.7814	0.676702	0.999049	LINC02449	-0.190335	-2.57211	0.849046	0.999148	ZNF503	0.882438	1.72428	0.37754	0.813664	AC015813.8	5.02532	5.40511	5.02603e-07	1.30321e-06	AC003093.1	-0.0258293	-21.9672	0.979393	0.99998
EDN2	1.26019	2.2481	0.2076	0.41996	LINC00589	-0.416995	-1.91274	0.676682	0.999049	SERPINF1	-0.190642	0.130976	0.848806	0.999148	AC010197.1	0.87837	1.71352	0.379743	0.817824	APBB2	5.00847	0.773094	5.4863e-07	1.42132e-06	ESRRB	-0.0258293	-21.7736	0.979393	0.99998
CATSPERG	1.25451	0.704973	0.209656	0.423548	AC005532.1	-0.417402	-1.45113	0.676384	0.999049	LINC02343	-0.191163	-0.551242	0.848398	0.999148	SYNGAP1-AS1	0.877826	1.00818	0.380038	0.817873	EXOC6B	5.00054	0.848738	5.71709e-07	1.47983e-06	NLRC3	-0.0258293	-21.8033	0.979393	0.99998
H2AX	1.25368	-0.132821	0.209959	0.423873	AC011479.2	-0.418241	-0.9992	0.675771	0.999049	CLNK	-0.191711	-0.0514178	0.847969	0.999148	GAL	0.870981	0.491099	0.383765	0.8253	TTLL6	4.98433	6.52726	6.21781e-07	1.60805e-06	RBMS3-AS2	-0.0258293	-21.6698	0.979393	0.99998
AC006299.1	1.25291	1.35301	0.210239	0.424155	AP001628.1	-0.419923	-0.69656	0.674542	0.999049	PAMR1	-0.191784	-0.180386	0.847912	0.999148	SFRP2	0.869411	1.03462	0.384622	0.826552	AC108752.1	4.97392	1.65832	6.56117e-07	1.69539e-06	CARMIL3	-0.0258293	-21.7114	0.979393	0.99998
ARRDC3-AS1	1.22117	0.144162	0.222022	0.446426	LINC01805	-0.422176	-23.778	0.672897	0.999049	SHOC1	-0.191947	-1.48428	0.847784	0.999148	AL157931.1	0.867086	0.133692	0.385895	0.828515	HBEGF	4.95785	0.949034	7.12777e-07	1.84022e-06	XAGE2	-0.0258293	-21.7872	0.979393	0.99998
AC087500.1	1.20774	0.159147	0.227148	0.45612	AC021851.1	-0.423859	-0.167246	0.671668	0.999049	AC131571.1	-0.191962	-1.59663	0.847772	0.999148	KSR2	0.866733	0.568778	0.386088	0.828515	CXorf58	4.95323	3.18093	7.29905e-07	1.8812e-06	AC022973.4	-0.0258293	-21.9409	0.979393	0.99998
CRPPA	1.19779	0.0358718	0.231	0.463235	STAR	-0.424106	-2.03841	0.671489	0.999049	AC005699.1	-0.193546	-1.03312	0.846531	0.999148	AC007000.4	0.864156	0.00421367	0.387502	0.830362	ERICH3-AS1	4.95188	3.64132	7.35001e-07	1.89165e-06	H2AC19	-0.0258293	-21.6441	0.979393	0.99998
FAM110B	1.19333	0.840122	0.232742	0.466105	SLC4A4	-0.424843	-1.35606	0.670951	0.999049	AC004830.2	-0.193549	-0.988073	0.846529	0.999148	NRP1	0.861598	0.464711	0.388909	0.832187	AC104078.2	4.95182	4.37038	7.35222e-07	1.89165e-06	SYCP3	-0.0258293	-21.7681	0.979393	0.99998
SLCO1B3-SLCO1B7	1.18279	1.11434	0.236892	0.473468	TRH	-0.42487	-1.43375	0.670932	0.999049	LINC02241	-0.193589	-1.10808	0.846498	0.999148	NUPR1	0.856296	-0.162915	0.391834	0.836023	LINC01004	4.91035	1.26697	9.09132e-07	2.3371e-06	AL360227.1	-0.0258293	-21.7172	0.979393	0.99998
SEC14L2	1.17938	1.19173	0.238245	0.47554	AC005410.2	-0.426138	-0.9365	0.670007	0.999049	RHCG	-0.194249	-22.914	0.845981	0.999148	SLC22A23	0.853095	0.0150238	0.393606	0.83865	TRIO	4.88579	0.580812	1.03013e-06	2.64135e-06	AC008937.2	-0.0258293	-21.8037	0.979393	0.99998
JPH2	1.16569	1.5898	0.243741	0.485218	LINC00326	-0.430152	-2.82054	0.667085	0.999049	TTC21B-AS1	-0.194249	-22.8885	0.845981	0.999148	CNTNAP2	0.844111	1.94467	0.398607	0.847499	NLK	4.86763	1.47525	1.12945e-06	2.89355e-06	AC104938.1	-0.0258293	-21.6874	0.979393	0.99998
SLC6A14	1.16496	1.01531	0.244034	0.485478	AC097448.1	-0.431027	-1.67577	0.666448	0.999049	AL132712.1	-0.194313	-0.28757	0.845931	0.999148	RUNX2	0.834932	0.257391	0.403756	0.855415	KLHDC1	4.85668	1.68195	1.19373e-06	3.05301e-06	ZPBP	-0.0258293	-21.7153	0.979393	0.99998
MAP2	1.15137	0.504783	0.249581	0.495529	ABCA4	-0.431464	-1.5532	0.666131	0.999049	AL132671.2	-0.195875	-2.24742	0.844708	0.999148	PIP5K1B	0.828979	0.442713	0.407116	0.860711	PLB1	4.85233	2.83157	1.22018e-06	3.118e-06	AC084816.1	-0.0272643	-22.0425	0.978249	0.99998
PRKCA	1.14545	0.179648	0.252022	0.500044	ARPC3	-0.431884	-1.29652	0.665825	0.999049	FNDC1	-0.195878	-2.27746	0.844706	0.999148	AC078881.1	0.825244	0.834994	0.409233	0.864137	KLF2	4.84718	3.28149	1.2523e-06	3.19735e-06	AC129926.1	-0.0272643	-21.7994	0.978249	0.99998
PSMD6-AS2	1.13697	1.22821	0.255552	0.506378	PROCR	-0.431887	-1.21901	0.665823	0.999049	SLC22A1	-0.195881	-2.32387	0.844704	0.999148	SLIT2	0.823323	-0.00663935	0.410324	0.864868	PHEX	4.84253	4.5718	1.282e-06	3.2704e-06	AC023480.1	-0.0272643	-21.8738	0.978249	0.99998
STXBP4	1.13628	0.00708699	0.255839	0.506612	AC093227.2	-0.431887	-1.31653	0.665823	0.999049	CASC15	-0.19642	-0.0579931	0.844281	0.999148	AKNAD1	0.823299	1.03622	0.410338	0.864868	BANK1	4.83391	0.927704	1.33876e-06	3.41231e-06	AC020978.3	-0.0272643	-21.9101	0.978249	0.99998
AC023421.2	1.12369	0.787932	0.261146	0.516438	AC092338.3	-0.432298	-1.12495	0.665525	0.999049	AL021997.3	-0.197485	-1.37725	0.843448	0.999148	ZNF235	0.822972	0.266472	0.410524	0.864868	SCEL	4.81181	0.78458	1.49573e-06	3.80593e-06	MPP7-DT	-0.0272643	-21.8959	0.978249	0.99998
PRKD1	1.12082	0.559079	0.262363	0.518504	FGF2	-0.433112	-0.846418	0.664934	0.999049	AL163952.1	-0.197488	-1.48752	0.843446	0.999148	SCGB2B2	0.812923	0.323357	0.416262	0.8745	CHN1	4.80052	2.99656	1.5825e-06	4.01651e-06	CACNA1C-AS1	-0.0272643	-21.7658	0.978249	0.99998
DUSP18	1.11567	-0.164753	0.264562	0.521819	AC127526.1	-0.433545	-0.788038	0.664619	0.999049	AC022395.1	-0.197509	-1.65094	0.843429	0.999148	NOSTRIN	0.810537	0.509741	0.417632	0.876763	RUNX2	4.79947	2.10147	1.59084e-06	4.03425e-06	AP003783.1	-0.0272643	-22.3406	0.978249	0.99998
MCC	1.11387	0.808579	0.265335	0.522999	SLC2A3	-0.434309	-0.807968	0.664064	0.999049	TP63	-0.198314	-0.576886	0.842799	0.999148	MICU3	0.805248	0.101697	0.420676	0.88069	RAPGEF5	4.78783	1.37178	1.68593e-06	4.27177e-06	MAP3K15	-0.0272643	-21.9165	0.978249	0.99998
DACH1	1.10826	1.09134	0.267748	0.527125	ENPEP	-0.437207	-2.98181	0.661962	0.999049	AP003068.1	-0.199799	-22.8993	0.841638	0.999148	GARNL3	0.803198	0.791723	0.421861	0.882296	UFL1-AS1	4.78254	2.9048	1.73096e-06	4.38217e-06	AC008731.1	-0.0272643	-21.8397	0.978249	0.99998
TAGLN	1.10819	0.467021	0.26778	0.527125	AP000317.2	-0.437615	-2.11029	0.661665	0.999049	AC139530.3	-0.199799	-23.0078	0.841638	0.999148	AC092650.1	0.802902	1.38674	0.422032	0.882296	MTMR8	4.77753	1.04917	1.77461e-06	4.48889e-06	CYP4F26P	-0.0272643	-21.7838	0.978249	0.99998
FREM1	1.10722	0.935443	0.268198	0.527603	PLS3-AS1	-0.438515	-1.68276	0.661013	0.999049	COL8A2	-0.199799	-22.8661	0.841638	0.999148	EXOSC7	0.795544	0.69853	0.426297	0.890592	AC024230.1	4.74598	0.474985	2.07497e-06	5.24425e-06	AL355916.3	-0.0272643	-21.8327	0.978249	0.99998
EXOSC7	1.10354	0.852123	0.269792	0.530391	EYA1	-0.438947	-1.38869	0.6607	0.999049	SYCP2L	-0.201444	-2.68706	0.840351	0.999148	CHN1	0.793411	0.580264	0.427539	0.892565	KLHL29	4.72184	1.51221	2.33715e-06	5.90189e-06	AL354811.1	-0.0272643	-21.9603	0.978249	0.99998
AL591806.4	1.10156	0.8895	0.270654	0.531737	MAL	-0.439134	-1.80946	0.660565	0.999049	AKR1C2	-0.202037	0.169855	0.839887	0.999148	LINC01480	0.780374	-0.113912	0.435171	0.907866	ZRANB2-AS2	4.70701	2.01946	2.51372e-06	6.33712e-06	AC090772.2	-0.0272643	-21.8983	0.978249	0.99998
AC010615.4	1.09929	1.14498	0.271644	0.533332	ANKRD18B	-0.440144	-0.885463	0.659833	0.999049	LINC01226	-0.202248	-0.649523	0.839723	0.999148	MT1H	0.776424	1.00596	0.437498	0.910191	CD14	4.70272	3.5777	2.56725e-06	6.46662e-06	CACNA2D1	-0.0272643	-21.7657	0.978249	0.99998
EPM2A	1.09683	0.858798	0.272716	0.535087	AQP7	-0.444655	-2.15522	0.656569	0.996815	PLD5	-0.205349	-23.0722	0.837299	0.999148	FBXL2	0.768766	-0.12957	0.442033	0.91835	PLAT	4.70063	3.2446	2.5936e-06	6.52753e-06	SLC7A9	-0.0272643	-21.9674	0.978249	0.99998
MSI1	1.07547	1.14969	0.282166	0.552544	NRIP3	-0.44634	-1.2045	0.655351	0.995471	LINC01250	-0.205349	-23.0543	0.837299	0.999148	SOX2-OT	0.764159	0.890981	0.444772	0.922158	PRR15	4.68636	0.738556	2.78108e-06	6.98763e-06	DPP9-AS1	-0.0272643	-21.8147	0.978249	0.99998
SERPINB4	1.06776	1.43456	0.285627	0.558958	TMEM132C	-0.447932	-0.786449	0.654202	0.994228	DOK6	-0.206221	-0.974351	0.836618	0.999148	AL591368.1	0.763266	1.16694	0.445305	0.922463	FBXL17	4.66706	0.562505	3.05542e-06	7.67051e-06	IDH2-DT	-0.0272643	-21.9874	0.978249	0.99998
RBM44	1.04751	1.59082	0.294864	0.575907	ARHGAP31	-0.448656	-0.489745	0.65368	0.993938	SAMD11	-0.206236	-0.90988	0.836606	0.999148	METTL27	0.755798	-0.100297	0.44977	0.927999	MIR31HG	4.65894	0.669769	3.17844e-06	7.97269e-06	P2RY12	-0.0272643	-21.925	0.978249	0.99998
NRP1	1.04329	0.427109	0.296812	0.578957	OCA2	-0.448741	-0.639313	0.653618	0.993938	AC091212.1	-0.20627	-1.033	0.83658	0.999148	ULK4	0.753221	-0.161192	0.451317	0.929449	IMMP2L	4.655	0.561998	3.23981e-06	8.11983e-06	LANCL1-AS1	-0.0279842	0.260046	0.977675	0.99998
CCPG1	1.03706	0.494657	0.299708	0.583467	AL731577.2	-0.45201	-0.142461	0.651262	0.991266	ACVRL1	-0.206819	-0.107945	0.836151	0.999148	AP001011.2	0.750196	0.768161	0.453137	0.93238	TMPO	4.65403	0.634467	3.25506e-06	8.15125e-06	AC130814.1	-0.0286993	-21.8974	0.977104	0.99998
CPEB3	1.03309	0.189151	0.30156	0.586313	UTS2B	-0.452123	-1.81542	0.65118	0.991266	AC027682.4	-0.206978	-2.41841	0.836027	0.999148	DAPL1	0.744994	0.366613	0.456275	0.938195	KIF26B-AS1	4.65269	4.78782	3.2764e-06	8.19783e-06	AC113385.1	-0.0286993	-21.9933	0.977104	0.99998
HMGA2-AS1	1.02094	1.81445	0.307282	0.594803	STX16-NPEPL1	-0.455699	-0.584438	0.648607	0.988227	AC080005.1	-0.208575	-1.51109	0.83478	0.999148	STK33	0.739843	-0.293924	0.459395	0.943734	ZSCAN1	4.64823	4.8414	3.34787e-06	8.36969e-06	BMPER	-0.0286993	-21.9125	0.977104	0.99998
SLC26A5	1.02087	0.884507	0.307315	0.594803	ALDH1A2	-0.456062	-0.552069	0.648345	0.988227	YIPF7	-0.208594	-1.55708	0.834765	0.999148	LINC00534	0.739508	0.935557	0.459599	0.943734	THRB	4.63692	1.49628	3.53637e-06	8.82621e-06	GASK1A	-0.0286993	-21.9108	0.977104	0.99998
AC078881.1	1.01022	0.764553	0.312389	0.604234	GJB4	-0.458736	-2.41334	0.646424	0.985903	AL078644.2	-0.209408	-0.612667	0.83413	0.999148	ARMCX4	0.73752	1.09824	0.460806	0.945566	DOCK5	4.63046	0.824951	3.64857e-06	9.09868e-06	AC123595.3	-0.0286993	-21.8607	0.977104	0.99998
ANKRD30BL	1.00835	0.561449	0.313285	0.605228	STAM-AS1	-0.459574	-1.6606	0.645822	0.985486	AC129102.1	-0.210164	-1.0623	0.83354	0.999148	LINC00271	0.734909	-0.0249388	0.462395	0.948178	FHIT	4.61819	0.526265	3.87104e-06	9.64545e-06	AC017050.1	-0.0286993	-21.9945	0.977104	0.99998
RNF217-AS1	1.00831	0.663289	0.313307	0.605228	AP001160.1	-0.460887	-1.17957	0.64488	0.98455	LINC02185	-0.210186	-1.09724	0.833523	0.999148	ABCA12	0.731255	0.632337	0.464623	0.952097	LINC00871	4.59598	1.40413	4.30724e-06	1.07234e-05	H1-8	-0.0286993	-21.7752	0.977104	0.99998
RGN	1.00132	0.941706	0.316674	0.611339	IQCJ-SCHIP1	-0.463508	-0.432962	0.643	0.982179	AC105001.1	-0.210189	-1.15661	0.833521	0.999148	AC116345.1	0.727081	1.29456	0.467176	0.955371	LINC02055	4.58034	3.41106	4.64225e-06	1.15479e-05	AC010623.1	-0.0286993	-21.9528	0.977104	0.99998
LINC02683	0.996724	1.32179	0.318899	0.615238	AC024940.1	-0.465309	-2.73825	0.64171	0.980708	LRRN1	-0.210201	-1.19612	0.833511	0.999148	AL353138.1	0.7221	0.54731	0.470233	0.960734	GRIK2	4.57697	2.93615	4.7175e-06	1.17253e-05	AC010327.7	-0.0286993	-21.8911	0.977104	0.99998
AKNAD1	0.995522	0.981331	0.319482	0.615968	TBC1D10A	-0.465835	-0.200755	0.641334	0.980633	ALDH1L1-AS1	-0.210855	-0.330977	0.833001	0.999148	WFDC2	0.718337	1.36389	0.472549	0.964387	TPK1	4.56771	0.939613	4.9308e-06	1.22454e-05	AC091132.4	-0.0286993	-21.8381	0.977104	0.99998
FANK1	0.992166	-0.220503	0.321116	0.618291	SGIP1	-0.466182	-2.06322	0.641085	0.980633	CXCL11	-0.211759	-0.832882	0.832295	0.999148	ASRGL1	0.712723	1.7642	0.476017	0.970803	KIF9-AS1	4.56259	1.58814	5.05266e-06	1.25376e-05	AC090630.1	-0.0286993	-21.9981	0.977104	0.99998
AC139530.2	0.991779	1.93023	0.321305	0.618291	PAMR1	-0.466636	-1.74449	0.64076	0.980633	AC027644.4	-0.21178	-0.923492	0.832278	0.999148	DKK1	0.708888	0.0521902	0.478394	0.974326	LRRC4	4.54015	2.71843	5.6215e-06	1.39376e-05	AL391845.1	-0.0286993	-21.783	0.977104	0.99998
AC012593.2	0.985529	0.841286	0.324364	0.623526	AC079760.1	-0.470111	-0.526614	0.638276	0.977452	DDTL	-0.213317	-0.557656	0.831079	0.999148	AC114956.2	0.69829	0.423172	0.484996	0.984579	C8orf37-AS1	4.53288	1.78268	5.81849e-06	1.44141e-05	AL359813.1	-0.0286993	-21.9255	0.977104	0.99998
STEAP2-AS1	0.984173	0.857136	0.32503	0.624006	AC023509.6	-0.470424	-0.444657	0.638052	0.977452	ADGRV1	-0.214131	-1.54152	0.830445	0.999148	AC008691.1	0.698133	1.58392	0.485094	0.984579	EFR3B	4.52772	4.55628	5.96246e-06	1.47586e-05	LINC02492	-0.0286993	-21.8738	0.977104	0.99998
OSBP2	0.984017	0.383086	0.325107	0.624006	AC005914.1	-0.471901	-3.89141	0.636998	0.976491	B4GALT4-AS1	-0.214131	-1.61457	0.830445	0.999148	GNAS-AS1	0.697648	1.09959	0.485398	0.984579	KCNB1	4.51321	5.02268	6.38524e-06	1.5792e-05	AL031848.1	-0.0286993	-21.9185	0.977104	0.99998
AC078785.1	0.980996	1.51463	0.326595	0.62613	ELMOD1	-0.47234	-2.74211	0.636684	0.976491	PLAC8L1	-0.21415	-1.78603	0.83043	0.999148	Z97986.1	0.683312	1.35646	0.49441	0.99972	CSMD1	4.50245	4.3017	6.71759e-06	1.66003e-05	CUX2	-0.0286993	-21.9353	0.977104	0.99998
EPHA6	0.980922	1.46512	0.326631	0.62613	AC011773.4	-0.472777	-2.16226	0.636373	0.976491	KMO	-0.215409	-0.0794408	0.829448	0.999148	MCTP2	0.667749	-0.00371536	0.504294	0.99972	CREB5	4.49921	1.78442	6.82055e-06	1.68409e-05	AL163636.2	-0.0286993	-21.9419	0.977104	0.99998
GAL	0.970488	0.351359	0.331803	0.635233	AC106818.2	-0.473708	-1.80208	0.635708	0.97601	AC025244.1	-0.216373	-0.333203	0.828697	0.999148	AC116535.2	0.657286	1.59862	0.510997	0.99972	MARK1	4.4868	0.851702	7.23006e-06	1.78373e-05	AC008945.2	-0.0295277	0.381241	0.976444	0.99998
KSR2	0.963197	0.405329	0.335448	0.640984	LANCL1-AS1	-0.474086	-1.45376	0.635439	0.97601	LINC02432	-0.217318	-0.953807	0.82796	0.999148	FN1	0.655574	1.10258	0.512098	0.99972	SRD5A2	4.4789	4.37354	7.50286e-06	1.848e-05	IER3	-0.02972	-0.0771645	0.97629	0.99998
SRGAP1	0.960391	0.248279	0.336858	0.643269	SERPINB7	-0.474736	-1.69104	0.634975	0.975884	AC004594.1	-0.218074	-2.41941	0.827371	0.999148	LINC01355	0.653622	1.15461	0.513355	0.99972	BCAS1	4.46877	3.49855	7.86692e-06	1.93607e-05	LRRIQ4	-0.0301342	-21.9731	0.97596	0.99998
PHACTR1	0.940066	1.00386	0.347184	0.660464	STK32A	-0.475265	-0.974357	0.634598	0.975804	AL359198.1	-0.219691	-1.72157	0.826112	0.999148	KSR1	0.651694	0.191953	0.514599	0.99972	HMMR	4.46375	0.606863	8.05372e-06	1.98042e-05	H4C1	-0.0301342	-21.9403	0.97596	0.99998
TMEM132C	0.931718	1.92476	0.351482	0.668115	Z97986.1	-0.475675	-0.889577	0.634306	0.975804	AL109811.1	-0.2197	-1.72886	0.826105	0.999148	CFAP53	0.649248	-0.246121	0.516178	0.99972	KLHDC7A	4.44062	2.90048	8.96995e-06	2.20392e-05	AL117350.2	-0.0301342	-22.022	0.97596	0.99998
AC008758.5	0.930631	0.665706	0.352044	0.668115	FN1	-0.478515	-0.609501	0.632284	0.973243	MRPS9-AS2	-0.221267	-1.16101	0.824884	0.999148	AC021851.1	0.648511	0.944017	0.516655	0.99972	HNF4G	4.43956	1.1809	9.01429e-06	2.213e-05	AL356805.1	-0.0301342	-22.0383	0.97596	0.99998
AC015631.1	0.930376	1.13746	0.352176	0.668115	ADGRF4	-0.478925	-3.80323	0.631992	0.973243	MIR548A1HG	-0.22127	-1.11162	0.824882	0.999148	NTS	0.647375	0.463497	0.517389	0.99972	FAM160A1	4.43731	0.717155	9.10914e-06	2.23446e-05	OR13A1	-0.0301342	-22.0052	0.97596	0.99998
AC011476.3	0.926689	0.537079	0.354088	0.671045	NFASC	-0.479368	-2.80097	0.631677	0.973243	AC010768.1	-0.22127	-1.18798	0.824882	0.999148	AC009061.2	0.645663	0.550361	0.518497	0.99972	LINC02730	4.38954	5.49004	1.13592e-05	2.78411e-05	AC114689.3	-0.0301342	-22.1249	0.97596	0.99998
NMUR2	0.917137	1.4531	0.359071	0.678773	SRPK3	-0.479371	-2.80691	0.631675	0.973243	APBA1	-0.221304	-1.22224	0.824856	0.999148	LINC01725	0.644476	0.254247	0.519267	0.99972	NBEA	4.38321	3.01505	1.16944e-05	2.86394e-05	NNAT	-0.0301342	-22.083	0.97596	0.99998
MYO3B	0.915435	0.320054	0.359963	0.679997	AC066613.2	-0.479806	-2.06094	0.631365	0.973243	LINC01482	-0.221999	-23.1628	0.824315	0.999148	RGS6	0.644317	0.0078161	0.51937	0.99972	C10orf53	4.3758	5.73945	1.20988e-05	2.96055e-05	AC008667.1	-0.0301342	-22.0419	0.97596	0.99998
ALMS1	0.911733	-0.138944	0.361909	0.682418	AP000424.1	-0.480252	-1.96118	0.631048	0.973243	SPDYE21P	-0.222716	-0.191194	0.823757	0.999148	BACH2	0.642469	0.912518	0.520569	0.99972	CCL20	4.3593	0.363013	1.30478e-05	3.19016e-05	MIR646HG	-0.0301342	-21.9666	0.97596	0.99998
ALG13-AS1	0.906978	0.774432	0.364419	0.686719	SMCO2	-0.480271	-2.0296	0.631035	0.973243	AC093817.2	-0.222853	-0.860723	0.82365	0.999148	C15orf48	0.640404	-0.178178	0.52191	0.99972	SLC9C2	4.29671	4.09441	1.73354e-05	4.23504e-05	CCDC148-AS1	-0.0301342	-22.1664	0.97596	0.99998
LINC02614	0.902544	0.829787	0.366768	0.690712	ISM1	-0.487278	-1.94556	0.626062	0.967139	ZNF664	-0.223626	-2.75818	0.823048	0.999148	CPNE8	0.639081	1.05371	0.52277	0.99972	LINC02615	4.26929	2.90537	1.96096e-05	4.78283e-05	Z99127.1	-0.0301342	-22.0527	0.97596	0.99998
AL683813.2	0.897433	0.627876	0.369488	0.694962	ERG	-0.487698	-1.68227	0.625764	0.967139	AC034195.1	-0.223629	-2.64777	0.823046	0.999148	LINC00624	0.635808	0.868991	0.524902	0.99972	HS2ST1	4.26762	1.31952	1.97568e-05	4.81482e-05	ZNF469	-0.0301342	-22.025	0.97596	0.99998
VAV3	0.893793	0.218833	0.371433	0.698182	AC116535.2	-0.488103	-1.46447	0.625477	0.967139	FGF21	-0.225219	-1.52017	0.821809	0.999148	FAM107A	0.634471	-0.0145925	0.525774	0.99972	AC114956.2	4.24962	2.59119	2.14131e-05	5.21423e-05	LINC01973	-0.0301342	-21.9082	0.97596	0.99998
RBP5	0.893071	1.212	0.371819	0.69847	MUC21	-0.488817	-1.80939	0.624971	0.966948	AQP4-AS1	-0.22525	-1.87587	0.821785	0.999148	AC090844.2	0.630503	1.17005	0.528365	0.99972	IL4I1	4.24918	0.663128	2.14558e-05	5.22039e-05	FAM85B	-0.0301342	-22.0564	0.97596	0.99998
AC116345.1	0.886466	1.67644	0.375366	0.704693	CRMP1	-0.489697	-0.936598	0.624348	0.966483	AC025442.2	-0.225262	-1.90089	0.821776	0.999148	TBC1D10A	0.62482	0.825309	0.532089	0.99972	ZNF19	4.23011	2.89913	2.3358e-05	5.67861e-05	LINC01502	-0.0301342	-22.0633	0.97596	0.99998
LGALSL-DT	0.885022	1.15697	0.376145	0.705712	AC090673.1	-0.491196	-0.681101	0.623288	0.96534	AC005920.2	-0.22681	-1.08255	0.820572	0.999148	ARMH4	0.624785	0.0141378	0.532112	0.99972	DGKG	4.20323	3.64539	2.6313e-05	6.39181e-05	CDKL4	-0.0301342	-22.2329	0.97596	0.99998
FGF13	0.874523	1.25596	0.381833	0.715044	TMEM72-AS1	-0.492593	-0.408704	0.6223	0.964308	NTF3	-0.226825	-1.27905	0.82056	0.999148	RABL2A	0.624189	-0.179886	0.532503	0.99972	AC139019.1	4.19475	2.97065	2.73175e-05	6.63047e-05	C12orf40	-0.0301342	-21.9691	0.97596	0.99998
IFT172	0.873317	-0.163547	0.38249	0.715827	ALDH1L1-AS1	-0.493443	-2.85588	0.621699	0.963875	CNTN5	-0.227947	0.0108889	0.819687	0.999148	AC079921.1	0.624183	1.00794	0.532507	0.99972	TMEM241	4.19171	2.23939	2.76864e-05	6.71456e-05	LINC02831	-0.0301342	-21.9514	0.97596	0.99998
CRTC3-AS1	0.872344	0.392894	0.383021	0.716373	LINC00637	-0.50134	-1.94966	0.616132	0.955738	AP003086.1	-0.228482	-1.06695	0.819271	0.999148	SLCO3A1	0.615814	-0.04168	0.538017	0.99972	SEC14L1	4.19115	1.15615	2.77544e-05	6.72561e-05	AL449403.3	-0.0301342	-21.9075	0.97596	0.99998
MYRFL	0.866255	0.490886	0.38635	0.720894	SGCD	-0.501563	-0.206209	0.615975	0.955738	LINC02832	-0.228824	0.392618	0.819006	0.999148	WDR45	0.61569	0.858699	0.538099	0.99972	AL121899.2	4.17989	4.72376	2.91652e-05	7.0618e-05	AC092115.3	-0.0301342	-22.0287	0.97596	0.99998
AC007262.2	0.856007	0.920133	0.391994	0.730877	RHOXF1-AS1	-0.503378	-1.05753	0.614698	0.9545	SLC14A2-AS1	-0.230803	-2.00772	0.817468	0.999148	MTCL1	0.615081	0.873458	0.538501	0.99972	IGFBP3	4.16371	0.573275	3.1312e-05	7.57549e-05	PRSS1	-0.0303906	0.274736	0.975756	0.99998
CARNMT1-AS1	0.846941	0.732495	0.397028	0.739438	MMADHC-DT	-0.50447	-0.781863	0.613931	0.953803	ZMAT4	-0.233099	-23.196	0.815685	0.999148	NT5DC4	0.614546	3.40526	0.538854	0.99972	ABL2	4.15271	1.04436	3.28567e-05	7.9428e-05	AC008691.1	-0.0314854	-0.807668	0.974882	0.99998
DLGAP4-AS1	0.845259	0.921337	0.397966	0.740632	KMO	-0.509294	-1.72537	0.610546	0.949035	NEGR1	-0.233935	-0.861568	0.815036	0.999148	HMGA1P4	0.613773	0.227361	0.539365	0.99972	MCTP2	4.14791	1.23508	3.35522e-05	8.1044e-05	C9orf153	-0.0315692	-22.1123	0.974816	0.99998
C1QTNF7-AS1	0.829578	0.459518	0.406778	0.755709	ACKR2	-0.509604	-1.27933	0.610329	0.949035	AC017002.3	-0.233999	-1.07569	0.814986	0.999148	TSIX	0.60867	0.399302	0.542743	0.99972	MYO3B	4.13141	2.26144	3.6055e-05	8.70194e-05	TGFB2-AS1	-0.0315692	-22.0608	0.974816	0.99998
SLC5A1	0.826588	1.65221	0.40847	0.75783	LINC02795	-0.510395	-1.06484	0.609775	0.94882	AC093425.1	-0.234717	-2.59967	0.814429	0.999148	FCGBP	0.604223	0.120119	0.545695	0.99972	AURKA	4.10451	0.696774	4.0517e-05	9.77099e-05	CACNB4	-0.0315692	-22.2161	0.974816	0.99998
AL157392.3	0.820098	1.02977	0.41216	0.763731	KCTD16	-0.51075	-0.851535	0.609526	0.94882	AC129492.1	-0.234723	-2.82291	0.814424	0.999148	AC021236.1	0.603807	1.89805	0.545972	0.99972	CKAP2	4.10114	0.447744	4.11114e-05	9.90637e-05	OBI1-AS1	-0.0315692	-21.9603	0.974816	0.99998
CHAT	0.818738	2.36049	0.412936	0.764696	AP000311.1	-0.51254	-0.4934	0.608273	0.947466	CHRM3	-0.235505	-0.707042	0.813817	0.999148	FGF2	0.599915	1.2317	0.548563	0.99972	AL627422.2	4.10071	4.99046	4.11879e-05	9.91684e-05	EWSAT1	-0.0315692	-22.0389	0.974816	0.99998
KLHDC7A	0.817979	0.475006	0.413369	0.765026	STPG2	-0.512615	0.166584	0.608221	0.947466	AL451007.2	-0.236313	-1.65405	0.81319	0.999148	LINC01843	0.594569	0.879809	0.552132	0.99972	SAXO1	4.08972	3.71827	4.31899e-05	0.000103905	TLCD4-RWDD3	-0.0315692	-22.0067	0.974816	0.99998
KIF3C	0.81274	0.848315	0.416367	0.770099	AL353743.2	-0.515838	-1.72942	0.605968	0.944856	PPP2R2C	-0.236322	-1.7142	0.813183	0.999148	AL139317.5	0.594103	0.684759	0.552443	0.99972	SUPT3H	4.07049	0.871799	4.69145e-05	0.000112775	AC100821.2	-0.0315692	-22.1023	0.974816	0.99998
MSR1	0.811848	0.746612	0.416879	0.770571	SGO1-AS1	-0.518524	-0.736313	0.604093	0.942423	C16orf95	-0.236328	-1.76167	0.813178	0.999148	SCAMP5	0.592139	0.123402	0.553757	0.99972	PLCL2	4.06221	2.79012	4.86099e-05	0.000116757	ADAMTS3	-0.0315692	-21.9417	0.974816	0.99998
AC104459.1	0.810073	1.42608	0.417898	0.77198	CCDC60	-0.522037	-2.63859	0.601645	0.939091	TMEM212	-0.238513	0.534305	0.811483	0.999148	AC105233.5	0.591619	1.6565	0.554106	0.99972	EPCAM-DT	4.03412	1.93039	5.48067e-05	0.000131536	AL022328.1	-0.0315692	-22.0258	0.974816	0.99998
NUPR1	0.803053	-0.231041	0.421944	0.778974	HMGA2-AS1	-0.525202	-1.03292	0.599443	0.936142	AC063944.1	-0.238649	-23.1714	0.811378	0.999148	AC011921.1	0.583762	0.750991	0.55938	0.99972	ST8SIA6	4.03269	1.34198	5.5141e-05	0.000132233	MYH15	-0.0315692	-21.9543	0.974816	0.99998
C3orf35	0.801607	0.886346	0.42278	0.780037	MEIS1-AS3	-0.529029	-2.31302	0.596785	0.932477	AC017104.1	-0.238649	-23.2141	0.811378	0.999148	ST8SIA6	0.572668	-0.00479848	0.566869	0.99972	PTPRK	4.02887	0.437095	5.60467e-05	0.000134297	KIAA2012-AS1	-0.0315692	-21.9793	0.974816	0.99998
LINC00571	0.794395	0.358183	0.426965	0.786791	SLC13A4	-0.530291	-1.55039	0.59591	0.931595	LINC01342	-0.238649	-23.2929	0.811378	0.999148	PDE3B	0.571314	2.50554	0.567787	0.99972	GAB1	4.02386	1.10184	5.72517e-05	0.000137075	AC005050.3	-0.0315692	-22.09	0.974816	0.99998
NR6A1	0.791085	0.387927	0.428894	0.789376	RPS2	-0.530766	-0.883013	0.595581	0.931565	AC013472.1	-0.239466	-0.850894	0.810744	0.999148	SMCO2	0.569933	1.49953	0.568723	0.99972	UBE2E2	4.01166	0.441759	6.02935e-05	0.000144243	AL078590.2	-0.0315692	-22.0158	0.974816	0.99998
SLC2A3	0.788538	1.50446	0.430382	0.791144	XKRX	-0.531502	-1.1448	0.595071	0.931253	LINC00299	-0.241075	-0.825161	0.809497	0.999148	DNM3	0.568259	0.283126	0.569859	0.99972	PRKN	3.99414	1.09578	6.49296e-05	0.000155087	AC011933.4	-0.0315692	-22.2456	0.974816	0.99998
SUGCT	0.787033	0.809305	0.431263	0.792277	AC008269.1	-0.533304	-0.709216	0.593823	0.929786	RUVBL2	-0.243824	-0.277607	0.807367	0.999148	PITPNM2	0.562314	0.476847	0.573902	0.99972	LINC01170	3.98141	1.48811	6.85064e-05	0.0001635	ACKR4	-0.0315692	-22.0599	0.974816	0.99998
TNFSF13B	0.782748	1.6264	0.433775	0.795978	AC022182.1	-0.541364	-0.538083	0.588257	0.921551	SCN5A	-0.244199	-23.2011	0.807077	0.999148	AC023421.2	0.561706	0.379514	0.574316	0.99972	RORA	3.9465	1.37008	7.93014e-05	0.000188963	AC007493.2	-0.0315692	-22.0065	0.974816	0.99998
FAM3D	0.782692	1.42896	0.433808	0.795978	AC035140.1	-0.543102	-2.43694	0.58706	0.920156	AC022826.2	-0.244199	-23.1714	0.807077	0.999148	AC108752.1	0.561107	-0.04862	0.574725	0.99972	XDH	3.89513	3.30089	9.81477e-05	0.000233315	STRA8	-0.0315692	-22.0776	0.974816	0.99998
CDC14A	0.781628	-0.0739781	0.434434	0.796639	PLAC4	-0.543107	-2.37845	0.587056	0.920156	RHOXF1-AS1	-0.244708	-0.176968	0.806682	0.999148	EML5	0.558851	1.49051	0.576263	0.99972	LINC01515	3.86865	1.03122	0.00010944	0.000259952	AC012506.4	-0.0315692	-22.0318	0.974816	0.99998
AP003100.2	0.780679	1.47995	0.434991	0.797174	SPOCK3	-0.54394	-1.98909	0.586483	0.920156	AC092142.1	-0.245074	-1.10975	0.806399	0.999148	AC022098.4	0.558176	1.31635	0.576724	0.99972	PLA2G4A	3.86139	0.51966	0.000112742	0.000267584	ENTPD1	-0.0315692	-22.0805	0.974816	0.99998
STOX2	0.779282	0.0836916	0.435814	0.798194	PAG1	-0.54434	-1.62104	0.586208	0.920156	AC087857.1	-0.245077	-1.03442	0.806397	0.999148	ALG13-AS1	0.551594	0.552762	0.581226	0.99972	HLA-DRA	3.85503	0.699486	0.000115717	0.000274428	AC016576.1	-0.0315692	-21.9576	0.974816	0.99998
AC098484.4	0.773101	0.610505	0.439462	0.803405	PRSS54	-0.544771	-1.44428	0.585911	0.920156	ALDH16A1	-0.245808	-2.35722	0.805831	0.999148	AKAP12	0.5506	0.167544	0.581908	0.99972	TSPAN11	3.84773	4.54756	0.000119219	0.00028251	AC005740.5	-0.0315692	-22.0582	0.974816	0.99998
LINC00534	0.771571	0.705876	0.440369	0.804571	MASP1	-0.544771	-1.51624	0.585911	0.920156	AC231533.1	-0.245832	-2.76967	0.805812	0.999148	WDR11-AS1	0.549354	1.65138	0.582763	0.99972	LINC01376	3.84317	1.47094	0.000121457	0.000287586	AL450992.4	-0.0315692	-22.099	0.974816	0.99998
KCNH8	0.761373	1.75346	0.446434	0.814653	PIK3IP1-AS1	-0.545529	-1.22618	0.585389	0.920156	SST	-0.245862	-3.22652	0.805789	0.999148	AC129507.2	0.544919	0.762476	0.585809	0.99972	CBLB	3.83488	0.39903	0.000125625	0.000297219	AC009509.2	-0.0315692	-22.041	0.974816	0.99998
AC093827.5	0.760926	0.407493	0.446701	0.814653	AC107032.2	-0.546237	-0.901971	0.584903	0.920141	LINC01697	-0.247352	0.248498	0.804636	0.999148	CSTA	0.538447	-0.227377	0.590268	0.99972	STAG1	3.83178	0.427062	0.000127219	0.000300755	AP000676.5	-0.0325702	-0.463994	0.974017	0.99998
AL359636.2	0.758629	1.9098	0.448075	0.816349	LINC01355	-0.546602	-0.833952	0.584652	0.920141	MYRIP	-0.247419	-1.81292	0.804584	0.999148	PLS3-AS1	0.537004	1.45585	0.591265	0.99972	IGSF10	3.80734	4.63844	0.00014047	0.000331819	AL021918.4	-0.0330041	-22.0915	0.973671	0.99998
ZSWIM5	0.75846	1.11353	0.448176	0.816349	AC015631.1	-0.548731	-0.720668	0.58319	0.918409	SLFNL1	-0.249012	-1.35331	0.803351	0.999148	H4C4	0.536353	1.09572	0.591715	0.99972	CPEB3	3.80574	1.66803	0.000141383	0.000333714	SYT1	-0.0330041	-22.3113	0.973671	0.99998
GNG12-AS1	0.740289	0.679613	0.459125	0.834773	AKR1B10	-0.549707	-2.87369	0.58252	0.917837	AC002553.2	-0.249749	-23.2629	0.802782	0.999148	CA12	0.53472	-0.128249	0.592843	0.99972	OSBPL10	3.79029	0.390402	0.000150472	0.000354886	LINC00877	-0.0330041	-22.0037	0.973671	0.99998
GREB1L	0.738986	0.10809	0.459915	0.835703	AC008764.1	-0.55097	-1.79589	0.581654	0.916954	AL121899.2	-0.250356	0.058292	0.802312	0.999148	CCDC62	0.534125	0.812609	0.593255	0.99972	AC021055.1	3.78408	4.76658	0.00015428	0.000363583	AL031768.2	-0.0330041	-22.0301	0.973671	0.99998
TRH	0.736101	1.9375	0.461669	0.837875	SPX	-0.551862	-1.63454	0.581043	0.916472	AC024940.1	-0.252117	-0.671717	0.800951	0.999148	AC087280.2	0.533275	0.654155	0.593843	0.99972	AL354696.2	3.73534	2.27089	0.000187462	0.000441087	SRPX2	-0.0330041	-22.0111	0.973671	0.99998
AC011379.2	0.734401	0.801407	0.462704	0.839192	AC025244.1	-0.555865	-24.2117	0.578303	0.91263	AC026464.3	-0.252984	-2.06666	0.80028	0.999148	PDZRN3	0.531486	-0.0330853	0.595082	0.99972	NCAPH	3.73468	0.727961	0.000187954	0.000441897	GRIK1	-0.0330041	-22.1048	0.973671	0.99998
SPOCK3	0.733905	1.84183	0.463007	0.839192	ACVRL1	-0.556309	-3.94477	0.577999	0.91263	GPC5-AS1	-0.254564	-1.39178	0.79906	0.999148	CDK5R1	0.530546	0.861164	0.595734	0.99972	TTLL11	3.72196	1.75781	0.000197679	0.000464398	AL136038.5	-0.0330041	-22.0488	0.973671	0.99998
PTPDC1	0.733532	0.133975	0.463234	0.839192	AC112722.1	-0.556504	-0.367805	0.577867	0.91263	AC087286.2	-0.25457	-1.42887	0.799055	0.999148	AC009226.1	0.530419	0.242387	0.595821	0.99972	LONRF2	3.71471	0.399361	0.000203438	0.000477553	AL445928.2	-0.0330041	-22.1425	0.973671	0.99998
MTCL1	0.729477	0.921199	0.46571	0.842152	LACTB2-AS1	-0.557598	-2.1234	0.577119	0.912201	KCNN2	-0.255299	-23.273	0.798492	0.999148	ARHGAP31	0.529043	0.977943	0.596776	0.99972	ANKAR	3.69883	1.33548	0.000216593	0.00050764	AC010326.3	-0.0330041	-22.1517	0.973671	0.99998
AL049869.3	0.727692	0.779526	0.466802	0.843619	PGM5	-0.558005	-1.87056	0.576841	0.912201	BASP1-AS1	-0.25615	-1.14857	0.797835	0.999148	LMNB1-DT	0.524251	1.971	0.600104	0.99972	AL157931.1	3.69715	1.41396	0.00021803	0.000510608	AL161430.1	-0.0330041	-22.2225	0.973671	0.99998
AC009061.2	0.724598	0.420522	0.468699	0.846536	GPC6	-0.559778	-1.33542	0.575631	0.910809	TSNAX-DISC1	-0.256183	-1.09463	0.797809	0.999148	AC004771.3	0.523145	0.666199	0.600873	0.99972	PTBP2	3.69464	0.631601	0.000220197	0.000515282	AL592156.1	-0.0330041	-22.1249	0.973671	0.99998
STX16-NPEPL1	0.72096	1.17265	0.470934	0.850061	ZSWIM5	-0.561367	-0.811862	0.574548	0.909574	AQP7	-0.257662	-0.766459	0.796668	0.999148	ARHGAP24	0.519527	0.659947	0.603394	0.99972	DIP2C	3.68161	0.546394	0.000231761	0.000541777	SEC16B	-0.0330041	-22.0279	0.973671	0.99998
MMADHC-DT	0.717166	1.26807	0.473271	0.853767	AC079921.1	-0.56195	-0.538533	0.57415	0.909425	AC025178.2	-0.257725	-0.931358	0.796619	0.999148	ERBB4	0.516977	-0.237057	0.605172	0.99972	LAMA2	3.68134	1.47019	0.000232008	0.000541777	SHANK2-AS1	-0.0330041	-22.1927	0.973671	0.99998
SEMA6A-AS1	0.708923	0.763453	0.478372	0.861415	ELMO1	-0.563359	-0.401504	0.57319	0.908384	FSIP2-AS1	-0.257766	-1.00903	0.796588	0.999148	NR3C2	0.514788	0.323845	0.606701	0.99972	SOX5	3.68129	0.914038	0.000232061	0.000541777	AL135818.1	-0.0330041	-22.0701	0.973671	0.99998
DPH6-DT	0.707305	0.751243	0.479377	0.862706	TVP23A	-0.564217	-2.57651	0.572606	0.907938	FAM155A	-0.258522	-1.72776	0.796004	0.999148	AC008758.5	0.510893	0.397686	0.609426	0.99972	RAPGEF4	3.68012	3.08127	0.000233125	0.000543838	AL137129.1	-0.0330041	-22.1022	0.973671	0.99998
TOX	0.70645	0.407809	0.479908	0.863145	CDH23	-0.56543	-1.67792	0.571781	0.90711	TCN1	-0.258547	-2.0489	0.795985	0.999148	AP006545.3	0.509923	1.38323	0.610105	0.99972	HMGA1P4	3.67288	2.01647	0.000239835	0.000558621	SLC5A2	-0.0330732	-0.961913	0.973616	0.99998
SFTA2	0.704033	-0.0905841	0.481412	0.864851	AC010168.1	-0.566966	-1.07204	0.570738	0.905933	AL157829.1	-0.259211	-0.631705	0.795472	0.999148	KIF3C	0.50987	0.655355	0.610143	0.99972	SFN	3.66984	0.444018	0.000242706	0.00056487	C3orf35	-0.034015	-0.404956	0.972865	0.99998
AKAP12	0.703847	0.113167	0.481528	0.864851	RGS17	-0.57125	-2.61559	0.56783	0.901795	LINC02730	-0.259989	-0.207692	0.794872	0.999148	AL096803.2	0.507924	0.904435	0.611507	0.99972	RPTOR	3.66581	0.783184	0.000246554	0.00057338	CCDC62	-0.0341137	-0.502108	0.972787	0.99998
MIR181A1HG	0.703535	0.672539	0.481722	0.864851	AC131953.2	-0.57126	-2.54471	0.567823	0.901795	PRKCQ	-0.262465	-2.76148	0.792963	0.999148	AC011346.1	0.507543	0.535868	0.611774	0.99972	DANT2	3.65699	0.531228	0.000255197	0.000593022	AC092653.1	-0.0344391	-22.1798	0.972527	0.99998
AC009226.1	0.700341	0.177255	0.483714	0.86739	AL359636.2	-0.571641	-2.17012	0.567565	0.901795	AP000688.1	-0.262471	-3.03339	0.792958	0.999148	SGO1-AS1	0.506212	0.935107	0.612708	0.99972	DUOX2	3.65163	4.1458	0.000260586	0.000605077	ATP8A2	-0.0344391	-22.1338	0.972527	0.99998
IKZF2	0.69982	0.0510041	0.48404	0.867455	AC067930.4	-0.571644	-2.03045	0.567563	0.901795	AC022335.1	-0.262483	-3.21449	0.792949	0.999148	AP000311.1	0.504384	0.903697	0.613992	0.99972	LINC00639	3.64169	3.79164	0.000270856	0.000628436	POU3F1	-0.0344391	-22.2075	0.972527	0.99998
RAMP1	0.696908	-0.127556	0.485861	0.869679	AC099845.1	-0.571654	-2.1901	0.567556	0.901795	DNAH5	-0.263032	0.445283	0.792526	0.999148	RBM14-RBM4	0.503859	0.282134	0.61436	0.99972	FNDC3B	3.63331	0.458509	0.000279813	0.000648716	AC008277.1	-0.0344391	-22.2998	0.972527	0.99998
LINC00882	0.694038	0.0763731	0.487658	0.872376	AC048382.2	-0.572455	-1.59056	0.567014	0.901795	PGM5	-0.263773	-0.363382	0.791955	0.999148	AL139384.1	0.501726	0.269268	0.61586	0.99972	DUOXA2	3.60847	2.95524	0.000308002	0.000713519	AC010531.5	-0.0344391	-22.1953	0.972527	0.99998
CHODL	0.693376	1.18182	0.488074	0.872599	CLNK	-0.577419	-4.12391	0.563656	0.898018	HHLA2	-0.263891	0.242831	0.791864	0.999148	AC107223.1	0.501657	1.22695	0.615909	0.99972	LINC01473	3.60232	1.03815	0.000315389	0.000730068	AF130359.1	-0.0344391	-22.2087	0.972527	0.99998
NRG1	0.691529	0.852812	0.489233	0.874151	SLC5A2	-0.578263	-2.35773	0.563086	0.897587	SGIP1	-0.26479	-0.867679	0.791171	0.999148	AC087294.1	0.501105	0.439523	0.616297	0.99972	AC007000.4	3.59848	1.20393	0.00032008	0.000740354	LY86	-0.0344391	-22.1461	0.972527	0.99998
AC010636.2	0.689766	1.11743	0.490342	0.875357	CSTF3-DT	-0.57908	-1.88419	0.562535	0.897185	CCDC153	-0.264923	0.476678	0.791069	0.999148	C4orf3	0.501079	1.17448	0.616315	0.99972	ADCY9	3.58765	1.0958	0.000333666	0.000771184	RARB	-0.0344391	-22.3131	0.972527	0.99998
SLC4A4	0.68767	2.02386	0.49166	0.8764	TNFSF13B	-0.57908	-1.84859	0.562535	0.897185	AC021236.1	-0.26563	-1.30241	0.790524	0.999148	SPDYE1	0.499338	1.08861	0.617541	0.99972	AL357673.2	3.56504	5.56588	0.000363795	0.000840173	LINC02334	-0.0344391	-22.1552	0.972527	0.99998
AC007040.2	0.681888	0.966425	0.49531	0.882381	AC114778.2	-0.579502	-1.76818	0.56225	0.897185	AC008770.2	-0.266399	-23.4278	0.789932	0.999148	KANSL1L-AS1	0.495907	0.609324	0.61996	0.99972	SLC2A13	3.5614	2.17943	0.000368879	0.00085126	ANK2-AS1	-0.0344391	-22.2048	0.972527	0.99998
SOX2-OT	0.670349	0.757338	0.502636	0.894369	SLC17A3	-0.580023	-1.77053	0.561899	0.897185	AL354822.1	-0.266399	-23.482	0.789932	0.999148	AC024145.1	0.495713	1.27774	0.620097	0.99972	AC007611.1	3.55763	3.17442	0.000374216	0.000862912	AC027243.4	-0.0344391	-22.1125	0.972527	0.99998
C2	0.665657	0.86991	0.50563	0.898632	MDS2	-0.584462	-4.16841	0.558909	0.893302	AC008892.1	-0.266399	-23.31	0.789932	0.999148	AC107959.2	0.493339	1.81332	0.621773	0.99972	AC022182.1	3.5571	3.94256	0.000374969	0.000863985	RRH	-0.0344391	-22.1228	0.972527	0.99998
AC010197.1	0.658886	1.41605	0.509969	0.904851	SBSN	-0.584997	-3.62003	0.558549	0.893203	AC011477.3	-0.267247	-1.13457	0.789279	0.999148	DAPP1	0.49199	-0.220735	0.622726	0.99972	RANBP17	3.5498	0.574043	0.000385525	0.000887625	AC090607.1	-0.0344391	-22.0724	0.972527	0.99998
SFTPD	0.65637	1.43296	0.511586	0.905713	AC104187.1	-0.585293	-2.5628	0.558351	0.893203	AL049828.2	-0.267262	-1.2053	0.789268	0.999148	AL049869.3	0.484675	0.671856	0.627907	0.99972	ARL14	3.53271	4.51508	0.000411327	0.000944856	AC092120.3	-0.0344391	-22.2772	0.972527	0.99998
AC048382.2	0.655857	1.30382	0.511916	0.905713	AL445250.1	-0.585296	-2.49614	0.558349	0.893203	LMNB1-DT	-0.268001	-2.67796	0.788698	0.999148	SATB2	0.482316	0.632294	0.629581	0.99972	SCAF8	3.51845	0.472603	0.000434081	0.000996361	MEI1	-0.0344391	-22.0822	0.972527	0.99998
AP001011.2	0.655432	0.524132	0.51219	0.905713	RAET1G	-0.585791	-2.43209	0.558016	0.893203	TMEM170A	-0.268007	-2.71426	0.788694	0.999148	SCN5A	0.481795	2.22955	0.629951	0.99972	ABLIM3	3.51443	1.911	0.000440694	0.00100956	AL391863.1	-0.0344391	-22.1627	0.972527	0.99998
ZNRF2	0.655211	0.378643	0.512332	0.905713	SPDYE17	-0.58714	-0.117473	0.55711	0.892804	GJB4	-0.268738	-0.837977	0.788131	0.999148	AC120193.1	0.479859	0.482645	0.631328	0.99972	AC002074.1	3.51434	2.83655	0.000440841	0.00100956	ARMC12	-0.0344391	-22.1451	0.972527	0.99998
AC008269.1	0.649194	0.901194	0.516213	0.911501	AC021055.1	-0.587742	-1.30651	0.556706	0.892633	AC103923.1	-0.26961	-1.89801	0.78746	0.999148	AC087500.1	0.478384	-0.0206169	0.632377	0.99972	SAT1	3.47183	1.08824	0.000516933	0.00118291	AC018467.1	-0.0344391	-22.2188	0.972527	0.99998
AL591368.1	0.648084	0.900642	0.516931	0.912231	SLC5A1	-0.592792	-2.37541	0.55332	0.887679	EBF1	-0.269619	-1.97194	0.787453	0.999148	MEIS1-AS3	0.476605	1.33851	0.633643	0.99972	DNM3	3.47014	2.18898	0.000520178	0.00118943	NALCN-AS1	-0.0344391	-22.3922	0.972527	0.99998
AC053513.1	0.646703	0.643783	0.517824	0.91327	AC105036.3	-0.593158	-1.93987	0.553075	0.887679	AC103796.1	-0.270406	-0.860837	0.786848	0.999148	AL109824.1	0.475446	0.917036	0.634469	0.99972	AC093827.5	3.4457	2.21622	0.000569579	0.00129942	AC006511.5	-0.0344391	-22.076	0.972527	0.99998
FCMR	0.645754	0.64114	0.518438	0.913816	TNFRSF11B	-0.593949	-1.53804	0.552546	0.887387	RSPH9	-0.270702	0.440463	0.786621	0.999148	AL451042.1	0.47332	0.668048	0.635985	0.99972	AC007389.1	3.44276	2.24935	0.000575808	0.00131263	INSL3	-0.0344391	-22.1726	0.972527	0.99998
AC009230.1	0.641171	1.63946	0.521412	0.91744	LRRC8C-DT	-0.594702	-1.22605	0.552043	0.887053	MMP10	-0.271194	-1.54714	0.786242	0.999148	FAM71D	0.47278	1.25141	0.63637	0.99972	SCAMP5	3.43085	1.50588	0.00060169	0.00136955	RBP5	-0.0355486	-0.391561	0.971642	0.99998
ERG	0.638762	1.56733	0.522978	0.918969	CHODL	-0.595079	-1.17227	0.551791	0.887053	TSBP1-AS1	-0.271949	-23.3685	0.785661	0.999148	CRMP1	0.471384	0.944428	0.637367	0.99972	SUFU	3.41657	1.17378	0.000634144	0.00144233	AC116667.1	-0.0358741	-22.2153	0.971383	0.99998
AL359317.2	0.633066	0.752517	0.52669	0.924018	EPHA6	-0.596428	-0.825981	0.550889	0.886149	ADGRF4	-0.272723	-0.95821	0.785066	0.999148	LYZ	0.464155	0.0885709	0.642537	0.99972	AKAP6	3.40968	3.8027	0.00065039	0.00147816	FCER1G	-0.0358741	-22.3064	0.971383	0.99998
TYW1B	0.632101	0.122979	0.527321	0.924044	AC138627.1	-0.596469	-0.779507	0.550862	0.886149	AC068305.2	-0.273553	-2.64335	0.784428	0.999148	AC011476.3	0.462135	0.314725	0.643984	0.99972	S100A1	3.40705	0.986131	0.000656689	0.00149134	AC090907.1	-0.0358741	-22.1448	0.971383	0.99998
AL078459.1	0.624248	0.158486	0.532465	0.930279	DLGAP4-AS1	-0.598196	-0.422081	0.549709	0.8852	NPIPB12	-0.273562	-2.81103	0.784421	0.999148	PPIL6	0.462082	-0.167254	0.644023	0.99972	PCAT1	3.39032	1.24168	0.000698101	0.00158419	NELL2	-0.0358741	-22.1673	0.971383	0.99998
UFL1-AS1	0.62414	0.331089	0.532536	0.930279	SFTPD	-0.60019	-2.01915	0.548379	0.883533	AC127526.1	-0.27494	-0.422737	0.783362	0.999148	AL731577.2	0.453072	0.547134	0.650497	0.99972	COL28A1	3.38936	3.16254	0.000700552	0.00158855	AL512785.2	-0.0358741	-22.2957	0.971383	0.99998
MTMR7	0.623829	0.509022	0.53274	0.930279	AC104459.1	-0.601324	-1.34208	0.547624	0.88279	CACNB2	-0.275135	-1.72316	0.783212	0.999148	S100A1	0.452256	-0.125575	0.651085	0.99972	AC005487.1	3.38163	4.12506	0.000720569	0.00163148	USP12-AS2	-0.0358741	-22.2767	0.971383	0.99998
FOXO1	0.618284	-0.184977	0.536388	0.935425	AC087294.1	-0.607822	-0.166389	0.543306	0.8763	POF1B	-0.275154	-1.93765	0.783198	0.999148	AC116362.1	0.45084	0.000184332	0.652105	0.99972	IKZF2	3.36164	1.74639	0.000774816	0.00175298	AC116158.3	-0.0358741	-22.23	0.971383	0.99998
CCDC40	0.617929	-0.204667	0.536622	0.935425	LINC01088	-0.608745	-1.23186	0.542693	0.875783	MINAR1	-0.27516	-2.04414	0.783193	0.999148	AC105036.3	0.450818	1.06377	0.65212	0.99972	LINC01843	3.3595	3.64482	0.000780845	0.00176529	AC012443.2	-0.0358741	-22.1672	0.971383	0.99998
UNC79	0.612539	0.0919651	0.540181	0.941082	AC008629.1	-0.609791	-1.01804	0.542	0.875135	GAST	-0.275181	-2.13462	0.783177	0.999148	H4C1	0.449274	3.24993	0.653234	0.99972	AC012593.1	3.35101	0.837281	0.000805182	0.00181893	F5	-0.0358741	-22.1518	0.971383	0.99998
SPDYE17	0.60794	0.297833	0.543227	0.94584	AC105450.1	-0.611439	-0.654917	0.540909	0.873843	M1AP	-0.276727	-1.42417	0.78199	0.999148	FGF12	0.448675	-0.0250165	0.653666	0.99972	KLF12	3.3419	0.703543	0.000832076	0.00187828	AL133480.1	-0.0358741	-22.2324	0.971383	0.99998
AL359762.3	0.606886	0.452731	0.543927	0.946508	AL359762.3	-0.613677	-0.334747	0.539428	0.871921	KCNIP4	-0.277499	-23.3635	0.781397	0.999148	STAM-AS1	0.443784	1.30322	0.657198	0.99972	LINC00635	3.33822	3.01231	0.000843159	0.00190186	DKK2	-0.0358741	-22.4218	0.971383	0.99998
LINC01409	0.60211	0.32502	0.547101	0.950929	FAM3D	-0.614279	-2.18739	0.539031	0.871748	SOD2	-0.277499	-23.3702	0.781397	0.999148	NCKAP5	0.442104	0.276827	0.658414	0.99972	NETO2	3.33638	2.34279	0.00084878	0.0019131	BICRA-AS1	-0.0358741	-22.1929	0.971383	0.99998
MUC4	0.600644	-0.287634	0.548077	0.952074	LINC02646	-0.615397	-1.45863	0.538293	0.871024	MASP2	-0.277499	-23.459	0.781397	0.999148	AL359878.1	0.437591	0.687644	0.661683	0.99972	LDLR	3.33526	0.509274	0.000852212	0.0019194	AC013468.1	-0.0358741	-22.2372	0.971383	0.99998
HMGA1P4	0.59872	0.0796749	0.54936	0.95375	STXBP5-AS1	-0.616464	-1.01855	0.537588	0.870353	AP003174.1	-0.279101	-2.51077	0.780167	0.999148	AC008764.1	0.43355	1.09444	0.664615	0.99972	H4C4	3.33318	4.35428	0.000858596	0.00193232	GMFG	-0.0358741	-22.2124	0.971383	0.99998
AC087294.1	0.595474	0.403195	0.551527	0.955852	AKT3	-0.617529	-0.779295	0.536886	0.869686	AL353576.1	-0.279107	-2.84906	0.780162	0.999148	LINC00571	0.431442	0.223371	0.666147	0.99972	TRPV4	3.33247	3.06732	0.000860777	0.00193578	CECR2	-0.0358741	-22.3164	0.971383	0.99998
C2orf92	0.588102	0.525302	0.556464	0.96364	CNTN5	-0.6209	-2.28993	0.534665	0.866557	NCCRP1	-0.279113	-3.09189	0.780158	0.999148	AC139530.3	0.431361	2.32871	0.666206	0.99972	ZNF235	3.30092	1.62794	0.000963669	0.00216393	SLC26A5	-0.0362587	0.111455	0.971076	0.99998
SYNGAP1-AS1	0.585118	0.515045	0.558468	0.966208	RPS29	-0.622651	-2.01176	0.533514	0.865157	AC021055.1	-0.279289	-0.175627	0.780023	0.999148	MYRFL	0.426197	0.254446	0.669965	0.99972	SCN4B	3.29555	4.5534	0.000982275	0.00220241	SPOCK3	-0.0365053	0.140712	0.970879	0.99998
AC027808.1	0.580136	0.672615	0.561823	0.969775	AC078785.1	-0.624125	-0.885603	0.532546	0.864055	AC107959.2	-0.280713	-1.97904	0.778931	0.999148	RHBDL3	0.425856	2.82646	0.670213	0.99972	HES1	3.28623	0.395811	0.00101539	0.00227497	AC067930.4	-0.036811	-0.473419	0.970636	0.99998
TRERF1	0.57957	-0.0797768	0.562205	0.969876	SPDYE2	-0.62631	-0.483382	0.531112	0.862194	AC097634.4	-0.280728	-2.11712	0.778919	0.999148	CHL1	0.422783	0.211507	0.672453	0.99972	SCGB2B2	3.27821	1.73937	0.00104467	0.00233882	EYS	-0.0372548	-0.901462	0.970282	0.99998
STK32A	0.576596	1.09695	0.564213	0.97278	KCNB1	-0.630532	-1.06855	0.528347	0.85817	AL356488.2	-0.282267	-1.41781	0.777739	0.999148	AP002336.2	0.420305	0.433021	0.674263	0.99972	ABCA12	3.27652	2.61399	0.00105094	0.00235109	AL354710.2	-0.037309	-22.1266	0.970239	0.99998
ENOX1	0.571681	0.715025	0.567538	0.977391	LINC01132	-0.634118	-3.19058	0.526004	0.854827	AP000943.2	-0.282282	-1.45676	0.777727	0.999148	DLGAP4-AS1	0.419319	0.584562	0.674983	0.99972	TUBA1C	3.26867	1.01618	0.00108054	0.00241551	A2M	-0.037309	-22.2375	0.970239	0.99998
AF165147.1	0.567298	0.231941	0.570512	0.980488	FMN2	-0.637882	-0.929601	0.523551	0.851302	AP000317.2	-0.283836	-1.13291	0.776536	0.999148	PTCHD4	0.41906	0.140153	0.675172	0.99972	AC127526.2	3.26741	3.77493	0.00108536	0.00242448	MORC2-AS1	-0.037309	-22.1906	0.970239	0.99998
AC004160.1	0.567103	0.838168	0.570644	0.980488	C2	-0.638235	-0.978746	0.523321	0.851302	AC093898.1	-0.284662	-2.81676	0.775903	0.999148	AC006299.1	0.417633	0.494486	0.676216	0.99972	ST8SIA1	3.26213	4.5089	0.00110577	0.00246824	AC026254.2	-0.037309	-22.1802	0.970239	0.99998
AC005532.1	0.563535	1.55029	0.573071	0.983531	AC011379.2	-0.639049	-0.894244	0.522791	0.850989	NID2	-0.287425	-0.29917	0.773787	0.999148	MAK	0.417053	-0.222201	0.67664	0.99972	ZNF407	3.25585	0.777825	0.00113051	0.00252159	AC017002.4	-0.037309	-22.1925	0.970239	0.99998
AC026167.1	0.557407	1.15636	0.57725	0.990137	AL157392.3	-0.639176	-0.758424	0.522709	0.850989	AC009542.1	-0.287818	-1.46709	0.773486	0.999148	IFITM3	0.414769	1.61989	0.678311	0.99972	AC009226.1	3.24753	2.05388	0.00116412	0.00259462	AP001831.1	-0.037309	-22.3349	0.970239	0.99998
CCDC62	0.556596	0.667348	0.577804	0.99052	SERPINF1	-0.641591	-2.7821	0.521139	0.849221	SLC8A1	-0.287839	-1.47616	0.77347	0.999148	CXorf58	0.410612	0.233664	0.681357	0.99972	AC093865.1	3.23126	3.21493	0.00123244	0.00274485	AL589740.1	-0.037309	-22.2845	0.970239	0.99998
AC129507.2	0.555612	0.694134	0.578476	0.991107	SIAH2-AS1	-0.642725	-1.7301	0.520403	0.848483	AC131934.1	-0.287842	-1.52178	0.773467	0.999148	ZSWIM5	0.410198	0.705482	0.68166	0.99972	AC092647.5	3.22982	3.42593	0.00123866	0.00275666	AC096746.1	-0.037309	-22.227	0.970239	0.99998
PLB1	0.552159	0.22188	0.580839	0.994588	AP003100.2	-0.642738	-1.69749	0.520394	0.848483	GRAMD1B	-0.288375	-0.503082	0.77306	0.999148	AP000866.2	0.410052	2.42459	0.681767	0.99972	AL050309.1	3.19713	0.784475	0.00138804	0.00308454	AL672310.1	-0.037309	-22.214	0.970239	0.99998
NR3C2	0.541334	0.242015	0.588278	0.999942	AC090844.2	-0.644184	-1.25882	0.519456	0.847861	CXCL14	-0.288599	-23.5704	0.772888	0.999148	FGF21	0.409652	1.71541	0.682061	0.99972	TOX	3.19458	2.43351	0.00140033	0.00310955	SCUBE3	-0.037309	-22.2238	0.970239	0.99998
GAST	0.540663	1.93982	0.58874	0.999942	ENOX1	-0.644937	-1.02979	0.518968	0.847526	LINC02680	-0.288599	-23.642	0.772888	0.999148	DPP4	0.408376	-0.200993	0.682997	0.99972	CCSER1	3.18907	0.660464	0.00142733	0.00316716	AL691420.1	-0.037309	-22.3488	0.970239	0.99998
AC067930.4	0.536408	1.12544	0.591676	0.999942	ARHGAP24	-0.64647	-0.62632	0.517975	0.846365	TTLL7	-0.290063	0.558119	0.771768	0.999148	AP003100.2	0.407311	0.845475	0.683779	0.99972	NOS1	3.18722	1.65674	0.00143647	0.00318507	NR5A2	-0.037309	-22.1946	0.970239	0.99998
LINC01122	0.535112	0.835608	0.592572	0.999942	GRAMD1B	-0.647336	-24.4208	0.517414	0.845909	AC068533.4	-0.29021	-2.91499	0.771655	0.999148	SEC14L2	0.405342	0.410603	0.685227	0.99972	CATSPERG	3.16626	2.24117	0.00154414	0.00341877	AC026894.3	-0.037309	-22.2597	0.970239	0.99998
ARHGAP31	0.534637	0.900083	0.592901	0.999942	SPDYE5	-0.647971	-0.488011	0.517004	0.845698	XDH	-0.291346	0.117974	0.770786	0.999148	AP000317.2	0.405148	1.30582	0.685369	0.99972	AC127526.1	3.16391	4.60874	0.00155666	0.00344394	RIC3	-0.037309	-22.2596	0.970239	0.99998
Z83844.1	0.527353	1.56859	0.597949	0.999942	AC022098.4	-0.648981	-2.2763	0.516351	0.845091	KIF26B-AS1	-0.29166	0.104382	0.770546	0.999148	TMPRSS5	0.4049	1.2673	0.685551	0.99972	LAYN	3.15889	3.58182	0.00158373	0.00350125	TYROBP	-0.037309	-22.4287	0.970239	0.99998
AP002336.2	0.525051	0.259649	0.599548	0.999942	RCAN2	-0.649005	-2.33048	0.516335	0.845091	ZCCHC12	-0.291801	-2.02009	0.770439	0.999148	LRIG2-DT	0.403032	1.19486	0.686924	0.99972	AXDND1	3.1461	3.52866	0.00165462	0.00365258	AC107072.2	-0.0373929	-1.08659	0.970172	0.99998
AC002074.1	0.520542	0.392561	0.602686	0.999942	LINC01122	-0.650151	-1.50834	0.515595	0.844775	FAM95C	-0.291813	-2.05687	0.77043	0.999148	CHURC1-FNTB	0.398923	0.571714	0.68995	0.99972	SLC17A3	3.13344	4.29182	0.00172771	0.00380833	ZNF559-ZNF177	-0.0380931	-0.375439	0.969613	0.99998
CRMP1	0.518373	0.912913	0.604198	0.999942	AC127526.2	-0.65232	-0.964842	0.514195	0.842942	PI16	-0.29336	-1.49088	0.769247	0.999148	MAML3	0.396732	-0.183522	0.691565	0.99972	AF117829.1	3.13275	0.336853	0.00173179	0.00381451	ARHGEF3	-0.0382903	0.0340151	0.969456	0.99998
ARMCX4	0.514593	0.703667	0.606837	0.999942	CAPN6	-0.653807	-0.768561	0.513236	0.841831	ADAM22	-0.29337	-1.36076	0.76924	0.999148	AC011479.2	0.395551	1.16462	0.692436	0.99972	LINC02649	3.11181	1.71704	0.00185944	0.00408969	AC009495.1	-0.0385073	-0.760264	0.969283	0.99998
LINC02340	0.513978	0.193604	0.607267	0.999942	AC079380.1	-0.654952	-0.520997	0.512499	0.841081	SRPK3	-0.294911	-1.13732	0.768062	0.999148	AC007262.2	0.39446	0.470891	0.693241	0.99972	AL590652.1	3.10597	1.56952	0.00189656	0.00416826	AL118556.2	-0.038744	-22.3258	0.969094	0.99998
Z97986.1	0.51352	0.987074	0.607588	0.999942	ANKRD2	-0.655642	-2.81279	0.512054	0.840812	ARL14	-0.295814	-0.166694	0.767372	0.999148	TNIK	0.392968	-0.0519599	0.694343	0.99972	PCNA	3.07876	0.307869	0.00207863	0.00456506	NCR3LG1	-0.038744	-22.387	0.969094	0.99998
AC104695.2	0.512679	0.663386	0.608176	0.999942	NID2	-0.656044	-2.38321	0.511796	0.840812	PLS3-AS1	-0.296465	-0.968618	0.766875	0.999148	VSTM5	0.392893	1.11169	0.694399	0.99972	PALM2AKAP2	3.07674	0.398548	0.00209279	0.00459281	FAM209A	-0.038744	-22.197	0.969094	0.99998
LINC01355	0.510597	0.72578	0.609633	0.999942	AL353151.2	-0.657923	-1.37451	0.510587	0.839322	SRGAP3-AS2	-0.297075	0.489331	0.76641	0.999148	SCN11A	0.38833	0.792422	0.697772	0.99972	MAP7D2	3.07614	2.63862	0.00209698	0.00459864	AL359094.1	-0.038744	-22.3129	0.969094	0.99998
KANSL1L-AS1	0.510007	0.446373	0.610046	0.999942	UPP2	-0.667641	-0.696689	0.504363	0.829544	PTPN20	-0.297345	-1.92956	0.766203	0.999148	ERG	0.386736	1.012	0.698951	0.99972	MDS2	3.0638	5.08338	0.00218547	0.00478919	AC116552.1	-0.038744	-22.3401	0.969094	0.99998
TMEM72-AS1	0.50277	0.530243	0.615126	0.999942	C3orf35	-0.668071	-0.716249	0.504088	0.829544	LINC02026	-0.298897	-1.42255	0.765019	0.999148	AL365295.1	0.385062	0.0784347	0.700191	0.99972	ADAMTSL4-AS1	3.05339	2.02534	0.00226269	0.00495118	CLEC6A	-0.038744	-22.2418	0.969094	0.99998
AL356488.2	0.497463	1.41139	0.618863	0.999942	KANSL1L-AS1	-0.669212	-0.458199	0.50336	0.828804	LINC00907	-0.299699	-23.6297	0.764407	0.999148	AC112206.2	0.38101	0.575461	0.703196	0.99972	SYT14	3.04583	0.823043	0.0023204	0.00507375	RHBDL3	-0.038744	-22.2582	0.969094	0.99998
ZSCAN5A	0.493092	-0.079147	0.621948	0.999942	STEAP4	-0.671751	-1.78585	0.501742	0.826594	C4orf36	-0.299699	-23.4578	0.764407	0.999148	CCR7	0.380213	0.75856	0.703787	0.99972	FRMD5	3.04557	1.39705	0.00232243	0.00507451	AC007938.3	-0.038744	-22.3183	0.969094	0.99998
MMP10	0.492046	1.46539	0.622687	0.999942	AL096803.2	-0.671948	-1.37723	0.501617	0.826594	CFAP97D2	-0.302332	0.521489	0.762399	0.999148	AC026347.2	0.377249	0.256781	0.705988	0.99972	AC099845.1	3.03137	4.59036	0.00243449	0.00531548	AL139106.1	-0.038744	-22.4387	0.969094	0.99998
MINAR1	0.491551	1.69159	0.623037	0.999942	AC005480.1	-0.672616	-1.08372	0.501192	0.826594	SPNS3	-0.303651	0.23557	0.761394	0.999148	CST3	0.376384	1.85633	0.706632	0.99972	PCED1B	3.02552	0.720153	0.00248209	0.00541547	LINC01876	-0.038813	-1.14959	0.969039	0.99998
AC138028.2	0.490126	1.16314	0.624045	0.999942	NMUR2	-0.672645	-1.20022	0.501173	0.826594	LINC02666	-0.303733	-1.02711	0.761331	0.999148	AC006008.1	0.371416	0.56463	0.710327	0.99972	AC010997.3	3.02379	1.62584	0.0024963	0.00544252	AC093865.1	-0.0392174	-0.803264	0.968717	0.99998
ANKRD2	0.483466	0.951688	0.628765	0.999942	ST8SIA1	-0.677492	-2.06222	0.498094	0.822389	AC093523.2	-0.304488	-1.53242	0.760756	0.999148	AC053513.1	0.367046	0.419814	0.713584	0.99972	BIRC3	3.01664	0.268458	0.0025559	0.00556842	BTLA	-0.0395132	-0.163741	0.968481	0.99998
SLFNL1	0.481649	1.53188	0.630056	0.999942	AL357673.2	-0.682518	-24.5329	0.494912	0.817585	AL445250.1	-0.305047	-0.681143	0.76033	0.999148	GNG12-AS1	0.366512	0.275718	0.713983	0.99972	IFIT2	2.99368	0.666357	0.00275633	0.00599202	AC068491.2	-0.040179	-22.4693	0.96795	0.99998
TFF1	0.481124	0.0270443	0.630428	0.999942	AL139317.5	-0.683395	-0.339752	0.494357	0.81712	CHAT	-0.306017	-1.34445	0.759592	0.999148	SLC25A21	0.364402	1.16848	0.715558	0.99972	LINC02340	2.99178	2.06452	0.00277359	0.00602517	AL109761.1	-0.040179	-22.321	0.96795	0.99998
AC092574.2	0.479458	0.746318	0.631613	0.999942	TSPAN11	-0.685706	-1.65032	0.492898	0.815157	AC008758.1	-0.306136	-1.39801	0.759501	0.999148	KRT13	0.364118	0.0926318	0.71577	0.99972	CRYAB	2.97947	1.09096	0.00288752	0.00626813	LINC02201	-0.040179	-22.4249	0.96795	0.99998
SCGB2B2	0.477269	-0.0710503	0.63317	0.999942	LINC00265	-0.68675	-1.1757	0.49224	0.814518	AL008633.1	-0.306865	-3.27937	0.758946	0.999148	AL450998.3	0.361338	2.02321	0.717847	0.99972	TNRC6C	2.97606	0.793939	0.00291973	0.00633348	CPXCR1	-0.040179	-22.3993	0.96795	0.99998
STAC	0.474976	1.08763	0.634804	0.999942	AC112206.2	-0.687905	-0.98008	0.491513	0.813763	AC012629.2	-0.308423	-1.95754	0.75776	0.999148	CR1	0.358567	0.539262	0.719919	0.99972	SPART-AS1	2.96218	3.09753	0.00305472	0.00661857	AC012076.2	-0.040179	-22.447	0.96795	0.99998
ZNF503	0.471343	0.899736	0.637396	0.999942	ARL14	-0.692008	-1.99162	0.488932	0.809938	BTG4	-0.309643	0.061628	0.756833	0.999148	AC011405.1	0.358066	0.950786	0.720294	0.99972	PLAC4	2.96035	4.78063	0.0030729	0.0066513	TAGLN3	-0.040179	-22.384	0.96795	0.99998
EREG	0.470756	0.111357	0.637815	0.999942	AL627422.2	-0.692342	-1.79063	0.488723	0.809938	AC011773.4	-0.311555	-1.25573	0.755379	0.999148	NMUR2	0.353714	0.58008	0.723553	0.99972	GAB2	2.95979	0.643178	0.00307853	0.00665867	PKIA-AS1	-0.040179	-22.358	0.96795	0.99998
AC211433.1	0.468072	0.722291	0.639733	0.999942	KCND3	-0.693015	-1.43142	0.4883	0.809784	TMLHE-AS1	-0.311686	-1.36507	0.755279	0.999148	AL353151.2	0.353403	0.73582	0.723787	0.99972	AC009879.4	2.95865	2.6807	0.00308994	0.00667855	ARHGAP28	-0.040179	-22.4366	0.96795	0.99998
AC011921.1	0.466766	0.43981	0.640667	0.999942	AC025048.4	-0.698203	-2.35153	0.48505	0.80484	C11orf16	-0.312384	0.451132	0.754748	0.999148	TNFSF10	0.352643	-0.083859	0.724356	0.99972	CTPS2	2.95596	0.29428	0.00311695	0.00673208	BRWD1-AS1	-0.040179	-22.271	0.96795	0.99998
AP000676.5	0.466709	0.890601	0.640708	0.999942	AC128687.2	-0.698214	-2.41847	0.485043	0.80484	AC003006.1	-0.312419	-3.15776	0.754722	0.999148	AC021086.1	0.351821	0.842138	0.724972	0.99972	PRR26	2.93312	3.23206	0.00335571	0.00724255	AL606516.1	-0.040179	-22.488	0.96795	0.99998
2024-12-01	0.466047	0.124827	0.641182	0.999942	TM4SF4	-0.704855	-2.92777	0.480901	0.798838	CACNA2D3	-0.313994	-2.12406	0.753525	0.999148	AL365356.1	0.350936	0.626442	0.725637	0.99972	ACVRL1	2.93212	5.31539	0.00336659	0.00726081	F2RL3	-0.040179	-22.4533	0.96795	0.99998
AL451042.1	0.465392	0.54409	0.641651	0.999942	AC139530.2	-0.705223	-2.28538	0.480671	0.798838	AL592295.3	-0.31556	-1.68064	0.752336	0.999148	SLCO1B3-SLCO1B7	0.34752	0.276873	0.7282	0.99972	AKR1C2	2.93116	3.7412	0.003377	0.00727801	VEGFD	-0.040179	-22.3401	0.96795	0.99998
DSE	0.464814	-0.0355662	0.642065	0.999942	CRACD	-0.706635	-0.0458808	0.479793	0.797882	SLC25A21	-0.315563	-1.56027	0.752334	0.999148	AC017083.3	0.347459	0.783228	0.728246	0.99972	TENM4	2.91879	0.466945	0.00351397	0.00756777	AL133464.1	-0.040179	-22.2858	0.96795	0.99998
SATB2	0.461883	0.532755	0.644166	0.999942	AL157400.3	-0.707091	-1.41807	0.47951	0.797854	AC066613.2	-0.317102	-1.16807	0.751166	0.999148	AC104695.2	0.342143	0.567837	0.732243	0.99972	UBASH3B	2.91788	0.903582	0.00352423	0.00758442	CMTM2	-0.040179	-22.317	0.96795	0.99998
AC090673.1	0.461573	0.698646	0.644388	0.999942	SCN4B	-0.71111	-4.50145	0.477016	0.794145	AL645465.1	-0.318738	-1.17174	0.749925	0.999148	STOX2	0.340857	-0.0964903	0.733211	0.99972	ADGRL4	2.89843	1.42865	0.00375037	0.0080653	AC127024.2	-0.040179	-22.5545	0.96795	0.99998
SCG5	0.461169	0.320078	0.644677	0.999942	SLC6A14	-0.711222	-0.747554	0.476947	0.794145	AC116366.3	-0.31879	-1.25796	0.749886	0.999148	CEP250-AS1	0.340061	0.820665	0.733811	0.99972	KSR2	2.88815	1.79302	0.00387519	0.00832777	AL442003.1	-0.040179	-22.3578	0.96795	0.99998
SPDYE3	0.460415	0.189486	0.645218	0.999942	GNAS-AS1	-0.714863	-1.2972	0.474694	0.791156	RBFOX1	-0.319541	-2.22078	0.749316	0.999148	MIR193BHG	0.339881	0.246398	0.733946	0.99972	ERICH6	2.86589	3.04277	0.00415843	0.00893005	ACKR2	-0.0414758	-0.817827	0.966917	0.99998
RN7SL832P	0.459724	0.290767	0.645714	0.999942	AC008462.1	-0.716558	-0.866735	0.473647	0.78985	TVP23A	-0.320136	-0.782791	0.748865	0.999148	PAG1	0.339469	0.751829	0.734256	0.99972	PBX3	2.85046	1.05741	0.00436555	0.00936813	AC002064.3	-0.0416139	-22.3228	0.966806	0.99998
LACTB2-AS1	0.457591	1.02289	0.647246	0.999942	AC025034.1	-0.719312	-2.41955	0.471949	0.787456	AC093019.2	-0.320218	-0.900383	0.748803	0.999148	PSMD6-AS2	0.338081	0.361398	0.735302	0.99972	ZNF438	2.84813	0.979034	0.00439768	0.00943033	AL627309.1	-0.0416139	-22.4523	0.966806	0.99998
AC022098.4	0.454938	0.962227	0.649154	0.999942	AC012593.2	-0.719351	-0.414226	0.471925	0.787456	GRIP2	-0.321097	-1.62075	0.748137	0.999148	PCP4L1	0.337828	1.76866	0.735493	0.99972	HMGA2	2.84095	0.276903	0.00449793	0.00963154	AC002072.1	-0.0416139	-22.5782	0.966806	0.99998
SCN11A	0.454837	0.724798	0.649227	0.999942	EDN2	-0.720885	-1.87913	0.47098	0.786715	ANKRD18B	-0.321775	-0.774712	0.747623	0.999148	EBF1	0.337339	1.25394	0.735861	0.99972	SGIP1	2.8389	5.39003	0.00452689	0.00968665	AL451137.2	-0.0416139	-22.5346	0.966806	0.99998
PIK3IP1-AS1	0.454751	0.741062	0.649288	0.999942	PHEX	-0.723411	-0.877054	0.469427	0.784558	AP006545.1	-0.323492	-2.89916	0.746323	0.999148	KCNIP4	0.335752	1.46472	0.737058	0.99972	KCTD16	2.83842	4.00023	0.00453369	0.00969429	TEX52	-0.0416139	-22.4312	0.966806	0.99998
NTNG1	0.453577	1.33349	0.650133	0.999942	AC116345.1	-0.727139	-2.05098	0.467141	0.781172	AC011472.1	-0.323498	-2.85617	0.746318	0.999148	SPDYE17	0.335261	0.219466	0.737428	0.99972	SCGB1D2	2.82796	0.403705	0.00468462	0.0100099	AC009060.1	-0.0416139	-22.3096	0.966806	0.99998
AP001628.1	0.453182	0.732991	0.650418	0.999942	AL121899.2	-0.727519	-1.7942	0.466908	0.781172	LINC00637	-0.324189	-1.12767	0.745795	0.999148	AL359538.4	0.333979	1.79336	0.738395	0.99972	ELMOD1	2.81255	5.55394	0.00491504	0.0104947	AL391244.1	-0.0416139	-22.4162	0.966806	0.99998
AC023509.6	0.451526	0.559583	0.651611	0.999942	CPNE8	-0.728121	-1.43967	0.46654	0.781037	AC104123.1	-0.324338	-1.25671	0.745682	0.999148	LGALSL-DT	0.3317	0.44589	0.740116	0.99972	AC025244.1	2.79951	5.4274	0.00511807	0.0109205	TCF24	-0.0416139	-22.3053	0.966806	0.99998
UBE2R2-AS1	0.450015	1.22855	0.6527	0.999942	ANKRD30BL	-0.728407	-0.376976	0.466364	0.781037	AL353743.2	-0.325704	-0.754464	0.744648	0.999148	AC139019.1	0.331187	0.215718	0.740503	0.99972	ARL15	2.76236	0.78906	0.00573853	0.012227	AP001021.3	-0.0416139	-22.5192	0.966806	0.99998
AC112722.1	0.446939	0.400671	0.654919	0.999942	AC002064.2	-0.729446	-1.03775	0.465729	0.780551	DIAPH2-AS1	-0.326672	-1.62349	0.743916	0.999148	AC131953.2	0.330954	0.945452	0.740679	0.99972	TAGLN	2.75936	1.8405	0.0057915	0.0123311	ANGPTL1	-0.0416139	-22.5733	0.966806	0.99998
ADAMTS7	0.445062	1.02027	0.656275	0.999942	LGALSL-DT	-0.729476	-1.02974	0.465711	0.780551	AC009230.1	-0.326695	-1.82637	0.743898	0.999148	CD37	0.325965	1.57144	0.744451	0.99972	H1-5	2.7541	0.522096	0.00588544	0.0125222	PLAC1	-0.0416139	-22.4018	0.966806	0.99998
CDH23	0.444516	0.966131	0.65667	0.999942	C10orf53	-0.732984	-2.83185	0.463568	0.777799	BTLA	-0.32734	-0.764612	0.74341	0.999148	AC025048.4	0.32589	0.708478	0.744507	0.99972	CCDC7	2.73853	0.906331	0.00617143	0.0131214	AC073167.1	-0.0416139	-22.4353	0.966806	0.99998
AC105036.3	0.444312	0.91913	0.656817	0.999942	AKR1C2	-0.734162	-2.04829	0.46285	0.777029	MASP1	-0.32876	-0.672186	0.742337	0.999148	AP002884.2	0.322824	0.889079	0.746829	0.99972	AC138356.3	2.72775	4.65017	0.00637673	0.0135483	AC126182.3	-0.0416139	-22.3768	0.966806	0.99998
AC017083.3	0.443127	0.815748	0.657674	0.999942	SEMA6A-AS1	-0.737449	-0.85879	0.460849	0.774103	MAPK8IP2	-0.329043	-2.9176	0.742123	0.999148	PPP2R2C	0.320162	1.41446	0.748846	0.99972	PIP5K1B	2.70527	1.65222	0.00682482	0.0144901	AC018653.1	-0.0416139	-22.4238	0.966806	0.99998
TBC1D10A	0.434463	0.274566	0.663952	0.999942	ARMCX4	-0.742579	-1.39285	0.457736	0.769305	GALNT5	-0.330632	-2.24013	0.740922	0.999148	C16orf95	0.320028	1.39303	0.748947	0.99972	AC079142.1	2.70112	1.24578	0.0069106	0.0146618	PKD1L1	-0.0416139	-22.4574	0.966806	0.99998
AC087857.1	0.432844	0.880013	0.665128	0.999942	AKAP6	-0.742625	-1.3371	0.457709	0.769305	SPINK13	-0.331327	-1.02137	0.740397	0.999148	FOXO1	0.318284	-0.147816	0.750269	0.99972	SDC4	2.68758	0.298384	0.00719727	0.0152592	P4HA2-AS1	-0.0416139	-22.3666	0.966806	0.99998
CXCL14	0.431204	1.94907	0.66632	0.999942	AL591368.1	-0.742912	-1.29033	0.457535	0.769305	AC015813.8	-0.33184	-0.0928939	0.74001	0.999148	LINC00390	0.316636	1.94913	0.75152	0.99972	SLC13A4	2.68618	4.15353	0.0072275	0.0153125	AC007098.1	-0.0416139	-22.3061	0.966806	0.99998
AL109824.1	0.429271	0.616759	0.667726	0.999942	SNAP25	-0.746183	-0.559008	0.455557	0.76693	AC097448.1	-0.332184	-1.58306	0.73975	0.999148	MEI1	0.314812	2.34249	0.752905	0.99972	CLNK	2.68013	4.79305	0.00735943	0.015581	AC104335.2	-0.0416139	-22.4366	0.966806	0.99998
SPDYE5	0.429173	0.281849	0.667797	0.999942	NBPF20	-0.748862	-1.51401	0.45394	0.764638	VSTM5	-0.332215	-1.79874	0.739727	0.999148	AC025034.1	0.314191	0.66509	0.753376	0.99972	SERPINF1	2.67374	4.12584	0.00750115	0.0158699	AL365273.2	-0.0430489	-22.4546	0.965663	0.99998
MAPK8IP2	0.428477	1.4744	0.668304	0.999942	AL451042.1	-0.749918	-1.24316	0.453304	0.763996	AC026167.1	-0.332236	-1.71794	0.739711	0.999148	AC020663.5	0.31284	2.05252	0.754402	0.99972	LINC00265	2.64587	3.2557	0.00814804	0.0172021	IFITM10	-0.0430489	-22.5273	0.965663	0.99998
SOD2	0.426112	2.0057	0.670026	0.999942	AC010615.4	-0.752496	-0.728687	0.451753	0.76181	KCTD16	-0.335894	-0.602455	0.736951	0.999148	AC013468.1	0.311085	2.5352	0.755736	0.99972	NUF2	2.62916	0.382354	0.00855973	0.0180458	LINC01695	-0.0430489	-22.5659	0.965663	0.99998
HLA-G	0.421378	0.931453	0.673479	0.999942	ZNF503	-0.754062	-2.77456	0.450812	0.76065	SMCO2	-0.339283	-1.33985	0.734396	0.999148	PLCL2	0.310377	0.123285	0.756274	0.99972	OXTR	2.61742	3.83632	0.0088597	0.0186651	EPHB1	-0.0430489	-22.4889	0.965663	0.99998
AC008462.1	0.418451	0.424409	0.675618	0.999942	ADAMTSL4-AS1	-0.757392	0.0586468	0.448815	0.757707	AC010754.1	-0.341616	0.241839	0.73264	0.999148	AC092647.5	0.30935	0.330436	0.757056	0.99972	MRTFA	2.61065	0.565585	0.00903693	0.0190251	AC016597.2	-0.0430489	-22.5751	0.965663	0.99998
LINC00624	0.417853	0.569028	0.676054	0.999942	CCDC175	-0.758156	-0.880601	0.448358	0.757361	AC005410.2	-0.342369	-0.95458	0.732073	0.999148	RBM44	0.306025	0.379594	0.759586	0.99972	RN7SL832P	2.60336	1.94442	0.0092314	0.0194209	DLEU7	-0.0430489	-22.527	0.965663	0.99998
LRRC4	0.417261	0.137616	0.676487	0.999942	AC010636.2	-0.762214	-1.92319	0.445933	0.753689	WDR11-AS1	-0.343275	-1.59422	0.731391	0.999148	STXBP5-AS1	0.304045	0.532581	0.761094	0.99972	XKRX	2.59913	3.81447	0.00934597	0.0196481	MRAP	-0.0430489	-22.4431	0.965663	0.99998
PRKCE	0.417243	-0.171959	0.6765	0.999942	PHACTR1	-0.765498	-0.953017	0.443975	0.750803	ARPC3	-0.344849	-1.32786	0.730208	0.999148	RBFOX1	0.301671	0.923034	0.762903	0.99972	MAP3K14	2.5828	1.22945	0.00980013	0.0205885	C6orf47-AS1	-0.0430489	-22.4362	0.965663	0.99998
AC092338.3	0.41704	0.903717	0.676649	0.999942	AC005237.1	-0.767308	-0.719396	0.442898	0.749405	RCAN2	-0.345309	-0.605155	0.729862	0.999148	KBTBD12	0.300089	1.03617	0.764109	0.99972	AKR1B10	2.58249	4.38754	0.00980903	0.0205928	AL356421.2	-0.0430489	-22.4608	0.965663	0.99998
AC009542.1	0.414106	1.24641	0.678797	0.999942	OXTR	-0.768145	-2.98393	0.442401	0.748986	LINC02795	-0.345425	-0.728748	0.729775	0.999148	YIPF7	0.298705	1.34213	0.765165	0.99972	RNF217-AS1	2.57671	1.9338	0.00997445	0.0209254	AC244517.1	-0.0430489	-22.5922	0.965663	0.99998
AL022157.1	0.409452	1.01451	0.682208	0.999942	SLC6A12	-0.77037	-1.56445	0.44108	0.747171	AC105233.5	-0.345701	-3.07753	0.729567	0.999148	LANCL1-AS1	0.297214	0.711592	0.766303	0.99972	AL079338.1	2.55612	0.945156	0.0105847	0.0221902	AC010978.1	-0.0430489	-22.5185	0.965663	0.99998
RNF165	0.407707	0.271548	0.683489	0.999942	RHEX	-0.770454	-1.87935	0.44103	0.747171	SBSN	-0.346575	-1.43787	0.728911	0.999148	AL157392.3	0.295014	0.399143	0.767983	0.99972	OSBP2	2.55179	1.59199	0.010717	0.0224518	NOX5	-0.0430489	-22.6324	0.965663	0.99998
DOK6	0.402727	1.35533	0.687149	0.999942	NBEA	-0.777133	-0.143123	0.437081	0.741233	PIP	-0.346838	-0.0627178	0.728713	0.999148	AC008462.1	0.292683	0.381076	0.769765	0.99972	ELMO1	2.53986	2.8988	0.0110896	0.0232162	AC005154.4	-0.0430489	-22.4312	0.965663	0.99998
ABCA13	0.40155	0.107671	0.688015	0.999942	SUGCT	-0.77925	-1.00883	0.435832	0.739535	AP002884.2	-0.347285	-2.27225	0.728377	0.999148	STK32A	0.291149	0.657128	0.770938	0.99972	PIGR	2.52844	0.330956	0.0114569	0.0239517	AC015845.1	-0.0430489	-22.6253	0.965663	0.99998
CPNE8	0.401201	0.637231	0.688272	0.999942	LAYN	-0.784464	-1.77006	0.432768	0.73475	AP001160.1	-0.347858	-0.899404	0.727946	0.999148	LAX1	0.288496	1.02716	0.772967	0.99972	CNTN5	2.52528	3.90879	0.0115606	0.0241516	HPN	-0.0438231	-0.13627	0.965045	0.99998
KIAA0825	0.39884	-0.20396	0.690011	0.999942	FGF13	-0.784672	-1.47616	0.432646	0.73475	UTS2B	-0.348818	-1.61808	0.727226	0.999148	SHROOM4	0.284533	-0.0781395	0.776002	0.99972	PRSS54	2.52128	3.87902	0.011693	0.0244113	AL117334.2	-0.0444838	-22.4253	0.964519	0.99998
AL138885.3	0.398072	0.4725	0.690577	0.999942	DACH1	-0.788574	-0.604569	0.430361	0.731492	CEP250-AS1	-0.348866	-1.8466	0.72719	0.999148	RUNDC3B	0.284123	-0.139408	0.776316	0.99972	ALDH1L1-AS1	2.51157	4.84975	0.0120194	0.0250752	EDNRB-AS1	-0.0444838	-22.4787	0.964519	0.99998
CCDC148	0.396729	-0.155685	0.691567	0.999942	AC010197.1	-0.788908	-3.91488	0.430166	0.731492	HLA-G	-0.350383	-1.43308	0.726051	0.999148	LINC00159	0.283474	1.67362	0.776814	0.99972	CRTC3-AS1	2.51116	1.72002	0.0120336	0.0250873	LINC01995	-0.0444838	-22.5478	0.964519	0.99998
AC129492.1	0.396144	1.80157	0.691999	0.999942	DGAT2	-0.789245	-2.8898	0.429969	0.731492	LINC01290	-0.350475	-1.53768	0.725982	0.999148	AC024940.1	0.282571	0.969555	0.777506	0.99972	AC113414.1	2.4954	2.78528	0.0125815	0.0262115	PAK5	-0.0444838	-22.4883	0.964519	0.99998
AC139019.1	0.395271	0.348943	0.692643	0.999942	SIDT1	-0.790682	-1.78041	0.42913	0.730641	CHGA	-0.35128	-0.471014	0.725378	0.999148	AC139530.2	0.281959	0.712127	0.777975	0.99972	AC009495.1	2.49482	3.89964	0.012602	0.026236	AC104964.4	-0.0444838	-22.539	0.964519	0.99998
AC026347.2	0.394589	0.269989	0.693146	0.999942	AC008945.2	-0.792628	-1.16882	0.427995	0.729122	AC009495.1	-0.353567	-1.14899	0.723663	0.999148	UBXN10	0.280615	-0.179519	0.779006	0.99972	AC016747.4	2.47421	3.14408	0.0133532	0.0277613	AC004805.1	-0.0444838	-22.7148	0.964519	0.99998
AP003174.1	0.392349	1.45091	0.694801	0.999942	SERPINB4	-0.797919	-2.12659	0.424917	0.724291	OXTR	-0.353802	-0.516361	0.723487	0.999148	AC007040.2	0.278952	0.534929	0.780282	0.99972	CXCL1	2.46584	0.153268	0.0136691	0.0283984	NT5DC4	-0.0444838	-22.3871	0.964519	0.99998
AL592295.3	0.390223	1.08544	0.696372	0.999942	AC113414.1	-0.800411	-1.03341	0.423473	0.722239	IGSF10	-0.35515	-0.21216	0.722477	0.999148	AL136038.5	0.277897	2.26347	0.781091	0.99972	DGAT2	2.46084	3.5506	0.0138613	0.0287579	UNC13C	-0.0444838	-22.4816	0.964519	0.99998
EYS	0.388197	0.576819	0.69787	0.999942	SPDYE3	-0.803587	-0.412971	0.421635	0.719514	AC131953.2	-0.357397	-0.950239	0.720795	0.999148	ANXA13	0.277347	1.372	0.781514	0.99972	JUN	2.45366	0.208549	0.0141409	0.0292975	LINC02603	-0.0444838	-22.5293	0.964519	0.99998
DMRTA2	0.384168	2.71834	0.700854	0.999942	LINC00624	-0.805429	-1.51657	0.420572	0.718108	PRSS54	-0.360474	-0.799615	0.718493	0.999148	ACSL3-AS1	0.275862	1.85884	0.782654	0.99972	AL353151.2	2.44348	3.34835	0.0145462	0.0301164	AL451007.3	-0.0444838	-22.358	0.964519	0.99998
AL021997.3	0.381195	1.74229	0.703058	0.999942	DPH6-DT	-0.808027	-0.857013	0.419075	0.715959	AP002812.2	-0.360599	-0.907109	0.718399	0.999148	ZNF19	0.275726	0.116615	0.782758	0.99972	AC053527.2	2.42745	1.30779	0.0152052	0.0314591	RBP2	-0.0444838	-22.5009	0.964519	0.99998
AC091078.1	0.378921	1.13973	0.704747	0.999942	TTLL6	-0.809964	-3.61064	0.417961	0.714463	AC091078.1	-0.360748	-23.8781	0.718288	0.999148	LINC02614	0.275269	0.269196	0.78311	0.99972	ZNF169	2.4227	1.4139	0.0154057	0.0318519	STK32A	-0.0453517	-0.483193	0.963827	0.99998
AL359878.1	0.370702	0.430424	0.710859	0.999942	AC005487.1	-0.809977	-3.74269	0.417953	0.714463	NAV3	-0.362343	-3.19595	0.717096	0.999148	ELMO1	0.274754	0.199722	0.783505	0.99972	SLC7A2	2.41865	0.15553	0.0155781	0.0321862	LINC02683	-0.0453665	-0.410025	0.963815	0.99998
CHRM3	0.369687	0.896085	0.711616	0.999942	AC092171.3	-0.810346	-0.439508	0.417742	0.714463	AC109927.1	-0.363911	-2.26245	0.715925	0.999148	AC006547.2	0.2746	0.879674	0.783623	0.99972	CRACD	2.41247	2.1259	0.0158449	0.032715	METTL24	-0.0459188	-22.543	0.963375	0.99998
LINC02615	0.366913	0.0855684	0.713684	0.999942	IGSF10	-0.810381	-3.11058	0.417721	0.714463	STAC	-0.365478	-1.76437	0.714755	0.999148	DIAPH2-AS1	0.274509	0.790375	0.783693	0.99972	F3	2.40779	0.242887	0.0160495	0.0330924	CLDN12	-0.0459188	-22.6051	0.963375	0.99998
GRAMD1B	0.364091	0.942781	0.71579	0.999942	RBM44	-0.812418	-1.54511	0.416552	0.713681	ZSCAN1	-0.36634	-0.164757	0.714112	0.999148	AL353576.1	0.270909	0.979838	0.786461	0.99972	AC002064.2	2.40778	2.96833	0.0160498	0.0330924	AL512656.2	-0.0459188	-22.5515	0.963375	0.99998
AC137770.1	0.363063	1.04856	0.716558	0.999942	AXDND1	-0.812543	-1.64491	0.41648	0.713681	AC035140.1	-0.367006	-1.50235	0.713615	0.999148	AC097448.1	0.270333	0.771996	0.786904	0.99972	LINC00598	2.38979	2.36278	0.016858	0.0346873	CORO2B	-0.0459188	-22.5134	0.963375	0.99998
LRRC8C-DT	0.362713	0.5477	0.71682	0.999942	JPH2	-0.813038	-1.29002	0.416196	0.713681	TM4SF4	-0.367643	-0.959641	0.713139	0.999148	AC092142.1	0.268669	0.773092	0.788185	0.99972	EYA1	2.38824	4.13264	0.0169293	0.0348101	LINC00159	-0.0459188	-22.5476	0.963375	0.99998
AC097448.1	0.361477	0.984368	0.717743	0.999942	BACH2	-0.81308	-1.28989	0.416172	0.713681	AL022157.1	-0.367901	-3.28764	0.712947	0.999148	COL8A2	0.26784	1.57171	0.788822	0.99972	AC106818.2	2.38562	4.23045	0.0170505	0.0350353	AC090517.4	-0.0459188	-22.8321	0.963375	0.99998
DNM3	0.358456	0.0356015	0.720002	0.999942	RNF165	-0.815843	-0.693224	0.41459	0.711946	LACTB2-AS1	-0.368512	-1.13704	0.712491	0.999148	LAMA2	0.267829	-0.0993981	0.788831	0.99972	AC026347.2	2.37565	2.37704	0.017518	0.0359466	AL031587.2	-0.0459188	-22.5852	0.963375	0.99998
AC093227.2	0.357932	0.894737	0.720394	0.999942	H4C4	-0.817002	-3.53083	0.413927	0.711215	UBE2R2-AS1	-0.369455	-2.34819	0.711789	0.999148	LRRC8C-DT	0.264938	0.440358	0.791058	0.99972	FBXO32	2.37477	0.215724	0.0175601	0.0360083	AL590101.1	-0.0459188	-22.5725	0.963375	0.99998
AC066613.2	0.356732	0.852894	0.721293	0.999942	AC007040.2	-0.819169	-1.74838	0.41269	0.709496	TUB	-0.37056	-0.29717	0.710965	0.999148	LINC01122	0.264839	0.424947	0.791133	0.99972	NFASC	2.37277	4.66616	0.0176554	0.036179	AC010333.2	-0.0459188	-22.5377	0.963375	0.99998
AC090844.2	0.355729	0.646887	0.722044	0.999942	CEMIP	-0.82421	-0.563233	0.40982	0.704966	TEKT2	-0.372455	0.462161	0.709554	0.999148	AC112722.1	0.26418	0.316466	0.791641	0.99972	SETBP1	2.36264	1.25663	0.0181454	0.0371579	STEAP2-AS1	-0.0459928	-0.627044	0.963316	0.99998
NPIPB12	0.352773	1.21421	0.724259	0.999942	AC093249.2	-0.826985	-1.46137	0.408245	0.70266	ADAMTSL4-AS2	-0.372574	-1.36417	0.709465	0.999148	CASS4	0.262244	1.86173	0.793133	0.99972	RGN	2.35238	2.31191	0.0186537	0.0381495	CNTN5	-0.0465845	0.170953	0.962844	0.99998
ALDH16A1	0.352175	1.50984	0.724707	0.999942	TPBGL	-0.827134	-1.45308	0.408161	0.70266	PNMA8C	-0.372913	0.072453	0.709213	0.999148	AC093425.1	0.261753	1.2651	0.793512	0.99972	FER1L6	2.35235	2.69649	0.0186551	0.0381495	AC105036.3	-0.046693	-0.391305	0.962758	0.99998
APCDD1L-DT	0.351244	1.46332	0.725406	0.999942	AC053513.1	-0.828351	-1.04624	0.407472	0.702134	AC005532.1	-0.374998	-2.1453	0.707662	0.999148	AC113414.1	0.261593	0.262707	0.793635	0.99972	MB21D2	2.34874	0.455643	0.0188373	0.0384958	AC093722.1	-0.046979	0.269087	0.96253	0.99998
AC005920.2	0.348589	1.23146	0.727398	0.999942	LINC02730	-0.838085	-3.66733	0.401983	0.693074	AC005162.2	-0.375017	-2.28345	0.707648	0.999148	MAGI2	0.26157	0.136032	0.793653	0.99972	C1QTNF7-AS1	2.34741	1.86245	0.0189043	0.0386065	MKX	-0.0470628	-0.0277231	0.962463	0.99998
LINC02646	0.347459	0.528659	0.728247	0.999942	CCR7	-0.839551	-2.19301	0.40116	0.692053	ISM1	-0.376545	-1.75558	0.706512	0.999148	MYH7B	0.259905	1.37004	0.794937	0.99972	PGM5	2.34699	3.87744	0.0189259	0.0386243	AC004494.1	-0.0473538	-22.722	0.962231	0.99998
ABCA4	0.34702	0.848012	0.728577	0.999942	NLRP1	-0.845842	-2.57819	0.397641	0.686376	AC074011.1	-0.376564	0.41524	0.706497	0.999148	TMEM241	0.259452	-0.0409514	0.795287	0.99972	KCNQ1OT1	2.33925	1.28209	0.0193227	0.0393805	AC007923.4	-0.0473538	-22.7211	0.962231	0.99998
ARMH4	0.346212	-0.0813193	0.729183	0.999942	AC015813.8	-0.846238	-2.37077	0.39742	0.686376	C10orf67	-0.377511	0.156719	0.705794	0.999148	COL5A2	0.258982	0.690211	0.795649	0.99972	PRKCH	2.32653	0.544917	0.0199901	0.0407129	AL138995.1	-0.0473538	-22.4606	0.962231	0.99998
CCN5	0.344757	2.90456	0.730277	0.999942	FER1L6	-0.848798	-1.15649	0.395994	0.684321	LANCL1-AS1	-0.378072	-1.35791	0.705377	0.999148	SDK2	0.258728	-0.0716997	0.795845	0.99972	SHROOM4	2.3148	1.30412	0.0206236	0.0419748	CLN6	-0.0473538	-22.5829	0.962231	0.99998
LINC00598	0.342126	0.175731	0.732256	0.999942	SCN11A	-0.853256	-2.48822	0.393517	0.680433	AC107223.1	-0.378124	-1.47652	0.705338	0.999148	AL591806.4	0.257638	0.157097	0.796687	0.99972	SIDT1	2.31272	3.17033	0.0207383	0.0421796	MAPK10-AS1	-0.0473538	-22.6981	0.962231	0.99998
CFLAR-AS1	0.341305	0.221293	0.732874	0.999942	AC092650.1	-0.860957	-1.93518	0.389262	0.673463	TMPRSS5	-0.37898	-3.21451	0.704703	0.999148	SPDYE2B	0.256131	1.39281	0.79785	0.99972	AL445250.1	2.31104	3.95999	0.0208308	0.0423391	CCDC3	-0.0473538	-22.6519	0.962231	0.99998
CDKN2A	0.340422	-0.126944	0.733539	0.999942	UPK2	-0.861706	-1.99963	0.388849	0.673138	SAT1	-0.38033	-1.01517	0.7037	0.999148	PKD1L1	0.254411	1.78354	0.799178	0.99972	AC079035.1	2.30467	4.94813	0.0211848	0.0430294	AL590006.1	-0.0473538	-22.7358	0.962231	0.99998
AC131934.1	0.339963	0.787301	0.733884	0.999942	TUB	-0.867714	-2.2571	0.385551	0.667814	AL627422.2	-0.381518	-0.604506	0.702819	0.999148	PLAC8L1	0.254003	1.19762	0.799493	0.99972	ANKRD18B	2.30244	3.81951	0.0213105	0.0432555	AL450998.3	-0.0473538	-22.6176	0.962231	0.99998
PAK5	0.339439	2.60943	0.734279	0.999942	RBP5	-0.869221	-1.463	0.384726	0.666769	AC011405.1	-0.382136	-1.87131	0.702361	0.999148	MASP2	0.253826	1.11475	0.79963	0.99972	LARGE1	2.29233	0.668902	0.0218863	0.0443942	AC104653.1	-0.0473538	-22.694	0.962231	0.99998
LINC00299	0.335546	0.809233	0.737213	0.999942	CR1	-0.874671	-2.27438	0.381753	0.661999	OCA2	-0.384235	-0.865982	0.700804	0.999148	UPK2	0.253542	0.168366	0.79985	0.99972	ANKRD44	2.27926	2.19032	0.0226517	0.0459156	APOA1-AS	-0.0473538	-22.5722	0.962231	0.99998
DDTL	0.335018	0.961741	0.737612	0.999942	AP001011.2	-0.878925	-0.826336	0.379442	0.658373	AC073842.2	-0.384528	-3.15801	0.700587	0.999148	CHRM3	0.253508	0.836157	0.799875	0.99972	CA9	2.27084	0.184135	0.0231566	0.0468757	CFAP44-AS1	-0.0473538	-22.6207	0.962231	0.99998
AL139384.1	0.334238	0.13272	0.7382	0.999942	DUOX2	-0.881383	-2.62756	0.378111	0.656442	LINC01132	-0.385121	-1.08763	0.700148	0.999148	UBAP1L	0.25226	0.0445817	0.80084	0.99972	SPATA5	2.25546	0.546611	0.0241047	0.0486964	AC048382.2	-0.0484583	-0.715831	0.961351	0.99998
STPG2	0.333992	-0.0180644	0.738386	0.999942	RAB15	-0.882988	-1.46491	0.377243	0.655315	AL365356.1	-0.385197	-1.19218	0.700091	0.999148	AC027644.4	0.251552	0.892902	0.801387	0.99972	GREB1L	2.24764	1.19501	0.024599	0.0496616	INSYN2A	-0.0487887	-22.7896	0.961088	0.99998
ACACB	0.333008	-0.0198466	0.739128	0.999942	AC104078.2	-0.883858	-1.23343	0.376773	0.654877	AC021086.1	-0.385246	-1.40311	0.700055	0.999148	AC092574.2	0.251166	0.330825	0.801686	0.99972	ENPEP	2.24629	4.64124	0.0246852	0.0498021	ACSL3-AS1	-0.0487887	-22.5788	0.961088	0.99998
TTC3-AS1	0.332585	1.11696	0.739447	0.999942	ABCA12	-0.888117	-0.293815	0.374478	0.651266	PTHLH	-0.386678	0.369135	0.698995	0.999148	STAC	0.246843	0.587722	0.80503	0.99972	INVS	2.21903	0.350999	0.0264848	0.0533967	SPATA45	-0.0487887	-22.559	0.961088	0.99998
GRIP2	0.331288	0.899909	0.740427	0.999942	SATB2	-0.889415	-1.83013	0.37378	0.65043	NTNG1	-0.388498	-23.882	0.697647	0.999148	AC005258.1	0.245254	0.256445	0.80626	0.99972	AC138627.1	2.21269	2.88087	0.0269188	0.0542352	AC125618.2	-0.0487887	-22.797	0.961088	0.99998
SLCO5A1	0.329571	-0.0296012	0.741724	0.999942	KCND2	-0.903337	-0.169625	0.366347	0.637865	Z83844.1	-0.388498	-23.9207	0.697647	0.999148	AP000676.5	0.244723	0.556147	0.806671	0.99972	OCA2	2.19877	3.32665	0.0278945	0.0561304	HPN-AS1	-0.0487887	-22.5642	0.961088	0.99998
AC007389.1	0.322283	0.0967075	0.747238	0.999942	AL359317.2	-0.904749	-1.4506	0.365598	0.636931	KCNB1	-0.38862	-0.557978	0.697557	0.999148	AC128687.2	0.244627	0.574213	0.806746	0.99972	AC128687.2	2.19873	3.44393	0.0278968	0.0561304	LINC00390	-0.0487887	-22.6236	0.961088	0.99998
PLA2G3	0.32087	1.92012	0.748309	0.999942	COL28A1	-0.906206	-1.0759	0.364827	0.635956	AC008691.1	-0.389218	-1.5657	0.697115	0.999148	CATSPERE	0.244595	-0.0261286	0.80677	0.99972	LINC01708	2.18158	4.20624	0.0291404	0.0585933	VCAN	-0.0487887	-22.6513	0.961088	0.99998
AL008633.1	0.3193	1.04808	0.749499	0.999942	ZNF385D	-0.912807	-1.11412	0.361344	0.630251	RGS17	-0.389227	-1.72593	0.697108	0.999148	LINC01619	0.244252	1.05928	0.807036	0.99972	AL645568.1	2.16813	1.03847	0.0301488	0.0605803	PNPLA5	-0.0487887	-22.6094	0.961088	0.99998
TMPRSS5	0.31656	0.912016	0.751578	0.999942	LINC00534	-0.912983	-0.97971	0.361252	0.630251	SLC6A12	-0.391383	-0.371878	0.695514	0.999148	CRPPA	0.243089	-0.211096	0.807937	0.99972	AC011921.1	2.16232	2.27724	0.0305938	0.0614333	LINC02462	-0.0487887	-22.7165	0.961088	0.99998
RBFOX1	0.315786	0.926907	0.752165	0.999942	AC020911.2	-0.914126	-0.86358	0.360651	0.629774	MROH9	-0.391818	0.0483581	0.695193	0.999148	AC138028.2	0.242907	0.648514	0.808077	0.99972	LINC01132	2.15611	3.69065	0.031075	0.062358	DMRTA2	-0.0487887	-22.6769	0.961088	0.99998
AC144831.1	0.314741	2.13402	0.752958	0.999942	AC016747.4	-0.916499	-2.37803	0.359405	0.627965	AC099489.1	-0.393211	-1.87921	0.694163	0.999148	ANKRD2	0.24284	0.588684	0.808129	0.99972	AP000424.1	2.15334	4.00162	0.0312921	0.0627516	AL078582.2	-0.0487887	-22.6731	0.961088	0.99998
PLS3-AS1	0.312768	0.770864	0.754457	0.999942	SPART-AS1	-0.918718	-1.40368	0.358243	0.6263	AC025580.2	-0.394048	-24.0716	0.693545	0.999148	DOCK4	0.24231	-0.163183	0.80854	0.99972	AQP5	2.14587	0.304574	0.0318836	0.0638949	AC007743.1	-0.0487887	-22.6297	0.961088	0.99998
AC079921.1	0.311977	0.314669	0.755058	0.999942	SOX2-OT	-0.919467	-1.07495	0.357851	0.625979	SLC5A2	-0.39471	-1.37904	0.693057	0.999148	HECW1	0.242012	0.86574	0.808771	0.99972	Z94721.1	2.13956	1.21452	0.0323903	0.0648238	AL135926.1	-0.0487887	-22.5953	0.961088	0.99998
AC109927.1	0.311863	0.740185	0.755144	0.999942	AC114763.1	-0.921305	-0.76786	0.356891	0.624664	CHURC1-FNTB	-0.395472	-0.957964	0.692494	0.999148	LACTB2-AS1	0.240632	0.517519	0.809841	0.99972	KIF26B	2.13904	0.524548	0.0324325	0.0648649	C3orf67	-0.0501793	-0.28575	0.959979	0.99998
NFATC2	0.31118	-0.0540824	0.755664	0.999942	SEC14L2	-0.933465	-1.26742	0.35058	0.613976	ACKR2	-0.396273	-1.28398	0.691904	0.999148	AC027682.4	0.240379	1.25416	0.810036	0.99972	CASC15	2.13626	3.36219	0.0326586	0.0652736	AL691447.2	-0.0502237	-22.6732	0.959944	0.99998
STAM-AS1	0.308133	0.740965	0.757981	0.999942	NLGN1	-0.936088	-0.667115	0.349228	0.611965	MRLN	-0.398164	0.490011	0.69051	0.999148	ARPC3	0.239642	0.741229	0.810608	0.99972	AQP7	2.13417	4.44976	0.0328286	0.0655698	AC027250.2	-0.0502237	-22.701	0.959944	0.99998
ZMAT4	0.306652	1.5505	0.759108	0.999942	EXOSC7	-0.936281	-0.589381	0.349129	0.611965	ERG	-0.398735	-1.89295	0.690088	0.999148	AP006545.1	0.23944	0.708492	0.810764	0.99972	LINC01805	2.13388	5.28999	0.0328529	0.0655747	COL4A6	-0.0502237	-22.6856	0.959944	0.99998
SYCP2L	0.306391	1.15784	0.759307	0.999942	HPN	-0.93918	-1.64304	0.347639	0.609892	AC092338.3	-0.398755	-1.97515	0.690074	0.999148	APOA1-AS	0.238656	1.41584	0.811373	0.99972	C2orf92	2.13102	2.30069	0.0330877	0.0659994	SFMBT2	-0.0502237	-22.7197	0.959944	0.99998
LINC01482	0.301268	1.41195	0.76321	0.999942	SAXO1	-0.940388	-1.3049	0.347019	0.609161	AP006545.3	-0.398769	-2.00058	0.690064	0.999148	NBPF20	0.236224	0.424025	0.813259	0.99972	MIRLET7BHG	2.10615	0.487949	0.0351916	0.0701494	TTC21B-AS1	-0.0502237	-22.6295	0.959944	0.99998
AC027250.2	0.300673	1.93734	0.763664	0.999942	AC120193.1	-0.942075	-0.776727	0.346154	0.607999	KCNH8	-0.398769	-1.96839	0.690064	0.999148	AC010967.1	0.235303	2.66727	0.813973	0.99972	AC022126.1	2.09906	2.55045	0.0358117	0.071338	AC103739.2	-0.0502237	-22.7449	0.959944	0.99998
UPP2	0.29977	0.208367	0.764353	0.999942	RAPGEF4	-0.942398	-0.764671	0.345989	0.607999	AL356124.1	-0.399557	-1.15619	0.689483	0.999148	AC107072.2	0.23285	0.455144	0.815878	0.99972	PAMR1	2.09875	3.9763	0.0358387	0.0713444	SGSM1	-0.0502237	-22.8102	0.959944	0.99998
LANCL1-AS1	0.299313	0.606379	0.764701	0.999942	KIF26B-AS1	-0.944375	-2.97396	0.344978	0.606643	H4C4	-0.402097	-0.51452	0.687612	0.999148	AC004594.1	0.232622	1.16454	0.816055	0.99972	SLC34A2	2.09016	0.73513	0.0366032	0.072818	LINC01258	-0.0502237	-22.563	0.959944	0.99998
AC022335.1	0.29837	1.07047	0.765421	0.999942	CCDC62	-0.945598	-1.95061	0.344354	0.605901	TRH	-0.402724	-2.29832	0.687151	0.999148	SPOCK3	0.232606	0.501373	0.816068	0.99972	AC010168.1	2.08618	3.17573	0.0369624	0.0734838	AC138969.1	-0.0502237	-22.517	0.959944	0.99998
SBSN	0.297933	0.202408	0.765754	0.999942	MTCL1	-0.945612	-1.85382	0.344347	0.605901	AC138028.2	-0.402745	-2.43049	0.687136	0.999148	SLC5A10	0.230831	1.24403	0.817446	0.99972	LINC00589	2.08531	4.29145	0.0370412	0.0735917	ZBTB20-AS5	-0.0502237	-22.7145	0.959944	0.99998
AC006547.2	0.29736	0.875135	0.766192	0.999942	AL359878.1	-0.945887	-1.71658	0.344206	0.605901	HELLPAR	-0.402751	-2.46708	0.687131	0.999148	SAMD12-AS1	0.230823	1.36714	0.817452	0.99972	TFF2	2.07726	1.14724	0.0377776	0.0750051	AC020663.5	-0.0502237	-22.6361	0.959944	0.99998
AC004083.1	0.296098	1.46785	0.767155	0.999942	LINC02683	-0.946274	-1.82918	0.344009	0.605901	FSTL4	-0.406081	0.00964448	0.684683	0.999148	ZNRF2	0.229656	-0.0376725	0.818359	0.99972	AL353743.2	2.07637	3.75428	0.0378596	0.0751183	SPART-AS1	-0.0505837	-0.138841	0.959657	0.99998
MYRIP	0.294057	1.08182	0.768714	0.999942	AC007681.1	-0.94933	-0.880802	0.342453	0.603973	AC093227.2	-0.40828	-2.31704	0.683068	0.999148	AC009163.1	0.229561	-0.152427	0.818433	0.99972	SLC39A11	2.06223	0.283024	0.0391863	0.0775455	Z97986.1	-0.0511705	-0.618104	0.95919	0.99998
AC092171.2	0.291784	1.51159	0.770452	0.999942	LINC00571	-0.951893	-0.273007	0.341151	0.602031	PROCR	-0.408298	-2.45658	0.683055	0.999148	AC130324.2	0.228599	0.915477	0.819181	0.99972	ACKR2	2.05241	3.42196	0.0401301	0.0793607	AP003068.1	-0.0516587	-22.6403	0.958801	0.99998
AC009879.4	0.290657	0.144412	0.771313	0.999942	AC104695.2	-0.95232	-2.11563	0.340934	0.602003	AL096803.2	-0.409283	-0.755176	0.682332	0.999148	DDTL	0.227956	0.776698	0.819681	0.99972	ATAD2B	2.05125	0.263885	0.0402428	0.0795312	ANGPT1	-0.0516587	-22.7526	0.958801	0.99998
SPDYE2	0.29046	0.186741	0.771464	0.999942	PSMD6-AS2	-0.954631	-1.22078	0.339764	0.60029	AC067930.4	-0.411354	-1.43028	0.680813	0.999148	SLC2A3	0.22684	0.483179	0.820548	0.99972	CCDC60	2.05025	3.91774	0.0403396	0.07967	AC132153.1	-0.0516587	-22.8073	0.958801	0.99998
GPC6	0.288611	0.501231	0.772879	0.999942	ZSCAN1	-0.958388	-2.84051	0.337867	0.59729	AC010168.1	-0.411891	-0.897995	0.68042	0.999148	AC026464.3	0.226686	1.01629	0.820668	0.99972	AC009061.2	2.04312	1.7987	0.0410403	0.0810005	FGF12-AS3	-0.0516587	-22.6499	0.958801	0.99998
AC080005.1	0.287919	1.23251	0.773409	0.999942	ZNF492	-0.959663	-1.88244	0.337225	0.596506	MAL	-0.413888	-2.74499	0.678956	0.999148	UBE2R2-AS1	0.225808	0.704777	0.82135	0.99972	CDK5R1	2.03243	2.63385	0.04211	0.0830572	AC110491.2	-0.0516587	-22.7673	0.958801	0.99998
TPTE2	0.287835	1.01579	0.773473	0.999942	AC022126.1	-0.960304	-1.71125	0.336902	0.596287	AC004160.1	-0.414464	-1.13564	0.678534	0.999148	AL589740.1	0.225357	1.75823	0.821702	0.99972	FMN2	2.02644	2.75755	0.0427194	0.0842039	DOCK10	-0.0516587	-22.6751	0.958801	0.99998
VSTM5	0.287505	0.752093	0.773725	0.999942	AC008758.5	-0.964048	-0.593607	0.335022	0.593309	ZNF559-ZNF177	-0.416986	-1.73568	0.676689	0.999148	S100G	0.224292	-0.0416674	0.82253	0.99972	SAMD12	2.02596	0.647578	0.0427685	0.0842453	AC139530.3	-0.0516587	-22.7487	0.958801	0.99998
AC022126.1	0.287078	0.236715	0.774053	0.999942	SRD5A2	-0.97284	-2.77679	0.330633	0.585882	AC020911.2	-0.417625	-0.0468212	0.676221	0.999148	ENHO	0.223576	2.35065	0.823087	0.99972	CCPG1	2.00198	1.48445	0.045287	0.0890892	COL8A2	-0.0516587	-22.6071	0.958801	0.99998
AC012629.2	0.285991	0.962977	0.774885	0.999942	AC007422.1	-0.977277	0.0814512	0.328432	0.582326	COL28A1	-0.418997	-0.12791	0.675218	0.999148	AC008269.1	0.222285	0.308698	0.824092	0.99972	LINC01754	2.00117	5.10127	0.0453741	0.089202	AC025279.1	-0.0516587	-22.7421	0.958801	0.99998
AC104187.1	0.285105	0.62333	0.775564	0.999942	AC092647.5	-0.980788	-1.95066	0.326697	0.579593	MEIS1-AS3	-0.419374	-2.49345	0.674943	0.999148	AC107032.2	0.221299	0.465332	0.82486	0.99972	ZNF814	1.9958	0.89556	0.0459561	0.0902871	AC073878.1	-0.0516587	-22.7624	0.958801	0.99998
PI16	0.281567	0.867227	0.778275	0.999942	NRG1	-0.981043	-1.80439	0.326571	0.579593	EML5	-0.41938	-2.35799	0.674938	0.999148	RAPGEF4	0.220368	0.114841	0.825585	0.99972	MASP1	1.98937	3.39345	0.0466598	0.0916096	LARGE1	-0.0520137	0.0224257	0.958518	0.99998
AC116535.2	0.28048	0.711143	0.779109	0.999942	CUBN	-0.990927	-1.00773	0.321721	0.571441	AC011479.2	-0.419389	-2.4061	0.674932	0.999148	BASP1-AS1	0.220123	0.691116	0.825775	0.99972	AC006008.1	1.98605	2.53724	0.0470274	0.0922709	AL360268.1	-0.0530936	-22.6584	0.957657	0.99998
AL365356.1	0.280314	0.32815	0.779237	0.999942	GARNL3	-0.991381	-0.831574	0.321499	0.571385	TNFAIP8L3	-0.419871	-0.0313968	0.67458	0.999148	BRWD1-AS1	0.217552	1.78773	0.827778	0.99972	STX18-AS1	1.98424	0.936735	0.0472289	0.0925998	SCAT2	-0.0530936	-22.7876	0.957657	0.99998
AL357507.1	0.279594	-0.147429	0.779789	0.999942	LINC01843	-0.993846	-2.47346	0.320298	0.569587	C10orf53	-0.421367	-0.859751	0.673487	0.999148	SYT3	0.217442	1.65425	0.827864	0.99972	STAR	1.98399	3.70265	0.0472568	0.0925998	TEX46	-0.0530936	-22.8623	0.957657	0.99998
AC107032.2	0.278915	0.378069	0.78031	0.999942	AC006008.1	-1.0012	-2.30656	0.316731	0.563578	ST8SIA1	-0.421419	-1.0586	0.67345	0.999148	PI16	0.215951	0.633279	0.829026	0.99972	AC105450.1	1.97736	2.67661	0.0480009	0.0939966	AL445248.1	-0.0530936	-22.7565	0.957657	0.99998
SST	0.277956	0.992905	0.781046	0.999942	AC006299.1	-1.00396	-1.23525	0.3154	0.561542	AC006547.2	-0.421798	-23.9954	0.673172	0.999148	KCNIP2-AS1	0.215091	1.15433	0.829696	0.99972	AC002460.2	1.97444	3.08152	0.0483314	0.094582	AL138479.2	-0.0530936	-22.719	0.957657	0.99998
AC124312.5	0.275709	0.576958	0.782772	0.999942	NR3C2	-1.00697	-0.489121	0.313949	0.559292	AKAP6	-0.423143	-0.373386	0.672191	0.999148	MIR181A1HG	0.214902	0.0819698	0.829844	0.99972	AC013472.1	1.96915	4.52405	0.0489358	0.0956919	AC090186.1	-0.0530936	-22.7731	0.957657	0.99998
AL136531.2	0.274917	0.34561	0.78338	0.999942	BTG4	-1.00761	-2.96209	0.313641	0.559074	AC024145.1	-0.423361	-3.18953	0.672032	0.999148	AC027808.1	0.213928	0.197744	0.830604	0.99972	PREX2	1.96892	0.142418	0.0489623	0.0956919	ADGRG3	-0.0530936	-22.7112	0.957657	0.99998
AC008770.2	0.272959	1.04475	0.784885	0.999942	LINC00639	-1.00796	-2.66616	0.313476	0.559074	ANKRD2	-0.423911	-1.17959	0.67163	0.999148	RNF217-AS1	0.213835	0.0885297	0.830676	0.99972	LINC02614	1.96569	2.0458	0.049334	0.0963555	SLC8A1-AS1	-0.0530936	-22.6855	0.957657	0.99998
CA1	0.272291	1.17228	0.785398	0.999942	CDK5R1	-1.0082	-2.24976	0.313358	0.559074	AXDND1	-0.424494	-0.374746	0.671206	0.999148	AC104335.2	0.213549	1.52748	0.830899	0.99972	TFPI2	1.95956	0.17595	0.0500467	0.0976838	LINC01250	-0.0530936	-22.7952	0.957657	0.99998
AL049828.2	0.271294	0.465063	0.786165	0.999942	WDR45	-1.00979	-1.65834	0.312595	0.558205	XKRX	-0.425494	-1.13583	0.670477	0.999148	AC126182.3	0.213439	1.31544	0.830985	0.99972	LINC00326	1.95927	4.30441	0.0500809	0.097687	AL109824.1	-0.0531035	-1.04434	0.957649	0.99998
FP671120.5	0.27019	0.85929	0.787014	0.999942	AC007262.2	-1.00996	-1.51022	0.312514	0.558205	AP000676.5	-0.426487	-1.95573	0.669753	0.999148	ADGRV1	0.213048	1.0243	0.831289	0.99972	TAFA2	1.95472	1.29396	0.0506157	0.098666	LINC02795	-0.0532021	-1.15499	0.957571	0.99998
CACNB2	0.270166	0.90529	0.787033	0.999942	AKNAD1	-1.01126	-1.20006	0.311894	0.557617	CEACAM6	-0.426795	-2.5625	0.669529	0.999148	B4GALT4-AS1	0.21274	0.82694	0.831529	0.99972	SPOCK2	1.93673	4.72161	0.0527789	0.102816	SLC2A3	-0.053853	-0.460636	0.957052	0.99998
POF1B	0.270095	0.855232	0.787087	0.999942	GNG12-AS1	-1.01801	-1.20727	0.308672	0.552186	LINC00639	-0.427156	-0.259266	0.669266	0.999148	AL008633.1	0.210481	0.642128	0.833293	0.99972	AC079760.1	1.93245	2.87428	0.0533034	0.10377	CRMP1	-0.0539319	-0.582248	0.956989	0.99998
AL353576.1	0.269591	1.04444	0.787475	0.999942	PRR26	-1.02258	-2.11869	0.306507	0.54864	ODF3B	-0.429486	0.396791	0.66757	0.999148	AC022126.1	0.209932	0.308372	0.83372	0.99972	WDR45	1.91774	2.2915	0.0551446	0.107285	MCC	-0.05407	0.09499	0.956879	0.99998
ABLIM3	0.268491	-0.0208285	0.788322	0.999942	KIF3C	-1.02398	-1.43284	0.305845	0.547782	AC114778.2	-0.429496	-1.36365	0.667562	0.999148	AC005154.4	0.209731	1.65799	0.833877	0.99972	PRSS1	1.91271	0.419809	0.0557846	0.10839	AC004160.1	-0.0540996	-0.742563	0.956856	0.99998
FNDC1	0.267153	1.36845	0.789351	0.999942	CSMD1	-1.02903	-2.69309	0.303465	0.543844	SPX	-0.429606	-1.55804	0.667482	0.999148	DPH6-DT	0.209244	0.0704851	0.834258	0.99972	ADAM22	1.90804	4.24834	0.0563855	0.109486	AC002460.2	-0.054139	-0.776554	0.956824	0.99998
C17orf77	0.267089	1.32019	0.789401	0.999942	ERICH6	-1.03001	-2.07547	0.303003	0.543341	DGKG	-0.435109	-0.00741988	0.663483	0.999148	RHCE	0.208883	0.765167	0.834539	0.99972	MFGE8	1.90754	0.452213	0.0564502	0.109541	NCKAP5	-0.0544941	-0.461748	0.956542	0.99998
AC107072.2	0.265909	0.45245	0.790309	0.999942	GP6	-1.03055	-1.7901	0.302753	0.543217	AL356310.1	-0.435313	-0.178576	0.663335	0.999148	AL078644.2	0.208509	0.636037	0.834832	0.99972	KLHL22	1.90704	0.661823	0.0565149	0.109596	C1orf137	-0.0545286	-22.6886	0.956514	0.99998
UNC13C	0.265522	1.62656	0.790608	0.999942	NCKAP5	-1.04121	-0.768831	0.297776	0.534607	FOXN4	-0.436463	-0.0763986	0.662501	0.999148	PPP1R14C	0.207844	-0.322143	0.835351	0.99972	ADGRF4	1.90206	4.33765	0.057163	0.110781	CD38	-0.0545286	-22.8221	0.956514	0.99998
MEIS1-AS3	0.264624	0.686713	0.791299	0.999942	LINC01409	-1.04127	-0.711497	0.297752	0.534607	LINC00635	-0.437646	-0.0404802	0.661643	0.999148	AL132671.2	0.207511	1.30177	0.835611	0.99972	TRIM16	1.89162	0.913824	0.0585421	0.11338	AC004083.1	-0.0545286	-22.8462	0.956514	0.99998
AC011479.2	0.264057	0.500095	0.791736	0.999942	AC011476.3	-1.04174	-0.636634	0.297533	0.534607	KCNN3	-0.438485	0.333756	0.661035	0.999148	AL158198.1	0.20742	1.07424	0.835682	0.99972	IQCJ-SCHIP1	1.87603	2.80447	0.0606512	0.117389	MYH7B	-0.0545286	-22.7433	0.956514	0.99998
AC024145.1	0.263834	0.664866	0.791908	0.999942	AKAP12	-1.043	-0.149013	0.296948	0.534079	STAG3	-0.43891	0.26315	0.660727	0.999148	FNDC1	0.207341	1.10679	0.835743	0.99972	NRP1	1.86568	1.31075	0.0620865	0.120013	SCIMP	-0.0545286	-22.8233	0.956514	0.99998
AC104123.1	0.263511	0.222994	0.792157	0.999942	AADACL2-AS1	-1.04737	-0.869665	0.294929	0.530767	CSTF3-DT	-0.439082	-1.68503	0.660602	0.999148	IQCJ-SCHIP1	0.204032	0.16326	0.838328	0.99972	SLC6A12	1.86019	2.58811	0.0628585	0.121427	SOBP	-0.0545286	-22.7281	0.956514	0.99998
LINC00923	0.262322	0.788453	0.793073	0.999942	AC073529.1	-1.04908	-0.444589	0.29414	0.529664	STAM-AS1	-0.440012	-3.36872	0.659928	0.999148	AL157400.3	0.203528	0.378228	0.838723	0.99972	AL109955.2	1.85918	4.97631	0.0630021	0.121626	PLA2G3	-0.0545286	-22.7436	0.956514	0.99998
AC114956.2	0.261139	0.094731	0.793985	0.999942	LINC01697	-1.04984	-3.09863	0.293794	0.529358	LRIG2-DT	-0.440019	-3.40302	0.659924	0.999148	AC007285.1	0.202567	0.113239	0.839473	0.99972	UPP2	1.85115	2.30061	0.0641473	0.123757	AL356277.3	-0.0545286	-22.8843	0.956514	0.99998
AF130359.1	0.259597	2.35735	0.795175	0.999942	SLCO1B3-SLCO1B7	-1.05313	-1.29524	0.292281	0.526949	ABCA10	-0.440688	-1.48824	0.659439	0.999148	AL512656.2	0.201824	1.31747	0.840054	0.99972	2024-12-01	1.84299	1.48214	0.0653299	0.125796	AC011092.2	-0.0545286	-22.9118	0.956514	0.99998
AC073842.2	0.257649	0.635713	0.796678	0.999942	LINC00598	-1.05363	-1.11632	0.292051	0.52685	AP001628.1	-0.444605	-1.5411	0.656605	0.999148	ERICH6	0.20094	0.163335	0.840745	0.99972	GAL	1.83781	1.86579	0.0660905	0.127179	PITPNM2	-0.0547505	-0.334663	0.956337	0.99998
LINC01250	0.256623	1.28682	0.79747	0.999942	CSGALNACT1	-1.05808	-2.0547	0.290019	0.5235	MRVI1-AS1	-0.444828	0.488284	0.656444	0.999148	AC023509.6	0.200765	0.247907	0.840882	0.99972	ADGRL3	1.81992	0.978449	0.0687714	0.132253	SLC17A3	-0.0556973	-0.852963	0.955583	0.99998
ADAMTSL4-AS1	0.255837	-0.126228	0.798077	0.999942	MB	-1.06285	-5.03467	0.287849	0.519897	AL353660.1	-0.444914	0.380292	0.656382	0.999148	AC104187.1	0.200704	0.685274	0.84093	0.99972	CNN1	1.81029	4.64303	0.07025	0.13501	STARD13-AS	-0.0559635	-23.0326	0.955371	0.99998
ZNF559-ZNF177	0.255626	0.360209	0.79824	0.999942	EFR3B	-1.06318	-3.8388	0.287702	0.519897	ITGAL	-0.446133	-0.0830424	0.655501	0.999148	AC011472.1	0.198868	0.670815	0.842366	0.99972	STXBP5-AS1	1.80792	2.72306	0.0706189	0.135632	LINC02742	-0.0559635	-22.9589	0.955371	0.99998
WDR45	0.255419	0.239044	0.798399	0.999942	GRID2	-1.06962	-0.622299	0.28479	0.514992	TMEM200A	-0.446247	0.128466	0.655419	0.999148	ACSBG2	0.198393	2.99947	0.842738	0.99972	ADAMTS9-AS2	1.79256	0.989848	0.0730436	0.140199	SLC14A2	-0.0559635	-22.8878	0.955371	0.99998
MAP1B	0.25359	-0.205452	0.799813	0.999942	HHLA2	-1.07094	-3.09642	0.284197	0.514228	LINC01765	-0.447561	0.447287	0.65447	0.999148	AC021851.2	0.197746	1.06139	0.843244	0.99972	RHOXF1-AS1	1.78803	2.9651	0.0737707	0.141414	AC124944.3	-0.0559635	-22.8819	0.955371	0.99998
AC008629.1	0.25224	0.398532	0.800856	0.999942	AC009879.4	-1.07463	-1.06742	0.282539	0.511537	FMN2	-0.448109	-0.750321	0.654075	0.999148	AL451007.2	0.197359	0.898664	0.843546	0.99972	AC023421.2	1.76747	1.57864	0.0771492	0.147795	AC073316.1	-0.0559635	-22.8842	0.955371	0.99998
C6orf47-AS1	0.250627	1.69998	0.802103	0.999942	C1QTNF3-AMACR	-1.07484	0.162237	0.282448	0.511537	AC008764.1	-0.448638	-1.86434	0.653693	0.999148	G2E3-AS1	0.197202	0.687115	0.84367	0.99972	SAMD11	1.74632	4.48225	0.0807561	0.154607	KCNIP2-AS1	-0.0559635	-22.7908	0.955371	0.99998
AC068533.4	0.249631	0.558112	0.802873	0.999942	TYW1B	-1.07698	-0.0915893	0.281489	0.510252	ABCA4	-0.449548	-24.1156	0.653036	0.999148	AC025178.2	0.19648	0.39163	0.844235	0.99972	KPNA7	1.74589	4.31397	0.0808309	0.154651	CSGALNACT1	-0.0568561	-0.531063	0.95466	0.99998
AC008892.1	0.248491	1.05351	0.803755	0.999942	AC105916.2	-1.08254	-0.967259	0.279013	0.506069	ADAMTS7	-0.449548	-24.0707	0.653036	0.999148	SHANK2-AS1	0.196176	1.67069	0.844472	0.99972	AC007014.1	1.74215	4.04914	0.0814818	0.155797	LINC01482	-0.0573985	-22.9036	0.954228	0.99998
AC021851.1	0.248007	0.160883	0.804129	0.999942	AC011346.1	-1.08796	-1.41097	0.276613	0.50202	AC211433.1	-0.450234	-1.72837	0.652542	0.999148	AC092718.1	0.195985	1.23551	0.844622	0.99972	AC090921.1	1.73971	4.25218	0.08191	0.156516	SAMD3	-0.0573985	-22.9393	0.954228	0.99998
AC011092.2	0.246834	1.09529	0.805037	0.999942	AC098484.4	-1.09607	-1.1106	0.273048	0.495851	AC113414.1	-0.450978	-0.335167	0.652005	0.999148	LINC01290	0.194265	0.426495	0.845968	0.99972	LINC02795	1.73708	3.00823	0.0823722	0.157299	AL356317.2	-0.0573985	-22.9039	0.954228	0.99998
AP000311.1	0.245937	0.209878	0.805731	0.999942	RNF103-CHMP3	-1.10376	-0.980369	0.269699	0.490065	CNTNAP2	-0.451115	-3.53182	0.651906	0.999148	AC116366.3	0.194135	0.326859	0.84607	0.99972	LINC00571	1.72466	1.43813	0.0845881	0.161428	AL158198.1	-0.0588335	-22.9538	0.953085	0.99998
AC092650.1	0.244445	0.30412	0.806886	0.999942	MYRFL	-1.10496	-0.645337	0.269175	0.48941	RAET1G	-0.45422	-2.1931	0.649671	0.999148	PNPLA5	0.193932	1.28332	0.846229	0.99972	AP003059.1	1.7205	4.03313	0.0853415	0.162762	AC126121.3	-0.0588335	-22.9077	0.953085	0.99998
AL359198.1	0.243804	0.805151	0.807383	0.999942	AL049869.3	-1.10724	-2.12672	0.268191	0.487916	LINC01088	-0.454694	-1.04801	0.649329	0.999148	IGFL2-AS1	0.193905	1.17276	0.846251	0.99972	DST-AS1	1.71023	4.42868	0.087223	0.166139	AC079336.4	-0.0588335	-22.9337	0.953085	0.99998
AC087280.2	0.242455	0.0457482	0.808427	0.999942	TRPV4	-1.11582	-1.5477	0.264499	0.481491	FAM71D	-0.456667	-3.57802	0.64791	0.999148	EYS	0.19196	0.300399	0.847773	0.99972	AL139317.5	1.70637	1.96971	0.0879387	0.167396	SPARCL1	-0.0588335	-22.8436	0.953085	0.99998
SIDT1	0.242301	0.249472	0.808547	0.999942	FSTL4	-1.12277	-1.60645	0.261537	0.476387	ANKRD30BL	-0.459915	-0.086626	0.645578	0.999148	AC005480.1	0.190639	0.234711	0.848808	0.99972	PHLPP1	1.69374	0.609843	0.0903146	0.171701	AC099521.2	-0.0588335	-22.8391	0.953085	0.99998
AP000317.2	0.242265	0.550689	0.808574	0.999942	FREM1	-1.12371	-1.23139	0.261138	0.47595	TTLL6	-0.460145	-1.02729	0.645412	0.999148	MIR155HG	0.190505	2.40403	0.848914	0.99972	NID2	1.68419	2.82754	0.0921445	0.175069	FNDC1	-0.0588335	-22.9254	0.953085	0.99998
BASP1-AS1	0.241558	0.547009	0.809123	0.999942	AL356310.1	-1.12716	-3.14101	0.259677	0.473574	AC104187.1	-0.463749	-2.69956	0.642827	0.999148	AC138969.1	0.190158	1.3543	0.849185	0.99972	PGBD5	1.6802	1.67633	0.0929176	0.176426	PZP	-0.0588335	-22.7943	0.953085	0.99998
EDNRB-AS1	0.240974	1.5593	0.809575	0.999942	AC129507.2	-1.12773	-2.6179	0.259432	0.473416	SERPINB7	-0.463929	-3.12869	0.642698	0.999148	ZBTB20-AS5	0.190071	1.18239	0.849253	0.99972	ARHGAP24	1.6691	2.23383	0.0950968	0.180449	MEP1A	-0.0588335	-22.9859	0.953085	0.99998
AL672310.1	0.240218	2.00295	0.810162	0.999942	MSI1	-1.12904	-1.66655	0.25888	0.472696	AC025034.1	-0.464216	-1.17205	0.642493	0.999148	AL691447.2	0.189988	1.17978	0.849318	0.99972	CALML3-AS1	1.66513	4.57395	0.0958864	0.181833	LY6H	-0.0588335	-22.9095	0.953085	0.99998
AC093019.2	0.240009	0.320774	0.810323	0.999942	MTMR7	-1.13035	-1.38377	0.25833	0.471979	HMGA2-AS1	-0.464338	-1.49251	0.642406	0.999148	AC116667.1	0.188277	1.45928	0.85066	0.99972	PRIM2	1.66304	0.202087	0.0963039	0.182509	AC092171.2	-0.0588335	-22.8816	0.953085	0.99998
PPP2R2C	0.239528	0.869876	0.810696	0.999942	AC093722.1	-1.13136	-1.00492	0.257905	0.471491	PAG1	-0.465286	-2.0166	0.641727	0.999148	AC016747.4	0.188275	0.208746	0.850661	0.99972	FCMR	1.65813	1.90032	0.0972914	0.184264	AC100781.1	-0.0602684	-23.0384	0.951942	0.99998
LINC01502	0.239445	2.61863	0.810761	0.999942	AL078604.4	-1.13236	-0.7512	0.257484	0.471007	IL5RA	-0.465658	0.446265	0.64146	0.999148	AC012629.2	0.187346	0.696052	0.851389	0.99972	SYNGAP1-AS1	1.6559	1.90638	0.0977413	0.184999	LINC01619	-0.0602684	-23.2281	0.951942	0.99998
TSBP1-AS1	0.238877	1.00062	0.811201	0.999942	SFRP2	-1.13621	-1.98879	0.255867	0.468334	SLC4A4	-0.466198	-24.2199	0.641074	0.999148	MMADHC-DT	0.187314	0.27807	0.851414	0.99972	MUC4	1.65448	0.631267	0.09803	0.185429	CD37	-0.0602684	-22.899	0.951942	0.99998
AL138927.1	0.237968	1.05907	0.811906	0.999942	SLC47A2	-1.13624	-1.94572	0.255856	0.468334	FAM3D	-0.466808	-1.79412	0.640637	0.999148	FGF12-AS3	0.186139	1.20936	0.852336	0.99972	AC035140.1	1.65281	3.36385	0.0983688	0.185952	ZMAT4	-0.0602684	-22.9368	0.951942	0.99998
LINC02462	0.236429	1.19026	0.813099	0.999942	CDH6	-1.1379	-1.44817	0.255164	0.467619	CSGALNACT1	-0.46863	-0.219366	0.639334	0.999148	DOCK10	0.186131	1.10178	0.852342	0.99972	AL163952.1	1.64308	5.34342	0.100367	0.189611	AL353588.1	-0.0602684	-22.9766	0.951942	0.99998
LINC02432	0.235894	0.734476	0.813515	0.999942	AC007285.1	-1.14256	-1.99547	0.253221	0.464341	NLRP1	-0.468666	-0.954364	0.639308	0.999148	C2CD4A	0.18409	0.0150984	0.853943	0.99972	AP000446.1	1.6411	2.23924	0.100777	0.190145	ANGPT2	-0.0602684	-23.224	0.951942	0.99998
AC025034.1	0.2355	0.442237	0.813821	0.999942	MT1H	-1.14883	-2.73295	0.250626	0.459864	ECT2L	-0.470332	0.461553	0.638118	0.999148	AC092338.3	0.182684	0.456328	0.855046	0.99972	MIR34AHG	1.63563	0.746159	0.101916	0.192174	AC011287.1	-0.0602684	-23.1073	0.951942	0.99998
LRIG2-DT	0.234834	0.627054	0.814338	0.999942	THBS1	-1.15078	-1.73831	0.249821	0.458668	PHLDB2	-0.470908	-2.37278	0.637707	0.999148	TMEM72-AS1	0.182469	0.116592	0.855214	0.99972	AL359878.1	1.63366	2.21142	0.10233	0.192832	AC068051.1	-0.0602684	-22.9627	0.951942	0.99998
AC010768.1	0.234829	0.610631	0.814341	0.999942	XDH	-1.15095	-1.63262	0.249754	0.458668	SPDYE1	-0.470914	-2.25863	0.637702	0.999148	AL359094.1	0.18046	1.31424	0.856792	0.99972	CWH43	1.6169	4.40725	0.1059	0.199309	SYCP2L	-0.0602684	-23.1494	0.951942	0.99998
AC004830.2	0.234356	0.858516	0.814709	0.999942	SPNS3	-1.15709	-1.97479	0.247236	0.454479	IQCJ-SCHIP1	-0.471352	-1.08204	0.63739	0.999148	AL356311.1	0.180115	0.944143	0.857062	0.99972	NLGN1	1.61403	1.68968	0.106522	0.200355	PDE3B	-0.0602684	-22.8162	0.951942	0.99998
ARPC3	0.234126	0.40063	0.814887	0.999942	BCAS1	-1.15796	-1.53461	0.246879	0.454101	DSCAML1	-0.472442	-0.120284	0.636612	0.999148	IKZF2	0.179624	-0.322847	0.857448	0.99972	FCGBP	1.61214	0.627466	0.106931	0.200998	CA1	-0.0617034	-23.0368	0.950799	0.99998
AL138479.2	0.232101	1.42935	0.816459	0.999942	SYNGAP1-AS1	-1.15807	-1.42687	0.246834	0.454101	AL359636.2	-0.474843	-2.63615	0.634899	0.999148	C2	0.17948	0.283131	0.857561	0.99972	MIR548A1HG	1.61053	4.3992	0.107283	0.201533	LINC01342	-0.0617034	-23.0336	0.950799	0.99998
PLD5	0.231973	1.08016	0.816559	0.999942	ERICH3-AS1	-1.15876	-1.24603	0.246555	0.454061	EYS	-0.474849	-2.52998	0.634894	0.999148	AL136115.2	0.178764	1.84871	0.858123	0.99972	NPAS3	1.61021	0.301655	0.107352	0.201537	CAPS2-AS1	-0.0617034	-22.9957	0.950799	0.99998
BACH2	0.231287	0.214478	0.817092	0.999942	TSIX	-1.16031	-0.981906	0.245924	0.453176	AC107072.2	-0.474886	-2.66826	0.634868	0.999148	AC068491.2	0.176581	1.30204	0.859837	0.99972	AL138701.2	1.60371	5.2843	0.108779	0.203961	BHMT2	-0.0617034	-23.0039	0.950799	0.99998
CLDN12	0.231248	1.42384	0.817122	0.999942	MCC	-1.16642	-1.01113	0.243445	0.448884	LINC01122	-0.475355	-1.25191	0.634534	0.999148	CHGA	0.176553	0.0130915	0.859859	0.99972	LINC01725	1.59642	0.952759	0.110396	0.206736	AC017104.1	-0.0617034	-22.9549	0.950799	0.99998
SPDYE21P	0.230629	-0.0266262	0.817603	0.999942	DGKG	-1.17759	-2.22696	0.238961	0.440888	STK32A	-0.476395	-2.12275	0.633793	0.999148	AL109761.1	0.176518	1.33188	0.859887	0.99972	AL591806.4	1.59641	1.6504	0.110397	0.206736	BCL2L1-AS1	-0.0617034	-23.179	0.950799	0.99998
FAM71D	0.23017	0.521465	0.81796	0.999942	C2orf92	-1.1782	-1.74884	0.238716	0.440706	CRMP1	-0.477929	-1.80387	0.632701	0.999148	AC004540.2	0.174895	1.94736	0.861162	0.99972	AL157400.3	1.59587	2.37026	0.110517	0.206831	AC027682.4	-0.0617034	-22.9465	0.950799	0.99998
RHCG	0.226778	1.28449	0.820596	0.999942	DSCAML1	-1.17903	-1.55628	0.238388	0.440372	AC002460.2	-0.477932	-1.71156	0.632698	0.999148	TNFRSF11B	0.174593	0.340472	0.861399	0.99972	AKAP12	1.59088	0.961827	0.111636	0.208795	ANKRD44	-0.0617922	-0.486444	0.950728	0.99998
PRKCQ	0.224795	0.904713	0.822138	0.999942	PTPRR	-1.18532	-2.01668	0.23589	0.436026	AC128687.2	-0.479362	-1.43595	0.631681	0.999148	CACNA1C	0.174378	0.987448	0.861568	0.99972	AC005480.1	1.58994	2.48125	0.111848	0.209062	AC025048.4	-0.0622557	-0.0248843	0.950359	0.99998
AC114763.1	0.22433	0.0553907	0.822501	0.999942	ITGAL	-1.19165	-2.33626	0.233398	0.431685	GPC6	-0.479378	-1.37708	0.63167	0.999148	AC103923.1	0.173728	0.607767	0.86208	0.99972	AC105285.1	1.5754	1.32131	0.115164	0.215048	SIAH2-AS1	-0.0630249	-0.937397	0.949747	0.99998
TYMS	0.221458	-0.21854	0.824736	0.999942	PNMA8C	-1.19718	-3.60963	0.231237	0.427953	AC105036.3	-0.481898	-1.95793	0.629878	0.999148	KCNQ1OT1	0.17353	-0.230691	0.862234	0.99972	CCR7	1.57527	2.39792	0.115194	0.215048	AL138701.2	-0.0631384	-23.0133	0.949656	0.99998
SPINK13	0.220794	0.363428	0.825253	0.999942	AC026347.2	-1.20006	-1.4588	0.230115	0.42614	AC015631.1	-0.486724	-0.812971	0.626454	0.999148	CAPN6	0.173073	0.0112961	0.862594	0.99972	AC025048.4	1.56924	2.76059	0.116592	0.217522	AP000779.1	-0.0631384	-23.1951	0.949656	0.99998
AC005162.2	0.219104	0.53818	0.826569	0.999942	CARNMT1-AS1	-1.20021	-1.47405	0.230056	0.42614	AC048382.2	-0.487465	-2.05859	0.625929	0.999148	ALDH16A1	0.172089	0.737494	0.863368	0.99972	AC105001.1	1.56878	4.41114	0.1167	0.217589	AC092718.1	-0.0631384	-22.9471	0.949656	0.99998
ZNF664	0.218698	0.977776	0.826885	0.999942	ALG13-AS1	-1.20039	-1.36083	0.229986	0.42614	APOBEC4	-0.497211	0.439366	0.61904	0.999148	AC231533.1	0.172022	0.661392	0.86342	0.99972	LINC02026	1.56545	3.68826	0.117478	0.218816	ANXA13	-0.0631384	-22.9373	0.949656	0.99998
KCNN2	0.218627	0.95467	0.826941	0.999942	TMEM100	-1.20416	-3.81805	0.228527	0.423983	CHODL	-0.497589	-1.45661	0.618774	0.999148	AC011477.3	0.171902	0.645469	0.863515	0.99972	AL359317.2	1.56508	2.02679	0.117564	0.218816	SCN5A	-0.0631384	-22.9419	0.949656	0.99998
AC011472.1	0.216717	0.697888	0.828429	0.999942	AC116362.1	-1.20873	-0.104937	0.226765	0.420974	CNIH2	-0.500236	0.442632	0.616909	0.999148	AC093019.2	0.170926	0.362005	0.864282	0.99972	PPP1R1C	1.55081	1.79628	0.120948	0.224811	MARCHF4	-0.0631384	-23.0262	0.949656	0.99998
C4orf36	0.215022	0.841661	0.829751	0.999942	SCART1	-1.2097	-0.692104	0.226396	0.420549	EFR3B	-0.500407	-0.471302	0.616789	0.999148	FLRT1	0.169811	0.501736	0.865158	0.99972	NBPF20	1.54326	2.39985	0.122768	0.22791	AL138927.1	-0.0631384	-23.046	0.949656	0.99998
AC005258.1	0.214952	0.0306708	0.829805	0.999942	STEAP2-AS1	-1.21483	-1.24369	0.224431	0.417159	ELMO1	-0.500835	-0.66431	0.616487	0.999148	AC008629.1	0.169734	0.249948	0.865219	0.99972	ABCA10	1.54282	2.72147	0.122875	0.227969	C10orf53	-0.0637153	0.0259952	0.949197	0.99998
TMEM170A	0.214815	0.800353	0.829912	0.999942	AC133644.3	-1.21578	-0.912639	0.224067	0.41674	LINC02646	-0.501605	-1.67398	0.615945	0.999148	FP671120.5	0.169665	0.535879	0.865273	0.99972	AC129507.2	1.54116	2.06008	0.123278	0.228575	MT1H	-0.0638928	-0.252244	0.949056	0.99998
CCR7	0.213931	0.28448	0.830601	0.999942	AL138885.3	-1.21821	-3.57463	0.223143	0.415278	AC022098.4	-0.504098	-2.19854	0.614193	0.999148	AP001025.1	0.168435	0.877384	0.866241	0.99972	NR3C2	1.53894	1.40671	0.123818	0.229435	AC139530.2	-0.0641887	-0.781231	0.94882	0.99998
AC022826.2	0.213481	1.05084	0.830952	0.999942	MSR1	-1.22059	-1.71826	0.22224	0.413855	AL109824.1	-0.504174	-2.23868	0.614139	0.999148	TBC1D32	0.168425	-0.185062	0.866249	0.99972	MYRFL	1.53421	1.47032	0.124979	0.231442	AL137077.2	-0.0645733	-23.0992	0.948514	0.99998
NBPF20	0.213354	0.26616	0.831051	0.999942	AL683813.2	-1.22287	-0.899448	0.22138	0.41251	NRIP3	-0.505048	-24.2355	0.613525	0.999148	AL109811.1	0.16821	0.720144	0.866418	0.99972	KMO	1.5328	2.90229	0.125324	0.231851	AC007656.2	-0.0645733	-23.2107	0.948514	0.99998
KCNIP2-AS1	0.212736	1.20808	0.831533	0.999942	KRT13	-1.22524	-0.698685	0.220486	0.411098	SPOCK3	-0.506591	-3.64767	0.612442	0.999148	RBP4	0.167615	-0.356688	0.866886	0.99972	AC139720.1	1.53268	3.61229	0.125354	0.231851	CLEC19A	-0.0645733	-23.1737	0.948514	0.99998
PNPLA5	0.211883	1.23216	0.832199	0.999942	AC122719.3	-1.22584	-2.89219	0.220259	0.410931	FGF2	-0.506609	-3.64657	0.612429	0.999148	AC010327.7	0.167011	1.61021	0.867361	0.99972	SCG5	1.53182	1.61405	0.125567	0.232101	LRMP	-0.0645733	-23.0608	0.948514	0.99998
AL078582.2	0.211842	1.08668	0.83223	0.999942	TNFAIP8L3	-1.22644	-2.45418	0.220034	0.410766	MUC21	-0.506658	-4.08815	0.612395	0.999148	IL12RB2	0.166995	1.53873	0.867374	0.99972	LINC02240	1.52288	4.16925	0.127788	0.235917	AL137186.2	-0.0645733	-23.0118	0.948514	0.99998
AC090186.1	0.20733	0.940003	0.835752	0.999942	ZNF19	-1.23051	-0.768064	0.218508	0.408171	LRRC8C-DT	-0.507117	-1.53277	0.612073	0.999148	C3orf35	0.166946	0.165619	0.867412	0.99972	APOLD1	1.52093	0.555414	0.128277	0.236674	APCDD1L-DT	-0.0645733	-23.1184	0.948514	0.99998
METTL24	0.206554	1.10003	0.836358	0.999942	DUOXA2	-1.23838	-1.54939	0.215576	0.402945	SGO1-AS1	-0.512735	-1.63116	0.608136	0.999148	AC003006.1	0.166132	0.593168	0.868053	0.99972	LINC02646	1.50827	2.66223	0.131486	0.242296	TRIM74	-0.0645733	-23.0262	0.948514	0.99998
ANKRD44	0.204039	0.123433	0.838323	0.999942	KCNQ1OT1	-1.24853	-0.079187	0.211837	0.396205	AC127526.2	-0.513054	-1.00507	0.607913	0.999148	AC211433.1	0.164274	0.191719	0.869515	0.99972	AC078881.1	1.50642	1.47959	0.131959	0.243019	KLHL29	-0.0646621	0.0997007	0.948443	0.99998
AC005480.1	0.203173	0.217553	0.839	0.999942	AC015660.2	-1.24873	-1.77899	0.211763	0.396205	AC022182.1	-0.513085	-1.01182	0.607892	0.999148	AC092115.3	0.163071	1.4931	0.870462	0.99972	AL132712.1	1.50424	3.38232	0.132519	0.2439	SEC14L2	-0.06517	-0.0919993	0.948039	0.99998
AC244517.1	0.201327	1.21169	0.840443	0.999942	LINC02832	-1.25429	-2.7428	0.209737	0.392766	CDH23	-0.513665	-2.56983	0.607486	0.999148	SPINK13	0.162667	0.198923	0.870781	0.99972	TYW1B	1.50002	1.06742	0.133608	0.245754	AC104459.1	-0.0651749	-0.208992	0.948035	0.99998
AC093817.2	0.201316	0.478104	0.840452	0.999942	C2CD4A	-1.25625	-1.73965	0.209026	0.391679	AC016747.4	-0.514339	-0.751578	0.607015	0.999148	PADI1	0.161906	-0.225797	0.87138	0.99972	RCAN2	1.49421	2.69362	0.13512	0.248382	AC131571.1	-0.0660083	-23.1829	0.947371	0.99998
AC107223.1	0.200886	0.337347	0.840788	0.999942	AC011921.1	-1.26904	-2.16706	0.204427	0.383301	AC116535.2	-0.516148	-24.2902	0.605751	0.999148	TRH	0.161513	0.424348	0.871689	0.99972	FAM110B	1.49155	1.33103	0.135817	0.249511	LINC02288	-0.0660083	-23.0586	0.947371	0.99998
FAM155A	0.20044	0.294183	0.841137	0.999942	MROH9	-1.26946	-2.13432	0.204277	0.383259	AC017083.3	-0.517709	-3.66466	0.604661	0.999148	SLC4A4	0.160843	0.256172	0.872217	0.99972	COL5A2	1.48783	3.17186	0.136795	0.251154	SHOC1	-0.0660083	-23.1323	0.947371	0.99998
AC017104.1	0.198714	1.11641	0.842487	0.999942	GRIA2	-1.26971	-1.97311	0.204188	0.383259	AC079760.1	-0.518299	-1.72902	0.60425	0.999148	AC027319.1	0.160782	0.944983	0.872265	0.99972	NOS1AP	1.48625	0.543406	0.137213	0.251766	EDDM13	-0.0660083	-23.2585	0.947371	0.99998
RAB15	0.198103	0.212269	0.842964	0.999942	CA3	-1.27239	-1.07725	0.203236	0.381783	GNAS-AS1	-0.518487	-0.939076	0.604119	0.999148	WFDC10B	0.160386	0.646682	0.872577	0.99972	AP003059.2	1.48149	4.48467	0.138476	0.2537	MAGI1	-0.0663781	-0.0469389	0.947077	0.99998
AC011477.3	0.197372	0.336786	0.843536	0.999942	AL591806.4	-1.27814	-1.33536	0.2012	0.378196	SFTPD	-0.519209	-2.58096	0.603615	0.999148	TBC1D24	0.159183	1.4777	0.873525	0.99972	SLC28A1	1.48132	4.37233	0.13852	0.2537	HMGA2-AS1	-0.0668022	-0.632233	0.946739	0.99998
ARHGAP28	0.196164	1.24271	0.844482	0.999942	COX6B2	-1.28207	-2.93111	0.199819	0.375835	KIAA2012	-0.520755	0.248368	0.602537	0.999148	LINC01342	0.158871	0.976611	0.87377	0.99972	STPG2	1.47783	1.36167	0.139452	0.255251	AL021997.3	-0.0674432	-23.0378	0.946229	0.99998
AP006545.3	0.195549	0.366259	0.844963	0.999942	LINC00635	-1.28977	-2.6099	0.197132	0.371014	LKAAEAR1	-0.521654	0.388949	0.601912	0.999148	AC063944.1	0.158812	0.952442	0.873817	0.99972	SPRY4-AS1	1.47522	0.781304	0.140155	0.25638	PIWIL2	-0.0674432	-23.0658	0.946229	0.99998
LINC02666	0.194841	0.111699	0.845517	0.999942	AC009690.1	-1.29397	-0.703396	0.195674	0.368502	AC104459.1	-0.522274	-1.91167	0.60148	0.999148	AP003086.1	0.157759	0.19301	0.874647	0.99972	AC099521.2	1.46812	5.2364	0.142071	0.259727	AL109741.1	-0.0674432	-23.1121	0.946229	0.99998
AC034195.1	0.193769	0.562539	0.846357	0.999942	AC079142.1	-1.29577	0.131967	0.195055	0.367565	GP6	-0.522655	-0.428714	0.601214	0.999148	PROCR	0.157372	0.327228	0.874951	0.99972	AL133353.2	1.45922	0.897217	0.144506	0.263912	AC104211.1	-0.0688782	-23.2148	0.945087	0.99998
AL132671.2	0.19321	0.849333	0.846794	0.999942	WDR17	-1.29688	-2.25605	0.194674	0.367078	AC138627.1	-0.52269	-1.12874	0.60119	0.999148	AL078604.4	0.157333	-0.0672398	0.874982	0.99972	TMCC3	1.45911	0.917661	0.144536	0.263912	AL356311.1	-0.0688782	-23.1039	0.945087	0.99998
AL117334.2	0.191835	1.31937	0.847871	0.999942	LINC02438	-1.30253	0.273356	0.192735	0.363651	SLC5A1	-0.523251	-3.78606	0.600799	0.999148	TMEM170A	0.156566	0.768495	0.875587	0.99972	AC008629.1	1.4586	2.31279	0.144676	0.264008	AC007563.2	-0.0688782	-23.2108	0.945087	0.99998
TVP23A	0.191143	0.369772	0.848413	0.999942	AC007000.4	-1.30829	0.30354	0.190775	0.360179	AL353151.2	-0.525226	-1.38128	0.599426	0.999148	AL138927.1	0.154789	0.81188	0.876988	0.99972	AC114778.2	1.45374	2.81352	0.146019	0.266295	AL391361.2	-0.0688782	-23.1696	0.945087	0.99998
AC026894.3	0.190989	1.36357	0.848534	0.999942	DPF1	-1.31772	-2.98449	0.187596	0.3544	DGAT2	-0.529228	-1.38646	0.596647	0.999148	NEGR1	0.154541	0.626316	0.877183	0.99972	AL683813.2	1.44646	1.41425	0.148048	0.269833	AC078795.1	-0.0688782	-23.0098	0.945087	0.99998
AL355802.3	0.190912	0.483492	0.848595	0.999942	PPP1R1C	-1.31933	-1.65511	0.18706	0.35361	Z97986.1	-0.530337	-2.77805	0.595878	0.999148	AC104459.1	0.154332	0.21205	0.877348	0.99972	AC112206.2	1.44592	2.09859	0.1482	0.269945	PTP4A1	-0.0688782	-23.1321	0.945087	0.99998
LINC00907	0.190116	0.441422	0.849218	0.999942	SCG5	-1.31954	-1.60541	0.186988	0.35361	PIK3IP1-AS1	-0.531837	-2.28201	0.594839	0.999148	C2orf92	0.153799	0.106829	0.877768	0.99972	SLC5A2	1.44415	3.05862	0.148696	0.270684	AC008892.1	-0.0688782	-23.0507	0.945087	0.99998
LINC01950	0.188036	0.952862	0.850848	0.999942	LINC02055	-1.31969	-1.61332	0.186937	0.35361	TNFSF13B	-0.534345	-3.70648	0.593103	0.999148	HLA-G	0.153492	0.340425	0.878011	0.99972	LINC01353	1.43882	4.27508	0.150201	0.273259	AL354822.1	-0.0688782	-23.2225	0.945087	0.99998
AC007743.1	0.187334	1.07218	0.851399	0.999942	TENM3	-1.32079	-1.08591	0.18657	0.353353	LINC01355	-0.534896	-1.7432	0.592722	0.999148	JPH2	0.153046	0.140156	0.878362	0.99972	AL161618.1	1.42924	3.36235	0.152937	0.278023	AC129492.1	-0.0688782	-23.1324	0.945087	0.99998
AP002812.2	0.18727	-0.0051784	0.851449	0.999942	PITPNM2	-1.3267	-1.45044	0.184609	0.349859	AC005258.1	-0.534987	-1.73364	0.592659	0.999148	AC104024.3	0.151421	1.55956	0.879644	0.99972	AC114763.1	1.429	1.58145	0.153005	0.278023	AC021055.1	-0.0689325	-1.15449	0.945043	0.99998
AC003006.1	0.186311	0.343568	0.8522	0.999942	PLCL2	-1.33503	-1.03625	0.181867	0.344881	FILIP1L	-0.535969	-3.00043	0.59198	0.999148	AC067930.4	0.151259	0.307503	0.879771	0.99972	AC068305.2	1.42301	4.07963	0.154735	0.280825	LINC01122	-0.069465	-0.0591889	0.944619	0.99998
AC053503.1	0.185945	0.673081	0.852488	0.999942	LINC02615	-1.33554	-1.01467	0.181701	0.344784	AC104078.2	-0.53675	-0.537982	0.59144	0.999148	PF4V1	0.151177	-0.245598	0.879836	0.99972	LINC02185	1.42255	3.92997	0.154867	0.280896	TPTE2	-0.0703132	-23.2676	0.943944	0.99998
RRH	0.185776	1.6351	0.85262	0.999942	PIP	-1.33809	-3.48652	0.180868	0.34342	SLC9C2	-0.536957	-1.00073	0.591297	0.999148	AC002553.2	0.151011	0.920164	0.879967	0.99972	STAT4	1.41686	4.00197	0.156523	0.283584	TSBP1-AS1	-0.0703132	-23.1092	0.943944	0.99998
AC007619.1	0.184152	0.508352	0.853894	0.999942	AL137009.2	-1.34283	-0.707607	0.179327	0.34071	AC006008.1	-0.539256	-0.632328	0.58971	0.999148	MMP10	0.150289	0.513844	0.880536	0.99972	KSR1	1.41681	0.846738	0.156538	0.283584	SGO1-AS1	-0.0709049	-0.149442	0.943473	0.99998
AL157400.3	0.183834	0.240706	0.854144	0.999942	CXCL10	-1.34446	-0.852857	0.178799	0.339922	SLC2A3	-0.541421	-2.88588	0.588217	0.999148	ZNF559-ZNF177	0.147645	0.283755	0.882623	0.99972	AC022463.1	1.41034	3.84669	0.15844	0.286671	APOLD1	-0.0713241	-0.123103	0.94314	0.99998
AL096803.2	0.182801	0.232219	0.854954	0.999942	AC009061.2	-1.34899	-1.17656	0.177341	0.337365	AC025048.4	-0.542916	-2.23706	0.587188	0.999148	CFLAR-AS1	0.147465	0.0206611	0.882765	0.99972	TEX26	1.40987	4.81437	0.158578	0.286671	MASP2	-0.0717481	-23.1996	0.942802	0.99998
AL139317.5	0.182352	0.0476412	0.855306	0.999942	LINC02614	-1.35356	-2.08648	0.175876	0.334789	AP003100.2	-0.542922	-2.23212	0.587184	0.999148	DKK2	0.147438	1.1302	0.882786	0.99972	AL132990.1	1.40974	4.45719	0.158618	0.286671	ADH6	-0.0717481	-23.1795	0.942802	0.99998
NEGR1	0.181989	0.413222	0.855591	0.999942	AC078881.1	-1.36212	-1.30349	0.173159	0.329826	LINC01843	-0.543416	-0.686445	0.586844	0.999148	GMFG	0.14741	1.14276	0.882808	0.99972	MARCHF4	1.40971	4.54242	0.158625	0.286671	ALDH16A1	-0.0717481	-23.1451	0.942802	0.99998
AC007938.3	0.181286	1.31139	0.856143	0.999942	UBAP1L	-1.36278	-1.04265	0.172952	0.329642	AC011379.2	-0.546168	-0.964122	0.58495	0.999148	CECR2	0.147379	1.15669	0.882833	0.99972	FREM1	1.38718	1.51449	0.165387	0.297994	KCNIP4	-0.0717481	-23.1041	0.942802	0.99998
EBF1	0.181189	0.458564	0.856219	0.999942	IKZF2	-1.36802	-0.188003	0.171304	0.326709	AC021231.1	-0.547045	-2.95763	0.584348	0.999148	KCNN2	0.146968	0.754487	0.883157	0.99972	AL356124.1	1.38355	2.28809	0.166496	0.299813	AL109811.1	-0.0731831	-23.2344	0.94166	0.99998
AC099489.1	0.180655	0.278078	0.856639	0.999942	CLEC4E	-1.37484	-2.12933	0.169181	0.322865	COX6B2	-0.547206	-0.376895	0.584237	0.999148	AC084757.4	0.145722	1.80247	0.884141	0.99972	C1orf137	1.38075	5.29689	0.167355	0.301179	AL359198.1	-0.0731831	-23.1853	0.94166	0.99998
LRRN1	0.180541	0.470102	0.856728	0.999942	MIR193BHG	-1.37599	-1.38072	0.168824	0.322388	STX16-NPEPL1	-0.548531	-2.36893	0.583327	0.999148	AC053503.1	0.144559	0.500314	0.885059	0.99972	C15orf48	1.3795	0.392904	0.167741	0.301692	AC079760.1	-0.0732225	-1.22679	0.941629	0.99998
CCL7	0.179814	2.67972	0.857298	0.999942	SLC26A5	-1.38183	-1.97086	0.167024	0.319154	ENOX1	-0.54888	-1.26508	0.583088	0.999148	TPBGL	0.144058	-0.0124398	0.885455	0.99972	ISM1	1.37587	3.15784	0.168861	0.303525	AC122719.3	-0.0739967	-0.333536	0.941013	0.99998
PLAC8L1	0.179809	0.63581	0.857302	0.999942	AC004771.3	-1.38779	-2.91747	0.165201	0.315871	AC244131.2	-0.555888	-1.22584	0.578287	0.999148	AC008758.1	0.144036	0.202547	0.885472	0.99972	CUBN	1.3745	1.58566	0.169287	0.304109	KIF3C	-0.074051	-0.961829	0.94097	0.99998
MASP2	0.179802	0.625465	0.857308	0.999942	PGBD5	-1.38916	-1.9171	0.164785	0.315277	TNFRSF11B	-0.558087	-2.948	0.576785	0.998474	AC017002.4	0.143533	1.20336	0.885869	0.99972	LRP5L	1.37343	0.57546	0.169617	0.304519	INKA1	-0.0746181	-23.3117	0.940519	0.99998
AC004594.1	0.179095	0.683029	0.857863	0.999942	EML6	-1.39064	-1.31261	0.164333	0.314613	SATB2	-0.558654	-0.859093	0.576398	0.99838	AC124312.5	0.142425	0.423544	0.886744	0.99972	LY6H	1.37103	4.72175	0.170366	0.305602	TTC3-AS1	-0.0746181	-23.3245	0.940519	0.99998
AL137186.2	0.17904	0.658927	0.857906	0.999942	AC010754.1	-1.39548	-2.26887	0.16287	0.312011	SMIM41	-0.5592	0.102679	0.576025	0.998311	CACNA2D3	0.142145	0.277746	0.886965	0.99972	MEP1A	1.37084	4.59332	0.170424	0.305602	FGF21	-0.0746181	-23.1719	0.940519	0.99998
AC007656.2	0.178798	0.421628	0.858096	0.999942	AC002074.1	-1.39623	-1.94061	0.162647	0.311783	LINC00265	-0.559965	-1.2894	0.575503	0.997982	Z98742.4	0.141883	2.06799	0.887173	0.99972	MPPED2	1.36752	0.122077	0.171463	0.307281	LINC02241	-0.0746181	-23.2752	0.940519	0.99998
CACNA2D3	0.177612	0.378893	0.859028	0.999942	ADAMTS9	-1.39624	-0.262729	0.162641	0.311783	TMEM72-AS1	-0.560014	-1.31452	0.57547	0.997982	AC016526.2	0.141808	1.7005	0.887232	0.99972	ANGPTL4	1.36638	0.606547	0.17182	0.307737	AC004830.2	-0.0746181	-23.2134	0.940519	0.99998
AL365273.2	0.176849	1.21682	0.859627	0.999942	AC007611.1	-1.40159	-3.10402	0.161038	0.309093	TMEM132C	-0.562097	-3.85499	0.57405	0.996615	CEMIP	0.141086	-0.0908448	0.887802	0.99972	MCC	1.3639	1.36135	0.1726	0.30895	AP003059.2	-0.0746181	-23.1784	0.940519	0.99998
GPC5-AS1	0.176557	0.338014	0.859857	0.999942	LY6D	-1.40243	-2.63161	0.160788	0.308812	TBC1D10A	-0.562954	-1.09464	0.573466	0.996178	AC005920.2	0.1407	0.501853	0.888107	0.99972	NNMT	1.36162	0.340939	0.173318	0.310051	DGAT2	-0.0752049	-0.5535	0.940052	0.99998
AC090907.1	0.176125	1.58977	0.860196	0.999942	LINC01732	-1.40811	-3.82258	0.159099	0.305763	AC092574.2	-0.563634	-2.91913	0.573004	0.99595	AL118556.2	0.139676	1.26473	0.888916	0.99972	SPX	1.35573	2.55879	0.175186	0.313205	AC008056.1	-0.076053	-23.3681	0.939377	0.99998
AL133480.1	0.176013	1.13797	0.860284	0.999942	RGN	-1.40932	-2.42675	0.15874	0.30527	AL157400.3	-0.564018	-1.47701	0.572742	0.99595	FAM209A	0.13966	1.16448	0.888928	0.99972	RGS2	1.35436	0.395017	0.175621	0.313755	AP000688.1	-0.076053	-23.2239	0.939377	0.99998
SLC14A2-AS1	0.175272	0.547929	0.860866	0.999942	PGF	-1.41668	-2.50118	0.156576	0.301301	TCTEX1D4	-0.564666	0.435925	0.572301	0.995884	CLEC6A	0.139574	1.03234	0.888997	0.99972	RARRES2	1.35411	1.70966	0.175703	0.313755	SLC14A2-AS1	-0.076053	-23.4485	0.939377	0.99998
LINC01290	0.17499	0.140542	0.861088	0.999942	LINC02320	-1.4174	-0.262488	0.156367	0.301092	ZNF503	-0.565094	-2.36175	0.57201	0.995884	PRR26	0.139408	0.113236	0.889128	0.99972	UTS2B	1.34344	3.19256	0.17913	0.319495	WFDC10B	-0.076053	-23.2601	0.939377	0.99998
AL109930.1	0.174645	-0.189454	0.861358	0.999942	TOX	-1.4187	-1.29643	0.155986	0.300551	AC122719.3	-0.566711	-0.472299	0.570911	0.994618	AC008770.2	0.139136	0.689686	0.889343	0.99972	CXCL8	1.33893	-0.0838223	0.180592	0.321912	AC022335.1	-0.076053	-23.2495	0.939377	0.99998
CXCL11	0.171673	0.518033	0.863695	0.999942	FCMR	-1.4297	-3.0813	0.152804	0.294609	AC092647.5	-0.566921	-0.667698	0.570768	0.994618	AC104211.1	0.139018	0.502859	0.889436	0.99972	AC079336.4	1.3224	4.59886	0.186037	0.331419	CHODL	-0.0762601	-1.38718	0.939212	0.99998
AC002064.2	0.171672	0.164286	0.863696	0.999942	MAP7D2	-1.43818	-2.13074	0.150382	0.290126	DYDC1	-0.567535	0.446987	0.570351	0.994618	AC131934.1	0.138036	0.0880895	0.890212	0.99972	ZNF782	1.3213	0.483912	0.186402	0.331874	LINC01355	-0.0767532	-0.709688	0.93882	0.99998
F2RL3	0.171558	1.05967	0.863785	0.999942	C10orf67	-1.44403	-2.87479	0.14873	0.287124	AP000446.1	-0.569894	-1.73856	0.56875	0.992582	AL161757.5	0.137929	1.70676	0.890296	0.99972	ASAP1	1.32033	0.0363921	0.186726	0.332253	AC090673.1	-0.077483	-1.16156	0.938239	0.99998
AL109811.1	0.170151	0.560639	0.864892	0.999942	GRIK2	-1.44723	-1.14078	0.147832	0.285573	ALDH1A2	-0.570698	-2.41148	0.568205	0.992208	AC010636.2	0.136513	0.147828	0.891416	0.99972	GNG12-AS1	1.31928	1.68021	0.187074	0.332564	AC013652.1	-0.077488	-23.42	0.938235	0.99998
AL359704.3	0.169346	3.40689	0.865525	0.999942	CCPG1	-1.46157	-0.714694	0.143858	0.278076	AC023509.6	-0.572248	-2.09018	0.567154	0.991528	F2RL3	0.135724	1.15185	0.892039	0.99972	AC100781.1	1.31914	4.40313	0.187123	0.332564	C16orf95	-0.077488	-23.2448	0.938235	0.99998
AP003068.1	0.167995	1.0267	0.866587	0.999942	ANKRD44	-1.4664	-1.96966	0.142538	0.275702	LINC02055	-0.572773	-0.166803	0.566799	0.991484	CMTM2	0.135717	1.09794	0.892045	0.99972	AC104695.2	1.31685	1.92432	0.18789	0.33373	AL451007.2	-0.077488	-23.2529	0.938235	0.99998
AC073878.1	0.167952	1.01792	0.866621	0.999942	KIF17	-1.46782	-1.4304	0.142154	0.275136	ERICH6	-0.573765	-0.600442	0.566127	0.990887	CPEB2-DT	0.135673	1.08301	0.89208	0.99972	AL357052.1	1.31311	2.99365	0.189145	0.33576	PPP2R2C	-0.077488	-23.2081	0.938235	0.99998
AP001160.1	0.167608	0.270486	0.866892	0.999942	GPR137C	-1.4759	-0.885785	0.13997	0.271085	STEAP4	-0.577771	-2.18247	0.563419	0.986723	TSBP1-AS1	0.135022	0.537942	0.892594	0.99972	SRPK3	1.30723	3.19234	0.191134	0.33889	AL157834.4	-0.077488	-23.3708	0.938235	0.99998
FGF2	0.167428	0.24885	0.867034	0.999942	HMGA1P4	-1.48795	-0.385687	0.136765	0.265048	TDRD9	-0.57841	0.177593	0.562988	0.986544	NTNG1	0.134829	0.482329	0.892747	0.99972	FLRT1	1.30687	3.47443	0.191255	0.338905	LINC00907	-0.077488	-23.3701	0.938235	0.99998
ARNILA	0.167081	0.989609	0.867306	0.999942	SCGB2B2	-1.48832	-0.359931	0.136666	0.265028	AC139530.2	-0.580241	-2.87078	0.561752	0.984954	AC008937.2	0.133956	1.33665	0.893438	0.99972	IL23R	1.30633	4.15624	0.19144	0.339033	AC005258.1	-0.0776704	-1.49364	0.93809	0.99998
KBTBD12	0.166483	0.481737	0.867777	0.999942	PAK3	-1.49484	-1.69777	0.134957	0.261884	TRPV4	-0.581996	-0.513045	0.56057	0.983455	STPG2	0.132025	-0.219004	0.894964	0.99972	LINC01088	1.30406	2.26574	0.192213	0.3402	GAL	-0.0780896	-0.444282	0.937757	0.99998
SIAH2-AS1	0.166136	0.371317	0.86805	0.999942	AC023421.2	-1.50273	-1.44855	0.132909	0.258075	BCAS1	-0.583246	-0.370681	0.559728	0.982553	AL627309.1	0.131796	1.02468	0.895145	0.99972	NR6A1	1.30337	1.04526	0.192449	0.340253	CNN1	-0.078923	-23.3307	0.937094	0.99998
AC112206.2	0.16579	0.100218	0.868322	0.999942	EREG	-1.50365	-1.50749	0.132673	0.257784	AL109930.1	-0.588948	-2.228	0.555896	0.976398	AC073167.1	0.131702	0.850578	0.89522	0.99972	AL109741.1	1.30331	4.09125	0.19247	0.340253	AL109955.2	-0.078923	-23.3977	0.937094	0.99998
LINC02831	0.165597	1.39443	0.868474	0.999942	RNF217-AS1	-1.51035	-1.26498	0.130953	0.254607	CFAP58	-0.591972	0.387484	0.553869	0.973408	GRID2	0.128574	-0.0984108	0.897695	0.99972	ZFAT	1.30072	0.696563	0.193354	0.341614	AC129102.1	-0.078923	-23.3637	0.937094	0.99998
MIR646HG	0.165592	1.49305	0.868478	0.999942	PRKD1	-1.51044	-0.754759	0.130932	0.254607	AC112206.2	-0.594698	-1.30764	0.552045	0.970771	AC023389.2	0.127872	0.928872	0.89825	0.99972	FILIP1L	1.29964	2.23542	0.193724	0.342029	CALML3-AS1	-0.078923	-23.3155	0.937094	0.99998
AL078644.2	0.163206	0.260261	0.870356	0.999942	2024-12-01	-1.51051	-0.987412	0.130915	0.254607	C2	-0.597345	-1.62516	0.550277	0.968229	LINC00299	0.126638	0.280079	0.899227	0.99972	AC005410.2	1.29047	2.58624	0.196889	0.347043	NPIPB12	-0.078923	-23.2953	0.937094	0.99998
AC002064.3	0.161893	1.04026	0.87139	0.999942	CCDC184	-1.52035	-4.49455	0.128422	0.250172	AC008269.1	-0.599922	-2.06976	0.548558	0.965772	CHODL	0.126577	0.0306402	0.899275	0.99972	INKA1	1.28713	3.90148	0.198051	0.348691	AC068305.2	-0.078923	-23.2435	0.937094	0.99998
AC009060.1	0.161831	0.96382	0.871439	0.999942	KSR1	-1.5291	-0.309075	0.126241	0.246083	CTXN1	-0.600885	0.230804	0.547916	0.965208	AC123595.3	0.126167	1.3966	0.8996	0.99972	AL360268.1	1.28711	5.2457	0.198056	0.348691	AC105001.1	-0.078923	-23.3161	0.937094	0.99998
AC012409.2	0.161117	0.386523	0.872002	0.999942	DISC1	-1.55951	-0.87057	0.118876	0.231878	LINC01732	-0.6023	-0.448438	0.546974	0.964318	CUX2	0.126143	1.34661	0.899619	0.99972	LINC00637	1.27166	2.84574	0.203495	0.357845	AP003174.1	-0.0803579	-23.2408	0.935953	0.99998
ADAMTSL4-AS2	0.161042	0.145702	0.87206	0.999942	CD14	-1.56314	-3.70557	0.11802	0.230359	AC010197.1	-0.602456	-3.1722	0.546871	0.964318	RFX2	0.124268	-0.448597	0.901103	0.99972	AL135978.2	1.27066	3.43442	0.203849	0.358258	AL121974.1	-0.0803579	-23.3141	0.935953	0.99998
LINC02680	0.160202	0.301747	0.872722	0.999942	EPM2A	-1.56486	-1.80807	0.117615	0.229718	CCR7	-0.602764	-1.59069	0.546666	0.964318	ARNILA	0.124086	1.07561	0.901247	0.99972	LINC01505	1.26729	0.741695	0.20505	0.360159	LINC01754	-0.0803579	-23.2902	0.935953	0.99998
VNN1	0.158028	-0.182921	0.874435	0.999942	PLAT	-1.57896	-2.43302	0.114345	0.223476	SAXO1	-0.603038	-0.711958	0.546483	0.964318	AC025442.2	0.123191	0.274048	0.901956	0.99972	AC008462.1	1.26281	1.84263	0.206656	0.362555	DST-AS1	-0.0803579	-23.3822	0.935953	0.99998
PTPN20	0.157847	0.478583	0.874577	0.999942	AL353138.1	-1.58022	-1.13437	0.114057	0.223058	CCDC62	-0.603041	-1.09537	0.546481	0.964318	AL034351.4	0.122268	1.2942	0.902687	0.99972	ALDH1A2	1.26146	2.20339	0.207143	0.363197	LRP1B	-0.0803579	-23.3953	0.935953	0.99998
AL031587.2	0.157441	0.873917	0.874897	0.999942	AL391840.1	-1.58635	-1.83983	0.11266	0.22047	PHEX	-0.603093	-1.08213	0.546447	0.964318	THSD7B	0.121949	-0.251782	0.90294	0.99972	AC092171.3	1.26105	1.44696	0.207291	0.363243	PAK3	-0.0811321	-0.0859772	0.935337	0.99998
AC021236.1	0.157439	0.360612	0.874899	0.999942	OLFM4	-1.60954	-1.4183	0.107498	0.210505	AC010636.2	-0.605423	-2.0871	0.544898	0.964318	AC009318.3	0.121895	0.809402	0.902982	0.99972	DMKN	1.25872	1.8776	0.20813	0.364501	CDKL2	-0.0812011	-0.250154	0.935282	0.99998
MUC20	0.156686	1.11675	0.875492	0.999942	GREB1L	-1.61781	-0.301813	0.105703	0.207125	SIAH2-AS1	-0.606469	-3.85294	0.544203	0.96376	ZMAT4	0.121749	0.686488	0.903098	0.99972	AC131953.2	1.25308	2.74268	0.210175	0.367868	AC053503.1	-0.0817929	-23.4032	0.934811	0.99998
AC103923.1	0.156623	0.376145	0.875542	0.999942	LINC02649	-1.61999	-0.425676	0.105234	0.206342	ARHGAP31	-0.606487	-3.96997	0.544191	0.96376	GPC5-AS1	0.121219	0.393788	0.903518	0.99972	AL391361.2	1.25163	3.96217	0.210703	0.368577	AL135978.2	-0.0817929	-23.4251	0.934811	0.99998
SGO1-AS1	0.156254	0.110333	0.875833	0.999942	LINC00592	-1.62103	-2.07811	0.105012	0.206041	AC107032.2	-0.607991	-2.98028	0.543194	0.963645	AP002812.2	0.119846	0.0228082	0.904605	0.99972	LINC01226	1.24497	3.23747	0.213142	0.372625	MRPS9-AS2	-0.0817929	-23.3608	0.934811	0.99998
AC004900.1	0.155936	1.44679	0.876084	0.999942	RBM14-RBM4	-1.62941	-0.897011	0.103226	0.202668	ERICH3-AS1	-0.608073	-0.354547	0.543139	0.963645	AC022335.1	0.119503	0.508142	0.904877	0.99972	SCN11A	1.2433	2.09344	0.213758	0.373484	STAT4	-0.0817929	-23.3373	0.934811	0.99998
AC007610.2	0.155155	1.78307	0.876699	0.999942	NR6A1	-1.62942	-0.919028	0.103225	0.202668	LINC00624	-0.609793	-1.30797	0.541999	0.963268	MASP1	0.119488	0.0592437	0.904889	0.99972	AP001372.1	1.24183	3.81233	0.214299	0.374012	APBA1	-0.0817929	-23.3989	0.934811	0.99998
AL451049.1	0.155143	1.7526	0.876709	0.999942	DNM3	-1.6366	-0.944145	0.101715	0.199963	AL451042.1	-0.609801	-1.35021	0.541994	0.963268	PRKCQ	0.119326	0.368878	0.905017	0.99972	AL157829.1	1.2418	2.79444	0.214309	0.374012	AC026464.3	-0.0817929	-23.3673	0.934811	0.99998
AC002553.2	0.154452	0.563392	0.877253	0.999942	PLPP3	-1.64291	-1.31277	0.100402	0.197511	AC027808.1	-0.611104	-2.22322	0.541131	0.962896	AL022328.1	0.118389	1.37554	0.905759	0.99972	AL049869.3	1.2348	1.70342	0.216905	0.378239	MIR548A1HG	-0.0817929	-23.2732	0.934811	0.99998
LINC00462	0.154426	3.26537	0.877274	0.999942	THSD7B	-1.64956	-0.656847	0.0990338	0.194948	UPP2	-0.612695	-1.11345	0.540078	0.962135	AC009509.2	0.118358	1.34598	0.905784	0.99972	ALG13-AS1	1.23459	1.41622	0.216983	0.378239	AC093898.1	-0.0817929	-23.3368	0.934811	0.99998
CDK5R1	0.154233	0.180672	0.877426	0.999942	MIR100HG	-1.66156	-0.419828	0.0966007	0.190284	FRMPD2	-0.615643	0.393587	0.53813	0.959233	AC007493.2	0.118346	1.24754	0.905794	0.99972	AC073316.1	1.23214	4.68023	0.217895	0.379482	AL353151.2	-0.0827199	-0.909983	0.934074	0.99998
LINC02449	0.153793	0.778732	0.877773	0.999942	CHN1	-1.66422	-1.38325	0.0960686	0.18936	AL391840.1	-0.622564	-0.0819254	0.533571	0.951673	CACNB4	0.118287	0.976789	0.905841	0.99972	AC013652.1	1.232	3.43145	0.217949	0.379482	AC005920.2	-0.0832278	-23.2944	0.93367	0.99998
AL691447.2	0.152987	0.826102	0.878409	0.999942	TMEM200A	-1.67693	-2.3426	0.0935558	0.184528	WDR17	-0.62475	-0.466961	0.532135	0.949676	AC009690.1	0.117701	-0.181453	0.906305	0.99972	CDKN3	1.23155	-0.0862109	0.218119	0.379557	MED12L	-0.0832278	-23.3796	0.93367	0.99998
SFMBT2	0.15288	0.602022	0.878493	0.999942	AC009226.1	-1.67837	-0.869325	0.093274	0.184093	ARHGAP24	-0.628019	-1.3034	0.529991	0.946413	SAXO1	0.117255	-0.0107261	0.906658	0.99972	AC078845.1	1.22942	1.05242	0.218914	0.38072	AL683813.2	-0.0845149	-0.345723	0.932647	0.99998
FCER1G	0.151406	0.962712	0.879656	0.999942	CHL1	-1.67868	-1.18469	0.0932153	0.184093	MMADHC-DT	-0.62866	-3.86231	0.529572	0.946227	FAM95C	0.117206	0.323606	0.906697	0.99972	TP63	1.22866	3.0112	0.219199	0.380996	AC022463.1	-0.0846628	-23.4134	0.932529	0.99998
AC092111.1	0.150697	1.4442	0.880215	0.999942	KLF2	-1.68386	-2.2885	0.0922081	0.18223	AC090673.1	-0.630157	-2.91338	0.528592	0.945039	LINC02101	0.116612	1.96233	0.907167	0.99972	AC005914.1	1.22574	3.00974	0.220295	0.382678	AC137770.1	-0.0846628	-23.5302	0.932529	0.99998
[truncated: 1,510 more rows]
