# Supplementary material for: Impairment of FBXO31-mediated Ubiquitination of OGT Upregulates O-GlcNAcylation to Advance Endometrial Malignancy
Source: Research Square preprint supplement (doi:10.21203/rs.3.rs-4019799/v1), 2024-04-12
Supplement: Supplementary file 3 [file 2a8a072951d47a7e61b7020e.xlsx]

## Sheet: Sheet1
Supplementary Table 8. Primers for plasmid constructs, and RT-qPCR
Primers for plasmid constructs
Oligo	Sequence (5'-3')
FBXO31-cDNA-F	TGGCGGCCGCGATGGCGGTGTGTGCTCGCCTTTG
FBXO31-cDNA-R	CCTCTAGACTAGGAGGTGAGGGACTGAATG
shFBXO31-F	CCGGGATTGTGAAGAAGGATGAGTTCTCGAGAACTCATCCTTCTTCACAATCTTTTTTG
shFBXO31-R	AATTCAAAAAAGATTGTGAAGAAGGATGAGTTCTCGAGAACTCATCCTTCTTCACAATC
shFBXO31-2-F	CCGGGCTCAAGAACATTCAGTCCCTCTCGAGAGGGACTGAATGTTCTTGAGCTTTTTTG
shFBXO31-2-R	AATTCAAAAAAGCTCAAGAACATTCAGTCCCTCTCGAGAGGGACTGAATGTTCTTGAGC
Gibson-OGT-F	CAAAGACGATGACGATAAAGCTAGCATGGCGTCTTCCGTG
Gibson-OGT-R	ATCCTTCGCGGCCGCGGATCCTTATGCTGACTCAGTGACT
Gibson-OGT-2-F	AAGACGATGACGATAAAGATGGCTTCAAGTGTGGGTAATGT
Gibson-OGT-2-R	GCAGATCCTTCGCGGCCGCGTTACGCGCTTTCGGTCACTTCC
KO-ck-F	GTTTTGCACTCGGCATCAC
KO-ck-R	CCCTAACCGCCTCAAATACC
FBXO31-△F-F	GCCGCCGCCCCCGTGCCGTGAGGAGTATGGTGTTTG
FBXO31-△F-R	CCTCACGGCACGGGGGCGGCGGCGAGGGG
OGT-BamHI-F	CGCGGATCCATGGCTTCAAGTGTGGGTAA
OGT-XhoI-R	CCGCTCGAGTTACGCGCTTTCGGTCACTT
OGT-XbaI-R	GCTCTAGATTACGCGCTTTCGGTCACTT
XbaI-FBXO31-F	GCTCTAGAATGGCGGTGTGTGCTCGCCTTT
AgeI-FBXO31-R	GACCGGTATGGAGGTGAGGGACTGAATGTTC
sgFBXO31-1-F	CACCGGCGCATCGAGGCTAGCGCCG
sgFBXO31-1-R	AAACCGGCGCTAGCCTCGATGCGCC
sgFBXO31-2-F	CACCGGCGACGGGCCCACGCCGCAA
sgFBXO31-2-R	AAACTTGCGGCGTGGGCCCGTCGCc
sgFBXO31-3-F	CACCGGGCGCCGACATCCGCGCGAC
sgFBXO31-3-R	AAACGTCGCGCGGATGTCGGCGCCc
Primers for RT-qPCR
Oligo	Sequence (5'-3')
ACTIN-F	TCCCTGGAGAAGAGCTACGA
ACTIN-R	AGCACTGTGTTGGCGTACAG
FBXO31-F	AGGCCAGGCTTGATGAGGT
FBXO31-R	ATCTTCCACGAGCACATGCAG
OGT-F	CATCGAGAATATCAGGCAGGAG
OGT-R	CCTTCGACACTGGAAGTGTATAG
PAEP-F	AGGTTGGCAGGGACCTGGCACTC
PAEP-R	ACGGCACGGCTCTTCCATCTGTT
SSEA-F	TGGCATGTAGGAAGCACCTG
SSEA-R	GCACGTGGAACTAGGAGGTC
OCT4-F	CGACCATCTGCCGCTTTG
OCT4-R	GCCGCAGCTTACACATGTTCT
ALDH1-F	CTGTGTTCCAGGAGCCGAAT
ALDH1-R	AGCATCCATAGTACGCCACG
CD133-F	AAGCATTGGCATCTTCTATGG
CD133-R	AAGCACAGAGGGTCATTGAGA
SOX2-F	TGCGAGCGCTGCACAT
SOX2-R	TCATGAGCGTCTTGGTTTTCC
SOX9_F	GGAGGAAGTCGGTGAAGAACG
SOX9_R	GTCTTGATGTGCGTTCGCTG
