# Supplementary material for: Impairment of FBXO31-mediated Ubiquitination of OGT Upregulates O-GlcNAcylation to Advance Endometrial Malignancy
Source: Research Square preprint supplement (doi:10.21203/rs.3.rs-4019799/v1), 2024-04-12
Supplement: Supplementary file 4 [file 4699d25a208da3ec8d58ce17.xlsx]

## Sheet: Sheet1
Supplementary Table 9. Antibodies for immunostaining and WB
Antigen	Catalogue #	Host	Company	Dilution
Acetylated-α tubulin	T7451	Mouse monoclonal	Sigma Aldrich	1/200
O-GlcNAc（RL2)	MA1-072	Mouse monoclonal	Cell Signaling	1/200 (IHC, IF)
O-GlcNAc（RL2)	ab2739	Mouse monoclonal	Abcam	1/1000 (WB)
Estrogen Receptor-α	SC-8002	Mouse monoclonal	Santa cruz	1/200
Progesterone Receptor	ab16661	Rabbit monoclonal	Abcam	1/200
Ki-67	9449S	Mouse monoclonal	Cell Signaling	1/200
P53	2524S	Mouse monoclonal	Cell Signaling	1/200
FBXO31	ab86137	Rabbit polyclonal	Abcam	1/1000 (WB)
FBXO31	PA5-56368	Rabbit polyclonal	Thermo Fisher Scientific	1/50 (IHC)
OGT	ab96718	Rabbit polyclonal	Abcam	1/200
β-Actin	GB12001	Mouse monoclonal	Servicebio	1/1000
Tubulin	ab37150	Mouse monoclonal	Abcam	1/200
HA	ab5706	Rabbit polyclonal	Abcam	0.025
Ub	3936S	Mouse monoclonal	Cell Signaling	1/1000
Flag	14792S-100U	Rabbit monoclonal	Cell Signaling	1/1000
GFP	ab290	Rabbit polyclonal	Abcam	1/1000
PH3	9701S	Rabbit polyclonal	Cell Signaling	1/200
FOXA2	ab108422	Rabbit monoclonal	Abcam	1/200
PAEP	ab53289	Rabbit monoclonal	Abcam	1/200
OGA	14711-1-AP	Rabbit polyclonal	Proteintech	1/200
SOX9	ab31392	Rabbit polyclonal	Abcam	1/500
Alexafluor 568	A31572	Donkey polyclonal	Thermo Fisher Scientific	1/500
Alexafluor 568	A31570	Donkey polyclonal	Thermo Fisher Scientific	1/500
Alexafluor 488	A21206	Donkey polyclonal	Thermo Fisher Scientific	1/500
Alexafluor 488	A21202	Donkey polyclonal	Thermo Fisher Scientific	1/500
Alexafluor 647 Phalloidin	A22287	/	Thermo Fisher Scientific	1/100
