# Supplementary material for: Impairment of FBXO31-mediated Ubiquitination of OGT Upregulates O-GlcNAcylation to Advance Endometrial Malignancy
Source: Research Square preprint supplement (doi:10.21203/rs.3.rs-4019799/v1), 2024-04-12
Supplement: Supplementary file 5 [file 73e56ad20a2efe59466d7df5.xlsx]

## Sheet: Sheet1
Supplementary table 1. TPM of 1000 O-GlcNAc correlated genes from 55 EC tissues
ID	LINC01515	LINC01597	ARHGEF38	ABCC12	SPATA6L	CFAP70	CYP3A5	ACAT2	PKHD1	TOB1_AS1	ZNF19	ZNF487	MIR6772	DNAJB13	LINC00963	RRP12	SHANK1	MORN1	ZNF311	SIAE	LINC00240	PYROXD2	FBXO5	WDR76	COLQ	LRRC27	DLG5	DPCD	ZBED3_AS1	LETMD1	RRAD	KCNK6	LINC01277	DNAH6	IFT74	BEND7	HUS1	FANK1	TMPO	MORN4	MKLN1_AS	ZNF248	ZNF765	ATOH7	ZFYVE27	EBF3	HSPB11	URB1	GUCA1B
E100	0.162031	4.78228	10.7437	0.0359323	8.84872	4.45456	28.1831	12.8019	3.64939	2.2107	3.27673	1.92674	83.3489	21.2062	19.7203	31.1466	1.08473	9.84964	0.783802	27.7314	0.760418	43.3371	9.86814	8.42124	11.3189	4.5767	0	64.3527	0.454865	68.5068	86.1845	28.0785	0.425385	1.15786	9.2363	7.063	13.8321	20.8567	50.008	18.9703	1.12158	18.8273	4.23428	2.57527	101.789	4.26035	18.1005	32.7134	24.7525
E152	0.772013	3.52466	29.4228	0.256805	20.6264	28.1055	6.2459	16.2522	6.53868	1.52611	7.5077	18.1349	59.5687	257.995	17.3237	49.6906	15.1112	17.9629	0	50.6495	5.69882	66.6635	10.1341	6.19099	13.6545	23.565	0.181543	170.404	1.55156	72.2092	174.824	11.8983	0.380023	23.7205	28.9889	9.43319	19.9849	118.889	65.0877	31.2388	1.35983	62.3983	1.46678	6.06536	103.89	1.04561	28.7473	73.4647	17.6344
E155	0.512192	7.72199	13.2392	0.690717	12.2927	9.81163	14.9575	27.3545	4.90667	4.17231	4.29799	5.13231	25.6351	81.1331	12.7526	30.361	25.8558	8.61061	2.66898	34.0828	4.71002	47.3304	14.7499	7.28457	6.74944	12.0076	0	101.227	1.71696	88.4876	40.1366	3.8569	0.915832	10.2586	34.2318	9.66684	17.0039	26.0498	72.1089	28.9552	2.03279	40.5417	3.78733	3.96031	78.0559	1.58391	32.0197	26.778	15.2982
E157	0.742922	3.89753	7.39555	0.355864	12.7648	6.51028	5.47115	18.6843	1.83405	1.16106	3.78605	9.71135	27.5155	102.465	12.9368	32.003	7.63751	13.1255	1.57099	36.7645	3.31223	54.6751	8.82932	6.22617	13.3134	13.1436	0.0279523	97.0229	1.09209	61.2104	156.74	12.2291	0.42129	6.55887	23.5138	9.50155	19.4491	40.4555	60.5095	38.6736	1.52072	44.1597	2.66255	4.05759	93.1909	4.01841	22.1637	43.7415	12.0244
E159	0.530019	0	2.76239	0	2.82467	4.09817	2.02972	13.1814	0.0193616	2.00402	4.10029	7.38446	47.4926	12.9378	16.855	21.4221	6.66372	9.14541	0.31901	12.2482	0.521552	32.855	12.1742	8.99711	18.9026	7.78235	0.0321643	38.346	0.687231	72.0577	129.099	53.2212	0.0807954	4.14846	18.9816	7.57952	28.2992	7.74183	51.545	29.04	0.951016	50.4433	4.95125	2.001	69.8144	2.75657	21.4589	80.4261	24.9946
E165	0	0.6707	24.115	0	0.677862	3.05862	20.9823	17.9542	1.87285	0.986507	1.64898	3.90855	140.273	16.8533	5.28321	26.1099	0.546718	5.65311	0	52.227	0.088872	14.3237	6.40252	6.0283	5.61546	3.72978	0.02375	54.5646	0.10149	32.1227	326.477	20.4174	0.417613	0.608951	9.01272	7.10731	16.2857	23.2374	26.1172	15.4867	1.26401	17.5804	3.05002	0.16417	79.7565	0.0984893	17.5873	26.8829	7.68997
E168	0.787724	6.85275	14.2462	0	14.3155	3.73568	27.1669	27.7119	8.77771	1.23108	2.05779	1.74628	24.3124	146.208	20.1109	38.1655	0.860238	7.65849	0.881859	51.5775	1.99628	4.2674	14.6883	13.1265	3.8744	6.684	0	96.2488	1.91785	85.0224	255.412	4.7931	0.148899	4.35226	15.994	4.45011	25.6281	12.044	113.23	14.1229	1.61243	22.2376	4.3103	1.02435	75.1058	0.491625	23.0862	30.7746	2.33056
E169	0.88835	1.63285	15.0061	0.316611	5.53644	17.9898	6.92644	32.8904	4.59884	2.125	4.95925	10.065	24.4804	100.788	13.0321	28.1056	34.6772	10.7794	1.18394	43.6727	2.12175	26.1057	13.1646	5.79705	6.14012	11.4441	0	93.3934	1.00199	42.3375	65.7623	38.2543	0.37482	22.4682	23.2956	5.4455	17.68	45.5239	63.9384	27.443	1.48239	41.2585	3.73096	0.825147	66.3025	2.18635	18.2422	54.2278	5.38354
E176	0.453031	1.42507	16.1241	0.356915	6.27816	9.64832	0.575718	23.8259	1.52558	1.19776	3.11438	8.01988	25.757	63.6605	13.5108	32.8569	5.00571	6.75092	0.148295	44.1021	2.88141	17.4868	15.2069	9.29424	4.99692	7.20812	0.0897115	118.93	0.931018	59.7711	282.268	27.2603	0.28169	18.1926	21.3908	0.444326	16.623	28.0432	60.328	21.0931	2.01593	18.7012	3.79581	1.55031	47.8354	0.372026	27.1059	55.9365	3.0085
E177	0.862485	2.6435	9.20644	0.562764	9.96757	16.0309	2.30278	16.5118	4.77083	2.31441	4.58147	8.495	46.0727	92.1195	11.32	37.8372	23.6719	6.44448	0	38.2415	2.10168	41.8754	12.7449	7.19263	6.98742	11.9656	0.0624054	144.73	0.800022	72.6735	94.1343	15.1385	0.15676	16.3887	17.964	9.79306	20.2162	33.3578	68.3169	24.9112	0.590454	37.5215	3.37022	1.72549	97.5574	4.65822	24.3051	35.3473	4.32989
E178	0.849937	0.273109	6.89472	0.273605	2.12327	5.26452	1.29642	16.6228	0.620965	1.83636	3.93339	7.28317	8.4621	39.9282	12.4748	19.6209	19.1779	5.75635	0.426302	21.9539	1.86572	23.8209	12.5703	6.47912	7.65135	6.02796	0	69.3382	0.897376	65.6767	103.173	40.5654	0.259127	6.8328	17.9359	6.69573	23.0153	24.2652	55.1899	26.087	1.64705	18.7928	3.33385	0.891334	52.7129	3.03014	22.0702	29.7116	5.84519
E179	0.523271	14.5512	14.7724	1.08789	9.61305	27.5633	0.811598	14.7692	2.08633	1.8254	5.48554	18.292	10.0939	189.11	17.3451	42.7694	40.1691	14.7775	0.135602	40.4073	4.68123	57.0517	13.6261	5.5773	18.7199	17.1146	0.184574	190.123	1.05164	67.5069	519.982	85.4993	0.206064	38.9595	25.9517	8.59636	18.7676	105.585	61.1193	37.9754	1.94041	32.8129	4.76162	4.81991	98.1414	2.12615	26.3619	70.5812	7.11465
E190	0.329907	0.0755462	0.0889362	0	1.3861	3.13729	5.28762	18.9886	0.0257653	2.03187	3.72693	5.47866	3.51113	0.324846	14.9052	26.4259	0.8782	7.78971	0.353766	8.31649	0.720745	14.8839	7.2845	6.48528	9.04979	7.11263	0.0214012	34.8164	0.58791	66.0502	117.479	86.5259	0.268795	0.848033	23.4686	4.463	16.5634	4.28151	44.9795	36.0506	0.556845	44.813	2.09314	3.84629	54.9822	1.80456	20.7818	32.4888	18.5115
E201	0.176122	9.55161	40.1591	0	9.2141	23.6044	16.892	18.6756	6.54846	3.11292	9.36514	12.5658	63.418	118.395	16.7771	41.4013	4.14514	11.4052	1.64307	30.2147	2.96179	131.566	5.11253	3.14654	37.7258	19.4114	0.165663	66.1772	0.707922	59.4048	1.81081	9.68249	0.554853	14.03	78.4038	2.7638	16.7055	41.7734	16.7847	14.5417	4.50639	49.1469	2.63	10.3062	48.777	2.67164	17.7457	35.6089	18.1354
E207	0.388605	7.39001	12.3363	0.564072	29.1826	31.5042	25.9455	8.46173	5.00077	2.36619	11.4981	21.0645	76.3249	423.438	42.8639	85.3364	19.955	31.3305	2.19719	24.0124	9.11868	96.2335	3.61944	2.75413	44.4972	30.4617	0.265839	122.151	2.19086	90.6991	516.942	102.955	0.667778	42.859	58.7836	7.55345	11.3931	266.126	42.4543	27.7798	2.59386	87.0012	2.09134	19.7542	130.653	6.33888	8.58937	121.375	34.7377
E63	0.469137	0	14.8997	0.117041	5.93409	2.98507	4.66081	34.1274	6.19256	0.736453	3.54728	3.08193	31.6739	32.0254	11.7969	26.2461	22.773	4.4957	0.0911806	27.1703	0.447216	16.8584	9.53783	10.715	5.07887	6.49688	0	61.8225	0.218876	44.0721	12.2999	28.4049	0.13856	6.92152	21.2506	1.15031	24.3353	11.6388	60.6577	14.8714	1.79403	22.7986	5.18381	2.28774	56.4473	0.533735	20.9052	62.9421	2.2963
E74	0.337817	3.27532	8.73287	0.0269694	8.6786	12.6771	1.95762	24.2743	2.90741	1.35758	5.32385	10.5878	4.17056	117.107	10.2091	26.0375	0.330751	12.1486	0.756374	40.5379	2.75857	21.3395	12.8751	8.0325	6.47279	10.5142	0.152523	101.81	0.915584	58.5427	339.105	6.18822	0.255422	22.1014	23.5848	4.3735	14.2911	30.2754	97.6514	21.9951	1.53331	21.4528	5.66434	0.351436	55.0398	0.35139	33.8307	40.1761	3.52752
E78	0.178649	0.533866	2.8864	0	2.61943	1.74969	10.9996	39.4472	0.263	0.89742	1.72139	5.73575	16.5415	29.3327	7.30056	24.1629	1.34548	3.11269	0.22222	28.8284	0.712646	8.49116	23.6111	13.7533	3.17089	5.18588	0	41.1108	0.205166	48.2643	22.7028	12.1862	0	1.67121	11.7839	4.52058	21.9441	9.77027	89.1557	12.5027	0.874463	23.9581	4.71619	0.464629	72.4958	0.27874	19.6047	26.1728	5.28551
E81	0.421702	0.326716	0.695987	0	0.87087	1.59409	0.791947	43.2434	0.206937	1.17687	2.55841	3.38482	8.67695	10.1351	9.5344	25.9464	0.714601	2.37569	0	21.0335	0.428797	7.47138	24.8427	15.9584	3.96789	3.69412	0	37.9302	0.581154	46.722	19.5977	18.6369	0.265706	0.88349	12.706	1.04778	23.1996	5.45571	109.882	15.0327	0.750608	18.8129	7.10686	0	49.8496	0.950398	33.1606	33.2069	4.77041
E83	0.418066	0	5.48028	0.0758545	2.82555	3.59171	2.72752	23.5167	1.53506	1.76776	1.98025	1.50108	19.5503	48.5656	15.9227	29.0176	12.4514	2.18525	0	48.7231	1.04045	32.0494	6.55463	8.27151	4.30755	3.98214	0	78.2845	0.232785	50.3226	1.71935	11.1165	0.119734	1.24067	6.70573	7.75334	18.205	8.26945	82.9828	13.8471	1.71941	12.7336	2.75662	1.1532	76.1835	2.07548	15.9004	19.6313	1.43312
E85	0.0157518	0.104604	0.492577	0.0314382	0.715648	1.70512	0.412028	35.8423	0	0.615431	4.01368	3.61236	0	7.30914	6.61397	37.3198	0.444873	5.68112	0	13.749	0	13.605	27.5156	19.955	2.8295	3.59845	0	69.7361	0.922579	35.8497	10.6889	6.25517	0.297746	1.61167	11.1596	0.957843	33.6917	12.6903	106.07	24.0295	0.665887	18.1369	7.81263	0.204835	62.3246	0.737309	32.3979	40.3099	5.89392
E86	0.550304	0.294714	7.91045	0.0708599	4.76576	7.36622	0.428624	25.7772	0.422155	1.38714	3.99114	7.80278	0	62.9827	12.4894	19.1996	10.2277	7.82522	0.220812	23.9583	2.24936	36.8341	10.5486	6.83309	6.90899	9.42182	0	65.7339	1.03972	56.9109	215.077	48.8909	0.0838876	11.2092	18.5998	5.78033	24.6676	26.2022	48.4836	15.2153	1.06641	20.9207	3.57864	0.230843	55.7587	1.66185	24.2632	41.7521	6.64227
E87	0.552466	2.05022	10.8824	0.0648614	11.3421	11.852	2.38673	19.4599	3.10975	1.72319	4.34914	8.01175	75.2266	121.798	14.1247	37.2937	0.061189	9.25784	0	37.1064	4.53731	20.9272	20.2269	14.2511	9.10396	10.8291	0.0611365	94.1452	1.30626	42.3025	99.638	4.42318	0.153573	14.5354	28.2726	6.47033	18.1868	33.5395	127.586	25.6824	1.98842	27.8221	5.25152	0.845205	62.8104	1.64793	23.8109	33.6753	6.50417
E88	0.131843	0.437769	1.80376	0.0219283	1.81515	6.59794	0.353711	31.4146	0	1.22647	1.50564	5.08125	23.737	18.667	8.16193	32.5956	0.930901	2.7183	0	11.0674	0.747647	9.71414	17.8414	7.97646	8.29376	4.83114	0	72.2558	0.479472	39.8285	32.9399	5.66486	0.363437	7.21058	11.1539	5.6465	21.8848	18.4784	86.0894	24.277	0.513348	12.9185	3.14655	3.00033	55.8841	0.199996	35.4487	21.6512	4.11103
E91	0.245552	1.4161	1.07771	0	0.42703	2.19842	0.494081	27.0858	0.0585412	0.216403	1.85409	6.91558	19.944	42.8087	5.57174	35.4685	0.121668	3.35514	0	28.9758	0.879452	4.09511	23.3039	15.9316	2.90189	6.26	0.0486255	93.1461	0.35621	33.0955	1.43507	18.5834	0.0610726	0.547819	15.9969	0.0507018	21.8202	9.27199	99.9145	23.1707	1.78279	27.1005	4.50768	2.01672	35.2906	0.268861	31.7618	25.4012	4.38593
E95	0.425711	2.35588	5.40821	0.283219	6.70352	7.22334	1.1778	22.7035	2.31001	0.792038	2.12695	13.1527	5.47465	75.2166	9.14181	26.5382	2.60504	5.62484	0.220641	43.846	1.20705	23.7514	15.9923	17.1127	7.20708	14.1675	0	91.3759	0.631495	41.5899	105.704	9.82739	0	23.3602	20.1743	1.60053	24.2278	50.4861	251.218	17.0168	1.30237	34.1199	4.62592	0	83.9325	0.968659	37.6487	29.9659	3.55008
E98	0.162601	0.209961	2.3305	0	0.858137	0.931297	0.872461	30.1564	0.0613781	1.05882	2.01164	1.96805	0	34.3073	10.2373	13.2849	0.663333	1.88872	0	18.7735	1.84414	10.8493	5.46045	3.34513	0.985196	3.52218	0	35.8772	0.59133	30.3212	89.6083	13.0472	0.298817	0.699803	9.95537	3.75656	20.0928	2.54985	18.2258	9.16334	1.5677	7.61127	1.99451	0.11747	38.4423	0.587271	24.397	30.8799	2.75122
E99	0.416209	1.58671	29.7667	0.153832	9.83682	20.3818	2.97765	20.4228	0.296762	0.8604	5.44626	6.83465	52.3352	100.141	10.1094	34.4517	12.3354	10.3674	1.05461	40.3657	1.37453	14.9687	9.87084	6.38434	9.32903	10.6706	0	88.0534	0.902865	65.5736	137.318	34.5075	0.218538	30.9363	28.077	4.23331	17.7653	43.4217	52.7081	27.3949	1.30332	23.7633	4.26679	0.200458	62.0081	5.41165	21.7786	66.9002	4.02417
E101	0.0874948	0.338936	1.17803	0	1.80688	2.10473	0.352101	44.4242	0	0.895316	1.31144	4.79336	0	1.97792	6.32779	24.0462	2.2789	3.88738	0.18139	16.0086	0.479053	13.1168	18.4512	17.9763	4.77117	7.43914	0	69.4994	0.77036	35.5762	10.4352	29.2344	0.137822	1.36414	12.0333	0.972554	14.5926	9.00417	79.9605	17.4296	0.778682	23.8229	3.40636	1.13778	53.1178	1.36515	32.2928	52.8184	6.85223
E104	0.215713	0.179063	0.08432	0	0.579118	0.555972	0.716166	17.5993	0.0732839	2.58861	2.07852	2.72082	9.98665	0.538974	13.3288	17.1108	1.48247	1.29667	0.134162	19.7516	0.0759261	11.3552	12.2105	8.82885	5.25875	3.16794	0.0202903	22.8041	0.32205	34.3661	44.313	26.1475	0.0509686	0.930137	7.96334	2.32724	16.2152	2.53705	44.9513	13.7396	0.863905	15.3701	2.2606	0.280512	36.61	1.93528	16.3011	52.0198	4.31728
E114	0.376819	2.37725	1.27656	0	3.46291	4.37042	0.417013	47.3845	0.10668	0.736128	1.7751	2.44846	17.4453	28.1108	12.1709	34.2101	6.24355	4.33323	0.468722	23.9542	2.03369	12.9993	28.3757	14.9637	5.60041	7.50803	0	99.4789	0.735676	43.6826	19.0616	10.9212	0.445174	1.84513	13.8085	4.13928	18.2285	16.2871	105.282	19.2602	0.4192	28.2276	4.43126	0.245007	63.7616	0.930904	25.2567	34.2027	6.06613
E115	0.139928	1.04538	2.68924	0	3.86496	2.88517	4.82157	43.8583	0.574412	0.976261	2.80893	2.94155	26.9921	10.7383	7.68812	21.3076	2.2065	3.90084	0.108784	21.3825	0.246257	14.839	25.8049	19.4311	4.07701	5.04729	0.0329046	40.6589	0.502179	32.7628	22.6592	19.6612	0.16531	0.715848	15.0031	3.22511	23.2268	6.89146	109.325	15.1293	0.466995	23.5514	6.35252	2.72942	58.2182	0.500327	21.0334	36.3699	3.50065
E128	0.492577	0.590615	10.5899	0	2.88217	3.06809	8.28691	24.0676	1.79739	1.06918	3.45717	2.87637	21.1152	22.1729	13.0276	18.4112	20.5585	3.74288	0.085099	18.6673	1.09163	27.2023	9.46241	6.60019	5.73496	5.33498	0	52.9041	0.487122	51.1245	43.5545	18.141	0.581931	3.35993	15.6363	5.23371	20.8952	7.80489	53.1135	18.1833	1.15684	26.1711	4.44401	0.533788	61.1393	1.77906	17.6227	40.115	3.57191
E129	0.138199	1.42761	0.560213	0	2.44175	3.08698	0.896012	30.343	1.02595	0.771359	0.887753	2.6411	0	13.3735	8.17266	22.1557	1.56125	3.02326	0.191005	16.8196	0.0720636	13.7336	12.5857	10.1005	5.41811	6.54107	0	36.771	0.440866	37.7636	32.0177	7.37635	0	2.04245	4.41823	0.993983	19.2986	4.69557	73.7052	19.6817	0.990781	20.9255	4.37309	0.798724	59.2006	1.27779	27.7484	24.2186	2.40515
E130	0.154525	1.14689	3.9084	0.0181418	0.938575	1.00739	0.841324	35.107	1.00876	1.52204	1.94634	4.03013	2.80546	11.8099	10.9139	19.4517	4.58672	4.68789	0	9.2675	1.5357	25.6433	22.6299	11.0281	6.72557	4.23112	0	35.7825	0.605457	48.2212	43.7378	19.7365	0.257726	1.9265	9.59801	3.29857	29.3142	4.1159	79.4429	20.4423	1.173	22.5083	4.18842	1.65483	59.4968	1.5837	29.3873	25.316	5.06219
E139	0.398387	0	17.0001	0.563213	19.2311	34.1409	1.0688	18.5129	3.13922	1.01915	10.0233	16.496	56.356	353.011	23.0077	28.1026	0.500069	24.5548	0.10324	44.5222	8.72502	30.7105	12.67	7.52188	20.695	20.8994	0.0936826	190.994	0.876913	52.6732	234.499	12.5457	0.235327	29.5765	36.2269	8.33561	23.1451	149.156	65.1689	31.9796	1.29265	37.6863	5.25855	3.45374	76.443	2.37413	56.6116	74.131	11.8445
E141	0.26597	0.557763	10.506	0.0838166	3.58467	8.47861	3.01382	49.3508	0.428011	0.703193	4.37622	8.18618	4.32048	70.8516	7.25384	27.4598	0.289927	4.21949	0.0870627	48.2585	2.82489	11.5183	33.6317	20.3257	2.33494	5.77066	0	130.815	1.18964	34.6556	35.5786	3.13809	0.463057	9.10518	20.8989	0	20.4479	18.2749	129.893	22.6757	0.840932	28.0266	7.48053	1.09221	37.5159	1.56529	35.2308	31.1609	1.46173
E147	0.440998	1.52286	4.50491	0	1.63929	1.4094	0.496911	56.115	0.019976	1.77224	2.644	4.31506	10.8888	9.44456	8.99219	20.9579	21.9208	7.3149	0	20.1845	0.206962	25.5133	35.061	31.4577	6.48824	5.69626	0	43.2718	0.506455	65.7371	27.205	45.5888	0.333437	1.57281	16.2322	0.899649	27.6076	7.46882	140.926	17.2001	1.09894	31.9719	6.26551	0.917554	68.8124	1.33028	36.977	39.0235	9.2099
E149	0.292409	1.68632	11.1893	0.184297	11.7277	7.65547	7.80354	17.7399	2.17851	1.54619	4.94305	6.99994	52.2495	105.69	13.2267	28.9419	6.43289	10.1091	0.382868	26.9041	2.45567	55.7656	12.3775	6.07395	11.2884	13.6138	0	75.8645	0.706971	78.2168	126.27	12.0258	0	7.98572	19.0077	8.96596	27.8086	41.6311	63.1748	35.7003	1.30118	68.2962	2.73317	3.60234	116.484	3.64188	28.4176	66.2065	12.1867
E167	0.255621	0	2.58616	0	1.3663	2.32528	0.272297	67.4167	0	1.76246	3.0909	2.81613	9.28175	3.43495	6.96824	36.8789	3.42569	5.52795	1.12223	22.6834	1.34077	12.9872	40.7473	27.3278	2.05792	4.33902	0	60.0707	0.500783	53.9671	16.8822	13.3869	0	1.09892	13.4692	6.01701	22.606	4.50962	113.277	13.2428	0.501829	22.2426	6.92861	3.51961	37.2508	0.430118	34.2863	32.356	3.66363
E173	0.0411499	0	3.91404	0.0205323	3.01679	3.02268	1.67667	52.3615	0.629093	0.803877	1.74021	3.22429	3.17513	36.3528	6.39993	23.635	0.639204	3.38771	0.0639826	8.85375	0.506935	12.0926	37.8381	22.8572	2.77193	5.38945	0	87.8448	0.543465	27.793	26.1468	14.0019	0.145844	7.38312	19.5753	0.484311	23.0775	14.0352	141.227	13.3477	0.434891	12.1797	7.07757	1.60533	48.9389	1.12359	31.6373	27.427	2.68558
E192	0.306562	0.0442567	1.07675	0	2.09195	4.60333	1.63597	21.35	0.0905635	1.04153	3.51044	5.90961	12.3414	4.94786	12.5783	17.9659	11.8956	8.0585	0.663182	14.339	0.719353	22.5477	14.5434	5.84496	10.8027	5.05962	0.0250746	33.4748	0.826587	55.4763	68.4109	19.8487	0.0629864	3.74059	19.7182	8.62795	20.9236	2.90011	57.905	27.9843	0.800704	43.9828	3.98785	1.38661	51.9949	1.07448	23.9985	47.1964	6.72706
E193	0.0628662	0.0521851	6.4711	0.062736	4.67378	1.45827	1.96066	20.1163	2.04676	1.92989	3.8701	5.58664	9.70153	46.6739	17.3919	22.4219	6.09594	2.13593	0	27.1292	0.44255	20.6431	8.45362	5.43707	2.65513	5.26414	0.0886997	69.0295	0.631728	37.5709	174.519	12.6334	0	1.37834	14.121	1.23316	34.3618	15.8968	150.475	15.9426	0.524525	16.5635	5.12973	0.408755	69.9884	1.55306	24.0634	21.371	4.10285
E195	0	3.47203	9.29277	0.321078	5.20482	9.32913	0	15.2524	0.0303628	0.74826	6.31523	3.48433	0	62.9723	20.6711	41.7286	0.555314	18.1725	0.500269	14.6843	0.88081	36.4498	7.69155	4.57243	21.7879	23.994	0	96.7782	0.954544	83.6748	83.032	31.7702	0.253406	19.9479	17.6127	6.10086	13.4789	62.5955	22.3738	17.7102	1.37207	22.6637	2.27359	5.92726	73.8939	3.76506	17.4425	49.2281	28.2307
E198	0	0	0	0	3.25088	2.68001	1.7726	26.0518	0	1.69277	4.17472	8.33517	0	0.103098	12.1686	18.1285	0.326305	10.4426	0.718571	5.19062	0.474438	25.907	8.65583	10.7663	4.75609	4.19227	0.108675	33.7401	0.696596	81.4389	92.4775	17.2514	0.272988	2.36425	22.8939	6.48733	18.1506	4.24639	68.3808	32.025	1.1889	41.9829	3.07316	1.87803	74.4094	0	30.5581	50.1165	14.9548
E202	0.0267913	0	5.72495	0	6.39034	14.9841	0.377352	15.1403	0	1.27106	4.56066	8.08968	12.4033	45.8061	12.2464	45.4813	18.2355	17.2715	0.0833137	17.2931	1.82312	62.2316	11.8715	14.6857	25.8961	16.7276	0.176403	60.0875	1.01534	74.4858	307.08	24.4098	0.379815	15.8598	18.3263	10.3792	13.8496	70.5821	89.7064	27.8087	0.238436	29.7957	4.35078	8.36143	71.3257	1.91591	23.1507	37.9096	24.7119
E206	0.150937	1.00234	10.3053	0.150625	4.48856	2.80096	2.61186	51.7435	1.50415	0.758213	2.23004	4.21143	18.6341	44.8243	10.0894	26.2525	0.937835	4.10257	0	10.6652	1.09795	12.8824	22.0362	15.0765	3.32457	6.09255	0	90.9778	0.485354	20.5618	31.2858	10.0059	0	3.39755	18.1502	5.80305	34.7181	19.5273	122.76	26.4676	1.04106	18.1153	5.07134	0	50.2391	0.117751	33.3257	26.8011	6.43576
E210	0.227071	0.0538545	11.7078	0	0.435436	1.04508	0.5548	18.4531	0.771426	0.814757	2.88256	1.17787	10.0119	27.2098	11.5251	34.7464	1.16047	6.04758	0	22.7229	0.875356	4.72489	21.187	24.1036	3.22566	4.12316	0	82.9844	0.223521	52.1574	6.20349	8.05107	0.229938	0.592683	5.10707	2.54523	16.8459	10.9687	60.3211	9.18288	2.52609	17.6646	5.65713	0.421831	72.3917	0.084355	18.7581	23.2861	5.92774
E213	0.25879	0.0537052	7.96624	0	3.67425	6.46155	0.520717	34.5037	0.0366327	0.722221	2.56287	9.02591	0	54.846	18.489	22.0262	1.55315	5.41083	0	28.9872	2.01153	26.8655	14.1684	7.7233	3.63178	7.39	0.121711	92.3902	0.557254	41.3137	134.502	27.2978	0	12.8847	14.2689	2.12572	21.6319	28.059	40.3031	30.5248	1.97928	11.9191	2.71721	1.68265	52.1152	0.420606	24.7644	28.3851	2.95566
E215	0.0129267	3.21912	0.77478	0	3.36361	7.56293	0.494191	35.0259	1.05398	0.0721505	2.29737	5.73133	15.9588	17.3488	6.20834	28.2315	0.462441	8.5136	0.482381	21.871	1.60763	43.6688	20.263	31.3665	5.114	13.4331	0.0243181	45.9039	0.786805	73.6136	5.4226	26.3703	0.427604	2.92865	22.6322	0.760697	19.0662	38.3885	147.471	21.8544	0.690265	45.7729	4.44664	5.54723	62.8037	0.504227	41.7923	58.7326	9.33624
E216	0.0415537	0	1.19115	0	0.085814	2.39189	0.250834	32.0362	0.0313712	1.15967	1.95749	2.48827	8.55011	1.38433	5.32969	29.3846	0.339038	1.76176	0.0861472	34.5772	0.260018	8.49481	13.4815	11.8782	3.25824	5.21037	0	59.7042	1.00215	44.3608	18.7985	9.53709	0	0.951559	13.5354	1.277	20.9555	1.79199	51.192	17.5359	0.708818	16.0612	4.45443	1.26085	26.2446	0.108058	19.205	33.9166	1.08477
E223	0.112746	2.48013	5.06819	0.112512	9.51713	7.37367	3.26109	24.4733	3.20788	0.629293	3.34965	5.49441	39.1477	48.1914	13.4184	21.6401	2.38819	5.86871	0.0876522	28.6343	2.21569	15.8459	14.5112	8.30892	5.0933	7.93998	0	85.935	1.16533	54.2275	267.603	18.9561	0.133198	6.90087	20.084	5.88835	19.1159	28.0952	68.1053	13.8527	0.909339	25.2382	3.99108	1.28287	61.1886	1.64919	29.4497	23.9059	3.92435
E229	0.332857	0	8.35863	0	3.62445	5.65433	1.00462	49.0362	2.05603	1.52006	3.40166	5.08896	9.33939	62.7531	11.4521	29.434	3.3615	5.21958	0	28.3361	1.66862	13.5318	18.6788	13.2696	3.30018	7.66642	0	68.0433	0.538644	39.4385	50.2145	22.5308	0.285991	6.14794	14.9081	3.8285	19.8762	22.1543	98.4713	18.3219	0.841576	18.6096	4.091	0.983741	58.791	1.10164	22.3698	39.6061	2.23816
E234	0.363756	1.48963	1.76946	0.121001	4.80771	10.8129	2.8057	19.3313	0.906243	1.89496	3.73868	6.99804	18.7116	45.7898	12.4131	22.6058	6.68917	15.5912	0.527885	14.8822	1.30879	35.0743	14.5966	9.15735	11.357	9.18465	0	49.2898	0.570923	79.3334	228.887	27.1816	0	8.59567	24.1582	8.37211	25.9348	24.8137	79.3384	38.6151	1.13307	56.8961	4.11274	1.89211	84.8939	2.74319	32.1895	42.4115	16.6707
E241	0.0936081	0.372979	2.29301	0.186828	0.773253	2.55739	0.753404	22.5613	0.89044	1.67192	1.08237	3.43475	11.5565	12.0285	10.8844	27.4028	3.87751	1.5005	0	5.76753	2.1526	38.7509	13.2348	6.56788	6.0854	6.91381	0	53.3609	0.408509	35.9263	19.6338	18.6463	0.530825	2.13446	7.62282	1.61585	15.9821	8.3672	63.4044	14.5745	0.874744	22.1652	2.63593	1.94764	67.531	0.486846	34.3235	18.3822	6.67936
Correlation coefficients between the gene marix and IHC scores
Genes	LINC01515	LINC01597	ARHGEF38	ABCC12	SPATA6L	CFAP70	CYP3A5	ACAT2	PKHD1	TOB1_AS1	ZNF19	ZNF487	MIR6772	DNAJB13	LINC00963	RRP12	SHANK1	MORN1	ZNF311	SIAE	LINC00240	PYROXD2	FBXO5	WDR76	COLQ	LRRC27	DLG5	DPCD	ZBED3_AS1	LETMD1	RRAD	KCNK6	LINC01277	DNAH6	IFT74	BEND7	HUS1	FANK1	TMPO	MORN4	MKLN1_AS	ZNF248	ZNF765	ATOH7	ZFYVE27	EBF3	HSPB11	URB1	GUCA1B
Correlation coefficients	0.545176	0.527403	0.521193	0.517724	0.504546	0.502463	0.49777	0.49319	0.491806	0.477244	0.474344	0.473806	0.469845	0.466571	0.466338	0.465354	0.462947	0.461796	0.456146	0.453535	0.451797	0.451295	0.449285	0.448781	0.447282	0.446788	0.44484	0.443057	0.441899	0.441391	0.439382	0.438354	0.438084	0.43611	0.435164	0.432857	0.432813	0.432137	0.431035	0.429834	0.42934	0.427762	0.426385	0.424097	0.423289	0.423277	0.422285	0.421619	0.421607
[truncated: 954 more columns]
