# Supplementary material for: Impairment of FBXO31-mediated Ubiquitination of OGT Upregulates O-GlcNAcylation to Advance Endometrial Malignancy
Source: Research Square preprint supplement (doi:10.21203/rs.3.rs-4019799/v1), 2024-04-12
Supplement: Supplementary file 6 [file 87368dbf974f852fafabcdd0.xlsx]

## Sheet: Sheet1
Supplementary table 2. GO analysis for 1000 O-GlcNAc correlated genes
	ONTOLOGY	ID	Description	GeneRatio	BgRatio	pvalue	p.adjust	qvalue	geneID	Count
GO:0060271	BP	GO:0060271	cilium assembly	82/768	367/18614	2.12021e-37	5.0867e-34	5.0379e-34	CFAP70/PKHD1/DNAJB13/IFT74/IFT46/AHI1/TEKT3/IFT27/CFAP54/CFAP69/CFAP43/DRC7/CCDC40/MKS1/FUZ/CBY1/RPGRIP1L/ARMC2/GAS8/IFT140/BBS5/TMEM17/STK36/IFT122/ALPK1/SPEF2/IFT88/ENKD1/IFT172/INTU/SPAG17/CFAP74/CEP89/CCDC65/CEP290/IFT43/BBS1/NME8/DNAAF3/CCDC57/DNAH7/DNAH1/CDK10/CFAP46/CEP164/ARMC12/TEKT4/DNAAF1/DNAI1/TMEM231/CCDC13/B9D1/CCNO/TCTN1/RFX2/GBF1/KIF24/WDR19/CEP83/LRRC43/CFAP58/RPGRIP1/DNAI2/WDPCP…	82
GO:0044782	BP	GO:0044782	cilium organization	85/768	396/18614	2.40563e-37	5.0867e-34	5.0379e-34	CFAP70/PKHD1/DNAJB13/IFT74/IFT46/AHI1/TEKT3/IFT27/CFAP54/CFAP69/CFAP43/DRC7/ENO4/CCDC40/MKS1/FUZ/CBY1/RPGRIP1L/ARMC2/GAS8/TTC21A/IFT140/BBS5/TMEM17/STK36/IFT122/ALPK1/SPEF2/IFT88/ENKD1/IFT172/INTU/SPAG17/CFAP74/CEP89/CCDC65/CEP290/IFT43/BBS1/NME8/DNAAF3/CCDC57/DNAH7/DNAH1/CDK10/CFAP46/CEP164/ARMC12/TEKT4/DNAAF1/DNAI1/TMEM231/CCDC13/CATIP/B9D1/CCNO/TCTN1/RFX2/GBF1/KIF24/WDR19/CEP83/LRRC43/CFAP58/R…	85
GO:0007018	BP	GO:0007018	microtubule-based movement	68/768	417/18614	1.1309e-22	1.5942e-19	1.5789e-19	CFAP70/DPCD/DNAH6/IFT74/DNAH11/IFT46/TEKT3/IFT27/KIF12/CFAP54/CFAP69/CFAP43/DRC7/ENO4/KIFC3/CCDC40/FUZ/ARMC2/GAS8/TTC21A/IFT140/KATNB1/CCSAP/STK36/IFT122/SPEF2/CATSPER3/IFT88/IFT172/INTU/SPAG17/TTLL9/GAS2L2/CCDC65/IFT43/BBS1/NME8/DNAH7/DNAH1/CFAP46/ARMC12/TEKT4/PEX14/DNAAF1/DNAI1/CFAP53/KIF15/KIF24/WDR19/ARL8A/KIF9/KIF17/CFAP58/DNAI2/WDPCP/BBS2/HYDIN/TEKT2/CFAP221/IQCG/NPHP4/MEIG1/PGK2/FLOT2/ZMYN…	68
GO:0003341	BP	GO:0003341	cilium movement	44/768	193/18614	7.39722e-21	7.82071e-18	7.74567e-18	CFAP70/DPCD/DNAH11/TEKT3/CFAP54/CFAP69/CFAP43/DRC7/ENO4/CCDC40/ARMC2/GAS8/TTC21A/CCSAP/STK36/SPEF2/CATSPER3/SPAG17/TTLL9/GAS2L2/CCDC65/BBS1/NME8/DNAH7/DNAH1/CFAP46/ARMC12/TEKT4/DNAAF1/DNAI1/CFAP53/KIF9/CFAP58/DNAI2/BBS2/HYDIN/TEKT2/CFAP221/IQCG/NPHP4/MEIG1/PGK2/ZMYND10/SPEF1	44
GO:0044458	BP	GO:0044458	motile cilium assembly	26/768	64/18614	9.07276e-20	7.67374e-17	7.60011e-17	AHI1/CFAP54/CFAP69/CFAP43/DRC7/CCDC40/MKS1/ARMC2/BBS5/SPEF2/ENKD1/INTU/SPAG17/DNAAF3/DNAH1/ARMC12/DNAAF1/CFAP58/BBS2/E2F4/CFAP221/NOTO/IQCG/MEIG1/ZMYND10/CC2D2A	26
GO:0035082	BP	GO:0035082	axoneme assembly	30/768	94/18614	4.42973e-19	3.12222e-16	3.09226e-16	DNAJB13/CFAP69/CFAP43/DRC7/CCDC40/ARMC2/GAS8/STK36/SPEF2/SPAG17/CFAP74/CCDC65/DNAAF3/DNAH7/DNAH1/CFAP46/DNAAF1/DNAI1/LRRC43/CFAP58/DNAI2/BBS2/HYDIN/TEKT2/IQCG/MEIG1/ZMYND10/SPEF1/LRGUK/CC2D2A	30
GO:0001578	BP	GO:0001578	microtubule bundle formation	33/768	123/18614	2.91211e-18	1.75933e-15	1.74245e-15	DNAJB13/CFAP69/CFAP43/DRC7/CCDC40/ARMC2/GAS8/STK36/SPEF2/NCKAP5L/SPAG17/CFAP74/GAS2L2/CCDC65/DNAAF3/DNAH7/DNAH1/CFAP46/DNAAF1/DNAI1/LRRC43/CFAP58/DNAI2/BBS2/HYDIN/TEKT2/IQCG/MEIG1/AAAS/ZMYND10/SPEF1/LRGUK/CC2D2A	33
GO:0001539	BP	GO:0001539	cilium or flagellum-dependent cell motility	36/768	156/18614	1.77539e-17	8.34236e-15	8.26231e-15	DPCD/DNAH11/TEKT3/CFAP54/CFAP69/CFAP43/DRC7/ENO4/CCDC40/ARMC2/GAS8/TTC21A/CCSAP/SPEF2/CATSPER3/TTLL9/GAS2L2/CCDC65/BBS1/NME8/DNAH7/DNAH1/EFHC1/CFAP46/ARMC12/TEKT4/DNAI1/KIF9/CFAP58/BBS2/TEKT2/CFAP221/IQCG/NPHP4/MEIG1/PGK2	36
GO:0060285	BP	GO:0060285	cilium-dependent cell motility	36/768	156/18614	1.77539e-17	8.34236e-15	8.26231e-15	DPCD/DNAH11/TEKT3/CFAP54/CFAP69/CFAP43/DRC7/ENO4/CCDC40/ARMC2/GAS8/TTC21A/CCSAP/SPEF2/CATSPER3/TTLL9/GAS2L2/CCDC65/BBS1/NME8/DNAH7/DNAH1/EFHC1/CFAP46/ARMC12/TEKT4/DNAI1/KIF9/CFAP58/BBS2/TEKT2/CFAP221/IQCG/NPHP4/MEIG1/PGK2	36
GO:0060294	BP	GO:0060294	cilium movement involved in cell motility	33/768	146/18614	7.61403e-16	3.21997e-13	3.18907e-13	DPCD/DNAH11/TEKT3/CFAP54/CFAP69/CFAP43/DRC7/ENO4/CCDC40/ARMC2/GAS8/TTC21A/CCSAP/SPEF2/CATSPER3/TTLL9/GAS2L2/BBS1/NME8/DNAH1/CFAP46/ARMC12/TEKT4/DNAI1/KIF9/CFAP58/BBS2/TEKT2/CFAP221/IQCG/NPHP4/MEIG1/PGK2	33
GO:0030317	BP	GO:0030317	flagellated sperm motility	28/768	131/18614	5.26801e-13	1.85653e-10	1.83872e-10	DPCD/DNAH11/TEKT3/CFAP54/CFAP69/CFAP43/DRC7/ENO4/CCDC40/ARMC2/GAS8/TTC21A/SPEF2/CATSPER3/TTLL9/NME8/DNAH1/ARMC12/DNAI1/KIF9/CFAP58/BBS2/TEKT2/CFAP221/IQCG/NPHP4/MEIG1/PGK2	28
GO:0097722	BP	GO:0097722	sperm motility	28/768	131/18614	5.26801e-13	1.85653e-10	1.83872e-10	DPCD/DNAH11/TEKT3/CFAP54/CFAP69/CFAP43/DRC7/ENO4/CCDC40/ARMC2/GAS8/TTC21A/SPEF2/CATSPER3/TTLL9/NME8/DNAH1/ARMC12/DNAI1/KIF9/CFAP58/BBS2/TEKT2/CFAP221/IQCG/NPHP4/MEIG1/PGK2	28
GO:0099111	BP	GO:0099111	microtubule-based transport	33/768	212/18614	4.60983e-11	1.49961e-08	1.48522e-08	DPCD/IFT74/DNAH11/IFT46/IFT27/CFAP54/CFAP43/CCDC40/FUZ/GAS8/TTC21A/IFT140/STK36/IFT122/SPEF2/IFT88/IFT172/INTU/SPAG17/IFT43/DNAH1/PEX14/DNAAF1/DNAI1/CFAP53/WDR19/ARL8A/KIF17/WDPCP/CFAP221/FLOT2/SPG7/RABL2B	33
GO:0006858	BP	GO:0006858	extracellular transport	15/768	44/18614	1.12333e-10	3.39325e-08	3.36069e-08	DPCD/DNAH11/CFAP54/CFAP43/CCDC40/GAS8/STK36/SPEF2/SPAG17/DNAH1/DNAAF1/DNAI1/CFAP53/ARRDC1/CFAP221	15
GO:0007224	BP	GO:0007224	smoothened signaling pathway	26/768	146/18614	2.64696e-10	7.46266e-08	7.39105e-08	DLG5/BTRC/IFT27/MKS1/FUZ/RPGRIP1L/CDK20/GAS8/IFT140/HERC4/TMEM17/STK36/IFT122/PDCL/IFT172/INTU/TMEM231/B9D1/TCTN1/WDR19/FOXA1/TTC23/WDPCP/TXNDC15/DZIP1L/CC2D2A	26
GO:0061512	BP	GO:0061512	protein localization to cilium	18/768	70/18614	3.04037e-10	8.03607e-08	7.95896e-08	SPATA7/DNAH11/CDK20/GAS8/TTC21A/IFT140/IFT122/BBS1/TCTN1/WDR19/CFAP58/CROCC/NPHP4/GGA1/DZIP1L/ZMYND10/INVS/CC2D2A	18
GO:0003351	BP	GO:0003351	epithelial cilium movement involved in extracellular fluid movement	14/768	41/18614	4.60498e-10	1.14556e-07	1.13456e-07	DPCD/DNAH11/CFAP54/CFAP43/CCDC40/GAS8/STK36/SPEF2/SPAG17/DNAH1/DNAAF1/DNAI1/CFAP53/CFAP221	14
GO:1905515	BP	GO:1905515	non-motile cilium assembly	17/768	65/18614	7.10992e-10	1.67044e-07	1.65441e-07	IFT74/MKS1/FUZ/RPGRIP1L/IFT140/TMEM17/IFT122/IFT88/ENKD1/IFT172/INTU/CEP89/BBS1/CCDC13/RPGRIP1/BBS2/CC2D2A	17
GO:0120316	BP	GO:0120316	sperm flagellum assembly	13/768	38/18614	1.89029e-09	4.20739e-07	4.16702e-07	CFAP54/CFAP69/CFAP43/DRC7/ARMC2/SPEF2/DNAH1/ARMC12/CFAP58/BBS2/CFAP221/IQCG/MEIG1	13
GO:0042073	BP	GO:0042073	intraciliary transport	14/768	47/18614	3.54548e-09	7.49693e-07	7.42499e-07	IFT74/IFT46/IFT27/FUZ/TTC21A/IFT140/IFT122/IFT88/IFT172/INTU/IFT43/WDR19/WDPCP/RABL2B	14
GO:0008589	BP	GO:0008589	regulation of smoothened signaling pathway	18/768	87/18614	1.30421e-08	2.62643e-06	2.60122e-06	DLG5/BTRC/MKS1/FUZ/RPGRIP1L/CDK20/GAS8/IFT140/HERC4/STK36/IFT122/PDCL/IFT172/INTU/TCTN1/FOXA1/TTC23/TXNDC15	18
GO:0007288	BP	GO:0007288	sperm axoneme assembly	10/768	28/18614	9.00362e-08	1.73074e-05	1.71413e-05	CFAP69/CFAP43/DRC7/ARMC2/SPEF2/DNAH1/CFAP58/BBS2/IQCG/MEIG1	10
GO:0003356	BP	GO:0003356	regulation of cilium beat frequency	8/768	17/18614	1.41391e-07	2.59974e-05	2.5748e-05	DNAH11/CFAP43/CCDC40/CCSAP/GAS2L2/BBS1/DNAAF1/BBS2	8
GO:0003352	BP	GO:0003352	regulation of cilium movement	11/768	40/18614	4.24181e-07	7.47443e-05	7.40271e-05	DNAH11/CFAP69/CFAP43/CCDC40/CCSAP/GAS2L2/CCDC65/BBS1/DNAAF1/KIF9/BBS2	11
GO:0009855	BP	GO:0009855	determination of bilateral symmetry	20/768	139/18614	1.10845e-06	0.000187505	0.000185706	DPCD/IFT74/DNAH11/AHI1/WNT8B/CCDC40/MKS1/RPGRIP1L/GAS8/IFT140/BBS5/IFT172/DNAAF3/DNAAF1/DNAI1/CFAP53/FGF8/DNAI2/NOTO/CC2D2A	20
GO:0048515	BP	GO:0048515	spermatid differentiation	25/768	204/18614	1.16598e-06	0.000189651	0.000187831	REC8/CFAP54/CFAP69/CFAP43/DRC7/ARMC2/NPHP1/TTC21A/SPEF2/OCA2/CATSPER3/SPAG17/HMGB2/DNAH1/TARBP2/ADAD2/ARMC12/RFX2/CFAP58/BBS2/CFAP221/IQCG/MEIG1/SLC9A8/UBE2J1	25
GO:0009799	BP	GO:0009799	specification of symmetry	20/768	140/18614	1.24401e-06	0.000194849	0.000192979	DPCD/IFT74/DNAH11/AHI1/WNT8B/CCDC40/MKS1/RPGRIP1L/GAS8/IFT140/BBS5/IFT172/DNAAF3/DNAAF1/DNAI1/CFAP53/FGF8/DNAI2/NOTO/CC2D2A	20
GO:0007368	BP	GO:0007368	determination of left/right symmetry	19/768	129/18614	1.42828e-06	0.000215722	0.000213652	DPCD/IFT74/DNAH11/AHI1/CCDC40/MKS1/RPGRIP1L/GAS8/IFT140/BBS5/IFT172/DNAAF3/DNAAF1/DNAI1/CFAP53/FGF8/DNAI2/NOTO/CC2D2A	19
GO:0007286	BP	GO:0007286	spermatid development	24/768	197/18614	2.11186e-06	0.000307968	0.000305012	REC8/CFAP54/CFAP69/CFAP43/DRC7/ARMC2/TTC21A/SPEF2/OCA2/CATSPER3/SPAG17/HMGB2/DNAH1/TARBP2/ADAD2/ARMC12/RFX2/CFAP58/BBS2/CFAP221/IQCG/MEIG1/SLC9A8/UBE2J1	24
GO:0060972	BP	GO:0060972	left/right pattern formation	19/768	134/18614	2.56048e-06	0.000360942	0.000357478	DPCD/IFT74/DNAH11/AHI1/CCDC40/MKS1/RPGRIP1L/GAS8/IFT140/BBS5/IFT172/DNAAF3/DNAAF1/DNAI1/CFAP53/FGF8/DNAI2/NOTO/CC2D2A	19
GO:0070286	BP	GO:0070286	axonemal dynein complex assembly	10/768	40/18614	3.70921e-06	0.000506009	0.000501153	CCDC40/CCDC65/DNAAF3/DNAH7/DNAH1/DNAAF1/DNAI1/DNAI2/TEKT2/ZMYND10	10
GO:0060632	BP	GO:0060632	regulation of microtubule-based movement	11/768	55/18614	1.2478e-05	0.00164904	0.00163322	DNAH11/CFAP69/CFAP43/CCDC40/CCSAP/GAS2L2/CCDC65/BBS1/DNAAF1/KIF9/BBS2	11
GO:0045880	BP	GO:0045880	positive regulation of smoothened signaling pathway	9/768	38/18614	1.83484e-05	0.00235138	0.00232882	DLG5/GAS8/STK36/PDCL/IFT172/INTU/FOXA1/TTC23/TXNDC15	9
GO:0042461	BP	GO:0042461	photoreceptor cell development	10/768	48/18614	2.12279e-05	0.00264037	0.00261504	AHI1/RPGRIP1L/IFT140/CEP290/BBS1/MFSD2A/RPGRIP1/NPHP4/CABP4/USH1C	10
GO:0031503	BP	GO:0031503	protein-containing complex localization	21/768	183/18614	2.26969e-05	0.00270029	0.00267438	IFT74/IFT46/IFT27/NUMB/FUZ/TTC21A/IFT140/IFT122/IFT88/IFT172/LMNB1/INTU/SPAG17/IFT43/WDR19/KIF17/DRD4/WDPCP/NETO2/RALA/RABL2B	21
GO:0021532	BP	GO:0021532	neural tube patterning	9/768	39/18614	2.29866e-05	0.00270029	0.00267438	MKS1/RPGRIP1L/CDK20/IFT140/TCTN1/WDR19/FOXA1/FGF8/DZIP1L	9
GO:0010970	BP	GO:0010970	transport along microtubule	20/768	172/18614	2.91589e-05	0.00333278	0.0033008	IFT74/IFT46/IFT27/FUZ/TTC21A/IFT140/IFT122/IFT88/IFT172/INTU/SPAG17/IFT43/PEX14/WDR19/ARL8A/KIF17/WDPCP/FLOT2/SPG7/RABL2B	20
GO:0036159	BP	GO:0036159	inner dynein arm assembly	6/768	17/18614	4.05036e-05	0.00450762	0.00446437	CCDC40/DNAH7/DNAH1/DNAAF1/TEKT2/ZMYND10	6
GO:0021915	BP	GO:0021915	neural tube development	19/768	163/18614	4.42866e-05	0.00480226	0.00475618	MKS1/FUZ/CBY1/RPGRIP1L/CDK20/IFT140/IFT122/IFT172/INTU/TCTN1/WDR19/FOXA1/FGF8/WDPCP/MTHFR/FOXB1/DZIP1L/RALA/CC2D2A	19
GO:0007281	BP	GO:0007281	germ cell development	28/768	319/18614	0.000149267	0.0157813	0.0156299	FBXO5/REC8/CFAP54/CFAP69/CFAP43/DRC7/ARMC2/TTC21A/SPEF2/OCA2/CATSPER3/SPAG17/HMGB2/DNAH1/TARBP2/ADAD2/ARMC12/RFX2/INHBB/CFAP58/BBS2/CFAP221/IQCG/MEIG1/ASPM/SLC9A8/UBE2J1/WDR77	28
GO:0035721	BP	GO:0035721	intraciliary retrograde transport	5/768	14/18614	0.0001731	0.0178546	0.0176833	TTC21A/IFT140/IFT122/IFT43/WDR19	5
GO:0046530	BP	GO:0046530	photoreceptor cell differentiation	10/768	62/18614	0.000207278	0.020871	0.0206707	AHI1/RPGRIP1L/IFT140/CEP290/BBS1/MFSD2A/RPGRIP1/NPHP4/CABP4/USH1C	10
GO:0000724	BP	GO:0000724	double-strand break repair via homologous recombination	18/768	171/18614	0.000256626	0.0252389	0.0249967	HUS1/REC8/MCM6/MMS19/POLL/POLN/MCM5/MCM3/INIP/RAD21/FEN1/RPA2/SWSAP1/PPP4R2/GINS2/MMS22L/RAD51/RPA3	18
GO:0007059	BP	GO:0007059	chromosome segregation	34/768	435/18614	0.000288434	0.0272388	0.0269775	FBXO5/REC8/ANAPC11/TUBGCP2/CENPQ/MMS19/HAUS2/KATNB1/CCSAP/SAC3D1/RAD21/CHAMP1/NUSAP1/GTF2B/MYBL2/KIF15/STAG1/SKA2/FAM83D/ARL8A/AKAP8L/CCNE2/DIS3L2/CENPF/UBE2C/NCAPG2/ASPM/CHFR/SPC25/GPSM2/AAAS/ANKRD53/ANAPC5/NCAPH	34
GO:0000819	BP	GO:0000819	sister chromatid segregation	23/768	250/18614	0.000289843	0.0272388	0.0269775	FBXO5/REC8/ANAPC11/KATNB1/CCSAP/RAD21/CHAMP1/NUSAP1/GTF2B/MYBL2/KIF15/STAG1/AKAP8L/DIS3L2/CENPF/UBE2C/NCAPG2/CHFR/SPC25/AAAS/ANKRD53/ANAPC5/NCAPH	23
GO:0021591	BP	GO:0021591	ventricular system development	7/768	33/18614	0.000330658	0.0300604	0.0297719	DPCD/NUMB/RPGRIP1L/BBS1/AK8/CENPF/HYDIN	7
GO:0006261	BP	GO:0006261	DNA-templated DNA replication	17/768	160/18614	0.000337673	0.0300604	0.0297719	FBXO5/MCM6/PCNA/POLN/MCM5/PRIM1/MCM3/FEN1/BARD1/RRM1/ALYREF/CCNE2/GINS2/MMS22L/RAD51/POLA2/MCM10	17
GO:0000725	BP	GO:0000725	recombinational repair	18/768	175/18614	0.000341191	0.0300604	0.0297719	HUS1/REC8/MCM6/MMS19/POLL/POLN/MCM5/MCM3/INIP/RAD21/FEN1/RPA2/SWSAP1/PPP4R2/GINS2/MMS22L/RAD51/RPA3	18
GO:1902017	BP	GO:1902017	regulation of cilium assembly	10/768	66/18614	0.000350673	0.0302652	0.0299748	FUZ/IFT140/IFT88/INTU/CDK10/KIF24/WDPCP/NOTO/CROCC/ZMYND10	10
GO:0006302	BP	GO:0006302	double-strand break repair	26/768	303/18614	0.000360806	0.030517	0.0302242	HUS1/REC8/APTX/MCM6/MMS19/POLL/POLN/DCLRE1A/MCM5/MCM3/INIP/RAD21/HMGB2/RNF168/FEN1/SPIRE2/RPA2/DEK/HMCES/SWSAP1/PPP4R2/LIG4/GINS2/MMS22L/RAD51/RPA3	26
GO:0035720	BP	GO:0035720	intraciliary anterograde transport	5/768	17/18614	0.000482556	0.0392448	0.0388682	IFT74/IFT46/IFT27/IFT88/IFT172	5
GO:1990403	BP	GO:1990403	embryonic brain development	5/768	17/18614	0.000482556	0.0392448	0.0388682	MKS1/CDK20/IFT140/TRA2B/CC2D2A	5
GO:0060296	BP	GO:0060296	regulation of cilium beat frequency involved in ciliary motility	4/768	10/18614	0.000494694	0.0394728	0.0390941	CCSAP/GAS2L2/BBS1/BBS2	4
GO:0030705	BP	GO:0030705	cytoskeleton-dependent intracellular transport	20/768	212/18614	0.000511143	0.0400301	0.039646	IFT74/IFT46/IFT27/FUZ/TTC21A/IFT140/IFT122/IFT88/IFT172/INTU/SPAG17/IFT43/PEX14/WDR19/ARL8A/KIF17/WDPCP/FLOT2/SPG7/RABL2B	20
GO:0000070	BP	GO:0000070	mitotic sister chromatid segregation	19/768	199/18614	0.000602969	0.0463628	0.045918	FBXO5/ANAPC11/KATNB1/CCSAP/RAD21/CHAMP1/NUSAP1/MYBL2/KIF15/STAG1/AKAP8L/DIS3L2/CENPF/NCAPG2/SPC25/AAAS/ANKRD53/ANAPC5/NCAPH	19
GO:0006310	BP	GO:0006310	DNA recombination	27/768	332/18614	0.000647417	0.0488915	0.0484224	HUS1/REC8/MCM6/MMS19/STAT6/POLL/POLN/MCM5/MCM3/SUPV3L1/INIP/RAD21/HMGB2/RNF168/FEN1/BARD1/RPA2/HMCES/SWSAP1/PPP4R2/ALYREF/LIG4/GINS2/HMGB3/MMS22L/RAD51/RPA3	27
GO:0005930	CC	GO:0005930	axoneme	43/804	156/19518	6.17488e-24	1.58077e-21	1.43972e-21	CFAP70/DNAJB13/DNAH6/SPATA7/DNAH11/TEKT3/CFAP54/CFAP43/CCDC40/RPGRIP1L/GAS8/IFT140/BBS5/CCSAP/IFT172/SPAG8/SPAG17/CFAP74/CCDC65/BBS1/NME8/DNAH7/DNAH1/EFHC1/CFAP46/TEKT4/DNAAF1/DNAI1/CFAP53/AK8/KIF17/LRRC43/RPGRIP1/DNAI2/WDPCP/CENPF/HYDIN/TEKT2/CFAP221/FAM166B/CCDC96/DZIP1L/SPEF1	43
GO:0097014	CC	GO:0097014	ciliary plasm	43/804	156/19518	6.17488e-24	1.58077e-21	1.43972e-21	CFAP70/DNAJB13/DNAH6/SPATA7/DNAH11/TEKT3/CFAP54/CFAP43/CCDC40/RPGRIP1L/GAS8/IFT140/BBS5/CCSAP/IFT172/SPAG8/SPAG17/CFAP74/CCDC65/BBS1/NME8/DNAH7/DNAH1/EFHC1/CFAP46/TEKT4/DNAAF1/DNAI1/CFAP53/AK8/KIF17/LRRC43/RPGRIP1/DNAI2/WDPCP/CENPF/HYDIN/TEKT2/CFAP221/FAM166B/CCDC96/DZIP1L/SPEF1	43
GO:0031514	CC	GO:0031514	motile cilium	48/804	248/19518	1.82095e-19	3.10775e-17	2.83045e-17	SPATA6L/CFAP70/DNAJB13/IFT74/DNAH11/IFT46/TEKT3/IFT27/CFAP69/CFAP43/DRC7/ENO4/NPHP1/GAS8/TSGA10/SPEF2/CATSPER3/IFT88/IFT172/INTU/SPAG17/IQCD/CEP89/TTLL9/CCDC65/BBS1/NME8/DNAH1/TEKT4/DCDC2C/DNAI1/WDR19/AK8/SPATA33/KIF9/CFAP58/DNAI2/BBS2/PMFBP1/TEKT2/CFAP221/ATP1B3/IQCG/CROCC/PGK2/SPEF1/TMEM262/ADGB	48
GO:0032838	CC	GO:0032838	plasma membrane bounded cell projection cytoplasm	47/804	244/19518	5.36312e-19	6.86479e-17	6.25227e-17	CFAP70/DNAJB13/DNAH6/SPATA7/DNAH11/TEKT3/CFAP54/CFAP43/ABHD12/CCDC40/RPGRIP1L/GAS8/IFT140/BBS5/CCSAP/IFT172/SPAG8/SPAG17/CFAP74/CCDC65/BBS1/NME8/DNAH7/DNAH1/EFHC1/CFAP46/TEKT4/DNAAF1/DNAI1/CFAP53/AK8/ARL8A/KIF17/LRRC43/RPGRIP1/DNAI2/WDPCP/CENPF/HYDIN/TEKT2/CFAP221/FAM166B/CCDC96/FLOT2/DZIP1L/SPEF1/SPG7	47
GO:0099568	CC	GO:0099568	cytoplasmic region	50/804	283/19518	1.84547e-18	1.88976e-16	1.72114e-16	CFAP70/DNAJB13/DNAH6/SPATA7/DNAH11/TEKT3/CFAP54/CFAP43/ABHD12/CCDC40/RPGRIP1L/GAS8/IFT140/BBS5/CCSAP/HAMP/IFT172/SPAG8/SPAG17/CFAP74/CCDC65/BBS1/NME8/DNAH7/DNAH1/EFHC1/CFAP46/TEKT4/CTBP2/DNAAF1/DNAI1/CFAP53/AK8/ARL8A/KIF17/LRRC43/RPGRIP1/DNAI2/WDPCP/CENPF/HYDIN/TEKT2/CFAP221/FAM166B/CCDC96/GPSM2/FLOT2/DZIP1L/SPEF1/SPG7	50
GO:0036064	CC	GO:0036064	ciliary basal body	37/804	167/19518	2.60488e-17	2.22283e-15	2.0245e-15	CFAP70/PKHD1/DLG5/FANK1/SPATA7/IFT46/AHI1/AGBL2/MKS1/CBY1/RPGRIP1L/GAS8/IFT140/BBS5/CCSAP/IFT122/PPP1R32/IFT88/ENKD1/IFT172/INTU/IQCD/TTLL9/GAS2L2/CCDC65/CEP290/CDK10/B9D1/CCDC170/KIF17/CENPF/BBS2/NPHP4/CCDC96/TTLL4/DZIP1L/RABL2B	37
GO:0097729	CC	GO:0097729	9+2 motile cilium	30/804	167/19518	8.65776e-12	6.33253e-10	5.7675e-10	SPATA6L/CFAP70/DNAJB13/DNAH11/TEKT3/IFT27/CFAP69/CFAP43/ENO4/GAS8/SPEF2/IFT88/IFT172/NME8/DNAH1/TEKT4/DCDC2C/DNAI1/AK8/SPATA33/KIF9/CFAP58/DNAI2/PMFBP1/CFAP221/ATP1B3/IQCG/CROCC/PGK2/SPEF1	30
GO:0035869	CC	GO:0035869	ciliary transition zone	19/804	71/19518	4.47597e-11	2.86462e-09	2.60902e-09	SPATA7/AHI1/MKS1/RPGRIP1L/NPHP1/IFT140/TMEM17/CCSAP/IFT122/INTU/CEP290/TMEM231/B9D1/TCTN1/WDR19/KIF17/RPGRIP1/NPHP4/CC2D2A	19
GO:0036126	CC	GO:0036126	sperm flagellum	25/804	153/19518	3.65962e-09	2.08192e-07	1.89615e-07	SPATA6L/CFAP70/DNAJB13/TEKT3/IFT27/CFAP69/ENO4/GAS8/SPEF2/IFT88/IFT172/NME8/DNAH1/TEKT4/DCDC2C/AK8/SPATA33/KIF9/CFAP58/DNAI2/PMFBP1/CFAP221/ATP1B3/IQCG/PGK2	25
GO:0036038	CC	GO:0036038	MKS complex	8/804	13/19518	8.57928e-09	4.39259e-07	4.00065e-07	AHI1/MKS1/TMEM17/CEP290/TMEM231/B9D1/TCTN1/CC2D2A	8
GO:0005874	CC	GO:0005874	microtubule	47/804	461/19518	1.07778e-08	5.01656e-07	4.56895e-07	DNAH6/DNAH11/TEKT3/KIF12/TUBGCP2/KIFC3/RPGRIP1L/TRIM55/GAS8/HAUS2/KATNB1/CCSAP/NCKAP5L/ENKD1/SPAG8/C4orf47/SPAG17/TTLL9/GAS2L2/STMN1/CCDC57/DNAH7/DNAH1/EFHC1/TUBA4B/TEKT4/DCDC2C/NUSAP1/DNAI1/CFAP53/KIF15/DCDC1/SKA2/KATNAL2/KIF24/KIF9/KIF17/TTLL5/DNAI2/MID1/TEKT2/FAM166B/ASPM/TTLL4/SPEF1/CEP170B/INVS	47
GO:0030990	CC	GO:0030990	intraciliary transport particle	10/804	24/19518	1.54357e-08	6.5859e-07	5.99826e-07	IFT74/IFT46/IFT27/TTC21A/IFT140/IFT122/IFT88/IFT172/IFT43/WDR19	10
GO:0005814	CC	GO:0005814	centriole	23/804	157/19518	1.23717e-07	4.87254e-06	4.43777e-06	AHI1/AGBL2/MKS1/CBY1/TSGA10/IFT140/CCSAP/IFT88/ENKD1/INTU/CEP89/CEP290/IFT43/CCDC57/CEP164/KIF24/CEP83/CCDC78/KIAA0753/CROCC/NPHP4/DZIP1L/RABL2B	23
GO:0005819	CC	GO:0005819	spindle	39/804	421/19518	2.17814e-06	7.96578e-05	7.25502e-05	PKHD1/FBXO5/WDR73/TUBGCP2/MMS19/HAUS2/KATNB1/CCSAP/ALPK1/ENKD1/SAC3D1/SPAG8/CEP89/RAD21/CCDC57/EFHC1/CHAMP1/MICAL3/DNAAF1/CTTN/NUSAP1/KIF15/DCDC1/STAG1/SKA2/KATNAL2/FAM83D/ARL8A/CKAP2L/CENPF/MID1/ASPM/TBCK/GPSM2/AAAS/ANKRD53/ANAPC5/INVS/CBX1	39
GO:0032391	CC	GO:0032391	photoreceptor connecting cilium	10/804	41/19518	4.66776e-06	0.000156477	0.000142515	SPATA7/RPGRIP1L/NPHP1/IFT140/IFT122/CEP290/WDR19/KIF17/RPGRIP1/NPHP4	10
GO:0097730	CC	GO:0097730	non-motile cilium	21/804	166/19518	4.8899e-06	0.000156477	0.000142515	PKHD1/GUCA1B/SPATA7/AHI1/PEX6/CFAP69/RPGRIP1L/NPHP1/IFT140/IFT122/IFT88/ENKD1/C4orf47/CEP89/CEP290/WDR19/KIF17/RPGRIP1/NPHP4/TTLL4/USH1C	21
GO:0005875	CC	GO:0005875	microtubule associated complex	20/804	156/19518	6.669e-06	0.000200855	0.000182933	CFAP70/DNAH6/DNAH11/KIF12/KIFC3/HAUS2/KATNB1/CCDC65/NME8/DNAH7/DNAH1/DNAI1/KIF15/KATNAL2/PEA15/KIF9/KIF17/DNAI2/MID1/PXN	20
GO:0005858	CC	GO:0005858	axonemal dynein complex	7/804	22/19518	1.94319e-05	0.00055273	0.000503412	CFAP70/CCDC65/NME8/DNAH7/DNAH1/DNAI1/DNAI2	7
GO:0097542	CC	GO:0097542	ciliary tip	10/804	48/19518	2.0974e-05	0.000565194	0.000514763	IFT74/IFT46/IFT27/IFT140/IFT122/IFT88/IFT172/IFT43/WDR19/SPEF1	10
GO:0030894	CC	GO:0030894	replisome	6/804	16/19518	2.69278e-05	0.000689352	0.000627843	PCNA/PRIM1/MCM3/RPA2/POLA2/RPA3	6
GO:0097731	CC	GO:0097731	9+0 non-motile cilium	17/804	132/19518	3.03589e-05	0.00074018	0.000674136	PKHD1/GUCA1B/SPATA7/PEX6/RPGRIP1L/NPHP1/IFT140/IFT122/ENKD1/C4orf47/CEP290/WDR19/KIF17/RPGRIP1/NPHP4/TTLL4/USH1C	17
GO:0043596	CC	GO:0043596	nuclear replication fork	8/804	35/19518	7.0011e-05	0.00162935	0.00148397	PCNA/PRIM1/MCM3/RPA2/MMS22L/POLA2/MCM10/RPA3	8
GO:0002177	CC	GO:0002177	manchette	6/804	19/19518	8.20447e-05	0.00182639	0.00166342	SPEF2/SPAG17/CFAP221/IQCG/MEIG1/LRGUK	6
GO:0005879	CC	GO:0005879	axonemal microtubule	8/804	37/19518	0.000106769	0.00227775	0.00207451	TEKT3/RPGRIP1L/SPAG8/EFHC1/TEKT4/CFAP53/TEKT2/FAM166B	8
GO:0043601	CC	GO:0043601	nuclear replisome	5/804	14/19518	0.000171878	0.00352006	0.00320597	PRIM1/MCM3/RPA2/POLA2/RPA3	5
GO:0000922	CC	GO:0000922	spindle pole	18/804	171/19518	0.000252594	0.00497416	0.00453033	WDR73/TUBGCP2/KATNB1/ALPK1/ENKD1/CEP89/RAD21/EFHC1/DNAAF1/STAG1/KATNAL2/FAM83D/CKAP2L/CENPF/ASPM/GPSM2/AAAS/ANKRD53	18
GO:0005881	CC	GO:0005881	cytoplasmic microtubule	13/804	102/19518	0.000282906	0.00536473	0.00488605	TEKT3/TUBGCP2/RPGRIP1L/CCSAP/ENKD1/SPAG8/C4orf47/EFHC1/TEKT4/CFAP53/MID1/TEKT2/FAM166B	13
GO:0030286	CC	GO:0030286	dynein complex	9/804	54/19518	0.000328313	0.00600343	0.00546776	CFAP70/DNAH6/DNAH11/CCDC65/NME8/DNAH7/DNAH1/DNAI1/DNAI2	9
GO:0030992	CC	GO:0030992	intraciliary transport particle B	5/804	17/19518	0.000479217	0.00846065	0.00770573	IFT74/IFT46/IFT27/IFT88/IFT172	5
GO:0036157	CC	GO:0036157	outer dynein arm	4/804	11/19518	0.000747717	0.0123494	0.0112475	CFAP70/NME8/DNAI1/DNAI2	4
GO:0071162	CC	GO:0071162	CMG complex	4/804	11/19518	0.000747717	0.0123494	0.0112475	MCM6/MCM5/MCM3/GINS2	4
GO:0000228	CC	GO:0000228	nuclear chromosome	20/804	223/19518	0.000950462	0.0152074	0.0138505	HUS1/REC8/MCM6/PCNA/MCM5/PRIM1/MCM3/RAD21/RPA2/E2F1/NCAPG2/GINS2/MMS22L/RAD51/POLA2/MCM10/RAD9A/NCAPH/RGS12/RPA3	20
GO:0005839	CC	GO:0005839	proteasome core complex	5/804	20/19518	0.00108342	0.0158742	0.0144578	PSMB1/PSMA2/PSMA7/PSMB6/PSMA3	5
GO:0120293	CC	GO:0120293	dynein axonemal particle	5/804	20/19518	0.00108342	0.0158742	0.0144578	DNAAF3/NME9/DNAI1/DNAI2/ZMYND10	5
GO:0031261	CC	GO:0031261	DNA replication preinitiation complex	4/804	12/19518	0.00108515	0.0158742	0.0144578	MCM6/MCM5/MCM3/GINS2	4
GO:0097733	CC	GO:0097733	photoreceptor cell cilium	13/804	120/19518	0.00134681	0.0191546	0.0174455	GUCA1B/SPATA7/PEX6/RPGRIP1L/NPHP1/IFT140/IFT122/CEP290/WDR19/KIF17/RPGRIP1/NPHP4/USH1C	13
GO:0005657	CC	GO:0005657	replication fork	9/804	66/19518	0.00147298	0.0203829	0.0185642	PCNA/PRIM1/MCM3/RPA2/HMCES/MMS22L/POLA2/MCM10/RPA3	9
GO:0000502	CC	GO:0000502	proteasome complex	8/804	60/19518	0.00307702	0.0414588	0.0377595	PSMB1/PSMA2/PSMC1/PSMA7/PSMB6/PSMC3/PSMC2/PSMA3	8
GO:0015631	MF	GO:0015631	tubulin binding	34/816	374/18369	6.49013e-05	0.033697	0.033697	IFT74/KIF12/TUBGCP2/KIFC3/GAS8/KATNB1/CCSAP/ENKD1/SPAG8/TTLL9/GAS2L2/NME8/STMN1/EFHC1/CACYBP/PEX14/NUSAP1/KIF15/DCDC1/CCDC170/SKA2/KATNAL2/FAM83D/KIF24/ARL8A/KIF9/KIF17/TTLL5/VBP1/CENPF/MID1/TTLL4/DLEC1/SPEF1	34
GO:0003777	MF	GO:0003777	microtubule motor activity	12/816	73/18369	8.24895e-05	0.033697	0.033697	DNAH6/DNAH11/KIF12/KIFC3/DNAH7/DNAH1/DNAI1/KIF15/KIF24/KIF9/KIF17/DNAI2	12
