# Supplementary material for: Impairment of FBXO31-mediated Ubiquitination of OGT Upregulates O-GlcNAcylation to Advance Endometrial Malignancy
Source: Research Square preprint supplement (doi:10.21203/rs.3.rs-4019799/v1), 2024-04-12
Supplement: Supplementary file 7 [file 981fc4c1bfc749a3288c7d81.xlsx]

## Sheet: Sheet1
Supplementary Table 6. RL2_pos_vs_RL2_ctrl genes summarized with MAGeCK-RRA
id	num	pos|score	pos|p.value	pos|fdr	pos|rank	pos|goodsgrna	pos|lfc	pos|goodsgrna_adjust	ncbiURL
SPP1	6	2.5411e-05	0.00014755	0.860767	1	3	0.44602	3	https://www.ncbi.nlm.nih.gov/gene/6696
FAM115A	6	3.9503e-05	0.0002251	0.860767	2	4	1.1164	4	https://www.ncbi.nlm.nih.gov/gene/9747
RNF165	6	4.0276e-05	0.00022966	0.860767	3	4	2.3006	4	https://www.ncbi.nlm.nih.gov/gene/494470
CLPS	6	5.0515e-05	0.00027572	0.860767	4	6	2.2004	6	https://www.ncbi.nlm.nih.gov/gene/1208
TSC2	6	5.6946e-05	0.00030856	0.860767	5	6	1.9118	6	https://www.ncbi.nlm.nih.gov/gene/7249
CCDC154	5	6.3528e-05	0.00028895	0.860767	6	3	0.44714	3	https://www.ncbi.nlm.nih.gov/gene/645811
MFRP	5	6.9698e-05	0.00031723	0.860767	7	3	0.75898	3	https://www.ncbi.nlm.nih.gov/gene/83552
NOD2	6	7.0417e-05	0.00037881	0.913641	8	4	2.3083	4	https://www.ncbi.nlm.nih.gov/gene/64127
DUX2	5	0.00010576	0.00048463	0.927682	9	3	2.44	3	https://www.ncbi.nlm.nih.gov/gene/26583
CHTF18	6	0.00011391	0.00062374	0.927682	10	6	1.3644	6	https://www.ncbi.nlm.nih.gov/gene/63922
EXOG	6	0.00011861	0.00064564	0.927682	11	5	2.1952	5	https://www.ncbi.nlm.nih.gov/gene/9941
NonTargetingControlGuideForHuman_0116	1	0.00012282	0.00012475	0.860767	12	1	5.5261	1	NA
AFF4	6	0.00012705	0.00069307	0.927682	13	2	0.12125	2	https://www.ncbi.nlm.nih.gov/gene/27125
TMC8	6	0.00013094	0.00071634	0.927682	14	5	2.2189	5	https://www.ncbi.nlm.nih.gov/gene/147138
hsa-mir-6124	4	0.00015215	0.00059045	0.927682	15	3	2.4965	3	https://www.ncbi.nlm.nih.gov/gene/102466906
IL1RL2	6	0.00015998	0.00087643	0.927682	16	4	1.6655	4	https://www.ncbi.nlm.nih.gov/gene/8808
THY1	6	0.00016375	0.00089331	0.927682	17	4	2.1285	4	https://www.ncbi.nlm.nih.gov/gene/7070
HP1BP3	6	0.00017787	0.00096903	0.927682	18	3	0.22065	3	https://www.ncbi.nlm.nih.gov/gene/50809
MYH13	6	0.00019845	0.0010612	0.927682	19	3	0.48243	3	https://www.ncbi.nlm.nih.gov/gene/8735
TAGLN3	5	0.00021282	0.0010105	0.927682	20	5	1.3652	5	https://www.ncbi.nlm.nih.gov/gene/29114
EHBP1L1	6	0.00022005	0.001172	0.927682	21	4	1.2447	4	https://www.ncbi.nlm.nih.gov/gene/254102
CYFIP1	6	0.00022868	0.0012103	0.927682	22	4	0.5818	4	https://www.ncbi.nlm.nih.gov/gene/23191
SYT14	5	0.00024853	0.0011693	0.927682	23	3	0.54267	3	https://www.ncbi.nlm.nih.gov/gene/255928
BCAN	6	0.00025352	0.0013453	0.927682	24	5	2.2313	5	https://www.ncbi.nlm.nih.gov/gene/63827
LRRC24	6	0.00026585	0.0014229	0.927682	25	6	1.5621	6	https://www.ncbi.nlm.nih.gov/gene/441381
FAXC	6	0.0003049	0.0016199	0.927682	26	3	0.052776	3	https://www.ncbi.nlm.nih.gov/gene/84553
NXF1	6	0.0003049	0.0016199	0.927682	27	4	1.1009	4	https://www.ncbi.nlm.nih.gov/gene/10482
DERA	6	0.00031219	0.0016596	0.927682	28	6	1.31	6	https://www.ncbi.nlm.nih.gov/gene/51071
OPRD1	6	0.00032926	0.0017545	0.927682	29	6	1.644	6	https://www.ncbi.nlm.nih.gov/gene/4985
RGS9	6	0.00033504	0.0017866	0.927682	30	5	1.6804	5	https://www.ncbi.nlm.nih.gov/gene/8787
BATF2	5	0.00035995	0.0016751	0.927682	31	1	-0.11317	1	https://www.ncbi.nlm.nih.gov/gene/116071
TUSC3	6	0.00037125	0.001972	0.927682	32	5	1.757	5	https://www.ncbi.nlm.nih.gov/gene/7991
HLA-DMB	6	0.00038111	0.0020231	0.927682	33	4	0.81144	4	https://www.ncbi.nlm.nih.gov/gene/3109
SPINT4	6	0.00038125	0.0020236	0.927682	34	6	1.8825	6	https://www.ncbi.nlm.nih.gov/gene/391253
HDAC1	6	0.00038884	0.0020614	0.927682	35	6	1.3256	6	https://www.ncbi.nlm.nih.gov/gene/3065
hsa-mir-148b	4	0.00038959	0.0014689	0.927682	36	3	1.421	3	NA
hsa-mir-6858	4	0.00041809	0.0015702	0.927682	37	3	2.4386	3	https://www.ncbi.nlm.nih.gov/gene/102465517
FAM171A2	5	0.00042346	0.0019602	0.927682	38	1	-0.33377	1	https://www.ncbi.nlm.nih.gov/gene/284069
CSB-PGBD3	6	0.00043114	0.0022712	0.927682	39	2	-0.53481	2	https://www.ncbi.nlm.nih.gov/gene/2074
ASB16	6	0.00045099	0.0023657	0.927682	40	5	2.0066	5	https://www.ncbi.nlm.nih.gov/gene/92591
NDUFAF7	5	0.00045331	0.0021011	0.927682	41	4	2.2816	4	https://www.ncbi.nlm.nih.gov/gene/55471
ZWILCH	5	0.00046212	0.0021381	0.927682	42	5	1.9443	5	https://www.ncbi.nlm.nih.gov/gene/55055
GTF2H2D	4	0.00047347	0.0017809	0.927682	43	3	2.0428	3	https://www.ncbi.nlm.nih.gov/gene/730394
ATP6V0A1	6	0.00048122	0.0025089	0.927682	44	6	1.8066	6	https://www.ncbi.nlm.nih.gov/gene/535
POSTN	6	0.00050518	0.0026352	0.927682	45	4	1.9617	4	https://www.ncbi.nlm.nih.gov/gene/10631
KLRK1	6	0.00050813	0.0026471	0.927682	46	2	-0.10221	2	https://www.ncbi.nlm.nih.gov/gene/22914
COL9A3	6	0.0005106	0.0026626	0.927682	47	6	1.8163	6	https://www.ncbi.nlm.nih.gov/gene/1299
ST8SIA6	5	0.00051816	0.0024012	0.927682	48	2	-0.047977	2	https://www.ncbi.nlm.nih.gov/gene/338596
RERE	5	0.00052251	0.0024206	0.927682	49	5	1.5393	5	https://www.ncbi.nlm.nih.gov/gene/473
SRA1	5	0.00054493	0.0025148	0.927682	50	2	-3.7158	2	https://www.ncbi.nlm.nih.gov/gene/10011
CNTD2	6	0.00054892	0.0028774	0.927682	51	3	1.0408	3	https://www.ncbi.nlm.nih.gov/gene/79935
ABCC10	6	0.00057814	0.0030298	0.927682	52	3	0.93009	3	https://www.ncbi.nlm.nih.gov/gene/89845
FDXACB1	6	0.00058563	0.0030708	0.927682	53	6	1.2956	6	https://www.ncbi.nlm.nih.gov/gene/91893
RP1L1	6	0.00060705	0.0031762	0.927682	54	6	1.941	6	https://www.ncbi.nlm.nih.gov/gene/94137
DDX19A	6	0.00061349	0.0032081	0.927682	55	4	1.612	4	https://www.ncbi.nlm.nih.gov/gene/55308
hsa-mir-4526	4	0.00062223	0.0023255	0.927682	56	3	1.7694	3	NA
PPP1R12A	6	0.00062614	0.0032642	0.927682	57	4	1.7281	4	https://www.ncbi.nlm.nih.gov/gene/4659
LOC650293	6	0.00062646	0.0032656	0.927682	58	5	1.8175	5	https://www.ncbi.nlm.nih.gov/gene/650293
ICAM1	6	0.00063357	0.0032993	0.927682	59	3	0.94752	3	https://www.ncbi.nlm.nih.gov/gene/3383
SYPL2	6	0.00063512	0.0033048	0.927682	60	4	0.68166	4	https://www.ncbi.nlm.nih.gov/gene/284612
PIWIL3	6	0.00064684	0.0033609	0.927682	61	6	1.2755	6	https://www.ncbi.nlm.nih.gov/gene/440822
hsa-mir-4784	4	0.00065637	0.0024491	0.927682	62	3	2.4904	3	NA
CPLX1	6	0.00067813	0.0035105	0.927682	63	2	-1.7815	2	https://www.ncbi.nlm.nih.gov/gene/10815
SLC35E1	6	0.0006857	0.0035452	0.927682	64	4	1.8519	4	https://www.ncbi.nlm.nih.gov/gene/79939
WASH1	6	0.00068592	0.0035461	0.927682	65	2	-1.9475	2	https://www.ncbi.nlm.nih.gov/gene/100287171
UNCX	6	0.00071889	0.0037213	0.927682	66	6	1.5824	6	https://www.ncbi.nlm.nih.gov/gene/340260
PRLR	6	0.00072287	0.003739	0.927682	67	6	1.2816	6	https://www.ncbi.nlm.nih.gov/gene/5618
RAD51AP2	6	0.00072594	0.0037564	0.927682	68	6	1.1766	6	https://www.ncbi.nlm.nih.gov/gene/729475
hsa-mir-1289-2	4	0.00072827	0.0027091	0.927682	69	1	-3.7474	1	https://www.ncbi.nlm.nih.gov/gene/100302134
LRRC38	6	0.00074863	0.0038626	0.927682	70	3	0.62797	3	https://www.ncbi.nlm.nih.gov/gene/126755
DDX1	6	0.0007875	0.004051	0.927682	71	5	1.3625	5	https://www.ncbi.nlm.nih.gov/gene/1653
hsa-mir-6892	4	0.00079268	0.0029436	0.927682	72	3	2.4399	3	https://www.ncbi.nlm.nih.gov/gene/102465538
hsa-mir-4758	4	0.00079459	0.0029495	0.927682	73	3	1.9846	3	NA
PRDX1	5	0.00080743	0.0036533	0.927682	74	3	2.1612	3	https://www.ncbi.nlm.nih.gov/gene/5052
FTCD	6	0.00081283	0.0041751	0.927682	75	5	1.8011	5	https://www.ncbi.nlm.nih.gov/gene/10841
CNTNAP2	6	0.00081403	0.0041815	0.927682	76	5	1.4876	5	https://www.ncbi.nlm.nih.gov/gene/26047
EFNA1	6	0.0008179	0.0041938	0.927682	77	4	1.6964	4	https://www.ncbi.nlm.nih.gov/gene/1942
BAHCC1	6	0.00082446	0.0042285	0.927682	78	3	0.78924	3	https://www.ncbi.nlm.nih.gov/gene/57597
OBP2B	4	0.00083346	0.0030831	0.927682	79	4	1.6371	4	https://www.ncbi.nlm.nih.gov/gene/29989
CMTM6	6	0.00085138	0.0043744	0.927682	80	4	1.2672	4	https://www.ncbi.nlm.nih.gov/gene/54918
KLRG1	6	0.00085321	0.0043863	0.927682	81	4	1.4965	4	https://www.ncbi.nlm.nih.gov/gene/10219
PRKAA1	6	0.0008542	0.0043908	0.927682	82	2	-0.00013634	2	https://www.ncbi.nlm.nih.gov/gene/5562
EIF3K	6	0.00086035	0.00442	0.927682	83	6	1.8214	6	https://www.ncbi.nlm.nih.gov/gene/27335
WBP2NL	6	0.00086057	0.0044219	0.927682	84	3	-0.07848	3	https://www.ncbi.nlm.nih.gov/gene/164684
MYO3B	6	0.00086147	0.0044246	0.927682	85	4	2.0364	4	https://www.ncbi.nlm.nih.gov/gene/140469
CDC42EP4	6	0.00086369	0.0044374	0.927682	86	3	-0.29748	3	https://www.ncbi.nlm.nih.gov/gene/23580
CENPM	6	0.00086369	0.0044374	0.927682	87	2	-1.4069	2	https://www.ncbi.nlm.nih.gov/gene/79019
FGL2	6	0.00086621	0.0044474	0.927682	88	6	1.2257	6	https://www.ncbi.nlm.nih.gov/gene/10875
VAV2	6	0.00088771	0.0045676	0.927682	89	5	1.3859	5	https://www.ncbi.nlm.nih.gov/gene/7410
TRIM34	6	0.00089915	0.0046125	0.927682	90	5	1.8674	5	https://www.ncbi.nlm.nih.gov/gene/53840
RNF224	6	0.00090461	0.0046399	0.927682	91	6	2.076	6	https://www.ncbi.nlm.nih.gov/gene/643596
ECSCR	6	0.00090712	0.0046526	0.927682	92	4	1.664	4	https://www.ncbi.nlm.nih.gov/gene/641700
CCT8	6	0.00091852	0.0047051	0.927682	93	6	1.6458	6	https://www.ncbi.nlm.nih.gov/gene/10694
OR52J3	6	0.00092619	0.0047416	0.927682	94	4	1.7825	4	https://www.ncbi.nlm.nih.gov/gene/119679
TMEM167B	6	0.00092788	0.0047498	0.927682	95	5	1.409	5	https://www.ncbi.nlm.nih.gov/gene/56900
ALDH2	6	0.00093587	0.004794	0.927682	96	3	1.0577	3	https://www.ncbi.nlm.nih.gov/gene/217
DMP1	6	0.00093986	0.0048091	0.927682	97	2	-4.1125	2	https://www.ncbi.nlm.nih.gov/gene/1758
USE1	6	0.00094016	0.00481	0.927682	98	5	1.2586	5	https://www.ncbi.nlm.nih.gov/gene/55850
MAPK4	6	0.00094081	0.0048123	0.927682	99	4	1.4509	4	https://www.ncbi.nlm.nih.gov/gene/5596
UBE2I	6	0.00094251	0.0048214	0.927682	100	6	1.307	6	https://www.ncbi.nlm.nih.gov/gene/7329
KCNJ15	6	0.00095685	0.0048885	0.927682	101	5	1.7946	5	https://www.ncbi.nlm.nih.gov/gene/3772
ANKDD1A	6	0.00097557	0.0049706	0.927682	102	4	1.331	4	https://www.ncbi.nlm.nih.gov/gene/348094
SNRPA	5	0.0010012	0.0044624	0.927682	103	4	2.124	4	https://www.ncbi.nlm.nih.gov/gene/6626
AGTR1	6	0.001016	0.0051635	0.927682	104	4	1.2702	4	https://www.ncbi.nlm.nih.gov/gene/185
WDR7	6	0.0010198	0.0051781	0.927682	105	6	1.4797	6	https://www.ncbi.nlm.nih.gov/gene/23335
hsa-mir-4733	4	0.0010378	0.0038179	0.927682	106	2	0.78622	2	NA
NDUFAF3	6	0.0010595	0.0053861	0.927682	107	5	1.8402	5	https://www.ncbi.nlm.nih.gov/gene/25915
DBR1	6	0.0010605	0.0053893	0.927682	108	2	-2.3698	2	https://www.ncbi.nlm.nih.gov/gene/51163
ANO5	6	0.0010815	0.0054832	0.927682	109	5	1.7828	5	https://www.ncbi.nlm.nih.gov/gene/203859
GLYCTK	6	0.0010921	0.0055316	0.927682	110	4	1.0665	4	https://www.ncbi.nlm.nih.gov/gene/132158
PAK7	6	0.0011006	0.0055676	0.927682	111	2	0.18002	2	https://www.ncbi.nlm.nih.gov/gene/57144
HAP1	6	0.001143	0.0057774	0.927682	112	6	1.021	6	https://www.ncbi.nlm.nih.gov/gene/9001
FOLR1	6	0.0011435	0.0057797	0.927682	113	2	-0.20275	2	https://www.ncbi.nlm.nih.gov/gene/2348
APOBEC2	6	0.0011462	0.0057929	0.927682	114	4	1.7082	4	https://www.ncbi.nlm.nih.gov/gene/10930
PI16	6	0.0011486	0.0058048	0.927682	115	6	1.503	6	https://www.ncbi.nlm.nih.gov/gene/221476
TNN	6	0.001164	0.0058787	0.927682	116	6	1.1442	6	https://www.ncbi.nlm.nih.gov/gene/63923
ZCCHC17	6	0.0011908	0.006005	0.927682	117	5	1.3842	5	https://www.ncbi.nlm.nih.gov/gene/51538
DNAJB8	6	0.0011938	0.0060196	0.927682	118	3	-1.1284	3	https://www.ncbi.nlm.nih.gov/gene/165721
ZNF626	5	0.0011971	0.0053195	0.927682	119	4	1.9538	4	https://www.ncbi.nlm.nih.gov/gene/199777
PLEKHD1	6	0.0012041	0.006068	0.927682	120	4	1.9352	4	https://www.ncbi.nlm.nih.gov/gene/400224
POLR2G	6	0.0012182	0.0061401	0.927682	121	6	1.3184	6	https://www.ncbi.nlm.nih.gov/gene/5436
hsa-mir-4728	4	0.0012192	0.0044802	0.927682	122	3	1.4368	3	NA
COMT	6	0.0012289	0.0061857	0.927682	123	4	1.9312	4	https://www.ncbi.nlm.nih.gov/gene/1312
OR13A1	6	0.0012334	0.0062108	0.927682	124	5	1.845	5	https://www.ncbi.nlm.nih.gov/gene/79290
KRT2	6	0.0012364	0.0062249	0.927682	125	5	1.391	5	https://www.ncbi.nlm.nih.gov/gene/3849
FGFBP2	6	0.0012445	0.0062655	0.927682	126	1	-2.164	1	https://www.ncbi.nlm.nih.gov/gene/83888
COL8A2	6	0.0012449	0.0062678	0.927682	127	5	1.1978	5	https://www.ncbi.nlm.nih.gov/gene/1296
PDHA2	6	0.0012519	0.0063061	0.927682	128	4	1.9623	4	https://www.ncbi.nlm.nih.gov/gene/5161
CELF4	6	0.001257	0.0063312	0.927682	129	4	2.0443	4	https://www.ncbi.nlm.nih.gov/gene/56853
ALOX15	6	0.00126	0.0063494	0.927682	130	2	0.24613	2	https://www.ncbi.nlm.nih.gov/gene/246
GGTLC2	6	0.0012617	0.0063594	0.927682	131	4	1.7017	4	https://www.ncbi.nlm.nih.gov/gene/91227
COA4	6	0.0012691	0.0063932	0.927682	132	4	2.0265	4	https://www.ncbi.nlm.nih.gov/gene/51287
CCDC25	6	0.0012748	0.0064192	0.927682	133	6	1.0848	6	https://www.ncbi.nlm.nih.gov/gene/55246
NonTargetingControlGuideForHuman_0948	1	0.0012833	0.0012751	0.927682	134	1	4.3801	1	NA
hsa-mir-657	3	0.0012835	0.0036305	0.927682	135	2	2.9531	2	https://www.ncbi.nlm.nih.gov/gene/724027
NSUN5	6	0.0012953	0.0065145	0.927682	136	3	0.5324	3	https://www.ncbi.nlm.nih.gov/gene/55695
NAA30	6	0.0012994	0.006536	0.927682	137	3	1.0788	3	https://www.ncbi.nlm.nih.gov/gene/122830
TET1	6	0.0013011	0.0065437	0.927682	138	6	1.6747	6	https://www.ncbi.nlm.nih.gov/gene/80312
OLFM4	6	0.001307	0.0065679	0.927682	139	5	1.5754	5	https://www.ncbi.nlm.nih.gov/gene/10562
FUCA2	6	0.0013128	0.0065921	0.927682	140	3	0.20902	3	https://www.ncbi.nlm.nih.gov/gene/2519
LRRFIP1	6	0.0013291	0.0066587	0.927682	141	3	-1.207	3	https://www.ncbi.nlm.nih.gov/gene/9208
PPRC1	6	0.0013352	0.006692	0.927682	142	6	1.4899	6	https://www.ncbi.nlm.nih.gov/gene/23082
BOD1L1	6	0.0013366	0.0066979	0.927682	143	5	1.5214	5	https://www.ncbi.nlm.nih.gov/gene/259282
PCDHB8	6	0.0013441	0.0067312	0.927682	144	4	1.7637	4	https://www.ncbi.nlm.nih.gov/gene/56128
TOMM20	6	0.0013461	0.0067412	0.927682	145	5	1.1406	5	https://www.ncbi.nlm.nih.gov/gene/9804
OR2G2	6	0.0013713	0.0068662	0.927682	146	3	-0.18735	3	https://www.ncbi.nlm.nih.gov/gene/81470
CPA6	6	0.0013808	0.0069182	0.927682	147	2	-0.075802	2	https://www.ncbi.nlm.nih.gov/gene/57094
CSAG1	6	0.0013903	0.0069629	0.927682	148	3	-0.86412	3	https://www.ncbi.nlm.nih.gov/gene/158511
RABGEF1	6	0.0013977	0.0070003	0.927682	149	4	1.8819	4	https://www.ncbi.nlm.nih.gov/gene/27342
HIST1H2AG	6	0.0013996	0.0070081	0.927682	150	6	1.7614	6	https://www.ncbi.nlm.nih.gov/gene/8969
DBN1	6	0.0014073	0.0070509	0.927682	151	5	1.5889	5	https://www.ncbi.nlm.nih.gov/gene/1627
HOXB7	6	0.0014222	0.007138	0.927682	152	3	0.2052	3	https://www.ncbi.nlm.nih.gov/gene/3217
TRIM2	6	0.0014222	0.007138	0.927682	153	4	0.78751	4	https://www.ncbi.nlm.nih.gov/gene/23321
DEPDC1B	6	0.0014324	0.0071823	0.927682	154	3	0.49612	3	https://www.ncbi.nlm.nih.gov/gene/55789
YBEY	6	0.0014357	0.0071973	0.927682	155	6	1.3416	6	https://www.ncbi.nlm.nih.gov/gene/54059
SPARCL1	6	0.0014364	0.0072019	0.927682	156	5	1.868	5	https://www.ncbi.nlm.nih.gov/gene/8404
ZRANB2	6	0.001447	0.0072466	0.927682	157	5	1.8524	5	https://www.ncbi.nlm.nih.gov/gene/9406
TGM1	6	0.0014615	0.0073032	0.927682	158	4	1.5361	4	https://www.ncbi.nlm.nih.gov/gene/7051
TMED2	6	0.0014723	0.0073577	0.927682	159	4	1.7994	4	https://www.ncbi.nlm.nih.gov/gene/10959
hsa-mir-6834	4	0.0014816	0.0054276	0.927682	160	2	1.6014	2	https://www.ncbi.nlm.nih.gov/gene/102465501
CRYBB3	6	0.0014905	0.0074537	0.927682	161	6	1.5644	6	https://www.ncbi.nlm.nih.gov/gene/1417
KCNE1L	6	0.0014971	0.0074915	0.927682	162	3	0.55256	3	https://www.ncbi.nlm.nih.gov/gene/23630
WDSUB1	6	0.0014984	0.0074966	0.927682	163	2	-0.8753	2	https://www.ncbi.nlm.nih.gov/gene/151525
ABCB8	6	0.0015022	0.0075143	0.927682	164	5	1.3093	5	https://www.ncbi.nlm.nih.gov/gene/11194
GEMIN2	6	0.0015232	0.0076265	0.927682	165	5	1.6615	5	https://www.ncbi.nlm.nih.gov/gene/8487
TXLNA	6	0.0015383	0.0077009	0.927682	166	5	1.4911	5	https://www.ncbi.nlm.nih.gov/gene/200081
LCMT2	4	0.0015408	0.0056424	0.927682	167	1	-0.54997	1	https://www.ncbi.nlm.nih.gov/gene/9836
TRIM11	6	0.0015972	0.0079887	0.927682	168	4	1.6962	4	https://www.ncbi.nlm.nih.gov/gene/81559
FANCB	6	0.0016214	0.0081091	0.927682	169	6	0.90232	6	https://www.ncbi.nlm.nih.gov/gene/2187
FXYD1	6	0.0016252	0.0081278	0.927682	170	4	0.91766	3	https://www.ncbi.nlm.nih.gov/gene/5348
PDCL3	6	0.0016252	0.0081278	0.927682	171	3	0.77288	3	https://www.ncbi.nlm.nih.gov/gene/79031
PTPRH	6	0.0016252	0.0081278	0.927682	172	3	0.14351	3	https://www.ncbi.nlm.nih.gov/gene/5794
FAM71F1	6	0.0016464	0.0082355	0.927682	173	5	0.80141	5	https://www.ncbi.nlm.nih.gov/gene/84691
hsa-mir-4706	4	0.0016494	0.0060174	0.927682	174	3	1.7701	3	NA
GATA2	6	0.0016569	0.008287	0.927682	175	6	1.1479	6	https://www.ncbi.nlm.nih.gov/gene/2624
SLC22A12	5	0.0016597	0.00732	0.927682	176	5	1.2818	5	https://www.ncbi.nlm.nih.gov/gene/116085
PRMT6	6	0.0016643	0.0083212	0.927682	177	6	1.722	6	https://www.ncbi.nlm.nih.gov/gene/55170
ZFPM2	6	0.0016684	0.0083376	0.927682	178	4	1.1121	4	https://www.ncbi.nlm.nih.gov/gene/23414
hsa-mir-4690	4	0.0016761	0.0061068	0.927682	179	2	0.94894	2	NA
hsa-mir-1268b	4	0.0016761	0.0061068	0.927682	180	3	2.1611	3	NA
NBEA	6	0.0016826	0.0084093	0.927682	181	4	1.6121	4	https://www.ncbi.nlm.nih.gov/gene/26960
MLLT1	6	0.0016828	0.0084102	0.927682	182	6	1.5632	6	https://www.ncbi.nlm.nih.gov/gene/4298
NTS	6	0.0017169	0.0085721	0.927682	183	3	0.2703	3	https://www.ncbi.nlm.nih.gov/gene/4922
TMEM120B	6	0.0017269	0.0086172	0.927682	184	5	1.4777	5	https://www.ncbi.nlm.nih.gov/gene/144404
PPAT	6	0.0017413	0.0086902	0.927682	185	6	1.3305	6	https://www.ncbi.nlm.nih.gov/gene/5471
SLC22A2	6	0.0017434	0.0087021	0.927682	186	3	0.83353	3	https://www.ncbi.nlm.nih.gov/gene/6582
SYT6	6	0.0017521	0.0087431	0.927682	187	3	0.39223	3	https://www.ncbi.nlm.nih.gov/gene/148281
ARL10	6	0.0017525	0.0087454	0.927682	188	6	1.7187	6	https://www.ncbi.nlm.nih.gov/gene/285598
HPS5	6	0.00176	0.0087824	0.927682	189	6	1.6022	6	https://www.ncbi.nlm.nih.gov/gene/11234
ACTR1B	5	0.0017853	0.007866	0.927682	190	2	-0.40623	2	https://www.ncbi.nlm.nih.gov/gene/10120
LAGE3	6	0.0018067	0.009004	0.927682	191	4	1.4745	4	https://www.ncbi.nlm.nih.gov/gene/8270
KCNK10	6	0.0018088	0.0090163	0.927682	192	6	1.2104	6	https://www.ncbi.nlm.nih.gov/gene/54207
GRHL3	6	0.0018196	0.0090747	0.927682	193	6	0.98915	6	https://www.ncbi.nlm.nih.gov/gene/57822
EPHB4	6	0.0018208	0.0090788	0.927682	194	5	1.6347	5	https://www.ncbi.nlm.nih.gov/gene/2050
ST20	6	0.0018253	0.0091053	0.927682	195	4	1.8682	4	https://www.ncbi.nlm.nih.gov/gene/400410
LRRK2	6	0.0018282	0.0091176	0.927682	196	3	0.81296	3	https://www.ncbi.nlm.nih.gov/gene/120892
OR2AK2	6	0.0018412	0.009181	0.927682	197	5	1.3239	5	https://www.ncbi.nlm.nih.gov/gene/391191
TSPAN7	6	0.0018459	0.0092079	0.927682	198	4	1.411	4	https://www.ncbi.nlm.nih.gov/gene/7102
SREK1	6	0.0018694	0.0093233	0.927682	199	6	0.89163	6	https://www.ncbi.nlm.nih.gov/gene/140890
PPP2R4	6	0.0018747	0.0093534	0.927682	200	6	0.88619	6	https://www.ncbi.nlm.nih.gov/gene/5524
TPX2	6	0.0018969	0.00947	0.927682	201	3	-0.8198	3	https://www.ncbi.nlm.nih.gov/gene/22974
CNOT8	6	0.0019044	0.0095021	0.927682	202	4	0.92368	4	https://www.ncbi.nlm.nih.gov/gene/9337
GPR182	6	0.0019551	0.0097562	0.927682	203	1	-2.0249	1	https://www.ncbi.nlm.nih.gov/gene/11318
SYTL3	6	0.0019577	0.0097694	0.927682	204	5	1.4947	5	https://www.ncbi.nlm.nih.gov/gene/94120
UBC	6	0.0019795	0.0098793	0.927682	205	2	-0.59454	2	https://www.ncbi.nlm.nih.gov/gene/7316
C7orf71	6	0.0019889	0.0099213	0.927682	206	6	0.77573	6	https://www.ncbi.nlm.nih.gov/gene/285941
hsa-mir-1267	4	0.0019968	0.0072639	0.927682	207	2	1.0115	2	https://www.ncbi.nlm.nih.gov/gene/100302286
PDDC1	6	0.0020046	0.0099934	0.927682	208	5	1.7799	5	https://www.ncbi.nlm.nih.gov/gene/347862
GALT	6	0.0020053	0.0099961	0.927682	209	6	0.9659	6	https://www.ncbi.nlm.nih.gov/gene/2592
SOGA2	6	0.0020053	0.0099961	0.927682	210	6	1.423	6	https://www.ncbi.nlm.nih.gov/gene/23255
UBR7	6	0.0020058	0.01	0.927682	211	3	-0.39257	3	https://www.ncbi.nlm.nih.gov/gene/55148
NPTX2	6	0.0020096	0.010023	0.927682	212	6	1.1938	6	https://www.ncbi.nlm.nih.gov/gene/4885
SLC1A2	6	0.002052	0.010222	0.927682	213	6	0.79469	6	https://www.ncbi.nlm.nih.gov/gene/6506
RABL2B	5	0.0020564	0.0089903	0.927682	214	4	1.8023	4	https://www.ncbi.nlm.nih.gov/gene/11158
hsa-mir-5001	3	0.0020604	0.005772	0.927682	215	3	3.0109	3	NA
NFYC	6	0.0020717	0.010313	0.927682	216	6	1.6351	6	https://www.ncbi.nlm.nih.gov/gene/4802
OR52K2	5	0.002081	0.0090994	0.927682	217	5	1.6983	5	https://www.ncbi.nlm.nih.gov/gene/119774
OVCH1	6	0.0020957	0.010414	0.927682	218	3	0.60729	3	https://www.ncbi.nlm.nih.gov/gene/341350
hsa-mir-1285-2	4	0.002099	0.0076293	0.927682	219	3	1.0746	3	https://www.ncbi.nlm.nih.gov/gene/100302268
ITGAV	6	0.0021073	0.010463	0.927682	220	4	0.71619	4	https://www.ncbi.nlm.nih.gov/gene/3685
ACTA2	6	0.0021073	0.010463	0.927682	221	3	-0.3962	3	https://www.ncbi.nlm.nih.gov/gene/59
PPP1R35	6	0.0021073	0.010463	0.927682	222	2	0.13176	2	https://www.ncbi.nlm.nih.gov/gene/221908
TCHHL1	6	0.0021182	0.010506	0.927682	223	6	1.514	6	https://www.ncbi.nlm.nih.gov/gene/126637
DPP3	6	0.0021243	0.010538	0.927682	224	5	1.6731	5	https://www.ncbi.nlm.nih.gov/gene/10072
PERP	6	0.0021291	0.010555	0.927682	225	5	1.8315	5	https://www.ncbi.nlm.nih.gov/gene/64065
CUTA	6	0.0021355	0.010589	0.927682	226	4	1.6389	4	https://www.ncbi.nlm.nih.gov/gene/51596
LGALS9C	4	0.0021594	0.0078345	0.927682	227	4	1.2141	4	https://www.ncbi.nlm.nih.gov/gene/654346
PRR5	6	0.0021886	0.010843	0.927682	228	6	1.4059	6	https://www.ncbi.nlm.nih.gov/gene/55615
ACR	6	0.0022214	0.01099	0.927682	229	6	1.5162	6	https://www.ncbi.nlm.nih.gov/gene/49
MGAT2	6	0.0022362	0.011058	0.927682	230	4	1.7431	4	https://www.ncbi.nlm.nih.gov/gene/4247
THBS3	6	0.0022587	0.011161	0.927682	231	5	1.455	5	https://www.ncbi.nlm.nih.gov/gene/7059
WTIP	6	0.0022623	0.011181	0.927682	232	3	0.77158	3	https://www.ncbi.nlm.nih.gov/gene/126374
hsa-mir-3686	4	0.0022684	0.0082067	0.927682	233	2	1.6456	2	NA
SMDT1	5	0.0022773	0.0099473	0.927682	234	4	1.5249	4	https://www.ncbi.nlm.nih.gov/gene/91689
UXT	6	0.0022778	0.011256	0.927682	235	4	1.2777	4	https://www.ncbi.nlm.nih.gov/gene/8409
TSR2	6	0.0022873	0.011304	0.927682	236	2	-0.45701	2	https://www.ncbi.nlm.nih.gov/gene/90121
S100A7A	6	0.0022938	0.011332	0.927682	237	5	1.9724	5	https://www.ncbi.nlm.nih.gov/gene/338324
TMTC4	6	0.002296	0.011339	0.927682	238	5	1.9886	5	https://www.ncbi.nlm.nih.gov/gene/84899
GLP1R	6	0.0023001	0.011355	0.927682	239	4	1.7447	4	https://www.ncbi.nlm.nih.gov/gene/2740
UBP1	6	0.0023079	0.011392	0.927682	240	6	1.1909	6	https://www.ncbi.nlm.nih.gov/gene/7342
RNF4	6	0.0023086	0.011397	0.927682	241	3	0.62938	3	https://www.ncbi.nlm.nih.gov/gene/6047
hsa-mir-4287	4	0.0023112	0.0083545	0.927682	242	3	1.7371	3	NA
hsa-mir-4647	4	0.0023255	0.0084065	0.927682	243	4	1.8751	4	NA
NCOA6	6	0.0023499	0.011589	0.927682	244	3	0.56823	3	https://www.ncbi.nlm.nih.gov/gene/23054
UCP1	6	0.0023552	0.011609	0.927682	245	6	1.6345	6	https://www.ncbi.nlm.nih.gov/gene/7350
KRBOX1	6	0.0023607	0.01163	0.927682	246	3	0.036633	3	https://www.ncbi.nlm.nih.gov/gene/100506243
hsa-mir-4254	4	0.0023609	0.0085246	0.927682	247	4	1.386	4	NA
SH3TC1	6	0.0023668	0.011656	0.927682	248	2	-2.1745	2	https://www.ncbi.nlm.nih.gov/gene/54436
MRPS2	6	0.0023869	0.011747	0.927682	249	3	-0.36011	3	https://www.ncbi.nlm.nih.gov/gene/51116
SLC9A6	6	0.0023875	0.011749	0.927682	250	5	1.3421	5	https://www.ncbi.nlm.nih.gov/gene/10479
RNF223	6	0.0023935	0.011778	0.927682	251	5	1.5612	5	https://www.ncbi.nlm.nih.gov/gene/401934
DBH	6	0.0024102	0.011858	0.927682	252	2	-0.2079	2	https://www.ncbi.nlm.nih.gov/gene/1621
NDUFA3	6	0.0024273	0.011945	0.927682	253	3	0.94853	3	https://www.ncbi.nlm.nih.gov/gene/4696
ZNRF2	6	0.0024311	0.011965	0.927682	254	4	1.6973	4	https://www.ncbi.nlm.nih.gov/gene/223082
LCN8	6	0.002432	0.011967	0.927682	255	2	-0.10215	2	https://www.ncbi.nlm.nih.gov/gene/138307
ABCA4	6	0.0024336	0.011975	0.927682	256	6	1.1828	6	https://www.ncbi.nlm.nih.gov/gene/24
ACSL5	6	0.0024492	0.012058	0.927682	257	3	0.40912	3	https://www.ncbi.nlm.nih.gov/gene/51703
GJD4	6	0.0024555	0.012088	0.927682	258	5	1.2618	5	https://www.ncbi.nlm.nih.gov/gene/219770
RAB1B	6	0.0024618	0.012116	0.927682	259	4	2.0668	4	https://www.ncbi.nlm.nih.gov/gene/81876
GATC	6	0.0024618	0.012116	0.927682	260	3	1.1304	3	https://www.ncbi.nlm.nih.gov/gene/283459
MOGAT3	6	0.0024629	0.012123	0.927682	261	6	1.3252	6	https://www.ncbi.nlm.nih.gov/gene/346606
AQP4	6	0.0024823	0.012213	0.927682	262	4	0.98816	4	https://www.ncbi.nlm.nih.gov/gene/361
RAB5C	6	0.0024939	0.012265	0.927682	263	6	1.3588	6	https://www.ncbi.nlm.nih.gov/gene/5878
FDX1L	6	0.0025131	0.012356	0.927682	264	3	-0.0038745	3	https://www.ncbi.nlm.nih.gov/gene/112812
CC2D2A	6	0.0025131	0.012356	0.927682	265	4	0.76437	4	https://www.ncbi.nlm.nih.gov/gene/57545
GAMT	6	0.0025131	0.012356	0.927682	266	3	0.77196	3	https://www.ncbi.nlm.nih.gov/gene/2593
NEK5	6	0.0025131	0.012356	0.927682	267	3	-0.44027	3	https://www.ncbi.nlm.nih.gov/gene/341676
MAGED1	6	0.0025131	0.012356	0.927682	268	2	-0.22527	2	https://www.ncbi.nlm.nih.gov/gene/9500
BMP1	6	0.0025189	0.012386	0.927682	269	5	1.6746	5	https://www.ncbi.nlm.nih.gov/gene/649
IL4	6	0.0025634	0.012599	0.927682	270	3	0.021721	3	https://www.ncbi.nlm.nih.gov/gene/3565
POLR1D	6	0.0025778	0.012666	0.927682	271	4	1.4869	4	https://www.ncbi.nlm.nih.gov/gene/51082
NUDT19	6	0.0025897	0.01272	0.927682	272	3	0.44517	3	https://www.ncbi.nlm.nih.gov/gene/390916
TREH	5	0.0026305	0.011367	0.927682	273	4	1.5856	4	https://www.ncbi.nlm.nih.gov/gene/11181
KRTAP20-2	6	0.002633	0.012923	0.927682	274	6	0.96651	6	https://www.ncbi.nlm.nih.gov/gene/337976
PVALB	6	0.0026539	0.013018	0.927682	275	4	1.7893	4	https://www.ncbi.nlm.nih.gov/gene/5816
MAP3K8	6	0.0026549	0.013022	0.927682	276	5	1.5722	5	https://www.ncbi.nlm.nih.gov/gene/1326
ZFAND3	6	0.002659	0.013041	0.927682	277	4	1.726	4	https://www.ncbi.nlm.nih.gov/gene/60685
PPAN	6	0.0026683	0.013082	0.927682	278	6	1.0461	6	https://www.ncbi.nlm.nih.gov/gene/56342
SLC29A1	6	0.0026708	0.013094	0.927682	279	4	1.5979	4	https://www.ncbi.nlm.nih.gov/gene/2030
BUB3	6	0.0026747	0.013115	0.927682	280	5	1.7351	5	https://www.ncbi.nlm.nih.gov/gene/9184
RPA3	6	0.0026751	0.013118	0.927682	281	3	0.24764	3	https://www.ncbi.nlm.nih.gov/gene/6119
RAB11FIP4	6	0.002716	0.01331	0.927682	282	5	1.1021	5	https://www.ncbi.nlm.nih.gov/gene/84440
AMDHD1	6	0.0027509	0.013472	0.927682	283	4	1.2817	4	https://www.ncbi.nlm.nih.gov/gene/144193
FDPS	6	0.0027667	0.01354	0.927682	284	3	0.51331	3	https://www.ncbi.nlm.nih.gov/gene/2224
MAPK1IP1L	6	0.0027948	0.013681	0.927682	285	5	1.2584	5	https://www.ncbi.nlm.nih.gov/gene/93487
hsa-mir-4282	4	0.0028026	0.01005	0.927682	286	4	1.8422	4	NA
CNTNAP5	6	0.00281	0.01376	0.927682	287	5	1.7704	5	https://www.ncbi.nlm.nih.gov/gene/129684
BRD8	5	0.002833	0.012179	0.927682	288	4	2.2249	4	https://www.ncbi.nlm.nih.gov/gene/10902
ARMCX1	6	0.00284	0.013898	0.927682	289	5	1.0982	5	https://www.ncbi.nlm.nih.gov/gene/51309
TP53I13	6	0.0028427	0.013908	0.927682	290	2	-0.98279	2	https://www.ncbi.nlm.nih.gov/gene/90313
PIM3	6	0.0028427	0.013908	0.927682	291	4	1.1975	4	https://www.ncbi.nlm.nih.gov/gene/415116
KLK5	6	0.0028429	0.013908	0.927682	292	4	1.7264	4	https://www.ncbi.nlm.nih.gov/gene/25818
PTGER3	6	0.0028448	0.013914	0.927682	293	5	1.2457	5	https://www.ncbi.nlm.nih.gov/gene/5733
FAM81A	6	0.0028512	0.013942	0.927682	294	3	0.40621	3	https://www.ncbi.nlm.nih.gov/gene/145773
C9orf153	6	0.0028581	0.013967	0.927682	295	5	1.8115	5	https://www.ncbi.nlm.nih.gov/gene/389766
LOC100144595	6	0.0028676	0.014014	0.927682	296	5	1.0063	5	https://www.ncbi.nlm.nih.gov/gene/100144595
CDH26	6	0.0028737	0.014037	0.927682	297	5	1.194	5	https://www.ncbi.nlm.nih.gov/gene/60437
APITD1	6	0.0029113	0.014205	0.927682	298	6	1.2626	6	https://www.ncbi.nlm.nih.gov/gene/378708
SHROOM3	6	0.0029135	0.014214	0.927682	299	5	1.6882	5	https://www.ncbi.nlm.nih.gov/gene/57619
OTOA	6	0.0029154	0.014222	0.927682	300	4	1.707	4	https://www.ncbi.nlm.nih.gov/gene/146183
CCKBR	6	0.0029166	0.014232	0.927682	301	3	1.0474	3	https://www.ncbi.nlm.nih.gov/gene/887
NT5C	6	0.0029174	0.014234	0.927682	302	4	0.98217	4	https://www.ncbi.nlm.nih.gov/gene/30833
PAFAH1B3	6	0.0029188	0.014238	0.927682	303	3	-1.5631	3	https://www.ncbi.nlm.nih.gov/gene/5050
PDS5A	6	0.0029234	0.014254	0.927682	304	5	1.7531	5	https://www.ncbi.nlm.nih.gov/gene/23244
TRAPPC1	6	0.0029296	0.014284	0.927682	305	3	0.87549	3	https://www.ncbi.nlm.nih.gov/gene/58485
PSCA	6	0.00294	0.014339	0.927682	306	4	1.6719	4	https://www.ncbi.nlm.nih.gov/gene/8000
LIG1	6	0.0029626	0.014437	0.927682	307	5	1.4581	5	https://www.ncbi.nlm.nih.gov/gene/3978
EBF2	6	0.0029644	0.014446	0.927682	308	5	1.6946	5	https://www.ncbi.nlm.nih.gov/gene/64641
ITPKA	6	0.0029654	0.014451	0.927682	309	4	1.4885	4	https://www.ncbi.nlm.nih.gov/gene/3706
PDCD1	6	0.0029695	0.014474	0.927682	310	3	0.46004	3	https://www.ncbi.nlm.nih.gov/gene/5133
GANC	6	0.002976	0.014504	0.927682	311	5	1.2791	5	https://www.ncbi.nlm.nih.gov/gene/2595
SLC30A1	6	0.0029789	0.014517	0.927682	312	4	1.579	4	https://www.ncbi.nlm.nih.gov/gene/7779
hsa-mir-6744	4	0.0029824	0.010678	0.927682	313	4	1.5701	4	https://www.ncbi.nlm.nih.gov/gene/102466725
ARMC6	6	0.0030014	0.014621	0.927682	314	6	1.1372	6	https://www.ncbi.nlm.nih.gov/gene/93436
C1QL4	6	0.0030202	0.01471	0.927682	315	4	0.67106	4	https://www.ncbi.nlm.nih.gov/gene/338761
VPS37D	6	0.0030217	0.014718	0.927682	316	5	1.4937	5	https://www.ncbi.nlm.nih.gov/gene/155382
MRPL40	5	0.0030246	0.012942	0.927682	317	1	-3.3699	1	https://www.ncbi.nlm.nih.gov/gene/64976
MANEAL	6	0.0030292	0.014752	0.927682	318	2	-0.23025	2	https://www.ncbi.nlm.nih.gov/gene/149175
ZNF746	6	0.0030479	0.014841	0.927682	319	5	1.6516	5	https://www.ncbi.nlm.nih.gov/gene/155061
SMO	6	0.0030513	0.014861	0.927682	320	6	1.1115	6	https://www.ncbi.nlm.nih.gov/gene/6608
ZNF593	6	0.0030684	0.014936	0.927682	321	3	1.3562	3	https://www.ncbi.nlm.nih.gov/gene/51042
SAMD10	6	0.0030764	0.014971	0.927682	322	4	1.6253	4	https://www.ncbi.nlm.nih.gov/gene/140700
OPRL1	6	0.0031369	0.015231	0.927682	323	4	1.4497	4	https://www.ncbi.nlm.nih.gov/gene/4987
TRIM16	6	0.0031413	0.015254	0.927682	324	4	1.7738	4	https://www.ncbi.nlm.nih.gov/gene/10626
ULK2	6	0.0031469	0.015282	0.927682	325	5	0.88774	5	https://www.ncbi.nlm.nih.gov/gene/9706
VOPP1	6	0.0031469	0.015282	0.927682	326	4	1.4222	4	https://www.ncbi.nlm.nih.gov/gene/81552
SLC2A13	6	0.0031469	0.015282	0.927682	327	3	0.73994	3	https://www.ncbi.nlm.nih.gov/gene/114134
LOC728392	6	0.0031702	0.015386	0.927682	328	5	1.6805	5	https://www.ncbi.nlm.nih.gov/gene/728392
KIAA1737	6	0.003184	0.015439	0.927682	329	6	1.3668	6	https://www.ncbi.nlm.nih.gov/gene/85457
STOML1	6	0.0031874	0.015451	0.927682	330	4	1.0923	4	https://www.ncbi.nlm.nih.gov/gene/9399
hsa-mir-4330	4	0.0032115	0.011485	0.927682	331	3	2.2595	3	NA
hsa-mir-6814	4	0.0032215	0.011518	0.927682	332	3	1.9771	3	https://www.ncbi.nlm.nih.gov/gene/102465488
ATP13A4	6	0.0032476	0.015716	0.927682	333	5	1.1431	5	https://www.ncbi.nlm.nih.gov/gene/84239
hsa-mir-4788	4	0.003259	0.011652	0.927682	334	2	1.134	2	NA
GRIN1	6	0.0032723	0.015823	0.927682	335	6	1.4428	6	https://www.ncbi.nlm.nih.gov/gene/2902
ATF4	6	0.0032736	0.015828	0.927682	336	1	-2.2218	1	https://www.ncbi.nlm.nih.gov/gene/468
hsa-mir-6776	4	0.0032779	0.011715	0.927682	337	3	1.7858	3	https://www.ncbi.nlm.nih.gov/gene/102465465
ETV2	6	0.0032815	0.015861	0.927682	338	4	1.8067	4	https://www.ncbi.nlm.nih.gov/gene/2116
ABCG1	6	0.0032968	0.01593	0.927682	339	6	1.3743	6	https://www.ncbi.nlm.nih.gov/gene/9619
NonTargetingControlGuideForHuman_0792	1	0.0032993	0.0032505	0.927682	340	1	3.8245	1	NA
hsa-mir-191	4	0.0032994	0.011786	0.927682	341	2	0.67602	2	NA
AGMAT	6	0.0033061	0.015964	0.927682	342	5	1.5448	5	https://www.ncbi.nlm.nih.gov/gene/79814
CSDC2	6	0.0033105	0.015986	0.927682	343	3	1.0601	3	https://www.ncbi.nlm.nih.gov/gene/27254
PELI1	6	0.0033185	0.016024	0.927682	344	5	1.5386	5	https://www.ncbi.nlm.nih.gov/gene/57162
HOXD3	6	0.0033243	0.016051	0.927682	345	3	-0.32918	3	https://www.ncbi.nlm.nih.gov/gene/3232
ITPR1	6	0.0033383	0.016119	0.927682	346	4	1.6159	4	https://www.ncbi.nlm.nih.gov/gene/3708
ASH2L	6	0.0033416	0.016142	0.927682	347	4	1.4719	4	https://www.ncbi.nlm.nih.gov/gene/9070
GLTSCR1	5	0.0033608	0.014282	0.927682	348	4	1.9489	4	https://www.ncbi.nlm.nih.gov/gene/29998
BTBD17	6	0.003375	0.016293	0.927682	349	3	0.91115	3	https://www.ncbi.nlm.nih.gov/gene/388419
PRELID1	6	0.0033934	0.016375	0.927682	350	3	0.69675	3	https://www.ncbi.nlm.nih.gov/gene/27166
METTL22	6	0.0033964	0.016388	0.927682	351	6	1.0415	6	https://www.ncbi.nlm.nih.gov/gene/79091
FAM175A	6	0.0034007	0.016411	0.927682	352	2	0.247	2	https://www.ncbi.nlm.nih.gov/gene/84142
EIF2S1	5	0.0034048	0.014472	0.927682	353	2	-3.061	2	https://www.ncbi.nlm.nih.gov/gene/1965
hsa-mir-92b	4	0.0034346	0.012272	0.927682	354	2	0.24944	2	https://www.ncbi.nlm.nih.gov/gene/693235
WFDC11	6	0.003451	0.016652	0.927682	355	3	0.42276	3	https://www.ncbi.nlm.nih.gov/gene/259239
KIAA1024L	6	0.003451	0.016652	0.927682	356	2	-0.22774	2	https://www.ncbi.nlm.nih.gov/gene/100127206
hsa-mir-3616	4	0.0034592	0.012367	0.927682	357	3	1.823	3	NA
GSDMD	6	0.0034597	0.01669	0.927682	358	4	1.536	4	https://www.ncbi.nlm.nih.gov/gene/79792
BSX	6	0.0034618	0.016698	0.927682	359	3	1.2395	3	https://www.ncbi.nlm.nih.gov/gene/390259
hsa-mir-6769a	4	0.0034758	0.012419	0.927682	360	3	1.874	3	https://www.ncbi.nlm.nih.gov/gene/102466731
PKP3	6	0.0034821	0.016793	0.927682	361	6	1.2117	6	https://www.ncbi.nlm.nih.gov/gene/11187
RYBP	6	0.0034838	0.016801	0.927682	362	3	0.47619	3	https://www.ncbi.nlm.nih.gov/gene/23429
ANKRD45	6	0.003517	0.01695	0.927682	363	6	1.4671	6	https://www.ncbi.nlm.nih.gov/gene/339416
BMP7	6	0.0035192	0.016958	0.927682	364	4	1.052	4	https://www.ncbi.nlm.nih.gov/gene/655
CCDC179	6	0.0035243	0.016982	0.927682	365	5	1.3957	5	https://www.ncbi.nlm.nih.gov/gene/100500938
ARSK	6	0.003527	0.016998	0.927682	366	1	-0.11161	1	https://www.ncbi.nlm.nih.gov/gene/153642
CHRD	6	0.0035275	0.017	0.927682	367	6	0.82819	6	https://www.ncbi.nlm.nih.gov/gene/8646
WDR17	6	0.003536	0.017042	0.927682	368	6	1.5561	6	https://www.ncbi.nlm.nih.gov/gene/116966
WDR53	6	0.0035529	0.017127	0.927682	369	6	0.89962	6	https://www.ncbi.nlm.nih.gov/gene/348793
hsa-mir-3945	4	0.003618	0.01292	0.927682	370	3	1.8077	3	NA
HEBP1	6	0.0036284	0.017486	0.927682	371	3	0.29081	3	https://www.ncbi.nlm.nih.gov/gene/50865
ARL9	6	0.0036284	0.017486	0.927682	372	3	-0.98202	3	https://www.ncbi.nlm.nih.gov/gene/132946
NUDT2	6	0.0036361	0.017523	0.927682	373	5	1.2066	5	https://www.ncbi.nlm.nih.gov/gene/318
DLX6	6	0.0036869	0.017731	0.927682	374	5	1.5372	5	https://www.ncbi.nlm.nih.gov/gene/1750
PRTG	5	0.0036985	0.015619	0.927682	375	4	1.7708	4	https://www.ncbi.nlm.nih.gov/gene/283659
PVRIG	6	0.0036986	0.017781	0.927682	376	3	0.15453	3	https://www.ncbi.nlm.nih.gov/gene/79037
CDT1	5	0.0037004	0.015625	0.927682	377	4	1.8622	4	https://www.ncbi.nlm.nih.gov/gene/81620
PLEKHG3	5	0.0037004	0.015625	0.927682	378	1	-0.38596	1	https://www.ncbi.nlm.nih.gov/gene/26030
ANKRD66	6	0.0037018	0.017791	0.927682	379	4	1.5715	4	https://www.ncbi.nlm.nih.gov/gene/100287718
RBM18	6	0.0037297	0.017894	0.927682	380	4	1.2647	4	https://www.ncbi.nlm.nih.gov/gene/92400
B3GALTL	6	0.0037327	0.017906	0.927682	381	4	1.664	4	https://www.ncbi.nlm.nih.gov/gene/145173
SDC1	5	0.0037385	0.01577	0.927682	382	5	1.5138	5	https://www.ncbi.nlm.nih.gov/gene/6382
LCE4A	5	0.0037411	0.015778	0.927682	383	5	1.1982	5	https://www.ncbi.nlm.nih.gov/gene/199834
LPHN2	5	0.0037516	0.015821	0.927682	384	2	0.16435	2	https://www.ncbi.nlm.nih.gov/gene/23266
AOC2	6	0.0037524	0.01797	0.927682	385	4	1.7417	4	https://www.ncbi.nlm.nih.gov/gene/314
UROC1	6	0.0037585	0.017994	0.927682	386	4	1.8751	4	https://www.ncbi.nlm.nih.gov/gene/131669
RAET1G	6	0.0037622	0.018008	0.927682	387	5	1.2415	5	https://www.ncbi.nlm.nih.gov/gene/353091
PSMC2	6	0.0037696	0.018047	0.927682	388	2	-1.4332	2	https://www.ncbi.nlm.nih.gov/gene/5701
TSHZ2	6	0.0037737	0.018065	0.927682	389	4	1.1758	4	https://www.ncbi.nlm.nih.gov/gene/128553
ULBP3	6	0.0037804	0.018089	0.927682	390	4	0.97333	4	https://www.ncbi.nlm.nih.gov/gene/79465
ZNF586	6	0.0037812	0.01809	0.927682	391	2	-0.7102	2	https://www.ncbi.nlm.nih.gov/gene/54807
CCDC58	6	0.0038024	0.018167	0.927682	392	3	0.15723	3	https://www.ncbi.nlm.nih.gov/gene/131076
TNFRSF19	6	0.0038048	0.018175	0.927682	393	5	1.5716	5	https://www.ncbi.nlm.nih.gov/gene/55504
TMED1	6	0.003831	0.01828	0.927682	394	2	-1.0622	2	https://www.ncbi.nlm.nih.gov/gene/11018
TMEM52B	6	0.003906	0.018557	0.927682	395	4	1.4677	4	https://www.ncbi.nlm.nih.gov/gene/120939
hsa-mir-3132	4	0.0039105	0.013916	0.927682	396	4	1.6793	4	NA
LIPC	6	0.0039253	0.018625	0.927682	397	3	0.58351	3	https://www.ncbi.nlm.nih.gov/gene/3990
WNT6	6	0.0039324	0.018652	0.927682	398	3	1.1448	3	https://www.ncbi.nlm.nih.gov/gene/7475
HOXA9	6	0.0039381	0.018674	0.927682	399	5	1.1304	5	https://www.ncbi.nlm.nih.gov/gene/3205
hsa-mir-422a	4	0.0039414	0.014018	0.927682	400	1	-0.053463	1	NA
C10orf128	6	0.0040419	0.019024	0.927682	401	4	1.5747	4	https://www.ncbi.nlm.nih.gov/gene/170371
DESI1	6	0.0040441	0.019031	0.927682	402	2	0.13185	2	https://www.ncbi.nlm.nih.gov/gene/27351
FAM229B	6	0.0040543	0.019067	0.927682	403	4	1.3326	4	https://www.ncbi.nlm.nih.gov/gene/619208
PURB	6	0.0040843	0.019179	0.927682	404	4	0.85611	4	https://www.ncbi.nlm.nih.gov/gene/5814
CRADD	6	0.0040843	0.019179	0.927682	405	2	-0.25826	2	https://www.ncbi.nlm.nih.gov/gene/8738
RPL9	6	0.0040843	0.019179	0.927682	406	2	-0.14555	2	https://www.ncbi.nlm.nih.gov/gene/6133
LAMA4	6	0.0040955	0.019222	0.927682	407	4	1.3646	4	https://www.ncbi.nlm.nih.gov/gene/3910
ATP5S	6	0.0041077	0.019267	0.927682	408	5	1.4544	5	https://www.ncbi.nlm.nih.gov/gene/27109
SUV420H2	6	0.0041078	0.019267	0.927682	409	5	1.1785	5	https://www.ncbi.nlm.nih.gov/gene/84787
RPL23	6	0.0041082	0.019268	0.927682	410	3	1.0097	3	https://www.ncbi.nlm.nih.gov/gene/9349
ZNF304	6	0.0041125	0.019281	0.927682	411	5	1.446	5	https://www.ncbi.nlm.nih.gov/gene/57343
DNMBP	6	0.0041202	0.019311	0.927682	412	2	-3.2899	2	https://www.ncbi.nlm.nih.gov/gene/23268
NAGK	6	0.0041322	0.019353	0.927682	413	4	1.6419	4	https://www.ncbi.nlm.nih.gov/gene/55577
PTPN23	6	0.0041599	0.019459	0.927682	414	5	1.8781	5	https://www.ncbi.nlm.nih.gov/gene/25930
NEXN	6	0.0041687	0.019496	0.927682	415	4	0.83374	4	https://www.ncbi.nlm.nih.gov/gene/91624
UBXN7	6	0.0041828	0.019542	0.927682	416	2	-0.44342	2	https://www.ncbi.nlm.nih.gov/gene/26043
C16orf72	6	0.0041966	0.019591	0.927682	417	5	1.2642	5	https://www.ncbi.nlm.nih.gov/gene/29035
hsa-mir-7155	4	0.0042245	0.014967	0.927682	418	3	2.0621	3	https://www.ncbi.nlm.nih.gov/gene/102466815
PATL1	6	0.0042374	0.019735	0.927682	419	5	1.3955	5	https://www.ncbi.nlm.nih.gov/gene/219988
TMEM233	6	0.0042455	0.019764	0.927682	420	4	1.4735	4	https://www.ncbi.nlm.nih.gov/gene/387890
ARRB2	6	0.0042555	0.019802	0.927682	421	5	1.7075	5	https://www.ncbi.nlm.nih.gov/gene/409
MRI1	6	0.0042683	0.019856	0.927682	422	2	-0.85285	2	https://www.ncbi.nlm.nih.gov/gene/84245
SASH3	6	0.0043031	0.019986	0.927682	423	5	1.1209	5	https://www.ncbi.nlm.nih.gov/gene/54440
OR51A4	6	0.0043032	0.019986	0.927682	424	3	0.74637	3	https://www.ncbi.nlm.nih.gov/gene/401666
THSD4	6	0.0043284	0.020079	0.927682	425	5	1.1287	5	https://www.ncbi.nlm.nih.gov/gene/79875
NBPF3	6	0.0043333	0.020094	0.927682	426	5	1.5081	5	https://www.ncbi.nlm.nih.gov/gene/84224
NBPF9	5	0.004359	0.018273	0.927682	427	5	1.2335	5	https://www.ncbi.nlm.nih.gov/gene/400818
CMTM3	6	0.0043917	0.020306	0.927682	428	5	1.5445	5	https://www.ncbi.nlm.nih.gov/gene/123920
BCS1L	6	0.0043946	0.020315	0.927682	429	4	1.2778	4	https://www.ncbi.nlm.nih.gov/gene/617
HIST2H3D	6	0.0044068	0.020356	0.927682	430	4	1.6918	4	https://www.ncbi.nlm.nih.gov/gene/653604
LMTK3	6	0.0044068	0.020356	0.927682	431	4	1.3852	4	https://www.ncbi.nlm.nih.gov/gene/114783
PELI2	6	0.004425	0.020414	0.927682	432	4	1.633	4	https://www.ncbi.nlm.nih.gov/gene/57161
OR4C45	6	0.0044388	0.020467	0.927682	433	2	-2.296	2	https://www.ncbi.nlm.nih.gov/gene/403257
OSBPL8	6	0.0044388	0.020467	0.927682	434	2	-1.7542	2	https://www.ncbi.nlm.nih.gov/gene/114882
OR51S1	6	0.0044388	0.020467	0.927682	435	4	0.57212	4	https://www.ncbi.nlm.nih.gov/gene/119692
TOP1MT	6	0.0044439	0.020485	0.927682	436	3	0.52438	3	https://www.ncbi.nlm.nih.gov/gene/116447
FAM98C	6	0.0044493	0.020507	0.927682	437	3	1.0584	3	https://www.ncbi.nlm.nih.gov/gene/147965
SLC6A19	6	0.0044493	0.020507	0.927682	438	3	0.75796	3	https://www.ncbi.nlm.nih.gov/gene/340024
hsa-mir-4448	4	0.0044898	0.015883	0.927682	439	3	1.7759	3	NA
BCL7C	6	0.0045162	0.020745	0.927682	440	4	1.5453	4	https://www.ncbi.nlm.nih.gov/gene/9274
FAM120C	6	0.0045239	0.020776	0.927682	441	5	1.5454	5	https://www.ncbi.nlm.nih.gov/gene/54954
COMMD10	6	0.004534	0.020816	0.927682	442	2	-0.69474	2	https://www.ncbi.nlm.nih.gov/gene/51397
TRAPPC5	6	0.004543	0.020852	0.927682	443	4	1.4956	4	https://www.ncbi.nlm.nih.gov/gene/126003
PPAPDC2	6	0.0045471	0.020867	0.927682	444	5	1.6164	5	https://www.ncbi.nlm.nih.gov/gene/403313
TANGO6	6	0.00456	0.020911	0.927682	445	5	1.6306	5	https://www.ncbi.nlm.nih.gov/gene/79613
CNOT10	6	0.0045641	0.020928	0.927682	446	4	1.9618	4	https://www.ncbi.nlm.nih.gov/gene/25904
SOCS6	6	0.0045651	0.020932	0.927682	447	4	1.5165	4	https://www.ncbi.nlm.nih.gov/gene/9306
TMEM220	6	0.0045719	0.020961	0.927682	448	5	1.4747	5	https://www.ncbi.nlm.nih.gov/gene/388335
hsa-mir-190b	4	0.0045785	0.016198	0.927682	449	4	1.6426	4	NA
TNP1	6	0.004608	0.021088	0.927682	450	2	-2.014	2	https://www.ncbi.nlm.nih.gov/gene/7141
SMC3	6	0.0046081	0.021089	0.927682	451	4	1.4916	4	https://www.ncbi.nlm.nih.gov/gene/9126
NID2	6	0.0046134	0.021111	0.927682	452	4	1.5676	4	https://www.ncbi.nlm.nih.gov/gene/22795
CTNS	6	0.0046153	0.021114	0.927682	453	5	1.1786	5	https://www.ncbi.nlm.nih.gov/gene/1497
FOXA3	6	0.0046323	0.021183	0.927682	454	3	0.9416	3	https://www.ncbi.nlm.nih.gov/gene/3171
GDPD1	6	0.0046566	0.021269	0.927682	455	4	1.262	4	https://www.ncbi.nlm.nih.gov/gene/284161
SLC23A3	6	0.0046607	0.021282	0.927682	456	5	1.318	5	https://www.ncbi.nlm.nih.gov/gene/151295
hsa-mir-15a	4	0.0046676	0.0165	0.927682	457	2	0.54801	2	https://www.ncbi.nlm.nih.gov/gene/406948
CTAGE6	4	0.0046676	0.0165	0.927682	458	2	0.78073	2	https://www.ncbi.nlm.nih.gov/gene/340307
ADAMTS7	6	0.0046783	0.021336	0.927682	459	3	-0.56399	3	https://www.ncbi.nlm.nih.gov/gene/11173
NCOA7	6	0.0046932	0.021389	0.927682	460	3	0.67073	3	https://www.ncbi.nlm.nih.gov/gene/135112
SKAP1	6	0.0046932	0.021389	0.927682	461	2	0.20254	2	https://www.ncbi.nlm.nih.gov/gene/8631
FIGLA	6	0.0046958	0.021401	0.927682	462	5	1.6669	5	https://www.ncbi.nlm.nih.gov/gene/344018
CHRNA3	5	0.0046984	0.019628	0.927682	463	4	1.5256	4	https://www.ncbi.nlm.nih.gov/gene/1136
APITD1-CORT	2	0.0047011	0.0090259	0.927682	464	2	2.4196	2	https://www.ncbi.nlm.nih.gov/gene/100526739
UBE2A	6	0.0047038	0.021432	0.927682	465	5	1.4396	5	https://www.ncbi.nlm.nih.gov/gene/7319
OR6F1	6	0.0047079	0.021451	0.927682	466	4	1.8042	4	https://www.ncbi.nlm.nih.gov/gene/343169
C20orf111	4	0.0047377	0.016752	0.927682	467	3	1.6408	3	https://www.ncbi.nlm.nih.gov/gene/51526
POLRMT	6	0.0047426	0.021578	0.927682	468	2	-0.49769	2	https://www.ncbi.nlm.nih.gov/gene/5442
SCNM1	6	0.0047426	0.021578	0.927682	469	3	0.0069094	3	https://www.ncbi.nlm.nih.gov/gene/79005
NTNG1	6	0.0047426	0.021578	0.927682	470	4	1.1815	4	https://www.ncbi.nlm.nih.gov/gene/22854
ARMC1	6	0.0047426	0.021578	0.927682	471	3	0.59025	3	https://www.ncbi.nlm.nih.gov/gene/55156
BSN	6	0.0047426	0.021578	0.927682	472	2	0.3955	2	https://www.ncbi.nlm.nih.gov/gene/8927
BCL2L12	6	0.0047598	0.021636	0.927682	473	2	0.28821	2	https://www.ncbi.nlm.nih.gov/gene/83596
KRTAP6-2	6	0.0047631	0.021644	0.927682	474	5	1.4181	5	https://www.ncbi.nlm.nih.gov/gene/337967
RSPH4A	6	0.0047658	0.021655	0.927682	475	5	1.4395	5	https://www.ncbi.nlm.nih.gov/gene/345895
RBM19	6	0.0047678	0.021662	0.927682	476	4	1.2422	4	https://www.ncbi.nlm.nih.gov/gene/9904
TRA2B	6	0.0047695	0.021669	0.927682	477	4	1.8189	4	https://www.ncbi.nlm.nih.gov/gene/6434
CAPN15	5	0.0047792	0.01994	0.927682	478	5	1.3876	5	https://www.ncbi.nlm.nih.gov/gene/6650
CALCOCO2	6	0.0047814	0.02171	0.927682	479	3	0.39756	3	https://www.ncbi.nlm.nih.gov/gene/10241
LIMS3	5	0.0047842	0.019959	0.927682	480	5	0.60362	5	https://www.ncbi.nlm.nih.gov/gene/96626
TMEM95	6	0.0048342	0.021909	0.932508	481	5	1.1981	5	https://www.ncbi.nlm.nih.gov/gene/339168
PRDM6	5	0.0048611	0.020269	0.927682	482	2	-0.30138	2	https://www.ncbi.nlm.nih.gov/gene/93166
KIF3A	6	0.0048652	0.022012	0.933075	483	4	1.7741	4	https://www.ncbi.nlm.nih.gov/gene/11127
TSHZ3	6	0.0048944	0.022111	0.933075	484	4	1.1638	4	https://www.ncbi.nlm.nih.gov/gene/57616
hsa-mir-4674	4	0.0049043	0.017332	0.927682	485	3	1.6692	3	NA
THAP11	6	0.0049139	0.02217	0.933075	486	4	1.3254	4	https://www.ncbi.nlm.nih.gov/gene/57215
AUP1	6	0.0049139	0.02217	0.933075	487	5	1.4464	5	https://www.ncbi.nlm.nih.gov/gene/550
hsa-mir-1237	4	0.0049224	0.017395	0.927682	488	2	0.49504	2	https://www.ncbi.nlm.nih.gov/gene/100302280
AADAC	6	0.004942	0.022284	0.933075	489	5	1.3185	5	https://www.ncbi.nlm.nih.gov/gene/13
CHCHD7	6	0.0049666	0.022374	0.933075	490	4	1.1913	4	https://www.ncbi.nlm.nih.gov/gene/79145
SLC2A6	6	0.0049732	0.022404	0.933075	491	2	-2.8211	2	https://www.ncbi.nlm.nih.gov/gene/11182
LIMS1	6	0.0049798	0.022424	0.933075	492	3	0.83124	3	https://www.ncbi.nlm.nih.gov/gene/3987
LRRN4	6	0.0049847	0.022439	0.933075	493	4	1.4784	4	https://www.ncbi.nlm.nih.gov/gene/164312
hsa-mir-655	4	0.0049912	0.017606	0.927682	494	2	0.20874	2	https://www.ncbi.nlm.nih.gov/gene/724025
KIAA0247	6	0.0049957	0.02248	0.933075	495	3	0.98314	3	https://www.ncbi.nlm.nih.gov/gene/9766
GH1	6	0.0050173	0.022554	0.933075	496	4	1.1843	4	https://www.ncbi.nlm.nih.gov/gene/2688
IL9	6	0.0050252	0.02258	0.933075	497	3	1.3053	3	https://www.ncbi.nlm.nih.gov/gene/3578
ANKRD18B	6	0.0050504	0.022663	0.933075	498	3	0.72805	3	https://www.ncbi.nlm.nih.gov/gene/441459
TMCO3	6	0.0050544	0.022678	0.933075	499	4	1.3423	4	https://www.ncbi.nlm.nih.gov/gene/55002
PRPH2	6	0.0050716	0.022739	0.933075	500	3	0.32437	3	https://www.ncbi.nlm.nih.gov/gene/5961
PDCD5	6	0.0050716	0.022739	0.933075	501	1	-0.091311	1	https://www.ncbi.nlm.nih.gov/gene/9141
PRR12	6	0.0050819	0.022773	0.933075	502	5	1.6342	5	https://www.ncbi.nlm.nih.gov/gene/57479
PPIL3	6	0.0050837	0.022782	0.933075	503	3	0.89655	3	https://www.ncbi.nlm.nih.gov/gene/53938
NonTargetingControlGuideForHuman_0263	1	0.0050866	0.0050134	0.927682	504	1	3.6116	1	NA
PYGL	5	0.0050917	0.021183	0.927682	505	3	1.3142	3	https://www.ncbi.nlm.nih.gov/gene/5836
CDK3	6	0.0051039	0.022841	0.933723	506	5	1.4014	4	https://www.ncbi.nlm.nih.gov/gene/1018
VPS41	6	0.0051418	0.022994	0.938203	507	5	1.4954	5	https://www.ncbi.nlm.nih.gov/gene/27072
RIOK1	5	0.0051533	0.021431	0.927682	508	3	1.9963	3	https://www.ncbi.nlm.nih.gov/gene/83732
FEV	6	0.0051631	0.023068	0.939452	509	5	1.4112	5	https://www.ncbi.nlm.nih.gov/gene/54738
CCL24	6	0.0051981	0.023208	0.943403	510	2	-0.25758	2	https://www.ncbi.nlm.nih.gov/gene/6369
hsa-mir-4729	4	0.0052118	0.01835	0.927682	511	2	1.05	2	NA
CHRNG	6	0.005245	0.023378	0.94513	512	2	0.27556	2	https://www.ncbi.nlm.nih.gov/gene/1146
STMN3	6	0.0052485	0.023391	0.94513	513	5	1.3145	5	https://www.ncbi.nlm.nih.gov/gene/50861
BOLL	6	0.0052487	0.023392	0.94513	514	1	-0.36083	1	https://www.ncbi.nlm.nih.gov/gene/66037
ADCY1	6	0.0052993	0.023583	0.947992	515	5	0.87858	5	https://www.ncbi.nlm.nih.gov/gene/107
TIGD6	6	0.0053356	0.023701	0.949142	516	3	0.59329	3	https://www.ncbi.nlm.nih.gov/gene/81789
NPIPA5	3	0.0053396	0.01469	0.927682	517	1	0.27667	1	https://www.ncbi.nlm.nih.gov/gene/100288332
ZNF57	6	0.0053563	0.023774	0.949142	518	4	1.2352	4	https://www.ncbi.nlm.nih.gov/gene/126295
LETMD1	6	0.0053752	0.02383	0.949142	519	2	-0.070014	2	https://www.ncbi.nlm.nih.gov/gene/25875
NAALAD2	6	0.0053752	0.02383	0.949142	520	3	0.72623	3	https://www.ncbi.nlm.nih.gov/gene/10003
DPY19L1	5	0.0054159	0.022448	0.933075	521	5	1.0954	5	https://www.ncbi.nlm.nih.gov/gene/23333
hsa-mir-4664	4	0.0054384	0.019101	0.927682	522	2	1.0996	2	NA
RBM17	6	0.0054604	0.024138	0.956268	523	4	1.7392	4	https://www.ncbi.nlm.nih.gov/gene/84991
DNAJC30	6	0.0054614	0.024141	0.956268	524	3	0.41136	3	https://www.ncbi.nlm.nih.gov/gene/84277
COL4A1	6	0.0055017	0.024292	0.957841	525	3	0.47543	3	https://www.ncbi.nlm.nih.gov/gene/1282
CPA5	6	0.0055492	0.024447	0.957841	526	4	1.4541	4	https://www.ncbi.nlm.nih.gov/gene/93979
SAYSD1	6	0.005563	0.024493	0.957841	527	4	1.6408	4	https://www.ncbi.nlm.nih.gov/gene/55776
SH3RF3	6	0.0055816	0.02455	0.957841	528	4	1.0594	4	https://www.ncbi.nlm.nih.gov/gene/344558
hsa-mir-5087	3	0.0055928	0.015331	0.927682	529	2	1.0397	2	NA
GRM3	6	0.005598	0.024603	0.957841	530	5	1.4872	5	https://www.ncbi.nlm.nih.gov/gene/2913
CYR61	6	0.0056184	0.024673	0.957841	531	3	1.2298	3	https://www.ncbi.nlm.nih.gov/gene/3491
ZDHHC17	6	0.0056281	0.024711	0.957841	532	4	1.3896	4	https://www.ncbi.nlm.nih.gov/gene/23390
ICMT	6	0.0056281	0.024711	0.957841	533	3	0.43769	3	https://www.ncbi.nlm.nih.gov/gene/23463
ZNF75D	6	0.0056281	0.024711	0.957841	534	4	0.85698	4	https://www.ncbi.nlm.nih.gov/gene/7626
AK7	6	0.0056281	0.024711	0.957841	535	4	0.61495	4	https://www.ncbi.nlm.nih.gov/gene/122481
hsa-mir-133a-1	4	0.0056424	0.019771	0.927682	536	4	1.0369	4	NA
ITPRIPL2	6	0.0056497	0.024791	0.958062	537	4	1.5655	4	https://www.ncbi.nlm.nih.gov/gene/162073
hsa-mir-132	4	0.005654	0.01981	0.927682	538	3	1.7738	3	NA
GALNT12	5	0.0056675	0.023425	0.94513	539	4	1.58	4	https://www.ncbi.nlm.nih.gov/gene/79695
RHBDL2	6	0.0056869	0.024946	0.960913	540	4	1.5712	4	https://www.ncbi.nlm.nih.gov/gene/54933
ANKRD35	6	0.0056968	0.024981	0.960913	541	5	1.1189	5	https://www.ncbi.nlm.nih.gov/gene/148741
INHBC	6	0.0057038	0.025011	0.960913	542	3	1.1491	3	https://www.ncbi.nlm.nih.gov/gene/3626
hsa-mir-134	4	0.0057119	0.019999	0.927682	543	3	1.6385	3	NA
hsa-mir-561	4	0.0057146	0.020005	0.927682	544	3	1.2939	3	https://www.ncbi.nlm.nih.gov/gene/693146
hsa-mir-197	3	0.0057953	0.015878	0.927682	545	2	1.7964	2	NA
NPB	5	0.0058351	0.024081	0.956268	546	5	1.6408	5	https://www.ncbi.nlm.nih.gov/gene/256933
ATP9B	6	0.005838	0.025481	0.971192	547	3	-0.72194	3	https://www.ncbi.nlm.nih.gov/gene/374868
SZT2	6	0.0058676	0.025602	0.973271	548	5	1.2209	5	https://www.ncbi.nlm.nih.gov/gene/23334
COMMD3-BMI1	2	0.0058746	0.011269	0.927682	549	2	2.6908	2	https://www.ncbi.nlm.nih.gov/gene/100532731
BOC	6	0.0059041	0.025748	0.973991	550	4	1.0701	4	https://www.ncbi.nlm.nih.gov/gene/91653
PPP1R17	6	0.0059064	0.025758	0.973991	551	5	1.6077	5	https://www.ncbi.nlm.nih.gov/gene/10842
PRSS50	6	0.0059184	0.0258	0.973991	552	4	1.2487	4	https://www.ncbi.nlm.nih.gov/gene/29122
FMOD	6	0.0059537	0.025915	0.976235	553	4	1.409	4	https://www.ncbi.nlm.nih.gov/gene/2331
DHRS4L2	4	0.0059668	0.020824	0.927682	554	2	0.86881	2	https://www.ncbi.nlm.nih.gov/gene/317749
SRSF4	6	0.0060098	0.026123	0.976235	555	5	1.6482	5	https://www.ncbi.nlm.nih.gov/gene/6429
FAM173A	6	0.006058	0.02629	0.976235	556	3	0.73	3	https://www.ncbi.nlm.nih.gov/gene/65990
TRAPPC4	6	0.006058	0.02629	0.976235	557	3	0.43329	3	https://www.ncbi.nlm.nih.gov/gene/51399
OCEL1	6	0.006058	0.02629	0.976235	558	3	0.49511	3	https://www.ncbi.nlm.nih.gov/gene/79629
TMPRSS11B	6	0.006058	0.02629	0.976235	559	3	0.67674	3	https://www.ncbi.nlm.nih.gov/gene/132724
NR3C1	6	0.0061727	0.026717	0.976235	560	5	1.3176	5	https://www.ncbi.nlm.nih.gov/gene/2908
NAPRT1	6	0.0061766	0.026733	0.976235	561	2	-0.0094359	2	https://www.ncbi.nlm.nih.gov/gene/93100
CMTM4	6	0.0061819	0.026753	0.976235	562	5	1.373	5	https://www.ncbi.nlm.nih.gov/gene/146223
TIMP1	6	0.0061823	0.026755	0.976235	563	4	1.5304	4	https://www.ncbi.nlm.nih.gov/gene/7076
MVD	6	0.0062059	0.026837	0.976235	564	4	0.81791	4	https://www.ncbi.nlm.nih.gov/gene/4597
SF3B1	6	0.0062097	0.026845	0.976235	565	3	0.34329	3	https://www.ncbi.nlm.nih.gov/gene/23451
KRTAP5-7	6	0.0062108	0.026848	0.976235	566	4	1.3208	4	https://www.ncbi.nlm.nih.gov/gene/440050
hsa-mir-548am	3	0.0062129	0.016975	0.927682	567	1	-0.26387	1	NA
SPRR2G	6	0.0062205	0.026891	0.976235	568	3	0.14798	3	https://www.ncbi.nlm.nih.gov/gene/6706
DCDC2	6	0.006229	0.026919	0.976235	569	5	1.2135	5	https://www.ncbi.nlm.nih.gov/gene/51473
ELAC2	5	0.0062623	0.025738	0.973991	570	3	1.9263	3	https://www.ncbi.nlm.nih.gov/gene/60528
LPPR2	6	0.0062776	0.027083	0.976235	571	4	1.5349	4	https://www.ncbi.nlm.nih.gov/gene/64748
PGBD2	6	0.0062793	0.027088	0.976235	572	3	0.98172	3	https://www.ncbi.nlm.nih.gov/gene/267002
AMZ1	6	0.0062856	0.027108	0.976235	573	3	-0.24172	3	https://www.ncbi.nlm.nih.gov/gene/155185
FAM193A	6	0.0063178	0.02723	0.976235	574	5	1.1174	5	https://www.ncbi.nlm.nih.gov/gene/8603
SNIP1	6	0.0063665	0.027395	0.976235	575	4	1.8515	4	https://www.ncbi.nlm.nih.gov/gene/79753
ITGB1BP2	6	0.0063734	0.027421	0.976235	576	3	0.94993	3	https://www.ncbi.nlm.nih.gov/gene/26548
TUBB6	6	0.0063769	0.027434	0.976235	577	4	1.5716	4	https://www.ncbi.nlm.nih.gov/gene/84617
C20orf173	6	0.0063833	0.02746	0.976235	578	5	1.5747	5	https://www.ncbi.nlm.nih.gov/gene/140873
BAI2	6	0.0063861	0.02747	0.976235	579	4	1.7758	4	https://www.ncbi.nlm.nih.gov/gene/576
PLCG1	6	0.0064205	0.027601	0.976235	580	5	1.129	5	https://www.ncbi.nlm.nih.gov/gene/5335
FZD6	6	0.0064618	0.027767	0.976235	581	5	1.2879	5	https://www.ncbi.nlm.nih.gov/gene/8323
EIF3A	6	0.0064648	0.027777	0.976235	582	3	-0.093769	3	https://www.ncbi.nlm.nih.gov/gene/8661
KRT38	6	0.0064719	0.0278	0.976235	583	5	1.4361	5	https://www.ncbi.nlm.nih.gov/gene/8687
RPS6	6	0.0065115	0.02795	0.976235	584	5	1.2571	5	https://www.ncbi.nlm.nih.gov/gene/6194
PPP1R26	6	0.0065131	0.027958	0.976235	585	2	-1.0764	2	https://www.ncbi.nlm.nih.gov/gene/9858
SMARCB1	6	0.0065131	0.027958	0.976235	586	3	0.49864	3	https://www.ncbi.nlm.nih.gov/gene/6598
FAM127C	6	0.0065131	0.027958	0.976235	587	2	-3.0736	2	https://www.ncbi.nlm.nih.gov/gene/441518
PVRL3	6	0.0065131	0.027958	0.976235	588	2	-0.34969	2	https://www.ncbi.nlm.nih.gov/gene/25945
BNIP2	6	0.0065131	0.027958	0.976235	589	3	0.41033	3	https://www.ncbi.nlm.nih.gov/gene/663
PTH2	6	0.0065131	0.027958	0.976235	590	4	1.2616	4	https://www.ncbi.nlm.nih.gov/gene/113091
GATA5	6	0.0065366	0.028043	0.976235	591	3	1.0374	3	https://www.ncbi.nlm.nih.gov/gene/140628
AGMO	6	0.0065447	0.028075	0.976235	592	3	-0.031929	3	https://www.ncbi.nlm.nih.gov/gene/392636
RCC2	6	0.0066024	0.028265	0.976235	593	2	0.44983	2	https://www.ncbi.nlm.nih.gov/gene/55920
MON1B	6	0.0066045	0.028272	0.976235	594	3	1.1066	3	https://www.ncbi.nlm.nih.gov/gene/22879
PFN3	6	0.0066578	0.028467	0.976235	595	5	1.1882	5	https://www.ncbi.nlm.nih.gov/gene/345456
ATL2	6	0.0066578	0.028467	0.976235	596	5	1.4039	5	https://www.ncbi.nlm.nih.gov/gene/64225
FIBP	6	0.0066578	0.028467	0.976235	597	5	1.061	5	https://www.ncbi.nlm.nih.gov/gene/9158
ATG12	6	0.0066746	0.028522	0.976235	598	5	1.2954	5	https://www.ncbi.nlm.nih.gov/gene/9140
FEZ1	6	0.0067007	0.028606	0.976235	599	5	1.3404	5	https://www.ncbi.nlm.nih.gov/gene/9638
NOL7	6	0.0067152	0.028653	0.976235	600	2	-1.3993	2	https://www.ncbi.nlm.nih.gov/gene/51406
AKAP7	6	0.0067363	0.028733	0.976235	601	2	-4.3518	2	https://www.ncbi.nlm.nih.gov/gene/9465
CLSPN	6	0.0067505	0.028789	0.976235	602	4	1.7905	4	https://www.ncbi.nlm.nih.gov/gene/63967
RBP7	6	0.0067505	0.028789	0.976235	603	4	1.5894	4	https://www.ncbi.nlm.nih.gov/gene/116362
NXNL1	6	0.0067658	0.028843	0.976235	604	3	0.35949	3	https://www.ncbi.nlm.nih.gov/gene/115861
CEP89	6	0.0067753	0.028873	0.976235	605	5	0.98383	5	https://www.ncbi.nlm.nih.gov/gene/84902
CAPN3	5	0.0067906	0.027724	0.976235	606	5	1.3881	5	https://www.ncbi.nlm.nih.gov/gene/825
RHEB	6	0.0068416	0.0291	0.978298	607	1	-2.1583	1	https://www.ncbi.nlm.nih.gov/gene/6009
USP4	6	0.0068416	0.0291	0.978298	608	3	1.1877	3	https://www.ncbi.nlm.nih.gov/gene/7375
LCN6	6	0.0069047	0.029304	0.978298	609	5	1.4163	5	https://www.ncbi.nlm.nih.gov/gene/158062
KRTAP10-2	6	0.0069155	0.029345	0.978298	610	5	1.2907	5	https://www.ncbi.nlm.nih.gov/gene/386679
RALY	6	0.006934	0.029398	0.978298	611	5	1.6918	5	https://www.ncbi.nlm.nih.gov/gene/22913
URGCP	5	0.0069349	0.028272	0.976235	612	4	1.5624	4	https://www.ncbi.nlm.nih.gov/gene/55665
DAG1	6	0.0069353	0.029403	0.978298	613	5	0.97212	5	https://www.ncbi.nlm.nih.gov/gene/1605
ZNF714	5	0.0069358	0.028275	0.976235	614	4	0.70731	4	https://www.ncbi.nlm.nih.gov/gene/148206
GABRA2	5	0.0069845	0.028464	0.976235	615	4	1.4133	4	https://www.ncbi.nlm.nih.gov/gene/2555
TMX4	5	0.0069898	0.028484	0.976235	616	3	0.73031	3	https://www.ncbi.nlm.nih.gov/gene/56255
SH3KBP1	6	0.0069932	0.029606	0.978298	617	2	-0.7022	2	https://www.ncbi.nlm.nih.gov/gene/30011
SAMD4B	6	0.0069932	0.029606	0.978298	618	3	-0.014293	3	https://www.ncbi.nlm.nih.gov/gene/55095
ARHGEF17	6	0.0070105	0.029676	0.978298	619	4	1.3579	4	https://www.ncbi.nlm.nih.gov/gene/9828
TCAIM	6	0.0070276	0.029735	0.978298	620	4	1.463	4	https://www.ncbi.nlm.nih.gov/gene/285343
ZNF414	6	0.0070318	0.029752	0.978298	621	4	1.2052	4	https://www.ncbi.nlm.nih.gov/gene/84330
RADIL	5	0.0070319	0.028642	0.976235	622	3	1.6003	3	https://www.ncbi.nlm.nih.gov/gene/55698
PSMB11	6	0.007038	0.029772	0.978298	623	5	1.1773	5	https://www.ncbi.nlm.nih.gov/gene/122706
OR10T2	6	0.0070917	0.029978	0.978298	624	4	1.4444	4	https://www.ncbi.nlm.nih.gov/gene/128360
DCLRE1C	6	0.0071082	0.030039	0.978298	625	3	0.83974	3	https://www.ncbi.nlm.nih.gov/gene/64421
CRABP2	6	0.0071169	0.030066	0.978298	626	2	-2.5712	2	https://www.ncbi.nlm.nih.gov/gene/1382
TMEM17	4	0.0071295	0.024577	0.957841	627	4	1.881	4	https://www.ncbi.nlm.nih.gov/gene/200728
TIAF1	6	0.00713	0.030116	0.978298	628	4	1.4918	4	https://www.ncbi.nlm.nih.gov/gene/9220
hsa-mir-6511a-1	4	0.0071514	0.024655	0.957841	629	3	1.8505	3	https://www.ncbi.nlm.nih.gov/gene/102466268
BCAT1	6	0.0071698	0.030249	0.978298	630	5	1.4832	5	https://www.ncbi.nlm.nih.gov/gene/586
hsa-mir-632	4	0.0071961	0.024804	0.958062	631	4	1.5823	4	https://www.ncbi.nlm.nih.gov/gene/693217
CD68	6	0.0072127	0.030373	0.978298	632	5	1.6586	5	https://www.ncbi.nlm.nih.gov/gene/968
ITGB6	6	0.0072505	0.030505	0.978298	633	5	1.3538	5	https://www.ncbi.nlm.nih.gov/gene/3694
OR8A1	6	0.0072614	0.030539	0.978298	634	4	1.7289	4	https://www.ncbi.nlm.nih.gov/gene/390275
NXPH4	5	0.0072641	0.029481	0.978298	635	4	1.4625	4	https://www.ncbi.nlm.nih.gov/gene/11247
MAST4	6	0.0072897	0.030644	0.978298	636	2	0.084394	2	https://www.ncbi.nlm.nih.gov/gene/375449
C6orf203	6	0.0072946	0.030661	0.978298	637	5	1.6443	5	https://www.ncbi.nlm.nih.gov/gene/51250
PANX1	6	0.0073135	0.030726	0.978298	638	5	0.98506	5	https://www.ncbi.nlm.nih.gov/gene/24145
STAM	6	0.0073215	0.030749	0.978298	639	2	-1.5701	2	https://www.ncbi.nlm.nih.gov/gene/8027
GLA	6	0.0073215	0.030749	0.978298	640	1	-0.30055	1	https://www.ncbi.nlm.nih.gov/gene/2717
FBXO47	6	0.0073215	0.030749	0.978298	641	3	0.50266	3	https://www.ncbi.nlm.nih.gov/gene/494188
CTNNA1	6	0.0073215	0.030749	0.978298	642	2	-0.30059	2	https://www.ncbi.nlm.nih.gov/gene/1495
REPIN1	6	0.0073215	0.030749	0.978298	643	3	0.94233	3	https://www.ncbi.nlm.nih.gov/gene/29803
GMFG	5	0.0073266	0.029731	0.978298	644	1	-1.768	1	https://www.ncbi.nlm.nih.gov/gene/9535
hsa-mir-566	3	0.0073387	0.019929	0.927682	645	1	-0.031671	1	NA
SIK1	6	0.0073392	0.030812	0.978298	646	5	1.4918	5	https://www.ncbi.nlm.nih.gov/gene/150094
STARD8	6	0.0073478	0.030836	0.978298	647	4	1.0713	4	https://www.ncbi.nlm.nih.gov/gene/9754
GEMIN5	6	0.007354	0.03086	0.978298	648	5	1.3651	5	https://www.ncbi.nlm.nih.gov/gene/25929
CLEC1A	6	0.0073849	0.030968	0.978298	649	5	1.0114	5	https://www.ncbi.nlm.nih.gov/gene/51267
hsa-mir-6807	4	0.0074017	0.025482	0.971192	650	4	1.6349	4	https://www.ncbi.nlm.nih.gov/gene/102465976
C15orf59	6	0.0074068	0.031043	0.978298	651	5	1.2758	5	https://www.ncbi.nlm.nih.gov/gene/388135
RFX8	6	0.0074142	0.03107	0.978298	652	5	0.9787	5	https://www.ncbi.nlm.nih.gov/gene/731220
CEP41	6	0.0074142	0.03107	0.978298	653	5	1.2185	5	https://www.ncbi.nlm.nih.gov/gene/95681
PKLR	6	0.007422	0.031091	0.978298	654	2	-1.4259	2	https://www.ncbi.nlm.nih.gov/gene/5313
YTHDC2	6	0.0074267	0.031111	0.978298	655	5	1.5295	5	https://www.ncbi.nlm.nih.gov/gene/64848
SRC	6	0.0074326	0.031133	0.978298	656	4	1.116	4	https://www.ncbi.nlm.nih.gov/gene/6714
CST9	6	0.0074722	0.031272	0.978298	657	5	1.2246	5	https://www.ncbi.nlm.nih.gov/gene/128822
ERMARD	6	0.0074722	0.031272	0.978298	658	5	1.3154	5	https://www.ncbi.nlm.nih.gov/gene/55780
CISD3	6	0.0074779	0.031291	0.978298	659	3	0.75201	3	https://www.ncbi.nlm.nih.gov/gene/284106
KIAA1644	6	0.0074969	0.03137	0.978298	660	5	1.0218	5	https://www.ncbi.nlm.nih.gov/gene/85352
TMED3	6	0.0075196	0.031461	0.978298	661	4	1.1129	4	https://www.ncbi.nlm.nih.gov/gene/23423
KRTAP5-10	6	0.0075527	0.031585	0.978298	662	3	0.28931	3	https://www.ncbi.nlm.nih.gov/gene/387273
CCDC22	6	0.0075548	0.031592	0.978298	663	5	1.2723	5	https://www.ncbi.nlm.nih.gov/gene/28952
RAPGEF3	6	0.0075568	0.031599	0.978298	664	4	1.3986	4	https://www.ncbi.nlm.nih.gov/gene/10411
hsa-mir-6886	4	0.0075598	0.026007	0.976235	665	3	1.7132	3	https://www.ncbi.nlm.nih.gov/gene/102465534
TGIF2LY	6	0.0075741	0.031661	0.978298	666	3	0.34557	3	https://www.ncbi.nlm.nih.gov/gene/90655
EMILIN2	6	0.0075988	0.031739	0.978298	667	5	1.2443	5	https://www.ncbi.nlm.nih.gov/gene/84034
CHRND	6	0.0076117	0.031786	0.978298	668	3	0.41311	3	https://www.ncbi.nlm.nih.gov/gene/1144
APOLD1	5	0.0076213	0.030824	0.978298	669	2	-0.95143	2	https://www.ncbi.nlm.nih.gov/gene/81575
C1orf192	6	0.0076246	0.031832	0.978298	670	3	-0.37015	3	https://www.ncbi.nlm.nih.gov/gene/257177
ASB6	6	0.0076825	0.032034	0.978298	671	3	1.0646	3	https://www.ncbi.nlm.nih.gov/gene/140459
ARIH2OS	5	0.0076873	0.031075	0.978298	672	4	1.1924	4	https://www.ncbi.nlm.nih.gov/gene/646450
ABCC4	6	0.007704	0.032101	0.978298	673	5	1.0402	5	https://www.ncbi.nlm.nih.gov/gene/10257
FGF3	5	0.0077055	0.031145	0.978298	674	4	1.2864	4	https://www.ncbi.nlm.nih.gov/gene/2248
PGRMC1	6	0.0077256	0.032175	0.978298	675	4	1.0442	4	https://www.ncbi.nlm.nih.gov/gene/10857
TTC25	6	0.0077765	0.032363	0.978298	676	3	-0.7946	3	https://www.ncbi.nlm.nih.gov/gene/83538
STX3	6	0.0077795	0.032371	0.978298	677	4	1.821	4	https://www.ncbi.nlm.nih.gov/gene/6809
PSMB7	6	0.0077797	0.032372	0.978298	678	5	1.2952	5	https://www.ncbi.nlm.nih.gov/gene/5695
hsa-mir-320e	4	0.007787	0.026727	0.976235	679	1	-0.83992	1	NA
BLMH	6	0.0077964	0.032434	0.978298	680	5	1.3597	5	https://www.ncbi.nlm.nih.gov/gene/642
TAF1A	6	0.0078188	0.032515	0.978298	681	4	1.7188	4	https://www.ncbi.nlm.nih.gov/gene/9015
STAB2	6	0.0078281	0.032551	0.978298	682	4	0.74988	4	https://www.ncbi.nlm.nih.gov/gene/55576
NonTargetingControlGuideForHuman_0645	1	0.0078564	0.0078158	0.927682	683	1	3.2473	1	NA
JOSD2	6	0.0078936	0.032776	0.978298	684	3	0.27581	3	https://www.ncbi.nlm.nih.gov/gene/126119
OR4F15	6	0.0079275	0.032891	0.978298	685	2	0.052323	2	https://www.ncbi.nlm.nih.gov/gene/390649
SIRPB1	6	0.0079275	0.032891	0.978298	686	3	0.79695	3	https://www.ncbi.nlm.nih.gov/gene/10326
AGO2	6	0.0079275	0.032891	0.978298	687	1	-4.3318	1	https://www.ncbi.nlm.nih.gov/gene/27161
IL18RAP	6	0.0079275	0.032891	0.978298	688	3	0.49331	3	https://www.ncbi.nlm.nih.gov/gene/8807
TDRD6	6	0.0079275	0.032891	0.978298	689	2	-2.7061	2	https://www.ncbi.nlm.nih.gov/gene/221400
TBX4	6	0.0079275	0.032891	0.978298	690	4	1.2172	4	https://www.ncbi.nlm.nih.gov/gene/9496
COX18	6	0.0079275	0.032891	0.978298	691	3	0.4042	3	https://www.ncbi.nlm.nih.gov/gene/285521
LEMD3	4	0.0079554	0.027243	0.976235	692	4	1.4031	4	https://www.ncbi.nlm.nih.gov/gene/23592
BACE2	6	0.0079676	0.03302	0.978298	693	3	0.73712	3	https://www.ncbi.nlm.nih.gov/gene/25825
C5orf52	6	0.0080033	0.033139	0.978298	694	4	1.1385	4	https://www.ncbi.nlm.nih.gov/gene/100190949
ARIH2	6	0.0080137	0.033177	0.978298	695	5	1.0007	5	https://www.ncbi.nlm.nih.gov/gene/10425
TDRKH	6	0.0080342	0.033245	0.978298	696	5	1.2909	5	https://www.ncbi.nlm.nih.gov/gene/11022
IFI35	6	0.0080672	0.033354	0.978298	697	5	1.111	5	https://www.ncbi.nlm.nih.gov/gene/3430
hsa-mir-106a	4	0.0080773	0.027626	0.976235	698	4	1.0848	4	NA
OR6C65	6	0.0080861	0.033407	0.978298	699	5	1.0419	5	https://www.ncbi.nlm.nih.gov/gene/403282
RAET1L	6	0.0080896	0.033418	0.978298	700	3	1.0423	3	https://www.ncbi.nlm.nih.gov/gene/154064
TARM1	6	0.008108	0.033484	0.978298	701	3	1.0661	3	https://www.ncbi.nlm.nih.gov/gene/441864
GCNT1	6	0.0081303	0.033559	0.978298	702	2	0.10155	2	https://www.ncbi.nlm.nih.gov/gene/2650
PACS2	5	0.0081603	0.032855	0.978298	703	4	1.7398	4	https://www.ncbi.nlm.nih.gov/gene/23241
MEA1	6	0.0081604	0.03366	0.978298	704	4	1.6897	4	https://www.ncbi.nlm.nih.gov/gene/4201
NDUFB8	6	0.0081622	0.033666	0.978298	705	4	1.6048	4	https://www.ncbi.nlm.nih.gov/gene/4714
CDCA3	6	0.0081622	0.033666	0.978298	706	4	1.4932	4	https://www.ncbi.nlm.nih.gov/gene/83461
DCSTAMP	6	0.0081803	0.033732	0.978298	707	3	0.50673	3	https://www.ncbi.nlm.nih.gov/gene/81501
AMMECR1L	6	0.0081956	0.033782	0.978298	708	4	1.5035	4	https://www.ncbi.nlm.nih.gov/gene/83607
ZFAND1	6	0.0082277	0.033894	0.978298	709	5	1.5429	5	https://www.ncbi.nlm.nih.gov/gene/79752
MINK1	6	0.0082809	0.034071	0.978298	710	2	-0.016682	2	https://www.ncbi.nlm.nih.gov/gene/50488
SCIMP	6	0.0082809	0.034071	0.978298	711	3	0.61982	3	https://www.ncbi.nlm.nih.gov/gene/388325
C10orf82	6	0.008289	0.034106	0.978298	712	4	0.70276	4	https://www.ncbi.nlm.nih.gov/gene/143379
TSPYL1	6	0.0083318	0.034243	0.978298	713	5	0.95349	5	https://www.ncbi.nlm.nih.gov/gene/7259
SPTBN5	6	0.008335	0.034253	0.978298	714	5	1.6042	5	https://www.ncbi.nlm.nih.gov/gene/51332
DHDH	6	0.0083422	0.034275	0.978298	715	4	0.70227	4	https://www.ncbi.nlm.nih.gov/gene/27294
NOP14	6	0.0083453	0.034288	0.978298	716	5	1.498	5	https://www.ncbi.nlm.nih.gov/gene/8602
TMEM175	6	0.0083787	0.034404	0.978298	717	4	1.578	4	https://www.ncbi.nlm.nih.gov/gene/84286
CXorf27	6	0.0083824	0.034419	0.978298	718	4	1.3844	4	https://www.ncbi.nlm.nih.gov/gene/25763
hsa-mir-1181	4	0.0083856	0.028624	0.976235	719	4	1.3271	4	https://www.ncbi.nlm.nih.gov/gene/100302213
hsa-mir-3605	4	0.0083942	0.02865	0.976235	720	4	1.9077	4	NA
C1orf61	6	0.0084181	0.034536	0.978298	721	2	-0.028514	2	https://www.ncbi.nlm.nih.gov/gene/10485
DTNB	6	0.008435	0.034593	0.978298	722	4	1.2953	4	https://www.ncbi.nlm.nih.gov/gene/1838
ANKZF1	6	0.0084492	0.034647	0.978298	723	3	0.10389	3	https://www.ncbi.nlm.nih.gov/gene/55139
ISLR2	6	0.0085109	0.034872	0.978298	724	3	0.77377	3	https://www.ncbi.nlm.nih.gov/gene/57611
IQCE	6	0.0085553	0.035029	0.978298	725	4	1.15	4	https://www.ncbi.nlm.nih.gov/gene/23288
TAL2	6	0.0085837	0.035133	0.978298	726	3	1.0578	3	https://www.ncbi.nlm.nih.gov/gene/6887
ASPH	6	0.0085837	0.035133	0.978298	727	2	-0.2	2	https://www.ncbi.nlm.nih.gov/gene/444
BCL2L1	6	0.0085837	0.035133	0.978298	728	2	-0.75698	2	https://www.ncbi.nlm.nih.gov/gene/598
RNF220	6	0.0085837	0.035133	0.978298	729	4	1.0556	4	https://www.ncbi.nlm.nih.gov/gene/55182
TMEM61	6	0.0085844	0.035136	0.978298	730	5	1.1928	5	https://www.ncbi.nlm.nih.gov/gene/199964
COX6B2	6	0.0085884	0.035147	0.978298	731	3	-0.33394	3	https://www.ncbi.nlm.nih.gov/gene/125965
KLF10	6	0.0086078	0.035225	0.978298	732	3	0.78454	3	https://www.ncbi.nlm.nih.gov/gene/7071
AQP6	6	0.0086496	0.035388	0.978298	733	4	1.0995	4	https://www.ncbi.nlm.nih.gov/gene/363
FBXO28	6	0.008657	0.035409	0.978298	734	5	1.1966	5	https://www.ncbi.nlm.nih.gov/gene/23219
MEF2D	5	0.008661	0.034724	0.978298	735	3	1.6566	3	https://www.ncbi.nlm.nih.gov/gene/4209
MAGOHB	5	0.0086652	0.03474	0.978298	736	4	1.5041	4	https://www.ncbi.nlm.nih.gov/gene/55110
TIPARP	6	0.0086677	0.035455	0.978298	737	4	1.0543	4	https://www.ncbi.nlm.nih.gov/gene/25976
KRBA1	6	0.0086817	0.035496	0.978298	738	3	0.99168	3	https://www.ncbi.nlm.nih.gov/gene/84626
OLFM1	6	0.0086842	0.03551	0.978298	739	5	1.2276	5	https://www.ncbi.nlm.nih.gov/gene/10439
STRN4	6	0.0087137	0.035624	0.978298	740	3	0.72226	3	https://www.ncbi.nlm.nih.gov/gene/29888
NUSAP1	6	0.008715	0.035632	0.978298	741	5	1.0609	5	https://www.ncbi.nlm.nih.gov/gene/51203
PTPN11	6	0.0087351	0.035699	0.978298	742	2	0.21351	2	https://www.ncbi.nlm.nih.gov/gene/5781
HS3ST3B1	5	0.0087369	0.034999	0.978298	743	3	1.6443	3	https://www.ncbi.nlm.nih.gov/gene/9953
NKX2-1	5	0.0087602	0.035081	0.978298	744	5	1.6529	5	https://www.ncbi.nlm.nih.gov/gene/7080
ARMCX3	6	0.0087766	0.035843	0.978298	745	5	1.251	5	https://www.ncbi.nlm.nih.gov/gene/51566
A4GNT	6	0.0087958	0.035905	0.978298	746	5	1.2548	5	https://www.ncbi.nlm.nih.gov/gene/51146
MTMR11	6	0.008836	0.036051	0.978298	747	2	0.040211	2	https://www.ncbi.nlm.nih.gov/gene/10903
FAM76B	6	0.0088557	0.036118	0.978298	748	5	1.4486	5	https://www.ncbi.nlm.nih.gov/gene/143684
hsa-mir-6165	4	0.0088935	0.030223	0.978298	749	2	1.3369	2	https://www.ncbi.nlm.nih.gov/gene/102465141
OR10G2	6	0.0089283	0.036369	0.978298	750	5	1.039	5	https://www.ncbi.nlm.nih.gov/gene/26534
TEX15	6	0.0089369	0.036395	0.978298	751	3	0.23466	3	https://www.ncbi.nlm.nih.gov/gene/56154
OR10H3	6	0.0089369	0.036395	0.978298	752	4	0.89405	4	https://www.ncbi.nlm.nih.gov/gene/26532
TPRX1	6	0.0089754	0.036541	0.978298	753	4	1.5766	4	https://www.ncbi.nlm.nih.gov/gene/284355
hsa-mir-941-1	4	0.008996	0.030545	0.978298	754	4	0.91386	4	NA
NFS1	6	0.0090255	0.036706	0.978298	755	5	1.1469	5	https://www.ncbi.nlm.nih.gov/gene/9054
PTPN7	6	0.0090601	0.036829	0.978298	756	2	-1.6606	2	https://www.ncbi.nlm.nih.gov/gene/5778
SGOL2	6	0.009063	0.036836	0.978298	757	3	-0.15237	3	https://www.ncbi.nlm.nih.gov/gene/151246
B3GNTL1	6	0.009063	0.036836	0.978298	758	3	0.93766	3	https://www.ncbi.nlm.nih.gov/gene/146712
KIAA0020	5	0.0090937	0.036292	0.978298	759	4	1.1137	4	https://www.ncbi.nlm.nih.gov/gene/9933
TMEM54	6	0.0091204	0.037046	0.978298	760	4	1.5442	4	https://www.ncbi.nlm.nih.gov/gene/113452
PLA2G2A	6	0.0091249	0.03706	0.978298	761	5	1.467	5	https://www.ncbi.nlm.nih.gov/gene/5320
RAC1	6	0.0091707	0.03721	0.978298	762	4	1.3199	4	https://www.ncbi.nlm.nih.gov/gene/5879
GLG1	6	0.0091996	0.037299	0.978298	763	5	1.0977	5	https://www.ncbi.nlm.nih.gov/gene/2734
ADRA2B	6	0.0092052	0.037315	0.978298	764	4	1.3353	4	https://www.ncbi.nlm.nih.gov/gene/151
OTUD1	5	0.0092737	0.036971	0.978298	765	5	0.79898	5	https://www.ncbi.nlm.nih.gov/gene/220213
PLA2G3	6	0.0092829	0.037589	0.978298	766	4	1.4682	4	https://www.ncbi.nlm.nih.gov/gene/50487
OR1G1	6	0.009306	0.037659	0.978298	767	5	1.5915	5	https://www.ncbi.nlm.nih.gov/gene/8390
CYP2J2	6	0.0093123	0.037682	0.978298	768	5	1.1797	5	https://www.ncbi.nlm.nih.gov/gene/1573
C5orf54	6	0.0093355	0.037761	0.978298	769	5	1.1813	5	https://www.ncbi.nlm.nih.gov/gene/63920
hsa-mir-499b	3	0.0093366	0.025079	0.961804	770	3	1.3475	3	https://www.ncbi.nlm.nih.gov/gene/100616134
VAC14	6	0.0093444	0.037796	0.978298	771	5	1.3683	5	https://www.ncbi.nlm.nih.gov/gene/55697
hsa-mir-6513	4	0.0093474	0.031669	0.978298	772	4	1.1659	4	https://www.ncbi.nlm.nih.gov/gene/102465256
ORC6	6	0.0093508	0.037821	0.978298	773	5	1.4865	5	https://www.ncbi.nlm.nih.gov/gene/23594
SLC35E4	6	0.0093553	0.037835	0.978298	774	5	1.0646	5	https://www.ncbi.nlm.nih.gov/gene/339665
NINL	6	0.0093602	0.037852	0.978298	775	3	-0.093266	3	https://www.ncbi.nlm.nih.gov/gene/22981
DLGAP4	6	0.0093656	0.037869	0.978298	776	2	-1.7234	2	https://www.ncbi.nlm.nih.gov/gene/22839
FLJ44635	6	0.0093713	0.037891	0.978298	777	4	1.3509	4	https://www.ncbi.nlm.nih.gov/gene/392490
FBXO31	6	0.0093981	0.037993	0.978298	778	3	0.31893	3	https://www.ncbi.nlm.nih.gov/gene/79791
WNT7B	6	0.009402	0.038006	0.978298	779	5	0.94419	5	https://www.ncbi.nlm.nih.gov/gene/7477
CLN3	6	0.0094207	0.038059	0.978298	780	3	1.0824	3	https://www.ncbi.nlm.nih.gov/gene/1201
hsa-mir-4746	4	0.0094286	0.031922	0.978298	781	4	0.88089	4	NA
FADS6	6	0.009441	0.038129	0.978298	782	4	1.3583	4	https://www.ncbi.nlm.nih.gov/gene/283985
IGFBP6	6	0.0094412	0.038131	0.978298	783	3	0.44088	3	https://www.ncbi.nlm.nih.gov/gene/3489
FAM25A	5	0.0095141	0.037699	0.978298	784	2	-0.7273	2	https://www.ncbi.nlm.nih.gov/gene/643161
HLF	6	0.0095168	0.038413	0.978298	785	3	0.51672	3	https://www.ncbi.nlm.nih.gov/gene/3131
SMR3A	6	0.0095232	0.038436	0.978298	786	5	1.335	5	https://www.ncbi.nlm.nih.gov/gene/26952
GSTM4	5	0.0095252	0.037726	0.978298	787	3	1.4737	3	https://www.ncbi.nlm.nih.gov/gene/2948
VLDLR	6	0.0095847	0.038632	0.978298	788	4	1.4671	4	https://www.ncbi.nlm.nih.gov/gene/7436
ATP2B1	6	0.0096037	0.038703	0.978298	789	4	0.93661	4	https://www.ncbi.nlm.nih.gov/gene/490
DIRAS3	6	0.0096303	0.038795	0.978298	790	4	1.3402	4	https://www.ncbi.nlm.nih.gov/gene/9077
NGB	6	0.0096397	0.038825	0.978298	791	3	0.44084	3	https://www.ncbi.nlm.nih.gov/gene/58157
LAT	6	0.009647	0.03885	0.978298	792	5	0.87949	5	https://www.ncbi.nlm.nih.gov/gene/27040
ZNF514	6	0.0096653	0.038909	0.978298	793	3	1.0782	3	https://www.ncbi.nlm.nih.gov/gene/84874
NAP1L5	6	0.0096751	0.038938	0.978298	794	5	1.2055	5	https://www.ncbi.nlm.nih.gov/gene/266812
AKT1S1	6	0.0096907	0.038993	0.978298	795	4	0.90434	4	https://www.ncbi.nlm.nih.gov/gene/84335
KCNA10	6	0.0096918	0.038995	0.978298	796	4	1.458	4	https://www.ncbi.nlm.nih.gov/gene/3744
ANAPC4	6	0.0097185	0.039097	0.978298	797	2	0.026484	2	https://www.ncbi.nlm.nih.gov/gene/29945
PPID	6	0.0097185	0.039097	0.978298	798	4	1.2122	4	https://www.ncbi.nlm.nih.gov/gene/5481
RERG	6	0.0097257	0.039127	0.978298	799	4	1.1787	4	https://www.ncbi.nlm.nih.gov/gene/85004
NonTargetingControlGuideForHuman_0822	1	0.0097411	0.0096887	0.927682	800	1	3.1076	1	NA
TMEM173	6	0.0097421	0.039186	0.978298	801	4	1.4209	4	https://www.ncbi.nlm.nih.gov/gene/340061
PTPN22	6	0.0097614	0.039255	0.978298	802	5	1.339	5	https://www.ncbi.nlm.nih.gov/gene/26191
MESDC1	6	0.009769	0.039276	0.978298	803	4	0.97413	4	https://www.ncbi.nlm.nih.gov/gene/59274
ATP5SL	6	0.0097919	0.039362	0.978298	804	4	1.0812	4	https://www.ncbi.nlm.nih.gov/gene/55101
STK35	6	0.0098033	0.039403	0.978298	805	4	1.2768	4	https://www.ncbi.nlm.nih.gov/gene/140901
PLAC1L	6	0.0098422	0.039541	0.978298	806	5	0.89737	5	https://www.ncbi.nlm.nih.gov/gene/219990
PGAP3	6	0.0098598	0.0396	0.978298	807	3	-0.79084	3	https://www.ncbi.nlm.nih.gov/gene/93210
HOXD10	6	0.0098949	0.039726	0.978298	808	4	1.0709	4	https://www.ncbi.nlm.nih.gov/gene/3236
NOTCH2NL	6	0.0099208	0.039806	0.978298	809	4	1.4803	4	https://www.ncbi.nlm.nih.gov/gene/388677
NUTM2A	6	0.0099264	0.039824	0.978298	810	5	1.3479	5	https://www.ncbi.nlm.nih.gov/gene/728118
CKS2	6	0.0099276	0.039825	0.978298	811	5	1.1322	5	https://www.ncbi.nlm.nih.gov/gene/1164
CYP2D6	6	0.0099515	0.039883	0.978298	812	3	0.9018	3	https://www.ncbi.nlm.nih.gov/gene/1565
hsa-mir-1184-3	3	0.0099589	0.02667	0.976235	813	3	1.3916	3	NA
SERPINC1	6	0.0099631	0.039921	0.978298	814	5	1.1515	5	https://www.ncbi.nlm.nih.gov/gene/462
DRAP1	6	0.0099705	0.03994	0.978298	815	2	-0.76734	2	https://www.ncbi.nlm.nih.gov/gene/10589
MGAT4B	6	0.0099705	0.03994	0.978298	816	4	1.0509	4	https://www.ncbi.nlm.nih.gov/gene/11282
HNF1B	6	0.0099825	0.039983	0.978298	817	5	1.0498	5	https://www.ncbi.nlm.nih.gov/gene/6928
SLC14A2	6	0.0099947	0.040027	0.978298	818	4	1.4533	4	https://www.ncbi.nlm.nih.gov/gene/8170
hsa-mir-6775	4	0.010016	0.033782	0.978298	819	4	1.0424	4	https://www.ncbi.nlm.nih.gov/gene/102465464
ZNF248	6	0.010046	0.040204	0.978298	820	4	1.0228	4	https://www.ncbi.nlm.nih.gov/gene/57209
ZNF548	6	0.010053	0.040222	0.978298	821	5	1.0953	5	https://www.ncbi.nlm.nih.gov/gene/147694
NRGN	6	0.010056	0.040232	0.978298	822	4	1.1918	4	https://www.ncbi.nlm.nih.gov/gene/4900
AKAP17A_X	6	0.010063	0.040257	0.978298	823	5	0.77138	5	NA
DHX37	6	0.010085	0.040336	0.978298	824	3	0.099217	3	https://www.ncbi.nlm.nih.gov/gene/57647
LRFN4	6	0.01009	0.040353	0.978298	825	5	1.4044	5	https://www.ncbi.nlm.nih.gov/gene/78999
SHE	6	0.010097	0.040376	0.978298	826	2	-2.8185	2	https://www.ncbi.nlm.nih.gov/gene/126669
IMPG2	5	0.010102	0.039338	0.978298	827	1	-0.53704	1	https://www.ncbi.nlm.nih.gov/gene/50939
hsa-mir-8077	4	0.010153	0.034214	0.978298	828	2	1.297	2	https://www.ncbi.nlm.nih.gov/gene/102465875
DNAJB3	6	0.010213	0.040776	0.978298	829	4	1.624	4	https://www.ncbi.nlm.nih.gov/gene/414061
BIRC5	6	0.010232	0.040838	0.978298	830	4	1.5053	4	https://www.ncbi.nlm.nih.gov/gene/332
KCNJ3	6	0.010247	0.040885	0.978298	831	5	0.88807	5	https://www.ncbi.nlm.nih.gov/gene/3760
ARL17B	2	0.010292	0.019513	0.927682	832	2	2.3413	2	https://www.ncbi.nlm.nih.gov/gene/100506084
TTC26	6	0.010317	0.041107	0.978298	833	5	0.8863	5	https://www.ncbi.nlm.nih.gov/gene/79989
ZMIZ2	5	0.010333	0.039988	0.978298	834	2	-0.44727	2	https://www.ncbi.nlm.nih.gov/gene/83637
CADM2	6	0.010336	0.041166	0.978298	835	5	1.0771	5	https://www.ncbi.nlm.nih.gov/gene/253559
ELAVL4	6	0.010348	0.041218	0.978298	836	4	0.86972	4	https://www.ncbi.nlm.nih.gov/gene/1996
TMEM117	6	0.010348	0.041218	0.978298	837	3	0.1703	3	https://www.ncbi.nlm.nih.gov/gene/84216
GABRA5	6	0.010348	0.041218	0.978298	838	1	-2.2979	1	https://www.ncbi.nlm.nih.gov/gene/2558
STK31	6	0.010348	0.041218	0.978298	839	2	-0.14997	2	https://www.ncbi.nlm.nih.gov/gene/56164
TMEM230	6	0.010348	0.041218	0.978298	840	3	0.24409	3	https://www.ncbi.nlm.nih.gov/gene/29058
OPTC	6	0.010348	0.041218	0.978298	841	2	-0.26401	2	https://www.ncbi.nlm.nih.gov/gene/26254
KIAA0317	4	0.010397	0.034985	0.978298	842	4	1.3775	4	https://www.ncbi.nlm.nih.gov/gene/9870
AGA	6	0.010404	0.04141	0.978298	843	5	0.99747	5	https://www.ncbi.nlm.nih.gov/gene/175
C12orf65	6	0.010428	0.041486	0.978298	844	4	1.3599	4	https://www.ncbi.nlm.nih.gov/gene/91574
CDKN1C	6	0.01045	0.041562	0.978298	845	4	1.1187	4	https://www.ncbi.nlm.nih.gov/gene/1028
hsa-mir-4466	4	0.010462	0.035184	0.978298	846	1	-3.7993	1	NA
WNT10A	6	0.010467	0.041624	0.978298	847	5	1.2245	5	https://www.ncbi.nlm.nih.gov/gene/80326
ACVR1C	6	0.010469	0.041628	0.978298	848	5	1.3222	5	https://www.ncbi.nlm.nih.gov/gene/130399
FAM78A	6	0.010549	0.041892	0.978298	849	4	0.96132	4	https://www.ncbi.nlm.nih.gov/gene/286336
AMBN	6	0.010554	0.041907	0.978298	850	4	1.3686	4	https://www.ncbi.nlm.nih.gov/gene/258
TTLL3	4	0.010557	0.035476	0.978298	851	2	-0.58938	2	https://www.ncbi.nlm.nih.gov/gene/26140
hsa-mir-3656	4	0.01058	0.035542	0.978298	852	4	1.1472	4	NA
NFIC	6	0.0106	0.042066	0.978298	853	2	-0.067805	2	https://www.ncbi.nlm.nih.gov/gene/4782
hsa-mir-1207	3	0.010635	0.028424	0.976235	854	1	-1.9265	1	https://www.ncbi.nlm.nih.gov/gene/100302175
KIF20A	6	0.010636	0.042181	0.978298	855	5	1.3417	5	https://www.ncbi.nlm.nih.gov/gene/10112
HIGD1A	6	0.010637	0.042184	0.978298	856	4	0.97141	4	https://www.ncbi.nlm.nih.gov/gene/25994
hsa-mir-6859-1	4	0.010639	0.035737	0.978298	857	3	1.5651	3	https://www.ncbi.nlm.nih.gov/gene/102466751
LCE6A	6	0.010667	0.042278	0.978298	858	4	1.5275	4	https://www.ncbi.nlm.nih.gov/gene/448835
RNASEL	6	0.010687	0.042349	0.978298	859	3	0.44376	3	https://www.ncbi.nlm.nih.gov/gene/6041
BSDC1	6	0.010687	0.042349	0.978298	860	4	1.054	4	https://www.ncbi.nlm.nih.gov/gene/55108
FPR2	6	0.010697	0.042384	0.978298	861	5	1.2585	5	https://www.ncbi.nlm.nih.gov/gene/2358
CENPBD1	6	0.010701	0.042397	0.978298	862	3	0.32184	3	https://www.ncbi.nlm.nih.gov/gene/92806
SPACA7	6	0.010719	0.042464	0.978298	863	4	1.3373	4	https://www.ncbi.nlm.nih.gov/gene/122258
hsa-mir-4497	4	0.01072	0.035978	0.978298	864	3	1.5664	3	NA
G3BP2	6	0.01072	0.042466	0.978298	865	5	1.1399	5	https://www.ncbi.nlm.nih.gov/gene/9908
EIF3E	6	0.010747	0.042541	0.978298	866	5	1.249	5	https://www.ncbi.nlm.nih.gov/gene/3646
TAC4	6	0.010751	0.042555	0.978298	867	2	-0.18266	2	https://www.ncbi.nlm.nih.gov/gene/255061
NUCKS1	6	0.010781	0.042646	0.978298	868	3	0.96466	3	https://www.ncbi.nlm.nih.gov/gene/64710
LCMT1	6	0.010783	0.042652	0.978298	869	5	1.4507	5	https://www.ncbi.nlm.nih.gov/gene/51451
GABPA	6	0.010802	0.042716	0.978298	870	2	-0.80019	2	https://www.ncbi.nlm.nih.gov/gene/2551
LY9	6	0.010806	0.042731	0.978298	871	3	0.92495	3	https://www.ncbi.nlm.nih.gov/gene/4063
TULP2	6	0.010817	0.042766	0.978298	872	5	1.1316	5	https://www.ncbi.nlm.nih.gov/gene/7288
KRTAP21-1	6	0.010839	0.042841	0.978298	873	5	1.3902	5	https://www.ncbi.nlm.nih.gov/gene/337977
FAM46C	6	0.010852	0.042884	0.978298	874	2	-1.3873	2	https://www.ncbi.nlm.nih.gov/gene/54855
FAM134C	6	0.010861	0.042917	0.978298	875	3	0.85812	3	https://www.ncbi.nlm.nih.gov/gene/162427
PTGER1	6	0.010878	0.042972	0.978298	876	4	1.4192	4	https://www.ncbi.nlm.nih.gov/gene/5731
ANKDD1B	6	0.010884	0.04299	0.978298	877	5	1.4212	5	https://www.ncbi.nlm.nih.gov/gene/728780
GALNT9	6	0.010893	0.043019	0.978298	878	4	0.52012	4	https://www.ncbi.nlm.nih.gov/gene/50614
OR51A2	6	0.010895	0.043024	0.978298	879	4	1.4164	4	https://www.ncbi.nlm.nih.gov/gene/401667
AURKB	6	0.010903	0.043048	0.978298	880	2	-1.0866	2	https://www.ncbi.nlm.nih.gov/gene/9212
YWHAB	6	0.010917	0.043099	0.978298	881	4	1.439	4	https://www.ncbi.nlm.nih.gov/gene/7529
CLEC4C	6	0.010923	0.04312	0.978298	882	5	1.3231	5	https://www.ncbi.nlm.nih.gov/gene/170482
WDR90	6	0.010923	0.04312	0.978298	883	4	1.4238	4	https://www.ncbi.nlm.nih.gov/gene/197335
FBN3	6	0.010948	0.0432	0.978298	884	4	1.1681	4	https://www.ncbi.nlm.nih.gov/gene/84467
OTOS	6	0.01095	0.043206	0.978298	885	3	0.70424	3	https://www.ncbi.nlm.nih.gov/gene/150677
BEST4	6	0.010966	0.043261	0.978298	886	4	1.0604	4	https://www.ncbi.nlm.nih.gov/gene/266675
UNC45A	6	0.010978	0.043295	0.978298	887	4	0.85432	4	https://www.ncbi.nlm.nih.gov/gene/55898
USP17L15	6	0.011008	0.043409	0.978298	888	4	1.4624	4	https://www.ncbi.nlm.nih.gov/gene/100288520
hsa-mir-5787	4	0.011017	0.036919	0.978298	889	1	-1.439	1	https://www.ncbi.nlm.nih.gov/gene/102464817
IL20	6	0.011026	0.043472	0.978298	890	4	1.3595	4	https://www.ncbi.nlm.nih.gov/gene/50604
GPR176	6	0.011027	0.043476	0.978298	891	3	0.72528	3	https://www.ncbi.nlm.nih.gov/gene/11245
BTBD7	6	0.011054	0.043567	0.978298	892	3	-0.1899	3	https://www.ncbi.nlm.nih.gov/gene/55727
XIRP2	6	0.011054	0.043568	0.978298	893	3	0.98745	3	https://www.ncbi.nlm.nih.gov/gene/129446
hsa-mir-429	4	0.011072	0.037098	0.978298	894	4	0.97707	4	https://www.ncbi.nlm.nih.gov/gene/554210
C11orf21	6	0.011104	0.043734	0.978298	895	5	0.79691	5	https://www.ncbi.nlm.nih.gov/gene/29125
hsa-mir-4644	4	0.011118	0.037247	0.978298	896	2	-0.61569	2	NA
RINT1	6	0.011119	0.043789	0.978298	897	4	1.2821	4	https://www.ncbi.nlm.nih.gov/gene/60561
LRP5L	6	0.01118	0.04399	0.978298	898	5	1.5546	5	https://www.ncbi.nlm.nih.gov/gene/91355
PRAME	6	0.01118	0.043991	0.978298	899	4	1.0634	4	https://www.ncbi.nlm.nih.gov/gene/23532
PTMS	6	0.011205	0.044066	0.978298	900	2	-2.9027	2	https://www.ncbi.nlm.nih.gov/gene/5763
HIST1H3E	6	0.011206	0.044073	0.978298	901	4	1.4951	4	https://www.ncbi.nlm.nih.gov/gene/8353
MLF1IP	6	0.011229	0.044147	0.978298	902	5	1.0395	5	https://www.ncbi.nlm.nih.gov/gene/79682
hsa-mir-4533	4	0.011252	0.037662	0.978298	903	2	0.79478	2	NA
OR10J5	6	0.011255	0.044246	0.978298	904	1	-2.4674	1	https://www.ncbi.nlm.nih.gov/gene/127385
hsa-mir-378i	4	0.011261	0.037688	0.978298	905	3	1.6243	3	NA
XIAP	6	0.011264	0.044274	0.978298	906	4	0.84665	4	https://www.ncbi.nlm.nih.gov/gene/331
SORCS3	6	0.011275	0.044314	0.978298	907	5	0.9903	5	https://www.ncbi.nlm.nih.gov/gene/22986
MYOD1	5	0.011294	0.042686	0.978298	908	4	1.1293	4	https://www.ncbi.nlm.nih.gov/gene/4654
CLDN11	6	0.011313	0.044435	0.978298	909	4	1.6083	4	https://www.ncbi.nlm.nih.gov/gene/5010
PRL	6	0.011313	0.044435	0.978298	910	4	1.2905	4	https://www.ncbi.nlm.nih.gov/gene/5617
PAX6	6	0.011314	0.044437	0.978298	911	5	0.96803	5	https://www.ncbi.nlm.nih.gov/gene/5080
PPP2R1A	6	0.011319	0.044453	0.978298	912	3	0.13794	3	https://www.ncbi.nlm.nih.gov/gene/5518
C16orf59	6	0.011337	0.044506	0.978298	913	5	0.82957	5	https://www.ncbi.nlm.nih.gov/gene/80178
NGRN	6	0.011341	0.04452	0.978298	914	5	1.4002	5	https://www.ncbi.nlm.nih.gov/gene/51335
OASL	6	0.011353	0.044567	0.978298	915	4	1.3866	4	https://www.ncbi.nlm.nih.gov/gene/8638
QDPR	6	0.011364	0.044608	0.978298	916	2	-0.11376	2	https://www.ncbi.nlm.nih.gov/gene/5860
RPL39	6	0.011406	0.044743	0.978298	917	3	-0.81483	3	https://www.ncbi.nlm.nih.gov/gene/6170
C1orf95	6	0.011406	0.044743	0.978298	918	3	-0.013722	3	https://www.ncbi.nlm.nih.gov/gene/375057
ZDHHC20	6	0.011406	0.044743	0.978298	919	3	0.97816	3	https://www.ncbi.nlm.nih.gov/gene/253832
TXNDC12	6	0.011406	0.044743	0.978298	920	1	-0.56395	1	https://www.ncbi.nlm.nih.gov/gene/51060
FAM13C	6	0.011438	0.044835	0.978298	921	5	1.1534	5	https://www.ncbi.nlm.nih.gov/gene/220965
MMP21	6	0.011461	0.0449	0.978298	922	5	1.136	5	https://www.ncbi.nlm.nih.gov/gene/118856
TNFRSF18	6	0.011461	0.0449	0.978298	923	5	1.3054	5	https://www.ncbi.nlm.nih.gov/gene/8784
ZFP90	6	0.011461	0.0449	0.978298	924	5	1.3805	5	https://www.ncbi.nlm.nih.gov/gene/146198
KLHL4	6	0.011516	0.045077	0.978298	925	4	1.3	4	https://www.ncbi.nlm.nih.gov/gene/56062
GPR101	6	0.011556	0.045207	0.978298	926	5	1.1274	5	https://www.ncbi.nlm.nih.gov/gene/83550
C1orf123	6	0.011574	0.04527	0.978298	927	5	1.092	5	https://www.ncbi.nlm.nih.gov/gene/54987
TAF8	6	0.011575	0.045274	0.978298	928	3	-0.41558	3	https://www.ncbi.nlm.nih.gov/gene/129685
TBX10	6	0.011607	0.045391	0.978298	929	3	0.13568	3	https://www.ncbi.nlm.nih.gov/gene/347853
GPR151	6	0.011627	0.045452	0.978298	930	5	0.83552	5	https://www.ncbi.nlm.nih.gov/gene/134391
KIAA0319	6	0.011659	0.045556	0.978298	931	3	0.93195	3	https://www.ncbi.nlm.nih.gov/gene/9856
ST3GAL2	6	0.011663	0.045567	0.978298	932	2	0.0031357	2	https://www.ncbi.nlm.nih.gov/gene/6483
TAF2	6	0.01169	0.045645	0.978298	933	3	0.82815	3	https://www.ncbi.nlm.nih.gov/gene/6873
INTS8	6	0.011733	0.045795	0.978298	934	3	-1.7281	3	https://www.ncbi.nlm.nih.gov/gene/55656
FGF8	6	0.011733	0.045795	0.978298	935	4	1.0958	4	https://www.ncbi.nlm.nih.gov/gene/2253
SF3B4	6	0.011736	0.045803	0.978298	936	3	0.55158	3	https://www.ncbi.nlm.nih.gov/gene/10262
PCDHGC4	2	0.011786	0.022294	0.933075	937	2	1.6988	2	https://www.ncbi.nlm.nih.gov/gene/56098
DNAJA3	6	0.011808	0.04602	0.978298	938	4	1.4107	4	https://www.ncbi.nlm.nih.gov/gene/9093
CPB2	6	0.011809	0.04602	0.978298	939	3	-0.44133	3	https://www.ncbi.nlm.nih.gov/gene/1361
SMC2	6	0.011814	0.046037	0.978298	940	3	0.66797	3	https://www.ncbi.nlm.nih.gov/gene/10592
ZNF560	6	0.011818	0.046047	0.978298	941	4	1.2292	4	https://www.ncbi.nlm.nih.gov/gene/147741
CXADR	5	0.011824	0.044136	0.978298	942	1	0.26462	1	https://www.ncbi.nlm.nih.gov/gene/1525
ZBTB9	6	0.011834	0.046107	0.978298	943	4	1.2289	4	https://www.ncbi.nlm.nih.gov/gene/221504
TMEM123	6	0.011855	0.046182	0.978298	944	5	1.1752	5	https://www.ncbi.nlm.nih.gov/gene/114908
WAC	6	0.011859	0.046192	0.978298	945	2	-1.7692	2	https://www.ncbi.nlm.nih.gov/gene/51322
CXXC4	6	0.011871	0.046229	0.978298	946	5	1.0538	5	https://www.ncbi.nlm.nih.gov/gene/80319
NDUFAF6	6	0.0119	0.046323	0.978298	947	2	-1.5825	2	https://www.ncbi.nlm.nih.gov/gene/137682
MCUR1	6	0.011956	0.046502	0.978298	948	5	1.2388	5	https://www.ncbi.nlm.nih.gov/gene/63933
SLC47A1	6	0.011973	0.046562	0.978298	949	3	0.39155	3	https://www.ncbi.nlm.nih.gov/gene/55244
hsa-mir-6510	4	0.011974	0.039882	0.978298	950	3	1.3286	3	https://www.ncbi.nlm.nih.gov/gene/102466658
KRTAP1-1	5	0.011996	0.044622	0.978298	951	4	1.7066	4	https://www.ncbi.nlm.nih.gov/gene/81851
FKBP15	6	0.01202	0.04672	0.978298	952	4	1.1639	4	https://www.ncbi.nlm.nih.gov/gene/23307
KLC1	6	0.012035	0.046771	0.978298	953	3	0.54385	3	https://www.ncbi.nlm.nih.gov/gene/3831
ARL4A	6	0.012035	0.046771	0.978298	954	4	1.0034	3	https://www.ncbi.nlm.nih.gov/gene/10124
hsa-mir-342	4	0.012063	0.040152	0.978298	955	2	1.2274	2	https://www.ncbi.nlm.nih.gov/gene/442909
TST	6	0.012088	0.046946	0.978298	956	5	0.74943	5	https://www.ncbi.nlm.nih.gov/gene/7263
SVOP	6	0.012088	0.046946	0.978298	957	5	1.1056	5	https://www.ncbi.nlm.nih.gov/gene/55530
TBC1D22A	6	0.012097	0.046977	0.978298	958	4	1.2466	4	https://www.ncbi.nlm.nih.gov/gene/25771
ZNF544	6	0.012113	0.047028	0.978298	959	4	0.97765	4	https://www.ncbi.nlm.nih.gov/gene/27300
CLCN5	6	0.012143	0.047126	0.978298	960	4	0.61115	4	https://www.ncbi.nlm.nih.gov/gene/1184
UBE2M	6	0.012148	0.047144	0.978298	961	4	1.5255	4	https://www.ncbi.nlm.nih.gov/gene/9040
OXER1	6	0.012148	0.047144	0.978298	962	4	1.7186	4	https://www.ncbi.nlm.nih.gov/gene/165140
MICU2	6	0.012149	0.047147	0.978298	963	4	1.6265	4	https://www.ncbi.nlm.nih.gov/gene/221154
FGD3	5	0.012201	0.045184	0.978298	964	3	0.9298	3	https://www.ncbi.nlm.nih.gov/gene/89846
MB	6	0.012233	0.04742	0.978298	965	4	1.3037	4	https://www.ncbi.nlm.nih.gov/gene/4151
KCTD20	6	0.012266	0.047526	0.978298	966	5	0.98102	5	https://www.ncbi.nlm.nih.gov/gene/222658
CDKL3	6	0.012266	0.047526	0.978298	967	4	0.96802	4	https://www.ncbi.nlm.nih.gov/gene/51265
CHMP4A	5	0.012275	0.045389	0.978298	968	4	1.151	4	https://www.ncbi.nlm.nih.gov/gene/29082
LRSAM1	6	0.01228	0.047564	0.978298	969	5	1.5702	5	https://www.ncbi.nlm.nih.gov/gene/90678
PLAGL2	6	0.012309	0.047671	0.978298	970	4	1.2633	4	https://www.ncbi.nlm.nih.gov/gene/5326
RAB14	6	0.012325	0.04773	0.978298	971	4	1.2584	4	https://www.ncbi.nlm.nih.gov/gene/51552
CLDN2	6	0.012325	0.04773	0.978298	972	3	1.1991	3	https://www.ncbi.nlm.nih.gov/gene/9075
NDUFB9	6	0.012336	0.047764	0.978298	973	5	1.1903	5	https://www.ncbi.nlm.nih.gov/gene/4715
NEU3	6	0.012374	0.047886	0.978298	974	4	1.2941	4	https://www.ncbi.nlm.nih.gov/gene/10825
NDUFB4	6	0.012387	0.047937	0.978298	975	3	0.64073	3	https://www.ncbi.nlm.nih.gov/gene/4710
OR4C13	6	0.012387	0.047937	0.978298	976	3	0.41014	3	https://www.ncbi.nlm.nih.gov/gene/283092
PROZ	6	0.012387	0.047937	0.978298	977	3	0.60077	3	https://www.ncbi.nlm.nih.gov/gene/8858
LOC100130539	6	0.012387	0.047937	0.978298	978	3	0.48214	3	NA
PFKFB2	6	0.012387	0.047937	0.978298	979	3	0.44773	3	https://www.ncbi.nlm.nih.gov/gene/5208
CHST15	6	0.012387	0.047937	0.978298	980	1	-0.43407	1	https://www.ncbi.nlm.nih.gov/gene/51363
TMED9	6	0.012391	0.04795	0.978298	981	5	1.4883	5	https://www.ncbi.nlm.nih.gov/gene/54732
TINF2	6	0.012428	0.048078	0.978298	982	4	1.1223	4	https://www.ncbi.nlm.nih.gov/gene/26277
SLC25A33	6	0.012441	0.048123	0.978298	983	3	0.89911	3	https://www.ncbi.nlm.nih.gov/gene/84275
ZNF578	6	0.012467	0.048208	0.978298	984	4	1.0352	4	https://www.ncbi.nlm.nih.gov/gene/147660
UMPS	6	0.012468	0.048212	0.978298	985	4	1.3387	4	https://www.ncbi.nlm.nih.gov/gene/7372
MGEA5	6	0.01247	0.048218	0.978298	986	5	1.4514	5	https://www.ncbi.nlm.nih.gov/gene/10724
POU3F4	6	0.012502	0.048328	0.978298	987	3	0.59242	3	https://www.ncbi.nlm.nih.gov/gene/5456
FABP6	6	0.012515	0.048382	0.978298	988	5	1.036	5	https://www.ncbi.nlm.nih.gov/gene/2172
MXRA8	6	0.012533	0.048441	0.978298	989	5	1.405	5	https://www.ncbi.nlm.nih.gov/gene/54587
XCL2	3	0.012539	0.033187	0.978298	990	3	1.6077	3	https://www.ncbi.nlm.nih.gov/gene/6846
IRF6	6	0.01256	0.048529	0.978298	991	5	1.112	5	https://www.ncbi.nlm.nih.gov/gene/3664
TNNI3	5	0.012595	0.046254	0.978298	992	2	0.063981	2	https://www.ncbi.nlm.nih.gov/gene/7137
PRAMEF15	6	0.012597	0.048651	0.978298	993	5	0.84886	5	https://www.ncbi.nlm.nih.gov/gene/653619
hsa-mir-183	4	0.012598	0.041768	0.978298	994	4	1.0776	4	NA
ARID3B	6	0.012627	0.048754	0.978298	995	5	1.194	5	https://www.ncbi.nlm.nih.gov/gene/10620
SAR1A	6	0.012627	0.048754	0.978298	996	2	-1.0636	2	https://www.ncbi.nlm.nih.gov/gene/56681
ANKRD28	6	0.012636	0.048782	0.978298	997	4	1.3901	4	https://www.ncbi.nlm.nih.gov/gene/23243
CENPT	6	0.012664	0.048873	0.978298	998	3	0.38086	3	https://www.ncbi.nlm.nih.gov/gene/80152
CALML6	6	0.012727	0.049078	0.978298	999	5	1.0638	5	https://www.ncbi.nlm.nih.gov/gene/163688
KCNA6	6	0.012733	0.049097	0.978298	1000	3	0.88697	3	https://www.ncbi.nlm.nih.gov/gene/3742
KIAA1919	6	0.012736	0.049111	0.978298	1001	4	1.4145	4	https://www.ncbi.nlm.nih.gov/gene/91749
PDE9A	6	0.012764	0.049206	0.978298	1002	4	0.90274	4	https://www.ncbi.nlm.nih.gov/gene/5152
TRPM5	6	0.012764	0.049206	0.978298	1003	3	0.23884	3	https://www.ncbi.nlm.nih.gov/gene/29850
EFCAB4B	6	0.012764	0.049206	0.978298	1004	4	0.61437	4	https://www.ncbi.nlm.nih.gov/gene/84766
CHRNA9	6	0.012771	0.049226	0.978298	1005	5	0.78215	5	https://www.ncbi.nlm.nih.gov/gene/55584
ZNF836	6	0.012786	0.049278	0.978298	1006	3	0.92036	3	https://www.ncbi.nlm.nih.gov/gene/162962
TPRA1	6	0.012791	0.04929	0.978298	1007	5	0.95131	5	https://www.ncbi.nlm.nih.gov/gene/131601
PEBP1	6	0.012794	0.049298	0.978298	1008	4	0.80129	4	https://www.ncbi.nlm.nih.gov/gene/5037
hsa-mir-6825	4	0.012813	0.042445	0.978298	1009	2	0.50328	2	https://www.ncbi.nlm.nih.gov/gene/102466199
SLC25A5	6	0.012843	0.049479	0.978298	1010	3	1.0289	3	https://www.ncbi.nlm.nih.gov/gene/292
UNC13D	6	0.012865	0.049558	0.978298	1011	2	0.17622	2	https://www.ncbi.nlm.nih.gov/gene/201294
TOMM7	6	0.012904	0.049679	0.978298	1012	4	1.481	4	https://www.ncbi.nlm.nih.gov/gene/54543
DCLRE1A	6	0.012915	0.049726	0.978298	1013	3	-0.37197	3	https://www.ncbi.nlm.nih.gov/gene/9937
GFRA1	6	0.012945	0.049825	0.978298	1014	5	1.2837	5	https://www.ncbi.nlm.nih.gov/gene/2674
IGLL5	6	0.012951	0.049838	0.978298	1015	3	0.90928	3	https://www.ncbi.nlm.nih.gov/gene/100423062
AARD	6	0.012951	0.049838	0.978298	1016	4	1.5237	4	https://www.ncbi.nlm.nih.gov/gene/441376
SMC1B	6	0.012952	0.049845	0.978298	1017	4	1.5757	4	https://www.ncbi.nlm.nih.gov/gene/27127
hsa-mir-4316	4	0.012964	0.042905	0.978298	1018	2	-0.61456	2	NA
DNASE1L3	6	0.012966	0.049888	0.978298	1019	5	0.56571	5	https://www.ncbi.nlm.nih.gov/gene/1776
MSX2	6	0.013016	0.050053	0.978298	1020	4	0.93684	4	https://www.ncbi.nlm.nih.gov/gene/4488
hsa-mir-4748	4	0.013049	0.043155	0.978298	1021	4	1.6059	4	NA
TLL2	6	0.013069	0.050231	0.978298	1022	3	0.71986	3	https://www.ncbi.nlm.nih.gov/gene/7093
hsa-mir-4284	4	0.013106	0.043337	0.978298	1023	4	1.0364	4	NA
WDR13	6	0.013108	0.050354	0.978298	1024	5	1.0666	5	https://www.ncbi.nlm.nih.gov/gene/64743
GAR1	6	0.013116	0.05038	0.978298	1025	2	0.18762	2	https://www.ncbi.nlm.nih.gov/gene/54433
ABCA5	6	0.013131	0.050435	0.978298	1026	3	0.37339	3	https://www.ncbi.nlm.nih.gov/gene/23461
LRRC20	6	0.013154	0.050506	0.978298	1027	4	1.2213	4	https://www.ncbi.nlm.nih.gov/gene/55222
VWC2L	6	0.01322	0.050716	0.978298	1028	3	0.85128	3	https://www.ncbi.nlm.nih.gov/gene/402117
ZNF451	6	0.013235	0.050763	0.978298	1029	2	0.0049028	2	https://www.ncbi.nlm.nih.gov/gene/26036
CASP7	6	0.013242	0.050791	0.978298	1030	5	1.3847	5	https://www.ncbi.nlm.nih.gov/gene/840
WDR74	6	0.013294	0.050954	0.978298	1031	3	0.037819	3	https://www.ncbi.nlm.nih.gov/gene/54663
ASNA1	6	0.013317	0.051025	0.978298	1032	2	0.10139	2	https://www.ncbi.nlm.nih.gov/gene/439
MLYCD	6	0.013317	0.051025	0.978298	1033	3	0.19858	3	https://www.ncbi.nlm.nih.gov/gene/23417
OR51E1	6	0.013317	0.051025	0.978298	1034	2	-0.92323	2	https://www.ncbi.nlm.nih.gov/gene/143503
SMPD2	6	0.01334	0.051106	0.978298	1035	5	1.04	5	https://www.ncbi.nlm.nih.gov/gene/6610
NCF1	6	0.013359	0.05117	0.978298	1036	5	0.86359	5	https://www.ncbi.nlm.nih.gov/gene/653361
ART3	6	0.013375	0.051218	0.978298	1037	3	0.99631	3	https://www.ncbi.nlm.nih.gov/gene/419
BIRC2	4	0.013378	0.044164	0.978298	1038	4	1.3403	4	https://www.ncbi.nlm.nih.gov/gene/329
PIANP	6	0.013388	0.051266	0.978298	1039	4	1.5259	4	https://www.ncbi.nlm.nih.gov/gene/196500
R3HDML	6	0.013408	0.051332	0.978298	1040	5	1.4902	5	https://www.ncbi.nlm.nih.gov/gene/140902
NR4A1	6	0.013415	0.051359	0.978298	1041	5	1.054	5	https://www.ncbi.nlm.nih.gov/gene/3164
RAB23	6	0.013461	0.051512	0.978298	1042	3	1.0727	3	https://www.ncbi.nlm.nih.gov/gene/51715
SERPINF1	6	0.013462	0.051514	0.978298	1043	5	1.1676	5	https://www.ncbi.nlm.nih.gov/gene/5176
SMAD9	6	0.013474	0.051553	0.978298	1044	3	0.65505	3	https://www.ncbi.nlm.nih.gov/gene/4093
KRTAP10-6	6	0.013493	0.051618	0.978298	1045	2	-2.18	2	https://www.ncbi.nlm.nih.gov/gene/386674
GJC3	6	0.013503	0.051654	0.978298	1046	5	1.4411	5	https://www.ncbi.nlm.nih.gov/gene/349149
TBC1D20	6	0.013504	0.051658	0.978298	1047	5	1.0094	5	https://www.ncbi.nlm.nih.gov/gene/128637
HIST1H2AE	6	0.013509	0.051675	0.978298	1048	5	1.1832	5	https://www.ncbi.nlm.nih.gov/gene/3012
GTF3C4	6	0.013602	0.051983	0.978298	1049	3	0.9468	3	https://www.ncbi.nlm.nih.gov/gene/9329
MNF1	5	0.013602	0.04898	0.978298	1050	4	1.3773	4	https://www.ncbi.nlm.nih.gov/gene/84300
C6orf226	6	0.013611	0.05201	0.978298	1051	5	1.3395	5	https://www.ncbi.nlm.nih.gov/gene/441150
SYNGAP1	6	0.013611	0.05201	0.978298	1052	5	0.97789	5	https://www.ncbi.nlm.nih.gov/gene/8831
COA1	6	0.013618	0.052035	0.978298	1053	5	1.4642	5	https://www.ncbi.nlm.nih.gov/gene/55744
HEATR2	6	0.013619	0.052039	0.978298	1054	2	-0.28938	2	https://www.ncbi.nlm.nih.gov/gene/54919
LMAN1	6	0.013662	0.052189	0.978298	1055	5	1.5422	5	https://www.ncbi.nlm.nih.gov/gene/3998
RIMS3	6	0.013696	0.052308	0.978298	1056	4	1.3474	4	https://www.ncbi.nlm.nih.gov/gene/9783
NDN	6	0.013712	0.052356	0.978298	1057	4	1.2016	4	https://www.ncbi.nlm.nih.gov/gene/4692
PIGT	6	0.013719	0.052376	0.978298	1058	3	0.21636	3	https://www.ncbi.nlm.nih.gov/gene/51604
CFL1	6	0.013734	0.052419	0.978298	1059	5	0.88736	5	https://www.ncbi.nlm.nih.gov/gene/1072
hsa-mir-671	4	0.013736	0.045231	0.978298	1060	1	0.098421	1	https://www.ncbi.nlm.nih.gov/gene/768213
CCDC9	6	0.013742	0.052443	0.978298	1061	2	0.22173	2	https://www.ncbi.nlm.nih.gov/gene/26093
KIF19	6	0.013788	0.052592	0.978298	1062	3	0.57688	3	https://www.ncbi.nlm.nih.gov/gene/124602
HDAC3	6	0.01379	0.0526	0.978298	1063	4	1.2529	4	https://www.ncbi.nlm.nih.gov/gene/8841
TMEM52	6	0.013815	0.052679	0.978298	1064	5	1.3172	5	https://www.ncbi.nlm.nih.gov/gene/339456
SLC25A26	6	0.013902	0.052975	0.978298	1065	5	1.5319	5	https://www.ncbi.nlm.nih.gov/gene/115286
SLMAP	6	0.013909	0.052997	0.978298	1066	5	1.0414	5	https://www.ncbi.nlm.nih.gov/gene/7871
LATS2	6	0.013933	0.053084	0.978298	1067	4	1.5254	4	https://www.ncbi.nlm.nih.gov/gene/26524
SLC41A3	6	0.01396	0.053175	0.978298	1068	5	0.88872	5	https://www.ncbi.nlm.nih.gov/gene/54946
OXCT1	6	0.013971	0.053204	0.978298	1069	2	-0.29645	2	https://www.ncbi.nlm.nih.gov/gene/5019
XPOT	6	0.013971	0.053204	0.978298	1070	4	0.95487	4	https://www.ncbi.nlm.nih.gov/gene/11260
TNPO3	6	0.013971	0.053205	0.978298	1071	4	1.207	4	https://www.ncbi.nlm.nih.gov/gene/23534
hsa-mir-8060	3	0.013974	0.036793	0.978298	1072	1	-0.086851	1	https://www.ncbi.nlm.nih.gov/gene/102465864
hsa-mir-635	4	0.013997	0.046023	0.978298	1073	3	1.7652	3	https://www.ncbi.nlm.nih.gov/gene/693220
GUSB	6	0.014012	0.053342	0.978298	1074	4	1.3244	4	https://www.ncbi.nlm.nih.gov/gene/2990
ZNF195	6	0.014029	0.0534	0.978298	1075	4	1.2309	4	https://www.ncbi.nlm.nih.gov/gene/7748
PEPD	6	0.014033	0.053414	0.978298	1076	4	0.96575	4	https://www.ncbi.nlm.nih.gov/gene/5184
ADM2	6	0.014033	0.053414	0.978298	1077	3	-0.75096	3	https://www.ncbi.nlm.nih.gov/gene/79924
MOGAT2	6	0.014042	0.053442	0.978298	1078	5	1.0015	5	https://www.ncbi.nlm.nih.gov/gene/80168
CEACAM8	6	0.014047	0.053457	0.978298	1079	4	1.2314	4	https://www.ncbi.nlm.nih.gov/gene/1088
LIMCH1	6	0.014052	0.053473	0.978298	1080	5	1.1707	5	https://www.ncbi.nlm.nih.gov/gene/22998
GADD45B	5	0.014055	0.050224	0.978298	1081	4	1.1947	4	https://www.ncbi.nlm.nih.gov/gene/4616
KRTAP5-11	5	0.01407	0.050267	0.978298	1082	3	1.6128	3	https://www.ncbi.nlm.nih.gov/gene/440051
TNIP1	6	0.014071	0.053539	0.978298	1083	2	-2.2148	2	https://www.ncbi.nlm.nih.gov/gene/10318
CXCL16	6	0.014076	0.053556	0.978298	1084	3	1.0089	3	https://www.ncbi.nlm.nih.gov/gene/58191
hsa-mir-216b	4	0.014104	0.046335	0.978298	1085	2	0.96187	2	NA
SLC12A1	6	0.014121	0.053688	0.978298	1086	3	0.53014	3	https://www.ncbi.nlm.nih.gov/gene/6557
COLGALT1	6	0.014128	0.053709	0.978298	1087	4	1.3475	4	https://www.ncbi.nlm.nih.gov/gene/79709
GPSM3	6	0.014158	0.053805	0.978298	1088	3	0.70255	3	https://www.ncbi.nlm.nih.gov/gene/63940
BTBD8	6	0.014158	0.053805	0.978298	1089	3	0.99949	3	https://www.ncbi.nlm.nih.gov/gene/284697
ZNF528	6	0.01416	0.053811	0.978298	1090	5	1.2549	5	https://www.ncbi.nlm.nih.gov/gene/84436
FAM183A	6	0.01416	0.053811	0.978298	1091	5	1.0242	5	https://www.ncbi.nlm.nih.gov/gene/440585
DSCAML1	6	0.014247	0.054088	0.978298	1092	4	1.1628	4	https://www.ncbi.nlm.nih.gov/gene/57453
GLI3	6	0.014284	0.054204	0.978298	1093	3	0.97163	3	https://www.ncbi.nlm.nih.gov/gene/2737
TMPRSS6	6	0.014292	0.054236	0.978298	1094	3	0.92903	3	https://www.ncbi.nlm.nih.gov/gene/164656
OS9	6	0.014306	0.054286	0.978298	1095	5	1.195	5	https://www.ncbi.nlm.nih.gov/gene/10956
C8orf48	6	0.014306	0.054286	0.978298	1096	5	1.0537	5	https://www.ncbi.nlm.nih.gov/gene/157773
RBM15B	6	0.014313	0.054311	0.978298	1097	3	0.92286	3	https://www.ncbi.nlm.nih.gov/gene/29890
METAP1D	6	0.014316	0.054317	0.978298	1098	3	-1.2464	3	https://www.ncbi.nlm.nih.gov/gene/254042
OLFML1	6	0.014319	0.054327	0.978298	1099	5	0.75042	5	https://www.ncbi.nlm.nih.gov/gene/283298
URI1	6	0.014337	0.054385	0.978298	1100	4	1.3501	4	https://www.ncbi.nlm.nih.gov/gene/8725
MVP	6	0.014382	0.054527	0.978298	1101	5	0.9207	5	https://www.ncbi.nlm.nih.gov/gene/9961
WDR72	6	0.01441	0.054631	0.978298	1102	4	1.1507	4	https://www.ncbi.nlm.nih.gov/gene/256764
ARHGAP8	6	0.014437	0.054712	0.978298	1103	5	1.0313	5	https://www.ncbi.nlm.nih.gov/gene/23779
TMEM14C	6	0.014437	0.054712	0.978298	1104	5	1.2094	5	https://www.ncbi.nlm.nih.gov/gene/51522
SLCO5A1	6	0.014472	0.054819	0.978298	1105	4	1.0188	4	https://www.ncbi.nlm.nih.gov/gene/81796
NonTargetingControlGuideForHuman_0526	1	0.01448	0.014388	0.927682	1106	1	2.6879	1	NA
SCNN1B	6	0.014483	0.054848	0.978298	1107	5	0.87479	5	https://www.ncbi.nlm.nih.gov/gene/6338
EMX2	6	0.014485	0.054854	0.978298	1108	4	0.64123	4	https://www.ncbi.nlm.nih.gov/gene/2018
hsa-mir-611	4	0.014507	0.047598	0.978298	1109	2	0.90863	2	https://www.ncbi.nlm.nih.gov/gene/693196
ALDH3A2	6	0.01451	0.054937	0.978298	1110	5	1.1253	5	https://www.ncbi.nlm.nih.gov/gene/224
PRPF38B	6	0.014521	0.054967	0.978298	1111	3	0.77742	3	https://www.ncbi.nlm.nih.gov/gene/55119
MMP12	6	0.014544	0.055042	0.978298	1112	5	0.89986	5	https://www.ncbi.nlm.nih.gov/gene/4321
NAV1	6	0.014556	0.055083	0.978298	1113	4	1.4984	4	https://www.ncbi.nlm.nih.gov/gene/89796
PCDHGA1	6	0.014561	0.055102	0.978298	1114	5	0.61281	5	https://www.ncbi.nlm.nih.gov/gene/56114
EMC8	6	0.014563	0.055107	0.978298	1115	5	0.76025	5	https://www.ncbi.nlm.nih.gov/gene/10328
ZBTB3	6	0.014583	0.055164	0.978298	1116	5	1.3702	5	https://www.ncbi.nlm.nih.gov/gene/79842
MPC2	6	0.014594	0.055194	0.978298	1117	4	1.1563	4	https://www.ncbi.nlm.nih.gov/gene/25874
LPA	6	0.014597	0.055206	0.978298	1118	4	1.2051	4	https://www.ncbi.nlm.nih.gov/gene/4018
DBP	6	0.014623	0.055293	0.978298	1119	2	-2.2269	2	https://www.ncbi.nlm.nih.gov/gene/1628
HOXC8	6	0.014623	0.055293	0.978298	1120	4	1.2791	4	https://www.ncbi.nlm.nih.gov/gene/3224
ARL2	6	0.014623	0.055293	0.978298	1121	2	0.15507	2	https://www.ncbi.nlm.nih.gov/gene/402
SCAMP3	6	0.014623	0.055293	0.978298	1122	1	-3.119	1	https://www.ncbi.nlm.nih.gov/gene/10067
AHSA1	6	0.014623	0.055293	0.978298	1123	3	0.0075088	3	https://www.ncbi.nlm.nih.gov/gene/10598
CTAGE1	6	0.014623	0.055293	0.978298	1124	2	-0.39664	2	https://www.ncbi.nlm.nih.gov/gene/64693
PABPC4	6	0.014623	0.055293	0.978298	1125	3	0.41862	3	https://www.ncbi.nlm.nih.gov/gene/8761
IGFBPL1	6	0.014628	0.055307	0.978298	1126	5	1.1155	5	https://www.ncbi.nlm.nih.gov/gene/347252
PPP1R3C	6	0.014632	0.055322	0.978298	1127	5	0.73145	5	https://www.ncbi.nlm.nih.gov/gene/5507
PROC	6	0.014638	0.055342	0.978298	1128	5	1.3589	5	https://www.ncbi.nlm.nih.gov/gene/5624
DNTT	6	0.014665	0.055441	0.978298	1129	4	1.1172	4	https://www.ncbi.nlm.nih.gov/gene/1791
hsa-mir-222	4	0.014674	0.048111	0.978298	1130	3	1.4203	3	NA
ISY1-RAB43	1	0.014692	0.014604	0.927682	1131	1	3.2266	1	https://www.ncbi.nlm.nih.gov/gene/100534599
ERMN	6	0.014692	0.055526	0.978298	1132	3	1.1427	3	https://www.ncbi.nlm.nih.gov/gene/57471
WIF1	6	0.014698	0.05555	0.978298	1133	4	1.0206	4	https://www.ncbi.nlm.nih.gov/gene/11197
GMPR	6	0.014699	0.055557	0.978298	1134	5	0.86282	5	https://www.ncbi.nlm.nih.gov/gene/2766
MSH6	6	0.014753	0.055725	0.978298	1135	4	1.3365	4	https://www.ncbi.nlm.nih.gov/gene/2956
SMOX	6	0.014776	0.055785	0.978298	1136	4	1.1856	4	https://www.ncbi.nlm.nih.gov/gene/54498
MID1	6	0.014777	0.055788	0.978298	1137	5	1.2264	5	https://www.ncbi.nlm.nih.gov/gene/4281
GPR27	6	0.014842	0.055991	0.978298	1138	5	1.0794	5	https://www.ncbi.nlm.nih.gov/gene/2850
NOL3	6	0.014842	0.055991	0.978298	1139	5	0.9513	5	https://www.ncbi.nlm.nih.gov/gene/8996
CST3	6	0.014842	0.055991	0.978298	1140	5	0.89945	5	https://www.ncbi.nlm.nih.gov/gene/1471
RLIM	6	0.014874	0.056097	0.978298	1141	2	-2.3766	2	https://www.ncbi.nlm.nih.gov/gene/51132
ALG6	6	0.014887	0.056137	0.978298	1142	5	0.95282	5	https://www.ncbi.nlm.nih.gov/gene/29929
C12orf45	6	0.014892	0.056158	0.978298	1143	4	0.91257	4	https://www.ncbi.nlm.nih.gov/gene/121053
ADH1B	6	0.014894	0.056163	0.978298	1144	5	0.96679	5	https://www.ncbi.nlm.nih.gov/gene/125
ZNF592	6	0.01491	0.056216	0.978298	1145	4	1.2714	4	https://www.ncbi.nlm.nih.gov/gene/9640
DPEP3	6	0.014922	0.056248	0.978298	1146	3	0.27689	3	https://www.ncbi.nlm.nih.gov/gene/64180
CCNG2	6	0.014925	0.05626	0.978298	1147	4	1.1864	4	https://www.ncbi.nlm.nih.gov/gene/901
PRSS55	4	0.014929	0.048915	0.978298	1148	4	0.88627	4	https://www.ncbi.nlm.nih.gov/gene/203074
OR4M1	6	0.01494	0.056305	0.978298	1149	4	1.4188	4	https://www.ncbi.nlm.nih.gov/gene/441670
HBE1	6	0.01496	0.056365	0.978298	1150	5	1.3804	5	https://www.ncbi.nlm.nih.gov/gene/3046
TRO	6	0.014964	0.056373	0.978298	1151	4	1.1683	4	https://www.ncbi.nlm.nih.gov/gene/7216
ZFP37	6	0.014974	0.056408	0.978298	1152	3	0.7475	3	https://www.ncbi.nlm.nih.gov/gene/7539
LCE1F	6	0.014993	0.056467	0.978298	1153	5	1.5828	5	https://www.ncbi.nlm.nih.gov/gene/353137
UVSSA	6	0.014995	0.056473	0.978298	1154	5	1.0674	5	https://www.ncbi.nlm.nih.gov/gene/57654
MPO	6	0.014996	0.056475	0.978298	1155	4	1.41	4	https://www.ncbi.nlm.nih.gov/gene/4353
C1orf106	6	0.014996	0.056475	0.978298	1156	4	1.4172	4	https://www.ncbi.nlm.nih.gov/gene/55765
SETBP1	6	0.015021	0.05656	0.978298	1157	3	-0.7945	3	https://www.ncbi.nlm.nih.gov/gene/26040
BDP1	6	0.015021	0.05656	0.978298	1158	4	1.1875	4	https://www.ncbi.nlm.nih.gov/gene/55814
PPIE	6	0.015023	0.05657	0.978298	1159	5	1.3456	5	https://www.ncbi.nlm.nih.gov/gene/10450
NonTargetingControlGuideForHuman_0695	1	0.015035	0.014946	0.927682	1160	1	3.026	1	NA
PRR9	6	0.015043	0.056633	0.978298	1161	5	0.87935	5	https://www.ncbi.nlm.nih.gov/gene/574414
ABI2	6	0.01505	0.056649	0.978298	1162	3	-0.80227	3	https://www.ncbi.nlm.nih.gov/gene/10152
TAS2R3	6	0.01505	0.056649	0.978298	1163	3	0.19926	3	https://www.ncbi.nlm.nih.gov/gene/50831
BIK	6	0.01505	0.056649	0.978298	1164	3	-0.081707	3	https://www.ncbi.nlm.nih.gov/gene/638
YWHAZ	6	0.01505	0.056649	0.978298	1165	1	-0.41931	1	https://www.ncbi.nlm.nih.gov/gene/7534
hsa-mir-3941	4	0.015053	0.049299	0.978298	1166	4	1.6859	4	NA
KRT80	6	0.015062	0.056685	0.978298	1167	5	1.2858	5	https://www.ncbi.nlm.nih.gov/gene/144501
EFR3B	5	0.015065	0.053017	0.978298	1168	3	1.8421	3	https://www.ncbi.nlm.nih.gov/gene/22979
GALE	6	0.015109	0.056839	0.978298	1169	4	1.0865	4	https://www.ncbi.nlm.nih.gov/gene/2582
GNRH1	5	0.015118	0.053165	0.978298	1170	2	0.40662	2	https://www.ncbi.nlm.nih.gov/gene/2796
LENG9	6	0.015133	0.056919	0.978298	1171	5	1.0479	5	https://www.ncbi.nlm.nih.gov/gene/94059
RDH13	6	0.015144	0.056963	0.978298	1172	5	1.2376	5	https://www.ncbi.nlm.nih.gov/gene/112724
NAPEPLD	6	0.015146	0.05697	0.978298	1173	5	1.0767	5	https://www.ncbi.nlm.nih.gov/gene/222236
FAM157A	6	0.015159	0.057006	0.978298	1174	4	1.4702	4	https://www.ncbi.nlm.nih.gov/gene/728262
SFTA2	6	0.015176	0.057056	0.978298	1175	4	0.64202	4	https://www.ncbi.nlm.nih.gov/gene/389376
ZNF260	6	0.015213	0.057181	0.978298	1176	3	0.43367	3	https://www.ncbi.nlm.nih.gov/gene/339324
BEX2	6	0.015226	0.057223	0.978298	1177	3	0.37643	3	https://www.ncbi.nlm.nih.gov/gene/84707
hsa-mir-378a	4	0.015244	0.049861	0.978298	1178	3	1.2947	3	https://www.ncbi.nlm.nih.gov/gene/494327
MYOM1	6	0.015257	0.057317	0.978298	1179	3	0.95335	3	https://www.ncbi.nlm.nih.gov/gene/8736
EEFSEC	5	0.015259	0.053552	0.978298	1180	2	0.035123	2	https://www.ncbi.nlm.nih.gov/gene/60678
CAPZB	6	0.015279	0.0574	0.978298	1181	5	1.3575	5	https://www.ncbi.nlm.nih.gov/gene/832
UBAP1	6	0.015298	0.057455	0.978298	1182	2	-2.5979	2	https://www.ncbi.nlm.nih.gov/gene/51271
ABHD1	6	0.015303	0.057472	0.978298	1183	5	1.1731	5	https://www.ncbi.nlm.nih.gov/gene/84696
hsa-mir-4437	4	0.015307	0.050045	0.978298	1184	4	1.3971	4	NA
RAB6A	6	0.015311	0.057499	0.978298	1185	3	0.69997	3	https://www.ncbi.nlm.nih.gov/gene/5870
TCEANC2	6	0.015326	0.057543	0.978298	1186	1	-0.65713	1	https://www.ncbi.nlm.nih.gov/gene/127428
TRPM6	6	0.015326	0.057543	0.978298	1187	4	0.78478	4	https://www.ncbi.nlm.nih.gov/gene/140803
STEAP4	6	0.015326	0.057543	0.978298	1188	2	-0.0045671	2	https://www.ncbi.nlm.nih.gov/gene/79689
DCAF11	6	0.015356	0.057643	0.978298	1189	4	1.1101	4	https://www.ncbi.nlm.nih.gov/gene/80344
TNNI3K	5	0.015363	0.053842	0.978298	1190	3	0.62362	3	https://www.ncbi.nlm.nih.gov/gene/51086
hsa-mir-6500	4	0.015379	0.050256	0.978298	1191	4	1.5735	4	https://www.ncbi.nlm.nih.gov/gene/102466656
KCND2	6	0.015426	0.05789	0.978298	1192	3	0.43959	3	https://www.ncbi.nlm.nih.gov/gene/3751
ARMC12	6	0.01543	0.057896	0.978298	1193	4	1.3808	4	https://www.ncbi.nlm.nih.gov/gene/221481
ST6GAL2	6	0.015464	0.057992	0.978298	1194	5	1.0208	5	https://www.ncbi.nlm.nih.gov/gene/84620
hsa-mir-3689d-2	4	0.015467	0.050521	0.978298	1195	4	1.2598	4	NA
CYP2E1	6	0.015527	0.058204	0.978298	1196	2	-0.19059	2	https://www.ncbi.nlm.nih.gov/gene/1571
MRPL43	6	0.015527	0.058204	0.978298	1197	2	0.11674	2	https://www.ncbi.nlm.nih.gov/gene/84545
SCGB1D2	6	0.01553	0.05822	0.978298	1198	4	1.3997	4	https://www.ncbi.nlm.nih.gov/gene/10647
PSMB9	6	0.015569	0.058352	0.978298	1199	5	0.77723	5	https://www.ncbi.nlm.nih.gov/gene/5698
AHR	6	0.015575	0.058374	0.978298	1200	5	1.2104	5	https://www.ncbi.nlm.nih.gov/gene/196
WNT2	6	0.015576	0.058377	0.978298	1201	4	1.3802	4	https://www.ncbi.nlm.nih.gov/gene/7472
hsa-mir-4739	4	0.015576	0.050844	0.978298	1202	3	1.9251	3	NA
CSRNP3	6	0.015582	0.058395	0.978298	1203	4	1.3576	4	https://www.ncbi.nlm.nih.gov/gene/80034
HPS4	6	0.015584	0.058401	0.978298	1204	4	1.0909	4	https://www.ncbi.nlm.nih.gov/gene/89781
DNPEP	6	0.015608	0.058484	0.978298	1205	4	1.4635	4	https://www.ncbi.nlm.nih.gov/gene/23549
hsa-mir-606	4	0.015629	0.051007	0.978298	1206	2	0.37227	2	https://www.ncbi.nlm.nih.gov/gene/693191
RNF213	6	0.015643	0.058609	0.978298	1207	5	1.2768	5	https://www.ncbi.nlm.nih.gov/gene/57674
APOA1BP	6	0.015652	0.05864	0.978298	1208	4	0.52019	4	https://www.ncbi.nlm.nih.gov/gene/128240
NEUROG3	6	0.015677	0.058732	0.978298	1209	3	0.87998	3	https://www.ncbi.nlm.nih.gov/gene/50674
DHX9	5	0.015696	0.05478	0.978298	1210	2	-0.023621	2	https://www.ncbi.nlm.nih.gov/gene/1660
USP5	5	0.015711	0.05482	0.978298	1211	3	1.4576	3	https://www.ncbi.nlm.nih.gov/gene/8078
ADPGK	6	0.015713	0.058845	0.978298	1212	5	1.0817	5	https://www.ncbi.nlm.nih.gov/gene/83440
P4HTM	6	0.015727	0.058891	0.978298	1213	4	0.92048	4	https://www.ncbi.nlm.nih.gov/gene/54681
LMNB2	6	0.015751	0.058976	0.978298	1214	4	1.3566	4	https://www.ncbi.nlm.nih.gov/gene/84823
SOX21	4	0.015755	0.051385	0.978298	1215	3	1.4447	3	https://www.ncbi.nlm.nih.gov/gene/11166
TMPPE	6	0.015776	0.059057	0.978298	1216	3	-0.55907	3	https://www.ncbi.nlm.nih.gov/gene/643853
TMEM14B	6	0.015828	0.059226	0.978298	1217	2	-0.10887	2	https://www.ncbi.nlm.nih.gov/gene/81853
PPP3CB	5	0.015828	0.055132	0.978298	1218	3	1.3735	3	https://www.ncbi.nlm.nih.gov/gene/5532
hsa-mir-6859-2	2	0.015853	0.02972	0.978298	1219	1	0.74027	1	https://www.ncbi.nlm.nih.gov/gene/102465909
ANKRD62	6	0.015876	0.059372	0.978298	1220	5	0.94675	5	https://www.ncbi.nlm.nih.gov/gene/342850
ZNF691	6	0.015899	0.05945	0.978298	1221	2	-0.80438	2	https://www.ncbi.nlm.nih.gov/gene/51058
CASQ2	6	0.015926	0.059543	0.978298	1222	2	-0.77127	2	https://www.ncbi.nlm.nih.gov/gene/845
KIAA0226L	6	0.015946	0.059598	0.978298	1223	3	0.86807	3	https://www.ncbi.nlm.nih.gov/gene/80183
NFKB1	6	0.015953	0.05962	0.978298	1224	3	0.64051	3	https://www.ncbi.nlm.nih.gov/gene/4790
LCE3B	6	0.015953	0.05962	0.978298	1225	4	0.82863	4	https://www.ncbi.nlm.nih.gov/gene/353143
DRD1	6	0.015963	0.059654	0.978298	1226	3	1.0259	3	https://www.ncbi.nlm.nih.gov/gene/1812
ZNF48	6	0.015967	0.059664	0.978298	1227	2	-0.015847	2	https://www.ncbi.nlm.nih.gov/gene/197407
ERVW-1	6	0.015967	0.059664	0.978298	1228	3	0.58965	3	https://www.ncbi.nlm.nih.gov/gene/30816
MTL5	6	0.015983	0.059712	0.978298	1229	5	0.90476	5	https://www.ncbi.nlm.nih.gov/gene/9633
TMEM169	6	0.015993	0.059745	0.978298	1230	4	1.2362	4	https://www.ncbi.nlm.nih.gov/gene/92691
STK11IP	6	0.016017	0.059818	0.978298	1231	4	1.358	4	https://www.ncbi.nlm.nih.gov/gene/114790
CSDE1	6	0.016042	0.059888	0.978298	1232	5	1.3855	5	https://www.ncbi.nlm.nih.gov/gene/7812
TMEM134	6	0.016046	0.059901	0.978298	1233	4	1.0858	4	https://www.ncbi.nlm.nih.gov/gene/80194
hsa-mir-6127	2	0.016055	0.030078	0.978298	1234	1	-0.1784	1	https://www.ncbi.nlm.nih.gov/gene/102466615
TBRG4	6	0.016078	0.06	0.978298	1235	2	-0.11084	2	https://www.ncbi.nlm.nih.gov/gene/9238
hsa-mir-1306	4	0.016081	0.052407	0.978298	1236	1	-0.011138	1	https://www.ncbi.nlm.nih.gov/gene/100302197
SERTM1	6	0.016111	0.0601	0.978298	1237	2	-1.1055	2	https://www.ncbi.nlm.nih.gov/gene/400120
VMAC	6	0.016129	0.060163	0.978298	1238	4	0.81104	4	https://www.ncbi.nlm.nih.gov/gene/400673
C8A	6	0.016156	0.06025	0.978298	1239	5	0.77364	5	https://www.ncbi.nlm.nih.gov/gene/731
FBXO9	6	0.016159	0.060264	0.978298	1240	5	1.1453	5	https://www.ncbi.nlm.nih.gov/gene/26268
SCRT2	5	0.016168	0.056069	0.978298	1241	2	-0.10336	2	https://www.ncbi.nlm.nih.gov/gene/85508
OAS1	6	0.016204	0.060395	0.978298	1242	3	0.41126	3	https://www.ncbi.nlm.nih.gov/gene/4938
RPRD2	6	0.016204	0.060395	0.978298	1243	2	-0.47682	2	https://www.ncbi.nlm.nih.gov/gene/23248
SAMD12	6	0.016204	0.060395	0.978298	1244	4	1.5989	4	https://www.ncbi.nlm.nih.gov/gene/401474
SERINC4	6	0.016219	0.060445	0.978298	1245	4	1.2821	4	https://www.ncbi.nlm.nih.gov/gene/619189
THAP3	6	0.01622	0.060448	0.978298	1246	5	1.0348	5	https://www.ncbi.nlm.nih.gov/gene/90326
IGDCC4	6	0.016225	0.060463	0.978298	1247	4	1.1142	4	https://www.ncbi.nlm.nih.gov/gene/57722
hsa-mir-8089	4	0.016248	0.052911	0.978298	1248	1	0.23263	1	https://www.ncbi.nlm.nih.gov/gene/102465882
ZER1	6	0.016279	0.060641	0.978298	1249	3	0.030859	3	https://www.ncbi.nlm.nih.gov/gene/10444
PPM1K	6	0.016306	0.060714	0.978298	1250	4	1.215	4	https://www.ncbi.nlm.nih.gov/gene/152926
hsa-mir-3690-1	4	0.016316	0.053116	0.978298	1251	3	1.3388	3	https://www.ncbi.nlm.nih.gov/gene/100500894
FGF18	6	0.016329	0.060796	0.978298	1252	2	0.085767	2	https://www.ncbi.nlm.nih.gov/gene/8817
NCSTN	6	0.016399	0.061014	0.978298	1253	5	1.36	5	https://www.ncbi.nlm.nih.gov/gene/23385
CDKN2B	6	0.016431	0.061113	0.978298	1254	5	1.3511	5	https://www.ncbi.nlm.nih.gov/gene/1030
hsa-mir-7152	4	0.01644	0.053484	0.978298	1255	4	0.83317	4	https://www.ncbi.nlm.nih.gov/gene/102465689
NCKIPSD	6	0.016455	0.061194	0.978298	1256	4	1.409	4	https://www.ncbi.nlm.nih.gov/gene/51517
NAA10	6	0.016476	0.061267	0.978298	1257	5	1.0012	5	https://www.ncbi.nlm.nih.gov/gene/8260
IMP4	6	0.01648	0.061275	0.978298	1258	3	0.21337	3	https://www.ncbi.nlm.nih.gov/gene/92856
DUSP16	6	0.01648	0.061275	0.978298	1259	2	-0.4533	2	https://www.ncbi.nlm.nih.gov/gene/80824
ZNHIT2	6	0.01648	0.061275	0.978298	1260	2	0.047831	2	https://www.ncbi.nlm.nih.gov/gene/741
PDCD4	6	0.016485	0.061294	0.978298	1261	4	1.4203	4	https://www.ncbi.nlm.nih.gov/gene/27250
CRYGA	6	0.016519	0.061401	0.978298	1262	3	0.85454	3	https://www.ncbi.nlm.nih.gov/gene/1418
CECR1	6	0.016519	0.061401	0.978298	1263	3	0.30507	3	https://www.ncbi.nlm.nih.gov/gene/51816
TTLL11	6	0.016522	0.061412	0.978298	1264	5	0.91507	5	https://www.ncbi.nlm.nih.gov/gene/158135
AGBL2	6	0.01655	0.061506	0.978298	1265	5	0.96258	5	https://www.ncbi.nlm.nih.gov/gene/79841
PARD3	5	0.016566	0.057202	0.978298	1266	4	1.6817	4	https://www.ncbi.nlm.nih.gov/gene/56288
ONECUT2	6	0.016588	0.061639	0.978298	1267	3	0.74188	3	https://www.ncbi.nlm.nih.gov/gene/9480
XPO1	6	0.016609	0.061705	0.978298	1268	3	1.0217	3	https://www.ncbi.nlm.nih.gov/gene/7514
CKAP2L	6	0.016615	0.061726	0.978298	1269	3	-0.27334	3	https://www.ncbi.nlm.nih.gov/gene/150468
EPHX1	6	0.016657	0.061882	0.978298	1270	5	0.8059	5	https://www.ncbi.nlm.nih.gov/gene/2052
C7orf25	6	0.016671	0.061918	0.978298	1271	5	1.1642	5	https://www.ncbi.nlm.nih.gov/gene/79020
ISM2	6	0.016674	0.061922	0.978298	1272	4	1.2186	4	https://www.ncbi.nlm.nih.gov/gene/145501
ERICH1	6	0.016698	0.061996	0.978298	1273	4	1.1902	4	https://www.ncbi.nlm.nih.gov/gene/157697
DPRX	6	0.01673	0.062103	0.978298	1274	1	-2.1415	1	https://www.ncbi.nlm.nih.gov/gene/503834
PIGQ	6	0.01673	0.062104	0.978298	1275	3	0.27808	3	https://www.ncbi.nlm.nih.gov/gene/9091
INTS12	6	0.01673	0.062104	0.978298	1276	4	1.4245	4	https://www.ncbi.nlm.nih.gov/gene/57117
RPGRIP1L	6	0.016758	0.06219	0.978298	1277	5	1.19	5	https://www.ncbi.nlm.nih.gov/gene/23322
BRPF1	5	0.01676	0.057733	0.978298	1278	4	1.2171	3	https://www.ncbi.nlm.nih.gov/gene/7862
RBM33	6	0.016761	0.062201	0.978298	1279	5	0.80126	5	https://www.ncbi.nlm.nih.gov/gene/155435
CHRNB2	6	0.016781	0.062263	0.978298	1280	4	1.1113	4	https://www.ncbi.nlm.nih.gov/gene/1141
SPNS1	6	0.016788	0.062284	0.978298	1281	2	-0.57078	2	https://www.ncbi.nlm.nih.gov/gene/83985
MANSC4	6	0.016826	0.062401	0.978298	1282	5	0.78948	5	https://www.ncbi.nlm.nih.gov/gene/100287284
KIF24	6	0.01685	0.062481	0.978298	1283	3	0.48807	3	https://www.ncbi.nlm.nih.gov/gene/347240
PTPRB	6	0.016859	0.062512	0.978298	1284	4	1.449	4	https://www.ncbi.nlm.nih.gov/gene/5787
PTRF	6	0.016867	0.062537	0.978298	1285	4	1.1628	4	https://www.ncbi.nlm.nih.gov/gene/284119
PIGM	6	0.016868	0.06254	0.978298	1286	5	0.81322	5	https://www.ncbi.nlm.nih.gov/gene/93183
GPR128	6	0.016873	0.062561	0.978298	1287	4	1.1092	4	https://www.ncbi.nlm.nih.gov/gene/84873
C9orf64	6	0.01688	0.062588	0.978298	1288	3	0.42037	3	https://www.ncbi.nlm.nih.gov/gene/84267
RIPPLY2	6	0.016902	0.062651	0.978298	1289	4	1.4046	4	https://www.ncbi.nlm.nih.gov/gene/134701
GZMM	6	0.016902	0.062651	0.978298	1290	3	0.39796	3	https://www.ncbi.nlm.nih.gov/gene/3004
SH2D4B	6	0.016904	0.062657	0.978298	1291	5	1.1963	5	https://www.ncbi.nlm.nih.gov/gene/387694
NonTargetingControlGuideForHuman_0179	1	0.01692	0.016885	0.927682	1292	1	2.6841	1	NA
GOLGA8A	5	0.016931	0.058193	0.978298	1293	4	1.3412	4	https://www.ncbi.nlm.nih.gov/gene/23015
hsa-mir-8083	4	0.016956	0.055033	0.978298	1294	2	-0.56519	2	https://www.ncbi.nlm.nih.gov/gene/102466879
MLF1	6	0.016981	0.062883	0.978298	1295	3	-0.26467	3	https://www.ncbi.nlm.nih.gov/gene/4291
hsa-mir-3925	4	0.017001	0.055172	0.978298	1296	1	-2.4202	1	NA
TRIM49D1	3	0.017008	0.044245	0.978298	1297	3	1.1121	3	https://www.ncbi.nlm.nih.gov/gene/399939
DSCR4	6	0.017052	0.063113	0.978298	1298	2	-1.1799	2	https://www.ncbi.nlm.nih.gov/gene/10281
DEF8	6	0.017056	0.063125	0.978298	1299	4	0.889	4	https://www.ncbi.nlm.nih.gov/gene/54849
ENO1	6	0.017056	0.063125	0.978298	1300	2	-1.5381	2	https://www.ncbi.nlm.nih.gov/gene/2023
KIAA1211	6	0.017064	0.063153	0.978298	1301	4	1.4976	4	https://www.ncbi.nlm.nih.gov/gene/57482
L3MBTL1	6	0.017064	0.063153	0.978298	1302	4	1.1155	4	https://www.ncbi.nlm.nih.gov/gene/26013
ARGLU1	5	0.017098	0.05863	0.978298	1303	2	-1.2385	2	https://www.ncbi.nlm.nih.gov/gene/55082
hsa-mir-6088	3	0.017111	0.044498	0.978298	1304	3	1.3646	3	https://www.ncbi.nlm.nih.gov/gene/102464836
hsa-mir-4633	4	0.017155	0.055638	0.978298	1305	4	1.3122	4	NA
NCR2	6	0.017157	0.063454	0.978298	1306	4	1.2904	4	https://www.ncbi.nlm.nih.gov/gene/9436
SIGLEC11	6	0.017157	0.063454	0.978298	1307	4	1.4068	4	https://www.ncbi.nlm.nih.gov/gene/114132
C7orf57	6	0.01719	0.063545	0.978298	1308	3	0.83639	3	https://www.ncbi.nlm.nih.gov/gene/136288
FRS3	6	0.017196	0.063561	0.978298	1309	2	-0.88815	2	https://www.ncbi.nlm.nih.gov/gene/10817
CPEB2	6	0.017223	0.063646	0.978298	1310	5	1.1261	5	https://www.ncbi.nlm.nih.gov/gene/132864
GATA3	6	0.017231	0.06367	0.978298	1311	3	0.2903	3	https://www.ncbi.nlm.nih.gov/gene/2625
GRAMD1C	6	0.017231	0.06367	0.978298	1312	3	0.60601	3	https://www.ncbi.nlm.nih.gov/gene/54762
NPRL3	6	0.017231	0.06367	0.978298	1313	2	-3.6652	2	https://www.ncbi.nlm.nih.gov/gene/8131
MOG	6	0.017231	0.06367	0.978298	1314	3	0.55734	3	https://www.ncbi.nlm.nih.gov/gene/4340
STAC	6	0.017231	0.06367	0.978298	1315	2	-0.72275	2	https://www.ncbi.nlm.nih.gov/gene/6769
PODXL2	6	0.017272	0.063806	0.978298	1316	3	0.94705	3	https://www.ncbi.nlm.nih.gov/gene/50512
PARD6B	6	0.017288	0.063855	0.978298	1317	3	0.91179	3	https://www.ncbi.nlm.nih.gov/gene/84612
SLC35B4	6	0.017288	0.063855	0.978298	1318	4	1.4741	4	https://www.ncbi.nlm.nih.gov/gene/84912
IL13	6	0.017354	0.064062	0.978298	1319	4	1.2319	4	https://www.ncbi.nlm.nih.gov/gene/3596
SLC28A1	5	0.017356	0.059342	0.978298	1320	4	1.1234	4	https://www.ncbi.nlm.nih.gov/gene/9154
hsa-mir-4481	4	0.017369	0.056277	0.978298	1321	4	0.75106	4	NA
FAM102A	6	0.017381	0.06414	0.978298	1322	1	-1.8234	1	https://www.ncbi.nlm.nih.gov/gene/399665
SCYL1	6	0.017384	0.064154	0.978298	1323	2	-2.1541	2	https://www.ncbi.nlm.nih.gov/gene/57410
hsa-mir-770	4	0.017393	0.056349	0.978298	1324	4	1.3239	4	https://www.ncbi.nlm.nih.gov/gene/768222
OR2B11	5	0.017412	0.059485	0.978298	1325	2	0.070716	2	https://www.ncbi.nlm.nih.gov/gene/127623
PPARG	6	0.017428	0.064289	0.978298	1326	5	1.1342	5	https://www.ncbi.nlm.nih.gov/gene/5468
SULT1C2	6	0.017428	0.064289	0.978298	1327	5	0.9984	5	https://www.ncbi.nlm.nih.gov/gene/6819
PGAP2	6	0.017434	0.064308	0.978298	1328	3	0.93737	3	https://www.ncbi.nlm.nih.gov/gene/27315
NME4	6	0.017447	0.064349	0.978298	1329	3	0.48627	3	https://www.ncbi.nlm.nih.gov/gene/4833
RCC1	6	0.017458	0.064384	0.978298	1330	3	-0.88626	3	https://www.ncbi.nlm.nih.gov/gene/1104
GADD45A	6	0.017482	0.064463	0.978298	1331	3	0.62898	3	https://www.ncbi.nlm.nih.gov/gene/1647
STRN3	6	0.017487	0.064481	0.978298	1332	4	1.2308	4	https://www.ncbi.nlm.nih.gov/gene/29966
ZNF609	6	0.017545	0.064654	0.978298	1333	4	1.3145	4	https://www.ncbi.nlm.nih.gov/gene/23060
DYRK1B	6	0.017549	0.064665	0.978298	1334	4	0.9296	4	https://www.ncbi.nlm.nih.gov/gene/9149
AGXT2L2	6	0.017575	0.064751	0.978298	1335	4	1.0413	4	https://www.ncbi.nlm.nih.gov/gene/85007
hsa-mir-7973-1	4	0.017577	0.05688	0.978298	1336	4	0.99978	4	https://www.ncbi.nlm.nih.gov/gene/102466250
hsa-mir-6894	4	0.017578	0.056884	0.978298	1337	3	1.4169	3	https://www.ncbi.nlm.nih.gov/gene/102466759
ZBP1	6	0.017615	0.064897	0.978298	1338	5	1.2994	5	https://www.ncbi.nlm.nih.gov/gene/81030
ABCB7	6	0.017615	0.064897	0.978298	1339	5	1.2444	5	https://www.ncbi.nlm.nih.gov/gene/22
PNOC	6	0.017617	0.064907	0.978298	1340	3	0.022706	3	https://www.ncbi.nlm.nih.gov/gene/5368
hsa-mir-320b-1	4	0.01762	0.056997	0.978298	1341	2	-1.6847	2	https://www.ncbi.nlm.nih.gov/gene/100302117
ETNK1	6	0.017639	0.064985	0.978298	1342	5	1.3214	5	https://www.ncbi.nlm.nih.gov/gene/55500
GTF2B	6	0.017643	0.064997	0.978298	1343	5	1.0143	5	https://www.ncbi.nlm.nih.gov/gene/2959
hsa-mir-4309	4	0.017683	0.057166	0.978298	1344	3	1.4512	3	NA
FDXR	6	0.017687	0.065125	0.978298	1345	4	1.3525	4	https://www.ncbi.nlm.nih.gov/gene/2232
DOT1L	6	0.017691	0.065137	0.978298	1346	2	-0.98529	2	https://www.ncbi.nlm.nih.gov/gene/84444
FAM86C1	5	0.017721	0.060333	0.978298	1347	3	1.4549	3	https://www.ncbi.nlm.nih.gov/gene/55199
CETN2	6	0.017798	0.065486	0.978298	1348	5	1.2559	5	https://www.ncbi.nlm.nih.gov/gene/1069
OR8K5	6	0.017821	0.065553	0.978298	1349	5	1.0662	5	https://www.ncbi.nlm.nih.gov/gene/219453
CCDC121	6	0.017827	0.065571	0.978298	1350	4	1.18	4	https://www.ncbi.nlm.nih.gov/gene/79635
PDAP1	6	0.017843	0.065626	0.978298	1351	4	1.4103	4	https://www.ncbi.nlm.nih.gov/gene/11333
TMSB15A	5	0.017848	0.060688	0.978298	1352	4	1.2797	4	https://www.ncbi.nlm.nih.gov/gene/11013
LRPAP1	6	0.017858	0.065678	0.978298	1353	4	1.0075	4	https://www.ncbi.nlm.nih.gov/gene/4043
GSTO2	6	0.017858	0.065678	0.978298	1354	2	-2.0083	2	https://www.ncbi.nlm.nih.gov/gene/119391
RBP4	6	0.01786	0.065686	0.978298	1355	5	0.91143	5	https://www.ncbi.nlm.nih.gov/gene/5950
NEURL	6	0.017895	0.0658	0.978298	1356	3	0.52648	3	https://www.ncbi.nlm.nih.gov/gene/9148
MDFIC	6	0.017907	0.065832	0.978298	1357	3	0.40103	3	https://www.ncbi.nlm.nih.gov/gene/29969
PSMB6	6	0.017907	0.065832	0.978298	1358	5	0.92533	5	https://www.ncbi.nlm.nih.gov/gene/5694
ACSL1	6	0.017907	0.065832	0.978298	1359	2	0.26798	2	https://www.ncbi.nlm.nih.gov/gene/2180
CEP135	6	0.017907	0.065832	0.978298	1360	2	-3.6052	2	https://www.ncbi.nlm.nih.gov/gene/9662
ARHGEF33	6	0.017907	0.065832	0.978298	1361	3	0.48631	3	https://www.ncbi.nlm.nih.gov/gene/100271715
FBXL2	6	0.017907	0.065832	0.978298	1362	3	-0.45694	3	https://www.ncbi.nlm.nih.gov/gene/25827
ZNF582	6	0.017907	0.065832	0.978298	1363	3	0.40945	3	https://www.ncbi.nlm.nih.gov/gene/147948
WDR47	6	0.017907	0.065832	0.978298	1364	2	-3.5711	2	https://www.ncbi.nlm.nih.gov/gene/22911
RHOQ	6	0.017907	0.065832	0.978298	1365	3	0.0045476	3	https://www.ncbi.nlm.nih.gov/gene/23433
MATN4	6	0.017907	0.065832	0.978298	1366	3	0.65104	3	https://www.ncbi.nlm.nih.gov/gene/8785
TMC1	6	0.017907	0.065832	0.978298	1367	3	-0.89789	3	https://www.ncbi.nlm.nih.gov/gene/117531
SP140	6	0.017907	0.065832	0.978298	1368	1	-0.3967	1	https://www.ncbi.nlm.nih.gov/gene/11262
IL13RA1	6	0.017907	0.065832	0.978298	1369	3	0.312	3	https://www.ncbi.nlm.nih.gov/gene/3597
PSMD5	6	0.017916	0.065857	0.978298	1370	4	1.3249	4	https://www.ncbi.nlm.nih.gov/gene/5711
TNFSF13B	5	0.017919	0.060896	0.978298	1371	4	0.88291	4	https://www.ncbi.nlm.nih.gov/gene/10673
SLC39A6	6	0.017921	0.065877	0.978298	1372	3	-0.21822	3	https://www.ncbi.nlm.nih.gov/gene/25800
LIPH	6	0.017922	0.065878	0.978298	1373	5	0.864	5	https://www.ncbi.nlm.nih.gov/gene/200879
RCBTB1	6	0.017927	0.06589	0.978298	1374	5	0.7681	5	https://www.ncbi.nlm.nih.gov/gene/55213
UPF2	6	0.01797	0.06603	0.978729	1375	5	1.019	5	https://www.ncbi.nlm.nih.gov/gene/26019
ZNF460	6	0.017993	0.066099	0.978729	1376	3	0.61097	3	https://www.ncbi.nlm.nih.gov/gene/10794
MAP3K19	6	0.0181	0.066454	0.979482	1377	5	0.86416	5	https://www.ncbi.nlm.nih.gov/gene/80122
hsa-mir-4491	4	0.018102	0.0584	0.978298	1378	3	1.3723	3	NA
PTGES2	6	0.018119	0.066517	0.979482	1379	4	1.3565	4	https://www.ncbi.nlm.nih.gov/gene/80142
SLPI	6	0.018141	0.066578	0.979482	1380	2	-1.2905	2	https://www.ncbi.nlm.nih.gov/gene/6590
SMCP	6	0.018141	0.06658	0.979482	1381	5	0.81655	5	https://www.ncbi.nlm.nih.gov/gene/4184
EHD3	6	0.018175	0.066681	0.979482	1382	4	1.0953	4	https://www.ncbi.nlm.nih.gov/gene/30845
BCL2	6	0.018192	0.066728	0.979482	1383	4	1.3041	4	https://www.ncbi.nlm.nih.gov/gene/596
PIP4K2B	6	0.018195	0.066744	0.979482	1384	4	1.1297	4	https://www.ncbi.nlm.nih.gov/gene/8396
CRHBP	6	0.0182	0.066761	0.979482	1385	5	1.1064	5	https://www.ncbi.nlm.nih.gov/gene/1393
hsa-mir-526b	4	0.01822	0.058739	0.978298	1386	3	1.3978	3	NA
GNPDA2	6	0.018262	0.066963	0.979482	1387	4	1.4237	4	https://www.ncbi.nlm.nih.gov/gene/132789
RPL13A	6	0.018296	0.067072	0.979482	1388	3	1.1404	3	https://www.ncbi.nlm.nih.gov/gene/23521
C15orf60	6	0.018347	0.067247	0.979482	1389	5	1.4984	5	https://www.ncbi.nlm.nih.gov/gene/283677
SFTPA1	6	0.018356	0.067277	0.979482	1390	4	1.2872	4	https://www.ncbi.nlm.nih.gov/gene/653509
CYP4F2	6	0.01836	0.067292	0.979482	1391	5	1.2	5	https://www.ncbi.nlm.nih.gov/gene/8529
COX7B2	6	0.018408	0.067449	0.979482	1392	3	0.095893	3	https://www.ncbi.nlm.nih.gov/gene/170712
PLCD3	5	0.018422	0.062219	0.978298	1393	2	0.26484	2	https://www.ncbi.nlm.nih.gov/gene/113026
hsa-mir-4262	4	0.018434	0.059411	0.978298	1394	3	1.3679	3	NA
PPIP5K2	6	0.018441	0.067563	0.979482	1395	5	1.3822	5	https://www.ncbi.nlm.nih.gov/gene/23262
SLC7A13	6	0.018454	0.067611	0.979482	1396	4	1.2422	4	https://www.ncbi.nlm.nih.gov/gene/157724
RAB11FIP2	6	0.018462	0.067635	0.979482	1397	4	0.8539	4	https://www.ncbi.nlm.nih.gov/gene/22841
CCDC14	6	0.018483	0.06769	0.979482	1398	2	-0.22003	2	https://www.ncbi.nlm.nih.gov/gene/64770
hsa-mir-4515	4	0.018506	0.059623	0.978298	1399	3	1.3496	3	NA
PAPSS1	6	0.018528	0.067828	0.979482	1400	5	0.79112	5	https://www.ncbi.nlm.nih.gov/gene/9061
ATG4A	6	0.018533	0.067843	0.979482	1401	2	0.15959	2	https://www.ncbi.nlm.nih.gov/gene/115201
HIST1H4A	6	0.018563	0.067942	0.979482	1402	4	1.2969	4	https://www.ncbi.nlm.nih.gov/gene/8359
OR5D18	6	0.018588	0.068021	0.979482	1403	5	1.0356	5	https://www.ncbi.nlm.nih.gov/gene/219438
RSPO4	5	0.018595	0.062699	0.978298	1404	3	0.50188	3	https://www.ncbi.nlm.nih.gov/gene/343637
BTN3A2	6	0.018635	0.068175	0.979482	1405	4	1.2674	4	https://www.ncbi.nlm.nih.gov/gene/11118
TM2D1	5	0.018641	0.062831	0.978298	1406	4	1.0954	4	https://www.ncbi.nlm.nih.gov/gene/83941
NLRP1	6	0.01866	0.068259	0.979482	1407	4	0.89362	4	https://www.ncbi.nlm.nih.gov/gene/22861
NKAIN4	6	0.018683	0.06833	0.979482	1408	3	0.55649	3	https://www.ncbi.nlm.nih.gov/gene/128414
ZNF239	6	0.018688	0.068343	0.979482	1409	2	-0.86261	2	https://www.ncbi.nlm.nih.gov/gene/8187
SH2D1B	6	0.018719	0.068445	0.979482	1410	5	1.0862	5	https://www.ncbi.nlm.nih.gov/gene/117157
PPM1F	6	0.018746	0.068533	0.979482	1411	5	1.0974	5	https://www.ncbi.nlm.nih.gov/gene/9647
ANGPTL5	6	0.018746	0.068533	0.979482	1412	5	0.77173	5	https://www.ncbi.nlm.nih.gov/gene/253935
PAK2	6	0.018773	0.068607	0.979482	1413	3	0.83969	3	https://www.ncbi.nlm.nih.gov/gene/5062
STK38	6	0.018783	0.068643	0.979482	1414	2	-0.70819	2	https://www.ncbi.nlm.nih.gov/gene/11329
GPAT2	6	0.018783	0.068643	0.979482	1415	2	-2.1252	2	https://www.ncbi.nlm.nih.gov/gene/150763
NR0B1	6	0.018832	0.068801	0.979482	1416	4	1.2594	4	https://www.ncbi.nlm.nih.gov/gene/190
SLC39A7	6	0.018837	0.068813	0.979482	1417	5	1.1005	5	https://www.ncbi.nlm.nih.gov/gene/7922
RGPD4	5	0.018851	0.063359	0.978298	1418	2	-0.93559	2	https://www.ncbi.nlm.nih.gov/gene/285190
ACAP3	6	0.018868	0.068911	0.979482	1419	5	1.0197	5	https://www.ncbi.nlm.nih.gov/gene/116983
SCGB1C1	4	0.018884	0.060712	0.978298	1420	2	-0.31626	2	https://www.ncbi.nlm.nih.gov/gene/147199
TRAPPC2	6	0.018924	0.0691	0.979482	1421	3	0.24722	3	https://www.ncbi.nlm.nih.gov/gene/6399
CIB4	6	0.018933	0.069127	0.979482	1422	3	0.62513	3	https://www.ncbi.nlm.nih.gov/gene/130106
KCNK6	6	0.018963	0.069232	0.979482	1423	4	1.2193	4	https://www.ncbi.nlm.nih.gov/gene/9424
CNN1	6	0.018963	0.069232	0.979482	1424	4	1.5445	4	https://www.ncbi.nlm.nih.gov/gene/1264
DUOXA1	6	0.018977	0.069276	0.979482	1425	2	-3.5988	2	https://www.ncbi.nlm.nih.gov/gene/90527
hsa-mir-185	4	0.018981	0.061007	0.978298	1426	4	1.2604	4	NA
SPSB2	6	0.018991	0.069319	0.979482	1427	3	1.1399	3	https://www.ncbi.nlm.nih.gov/gene/84727
IPO13	6	0.019008	0.069369	0.979482	1428	5	0.86805	5	https://www.ncbi.nlm.nih.gov/gene/9670
CALB1	6	0.019011	0.069376	0.979482	1429	4	1.442	4	https://www.ncbi.nlm.nih.gov/gene/793
C6orf58	6	0.019018	0.069402	0.979482	1430	4	1.073	4	https://www.ncbi.nlm.nih.gov/gene/352999
RNFT2	6	0.019033	0.069459	0.979482	1431	5	0.98313	5	https://www.ncbi.nlm.nih.gov/gene/84900
PDK2	5	0.019034	0.063869	0.978298	1432	3	1.6199	3	https://www.ncbi.nlm.nih.gov/gene/5164
CLTB	6	0.019054	0.069528	0.979482	1433	2	-2.5031	2	https://www.ncbi.nlm.nih.gov/gene/1212
VMO1	6	0.019054	0.069528	0.979482	1434	2	0.29893	2	https://www.ncbi.nlm.nih.gov/gene/284013
ACD	6	0.019069	0.069576	0.979482	1435	3	1.0757	3	https://www.ncbi.nlm.nih.gov/gene/65057
hsa-mir-6076	4	0.01909	0.061335	0.978298	1436	1	-3.4107	1	https://www.ncbi.nlm.nih.gov/gene/102464828
hsa-mir-4499	3	0.019094	0.049402	0.978298	1437	2	2.0129	2	NA
ALDH7A1	6	0.019116	0.069718	0.979482	1438	3	0.29186	3	https://www.ncbi.nlm.nih.gov/gene/501
CABP2	6	0.019123	0.069738	0.979482	1439	4	1.5354	4	https://www.ncbi.nlm.nih.gov/gene/51475
ZFP62	6	0.019156	0.06983	0.979482	1440	5	1.325	5	https://www.ncbi.nlm.nih.gov/gene/643836
LRP1	6	0.019158	0.069837	0.979482	1441	3	0.58674	3	https://www.ncbi.nlm.nih.gov/gene/4035
KCNQ3	6	0.019158	0.069837	0.979482	1442	1	-1.4794	1	https://www.ncbi.nlm.nih.gov/gene/3786
WDR77	6	0.019158	0.069837	0.979482	1443	2	-0.084228	2	https://www.ncbi.nlm.nih.gov/gene/79084
XAB2	6	0.019161	0.069842	0.979482	1444	4	0.89839	4	https://www.ncbi.nlm.nih.gov/gene/56949
C12orf73	6	0.019214	0.070012	0.979482	1445	5	1.0527	5	https://www.ncbi.nlm.nih.gov/gene/728568
GNA12	6	0.019214	0.070012	0.979482	1446	5	1.0835	5	https://www.ncbi.nlm.nih.gov/gene/2768
NPM1	5	0.019222	0.06436	0.978298	1447	3	1.7039	3	https://www.ncbi.nlm.nih.gov/gene/4869
CACNA1H	6	0.019229	0.070062	0.979482	1448	3	1.0165	3	https://www.ncbi.nlm.nih.gov/gene/8912
ADH4	6	0.019233	0.07007	0.979482	1449	4	1.2806	4	https://www.ncbi.nlm.nih.gov/gene/127
CUX2	6	0.019253	0.070122	0.979482	1450	5	1.0911	5	https://www.ncbi.nlm.nih.gov/gene/23316
DIS3	6	0.019283	0.070239	0.979482	1451	3	0.17086	3	https://www.ncbi.nlm.nih.gov/gene/22894
NIPSNAP3A	6	0.019298	0.070298	0.979482	1452	5	0.69468	5	https://www.ncbi.nlm.nih.gov/gene/25934
ILDR2	6	0.019338	0.070421	0.979482	1453	4	1.1059	4	https://www.ncbi.nlm.nih.gov/gene/387597
hsa-mir-4286	4	0.019355	0.062114	0.978298	1454	3	1.3128	3	NA
ACO2	6	0.01938	0.07056	0.979482	1455	5	0.88266	5	https://www.ncbi.nlm.nih.gov/gene/50
SAP25	6	0.01938	0.07056	0.979482	1456	5	1.1928	5	https://www.ncbi.nlm.nih.gov/gene/100316904
SPTY2D1	6	0.019383	0.070568	0.979482	1457	2	-0.24456	2	https://www.ncbi.nlm.nih.gov/gene/144108
C20orf144	6	0.019383	0.070568	0.979482	1458	3	0.44694	3	https://www.ncbi.nlm.nih.gov/gene/128864
ZNF551	6	0.019394	0.070601	0.979482	1459	3	0.82794	3	https://www.ncbi.nlm.nih.gov/gene/90233
CALD1	4	0.019398	0.062252	0.978298	1460	4	1.1118	4	https://www.ncbi.nlm.nih.gov/gene/800
hsa-mir-938	4	0.019407	0.062281	0.978298	1461	2	-0.44924	2	https://www.ncbi.nlm.nih.gov/gene/100126327
WRN	6	0.019409	0.070645	0.979482	1462	4	1.2034	4	https://www.ncbi.nlm.nih.gov/gene/7486
PTPN1	6	0.019425	0.070692	0.979482	1463	5	1.0061	5	https://www.ncbi.nlm.nih.gov/gene/5770
CEL	6	0.019436	0.070728	0.979482	1464	5	1.1092	5	https://www.ncbi.nlm.nih.gov/gene/1056
PVR	6	0.019445	0.070755	0.979482	1465	4	1.4259	4	https://www.ncbi.nlm.nih.gov/gene/5817
RPS15	6	0.019466	0.070823	0.979482	1466	5	1.2376	5	https://www.ncbi.nlm.nih.gov/gene/6209
SRSF10	6	0.019483	0.070879	0.979482	1467	3	0.64547	3	https://www.ncbi.nlm.nih.gov/gene/10772
NPC1L1	6	0.019495	0.07091	0.979482	1468	5	1.0982	5	https://www.ncbi.nlm.nih.gov/gene/29881
SOAT2	5	0.019498	0.065128	0.978298	1469	2	-2.5031	2	https://www.ncbi.nlm.nih.gov/gene/8435
CRISP3	5	0.019498	0.065128	0.978298	1470	3	0.37333	3	https://www.ncbi.nlm.nih.gov/gene/10321
TSSK6	6	0.019504	0.07093	0.979482	1471	5	0.83297	5	https://www.ncbi.nlm.nih.gov/gene/83983
COL4A6	6	0.019504	0.07093	0.979482	1472	5	0.80906	5	https://www.ncbi.nlm.nih.gov/gene/1288
CBLC	6	0.01952	0.070985	0.979482	1473	4	1.3504	4	https://www.ncbi.nlm.nih.gov/gene/23624
DHX58	6	0.019531	0.071021	0.979482	1474	4	1.0201	4	https://www.ncbi.nlm.nih.gov/gene/79132
POT1	6	0.019592	0.071217	0.979482	1475	5	0.85184	5	https://www.ncbi.nlm.nih.gov/gene/25913
ZNF317	6	0.019648	0.07139	0.979482	1476	5	1.2639	5	https://www.ncbi.nlm.nih.gov/gene/57693
hsa-mir-375	4	0.019664	0.062981	0.978298	1477	2	1.1727	2	https://www.ncbi.nlm.nih.gov/gene/494324
NIT2	6	0.019668	0.071456	0.979482	1478	3	-0.033902	3	https://www.ncbi.nlm.nih.gov/gene/56954
HUS1	6	0.019668	0.071456	0.979482	1479	3	0.54106	3	https://www.ncbi.nlm.nih.gov/gene/3364
TUBGCP6	6	0.019674	0.071481	0.979482	1480	4	1.3731	4	https://www.ncbi.nlm.nih.gov/gene/85378
BPIFB1	6	0.019683	0.071512	0.979482	1481	2	-0.17084	2	https://www.ncbi.nlm.nih.gov/gene/92747
SYNPR	6	0.019686	0.07152	0.979482	1482	4	1.1905	4	https://www.ncbi.nlm.nih.gov/gene/132204
DEFB136	6	0.019697	0.07156	0.979482	1483	4	1.1225	4	https://www.ncbi.nlm.nih.gov/gene/613210
SENP1	6	0.019726	0.07166	0.979482	1484	4	1.2119	4	https://www.ncbi.nlm.nih.gov/gene/29843
hsa-mir-7843	4	0.019733	0.063176	0.978298	1485	3	1.5255	3	https://www.ncbi.nlm.nih.gov/gene/102465832
hsa-mir-491	4	0.019733	0.063176	0.978298	1486	3	1.5115	3	https://www.ncbi.nlm.nih.gov/gene/574444
GZF1	6	0.019745	0.071715	0.979482	1487	4	1.5797	4	https://www.ncbi.nlm.nih.gov/gene/64412
MRPL2	6	0.019745	0.071715	0.979482	1488	4	1.3484	4	https://www.ncbi.nlm.nih.gov/gene/51069
hsa-mir-6809	4	0.019756	0.063233	0.978298	1489	2	-0.025547	2	https://www.ncbi.nlm.nih.gov/gene/102465485
hsa-mir-4540	4	0.019768	0.063269	0.978298	1490	3	1.3298	3	NA
TTLL4	6	0.019783	0.071819	0.979482	1491	4	1.1585	4	https://www.ncbi.nlm.nih.gov/gene/9654
LRTM1	6	0.019783	0.071819	0.979482	1492	4	1.0772	4	https://www.ncbi.nlm.nih.gov/gene/57408
KLF13	6	0.019783	0.071819	0.979482	1493	2	-0.47222	2	https://www.ncbi.nlm.nih.gov/gene/51621
OSM	6	0.019794	0.071854	0.979482	1494	4	1.3824	4	https://www.ncbi.nlm.nih.gov/gene/5008
BBOX1	6	0.019801	0.071877	0.979482	1495	2	-0.51423	2	https://www.ncbi.nlm.nih.gov/gene/8424
TBC1D2B	6	0.019801	0.071877	0.979482	1496	5	1.1478	5	https://www.ncbi.nlm.nih.gov/gene/23102
CLDN18	5	0.019824	0.065977	0.978729	1497	2	-2.4642	2	https://www.ncbi.nlm.nih.gov/gene/51208
CSNK1G1	6	0.019855	0.07204	0.979482	1498	3	0.093422	3	https://www.ncbi.nlm.nih.gov/gene/53944
hsa-mir-208b	4	0.019891	0.063633	0.978298	1499	2	0.90097	2	NA
DHH	6	0.019891	0.07214	0.979482	1500	5	1.1816	5	https://www.ncbi.nlm.nih.gov/gene/50846
LIAS	6	0.019904	0.072182	0.979482	1501	4	1.2608	4	https://www.ncbi.nlm.nih.gov/gene/11019
hsa-mir-378e	4	0.01991	0.063685	0.978298	1502	3	1.1918	3	NA
BABAM1	6	0.019916	0.072211	0.979482	1503	5	0.99389	5	https://www.ncbi.nlm.nih.gov/gene/29086
EPO	6	0.019934	0.072269	0.979482	1504	4	0.9176	4	https://www.ncbi.nlm.nih.gov/gene/2056
SUPT3H	6	0.019937	0.072276	0.979482	1505	5	0.7962	5	https://www.ncbi.nlm.nih.gov/gene/8464
FSD2	6	0.019994	0.072455	0.979482	1506	5	1.2336	5	https://www.ncbi.nlm.nih.gov/gene/123722
NR2F6	6	0.02	0.072475	0.979482	1507	3	-0.12355	3	https://www.ncbi.nlm.nih.gov/gene/2063
MTFMT	6	0.020011	0.072518	0.979482	1508	5	1.1124	5	https://www.ncbi.nlm.nih.gov/gene/123263
OTP	6	0.020033	0.072604	0.979482	1509	1	-0.50105	1	https://www.ncbi.nlm.nih.gov/gene/23440
CRIP3	6	0.020033	0.072604	0.979482	1510	3	0.52596	3	https://www.ncbi.nlm.nih.gov/gene/401262
COPS2	6	0.020033	0.072604	0.979482	1511	3	0.1427	3	https://www.ncbi.nlm.nih.gov/gene/9318
UBE4B	6	0.020033	0.072604	0.979482	1512	3	0.7424	3	https://www.ncbi.nlm.nih.gov/gene/10277
LYN	6	0.020047	0.072646	0.979482	1513	3	1.0511	3	https://www.ncbi.nlm.nih.gov/gene/4067
CXorf30	6	0.020051	0.072661	0.979482	1514	3	1.0394	3	https://www.ncbi.nlm.nih.gov/gene/286464
KDELC1	6	0.020051	0.072661	0.979482	1515	2	0.15265	2	https://www.ncbi.nlm.nih.gov/gene/79070
C14orf93	6	0.020081	0.07276	0.979482	1516	5	1.0157	5	https://www.ncbi.nlm.nih.gov/gene/60686
TAOK2	6	0.020081	0.07276	0.979482	1517	5	0.84852	5	https://www.ncbi.nlm.nih.gov/gene/9344
SLITRK1	6	0.020081	0.07276	0.979482	1518	5	0.86125	5	https://www.ncbi.nlm.nih.gov/gene/114798
ZDHHC12	5	0.020092	0.066654	0.979482	1519	4	1.505	4	https://www.ncbi.nlm.nih.gov/gene/84885
ZYG11A	6	0.020104	0.072832	0.979482	1520	4	1.215	4	https://www.ncbi.nlm.nih.gov/gene/440590
SNX20	6	0.020104	0.072832	0.979482	1521	3	1.0223	3	https://www.ncbi.nlm.nih.gov/gene/124460
PEA15	6	0.02011	0.072843	0.979482	1522	4	1.2148	4	https://www.ncbi.nlm.nih.gov/gene/8682
IL17RE	6	0.020135	0.072916	0.979482	1523	2	-0.64303	2	https://www.ncbi.nlm.nih.gov/gene/132014
IL22	6	0.02016	0.072998	0.979482	1524	2	0.11318	2	https://www.ncbi.nlm.nih.gov/gene/50616
IER2	6	0.020172	0.073035	0.979482	1525	3	-0.56363	3	https://www.ncbi.nlm.nih.gov/gene/9592
RIMKLA	6	0.020173	0.073038	0.979482	1526	4	1.5764	4	https://www.ncbi.nlm.nih.gov/gene/284716
JAZF1	6	0.020173	0.073038	0.979482	1527	4	1.4288	4	https://www.ncbi.nlm.nih.gov/gene/221895
WAPAL	6	0.020193	0.073103	0.979482	1528	2	-2.067	2	https://www.ncbi.nlm.nih.gov/gene/23063
NUPR1	6	0.020199	0.073119	0.979482	1529	4	1.3226	4	https://www.ncbi.nlm.nih.gov/gene/26471
AKR1B15	6	0.020205	0.073139	0.979482	1530	5	1.147	5	https://www.ncbi.nlm.nih.gov/gene/441282
HIST1H1C	6	0.02021	0.073155	0.979482	1531	3	1.0078	3	https://www.ncbi.nlm.nih.gov/gene/3006
hsa-mir-548ao	4	0.020242	0.064661	0.978298	1532	2	0.67451	2	NA
WDFY2	6	0.02026	0.073313	0.979482	1533	4	1.1519	4	https://www.ncbi.nlm.nih.gov/gene/115825
AP2S1	6	0.020276	0.073359	0.979482	1534	5	1.2411	5	https://www.ncbi.nlm.nih.gov/gene/1175
KLK4	6	0.020296	0.073422	0.979482	1535	4	1.3209	4	https://www.ncbi.nlm.nih.gov/gene/9622
PDF	5	0.020311	0.06723	0.979482	1536	4	1.3992	4	https://www.ncbi.nlm.nih.gov/gene/64146
NWD1	6	0.020336	0.073558	0.979482	1537	5	1.077	5	https://www.ncbi.nlm.nih.gov/gene/284434
GPR97	6	0.020336	0.073558	0.979482	1538	5	0.94615	5	https://www.ncbi.nlm.nih.gov/gene/222487
FAM181B	6	0.020342	0.073573	0.979482	1539	4	1.2691	4	https://www.ncbi.nlm.nih.gov/gene/220382
DTX3L	6	0.020342	0.073573	0.979482	1540	4	1.1829	4	https://www.ncbi.nlm.nih.gov/gene/151636
hsa-mir-641	4	0.020345	0.064959	0.978298	1541	3	1.6324	3	https://www.ncbi.nlm.nih.gov/gene/693226
FERMT2	6	0.02036	0.073631	0.979482	1542	4	1.1335	4	https://www.ncbi.nlm.nih.gov/gene/10979
LYZL1	6	0.020396	0.073746	0.979482	1543	4	1.1648	4	https://www.ncbi.nlm.nih.gov/gene/84569
RBFA	6	0.020399	0.073753	0.979482	1544	4	1.1616	4	https://www.ncbi.nlm.nih.gov/gene/79863
FBXW12	6	0.020433	0.073867	0.979482	1545	2	-1.3117	2	https://www.ncbi.nlm.nih.gov/gene/285231
FCRLA	6	0.020452	0.073921	0.979482	1546	5	1.1024	5	https://www.ncbi.nlm.nih.gov/gene/84824
KIAA0947	6	0.02046	0.073949	0.979482	1547	4	1.2437	4	https://www.ncbi.nlm.nih.gov/gene/23379
BCL9L	6	0.02046	0.073949	0.979482	1548	4	1.3905	4	https://www.ncbi.nlm.nih.gov/gene/283149
B3GAT1	5	0.020479	0.067675	0.979482	1549	2	-3.6095	2	https://www.ncbi.nlm.nih.gov/gene/27087
FAM196A	6	0.020517	0.074111	0.979482	1550	2	0.25473	2	https://www.ncbi.nlm.nih.gov/gene/642938
EFHD1	6	0.020547	0.074207	0.979482	1551	3	0.72775	3	https://www.ncbi.nlm.nih.gov/gene/80303
CKAP4	6	0.020547	0.074207	0.979482	1552	2	-0.58128	2	https://www.ncbi.nlm.nih.gov/gene/10970
CUL4B	6	0.020555	0.074241	0.979482	1553	5	0.79471	5	https://www.ncbi.nlm.nih.gov/gene/8450
ALPK3	6	0.020583	0.074327	0.979482	1554	1	-0.5475	1	https://www.ncbi.nlm.nih.gov/gene/57538
KCNMB3	6	0.020589	0.074346	0.979482	1555	2	0.10282	2	https://www.ncbi.nlm.nih.gov/gene/27094
DPCD	6	0.020623	0.074462	0.979482	1556	4	1.1505	4	https://www.ncbi.nlm.nih.gov/gene/25911
hsa-mir-3155a	4	0.020629	0.065795	0.978298	1557	4	1.0656	4	https://www.ncbi.nlm.nih.gov/gene/100422989
YTHDF3	6	0.020647	0.074546	0.979482	1558	5	0.84701	5	https://www.ncbi.nlm.nih.gov/gene/253943
RBM14-RBM4	4	0.020659	0.06587	0.978298	1559	2	0.81053	2	https://www.ncbi.nlm.nih.gov/gene/100526737
GABPB1	6	0.020682	0.074651	0.979482	1560	3	0.45303	3	https://www.ncbi.nlm.nih.gov/gene/2553
KHSRP	6	0.020682	0.074651	0.979482	1561	2	-2.5044	2	https://www.ncbi.nlm.nih.gov/gene/8570
HTT	6	0.020728	0.074793	0.979482	1562	5	1.2578	5	https://www.ncbi.nlm.nih.gov/gene/3064
HEXIM1	6	0.020728	0.074793	0.979482	1563	5	1.3121	5	https://www.ncbi.nlm.nih.gov/gene/10614
hsa-mir-567	4	0.020733	0.066066	0.978729	1564	2	1.0586	2	https://www.ncbi.nlm.nih.gov/gene/693152
SYT10	6	0.020762	0.074902	0.979482	1565	3	0.91927	3	https://www.ncbi.nlm.nih.gov/gene/341359
GABRP	6	0.020776	0.074943	0.979482	1566	4	1.152	4	https://www.ncbi.nlm.nih.gov/gene/2568
INO80B	6	0.020782	0.074971	0.979482	1567	3	0.21259	3	https://www.ncbi.nlm.nih.gov/gene/83444
CLLU1OS	6	0.020805	0.075042	0.979482	1568	4	0.93893	4	https://www.ncbi.nlm.nih.gov/gene/574016
CCDC42B	6	0.020834	0.075131	0.979482	1569	4	1.2507	4	https://www.ncbi.nlm.nih.gov/gene/387885
CCDC74B	5	0.020838	0.068612	0.979482	1570	3	1.4646	3	https://www.ncbi.nlm.nih.gov/gene/91409
H1FOO	6	0.020869	0.075249	0.979482	1571	4	1.2388	4	https://www.ncbi.nlm.nih.gov/gene/132243
PTPN14	6	0.02089	0.07531	0.979482	1572	4	0.91097	4	https://www.ncbi.nlm.nih.gov/gene/5784
TMEM138	6	0.02089	0.07531	0.979482	1573	2	-0.67718	2	https://www.ncbi.nlm.nih.gov/gene/51524
TNK2	6	0.02089	0.07531	0.979482	1574	2	-0.53628	2	https://www.ncbi.nlm.nih.gov/gene/10188
SH3D21	6	0.020932	0.075441	0.979482	1575	2	0.13559	2	https://www.ncbi.nlm.nih.gov/gene/79729
IGLON5	5	0.020948	0.068908	0.979482	1576	2	-1.5198	2	https://www.ncbi.nlm.nih.gov/gene/402665
MGP	6	0.02098	0.075581	0.979482	1577	3	0.92586	3	https://www.ncbi.nlm.nih.gov/gene/4256
ADORA2B	6	0.020987	0.0756	0.979482	1578	5	1.2738	5	https://www.ncbi.nlm.nih.gov/gene/136
CLDN9	6	0.020987	0.0756	0.979482	1579	5	0.90188	5	https://www.ncbi.nlm.nih.gov/gene/9080
ZNF276	6	0.021018	0.075706	0.979482	1580	5	0.87111	5	https://www.ncbi.nlm.nih.gov/gene/92822
GPR50	6	0.021032	0.075754	0.979482	1581	4	0.7352	4	https://www.ncbi.nlm.nih.gov/gene/9248
DGCR2	6	0.02104	0.075777	0.979482	1582	5	0.8981	5	https://www.ncbi.nlm.nih.gov/gene/9993
PRKACG	6	0.021088	0.075941	0.979482	1583	3	0.076268	3	https://www.ncbi.nlm.nih.gov/gene/5568
PHF7	5	0.021107	0.069337	0.979482	1584	4	0.89258	4	https://www.ncbi.nlm.nih.gov/gene/51533
SOLH	6	0.021113	0.076017	0.979482	1585	4	1.3084	4	https://www.ncbi.nlm.nih.gov/gene/6650
LRIG1	6	0.021163	0.076169	0.979482	1586	5	0.9231	5	https://www.ncbi.nlm.nih.gov/gene/26018
ZNRF3	6	0.021163	0.076169	0.979482	1587	5	1.0756	5	https://www.ncbi.nlm.nih.gov/gene/84133
FARP2	6	0.021163	0.076169	0.979482	1588	5	0.85805	5	https://www.ncbi.nlm.nih.gov/gene/9855
SPINK5	6	0.021177	0.076209	0.979482	1589	4	0.98421	4	https://www.ncbi.nlm.nih.gov/gene/11005
RHOU	6	0.021219	0.076341	0.979482	1590	5	0.7881	5	https://www.ncbi.nlm.nih.gov/gene/58480
GNB1L	6	0.021232	0.076391	0.979482	1591	2	-0.093078	2	https://www.ncbi.nlm.nih.gov/gene/54584
PPP1R3B	6	0.021258	0.076469	0.979482	1592	2	-0.54309	2	https://www.ncbi.nlm.nih.gov/gene/79660
SPRR2E	2	0.021262	0.039453	0.978298	1593	2	1.596	2	https://www.ncbi.nlm.nih.gov/gene/6704
ATP5A1	6	0.021307	0.076618	0.979482	1594	2	-0.36863	2	https://www.ncbi.nlm.nih.gov/gene/498
NonTargetingControlGuideForHuman_0652	1	0.021316	0.021268	0.927682	1595	1	2.6147	1	NA
DTNA	6	0.02137	0.076838	0.979482	1596	3	0.15867	3	https://www.ncbi.nlm.nih.gov/gene/1837
AGO3	6	0.021381	0.076874	0.979482	1597	2	0.1128	2	https://www.ncbi.nlm.nih.gov/gene/192669
IL26	6	0.021398	0.07693	0.979482	1598	4	1.1608	4	https://www.ncbi.nlm.nih.gov/gene/55801
FOLR2	6	0.021422	0.077011	0.979482	1599	4	1.3394	4	https://www.ncbi.nlm.nih.gov/gene/2350
TMEM8B	6	0.021434	0.077053	0.979482	1600	3	0.59271	3	https://www.ncbi.nlm.nih.gov/gene/51754
hsa-mir-501	4	0.021436	0.068129	0.979482	1601	3	1.4504	3	https://www.ncbi.nlm.nih.gov/gene/574503
MFSD4	6	0.021439	0.07706	0.979482	1602	5	0.92782	5	https://www.ncbi.nlm.nih.gov/gene/148808
HDDC2	6	0.021444	0.077074	0.979482	1603	3	-0.69226	3	https://www.ncbi.nlm.nih.gov/gene/51020
SLIT1	6	0.021481	0.077192	0.979482	1604	4	0.5149	4	https://www.ncbi.nlm.nih.gov/gene/6585
PTP4A2	6	0.021511	0.077285	0.979482	1605	4	1.2352	4	https://www.ncbi.nlm.nih.gov/gene/8073
TMCC3	6	0.021521	0.077313	0.979482	1606	5	1.1646	5	https://www.ncbi.nlm.nih.gov/gene/57458
hsa-mir-5187	4	0.021526	0.068391	0.979482	1607	2	-1.3892	2	NA
RPL29	6	0.021531	0.077342	0.979482	1608	4	0.88732	4	https://www.ncbi.nlm.nih.gov/gene/6159
LRIF1	6	0.021558	0.07743	0.979482	1609	3	0.31767	3	https://www.ncbi.nlm.nih.gov/gene/55791
TRIM55	6	0.021598	0.077547	0.979482	1610	3	0.22137	3	https://www.ncbi.nlm.nih.gov/gene/84675
IL15RA	5	0.021608	0.070653	0.979482	1611	4	0.87889	4	https://www.ncbi.nlm.nih.gov/gene/3601
C12orf76	6	0.021633	0.077662	0.979482	1612	2	0.36303	2	https://www.ncbi.nlm.nih.gov/gene/400073
DDX19B	5	0.021648	0.070758	0.979482	1613	4	1.2479	4	https://www.ncbi.nlm.nih.gov/gene/11269
C16orf97	6	0.021731	0.07796	0.979482	1614	3	0.033394	3	https://www.ncbi.nlm.nih.gov/gene/388276
SERPINE3	6	0.021731	0.07796	0.979482	1615	4	0.86803	4	https://www.ncbi.nlm.nih.gov/gene/647174
NTRK1	6	0.021731	0.07796	0.979482	1616	3	0.59381	3	https://www.ncbi.nlm.nih.gov/gene/4914
DNAJA4	6	0.021731	0.07796	0.979482	1617	2	-1.2606	2	https://www.ncbi.nlm.nih.gov/gene/55466
GNAS	6	0.021731	0.07796	0.979482	1618	5	0.76129	5	https://www.ncbi.nlm.nih.gov/gene/2778
GNPNAT1	6	0.021731	0.07796	0.979482	1619	3	0.49354	3	https://www.ncbi.nlm.nih.gov/gene/64841
TMEM183A	6	0.02179	0.078149	0.979482	1620	5	1.2586	5	https://www.ncbi.nlm.nih.gov/gene/92703
SRD5A1	6	0.021848	0.078323	0.979482	1621	3	0.3024	3	https://www.ncbi.nlm.nih.gov/gene/6715
TRIM65	6	0.021858	0.078354	0.979482	1622	2	-1.5965	2	https://www.ncbi.nlm.nih.gov/gene/201292
GPS2	6	0.021874	0.078408	0.979482	1623	5	0.92778	4	https://www.ncbi.nlm.nih.gov/gene/2874
NonTargetingControlGuideForHuman_0781	1	0.021879	0.02183	0.930975	1624	1	2.6721	1	NA
hsa-mir-1258	4	0.021926	0.069538	0.979482	1625	1	0.10232	1	https://www.ncbi.nlm.nih.gov/gene/100302172
CPNE5	6	0.021957	0.078661	0.979482	1626	5	1.2291	5	https://www.ncbi.nlm.nih.gov/gene/57699
NUF2	6	0.021961	0.078672	0.979482	1627	4	1.5328	4	https://www.ncbi.nlm.nih.gov/gene/83540
RECQL4	6	0.021976	0.078721	0.979482	1628	4	1.1762	4	https://www.ncbi.nlm.nih.gov/gene/9401
DARC	6	0.02198	0.078731	0.979482	1629	3	0.18955	3	https://www.ncbi.nlm.nih.gov/gene/2532
RUNX1	6	0.02199	0.078762	0.979482	1630	4	1.3755	4	https://www.ncbi.nlm.nih.gov/gene/861
MGAT1	6	0.02199	0.078762	0.979482	1631	3	0.16977	3	https://www.ncbi.nlm.nih.gov/gene/4245
OR51F1	6	0.022028	0.078888	0.979482	1632	4	1.2339	4	https://www.ncbi.nlm.nih.gov/gene/256892
FRRS1L	6	0.022082	0.079049	0.979482	1633	5	1.2233	5	https://www.ncbi.nlm.nih.gov/gene/23732
KLK14	6	0.022105	0.079121	0.979482	1634	2	-0.26549	2	https://www.ncbi.nlm.nih.gov/gene/43847
DENND5A	6	0.022105	0.079121	0.979482	1635	3	0.68662	3	https://www.ncbi.nlm.nih.gov/gene/23258
OR4K17	5	0.022116	0.072011	0.979482	1636	4	1.0775	4	https://www.ncbi.nlm.nih.gov/gene/390436
AATK	6	0.022135	0.079212	0.979482	1637	4	1.3311	4	https://www.ncbi.nlm.nih.gov/gene/9625
GRM8	6	0.022149	0.079258	0.979482	1638	5	0.8851	5	https://www.ncbi.nlm.nih.gov/gene/2918
hsa-mir-1257	4	0.022174	0.070275	0.979482	1639	2	-0.72544	2	https://www.ncbi.nlm.nih.gov/gene/100302168
LCAT	6	0.022175	0.079347	0.979482	1640	4	1.3098	4	https://www.ncbi.nlm.nih.gov/gene/3931
DNAJC15	6	0.02218	0.079362	0.979482	1641	4	0.99508	4	https://www.ncbi.nlm.nih.gov/gene/29103
NUDCD3	6	0.022189	0.079386	0.979482	1642	2	-0.032092	2	https://www.ncbi.nlm.nih.gov/gene/23386
ERLIN1	6	0.022211	0.079459	0.979482	1643	2	-0.056636	2	https://www.ncbi.nlm.nih.gov/gene/10613
MYO18B	6	0.02223	0.079511	0.979482	1644	3	0.58173	3	https://www.ncbi.nlm.nih.gov/gene/84700
hsa-mir-595	4	0.022239	0.070471	0.979482	1645	2	1.0113	2	https://www.ncbi.nlm.nih.gov/gene/693180
HOXA5	6	0.022251	0.079582	0.979482	1646	3	-1.7746	3	https://www.ncbi.nlm.nih.gov/gene/3202
PDHX	6	0.022253	0.079591	0.979482	1647	5	0.78631	5	https://www.ncbi.nlm.nih.gov/gene/8050
KIAA1524	6	0.022257	0.079603	0.979482	1648	4	1.1825	4	https://www.ncbi.nlm.nih.gov/gene/57650
EBLN1	6	0.022257	0.079603	0.979482	1649	4	1.3863	4	https://www.ncbi.nlm.nih.gov/gene/340900
PDK4	6	0.022282	0.079695	0.979482	1650	5	0.96883	5	https://www.ncbi.nlm.nih.gov/gene/5166
SPSB3	6	0.022298	0.079746	0.979482	1651	5	0.74801	5	https://www.ncbi.nlm.nih.gov/gene/90864
TCIRG1	6	0.022305	0.079766	0.979482	1652	4	0.53482	4	https://www.ncbi.nlm.nih.gov/gene/10312
PON3	6	0.022305	0.079766	0.979482	1653	3	0.3897	3	https://www.ncbi.nlm.nih.gov/gene/5446
PECAM1	6	0.022321	0.079818	0.979482	1654	3	-0.67671	3	https://www.ncbi.nlm.nih.gov/gene/5175
SMYD5	6	0.022331	0.079849	0.979482	1655	4	1.3287	4	https://www.ncbi.nlm.nih.gov/gene/10322
CCL4	5	0.022338	0.072582	0.979482	1656	4	1.477	4	https://www.ncbi.nlm.nih.gov/gene/6351
ATP6V1G1	6	0.022391	0.080034	0.979482	1657	4	1.4222	4	https://www.ncbi.nlm.nih.gov/gene/9550
MRPL16	6	0.022391	0.080034	0.979482	1658	4	1.0962	4	https://www.ncbi.nlm.nih.gov/gene/54948
TCF24	5	0.022392	0.072714	0.979482	1659	3	0.87994	3	https://www.ncbi.nlm.nih.gov/gene/100129654
CYB561D1	6	0.022429	0.080151	0.979482	1660	1	-0.26935	1	https://www.ncbi.nlm.nih.gov/gene/284613
NRP2	6	0.022451	0.080221	0.979482	1661	5	1.0933	5	https://www.ncbi.nlm.nih.gov/gene/8828
ANXA6	6	0.022461	0.080249	0.979482	1662	5	1.2114	5	https://www.ncbi.nlm.nih.gov/gene/309
HIST1H3J	6	0.022504	0.080381	0.979482	1663	4	1.2155	4	https://www.ncbi.nlm.nih.gov/gene/8356
SCUBE2	6	0.022523	0.080441	0.979482	1664	3	0.22341	3	https://www.ncbi.nlm.nih.gov/gene/57758
ENDOV	6	0.022532	0.080466	0.979482	1665	2	-0.33347	2	https://www.ncbi.nlm.nih.gov/gene/284131
ZSCAN16	6	0.022554	0.080537	0.979482	1666	4	0.96382	4	https://www.ncbi.nlm.nih.gov/gene/80345
hsa-mir-6824	4	0.02258	0.071425	0.979482	1667	2	0.60828	2	https://www.ncbi.nlm.nih.gov/gene/102465495
MYL12A	6	0.022594	0.080673	0.979482	1668	3	0.71017	3	https://www.ncbi.nlm.nih.gov/gene/10627
BLOC1S6	6	0.022607	0.080715	0.979482	1669	4	1.0949	4	https://www.ncbi.nlm.nih.gov/gene/26258
MOCS1	6	0.022624	0.080776	0.979482	1670	4	1.2488	4	https://www.ncbi.nlm.nih.gov/gene/4337
CCNT1	6	0.022629	0.080791	0.979482	1671	2	-0.9425	2	https://www.ncbi.nlm.nih.gov/gene/904
hsa-mir-4695	4	0.022642	0.071604	0.979482	1672	2	0.74036	2	NA
GPR34	6	0.022681	0.080943	0.979482	1673	4	0.72265	4	https://www.ncbi.nlm.nih.gov/gene/2857
APOBEC1	6	0.022701	0.081003	0.979482	1674	5	1.4835	5	https://www.ncbi.nlm.nih.gov/gene/339
CPXM1	6	0.022704	0.081013	0.979482	1675	3	0.30817	3	https://www.ncbi.nlm.nih.gov/gene/56265
DEDD2	6	0.022704	0.081013	0.979482	1676	2	-0.30745	2	https://www.ncbi.nlm.nih.gov/gene/162989
ADAMTSL1	6	0.022776	0.08125	0.979482	1677	5	0.91286	5	https://www.ncbi.nlm.nih.gov/gene/92949
PET112	6	0.022828	0.081415	0.979482	1678	4	0.84573	4	https://www.ncbi.nlm.nih.gov/gene/5188
PDIK1L	6	0.022829	0.081419	0.979482	1679	4	1.0265	4	https://www.ncbi.nlm.nih.gov/gene/149420
FBLN2	5	0.022832	0.073867	0.979482	1680	3	1.524	3	https://www.ncbi.nlm.nih.gov/gene/2199
GBE1	6	0.022848	0.081485	0.979482	1681	5	0.91772	5	https://www.ncbi.nlm.nih.gov/gene/2632
CLPB	5	0.02286	0.073961	0.979482	1682	3	0.97849	3	https://www.ncbi.nlm.nih.gov/gene/81570
RAD21	6	0.022861	0.081524	0.979482	1683	3	-0.47653	3	https://www.ncbi.nlm.nih.gov/gene/5885
SLC25A53	6	0.022876	0.081581	0.979482	1684	5	1.1526	5	https://www.ncbi.nlm.nih.gov/gene/401612
ELAVL1	6	0.022925	0.081725	0.979482	1685	5	0.85748	5	https://www.ncbi.nlm.nih.gov/gene/1994
LENG8	6	0.022925	0.081725	0.979482	1686	5	1.0521	5	https://www.ncbi.nlm.nih.gov/gene/114823
COA5	6	0.022953	0.081808	0.979482	1687	1	-0.25727	1	https://www.ncbi.nlm.nih.gov/gene/493753
OR2F2	6	0.022979	0.081896	0.979482	1688	5	0.85305	5	https://www.ncbi.nlm.nih.gov/gene/135948
VAT1	6	0.022979	0.081896	0.979482	1689	5	1.0548	5	https://www.ncbi.nlm.nih.gov/gene/10493
BIRC8	6	0.022986	0.081911	0.979482	1690	4	1.3383	4	https://www.ncbi.nlm.nih.gov/gene/112401
hsa-mir-550a-1	4	0.022993	0.072613	0.979482	1691	4	0.6265	4	https://www.ncbi.nlm.nih.gov/gene/693133
EVX1	6	0.023022	0.082025	0.979482	1692	3	0.84838	3	https://www.ncbi.nlm.nih.gov/gene/2128
SOX3	6	0.023022	0.082025	0.979482	1693	4	1.0229	4	https://www.ncbi.nlm.nih.gov/gene/6658
GNB3	6	0.023028	0.08204	0.979482	1694	2	0.09434	2	https://www.ncbi.nlm.nih.gov/gene/2784
IKZF1	6	0.023044	0.082092	0.979482	1695	3	1.1924	3	https://www.ncbi.nlm.nih.gov/gene/10320
XRCC3	6	0.023048	0.082102	0.979482	1696	5	1.1722	5	https://www.ncbi.nlm.nih.gov/gene/7517
GNRHR	6	0.023048	0.082102	0.979482	1697	5	1.0162	5	https://www.ncbi.nlm.nih.gov/gene/2798
TMEM74B	6	0.023048	0.082102	0.979482	1698	5	1.1246	5	https://www.ncbi.nlm.nih.gov/gene/55321
ACSL3	6	0.023077	0.082191	0.979482	1699	3	0.83734	3	https://www.ncbi.nlm.nih.gov/gene/2181
UNC50	6	0.023092	0.082239	0.979482	1700	4	1.2264	4	https://www.ncbi.nlm.nih.gov/gene/25972
hsa-mir-548ag-2	3	0.023134	0.059115	0.978298	1701	1	-2.9139	1	NA
CD200R1	6	0.023146	0.082425	0.979482	1702	5	0.91896	5	https://www.ncbi.nlm.nih.gov/gene/131450
FUZ	6	0.023203	0.082581	0.979482	1703	5	1.2026	5	https://www.ncbi.nlm.nih.gov/gene/80199
C17orf80	6	0.023209	0.082596	0.979482	1704	3	0.84965	3	https://www.ncbi.nlm.nih.gov/gene/55028
S100A14	6	0.023215	0.082616	0.979482	1705	4	1.2547	4	https://www.ncbi.nlm.nih.gov/gene/57402
RNF212	6	0.023245	0.082718	0.979482	1706	4	1.2065	4	https://www.ncbi.nlm.nih.gov/gene/285498
PPP2CB	6	0.023272	0.082808	0.979482	1707	3	0.74917	3	https://www.ncbi.nlm.nih.gov/gene/5516
WDR65	6	0.023321	0.082958	0.979482	1708	3	0.40996	3	https://www.ncbi.nlm.nih.gov/gene/149465
hsa-mir-6078	4	0.023335	0.073591	0.979482	1709	3	1.4668	3	https://www.ncbi.nlm.nih.gov/gene/102464829
FAM154A	6	0.023352	0.083057	0.979482	1710	2	0.11655	2	https://www.ncbi.nlm.nih.gov/gene/158297
ATF7IP2	6	0.023352	0.083057	0.979482	1711	2	-2.8636	2	https://www.ncbi.nlm.nih.gov/gene/80063
VTI1A	6	0.023352	0.083057	0.979482	1712	3	-0.13113	3	https://www.ncbi.nlm.nih.gov/gene/143187
IARS	6	0.023352	0.083057	0.979482	1713	2	-2.4832	2	https://www.ncbi.nlm.nih.gov/gene/3376
DDX4	6	0.023352	0.083057	0.979482	1714	3	-1.2693	3	https://www.ncbi.nlm.nih.gov/gene/54514
MAP1S	6	0.023407	0.083236	0.979482	1715	4	1.2088	4	https://www.ncbi.nlm.nih.gov/gene/55201
TCTEX1D2	6	0.023415	0.08326	0.979482	1716	3	-1.3637	3	https://www.ncbi.nlm.nih.gov/gene/255758
MS4A1	6	0.023435	0.083327	0.979482	1717	3	0.88254	3	https://www.ncbi.nlm.nih.gov/gene/931
C4orf32	6	0.023449	0.083376	0.979482	1718	5	1.2421	5	https://www.ncbi.nlm.nih.gov/gene/132720
PPP2R2C	6	0.023449	0.083376	0.979482	1719	4	1.0966	4	https://www.ncbi.nlm.nih.gov/gene/5522
PRF1	6	0.02354	0.083642	0.979482	1720	3	1.0959	3	https://www.ncbi.nlm.nih.gov/gene/5551
VCP	6	0.023551	0.083675	0.979482	1721	5	0.89034	5	https://www.ncbi.nlm.nih.gov/gene/7415
hsa-mir-3939	4	0.023557	0.074247	0.979482	1722	1	-0.37668	1	NA
HAS1	6	0.023565	0.083721	0.979482	1723	5	0.85197	5	https://www.ncbi.nlm.nih.gov/gene/3036
HBQ1	6	0.02359	0.083793	0.979482	1724	3	-0.018384	3	https://www.ncbi.nlm.nih.gov/gene/3049
PRRC2C	6	0.023599	0.083815	0.979482	1725	3	0.76693	3	https://www.ncbi.nlm.nih.gov/gene/23215
NISCH	6	0.023617	0.083863	0.979482	1726	2	0.12369	2	https://www.ncbi.nlm.nih.gov/gene/11188
NonTargetingControlGuideForHuman_0407	1	0.02365	0.023572	0.947992	1727	1	2.4415	1	NA
PC	6	0.02365	0.083953	0.979482	1728	3	-0.13929	3	https://www.ncbi.nlm.nih.gov/gene/5091
NPEPL1	6	0.02365	0.083953	0.979482	1729	2	-0.21866	2	https://www.ncbi.nlm.nih.gov/gene/79716
FAM84B	6	0.023653	0.083964	0.979482	1730	5	1.0314	5	https://www.ncbi.nlm.nih.gov/gene/157638
PRDM13	6	0.023653	0.083964	0.979482	1731	4	1.3125	4	https://www.ncbi.nlm.nih.gov/gene/59336
RELN	6	0.023658	0.083978	0.979482	1732	3	0.68504	3	https://www.ncbi.nlm.nih.gov/gene/5649
SMG6	6	0.023702	0.084126	0.979482	1733	3	0.78032	3	https://www.ncbi.nlm.nih.gov/gene/23293
RBMX2	6	0.023715	0.084169	0.979482	1734	4	1.3197	4	https://www.ncbi.nlm.nih.gov/gene/51634
DPYSL5	6	0.023734	0.084223	0.979482	1735	2	-1.9141	2	https://www.ncbi.nlm.nih.gov/gene/56896
NonTargetingControlGuideForHuman_0976	1	0.023739	0.023665	0.949142	1736	1	2.7816	1	NA
FLJ22184	6	0.023752	0.084272	0.979482	1737	4	1.0258	4	NA
RPS4Y1	6	0.023819	0.084484	0.979482	1738	5	0.94421	5	https://www.ncbi.nlm.nih.gov/gene/6192
SIX4	6	0.023819	0.084484	0.979482	1739	5	0.88104	5	https://www.ncbi.nlm.nih.gov/gene/51804
CCDC86	6	0.023825	0.084509	0.979482	1740	2	-1.6639	2	https://www.ncbi.nlm.nih.gov/gene/79080
TTC4	6	0.023875	0.084661	0.979482	1741	2	0.18088	2	https://www.ncbi.nlm.nih.gov/gene/7268
hsa-mir-337	4	0.023877	0.075019	0.979482	1742	3	1.4079	3	https://www.ncbi.nlm.nih.gov/gene/442905
MDM2	6	0.02391	0.084751	0.979482	1743	2	-2.0641	2	https://www.ncbi.nlm.nih.gov/gene/4193
CHKA	6	0.023974	0.084955	0.979482	1744	4	1.2195	4	https://www.ncbi.nlm.nih.gov/gene/1119
RAB18	6	0.024015	0.085084	0.979482	1745	5	1.0278	5	https://www.ncbi.nlm.nih.gov/gene/22931
HAO1	6	0.024027	0.085121	0.979482	1746	4	1.2857	4	https://www.ncbi.nlm.nih.gov/gene/54363
TPMT	6	0.024041	0.085169	0.979482	1747	2	-0.97536	2	https://www.ncbi.nlm.nih.gov/gene/7172
DUSP2	6	0.024059	0.085236	0.979482	1748	2	0.17429	2	https://www.ncbi.nlm.nih.gov/gene/1844
OR52E2	6	0.024072	0.085277	0.979482	1749	4	1.2562	4	https://www.ncbi.nlm.nih.gov/gene/119678
RCAN3	6	0.024072	0.085277	0.979482	1750	3	-0.34246	3	https://www.ncbi.nlm.nih.gov/gene/11123
NPAS4	6	0.024074	0.08528	0.979482	1751	2	-1.6605	2	https://www.ncbi.nlm.nih.gov/gene/266743
RPS3A	6	0.024088	0.085326	0.979482	1752	5	1.1255	5	https://www.ncbi.nlm.nih.gov/gene/6189
ZBTB8A	6	0.024088	0.085326	0.979482	1753	5	0.79023	5	https://www.ncbi.nlm.nih.gov/gene/653121
ZIC2	6	0.024099	0.085355	0.979482	1754	4	1.1241	4	https://www.ncbi.nlm.nih.gov/gene/7546
TIMM8B	6	0.0241	0.085358	0.979482	1755	3	0.58163	3	https://www.ncbi.nlm.nih.gov/gene/26521
OR8K3	6	0.024119	0.085425	0.979482	1756	4	1.4059	4	https://www.ncbi.nlm.nih.gov/gene/219473
AKT3	5	0.024128	0.07724	0.979482	1757	4	0.9375	4	https://www.ncbi.nlm.nih.gov/gene/10000
IRAK3	6	0.024138	0.085493	0.979482	1758	5	1.3996	5	https://www.ncbi.nlm.nih.gov/gene/11213
HMGB4	6	0.024149	0.08553	0.979482	1759	2	0.047848	2	https://www.ncbi.nlm.nih.gov/gene/127540
LRP8	6	0.02417	0.085602	0.979482	1760	3	0.98456	3	https://www.ncbi.nlm.nih.gov/gene/7804
GPC6	6	0.02417	0.085602	0.979482	1761	4	1.3593	4	https://www.ncbi.nlm.nih.gov/gene/10082
REM2	6	0.024208	0.085713	0.979482	1762	4	1.2531	4	https://www.ncbi.nlm.nih.gov/gene/161253
ALX3	6	0.024208	0.085713	0.979482	1763	5	1.0862	5	https://www.ncbi.nlm.nih.gov/gene/257
RHOA	6	0.024211	0.08572	0.979482	1764	5	1.0449	5	https://www.ncbi.nlm.nih.gov/gene/387
STAC2	6	0.024238	0.085805	0.979482	1765	5	1.0232	5	https://www.ncbi.nlm.nih.gov/gene/342667
MAD2L1	6	0.024239	0.085807	0.979482	1766	3	0.91437	3	https://www.ncbi.nlm.nih.gov/gene/4085
hsa-mir-4675	4	0.02424	0.075782	0.979482	1767	3	1.5918	3	NA
ABCC11	6	0.024271	0.085905	0.979482	1768	4	1.0402	4	https://www.ncbi.nlm.nih.gov/gene/85320
COG1	6	0.024273	0.085913	0.979482	1769	2	0.33379	2	https://www.ncbi.nlm.nih.gov/gene/9382
TSSK2	6	0.024278	0.085925	0.979482	1770	5	0.80582	5	https://www.ncbi.nlm.nih.gov/gene/23617
PYCRL	6	0.024278	0.085925	0.979482	1771	5	0.9665	5	https://www.ncbi.nlm.nih.gov/gene/65263
SPANXF1	5	0.024333	0.077777	0.979482	1772	2	0.31435	2	https://www.ncbi.nlm.nih.gov/gene/728695
ADI1	6	0.024343	0.086126	0.979482	1773	5	0.93693	5	https://www.ncbi.nlm.nih.gov/gene/55256
KIR3DL2	5	0.024345	0.077809	0.979482	1774	3	0.58849	3	https://www.ncbi.nlm.nih.gov/gene/3812
IREB2	6	0.024378	0.086232	0.979482	1775	4	1.4595	4	https://www.ncbi.nlm.nih.gov/gene/3658
TLDC1	6	0.024391	0.086271	0.979482	1776	3	0.85361	3	https://www.ncbi.nlm.nih.gov/gene/57707
COL6A5	6	0.024425	0.086377	0.979482	1777	4	1.3143	4	https://www.ncbi.nlm.nih.gov/gene/256076
ZSCAN22	6	0.024434	0.086409	0.979482	1778	5	1.2056	5	https://www.ncbi.nlm.nih.gov/gene/342945
hsa-mir-4673	4	0.024442	0.076183	0.979482	1779	2	1.2021	2	NA
SIGLEC15	6	0.024481	0.086556	0.979482	1780	4	1.259	4	https://www.ncbi.nlm.nih.gov/gene/284266
TIMM17B	6	0.024489	0.086575	0.979482	1781	5	1.0637	5	https://www.ncbi.nlm.nih.gov/gene/10245
STAT3	6	0.024489	0.086575	0.979482	1782	5	1.0583	5	https://www.ncbi.nlm.nih.gov/gene/6774
TBX22	6	0.024497	0.086604	0.979482	1783	4	1.1458	4	https://www.ncbi.nlm.nih.gov/gene/50945
MATN1	6	0.024497	0.086605	0.979482	1784	3	-0.099344	3	https://www.ncbi.nlm.nih.gov/gene/4146
ADAM29	6	0.024497	0.086605	0.979482	1785	2	-0.47501	2	https://www.ncbi.nlm.nih.gov/gene/11086
GFER	6	0.024514	0.086661	0.979482	1786	3	-1.2254	3	https://www.ncbi.nlm.nih.gov/gene/2671
RGS7	6	0.024572	0.086843	0.979482	1787	4	0.91364	4	https://www.ncbi.nlm.nih.gov/gene/6000
WDR85	4	0.024589	0.076486	0.979482	1788	1	-0.18899	1	https://www.ncbi.nlm.nih.gov/gene/92715
MPV17L	5	0.0246	0.07847	0.979482	1789	3	1.3417	3	https://www.ncbi.nlm.nih.gov/gene/255027
KLHDC3	6	0.024618	0.086976	0.979482	1790	3	0.92998	3	https://www.ncbi.nlm.nih.gov/gene/116138
CLP1	6	0.024622	0.086986	0.979482	1791	2	0.16092	2	https://www.ncbi.nlm.nih.gov/gene/10978
PRAC	6	0.024633	0.087019	0.979482	1792	3	0.77305	3	https://www.ncbi.nlm.nih.gov/gene/84366
USP17L7	6	0.024652	0.087078	0.979482	1793	5	1.1592	5	https://www.ncbi.nlm.nih.gov/gene/392197
AAR2	6	0.024671	0.087145	0.979482	1794	1	-1.4792	1	https://www.ncbi.nlm.nih.gov/gene/25980
GUCY2F	6	0.024681	0.087178	0.979482	1795	5	0.84158	5	https://www.ncbi.nlm.nih.gov/gene/2986
SOAT1	6	0.024681	0.087178	0.979482	1796	5	0.77624	5	https://www.ncbi.nlm.nih.gov/gene/6646
ANKRD30A	6	0.024681	0.087178	0.979482	1797	5	0.84475	5	https://www.ncbi.nlm.nih.gov/gene/91074
SHFM1	6	0.024726	0.087324	0.979482	1798	5	1.0962	5	https://www.ncbi.nlm.nih.gov/gene/7979
TIMM50	6	0.024726	0.087324	0.979482	1799	5	0.88193	5	https://www.ncbi.nlm.nih.gov/gene/92609
KLHL32	6	0.024726	0.087324	0.979482	1800	5	0.68773	5	https://www.ncbi.nlm.nih.gov/gene/114792
SMPD3	6	0.024728	0.087328	0.979482	1801	5	1.1716	5	https://www.ncbi.nlm.nih.gov/gene/55512
NEUROD4	6	0.024739	0.087362	0.979482	1802	5	1.1036	5	https://www.ncbi.nlm.nih.gov/gene/58158
ADAMTS5	6	0.024746	0.08738	0.979482	1803	2	-0.35546	2	https://www.ncbi.nlm.nih.gov/gene/11096
DMC1	6	0.024746	0.08738	0.979482	1804	2	-0.39151	2	https://www.ncbi.nlm.nih.gov/gene/11144
LCORL	6	0.024779	0.087478	0.979482	1805	3	0.40593	3	https://www.ncbi.nlm.nih.gov/gene/254251
POLR2M	6	0.024796	0.087536	0.979482	1806	3	0.70771	3	https://www.ncbi.nlm.nih.gov/gene/81488
TACC3	6	0.024816	0.087587	0.979482	1807	4	1.0869	4	https://www.ncbi.nlm.nih.gov/gene/10460
IYD	6	0.024816	0.087588	0.979482	1808	4	1.3148	4	https://www.ncbi.nlm.nih.gov/gene/389434
LRRIQ4	6	0.024816	0.087588	0.979482	1809	4	1.1752	4	https://www.ncbi.nlm.nih.gov/gene/344657
RAB3A	6	0.024845	0.087671	0.979482	1810	5	1.3383	5	https://www.ncbi.nlm.nih.gov/gene/5864
MNX1	6	0.024857	0.087711	0.979482	1811	4	1.1898	4	https://www.ncbi.nlm.nih.gov/gene/3110
ZEB1	6	0.024857	0.087711	0.979482	1812	3	0.64922	3	https://www.ncbi.nlm.nih.gov/gene/6935
CSRP2BP	6	0.024871	0.087758	0.979482	1813	4	1.1989	4	https://www.ncbi.nlm.nih.gov/gene/57325
COX4I2	6	0.02492	0.087897	0.979482	1814	4	0.74817	4	https://www.ncbi.nlm.nih.gov/gene/84701
ADPRH	6	0.02492	0.087897	0.979482	1815	3	-0.4167	3	https://www.ncbi.nlm.nih.gov/gene/141
BMP8A	5	0.024927	0.079311	0.979482	1816	3	1.3305	3	https://www.ncbi.nlm.nih.gov/gene/353500
MMP2	6	0.024936	0.087946	0.979482	1817	5	0.73076	5	https://www.ncbi.nlm.nih.gov/gene/4313
FAM65A	6	0.024949	0.087993	0.979482	1818	2	0.043302	2	https://www.ncbi.nlm.nih.gov/gene/79567
GUCD1	6	0.024949	0.087993	0.979482	1819	4	0.75397	4	https://www.ncbi.nlm.nih.gov/gene/83606
DPH3P1	6	0.024966	0.088049	0.979482	1820	4	1.246	4	https://www.ncbi.nlm.nih.gov/gene/100132911
ITGAM	6	0.024981	0.088092	0.979482	1821	3	0.86955	3	https://www.ncbi.nlm.nih.gov/gene/3684
CCNI2	6	0.024984	0.088103	0.979482	1822	4	1.2498	4	https://www.ncbi.nlm.nih.gov/gene/645121
SLC34A2	5	0.024992	0.079489	0.979482	1823	4	1.0509	4	https://www.ncbi.nlm.nih.gov/gene/10568
ATOH8	6	0.025014	0.088184	0.979482	1824	2	-0.29112	2	https://www.ncbi.nlm.nih.gov/gene/84913
MRPL32	6	0.025018	0.088194	0.979482	1825	4	1.2913	4	https://www.ncbi.nlm.nih.gov/gene/64983
KRTAP4-9	3	0.025022	0.063596	0.978298	1826	1	-0.41999	1	https://www.ncbi.nlm.nih.gov/gene/100132386
ASB12	6	0.025042	0.088274	0.979482	1827	3	0.79527	3	https://www.ncbi.nlm.nih.gov/gene/142689
C1orf229	6	0.025046	0.088287	0.979482	1828	5	0.70705	5	https://www.ncbi.nlm.nih.gov/gene/388759
CCDC104	6	0.025055	0.088311	0.979482	1829	5	1.4858	5	https://www.ncbi.nlm.nih.gov/gene/112942
CHTF8	6	0.025069	0.088352	0.979482	1830	2	-0.18116	2	https://www.ncbi.nlm.nih.gov/gene/54921
HRK	6	0.025069	0.088354	0.979482	1831	2	-0.71316	2	https://www.ncbi.nlm.nih.gov/gene/8739
CS	6	0.025076	0.088372	0.979482	1832	4	1.1287	4	https://www.ncbi.nlm.nih.gov/gene/1431
RABEP1	6	0.025097	0.088433	0.979482	1833	4	1.16	4	https://www.ncbi.nlm.nih.gov/gene/9135
PPEF2	6	0.02511	0.088477	0.979482	1834	4	1.1626	4	https://www.ncbi.nlm.nih.gov/gene/5470
SLC28A3	6	0.025113	0.088485	0.979482	1835	5	1.0746	5	https://www.ncbi.nlm.nih.gov/gene/64078
C12orf60	6	0.025117	0.088495	0.979482	1836	5	1.0277	5	https://www.ncbi.nlm.nih.gov/gene/144608
C6orf52	6	0.025135	0.088553	0.979482	1837	4	1.1305	4	https://www.ncbi.nlm.nih.gov/gene/347744
NLRP9	6	0.025157	0.088614	0.979482	1838	4	1.2074	4	https://www.ncbi.nlm.nih.gov/gene/338321
TEX2	6	0.025169	0.08865	0.979482	1839	2	-2.145	2	https://www.ncbi.nlm.nih.gov/gene/55852
TPM2	6	0.025183	0.088694	0.979482	1840	4	1.4556	4	https://www.ncbi.nlm.nih.gov/gene/7169
FXYD4	6	0.025219	0.0888	0.979482	1841	1	-0.1149	1	https://www.ncbi.nlm.nih.gov/gene/53828
NonTargetingControlGuideForHuman_0886	1	0.025225	0.025146	0.962675	1842	1	2.4296	1	NA
WDR83	6	0.025266	0.088934	0.979482	1843	3	1.029	3	https://www.ncbi.nlm.nih.gov/gene/84292
hsa-mir-4740	4	0.02528	0.077892	0.979482	1844	3	1.2856	3	NA
MECR	5	0.025298	0.080274	0.979482	1845	3	1.1459	3	https://www.ncbi.nlm.nih.gov/gene/51102
ZNF781	6	0.025315	0.089091	0.979482	1846	4	1.3846	4	https://www.ncbi.nlm.nih.gov/gene/163115
DPYSL2	6	0.025315	0.089091	0.979482	1847	4	1.1891	4	https://www.ncbi.nlm.nih.gov/gene/1808
KLRB1	6	0.025337	0.089164	0.979482	1848	3	0.087052	3	https://www.ncbi.nlm.nih.gov/gene/3820
VAMP4	6	0.025364	0.089246	0.979482	1849	4	1.2943	4	https://www.ncbi.nlm.nih.gov/gene/8674
PTGS2	6	0.025364	0.089246	0.979482	1850	3	1.0601	3	https://www.ncbi.nlm.nih.gov/gene/5743
IFFO1	6	0.025379	0.089298	0.979482	1851	5	0.89082	5	https://www.ncbi.nlm.nih.gov/gene/25900
UTP14C	6	0.025384	0.08931	0.979482	1852	3	0.61574	3	https://www.ncbi.nlm.nih.gov/gene/9724
IGFBP3	6	0.025393	0.08934	0.979482	1853	1	0.038324	1	https://www.ncbi.nlm.nih.gov/gene/3486
HNRNPH1	6	0.025393	0.08934	0.979482	1854	4	0.84208	4	https://www.ncbi.nlm.nih.gov/gene/3187
ZNF205	6	0.025416	0.089405	0.979482	1855	4	0.89598	4	https://www.ncbi.nlm.nih.gov/gene/7755
TWF1	6	0.025445	0.089495	0.979482	1856	3	-0.24611	3	https://www.ncbi.nlm.nih.gov/gene/5756
hsa-mir-6805	4	0.025503	0.078357	0.979482	1857	2	0.85488	2	https://www.ncbi.nlm.nih.gov/gene/102465483
CCNT2	6	0.025514	0.089703	0.979482	1858	4	1.3221	4	https://www.ncbi.nlm.nih.gov/gene/905
CENPC1	4	0.025522	0.078401	0.979482	1859	2	1.02	2	https://www.ncbi.nlm.nih.gov/gene/1060
TSPAN32	6	0.025527	0.089753	0.979482	1860	2	0.012169	2	https://www.ncbi.nlm.nih.gov/gene/10077
LSMEM2	6	0.025535	0.089777	0.979482	1861	5	0.90074	4	https://www.ncbi.nlm.nih.gov/gene/132228
RFWD3	6	0.025553	0.089833	0.979482	1862	3	0.52272	3	https://www.ncbi.nlm.nih.gov/gene/55159
ETHE1	6	0.025567	0.08988	0.979482	1863	4	0.87413	4	https://www.ncbi.nlm.nih.gov/gene/23474
NonTargetingControlGuideForHuman_0575	1	0.025581	0.025502	0.971192	1864	1	2.5723	1	NA
DNAJC6	6	0.025617	0.090039	0.979482	1865	2	-1.5608	2	https://www.ncbi.nlm.nih.gov/gene/9829
TLE6	6	0.025635	0.090098	0.979482	1866	4	0.97386	4	https://www.ncbi.nlm.nih.gov/gene/79816
HEPHL1	6	0.025641	0.090117	0.979482	1867	5	0.84589	5	https://www.ncbi.nlm.nih.gov/gene/341208
NADSYN1	6	0.025644	0.090128	0.979482	1868	5	0.89531	5	https://www.ncbi.nlm.nih.gov/gene/55191
DMBX1	6	0.025653	0.090154	0.979482	1869	4	1.2616	4	https://www.ncbi.nlm.nih.gov/gene/127343
TXNL4A	6	0.025666	0.090196	0.979482	1870	2	-2.0115	2	https://www.ncbi.nlm.nih.gov/gene/10907
CDX2	6	0.02569	0.090267	0.979482	1871	3	0.44535	3	https://www.ncbi.nlm.nih.gov/gene/1045
CPO	6	0.025723	0.090366	0.979482	1872	3	0.23675	3	https://www.ncbi.nlm.nih.gov/gene/130749
CREG1	6	0.025727	0.090378	0.979482	1873	4	1.1596	4	https://www.ncbi.nlm.nih.gov/gene/8804
hsa-mir-325	4	0.025749	0.078877	0.979482	1874	3	1.2057	3	https://www.ncbi.nlm.nih.gov/gene/442899
LDB1	6	0.025766	0.090486	0.979482	1875	4	0.96141	4	https://www.ncbi.nlm.nih.gov/gene/8861
hsa-mir-1537	3	0.025772	0.065337	0.978298	1876	1	0.21967	1	https://www.ncbi.nlm.nih.gov/gene/100302139
RPL26L1	6	0.025772	0.090512	0.979482	1877	4	1.2364	4	https://www.ncbi.nlm.nih.gov/gene/51121
NGFRAP1	6	0.025773	0.090515	0.979482	1878	3	-1.0228	3	https://www.ncbi.nlm.nih.gov/gene/27018
NR3C2	6	0.025774	0.09052	0.979482	1879	3	0.51837	3	https://www.ncbi.nlm.nih.gov/gene/4306
hsa-mir-4510	3	0.025778	0.065348	0.978298	1880	3	1.5546	3	NA
hsa-mir-1244-2	2	0.025813	0.047559	0.978298	1881	2	1.4099	2	NA
NSF	6	0.025815	0.090659	0.979482	1882	4	1.2881	4	https://www.ncbi.nlm.nih.gov/gene/4905
GJB4	6	0.025816	0.090662	0.979482	1883	2	0.30444	2	https://www.ncbi.nlm.nih.gov/gene/127534
EDF1	6	0.025835	0.090722	0.979482	1884	5	0.86007	5	https://www.ncbi.nlm.nih.gov/gene/8721
PCDHGA6	2	0.025836	0.047596	0.978298	1885	2	1.5435	2	https://www.ncbi.nlm.nih.gov/gene/56109
CTAG2	5	0.025862	0.081723	0.979482	1886	3	1.2164	3	https://www.ncbi.nlm.nih.gov/gene/30848
USP1	6	0.025865	0.090808	0.979482	1887	2	-2.148	2	https://www.ncbi.nlm.nih.gov/gene/7398
C16orf86	6	0.025913	0.090951	0.979482	1888	4	1.1076	4	https://www.ncbi.nlm.nih.gov/gene/388284
RFC2	6	0.025915	0.090959	0.979482	1889	3	0.27198	3	https://www.ncbi.nlm.nih.gov/gene/5982
TMEM55A	6	0.025927	0.090988	0.979482	1890	5	0.85797	5	https://www.ncbi.nlm.nih.gov/gene/55529
hsa-mir-515-1	3	0.025961	0.065777	0.978298	1891	3	0.78814	3	NA
VAPA	6	0.025977	0.091122	0.979482	1892	3	0.69925	3	https://www.ncbi.nlm.nih.gov/gene/9218
RHOD	6	0.026026	0.091277	0.979482	1893	4	1.4733	4	https://www.ncbi.nlm.nih.gov/gene/29984
CECR2	6	0.02605	0.091362	0.979482	1894	2	-0.71018	2	https://www.ncbi.nlm.nih.gov/gene/27443
DISP2	6	0.026074	0.091437	0.979482	1895	3	0.43307	3	https://www.ncbi.nlm.nih.gov/gene/85455
TNFSF8	6	0.026108	0.091537	0.979482	1896	4	1.0325	4	https://www.ncbi.nlm.nih.gov/gene/944
ATP8A1	6	0.026111	0.091545	0.979482	1897	3	0.3675	3	https://www.ncbi.nlm.nih.gov/gene/10396
SLC45A1	6	0.026111	0.091545	0.979482	1898	2	-0.13262	2	https://www.ncbi.nlm.nih.gov/gene/50651
C5orf51	6	0.026119	0.091564	0.979482	1899	5	0.96898	5	https://www.ncbi.nlm.nih.gov/gene/285636
LY6G5C	6	0.026154	0.091674	0.979482	1900	3	1.0308	3	https://www.ncbi.nlm.nih.gov/gene/80741
EPHA1	6	0.026154	0.091674	0.979482	1901	4	1.0197	4	https://www.ncbi.nlm.nih.gov/gene/2041
hsa-mir-3612	4	0.026163	0.079675	0.979482	1902	3	1.5884	3	NA
MAPK14	6	0.026195	0.091803	0.979482	1903	5	1.1684	5	https://www.ncbi.nlm.nih.gov/gene/1432
TEX13A	6	0.026236	0.091928	0.979482	1904	3	0.38601	3	https://www.ncbi.nlm.nih.gov/gene/56157
DLL4	6	0.026257	0.091986	0.979482	1905	2	-0.28088	2	https://www.ncbi.nlm.nih.gov/gene/54567
CDK1	5	0.026279	0.082796	0.979482	1906	4	1.5009	4	https://www.ncbi.nlm.nih.gov/gene/983
SPSB4	6	0.026303	0.092123	0.979482	1907	5	1.0088	5	https://www.ncbi.nlm.nih.gov/gene/92369
hsa-mir-885	4	0.026312	0.079971	0.979482	1908	3	1.3984	3	https://www.ncbi.nlm.nih.gov/gene/100126334
DIP2B	6	0.026313	0.092153	0.979482	1909	4	0.82164	4	https://www.ncbi.nlm.nih.gov/gene/57609
ARPC3	6	0.026313	0.092153	0.979482	1910	3	0.56707	3	https://www.ncbi.nlm.nih.gov/gene/10094
BIRC6	6	0.026313	0.092153	0.979482	1911	4	1.0818	4	https://www.ncbi.nlm.nih.gov/gene/57448
ORC4	6	0.026313	0.092153	0.979482	1912	2	0.2905	2	https://www.ncbi.nlm.nih.gov/gene/5000
GABRG1	6	0.026313	0.092153	0.979482	1913	1	-0.55214	1	https://www.ncbi.nlm.nih.gov/gene/2565
GRID1	6	0.02635	0.092269	0.979482	1914	4	1.2229	4	https://www.ncbi.nlm.nih.gov/gene/2894
C20orf195	6	0.026385	0.092376	0.979482	1915	4	1.1759	4	https://www.ncbi.nlm.nih.gov/gene/79025
GABRA3	6	0.026388	0.092381	0.979482	1916	5	1.063	5	https://www.ncbi.nlm.nih.gov/gene/2556
LHX6	6	0.02643	0.092511	0.979482	1917	5	1.0461	5	https://www.ncbi.nlm.nih.gov/gene/26468
MYBPHL	6	0.02644	0.092546	0.979482	1918	4	1.3322	4	https://www.ncbi.nlm.nih.gov/gene/343263
ZNF674	5	0.026459	0.083253	0.979482	1919	2	0.35846	2	https://www.ncbi.nlm.nih.gov/gene/641339
hsa-mir-376c	3	0.026483	0.067029	0.979482	1920	1	-2.4244	1	NA
SEC63	6	0.026516	0.092792	0.979482	1921	3	0.62548	3	https://www.ncbi.nlm.nih.gov/gene/11231
NFKBIZ	6	0.026568	0.092937	0.979482	1922	3	0.80954	3	https://www.ncbi.nlm.nih.gov/gene/64332
PRSS22	6	0.026636	0.093151	0.979482	1923	2	-1.8011	2	https://www.ncbi.nlm.nih.gov/gene/64063
NR6A1	6	0.026636	0.093151	0.979482	1924	1	-3.7238	1	https://www.ncbi.nlm.nih.gov/gene/2649
WISP1	6	0.026636	0.093151	0.979482	1925	3	0.69186	3	https://www.ncbi.nlm.nih.gov/gene/8840
ESCO1	6	0.026636	0.093151	0.979482	1926	3	0.23802	3	https://www.ncbi.nlm.nih.gov/gene/114799
ZC3H4	6	0.026723	0.093412	0.979482	1927	4	1.4862	4	https://www.ncbi.nlm.nih.gov/gene/23211
SLC38A8	6	0.026725	0.093418	0.979482	1928	4	1.1957	4	https://www.ncbi.nlm.nih.gov/gene/146167
HSPB11	6	0.026745	0.093482	0.979482	1929	4	1.1262	4	https://www.ncbi.nlm.nih.gov/gene/51668
hsa-mir-3125	4	0.026788	0.080926	0.979482	1930	3	1.381	3	NA
CWC25	6	0.02679	0.093619	0.979482	1931	4	1.0442	4	https://www.ncbi.nlm.nih.gov/gene/54883
MZB1	6	0.02679	0.093619	0.979482	1932	3	0.39331	3	https://www.ncbi.nlm.nih.gov/gene/51237
MIF	6	0.026815	0.093695	0.979482	1933	2	-1.6272	2	https://www.ncbi.nlm.nih.gov/gene/4282
KPTN	6	0.026815	0.093695	0.979482	1934	2	-2.9606	2	https://www.ncbi.nlm.nih.gov/gene/11133
KRTAP17-1	6	0.026837	0.093765	0.979482	1935	5	0.99741	5	https://www.ncbi.nlm.nih.gov/gene/83902
ZBTB8B	6	0.026876	0.093895	0.979482	1936	4	1.2173	4	https://www.ncbi.nlm.nih.gov/gene/728116
RAB28	6	0.026876	0.093895	0.979482	1937	4	1.0458	4	https://www.ncbi.nlm.nih.gov/gene/9364
FAM168B	6	0.026876	0.093895	0.979482	1938	4	1.3004	4	https://www.ncbi.nlm.nih.gov/gene/130074
MBD3L1	6	0.026883	0.093918	0.979482	1939	5	0.8033	5	https://www.ncbi.nlm.nih.gov/gene/85509
SLC6A9	6	0.026929	0.094054	0.979482	1940	2	0.036333	2	https://www.ncbi.nlm.nih.gov/gene/6536
ORMDL2	6	0.026967	0.094184	0.979482	1941	2	-1.8075	2	https://www.ncbi.nlm.nih.gov/gene/29095
C3orf14	6	0.026984	0.094235	0.979482	1942	3	0.066466	3	https://www.ncbi.nlm.nih.gov/gene/57415
GPA33	6	0.026996	0.094272	0.979482	1943	4	0.74828	4	https://www.ncbi.nlm.nih.gov/gene/10223
LPPR3	6	0.027014	0.094335	0.979482	1944	5	0.95785	5	https://www.ncbi.nlm.nih.gov/gene/79948
UBE2S	6	0.027046	0.094443	0.979482	1945	5	1.3071	5	https://www.ncbi.nlm.nih.gov/gene/27338
TARP	6	0.027058	0.094473	0.979482	1946	3	0.64463	3	https://www.ncbi.nlm.nih.gov/gene/445347
ACTG2	6	0.027062	0.094484	0.979482	1947	5	0.56505	5	https://www.ncbi.nlm.nih.gov/gene/72
MED27	6	0.027083	0.094543	0.979482	1948	5	1.045	5	https://www.ncbi.nlm.nih.gov/gene/9442
SEC24A	6	0.027083	0.094543	0.979482	1949	5	0.83294	4	https://www.ncbi.nlm.nih.gov/gene/10802
AMH	6	0.02709	0.094566	0.979482	1950	4	1.3066	4	https://www.ncbi.nlm.nih.gov/gene/268
ZNF747	6	0.027132	0.094691	0.979482	1951	4	1.3229	4	https://www.ncbi.nlm.nih.gov/gene/65988
ZNF468	5	0.027144	0.085018	0.979482	1952	3	1.4936	3	https://www.ncbi.nlm.nih.gov/gene/90333
CEBPZ	6	0.027162	0.094781	0.979482	1953	5	1.1408	5	https://www.ncbi.nlm.nih.gov/gene/10153
CLEC7A	6	0.027184	0.094843	0.979482	1954	5	1.0222	5	https://www.ncbi.nlm.nih.gov/gene/64581
SLC44A5	6	0.027205	0.094907	0.979482	1955	5	0.73608	5	https://www.ncbi.nlm.nih.gov/gene/204962
CSH2	3	0.02725	0.068806	0.979482	1956	2	1.5908	2	https://www.ncbi.nlm.nih.gov/gene/1443
KCNJ16	6	0.027252	0.095053	0.979482	1957	4	1.156	4	https://www.ncbi.nlm.nih.gov/gene/3773
ALX1	6	0.027253	0.095057	0.979482	1958	2	-0.58383	2	https://www.ncbi.nlm.nih.gov/gene/8092
CDC42EP1	6	0.027268	0.095101	0.979482	1959	3	0.6241	3	https://www.ncbi.nlm.nih.gov/gene/11135
ZNF174	6	0.027268	0.095101	0.979482	1960	3	0.5347	3	https://www.ncbi.nlm.nih.gov/gene/7727
DDX51	6	0.027281	0.095145	0.979482	1961	3	0.59647	3	https://www.ncbi.nlm.nih.gov/gene/317781
CXCL10	6	0.027282	0.095148	0.979482	1962	3	0.29626	3	https://www.ncbi.nlm.nih.gov/gene/3627
TTC40	6	0.027282	0.095148	0.979482	1963	3	0.61043	3	https://www.ncbi.nlm.nih.gov/gene/54777
MROH9	6	0.027282	0.095148	0.979482	1964	1	0.068733	1	https://www.ncbi.nlm.nih.gov/gene/80133
PCP4L1	6	0.027282	0.095148	0.979482	1965	5	1.2777	5	https://www.ncbi.nlm.nih.gov/gene/654790
TNFRSF11A	6	0.027282	0.095148	0.979482	1966	3	0.20159	3	https://www.ncbi.nlm.nih.gov/gene/8792
ATG16L2	6	0.027284	0.095153	0.979482	1967	5	0.79979	5	https://www.ncbi.nlm.nih.gov/gene/89849
SYCE1L	6	0.027284	0.095153	0.979482	1968	5	1.1717	5	https://www.ncbi.nlm.nih.gov/gene/100130958
TMEM31	6	0.02732	0.095251	0.979482	1969	3	0.72215	3	https://www.ncbi.nlm.nih.gov/gene/203562
CCT5	6	0.027329	0.095275	0.979482	1970	5	1.0741	5	https://www.ncbi.nlm.nih.gov/gene/22948
ST14	6	0.027357	0.095366	0.979482	1971	4	0.94933	4	https://www.ncbi.nlm.nih.gov/gene/6768
CEACAM1	6	0.027369	0.095405	0.979482	1972	5	1.0319	5	https://www.ncbi.nlm.nih.gov/gene/634
CCNC	6	0.027424	0.095574	0.979482	1973	4	1.2839	4	https://www.ncbi.nlm.nih.gov/gene/892
GTF3C6	6	0.027424	0.095574	0.979482	1974	4	1.1971	4	https://www.ncbi.nlm.nih.gov/gene/112495
hsa-mir-4304	3	0.027427	0.069223	0.979482	1975	3	1.1674	3	NA
LY75	6	0.027439	0.095616	0.979482	1976	5	0.72918	5	https://www.ncbi.nlm.nih.gov/gene/4065
EIF5AL1	6	0.027444	0.095631	0.979482	1977	4	1.23	4	https://www.ncbi.nlm.nih.gov/gene/143244
hsa-mir-629	4	0.027446	0.08224	0.979482	1978	3	1.4833	3	https://www.ncbi.nlm.nih.gov/gene/693214
TSPAN19	6	0.027474	0.095727	0.979482	1979	3	0.40435	3	https://www.ncbi.nlm.nih.gov/gene/144448
PCNXL2	6	0.027476	0.095732	0.979482	1980	3	0.8984	3	https://www.ncbi.nlm.nih.gov/gene/80003
TICRR	6	0.027505	0.095821	0.979482	1981	4	1.1238	4	https://www.ncbi.nlm.nih.gov/gene/90381
SHISA8	6	0.027548	0.095941	0.979482	1982	5	0.71104	5	https://www.ncbi.nlm.nih.gov/gene/440829
MORN3	6	0.027548	0.095943	0.979482	1983	3	0.9253	3	https://www.ncbi.nlm.nih.gov/gene/283385
PLCH1	6	0.027559	0.095976	0.979482	1984	5	0.74327	5	https://www.ncbi.nlm.nih.gov/gene/23007
EMG1	6	0.02758	0.096041	0.979482	1985	2	-0.38832	2	https://www.ncbi.nlm.nih.gov/gene/10436
PDE4D	6	0.027584	0.096054	0.979482	1986	3	0.85911	3	https://www.ncbi.nlm.nih.gov/gene/5144
CALML3	6	0.02762	0.096174	0.979482	1987	3	0.85863	3	https://www.ncbi.nlm.nih.gov/gene/810
HAPLN1	6	0.027623	0.096182	0.979482	1988	3	0.45267	3	https://www.ncbi.nlm.nih.gov/gene/1404
ZNF32	6	0.027645	0.096247	0.979482	1989	5	1.0245	5	https://www.ncbi.nlm.nih.gov/gene/7580
CPNE7	6	0.027664	0.096301	0.979482	1990	4	1.0654	4	https://www.ncbi.nlm.nih.gov/gene/27132
ADIG	6	0.027711	0.096435	0.979482	1991	5	1.3456	5	https://www.ncbi.nlm.nih.gov/gene/149685
PICK1	6	0.027711	0.096435	0.979482	1992	4	1.2088	4	https://www.ncbi.nlm.nih.gov/gene/9463
GEMIN6	5	0.027746	0.086498	0.979482	1993	3	1.3223	3	https://www.ncbi.nlm.nih.gov/gene/79833
CD36	6	0.027753	0.096572	0.979482	1994	2	-0.43038	2	https://www.ncbi.nlm.nih.gov/gene/948
CMSS1	6	0.027753	0.096572	0.979482	1995	3	0.67019	3	https://www.ncbi.nlm.nih.gov/gene/84319
GLOD5	6	0.027753	0.096572	0.979482	1996	2	-0.012264	2	https://www.ncbi.nlm.nih.gov/gene/392465
KIAA1731	6	0.027753	0.096572	0.979482	1997	3	0.49614	3	https://www.ncbi.nlm.nih.gov/gene/85459
NonTargetingControlGuideForHuman_0946	1	0.027758	0.027685	0.976235	1998	1	2.5676	1	NA
[truncated: 19,709 more rows]
