# Supplementary material for: Impairment of FBXO31-mediated Ubiquitination of OGT Upregulates O-GlcNAcylation to Advance Endometrial Malignancy
Source: Research Square preprint supplement (doi:10.21203/rs.3.rs-4019799/v1), 2024-04-12
Supplement: Supplementary file 8 [file 9e1a606acddeb4da807c71b8.xlsx]

## Sheet: Sheet1
Supplementary table 4. Clinical data and predicted O-GlcNAc index in TCGA UCEC dataset
entity_submitter_id	submitter_id.samples	sample	case_submitter_id	sample_type	file_name	days_to_last_follow_up	vital_status	age_at_index	gender	race	figo_stage	primary_diagnosis	neoplasm_histologic_grade	bmi.exposures	diabetes	menopause_status	OS	OS.time	PFI.time	PFI	DFI.time	DFI	DSS.time	DSS	IntegrativeCluster	row_ids	truth-IHC scores	response-O-GlcNAc index
TCGA-D1-A16V-01A-11R-A12I-07	TCGA-D1-A16V-01A	TCGA-D1-A16V-01	TCGA-D1-A16V	01A	1bed3d23-47f1-43ce-8572-879c0d4df6b6	43	Dead	>=60	female	white	Stage III	Endometrioid adenocarcinoma, NOS	G3	35.083	YES	Post (prior bilateral ovariectomy OR >12 mo since LMP with no prior hysterectomy)	1	120	120	0	120	0	120	0	Notassigned	637	NA	6.36544
TCGA-AJ-A3NF-01A-11R-A22K-07	TCGA-AJ-A3NF-01A	TCGA-AJ-A3NF-01	TCGA-AJ-A3NF	01A	2ccbddda-da01-447c-b399-98770105048d	645	Alive	>=60	female	white	Stage III	Serous cystadenocarcinoma, NOS	G3	45.7031	NO	Post (prior bilateral ovariectomy OR >12 mo since LMP with no prior hysterectomy)	0	645	645	0	645	0	645	0	Notassigned	364	NA	7.08229
TCGA-D1-A16S-01A-11R-A12I-07	TCGA-D1-A16S-01A	TCGA-D1-A16S-01	TCGA-D1-A16S	01A	6482ddb4-3def-4d4a-b887-e59cc628f5ff	568	Alive	>=60	female	white	Stage III	Serous cystadenocarcinoma, NOS	G3	22.4813	NO	Post (prior bilateral ovariectomy OR >12 mo since LMP with no prior hysterectomy)	0	568	568	0	568	0	568	0	CN high	358	NA	4.89325
TCGA-B5-A5OE-01A-11R-A31O-07	TCGA-B5-A5OE-01A	TCGA-B5-A5OE-01	TCGA-B5-A5OE	01A	dd2da920-7ddf-4664-aac3-77d123a01bdf	1063	Alive	>=60	female	black or african american	Stage III	Serous cystadenocarcinoma, NOS	G3	NA	NO	NA	0	1063	1063	0	NA	NA	1063	0	Notassigned	118	NA	6.55117
TCGA-D1-A175-01A-11R-A12I-07	TCGA-D1-A175-01A	TCGA-D1-A175-01	TCGA-D1-A175	01A	acec0bfa-be97-4684-a1ce-7aeacc1dbacb	202	Alive	<60	female	white	Stage I	Endometrioid adenocarcinoma, NOS	G3	24.6904	NO	Indeterminate (neither Pre or Postmenopausal)	0	202	202	0	202	0	202	0	Notassigned	378	NA	7.67142
TCGA-FI-A2EX-01A-11R-A17B-07	TCGA-FI-A2EX-01A	TCGA-FI-A2EX-01	TCGA-FI-A2EX	01A	1b99113f-4d98-4ea5-acd2-7b71b99f2bd0	284	Alive	<60	female	white	Stage III	Serous cystadenocarcinoma, NOS	G3	37.5274	NO	Post (prior bilateral ovariectomy OR >12 mo since LMP with no prior hysterectomy)	0	284	213	1	213	1	284	0	CN high	588	NA	6.77263
TCGA-EC-A1NJ-01A-31R-A14D-07	TCGA-EC-A1NJ-01A	TCGA-EC-A1NJ-01	TCGA-EC-A1NJ	01A	a9905756-47e4-4ecf-9122-dca6f41b0f6f	488	Alive	>=60	female	white	Stage I	Endometrioid adenocarcinoma, NOS	G2	26.4855	NA	Post (prior bilateral ovariectomy OR >12 mo since LMP with no prior hysterectomy)	0	488	488	0	488	0	488	0	Notassigned	106	NA	7.1343
TCGA-BK-A139-01A-11R-A277-07	TCGA-BK-A139-01A	TCGA-BK-A139-01	TCGA-BK-A139	01A	6e364595-4cfc-450c-ad92-24a69c79c755	309	Dead	>=60	female	white	Stage I	Endometrioid adenocarcinoma, NOS	G3	24.8777	NO	Post (prior bilateral ovariectomy OR >12 mo since LMP with no prior hysterectomy)	1	943	684	1	NA	NA	943	1	CN high	251	NA	8.6437
TCGA-EY-A2OP-01A-11R-A19W-07	TCGA-EY-A2OP-01A	TCGA-EY-A2OP-01	TCGA-EY-A2OP	01A	2ddbf110-a158-47bc-8da9-6705c563ce1d	944	Alive	>=60	female	white	Stage I	Endometrioid adenocarcinoma, NOS	G3	25.3333	NO	Post (prior bilateral ovariectomy OR >12 mo since LMP with no prior hysterectomy)	0	944	944	0	944	0	944	0	Notassigned	374	NA	5.71132
TCGA-EO-A22X-01A-11R-A180-07	TCGA-EO-A22X-01A	TCGA-EO-A22X-01	TCGA-EO-A22X	01A	99bb2eee-8460-4301-b5fc-ba12c668d08a	1752	Alive	<60	female	not reported	Stage III	Endometrioid adenocarcinoma, NOS	G3	24.2382	NO	Pre (<6 months since LMP AND no prior bilateral ovariectomy AND not on estrogen replacement)	0	1752	1752	0	1752	0	1752	0	Notassigned	328	NA	6.17236
TCGA-AP-A056-01A-11R-A00V-07	TCGA-AP-A056-01A	TCGA-AP-A056-01	TCGA-AP-A056	01A	29774d01-31ba-4ef6-a0cd-fc405ca38efe	2618	Alive	>=60	female	white	Stage II	Endometrioid adenocarcinoma, NOS	G3	24.5603	NA	Post (prior bilateral ovariectomy OR >12 mo since LMP with no prior hysterectomy)	0	2618	2618	0	2618	0	2618	0	POLE	188	NA	5.92205
TCGA-DF-A2KV-01A-11R-A180-07	TCGA-DF-A2KV-01A	TCGA-DF-A2KV-01	TCGA-DF-A2KV	01A	db48adca-406c-4b3d-8e51-41e9ab1c24be	2717	Alive	<60	female	not reported	Stage I	Endometrioid adenocarcinoma, NOS	G3	NA	NO	Post (prior bilateral ovariectomy OR >12 mo since LMP with no prior hysterectomy)	0	2717	2717	0	NA	NA	2717	0	Notassigned	87	NA	4.59538
TCGA-QS-A744-01A-11R-A34R-07	TCGA-QS-A744-01A	TCGA-QS-A744-01	TCGA-QS-A744	01A	19157b7f-adee-40f3-a215-e5855541bb1e	451	Alive	>=60	female	black or african american	Stage III	Endometrioid adenocarcinoma, NOS	G2	28.6048	NO	Post (prior bilateral ovariectomy OR >12 mo since LMP with no prior hysterectomy)	0	451	451	0	NA	NA	451	0	Notassigned	232	NA	7.26991
TCGA-AX-A2H7-01A-12R-A18M-07	TCGA-AX-A2H7-01A	TCGA-AX-A2H7-01	TCGA-AX-A2H7	01A	47be8b73-b6ea-4e17-8e0c-c14c7ff02122	772	Dead	>=60	female	white	Stage I	Endometrioid adenocarcinoma, NOS	G3	26.3146	YES	NA	1	1241	684	1	684	1	1241	1	Notassigned	144	NA	6.60385
TCGA-D1-A16J-01A-11R-A12I-07	TCGA-D1-A16J-01A	TCGA-D1-A16J-01	TCGA-D1-A16J	01A	d2fd4030-88b6-48aa-99e8-59a808a3b870	910	Alive	>=60	female	white	Stage II	Endometrioid adenocarcinoma, NOS	G2	42.9383	NO	Post (prior bilateral ovariectomy OR >12 mo since LMP with no prior hysterectomy)	0	910	910	0	910	0	910	0	CN low	603	NA	5.02373
TCGA-B5-A3FH-01A-11R-A19W-07	TCGA-B5-A3FH-01A	TCGA-B5-A3FH-01	TCGA-B5-A3FH	01A	40d5d05f-a2d2-4bb9-bc36-65af9664e388	841	Alive	>=60	female	black or african american	Stage I	Endometrioid adenocarcinoma, NOS	G3	33.2031	NA	Post (prior bilateral ovariectomy OR >12 mo since LMP with no prior hysterectomy)	0	841	841	0	841	0	841	0	Notassigned	349	NA	7.27932
TCGA-D1-A16G-01A-31R-A12I-07	TCGA-D1-A16G-01A	TCGA-D1-A16G-01	TCGA-D1-A16G	01A	459d88a6-447d-4a66-afa4-4a5c100870ef	NA	Dead	>=60	female	white	Stage IV	Serous cystadenocarcinoma, NOS	G3	25.0593	NO	Post (prior bilateral ovariectomy OR >12 mo since LMP with no prior hysterectomy)	1	834	642	1	NA	NA	834	1	CN high	532	NA	6.87632
TCGA-E6-A8L9-01A-21R-A37O-07	TCGA-E6-A8L9-01A	TCGA-E6-A8L9-01	TCGA-E6-A8L9	01A	88233941-a963-4b16-b03f-9f109aa12b61	1013	Alive	>=60	female	black or african american	Stage I	Serous cystadenocarcinoma, NOS	G3	29.7211	YES	Post (prior bilateral ovariectomy OR >12 mo since LMP with no prior hysterectomy)	0	1013	1013	0	1013	0	1013	0	Notassigned	385	NA	7.26577
TCGA-AP-A1DV-01A-21R-A137-07	TCGA-AP-A1DV-01A	TCGA-AP-A1DV-01	TCGA-AP-A1DV	01A	813798a6-fbf5-442a-829c-7f7eb5062dbf	204	Alive	<60	female	white	Stage II	Endometrioid adenocarcinoma, NOS	G3	21.2874	NO	Post (prior bilateral ovariectomy OR >12 mo since LMP with no prior hysterectomy)	0	204	204	0	204	0	204	0	Notassigned	522	NA	6.65232
TCGA-D1-A176-01A-11R-A12I-07	TCGA-D1-A176-01A	TCGA-D1-A176-01	TCGA-D1-A176	01A	e263c200-6860-45ff-b876-6426246798c6	917	Alive	>=60	female	white	Stage I	Endometrioid adenocarcinoma, NOS	G2	33.705	NO	Post (prior bilateral ovariectomy OR >12 mo since LMP with no prior hysterectomy)	0	917	917	0	917	0	917	0	MSI	310	NA	5.99996
TCGA-A5-A0GU-01A-11R-A16W-07	TCGA-A5-A0GU-01A	TCGA-A5-A0GU-01	TCGA-A5-A0GU	01A	566d5a5c-9035-4945-89f1-f1101bff18ff	860	Alive	<60	female	white	Stage I	Endometrioid adenocarcinoma, NOS	G1	37.1094	NO	Post (prior bilateral ovariectomy OR >12 mo since LMP with no prior hysterectomy)	0	860	860	0	860	0	860	0	CN low	562	NA	6.29448
TCGA-EY-A3L3-01A-11R-A22K-07	TCGA-EY-A3L3-01A	TCGA-EY-A3L3-01	TCGA-EY-A3L3	01A	209d25d9-f9d0-4348-b137-78ab12be1fc8	832	Alive	>=60	female	black or african american	Stage I	Serous cystadenocarcinoma, NOS	G3	35.4925	NO	Post (prior bilateral ovariectomy OR >12 mo since LMP with no prior hysterectomy)	0	832	832	0	832	0	832	0	Notassigned	100	NA	7.39828
TCGA-BG-A0W2-01A-11R-A109-07	TCGA-BG-A0W2-01A	TCGA-BG-A0W2-01	TCGA-BG-A0W2	01A	52ead51d-c3eb-4915-8c87-773c06b31779	1721	Alive	<60	female	white	Stage I	Endometrioid adenocarcinoma, NOS	G1	44.4444	NA	Post (prior bilateral ovariectomy OR >12 mo since LMP with no prior hysterectomy)	0	1721	1721	0	1721	0	1721	0	CN low	508	NA	5.77881
TCGA-BS-A0TG-01A-32R-A16W-07	TCGA-BS-A0TG-01A	TCGA-BS-A0TG-01	TCGA-BS-A0TG	01A	f66fabc1-1e97-4c21-a63f-5313d362775e	2371	Alive	>=60	female	white	Stage III	Endometrioid adenocarcinoma, NOS	G2	24.0882	NO	Post (prior bilateral ovariectomy OR >12 mo since LMP with no prior hysterectomy)	0	2371	2371	0	2371	0	2371	0	CN low	381	NA	6.63354
TCGA-AJ-A2QK-01A-11R-A18M-07	TCGA-AJ-A2QK-01A	TCGA-AJ-A2QK-01	TCGA-AJ-A2QK	01A	ca55d5a0-2924-47d3-ad98-e0b6fe3aa95f	643	Alive	>=60	female	white	Stage I	Endometrioid adenocarcinoma, NOS	G3	49.5317	YES	Post (prior bilateral ovariectomy OR >12 mo since LMP with no prior hysterectomy)	0	643	606	1	606	1	643	0	Notassigned	474	NA	6.24736
TCGA-PG-A917-01A-31R-A37O-07	TCGA-PG-A917-01A	TCGA-PG-A917-01	TCGA-PG-A917	01A	6a98f206-8b72-4b16-af6a-ec568019fc7c	212	Alive	>=60	female	black or african american	Stage I	Endometrioid adenocarcinoma, NOS	G2	NA	NO	Post (prior bilateral ovariectomy OR >12 mo since LMP with no prior hysterectomy)	0	212	212	0	212	0	212	0	Notassigned	457	NA	5.40549
TCGA-D1-A162-01A-11R-A118-07	TCGA-D1-A162-01A	TCGA-D1-A162-01	TCGA-D1-A162	01A	93e4a0a2-5bd8-4e50-a90d-e2ae88669aba	1145	Alive	>=60	female	white	Stage I	Endometrioid adenocarcinoma, NOS	G1	34.6021	NO	Post (prior bilateral ovariectomy OR >12 mo since LMP with no prior hysterectomy)	0	1145	1145	0	1145	0	1145	0	Notassigned	544	NA	6.00236
TCGA-EY-A1G8-01A-11R-A13S-07	TCGA-EY-A1G8-01A	TCGA-EY-A1G8-01	TCGA-EY-A1G8	01A	40f50e4f-9834-4f9f-b6c8-c8b05715eb89	NA	Dead	>=60	female	white	Stage I	Endometrioid adenocarcinoma, NOS	G3	19.1406	NO	Post (prior bilateral ovariectomy OR >12 mo since LMP with no prior hysterectomy)	1	456	456	0	456	0	456	0	Notassigned	565	NA	6.2619
TCGA-FI-A2F8-01A-12R-A17B-07	TCGA-FI-A2F8-01A	TCGA-FI-A2F8-01	TCGA-FI-A2F8	01A	e99d4833-8c2c-4d2a-a8ee-441a4f041b1c	933	Alive	>=60	female	white	Stage II	Serous cystadenocarcinoma, NOS	G3	33.0783	NO	Post (prior bilateral ovariectomy OR >12 mo since LMP with no prior hysterectomy)	0	933	933	0	933	0	933	0	CN high	225	NA	6.67551
TCGA-AJ-A3NC-01A-11R-A22K-07	TCGA-AJ-A3NC-01A	TCGA-AJ-A3NC-01	TCGA-AJ-A3NC	01A	2db163c6-36c5-4fc5-b677-357d38b531cc	1125	Alive	>=60	female	white	Stage I	Endometrioid adenocarcinoma, NOS	G3	38.9739	YES	Post (prior bilateral ovariectomy OR >12 mo since LMP with no prior hysterectomy)	0	1125	1125	0	1125	0	1125	0	Notassigned	382	NA	6.84599
TCGA-B5-A11X-01A-11R-A10J-07	TCGA-B5-A11X-01A	TCGA-B5-A11X-01	TCGA-B5-A11X	01A	7a94d8a1-ae96-43e3-a9d8-8953af78df94	596	Alive	>=60	female	black or african american	Stage III	Carcinoma, undifferentiated, NOS	G3	27.7344	NA	Post (prior bilateral ovariectomy OR >12 mo since LMP with no prior hysterectomy)	0	596	397	1	NA	NA	596	0	Notassigned	313	NA	5.81247
TCGA-EY-A1GC-01A-11R-A13S-07	TCGA-EY-A1GC-01A	TCGA-EY-A1GC-01	TCGA-EY-A1GC	01A	94056b86-1823-4e00-a170-42ca6069014a	1647	Alive	>=60	female	white	Stage I	Endometrioid adenocarcinoma, NOS	G3	34.4222	NA	Post (prior bilateral ovariectomy OR >12 mo since LMP with no prior hysterectomy)	0	1647	1647	0	1647	0	1647	0	Notassigned	241	NA	6.52852
TCGA-PG-A5BC-01A-12R-A27V-07	TCGA-PG-A5BC-01A	TCGA-PG-A5BC-01	TCGA-PG-A5BC	01A	2202d90a-e346-46df-a49b-09ffb7b22cf6	707	Alive	>=60	female	black or african american	Stage II	Serous cystadenocarcinoma, NOS	G3	32.7449	YES	Post (prior bilateral ovariectomy OR >12 mo since LMP with no prior hysterectomy)	0	707	707	0	707	0	707	0	Notassigned	315	NA	7.07429
TCGA-AP-A0LM-01A-11R-A118-07	TCGA-AP-A0LM-01A	TCGA-AP-A0LM-01	TCGA-AP-A0LM	01A	3e4041a1-13b5-48de-b952-0dcee41c4232	825	Alive	<60	female	black or african american	Stage III	Endometrioid adenocarcinoma, NOS	G3	36.2897	NO	Pre (<6 months since LMP AND no prior bilateral ovariectomy AND not on estrogen replacement)	0	825	825	0	825	0	825	0	POLE	458	NA	5.53278
TCGA-AP-A0LG-01A-11R-A16W-07	TCGA-AP-A0LG-01A	TCGA-AP-A0LG-01	TCGA-AP-A0LG	01A	dddbb4fe-4c79-4f38-9105-1caf7678e971	2015	Alive	<60	female	white	Stage I	Endometrioid adenocarcinoma, NOS	G3	28.6048	NA	Post (prior bilateral ovariectomy OR >12 mo since LMP with no prior hysterectomy)	0	2015	2015	0	2015	0	2015	0	MSI	519	NA	6.20322
TCGA-BG-A0MI-01A-11R-A040-07	TCGA-BG-A0MI-01A	TCGA-BG-A0MI-01	TCGA-BG-A0MI	01A	7aeeeae6-6243-4c04-99c9-6609949a0436	NA	Dead	>=60	female	white	Stage I	Endometrioid adenocarcinoma, NOS	G2	37.0983	NO	Post (prior bilateral ovariectomy OR >12 mo since LMP with no prior hysterectomy)	1	714	714	0	NA	NA	714	0	CN low	212	NA	6.54859
TCGA-AJ-A2QM-01A-11R-A18M-07	TCGA-AJ-A2QM-01A	TCGA-AJ-A2QM-01	TCGA-AJ-A2QM	01A	2350d875-e719-4d8e-94ca-ec1c29fac3ca	894	Alive	>=60	female	white	Stage II	Serous cystadenocarcinoma, NOS	G3	25.6055	NO	Post (prior bilateral ovariectomy OR >12 mo since LMP with no prior hysterectomy)	0	894	894	0	894	0	894	0	Notassigned	389	NA	8.0981
TCGA-E6-A2P8-01A-11R-A19W-07	TCGA-E6-A2P8-01A	TCGA-E6-A2P8-01	TCGA-E6-A2P8	01A	0693ceb6-b56c-4293-9c10-9869f55bf85e	NA	Dead	<60	female	black or african american	Stage IV	Serous cystadenocarcinoma, NOS	G3	31.2295	NO	Post (prior bilateral ovariectomy OR >12 mo since LMP with no prior hysterectomy)	1	72	60	1	NA	NA	72	1	Notassigned	215	NA	5.10781
TCGA-AX-A0J0-01A-11R-A109-07	TCGA-AX-A0J0-01A	TCGA-AX-A0J0-01	TCGA-AX-A0J0	01A	001cfe8f-6e1d-439a-ab55-629f8bfb1c25	1220	Alive	<60	female	white	Stage I	Endometrioid adenocarcinoma, NOS	G2	19.9481	NA	Post (prior bilateral ovariectomy OR >12 mo since LMP with no prior hysterectomy)	0	1220	1220	0	1220	0	1220	0	POLE	288	NA	6.78236
TCGA-D1-A17U-01A-21R-A12I-07	TCGA-D1-A17U-01A	TCGA-D1-A17U-01	TCGA-D1-A17U	01A	a50f8982-3770-4645-8fa0-70cde24d65f2	697	Alive	<60	female	white	Stage III	Endometrioid adenocarcinoma, NOS	G2	30.8248	NO	Post (prior bilateral ovariectomy OR >12 mo since LMP with no prior hysterectomy)	0	697	697	0	697	0	697	0	MSI	472	NA	6.14211
TCGA-AX-A0IU-01A-11R-A16W-07	TCGA-AX-A0IU-01A	TCGA-AX-A0IU-01	TCGA-AX-A0IU	01A	34d18f65-8968-47f7-a5da-b8fc26c2bcf5	1087	Alive	>=60	female	black or african american	Stage III	Serous cystadenocarcinoma, NOS	G3	30.4438	NA	Post (prior bilateral ovariectomy OR >12 mo since LMP with no prior hysterectomy)	0	1087	1087	0	1087	0	1087	0	CN high	555	NA	6.87199
TCGA-FI-A2D6-01A-11R-A17B-07	TCGA-FI-A2D6-01A	TCGA-FI-A2D6-01	TCGA-FI-A2D6	01A	7ab48514-b24b-4415-bde4-462d8982c910	273	Dead	>=60	female	white	Stage I	Endometrioid adenocarcinoma, NOS	G3	34.8944	NA	Post (prior bilateral ovariectomy OR >12 mo since LMP with no prior hysterectomy)	1	767	767	0	767	0	767	0	Notassigned	193	NA	4.43804
TCGA-D1-A16F-01A-11R-A12I-07	TCGA-D1-A16F-01A	TCGA-D1-A16F-01	TCGA-D1-A16F	01A	864b0ef0-a8f3-4944-84c3-09c2ae8e865d	80	Alive	>=60	female	white	Stage I	Endometrioid adenocarcinoma, NOS	G2	36.5126	YES	Post (prior bilateral ovariectomy OR >12 mo since LMP with no prior hysterectomy)	0	80	80	0	80	0	80	0	Notassigned	263	NA	6.38217
TCGA-EY-A548-01A-11R-A27V-07	TCGA-EY-A548-01A	TCGA-EY-A548-01	TCGA-EY-A548	01A	e37c9183-b6d0-4800-971d-6a0a70ba7c77	430	Alive	>=60	female	black or african american	Stage I	Endometrioid adenocarcinoma, NOS	G1	27.1816	NA	Post (prior bilateral ovariectomy OR >12 mo since LMP with no prior hysterectomy)	0	430	430	0	430	0	430	0	Notassigned	451	NA	7.01831
TCGA-A5-A2K5-01A-11R-A180-07	TCGA-A5-A2K5-01A	TCGA-A5-A2K5-01	TCGA-A5-A2K5	01A	aa43bf5b-6618-4bb5-8de2-6554cc98c115	752	Alive	>=60	female	white	Stage I	Endometrioid adenocarcinoma, NOS	G3	47.8001	YES	Post (prior bilateral ovariectomy OR >12 mo since LMP with no prior hysterectomy)	0	752	752	0	752	0	752	0	Notassigned	197	NA	5.17625
TCGA-B5-A3S1-01A-11R-A22K-07	TCGA-B5-A3S1-01A	TCGA-B5-A3S1-01	TCGA-B5-A3S1	01A	a5a4ab05-88ff-4512-be4e-4fb65c4c3db7	902	Alive	>=60	female	white	Stage III	Serous cystadenocarcinoma, NOS	G3	28.3039	NO	Post (prior bilateral ovariectomy OR >12 mo since LMP with no prior hysterectomy)	0	902	902	0	902	0	902	0	Notassigned	133	NA	7.68039
TCGA-AJ-A3EL-01A-11R-A213-07	TCGA-AJ-A3EL-01A	TCGA-AJ-A3EL-01	TCGA-AJ-A3EL	01A	a2457e84-5cb8-46f3-b000-d38159a8bf71	684	Alive	<60	female	native hawaiian or other pacific islander	Stage I	Endometrioid adenocarcinoma, NOS	G3	23.7253	NA	Pre (<6 months since LMP AND no prior bilateral ovariectomy AND not on estrogen replacement)	0	684	684	0	684	0	684	0	Notassigned	546	NA	6.09336
TCGA-B5-A0JR-01A-13R-A466-07	TCGA-B5-A0JR-01A	TCGA-B5-A0JR-01	TCGA-B5-A0JR	01A	424c3596-43fd-4d5a-ba74-2bdc7341912c	1731	Alive	>=60	female	white	Stage I	Endometrioid adenocarcinoma, NOS	G3	40.5077	NO	Post (prior bilateral ovariectomy OR >12 mo since LMP with no prior hysterectomy)	0	1731	1731	0	1731	0	1731	0	Notassigned	563	NA	6.11209
TCGA-AX-A1CK-01A-11R-A137-07	TCGA-AX-A1CK-01A	TCGA-AX-A1CK-01	TCGA-AX-A1CK	01A	69c4d355-ccb9-4e0b-8e29-c15a242a4cb1	2441	Alive	<60	female	white	Stage I	Endometrioid adenocarcinoma, NOS	G2	27.0993	NA	Post (prior bilateral ovariectomy OR >12 mo since LMP with no prior hysterectomy)	0	2441	2441	0	NA	NA	2441	0	Notassigned	291	NA	6.24434
TCGA-AX-A062-01A-11R-A00V-07	TCGA-AX-A062-01A	TCGA-AX-A062-01	TCGA-AX-A062	01A	16a248f2-9b21-4cfd-b3bf-1817e692d20d	1399	Alive	<60	female	white	Stage I	Endometrioid adenocarcinoma, NOS	G1	40.7631	NA	Indeterminate (neither Pre or Postmenopausal)	0	1399	1399	0	1399	0	1399	0	CN low	61	NA	7.18831
TCGA-D1-A1O7-01A-11R-A14D-07	TCGA-D1-A1O7-01A	TCGA-D1-A1O7-01	TCGA-D1-A1O7	01A	9ccf0977-1b71-40b5-b22d-4a839d055ff4	32	Alive	>=60	female	white	Stage I	Endometrioid adenocarcinoma, NOS	G1	43.8276	YES	Post (prior bilateral ovariectomy OR >12 mo since LMP with no prior hysterectomy)	0	32	32	0	32	0	32	0	Notassigned	379	NA	5.83939
TCGA-BS-A0UM-01A-11R-A104-07	TCGA-BS-A0UM-01A	TCGA-BS-A0UM-01	TCGA-BS-A0UM	01A	f95178e5-2a8a-47bb-8d2c-81a43aed448b	2644	Alive	>=60	female	white	Stage I	Endometrioid adenocarcinoma, NOS	G1	35.1562	NO	Post (prior bilateral ovariectomy OR >12 mo since LMP with no prior hysterectomy)	0	2644	1454	1	1454	1	2644	0	Notassigned	517	NA	5.41431
TCGA-AX-A1CN-01A-11R-A137-07	TCGA-AX-A1CN-01A	TCGA-AX-A1CN-01	TCGA-AX-A1CN	01A	c04d4ab8-8c79-4f44-9ad4-b71b0aca3194	1143	Alive	<60	female	white	Stage II	Endometrioid adenocarcinoma, NOS	G3	47.6735	NA	Pre (<6 months since LMP AND no prior bilateral ovariectomy AND not on estrogen replacement)	0	1143	1105	1	NA	NA	1143	0	Notassigned	489	NA	6.78623
TCGA-FI-A2CY-01A-11R-A17B-07	TCGA-FI-A2CY-01A	TCGA-FI-A2CY-01	TCGA-FI-A2CY	01A	4ec84128-c55d-4755-9364-5d7d3a7da156	2080	Alive	>=60	female	black or african american	Stage I	Serous cystadenocarcinoma, NOS	G3	47.5624	NA	Post (prior bilateral ovariectomy OR >12 mo since LMP with no prior hysterectomy)	0	2080	2080	0	2080	0	2080	0	Notassigned	599	NA	6.42744
TCGA-D1-A16Y-01A-31R-A12I-07	TCGA-D1-A16Y-01A	TCGA-D1-A16Y-01	TCGA-D1-A16Y	01A	1f108190-3a84-4f4a-8d99-2621ccac226d	532	Alive	<60	female	white	Stage I	Endometrioid adenocarcinoma, NOS	G1	35.7495	NO	Post (prior bilateral ovariectomy OR >12 mo since LMP with no prior hysterectomy)	0	532	532	0	532	0	532	0	POLE	117	NA	6.04937
TCGA-AJ-A3BG-01A-11R-A19W-07	TCGA-AJ-A3BG-01A	TCGA-AJ-A3BG-01	TCGA-AJ-A3BG	01A	9c26acca-6c08-4d28-8f97-96b33d756d34	550	Alive	>=60	female	white	Stage I	Papillary serous cystadenocarcinoma	G3	24.841	NO	Post (prior bilateral ovariectomy OR >12 mo since LMP with no prior hysterectomy)	0	550	480	1	480	1	550	0	Notassigned	538	NA	6.4995
TCGA-AJ-A5DV-01A-11R-A27V-07	TCGA-AJ-A5DV-01A	TCGA-AJ-A5DV-01	TCGA-AJ-A5DV	01A	ed9513cb-89a6-4f5e-afaa-bfd47df25f01	679	Alive	>=60	female	black or african american	Stage I	Endometrioid adenocarcinoma, NOS	G3	57.4219	YES	Post (prior bilateral ovariectomy OR >12 mo since LMP with no prior hysterectomy)	0	679	679	0	679	0	679	0	Notassigned	205	NA	6.21937
TCGA-SL-A6JA-01A-11R-A31O-07	TCGA-SL-A6JA-01A	TCGA-SL-A6JA-01	TCGA-SL-A6JA	01A	9ad325c0-6240-415b-9c7e-152814e8917f	7	Alive	>=60	female	black or african american	Stage I	Endometrioid adenocarcinoma, NOS	G3	46.2548	NA	Post (prior bilateral ovariectomy OR >12 mo since LMP with no prior hysterectomy)	0	7	7	0	7	0	7	0	Notassigned	206	NA	6.06633
TCGA-PG-A6IB-01A-21R-A31O-07	TCGA-PG-A6IB-01A	TCGA-PG-A6IB-01	TCGA-PG-A6IB	01A	61d0ab5a-a4fe-4f5a-8064-2b8703b7aab6	648	Alive	>=60	female	black or african american	Stage I	Serous cystadenocarcinoma, NOS	G3	NA	NO	Post (prior bilateral ovariectomy OR >12 mo since LMP with no prior hysterectomy)	0	648	648	0	648	0	648	0	Notassigned	490	NA	3.97538
TCGA-EO-A3AU-01A-21R-A19W-07	TCGA-EO-A3AU-01A	TCGA-EO-A3AU-01	TCGA-EO-A3AU	01A	34c34585-fae1-4b0b-934b-4950b557063a	1543	Alive	>=60	female	not reported	Stage II	Endometrioid adenocarcinoma, NOS	G3	34.6667	YES	Post (prior bilateral ovariectomy OR >12 mo since LMP with no prior hysterectomy)	0	1543	1178	1	1543	0	1543	0	Notassigned	454	NA	7.149
TCGA-BG-A18A-01A-21R-A12I-07	TCGA-BG-A18A-01A	TCGA-BG-A18A-01	TCGA-BG-A18A	01A	0b996a43-9c25-4313-971d-687f0ff7e133	426	Alive	>=60	female	white	Stage I	Endometrioid adenocarcinoma, NOS	G1	32.0073	NO	Post (prior bilateral ovariectomy OR >12 mo since LMP with no prior hysterectomy)	0	426	426	0	426	0	426	0	CN low	148	NA	5.5316
TCGA-B5-A0JZ-01A-11R-A040-07	TCGA-B5-A0JZ-01A	TCGA-B5-A0JZ-01	TCGA-B5-A0JZ	01A	f14a2c05-690d-440a-b609-3f843d4c30a1	2173	Alive	>=60	female	white	Stage III	Endometrioid adenocarcinoma, NOS	G3	33.1504	NO	Post (prior bilateral ovariectomy OR >12 mo since LMP with no prior hysterectomy)	0	2173	356	1	NA	NA	2173	0	MSI	626	NA	6.96541
TCGA-D1-A17C-01A-11R-A12I-07	TCGA-D1-A17C-01A	TCGA-D1-A17C-01	TCGA-D1-A17C	01A	c4466851-a97d-4bd4-9329-a75ecc915692	30	Alive	>=60	female	white	Stage I	Endometrioid adenocarcinoma, NOS	G1	31.2488	NO	Post (prior bilateral ovariectomy OR >12 mo since LMP with no prior hysterectomy)	0	30	30	0	30	0	30	0	CN low	485	NA	5.36422
TCGA-E6-A1LX-01A-11R-A14D-07	TCGA-E6-A1LX-01A	TCGA-E6-A1LX-01	TCGA-E6-A1LX	01A	b1b2c2c2-0b5d-4948-b019-8f27dd1e4d6a	711	Alive	<60	female	white	Stage I	Endometrioid adenocarcinoma, NOS	G3	NA	NO	Pre (<6 months since LMP AND no prior bilateral ovariectomy AND not on estrogen replacement)	0	711	711	0	711	0	711	0	Notassigned	157	NA	7.03917
TCGA-BK-A139-01A-11R-A118-07	TCGA-BK-A139-01A	TCGA-BK-A139-01	TCGA-BK-A139	01A	3eab23e9-4fbc-4acf-b9a8-9f5b613e3154	309	Dead	>=60	female	white	Stage I	Endometrioid adenocarcinoma, NOS	G3	24.8777	NO	Post (prior bilateral ovariectomy OR >12 mo since LMP with no prior hysterectomy)	1	943	684	1	NA	NA	943	1	CN high	431	NA	7.0274
TCGA-A5-A1OK-01A-11R-A14M-07	TCGA-A5-A1OK-01A	TCGA-A5-A1OK-01	TCGA-A5-A1OK	01A	30a85d1a-7022-4fa5-a908-ec0dca4fc202	917	Alive	>=60	female	white	Stage III	Endometrioid adenocarcinoma, NOS	G3	31.9559	YES	Post (prior bilateral ovariectomy OR >12 mo since LMP with no prior hysterectomy)	0	917	917	0	917	0	917	0	Notassigned	407	NA	6.49596
TCGA-D1-A16Q-01A-12R-A12I-07	TCGA-D1-A16Q-01A	TCGA-D1-A16Q-01	TCGA-D1-A16Q	01A	74c5f3e2-ba66-4d3e-8a44-6e97ede2ef22	324	Alive	<60	female	white	Stage II	Endometrioid adenocarcinoma, NOS	G2	39.5484	YES	Post (prior bilateral ovariectomy OR >12 mo since LMP with no prior hysterectomy)	0	324	324	0	324	0	324	0	CN low	395	NA	4.93494
TCGA-E6-A1M0-01A-11R-A144-07	TCGA-E6-A1M0-01A	TCGA-E6-A1M0-01	TCGA-E6-A1M0	01A	7914c6cf-464e-4e63-80f6-47f10cc90f35	1793	Alive	<60	female	white	Stage III	Endometrioid adenocarcinoma, NOS	G3	37.6536	NO	Post (prior bilateral ovariectomy OR >12 mo since LMP with no prior hysterectomy)	0	1793	1793	0	1793	0	1793	0	Notassigned	481	NA	7.34822
TCGA-BS-A0TE-01A-11R-A104-07	TCGA-BS-A0TE-01A	TCGA-BS-A0TE-01	TCGA-BS-A0TE	01A	2798a8ec-9cbb-490f-86ea-b91810385319	NA	Dead	<60	female	asian	Stage IV	Endometrioid adenocarcinoma, NOS	G3	32.2421	NO	Pre (<6 months since LMP AND no prior bilateral ovariectomy AND not on estrogen replacement)	1	146	58	1	NA	NA	146	1	MSI	287	NA	7.48692
TCGA-BG-A0MQ-01A-11R-A104-07	TCGA-BG-A0MQ-01A	TCGA-BG-A0MQ-01	TCGA-BG-A0MQ	01A	0c2dc588-b89c-4a9a-9230-670c6a6af744	1817	Alive	>=60	female	white	Stage I	Endometrioid adenocarcinoma, NOS	G1	37.0983	NA	Post (prior bilateral ovariectomy OR >12 mo since LMP with no prior hysterectomy)	0	1817	1817	0	NA	NA	1817	0	MSI	273	NA	5.94366
TCGA-AJ-A3NG-01A-11R-A22K-07	TCGA-AJ-A3NG-01A	TCGA-AJ-A3NG-01	TCGA-AJ-A3NG	01A	9e0d6f6d-1603-4a21-9106-220f85f05d4c	475	Alive	>=60	female	white	Stage II	Serous cystadenocarcinoma, NOS	G3	38.7097	NO	Post (prior bilateral ovariectomy OR >12 mo since LMP with no prior hysterectomy)	0	475	475	0	475	0	475	0	Notassigned	101	NA	6.97178
TCGA-B5-A0K0-01A-11R-A16W-07	TCGA-B5-A0K0-01A	TCGA-B5-A0K0-01	TCGA-B5-A0K0	01A	9460e172-628a-4cc0-bd66-ae2635b858bc	1478	Alive	<60	female	white	Stage I	Endometrioid adenocarcinoma, NOS	G1	49.6032	YES	Indeterminate (neither Pre or Postmenopausal)	0	1478	1478	0	1478	0	1478	0	CN low	422	NA	6.1474
TCGA-AX-A1CF-01A-11R-A137-07	TCGA-AX-A1CF-01A	TCGA-AX-A1CF-01	TCGA-AX-A1CF	01A	2fff27b4-5e6d-4928-ac2a-cd14cc7d914d	2337	Alive	>=60	female	white	Stage IV	Endometrioid adenocarcinoma, NOS	G3	35.1111	NA	NA	0	2337	875	1	NA	NA	2337	0	Notassigned	59	NA	6.88054
TCGA-A5-A0GJ-01A-11R-A040-07	TCGA-A5-A0GJ-01A	TCGA-A5-A0GJ-01	TCGA-A5-A0GJ	01A	f8498c1b-9fef-4915-96f9-3def89d585a6	2000	Alive	<60	female	white	Stage I	Endometrioid adenocarcinoma, NOS	G2	43.2835	NO	Post (prior bilateral ovariectomy OR >12 mo since LMP with no prior hysterectomy)	0	2000	12	1	12	1	2000	0	CN high	189	NA	6.30962
TCGA-BG-A0M3-01A-11R-A104-07	TCGA-BG-A0M3-01A	TCGA-BG-A0M3-01	TCGA-BG-A0M3	01A	891cdc8f-5bda-455c-81f7-cac85d470368	1071	Alive	>=60	female	white	Stage I	Endometrioid adenocarcinoma, NOS	G2	29.2969	NO	Post (prior bilateral ovariectomy OR >12 mo since LMP with no prior hysterectomy)	0	1071	1071	0	1071	0	1071	0	CN low	421	NA	6.59569
TCGA-5B-A90C-01A-11R-A37O-07	TCGA-5B-A90C-01A	TCGA-5B-A90C-01	TCGA-5B-A90C	01A	5734ffbf-7b87-4a66-9e28-71e283e1c06d	1202	Alive	>=60	female	black or african american	Stage I	Endometrioid adenocarcinoma, NOS	G2	39.2565	NA	Post (prior bilateral ovariectomy OR >12 mo since LMP with no prior hysterectomy)	0	1202	517	1	NA	NA	1202	0	Notassigned	572	NA	6.93502
TCGA-AJ-A3IA-01A-11R-A213-07	TCGA-AJ-A3IA-01A	TCGA-AJ-A3IA-01	TCGA-AJ-A3IA	01A	b5c14cec-8923-416d-a2d9-8202c9ddf561	633	Alive	>=60	female	white	Stage I	Serous cystadenocarcinoma, NOS	G3	23.5304	NO	Post (prior bilateral ovariectomy OR >12 mo since LMP with no prior hysterectomy)	0	633	633	0	633	0	633	0	Notassigned	299	NA	7.39837
TCGA-EY-A1GR-01A-11R-A13S-07	TCGA-EY-A1GR-01A	TCGA-EY-A1GR-01	TCGA-EY-A1GR	01A	66b391e7-dacd-4fe0-928e-bb98edf29b9d	536	Alive	>=60	female	black or african american	Stage I	Endometrioid adenocarcinoma, NOS	G3	34.1598	YES	Post (prior bilateral ovariectomy OR >12 mo since LMP with no prior hysterectomy)	0	536	536	0	536	0	536	0	Notassigned	582	NA	6.31952
TCGA-BG-A0VT-01A-11R-A10J-07	TCGA-BG-A0VT-01A	TCGA-BG-A0VT-01	TCGA-BG-A0VT	01A	1e35ac73-0f87-46b1-8a2f-66276bc9fa02	1568	Alive	<60	female	white	Stage III	Endometrioid adenocarcinoma, NOS	G2	49.827	NO	Pre (<6 months since LMP AND no prior bilateral ovariectomy AND not on estrogen replacement)	0	1568	1568	0	1568	0	1568	0	CN low	72	NA	6.93912
TCGA-BG-A0YV-01A-11R-A10J-07	TCGA-BG-A0YV-01A	TCGA-BG-A0YV-01	TCGA-BG-A0YV	01A	8d63fcda-9ae7-45ad-a94e-beb5859004ee	382	Alive	>=60	female	white	Stage III	Serous cystadenocarcinoma, NOS	G3	22.4766	NO	Post (prior bilateral ovariectomy OR >12 mo since LMP with no prior hysterectomy)	0	382	382	0	382	0	382	0	CN high	132	NA	6.8674
TCGA-DF-A2KS-01A-11R-A18M-07	TCGA-DF-A2KS-01A	TCGA-DF-A2KS-01	TCGA-DF-A2KS	01A	acc574a5-4c54-42b7-a60a-45017c7766a5	3318	Alive	>=60	female	not reported	Stage I	Endometrioid adenocarcinoma, NOS	G3	NA	NO	Post (prior bilateral ovariectomy OR >12 mo since LMP with no prior hysterectomy)	0	3318	2277	1	3318	0	3318	0	Notassigned	502	NA	6.41081
TCGA-AX-A06F-01A-11R-A00V-07	TCGA-AX-A06F-01A	TCGA-AX-A06F-01	TCGA-AX-A06F	01A	d81e80a3-8a10-4d42-81fd-3cebaa3a2c33	1748	Alive	<60	female	white	Stage IV	Endometrioid adenocarcinoma, NOS	G3	30.854	NA	Post (prior bilateral ovariectomy OR >12 mo since LMP with no prior hysterectomy)	0	1748	1748	0	NA	NA	1748	0	Notassigned	484	NA	5.33104
TCGA-A5-A0G9-01A-11R-A040-07	TCGA-A5-A0G9-01A	TCGA-A5-A0G9-01	TCGA-A5-A0G9	01A	4a86f9a1-e98b-4783-9e0f-8904997b0f89	2540	Alive	>=60	female	white	Stage I	Endometrioid adenocarcinoma, NOS	G3	27.7177	NO	Post (prior bilateral ovariectomy OR >12 mo since LMP with no prior hysterectomy)	0	2540	2540	0	2540	0	2540	0	MSI	199	NA	6.62773
TCGA-EY-A1GD-01A-11R-A13S-07	TCGA-EY-A1GD-01A	TCGA-EY-A1GD-01	TCGA-EY-A1GD	01A	93bbec66-e574-4c6a-96cc-24c4c1cb41a7	1639	Alive	<60	female	black or african american	Stage I	Endometrioid adenocarcinoma, NOS	G1	32.05	NA	Pre (<6 months since LMP AND no prior bilateral ovariectomy AND not on estrogen replacement)	0	1639	1639	0	1639	0	1639	0	Notassigned	363	NA	6.74858
TCGA-AP-A05N-01A-11R-A00V-07	TCGA-AP-A05N-01A	TCGA-AP-A05N-01	TCGA-AP-A05N	01A	4056b190-7cec-46d3-a4ee-6f76934ba58d	239	Dead	<60	female	white	Stage I	Endometrioid adenocarcinoma, NOS	G1	46.8679	NA	Pre (<6 months since LMP AND no prior bilateral ovariectomy AND not on estrogen replacement)	1	726	726	0	726	0	726	0	MSI	624	NA	6.56569
TCGA-A5-A0VO-01A-21R-A109-07	TCGA-A5-A0VO-01A	TCGA-A5-A0VO-01	TCGA-A5-A0VO	01A	1514f0e4-4726-47e1-af26-140ff7fb0490	364	Dead	>=60	female	white	Stage I	Endometrioid adenocarcinoma, NOS	G2	32.3685	NO	Post (prior bilateral ovariectomy OR >12 mo since LMP with no prior hysterectomy)	1	875	875	0	875	0	875	0	Notassigned	642	NA	5.70649
TCGA-AX-A3FV-01A-11R-A22K-07	TCGA-AX-A3FV-01A	TCGA-AX-A3FV-01	TCGA-AX-A3FV	01A	e53e9d32-8714-47b7-b345-c946ad2ccfcc	-6	Alive	>=60	female	white	Stage III	Endometrioid adenocarcinoma, NOS	G3	48.9093	NA	NA	0	0	0	0	NA	NA	0	0	Notassigned	579	NA	6.44377
TCGA-AJ-A8CT-01A-11R-A37O-07	TCGA-AJ-A8CT-01A	TCGA-AJ-A8CT-01	TCGA-AJ-A8CT	01A	8ec15c44-02be-4687-bce3-68f468452f6c	82	Alive	<60	female	black or african american	Stage I	Endometrioid adenocarcinoma, NOS	G1	42.2406	NA	Post (prior bilateral ovariectomy OR >12 mo since LMP with no prior hysterectomy)	0	82	82	0	82	0	82	0	Notassigned	79	NA	2.60418
TCGA-AX-A2HC-01A-11R-A17B-07	TCGA-AX-A2HC-01A	TCGA-AX-A2HC-01	TCGA-AX-A2HC	01A	b242d26d-5e52-4d99-816f-e1cae3a36917	1044	Alive	<60	female	black or african american	Stage III	Endometrioid adenocarcinoma, NOS	G3	47.2681	NA	NA	0	1044	756	1	756	1	1044	0	Notassigned	306	NA	7.46369
TCGA-D1-A1NX-01A-11R-A16F-07	TCGA-D1-A1NX-01A	TCGA-D1-A1NX-01	TCGA-D1-A1NX	01A	050131af-3dbe-4243-afb4-3d244b3c811f	555	Alive	>=60	female	white	Stage III	Serous cystadenocarcinoma, NOS	G3	34.4132	NO	Post (prior bilateral ovariectomy OR >12 mo since LMP with no prior hysterectomy)	0	555	476	1	476	1	555	0	CN high	180	NA	6.39839
TCGA-AX-A1CA-01A-12R-A137-07	TCGA-AX-A1CA-01A	TCGA-AX-A1CA-01	TCGA-AX-A1CA	01A	e8789595-7a45-497f-8d41-ef297d9b3378	974	Alive	>=60	female	black or african american	Stage I	Serous cystadenocarcinoma, NOS	G3	31.2386	NA	NA	0	974	974	0	NA	NA	974	0	Notassigned	322	NA	5.02436
TCGA-DI-A2QT-01A-12R-A19W-07	TCGA-DI-A2QT-01A	TCGA-DI-A2QT-01	TCGA-DI-A2QT	01A	134d5e37-f09a-4b4f-8525-d1a9bb892d16	NA	Dead	<60	female	american indian or alaska native	Stage III	Serous cystadenocarcinoma, NOS	G3	25.4767	NA	Post (prior bilateral ovariectomy OR >12 mo since LMP with no prior hysterectomy)	1	377	377	1	NA	NA	377	1	Notassigned	511	NA	6.25359
TCGA-B5-A11R-01A-11R-A118-07	TCGA-B5-A11R-01A	TCGA-B5-A11R-01	TCGA-B5-A11R	01A	d043230f-44b9-446f-9af3-da90894094d6	2349	Alive	<60	female	black or african american	Stage II	Endometrioid adenocarcinoma, NOS	G3	31.5334	NA	Post (prior bilateral ovariectomy OR >12 mo since LMP with no prior hysterectomy)	0	2349	2349	0	2349	0	2349	0	Notassigned	330	NA	6.84041
TCGA-A5-A3LP-01A-11R-A22K-07	TCGA-A5-A3LP-01A	TCGA-A5-A3LP-01	TCGA-A5-A3LP	01A	437aca11-9d03-4e9e-82d1-6acf2ccc8738	455	Alive	>=60	female	white	Stage I	Serous cystadenocarcinoma, NOS	G3	18.1955	NO	Post (prior bilateral ovariectomy OR >12 mo since LMP with no prior hysterectomy)	0	455	455	0	455	0	455	0	Notassigned	423	NA	7.71311
TCGA-EO-A22Y-01A-11R-A180-07	TCGA-EO-A22Y-01A	TCGA-EO-A22Y-01	TCGA-EO-A22Y	01A	6becdda4-cd0f-45ff-b993-f577338ed0c7	1567	Alive	>=60	female	white	Stage I	Endometrioid adenocarcinoma, NOS	G3	NA	NO	Post (prior bilateral ovariectomy OR >12 mo since LMP with no prior hysterectomy)	0	1567	1567	0	1567	0	1567	0	Notassigned	641	NA	5.80901
TCGA-D1-A16I-01A-11R-A12I-07	TCGA-D1-A16I-01A	TCGA-D1-A16I-01	TCGA-D1-A16I	01A	9ae6e738-0411-4974-925a-8eee9eebdb47	NA	Dead	>=60	female	white	Stage I	Serous cystadenocarcinoma, NOS	G3	31.6158	NO	Post (prior bilateral ovariectomy OR >12 mo since LMP with no prior hysterectomy)	1	350	350	0	350	0	350	0	CN high	506	NA	5.58824
TCGA-EY-A1GW-01A-22R-A13S-07	TCGA-EY-A1GW-01A	TCGA-EY-A1GW-01	TCGA-EY-A1GW	01A	3e40f0b9-3326-43b1-9fb3-0e6479955cb9	260	Dead	>=60	female	white	Stage IV	Endometrioid adenocarcinoma, NOS	G3	36.4848	NO	Post (prior bilateral ovariectomy OR >12 mo since LMP with no prior hysterectomy)	1	337	190	1	NA	NA	337	1	Notassigned	150	NA	7.37725
TCGA-AX-A060-01A-11R-A00V-07	TCGA-AX-A060-01A	TCGA-AX-A060-01	TCGA-AX-A060	01A	ea43f199-daca-48c9-941c-d8af399e2709	1075	Alive	>=60	female	american indian or alaska native	Stage I	Endometrioid adenocarcinoma, NOS	G3	32.7449	NA	Post (prior bilateral ovariectomy OR >12 mo since LMP with no prior hysterectomy)	0	1075	1075	0	1075	0	1075	0	MSI	533	NA	6.61501
TCGA-A5-A0R8-01A-11R-A104-07	TCGA-A5-A0R8-01A	TCGA-A5-A0R8-01	TCGA-A5-A0R8	01A	18ada3a8-1e1c-418e-91a2-8f315e995319	596	Alive	>=60	female	white	Stage I	Endometrioid adenocarcinoma, NOS	G2	24.2188	NO	Post (prior bilateral ovariectomy OR >12 mo since LMP with no prior hysterectomy)	0	596	42	1	42	1	596	0	CN low	614	NA	4.06319
TCGA-BK-A0CC-01A-21R-A277-07	TCGA-BK-A0CC-01A	TCGA-BK-A0CC-01	TCGA-BK-A0CC	01A	d87075e1-ac28-4d7c-84d9-ab7847b353db	1067	Alive	>=60	female	black or african american	Stage III	Serous cystadenocarcinoma, NOS	G3	31.1634	YES	Post (prior bilateral ovariectomy OR >12 mo since LMP with no prior hysterectomy)	0	1067	1010	1	1010	1	1067	0	CN high	634	NA	7.8277
TCGA-BG-A18B-01A-11R-A12I-07	TCGA-BG-A18B-01A	TCGA-BG-A18B-01	TCGA-BG-A18B	01A	a8e41ebe-7c5e-4fc9-a7a2-3c9c42066382	470	Alive	<60	female	white	Stage I	Endometrioid adenocarcinoma, NOS	G2	43.6599	NO	Peri (6-12 months since last menstrual period)	0	470	470	0	470	0	470	0	MSI	345	NA	6.21862
TCGA-B5-A1MY-01A-11R-A144-07	TCGA-B5-A1MY-01A	TCGA-B5-A1MY-01	TCGA-B5-A1MY	01A	3e3fd4dd-1a2c-49ca-bb92-b91e33ecc3f1	NA	Dead	>=60	female	black or african american	Stage III	Serous cystadenocarcinoma, NOS	G3	31.4318	NA	Post (prior bilateral ovariectomy OR >12 mo since LMP with no prior hysterectomy)	1	361	333	1	NA	NA	361	1	CN high	547	NA	7.24147
TCGA-AX-A05U-01A-11R-A00V-07	TCGA-AX-A05U-01A	TCGA-AX-A05U-01	TCGA-AX-A05U	01A	f7b21076-fac1-4cb4-85a1-d293504b88e8	903	Alive	<60	female	american indian or alaska native	Stage I	Endometrioid adenocarcinoma, NOS	G1	25.8065	YES	Post (prior bilateral ovariectomy OR >12 mo since LMP with no prior hysterectomy)	0	903	903	0	903	0	903	0	CN low	612	NA	6.59134
TCGA-EO-A3AV-01A-12R-A19W-07	TCGA-EO-A3AV-01A	TCGA-EO-A3AV-01	TCGA-EO-A3AV	01A	651885e8-5c08-40b1-87f9-016c5d2bc05e	1069	Alive	<60	female	not reported	Stage III	Endometrioid adenocarcinoma, NOS	G3	18.026	NO	Peri (6-12 months since last menstrual period)	0	1069	1069	0	1069	0	1069	0	Notassigned	530	NA	4.99738
TCGA-B5-A0K7-01A-11R-A104-07	TCGA-B5-A0K7-01A	TCGA-B5-A0K7-01	TCGA-B5-A0K7	01A	56ba32c5-5ff7-4376-9acd-2deeb552dac2	1933	Alive	>=60	female	white	Stage I	Endometrioid adenocarcinoma, NOS	G1	21.6128	NA	Post (prior bilateral ovariectomy OR >12 mo since LMP with no prior hysterectomy)	0	1933	322	1	322	1	1933	0	CN low	627	NA	4.82473
TCGA-BG-A0M2-01A-11R-A104-07	TCGA-BG-A0M2-01A	TCGA-BG-A0M2-01	TCGA-BG-A0M2	01A	bf9f6420-579f-40ed-9be5-dee24e8975cd	637	Alive	>=60	female	white	Stage I	Endometrioid adenocarcinoma, NOS	G2	26.9274	NO	Post (prior bilateral ovariectomy OR >12 mo since LMP with no prior hysterectomy)	0	637	637	0	637	0	637	0	CN low	438	NA	7.00859
TCGA-D1-A1O0-01A-11R-A17B-07	TCGA-D1-A1O0-01A	TCGA-D1-A1O0-01	TCGA-D1-A1O0	01A	bdb62a86-c15d-4505-92fc-91384aa2cfd2	63	Alive	>=60	female	white	Stage I	Endometrioid adenocarcinoma, NOS	G3	47.4664	YES	Post (prior bilateral ovariectomy OR >12 mo since LMP with no prior hysterectomy)	0	63	63	0	63	0	63	0	Notassigned	420	NA	7.01905
TCGA-B5-A11W-01A-12R-A118-07	TCGA-B5-A11W-01A	TCGA-B5-A11W-01	TCGA-B5-A11W	01A	fdf2cc9f-9399-4e7f-9fac-309cf00d928b	593	Alive	>=60	female	white	Stage I	Endometrioid adenocarcinoma, NOS	G2	38.3906	YES	Post (prior bilateral ovariectomy OR >12 mo since LMP with no prior hysterectomy)	0	593	593	0	593	0	593	0	CN low	129	NA	5.28148
TCGA-AX-A2H4-01A-21R-A18M-07	TCGA-AX-A2H4-01A	TCGA-AX-A2H4-01	TCGA-AX-A2H4	01A	acd579de-3565-4165-a580-39b669295867	NA	Dead	>=60	female	white	Stage III	Serous cystadenocarcinoma, NOS	G3	34.0785	YES	Post (prior bilateral ovariectomy OR >12 mo since LMP with no prior hysterectomy)	1	916	520	1	520	1	916	1	Notassigned	414	NA	7.06519
TCGA-A5-A0G1-01A-11R-A118-07	TCGA-A5-A0G1-01A	TCGA-A5-A0G1-01	TCGA-A5-A0G1	01A	96acf848-ff7c-422f-8c2e-616e340a751d	NA	Dead	>=60	female	white	Stage I	Serous cystadenocarcinoma, NOS	G3	20.9042	NO	Post (prior bilateral ovariectomy OR >12 mo since LMP with no prior hysterectomy)	1	3251	3251	0	3251	0	3251	0	Notassigned	585	NA	3.6603
TCGA-AJ-A2QO-01A-11R-A32Y-07	TCGA-AJ-A2QO-01A	TCGA-AJ-A2QO-01	TCGA-AJ-A2QO	01A	b5584f3f-9c14-4dbf-8981-7529d9cc9e48	92	Dead	>=60	female	white	Stage I	Endometrioid adenocarcinoma, NOS	G3	24.6097	NO	Post (prior bilateral ovariectomy OR >12 mo since LMP with no prior hysterectomy)	1	1045	1045	0	1045	0	1045	0	Notassigned	168	NA	7.11637
TCGA-BS-A0UJ-01A-12R-A104-07	TCGA-BS-A0UJ-01A	TCGA-BS-A0UJ-01	TCGA-BS-A0UJ	01A	6ce73d9b-3037-437d-862a-8f8b87a09fe0	2506	Alive	>=60	female	asian	Stage I	Endometrioid adenocarcinoma, NOS	G1	21.6441	YES	Post (prior bilateral ovariectomy OR >12 mo since LMP with no prior hysterectomy)	0	2506	2506	0	2506	0	2506	0	MSI	570	NA	5.49527
TCGA-5S-A9Q8-01A-11R-A40A-07	TCGA-5S-A9Q8-01A	TCGA-5S-A9Q8-01	TCGA-5S-A9Q8	01A	66330a7d-9744-4d05-9ec6-787ccb3b0f47	313	Alive	<60	female	black or african american	Stage III	Endometrioid adenocarcinoma, NOS	G2	32.7694	YES	NA	0	313	313	0	313	0	313	0	Notassigned	138	NA	6.53592
TCGA-D1-A163-01A-11R-A12I-07	TCGA-D1-A163-01A	TCGA-D1-A163-01	TCGA-D1-A163	01A	7321d9b7-5588-4ac1-a5ab-c4fcab93b849	991	Alive	<60	female	white	Stage III	Endometrioid adenocarcinoma, NOS	G2	38.1639	NO	Peri (6-12 months since last menstrual period)	0	991	223	1	223	1	991	0	MSI	112	NA	6.56819
TCGA-A5-A3LO-01A-11R-A22K-07	TCGA-A5-A3LO-01A	TCGA-A5-A3LO-01	TCGA-A5-A3LO	01A	ff48f222-2f62-4f5d-bb46-0c13a2d5afd8	776	Alive	>=60	female	white	Stage I	Endometrioid adenocarcinoma, NOS	G3	36.4938	NO	Post (prior bilateral ovariectomy OR >12 mo since LMP with no prior hysterectomy)	0	776	776	0	776	0	776	0	Notassigned	610	NA	7.91097
TCGA-D1-A0ZU-01A-11R-A10J-07	TCGA-D1-A0ZU-01A	TCGA-D1-A0ZU-01	TCGA-D1-A0ZU	01A	1075a6d9-44df-4720-ba41-8050ae748344	872	Alive	<60	female	white	Stage I	Endometrioid adenocarcinoma, secretory variant	G2	32.526	NO	Pre (<6 months since LMP AND no prior bilateral ovariectomy AND not on estrogen replacement)	0	872	872	0	872	0	872	0	CN low	367	NA	6.61716
TCGA-AX-A064-01A-11R-A00V-07	TCGA-AX-A064-01A	TCGA-AX-A064-01	TCGA-AX-A064	01A	a3990f5c-0761-42cf-8ddc-a81d23dc0f86	1517	Alive	>=60	female	white	Stage II	Endometrioid adenocarcinoma, NOS	G2	20.2395	NA	Post (prior bilateral ovariectomy OR >12 mo since LMP with no prior hysterectomy)	0	1517	1517	0	1517	0	1517	0	MSI	370	NA	5.79481
TCGA-EY-A214-01A-12R-A157-07	TCGA-EY-A214-01A	TCGA-EY-A214-01	TCGA-EY-A214	01A	3a4f25a2-0d9c-4a3b-9ed7-92cf599ad714	438	Alive	>=60	female	white	Stage III	Endometrioid adenocarcinoma, NOS	G3	34.5271	NO	Post (prior bilateral ovariectomy OR >12 mo since LMP with no prior hysterectomy)	0	438	438	0	438	0	438	0	Notassigned	435	NA	6.04736
TCGA-BS-A0TA-01A-11R-A104-07	TCGA-BS-A0TA-01A	TCGA-BS-A0TA-01	TCGA-BS-A0TA	01A	b1f5eedf-cafb-4585-b9aa-2e20f9f60066	714	Dead	<60	female	native hawaiian or other pacific islander	Stage IV	Endometrioid adenocarcinoma, NOS	G3	38.9543	YES	Post (prior bilateral ovariectomy OR >12 mo since LMP with no prior hysterectomy)	1	740	394	1	NA	NA	740	1	MSI	240	NA	4.3782
TCGA-AP-A1E0-01A-11R-A137-07	TCGA-AP-A1E0-01A	TCGA-AP-A1E0-01	TCGA-AP-A1E0	01A	c00f7120-4106-4f03-a967-e80a35e311ce	1832	Alive	<60	female	white	Stage III	Endometrioid adenocarcinoma, NOS	G2	23.634	NA	Pre (<6 months since LMP AND no prior bilateral ovariectomy AND not on estrogen replacement)	0	1832	1832	0	1832	0	1832	0	Notassigned	584	NA	5.76211
TCGA-EO-A3B0-01A-12R-A19W-07	TCGA-EO-A3B0-01A	TCGA-EO-A3B0-01	TCGA-EO-A3B0	01A	86a0a3ab-d3bc-4897-b6ed-97246cccc122	1412	Alive	<60	female	asian	Stage III	Endometrioid adenocarcinoma, NOS	G3	22.9398	NA	Indeterminate (neither Pre or Postmenopausal)	0	1412	1412	0	NA	NA	1412	0	Notassigned	467	NA	5.66403
TCGA-SL-A6J9-01A-11R-A31O-07	TCGA-SL-A6J9-01A	TCGA-SL-A6J9-01	TCGA-SL-A6J9	01A	df8bd4f7-b06d-4345-9ec3-aed43752ed0e	2	Alive	>=60	female	black or african american	Stage I	Endometrioid adenocarcinoma, NOS	G3	31.5537	NA	Post (prior bilateral ovariectomy OR >12 mo since LMP with no prior hysterectomy)	0	2	2	0	NA	NA	2	0	Notassigned	169	NA	4.73892
TCGA-BS-A0UA-01A-11R-A118-07	TCGA-BS-A0UA-01A	TCGA-BS-A0UA-01	TCGA-BS-A0UA	01A	09054fbb-1b70-48b6-bc41-1340862237e5	3495	Alive	>=60	female	white	Stage I	Endometrioid adenocarcinoma, NOS	G1	27.7008	NO	Post (prior bilateral ovariectomy OR >12 mo since LMP with no prior hysterectomy)	0	3495	520	1	520	1	3495	0	MSI	200	NA	6.14555
TCGA-EY-A1GV-01A-11R-A13S-07	TCGA-EY-A1GV-01A	TCGA-EY-A1GV-01	TCGA-EY-A1GV	01A	5e4c8011-ce02-45d1-ad28-0cdb5298e770	481	Alive	>=60	female	white	Stage III	Serous cystadenocarcinoma, NOS	G3	29.0174	YES	Post (prior bilateral ovariectomy OR >12 mo since LMP with no prior hysterectomy)	0	481	481	0	481	0	481	0	Notassigned	184	NA	6.6198
TCGA-AP-A0LH-01A-11R-A16W-07	TCGA-AP-A0LH-01A	TCGA-AP-A0LH-01	TCGA-AP-A0LH	01A	c18f0ac6-1a90-4786-978b-b23eba693b1f	NA	Dead	>=60	female	white	Stage I	Serous cystadenocarcinoma, NOS	G3	30.8596	NO	Post (prior bilateral ovariectomy OR >12 mo since LMP with no prior hysterectomy)	1	1106	302	1	302	1	1106	1	CN high	221	NA	5.53864
TCGA-EY-A547-01A-11R-A27V-07	TCGA-EY-A547-01A	TCGA-EY-A547-01	TCGA-EY-A547	01A	9f980b87-f3dc-48e9-9d65-a60d314642aa	545	Alive	>=60	female	black or african american	Stage I	Endometrioid adenocarcinoma, NOS	G3	39.1929	NA	Post (prior bilateral ovariectomy OR >12 mo since LMP with no prior hysterectomy)	0	545	545	0	545	0	545	0	Notassigned	88	NA	4.40957
TCGA-D1-A15Z-01A-11R-A118-07	TCGA-D1-A15Z-01A	TCGA-D1-A15Z-01	TCGA-D1-A15Z	01A	7241900e-f913-49b9-970f-74f571a3a47d	NA	Dead	>=60	female	white	Stage I	Endometrioid adenocarcinoma, NOS	G2	48.8281	YES	Post (prior bilateral ovariectomy OR >12 mo since LMP with no prior hysterectomy)	1	58	58	0	58	0	58	0	CN low	432	NA	5.42402
TCGA-B5-A11M-01A-11R-A118-07	TCGA-B5-A11M-01A	TCGA-B5-A11M-01	TCGA-B5-A11M	01A	12d35356-b491-4718-acc8-dc365d40581c	1362	Alive	<60	female	white	Stage I	Endometrioid adenocarcinoma, NOS	G1	59.3789	YES	Pre (<6 months since LMP AND no prior bilateral ovariectomy AND not on estrogen replacement)	0	1362	1362	0	1362	0	1362	0	Notassigned	81	NA	5.46735
TCGA-D1-A1NS-01A-11R-A14D-07	TCGA-D1-A1NS-01A	TCGA-D1-A1NS-01	TCGA-D1-A1NS	01A	73e00413-cf2b-40a7-b672-aa91127bf4a4	43	Alive	<60	female	white	Stage I	Endometrioid adenocarcinoma, NOS	G1	39.7677	NO	Post (prior bilateral ovariectomy OR >12 mo since LMP with no prior hysterectomy)	0	43	43	0	43	0	43	0	Notassigned	261	NA	5.4911
TCGA-BS-A0VI-01A-11R-A14D-07	TCGA-BS-A0VI-01A	TCGA-BS-A0VI-01	TCGA-BS-A0VI	01A	a825833a-556e-434e-9b0f-68e12579648d	2646	Alive	<60	female	white	Stage II	Endometrioid adenocarcinoma, NOS	G3	34.2504	NO	Post (prior bilateral ovariectomy OR >12 mo since LMP with no prior hysterectomy)	0	2646	2646	0	2646	0	2646	0	Notassigned	631	NA	6.79297
TCGA-AP-A1DH-01A-31R-A137-07	TCGA-AP-A1DH-01A	TCGA-AP-A1DH-01	TCGA-AP-A1DH	01A	bb208a71-73d0-49cf-8311-d88d612434cd	2180	Alive	>=60	female	white	Stage I	Endometrioid adenocarcinoma, NOS	G3	44.9972	NO	Post (prior bilateral ovariectomy OR >12 mo since LMP with no prior hysterectomy)	0	2180	2180	0	2180	0	2180	0	Notassigned	466	NA	4.62638
TCGA-AP-A1DP-01A-11R-A137-07	TCGA-AP-A1DP-01A	TCGA-AP-A1DP-01	TCGA-AP-A1DP	01A	0a238ed3-971c-48a5-b34d-eafa4e4ed448	NA	Dead	>=60	female	white	Stage I	Endometrioid adenocarcinoma, NOS	G2	33.2479	YES	Post (prior bilateral ovariectomy OR >12 mo since LMP with no prior hysterectomy)	1	1081	831	1	831	1	1081	1	Notassigned	292	NA	4.45283
TCGA-D1-A0ZR-01A-21R-A10J-07	TCGA-D1-A0ZR-01A	TCGA-D1-A0ZR-01	TCGA-D1-A0ZR	01A	c117f486-fdbe-4fc6-b73d-793353ec4051	17	Alive	<60	female	white	Stage I	Endometrioid adenocarcinoma, NOS	G2	42.9752	YES	Indeterminate (neither Pre or Postmenopausal)	0	17	17	0	17	0	17	0	CN low	408	NA	4.52426
TCGA-AX-A2H8-01A-11R-A17B-07	TCGA-AX-A2H8-01A	TCGA-AX-A2H8-01	TCGA-AX-A2H8	01A	32a463b4-1c84-483c-aac4-32abaffb79ff	1861	Alive	>=60	female	white	Stage I	Endometrioid adenocarcinoma, NOS	G3	44.1406	NA	Post (prior bilateral ovariectomy OR >12 mo since LMP with no prior hysterectomy)	0	1861	1861	0	1861	0	1861	0	Notassigned	119	NA	6.14352
TCGA-D1-A15V-01A-11R-A118-07	TCGA-D1-A15V-01A	TCGA-D1-A15V-01	TCGA-D1-A15V	01A	98f31bc2-2905-49bd-b2bb-c2fa5aa313b0	1201	Alive	>=60	female	white	Stage I	Serous cystadenocarcinoma, NOS	G3	26.9531	NO	Post (prior bilateral ovariectomy OR >12 mo since LMP with no prior hysterectomy)	0	1201	1201	0	1201	0	1201	0	CN high	242	NA	7.25479
TCGA-AX-A0IW-01A-11R-A040-07	TCGA-AX-A0IW-01A	TCGA-AX-A0IW-01	TCGA-AX-A0IW	01A	17af899d-b10b-4ed8-bfdf-e61393f5e983	1149	Alive	>=60	female	white	Stage III	Serous cystadenocarcinoma, NOS	G3	22.9591	NA	Post (prior bilateral ovariectomy OR >12 mo since LMP with no prior hysterectomy)	0	1149	1149	0	1149	0	1149	0	CN high	311	NA	6.02246
TCGA-D1-A17A-01A-11R-A12I-07	TCGA-D1-A17A-01A	TCGA-D1-A17A-01	TCGA-D1-A17A	01A	380f27a3-723d-4d2a-8515-d95c5bfd4381	48	Alive	<60	female	white	Stage II	Endometrioid adenocarcinoma, NOS	G3	32.9287	NO	Post (prior bilateral ovariectomy OR >12 mo since LMP with no prior hysterectomy)	0	48	48	0	48	0	48	0	MSI	371	NA	6.82224
TCGA-BG-A0LX-01A-11R-A16W-07	TCGA-BG-A0LX-01A	TCGA-BG-A0LX-01	TCGA-BG-A0LX	01A	d28e65a1-7f1c-45b2-b74f-0f7a1ff11787	614	Alive	<60	female	white	Stage I	Endometrioid adenocarcinoma, NOS	G2	33.218	NO	Post (prior bilateral ovariectomy OR >12 mo since LMP with no prior hysterectomy)	0	614	614	0	614	0	614	0	MSI	608	NA	6.10436
TCGA-AP-A0LE-01A-11R-A104-07	TCGA-AP-A0LE-01A	TCGA-AP-A0LE-01	TCGA-AP-A0LE	01A	acdfe319-b98d-4208-b528-6841ab3514b0	3357	Alive	<60	female	white	Stage I	Endometrioid adenocarcinoma, NOS	G3	29.2969	NA	Post (prior bilateral ovariectomy OR >12 mo since LMP with no prior hysterectomy)	0	3357	3357	0	3357	0	3357	0	MSI	89	NA	5.01268
TCGA-D1-A17F-01A-11R-A12I-07	TCGA-D1-A17F-01A	TCGA-D1-A17F-01	TCGA-D1-A17F	01A	cdda6aee-e393-4aac-a1a5-93fa7984ad66	39	Alive	>=60	female	white	Stage I	Endometrioid adenocarcinoma, NOS	G2	31.6456	NO	Post (prior bilateral ovariectomy OR >12 mo since LMP with no prior hysterectomy)	0	39	39	0	39	0	39	0	MSI	198	NA	4.2511
TCGA-AX-A3G8-01A-11R-A22K-07	TCGA-AX-A3G8-01A	TCGA-AX-A3G8-01	TCGA-AX-A3G8	01A	3229e473-fae5-4ea0-86ba-88958beb8e06	36	Alive	>=60	female	white	Stage I	Endometrioid adenocarcinoma, NOS	G3	25.1532	NA	Post (prior bilateral ovariectomy OR >12 mo since LMP with no prior hysterectomy)	0	36	36	0	NA	NA	36	0	Notassigned	340	NA	3.75228
TCGA-AX-A1CR-01A-12R-A137-07	TCGA-AX-A1CR-01A	TCGA-AX-A1CR-01	TCGA-AX-A1CR	01A	c2a6ca43-0e81-42fc-8619-3e2f1bf2469f	701	Alive	>=60	female	white	Stage II	Serous cystadenocarcinoma, NOS	G3	35.629	NA	Post (prior bilateral ovariectomy OR >12 mo since LMP with no prior hysterectomy)	0	701	701	0	NA	NA	701	0	Notassigned	94	NA	7.18156
TCGA-D1-A17H-01A-11R-A12I-07	TCGA-D1-A17H-01A	TCGA-D1-A17H-01	TCGA-D1-A17H	01A	a8bb4e74-6afc-4697-aeb2-f9e7ba2244a7	852	Alive	>=60	female	white	Stage I	Endometrioid adenocarcinoma, NOS	G1	34.4222	NO	Post (prior bilateral ovariectomy OR >12 mo since LMP with no prior hysterectomy)	0	852	852	0	852	0	852	0	MSI	462	NA	6.36852
TCGA-FI-A2CX-01A-11R-A17B-07	TCGA-FI-A2CX-01A	TCGA-FI-A2CX-01	TCGA-FI-A2CX	01A	640af165-9574-4e29-a6ba-2d04cbf22c5d	2031	Alive	>=60	female	white	Stage I	Endometrioid adenocarcinoma, NOS	G3	21.6441	NA	Post (prior bilateral ovariectomy OR >12 mo since LMP with no prior hysterectomy)	0	2031	2031	0	2031	0	2031	0	Notassigned	419	NA	5.13436
TCGA-AJ-A3BF-01A-11R-A213-07	TCGA-AJ-A3BF-01A	TCGA-AJ-A3BF-01	TCGA-AJ-A3BF	01A	e19310ac-8dda-4550-8f1e-6c393edac919	551	Alive	>=60	female	white	Stage III	Papillary serous cystadenocarcinoma	G3	39.1003	NO	Post (prior bilateral ovariectomy OR >12 mo since LMP with no prior hysterectomy)	0	551	384	1	384	1	551	0	Notassigned	274	NA	6.38906
TCGA-EY-A2ON-01A-21R-A18M-07	TCGA-EY-A2ON-01A	TCGA-EY-A2ON-01	TCGA-EY-A2ON	01A	46d107c6-2399-4c65-8b5c-5b21fd26896d	409	Dead	>=60	female	black or african american	Stage IV	Serous cystadenocarcinoma, NOS	G3	36.7309	NO	Post (prior bilateral ovariectomy OR >12 mo since LMP with no prior hysterectomy)	1	610	226	1	NA	NA	610	1	Notassigned	478	NA	7.20744
TCGA-AX-A2HF-01A-11R-A17B-07	TCGA-AX-A2HF-01A	TCGA-AX-A2HF-01	TCGA-AX-A2HF	01A	56ae28a1-740a-4c08-8ca5-2e88b449d741	848	Alive	>=60	female	white	Stage I	Serous cystadenocarcinoma, NOS	G3	28.3987	NA	Post (prior bilateral ovariectomy OR >12 mo since LMP with no prior hysterectomy)	0	848	848	0	848	0	848	0	CN high	442	NA	7.52747
TCGA-JU-AAVI-01A-11R-A40A-07	TCGA-JU-AAVI-01A	TCGA-JU-AAVI-01	TCGA-JU-AAVI	01A	f7209da3-722b-4ac3-b957-ecb7402c5121	236	Dead	>=60	female	black or african american	Stage III	Serous cystadenocarcinoma, NOS	G3	53.7778	NO	Post (prior bilateral ovariectomy OR >12 mo since LMP with no prior hysterectomy)	1	540	505	1	505	1	540	1	Notassigned	152	NA	5.87478
TCGA-BG-A0MS-01A-11R-A104-07	TCGA-BG-A0MS-01A	TCGA-BG-A0MS-01	TCGA-BG-A0MS	01A	adda4f57-c727-4e28-a719-9745a44ac099	1882	Alive	<60	female	white	Stage III	Endometrioid adenocarcinoma, NOS	G3	25.3906	NA	Post (prior bilateral ovariectomy OR >12 mo since LMP with no prior hysterectomy)	0	1882	1882	0	1882	0	1882	0	CN low	103	NA	5.96823
TCGA-AJ-A3NH-01A-11R-A22K-07	TCGA-AJ-A3NH-01A	TCGA-AJ-A3NH-01	TCGA-AJ-A3NH	01A	78f27be3-fbd5-4847-b2a3-b9700c512353	1	Dead	>=60	female	white	Stage I	Serous cystadenocarcinoma, NOS	G3	24.7676	NO	Post (prior bilateral ovariectomy OR >12 mo since LMP with no prior hysterectomy)	1	310	310	0	310	0	310	0	Notassigned	402	NA	7.33109
TCGA-KP-A3W1-01A-11R-A22K-07	TCGA-KP-A3W1-01A	TCGA-KP-A3W1-01	TCGA-KP-A3W1	01A	50329f23-1aae-44b9-bf88-4aba63f445a7	288	Alive	>=60	female	not reported	Stage I	Serous cystadenocarcinoma, NOS	G3	22.8374	NA	Post (prior bilateral ovariectomy OR >12 mo since LMP with no prior hysterectomy)	0	288	288	0	288	0	288	0	Notassigned	304	NA	6.78806
TCGA-FI-A2D0-01A-11R-A17B-07	TCGA-FI-A2D0-01A	TCGA-FI-A2D0-01	TCGA-FI-A2D0	01A	23724e26-dcba-4d15-8483-3e23b6f8bbab	1213	Alive	<60	female	white	Stage I	Endometrioid adenocarcinoma, NOS	G3	54.0779	NA	Peri (6-12 months since last menstrual period)	0	1213	1213	0	1213	0	1213	0	Notassigned	266	NA	5.62276
TCGA-A5-A0GR-01A-11R-A118-07	TCGA-A5-A0GR-01A	TCGA-A5-A0GR-01	TCGA-A5-A0GR	01A	9d836659-e290-4424-bc0a-c2205355367b	1120	Alive	>=60	female	black or african american	Stage I	Endometrioid adenocarcinoma, NOS	G2	28.089	YES	Post (prior bilateral ovariectomy OR >12 mo since LMP with no prior hysterectomy)	0	1120	1120	0	1120	0	1120	0	Notassigned	518	NA	7.21829
TCGA-B5-A11F-01A-11R-A10J-07	TCGA-B5-A11F-01A	TCGA-B5-A11F-01	TCGA-B5-A11F	01A	646acf23-d998-46bc-a5cc-998c7cff6924	5651	Alive	<60	female	white	Stage I	Endometrioid adenocarcinoma, NOS	G2	NA	NO	Post (prior bilateral ovariectomy OR >12 mo since LMP with no prior hysterectomy)	0	5651	1610	1	1610	1	5651	0	CN low	536	NA	5.62187
TCGA-D1-A3JQ-01A-11R-A22K-07	TCGA-D1-A3JQ-01A	TCGA-D1-A3JQ-01	TCGA-D1-A3JQ	01A	b8fd6ee1-e7c8-4c43-aaa7-bbfbfde16cd2	526	Alive	>=60	female	white	Stage III	Serous cystadenocarcinoma, NOS	G3	46.6803	NO	Post (prior bilateral ovariectomy OR >12 mo since LMP with no prior hysterectomy)	0	526	526	0	526	0	526	0	Notassigned	171	NA	7.11655
TCGA-KP-A3W0-01A-21R-A22K-07	TCGA-KP-A3W0-01A	TCGA-KP-A3W0-01	TCGA-KP-A3W0	01A	a3570e0a-7d74-46b3-8087-414c99e824c8	404	Alive	>=60	female	not reported	Stage I	Serous cystadenocarcinoma, NOS	G3	35.8177	NA	Post (prior bilateral ovariectomy OR >12 mo since LMP with no prior hysterectomy)	0	404	404	0	404	0	404	0	Notassigned	339	NA	7.25697
TCGA-AJ-A3EK-01A-11R-A19W-07	TCGA-AJ-A3EK-01A	TCGA-AJ-A3EK-01	TCGA-AJ-A3EK	01A	72c06eb9-7cfc-444a-a0af-f300ddcf2704	446	Alive	<60	female	white	Stage I	Endometrioid adenocarcinoma, NOS	G3	24.3418	NO	Peri (6-12 months since last menstrual period)	0	446	446	0	446	0	446	0	Notassigned	373	NA	6.8583
TCGA-B5-A121-01A-31R-A118-07	TCGA-B5-A121-01A	TCGA-B5-A121-01	TCGA-B5-A121	01A	bfcc7d54-3213-4263-a8f0-0479eccb4da0	504	Alive	<60	female	white	Stage III	Endometrioid adenocarcinoma, NOS	G1	29.3848	NA	Post (prior bilateral ovariectomy OR >12 mo since LMP with no prior hysterectomy)	0	504	504	0	504	0	504	0	CN low	293	NA	4.85785
TCGA-B5-A11J-01A-11R-A118-07	TCGA-B5-A11J-01A	TCGA-B5-A11J-01	TCGA-B5-A11J	01A	3f41f75a-ffc8-48f1-923d-87fd44c28aff	1656	Alive	>=60	female	white	Stage I	Endometrioid adenocarcinoma, NOS	G2	NA	YES	Post (prior bilateral ovariectomy OR >12 mo since LMP with no prior hysterectomy)	0	1656	1656	0	1656	0	1656	0	MSI	342	NA	6.86686
TCGA-AX-A3FW-01A-11R-A22K-07	TCGA-AX-A3FW-01A	TCGA-AX-A3FW-01	TCGA-AX-A3FW	01A	8a602089-2afc-49de-9fb7-e2476af3a59a	17	Alive	>=60	female	white	Stage I	Endometrioid adenocarcinoma, NOS	G3	30.1194	NA	Post (prior bilateral ovariectomy OR >12 mo since LMP with no prior hysterectomy)	0	17	17	0	NA	NA	17	0	Notassigned	237	NA	7.07984
TCGA-BG-A0YU-01A-21R-A10J-07	TCGA-BG-A0YU-01A	TCGA-BG-A0YU-01	TCGA-BG-A0YU	01A	e90a9fec-4e4a-4658-aa64-7213980dbba7	451	Alive	<60	female	white	Stage I	Endometrioid adenocarcinoma, NOS	G1	43.4095	NO	Pre (<6 months since LMP AND no prior bilateral ovariectomy AND not on estrogen replacement)	0	451	451	0	451	0	451	0	CN low	203	NA	6.27409
TCGA-EY-A1GH-01A-11R-A13S-07	TCGA-EY-A1GH-01A	TCGA-EY-A1GH-01	TCGA-EY-A1GH	01A	eb949a80-5b60-4eb4-ae9e-e1cbf558722b	710	Alive	>=60	female	white	Stage I	Endometrioid adenocarcinoma, NOS	G2	40.4844	NO	Post (prior bilateral ovariectomy OR >12 mo since LMP with no prior hysterectomy)	0	710	710	0	710	0	710	0	Notassigned	495	NA	6.52158
TCGA-AP-A059-01A-21R-A118-07	TCGA-AP-A059-01A	TCGA-AP-A059-01	TCGA-AP-A059	01A	f069599f-19ca-44eb-b0cb-52eeefc35b82	1461	Alive	>=60	female	white	Stage I	Endometrioid adenocarcinoma, NOS	G3	38.6719	NA	Post (prior bilateral ovariectomy OR >12 mo since LMP with no prior hysterectomy)	0	1461	1461	0	1461	0	1461	0	POLE	433	NA	5.9246
TCGA-A5-A0GG-01A-11R-A118-07	TCGA-A5-A0GG-01A	TCGA-A5-A0GG-01	TCGA-A5-A0GG	01A	a9df4e32-bac0-4fd8-a742-9d3bcc8d8837	3762	Alive	>=60	female	black or african american	Stage I	Endometrioid adenocarcinoma, NOS	G1	25	NO	Post (prior bilateral ovariectomy OR >12 mo since LMP with no prior hysterectomy)	0	3762	3762	0	3762	0	3762	0	Notassigned	372	NA	5.53885
TCGA-AJ-A8CW-01A-11R-A37O-07	TCGA-AJ-A8CW-01A	TCGA-AJ-A8CW-01	TCGA-AJ-A8CW	01A	47de1431-6475-4db5-9a56-63c3650b2356	4	Alive	>=60	female	black or african american	Stage I	Endometrioid adenocarcinoma, NOS	G2	47.4773	NA	Post (prior bilateral ovariectomy OR >12 mo since LMP with no prior hysterectomy)	0	4	4	0	NA	NA	4	0	Notassigned	234	NA	5.72394
TCGA-SJ-A6ZJ-01A-12R-A34R-07	TCGA-SJ-A6ZJ-01A	TCGA-SJ-A6ZJ-01	TCGA-SJ-A6ZJ	01A	245a08d4-fcda-4bbf-b213-6e815d914e1d	556	Alive	>=60	female	black or african american	Stage I	Endometrioid adenocarcinoma, NOS	G2	46.7687	NO	Post (prior bilateral ovariectomy OR >12 mo since LMP with no prior hysterectomy)	0	556	556	0	556	0	556	0	Notassigned	444	NA	4.75792
TCGA-EO-A22U-01A-11R-A180-07	TCGA-EO-A22U-01A	TCGA-EO-A22U-01	TCGA-EO-A22U	01A	0a540449-152b-4a8a-b4c1-73d9a8a712da	1407	Alive	>=60	female	white	Stage I	Endometrioid adenocarcinoma, NOS	G3	26.2222	NO	Post (prior bilateral ovariectomy OR >12 mo since LMP with no prior hysterectomy)	0	1407	1407	0	1407	0	1407	0	Notassigned	166	NA	7.67778
TCGA-EY-A1GL-01A-11R-A13S-07	TCGA-EY-A1GL-01A	TCGA-EY-A1GL-01	TCGA-EY-A1GL	01A	32ffdfa3-91d3-4583-811f-40752d73182e	1014	Alive	<60	female	white	Stage II	Endometrioid adenocarcinoma, NOS	G2	24.3911	NA	Post (prior bilateral ovariectomy OR >12 mo since LMP with no prior hysterectomy)	0	1014	1014	0	1014	0	1014	0	Notassigned	92	NA	7.17032
TCGA-A5-A1OH-01A-21R-A22K-07	TCGA-A5-A1OH-01A	TCGA-A5-A1OH-01	TCGA-A5-A1OH	01A	81f8bb11-911d-4c35-b636-6d2bd272d94c	1105	Alive	>=60	female	white	Stage III	Serous cystadenocarcinoma, NOS	G3	24.5578	NO	Post (prior bilateral ovariectomy OR >12 mo since LMP with no prior hysterectomy)	0	1105	1105	0	1105	0	1105	0	Notassigned	483	NA	12
TCGA-BG-A0RY-01A-11R-A104-07	TCGA-BG-A0RY-01A	TCGA-BG-A0RY-01	TCGA-BG-A0RY	01A	16dc7ba3-504b-4fa1-8c04-78c1e9678de9	469	Alive	>=60	female	white	Stage I	Endometrioid adenocarcinoma, NOS	G2	40.8304	NO	Post (prior bilateral ovariectomy OR >12 mo since LMP with no prior hysterectomy)	0	469	469	0	469	0	469	0	CN low	531	NA	6.68767
TCGA-AP-A0LV-01A-11R-A040-07	TCGA-AP-A0LV-01A	TCGA-AP-A0LV-01	TCGA-AP-A0LV	01A	4999a004-b9d4-4f1a-95a9-24ba6c2888ad	763	Alive	<60	female	white	Stage I	Endometrioid adenocarcinoma, NOS	G1	32.8947	NA	Pre (<6 months since LMP AND no prior bilateral ovariectomy AND not on estrogen replacement)	0	763	763	0	763	0	763	0	CN low	575	NA	5.52746
TCGA-AX-A3FS-01A-11R-A22K-07	TCGA-AX-A3FS-01A	TCGA-AX-A3FS-01	TCGA-AX-A3FS	01A	0c140462-f26e-4d98-b49d-17a6af669919	7	Alive	>=60	female	white	Stage I	Endometrioid adenocarcinoma, NOS	G3	50.722	NA	Post (prior bilateral ovariectomy OR >12 mo since LMP with no prior hysterectomy)	0	7	7	0	NA	NA	7	0	Notassigned	64	NA	6.11024
TCGA-EY-A549-01A-11R-A27V-07	TCGA-EY-A549-01A	TCGA-EY-A549-01	TCGA-EY-A549	01A	556c5d88-4709-41d1-8bc1-c2f383c1e3ba	605	Alive	>=60	female	black or african american	Stage I	Endometrioid adenocarcinoma, NOS	G3	27.1809	NA	Post (prior bilateral ovariectomy OR >12 mo since LMP with no prior hysterectomy)	0	605	605	0	605	0	605	0	Notassigned	257	NA	6.97157
TCGA-BS-A0TI-01A-11R-A104-07	TCGA-BS-A0TI-01A	TCGA-BS-A0TI-01	TCGA-BS-A0TI	01A	547667b4-173c-4ead-b64d-b0d374dbd0e7	1882	Alive	>=60	female	white	Stage I	Endometrioid adenocarcinoma, NOS	G3	22.2063	NO	Post (prior bilateral ovariectomy OR >12 mo since LMP with no prior hysterectomy)	0	1882	1882	0	1882	0	1882	0	CN high	319	NA	5.76101
TCGA-EY-A1GX-01A-12R-A13S-07	TCGA-EY-A1GX-01A	TCGA-EY-A1GX-01	TCGA-EY-A1GX	01A	339ffa9f-b161-4793-83dc-f1a1485600f9	197	Dead	>=60	female	white	Stage III	Endometrioid adenocarcinoma, NOS	G2	26.9531	NA	Post (prior bilateral ovariectomy OR >12 mo since LMP with no prior hysterectomy)	1	1127	743	1	743	1	1127	0	Notassigned	351	NA	6.63726
TCGA-EO-A3B1-01A-12R-A19W-07	TCGA-EO-A3B1-01A	TCGA-EO-A3B1-01	TCGA-EO-A3B1	01A	7e3073c9-e3d4-4a08-89b4-24528e04804e	820	Alive	>=60	female	not reported	Stage I	Serous cystadenocarcinoma, NOS	G3	32.1799	NO	Post (prior bilateral ovariectomy OR >12 mo since LMP with no prior hysterectomy)	0	820	820	0	820	0	820	0	Notassigned	172	NA	6.19855
TCGA-FI-A2EU-01A-11R-A17B-07	TCGA-FI-A2EU-01A	TCGA-FI-A2EU-01	TCGA-FI-A2EU	01A	920c2cf9-7811-4330-a17a-fcd12da4b654	2941	Alive	>=60	female	not reported	Stage I	Serous cystadenocarcinoma, NOS	G3	32.9507	YES	Post (prior bilateral ovariectomy OR >12 mo since LMP with no prior hysterectomy)	0	2941	2941	0	2941	0	2941	0	Notassigned	479	NA	8.0944
TCGA-AJ-A5DW-01A-11R-A27V-07	TCGA-AJ-A5DW-01A	TCGA-AJ-A5DW-01	TCGA-AJ-A5DW	01A	f9131fd7-55e6-49d0-9de0-fd7ba1930a08	390	Alive	<60	female	black or african american	Stage I	Endometrioid adenocarcinoma, NOS	G2	39.0835	NO	Post (prior bilateral ovariectomy OR >12 mo since LMP with no prior hysterectomy)	0	390	390	0	390	0	390	0	Notassigned	183	NA	7.72118
TCGA-EY-A1GI-01A-11R-A13S-07	TCGA-EY-A1GI-01A	TCGA-EY-A1GI-01	TCGA-EY-A1GI	01A	06b9f277-ecaf-4f26-9992-b2b343c64592	710	Alive	<60	female	white	Stage I	Endometrioid adenocarcinoma, NOS	G2	25.3444	NO	Pre (<6 months since LMP AND no prior bilateral ovariectomy AND not on estrogen replacement)	0	710	710	0	710	0	710	0	Notassigned	57	NA	7.41372
TCGA-EC-A24G-01A-11R-A16F-07	TCGA-EC-A24G-01A	TCGA-EC-A24G-01	TCGA-EC-A24G	01A	026f4587-5b37-4312-a374-c46ee36829ab	511	Alive	<60	female	white	Stage II	Endometrioid adenocarcinoma, NOS	G3	42.458	NO	Pre (<6 months since LMP AND no prior bilateral ovariectomy AND not on estrogen replacement)	0	511	511	0	511	0	511	0	Notassigned	289	NA	5.98183
TCGA-D1-A165-01A-11R-A12I-07	TCGA-D1-A165-01A	TCGA-D1-A165-01	TCGA-D1-A165	01A	d705d53d-7b72-4a4c-b0fb-5c8cb551e634	20	Alive	>=60	female	white	Stage III	Endometrioid adenocarcinoma, NOS	G1	26.556	NO	Post (prior bilateral ovariectomy OR >12 mo since LMP with no prior hysterectomy)	0	20	20	0	20	0	20	0	CN low	616	NA	6.52614
TCGA-AX-A1C8-01A-11R-A137-07	TCGA-AX-A1C8-01A	TCGA-AX-A1C8-01	TCGA-AX-A1C8	01A	1c3782e0-ef74-4e89-ba39-07b30cd4afad	776	Alive	>=60	female	white	Stage III	Serous cystadenocarcinoma, NOS	G3	27.1203	NA	Post (prior bilateral ovariectomy OR >12 mo since LMP with no prior hysterectomy)	0	776	776	0	NA	NA	776	0	CN high	93	NA	5.92863
TCGA-4E-A92E-01A-11R-A37O-07	TCGA-4E-A92E-01A	TCGA-4E-A92E-01	TCGA-4E-A92E	01A	4d4134d3-87a8-449a-a6e4-587f1cfebdac	13	Alive	<60	female	black or african american	Stage I	Endometrioid adenocarcinoma, NOS	G1	28.959	NO	Post (prior bilateral ovariectomy OR >12 mo since LMP with no prior hysterectomy)	0	13	13	0	13	0	13	0	Notassigned	516	NA	7.12842
TCGA-EO-A22S-01A-11R-A18M-07	TCGA-EO-A22S-01A	TCGA-EO-A22S-01	TCGA-EO-A22S	01A	eae662fc-ac62-4d3e-adbe-d8f7dafaac03	1872	Alive	<60	female	not reported	Stage I	Endometrioid adenocarcinoma, NOS	G3	34.5168	NO	Post (prior bilateral ovariectomy OR >12 mo since LMP with no prior hysterectomy)	0	1872	1872	0	1872	0	1872	0	Notassigned	535	NA	6.22057
TCGA-B5-A0K8-01A-11R-A14M-07	TCGA-B5-A0K8-01A	TCGA-B5-A0K8-01	TCGA-B5-A0K8	01A	f4580f79-776a-4263-96f8-8125df218087	847	Alive	>=60	female	white	Stage I	Serous cystadenocarcinoma, NOS	G3	23.8281	NA	Post (prior bilateral ovariectomy OR >12 mo since LMP with no prior hysterectomy)	0	847	847	0	847	0	847	0	CN high	399	NA	5.95135
TCGA-EY-A210-01A-11R-A157-07	TCGA-EY-A210-01A	TCGA-EY-A210-01	TCGA-EY-A210	01A	da6795f9-c2c4-449e-821b-cea5e4e20cb0	383	Alive	>=60	female	black or african american	Stage III	Serous cystadenocarcinoma, NOS	G3	26.2227	NO	Post (prior bilateral ovariectomy OR >12 mo since LMP with no prior hysterectomy)	0	383	383	0	383	0	383	0	Notassigned	248	NA	6.68678
TCGA-AX-A3FZ-01A-11R-A22K-07	TCGA-AX-A3FZ-01A	TCGA-AX-A3FZ-01	TCGA-AX-A3FZ	01A	7bbee063-8892-4e22-add3-77bfabbfd0ad	6	Alive	<60	female	white	Stage III	Endometrioid adenocarcinoma, NOS	G3	48.9093	NA	NA	0	6	6	0	NA	NA	6	0	Notassigned	404	NA	6.45596
TCGA-EY-A1H0-01A-11R-A13S-07	TCGA-EY-A1H0-01A	TCGA-EY-A1H0-01	TCGA-EY-A1H0	01A	86f3d378-0e63-4a01-b485-b23246eac9b4	588	Alive	<60	female	black or african american	Stage III	Endometrioid adenocarcinoma, NOS	G2	33.8741	YES	Post (prior bilateral ovariectomy OR >12 mo since LMP with no prior hysterectomy)	0	588	588	0	NA	NA	588	0	Notassigned	602	NA	4.42453
TCGA-AX-A06J-01A-11R-A00V-07	TCGA-AX-A06J-01A	TCGA-AX-A06J-01	TCGA-AX-A06J	01A	6547f9b3-6299-48a8-bd2f-729cb5e17f79	913	Alive	>=60	female	white	Stage I	Endometrioid adenocarcinoma, NOS	G3	45.9087	NA	Post (prior bilateral ovariectomy OR >12 mo since LMP with no prior hysterectomy)	0	913	913	0	913	0	913	0	Notassigned	581	NA	4.4334
TCGA-BG-A220-01A-11R-A157-07	TCGA-BG-A220-01A	TCGA-BG-A220-01	TCGA-BG-A220	01A	dffef1f3-64ff-4272-9290-ae77b1ab8409	434	Alive	>=60	female	white	Stage I	Endometrioid adenocarcinoma, NOS	G3	NA	YES	NA	0	434	434	0	434	0	434	0	Notassigned	629	NA	6.28482
TCGA-AP-A0LL-01A-12R-A104-07	TCGA-AP-A0LL-01A	TCGA-AP-A0LL-01	TCGA-AP-A0LL	01A	1f986941-841d-44d4-95f9-c3d4fcb71c04	2554	Alive	<60	female	white	Stage I	Endometrioid adenocarcinoma, NOS	G1	27.7767	NA	Post (prior bilateral ovariectomy OR >12 mo since LMP with no prior hysterectomy)	0	2554	790	1	790	1	2554	0	CN low	604	NA	6.75094
TCGA-D1-A16N-01A-11R-A12I-07	TCGA-D1-A16N-01A	TCGA-D1-A16N-01	TCGA-D1-A16N	01A	61883003-3126-4d8a-aa90-3d9f8725683b	945	Alive	<60	female	white	Stage III	Endometrioid adenocarcinoma, NOS	G3	37.0447	YES	Peri (6-12 months since last menstrual period)	0	945	945	0	945	0	945	0	MSI	96	NA	6.38634
TCGA-D1-A102-01A-11R-A10J-07	TCGA-D1-A102-01A	TCGA-D1-A102-01	TCGA-D1-A102	01A	89e9e5fd-875b-4574-81f8-016eb83d32d1	135	Alive	<60	female	white	Stage I	Endometrioid adenocarcinoma, NOS	G2	38.5052	YES	Peri (6-12 months since last menstrual period)	0	135	135	0	135	0	135	0	CN low	523	NA	5.70193
TCGA-AP-A1DQ-01A-11R-A137-07	TCGA-AP-A1DQ-01A	TCGA-AP-A1DQ-01	TCGA-AP-A1DQ	01A	a44cc07f-e677-4d4f-a7b8-63bdc310d195	1276	Dead	>=60	female	white	Stage III	Serous cystadenocarcinoma, NOS	G3	22.5827	NO	Post (prior bilateral ovariectomy OR >12 mo since LMP with no prior hysterectomy)	1	1423	905	1	905	1	1423	1	CN high	589	NA	7.53835
TCGA-A5-A1OG-01A-11R-A14D-07	TCGA-A5-A1OG-01A	TCGA-A5-A1OG-01	TCGA-A5-A1OG	01A	23f73021-f645-42d2-a7a6-73ac5253b4b3	348	Dead	>=60	female	asian	Stage III	Serous cystadenocarcinoma, NOS	G3	25.6369	YES	Post (prior bilateral ovariectomy OR >12 mo since LMP with no prior hysterectomy)	1	973	337	1	337	1	973	1	Notassigned	529	NA	6.54362
TCGA-AX-A3G7-01A-12R-A213-07	TCGA-AX-A3G7-01A	TCGA-AX-A3G7-01	TCGA-AX-A3G7	01A	05bbb953-4b8b-45da-861a-3044c0ba4716	9	Alive	>=60	female	white	Stage IV	Serous cystadenocarcinoma, NOS	G3	31.2026	NA	NA	0	9	9	0	NA	NA	9	0	Notassigned	107	NA	7.07716
TCGA-D1-A3DH-01A-11R-A19W-07	TCGA-D1-A3DH-01A	TCGA-D1-A3DH-01	TCGA-D1-A3DH	01A	c009cb65-9a88-4f4a-8adc-79643044ed70	573	Alive	>=60	female	white	Stage I	Endometrioid adenocarcinoma, NOS	G3	26.9274	YES	Post (prior bilateral ovariectomy OR >12 mo since LMP with no prior hysterectomy)	0	573	573	0	573	0	573	0	Notassigned	192	NA	7.77949
TCGA-EO-A3AZ-01A-12R-A19W-07	TCGA-EO-A3AZ-01A	TCGA-EO-A3AZ-01	TCGA-EO-A3AZ	01A	53ecfda7-66bf-4040-ae72-47d5330f9b48	826	Alive	>=60	female	not reported	Stage I	Serous cystadenocarcinoma, NOS	G3	39.7959	NO	Post (prior bilateral ovariectomy OR >12 mo since LMP with no prior hysterectomy)	0	826	826	0	826	0	826	0	Notassigned	500	NA	0
TCGA-AJ-A3BH-01A-11R-A19W-07	TCGA-AJ-A3BH-01A	TCGA-AJ-A3BH-01	TCGA-AJ-A3BH	01A	b98c0e04-42ba-4053-8853-31ac9a05362b	NA	Alive	NA	female	white	Stage I	Endometrioid adenocarcinoma, NOS	G3	28.8044	NA	Post (prior bilateral ovariectomy OR >12 mo since LMP with no prior hysterectomy)	0	NA	NA	0	NA	NA	NA	0	Notassigned	268	NA	6.83198
TCGA-A5-A0GD-01A-11R-A16W-07	TCGA-A5-A0GD-01A	TCGA-A5-A0GD-01	TCGA-A5-A0GD	01A	208e125b-9e7b-48f5-b01c-05a55e7d9c27	98	Dead	>=60	female	white	Stage I	Endometrioid adenocarcinoma, NOS	G2	27.852	NO	Post (prior bilateral ovariectomy OR >12 mo since LMP with no prior hysterectomy)	1	3423	3423	0	3423	0	3423	0	Notassigned	492	NA	5.23096
TCGA-AP-A05H-01A-11R-A00V-07	TCGA-AP-A05H-01A	TCGA-AP-A05H-01	TCGA-AP-A05H	01A	c55eba70-26eb-410e-ae89-38002be84a92	1385	Alive	>=60	female	white	Stage I	Serous cystadenocarcinoma, NOS	G3	38.0196	NA	Post (prior bilateral ovariectomy OR >12 mo since LMP with no prior hysterectomy)	0	1385	1385	0	1385	0	1385	0	CN high	409	NA	6.50135
TCGA-EO-A3KX-01A-11R-A22K-07	TCGA-EO-A3KX-01A	TCGA-EO-A3KX-01	TCGA-EO-A3KX	01A	8bba1103-8b79-4013-8a93-48f4b8839d3d	1170	Alive	>=60	female	white	Stage I	Endometrioid adenocarcinoma, NOS	G3	20.9275	YES	Post (prior bilateral ovariectomy OR >12 mo since LMP with no prior hysterectomy)	0	1170	1170	0	1170	0	1170	0	Notassigned	550	NA	6.73056
TCGA-EY-A2OQ-01A-11R-A19W-07	TCGA-EY-A2OQ-01A	TCGA-EY-A2OQ-01	TCGA-EY-A2OQ	01A	75419d04-27e7-4e2f-bc88-22262707ffc0	885	Alive	>=60	female	white	Stage I	Endometrioid adenocarcinoma, NOS	G3	32.8824	NO	Post (prior bilateral ovariectomy OR >12 mo since LMP with no prior hysterectomy)	0	885	885	0	885	0	885	0	Notassigned	369	NA	7.4564
TCGA-B5-A11H-01A-11R-A118-07	TCGA-B5-A11H-01A	TCGA-B5-A11H-01	TCGA-B5-A11H	01A	8b9f9820-e202-4ccb-b038-cd8e2ce499e2	2687	Alive	>=60	female	white	Stage III	Endometrioid adenocarcinoma, NOS	G2	NA	YES	Post (prior bilateral ovariectomy OR >12 mo since LMP with no prior hysterectomy)	0	2687	2687	0	2687	0	2687	0	MSI	270	NA	6.60253
TCGA-B5-A1MZ-01A-11R-A144-07	TCGA-B5-A1MZ-01A	TCGA-B5-A1MZ-01	TCGA-B5-A1MZ	01A	b0829ff3-92ce-40ec-bde8-9de00566cd5c	1598	Alive	<60	female	white	Stage I	Endometrioid adenocarcinoma, NOS	G1	41.3703	NA	Indeterminate (neither Pre or Postmenopausal)	0	1598	613	1	613	1	1598	0	Notassigned	336	NA	6.73313
TCGA-BG-A0M0-01A-11R-A104-07	TCGA-BG-A0M0-01A	TCGA-BG-A0M0-01	TCGA-BG-A0M0	01A	6d98efb6-45ab-47bb-a206-f1af1711097a	588	Alive	>=60	female	white	Stage I	Endometrioid adenocarcinoma, NOS	G1	42.9752	NO	Post (prior bilateral ovariectomy OR >12 mo since LMP with no prior hysterectomy)	0	588	588	0	588	0	588	0	MSI	233	NA	5.8002
TCGA-BK-A0CA-01A-21R-A118-07	TCGA-BK-A0CA-01A	TCGA-BK-A0CA-01	TCGA-BK-A0CA	01A	43ae985c-ff38-4640-8fe3-10fe00c6b322	1064	Alive	>=60	female	white	Stage III	Serous cystadenocarcinoma, NOS	G3	NA	NA	Post (prior bilateral ovariectomy OR >12 mo since LMP with no prior hysterectomy)	0	1064	1064	0	1064	0	1064	0	CN low	134	NA	4.06117
TCGA-A5-A7WK-01A-11R-A34R-07	TCGA-A5-A7WK-01A	TCGA-A5-A7WK-01	TCGA-A5-A7WK	01A	7ab7ccce-678f-4e1e-afac-97a10626613a	560	Alive	>=60	female	black or african american	Stage I	Serous cystadenocarcinoma, NOS	G3	34.3679	YES	Post (prior bilateral ovariectomy OR >12 mo since LMP with no prior hysterectomy)	0	560	350	1	350	1	560	0	Notassigned	417	NA	7.62744
TCGA-D1-A15X-01A-11R-A118-07	TCGA-D1-A15X-01A	TCGA-D1-A15X-01	TCGA-D1-A15X	01A	09ee4223-5e0f-4f13-9634-4fa80b35948c	909	Alive	<60	female	white	Stage I	Serous cystadenocarcinoma, NOS	G3	25.2092	NO	Pre (<6 months since LMP AND no prior bilateral ovariectomy AND not on estrogen replacement)	0	909	909	0	909	0	909	0	CN low	326	NA	6.04246
TCGA-AJ-A8CV-01A-11R-A37O-07	TCGA-AJ-A8CV-01A	TCGA-AJ-A8CV-01	TCGA-AJ-A8CV	01A	44200349-38ca-4d9c-9298-67723293e72c	1068	Alive	<60	female	black or african american	Stage I	Endometrioid adenocarcinoma, NOS	G2	35.3386	NO	Post (prior bilateral ovariectomy OR >12 mo since LMP with no prior hysterectomy)	0	1068	1068	0	1068	0	1068	0	Notassigned	127	NA	5.05458
TCGA-B5-A0K4-01A-11R-A040-07	TCGA-B5-A0K4-01A	TCGA-B5-A0K4-01	TCGA-B5-A0K4	01A	11e50f83-6857-4dc8-8fd3-2f4c9a165b1a	1757	Alive	<60	female	not reported	Stage I	Endometrioid adenocarcinoma, NOS	G2	28.578	NA	Post (prior bilateral ovariectomy OR >12 mo since LMP with no prior hysterectomy)	0	1757	1757	0	1757	0	1757	0	CN low	586	NA	6.54352
TCGA-D1-A1O5-01A-11R-A14D-07	TCGA-D1-A1O5-01A	TCGA-D1-A1O5-01	TCGA-D1-A1O5	01A	a775c855-db88-42ef-9c02-d5f6459f8bd8	458	Alive	>=60	female	white	Stage I	Endometrioid adenocarcinoma, NOS	G1	30.863	NO	Post (prior bilateral ovariectomy OR >12 mo since LMP with no prior hysterectomy)	0	458	458	0	458	0	458	0	Notassigned	636	NA	4.16141
TCGA-AX-A1CE-01A-11R-A137-07	TCGA-AX-A1CE-01A	TCGA-AX-A1CE-01	TCGA-AX-A1CE	01A	6ac09968-001a-4ee8-9aae-c3e7a46c728f	1037	Alive	>=60	female	white	Stage I	Endometrioid adenocarcinoma, NOS	G3	22.6562	NA	Post (prior bilateral ovariectomy OR >12 mo since LMP with no prior hysterectomy)	0	1037	1037	0	NA	NA	1037	0	Notassigned	202	NA	5.23101
TCGA-BG-A0MG-01A-21R-A104-07	TCGA-BG-A0MG-01A	TCGA-BG-A0MG-01	TCGA-BG-A0MG	01A	eeb197bf-8e25-47e9-afaf-e42dc3f5541a	1477	Alive	>=60	female	white	Stage I	Endometrioid adenocarcinoma, NOS	G1	23.8281	NO	Post (prior bilateral ovariectomy OR >12 mo since LMP with no prior hysterectomy)	0	1477	1477	0	1477	0	1477	0	CN low	226	NA	6.2218
TCGA-D1-A17Q-01A-11R-A12I-07	TCGA-D1-A17Q-01A	TCGA-D1-A17Q-01	TCGA-D1-A17Q	01A	fd7f8b01-5209-47a2-b7ea-054929f851e8	54	Alive	<60	female	white	Stage I	Endometrioid adenocarcinoma, NOS	G2	23.8087	NO	Peri (6-12 months since last menstrual period)	0	54	54	0	54	0	54	0	POLE	406	NA	5.61818
TCGA-EO-A3KW-01A-11R-A22K-07	TCGA-EO-A3KW-01A	TCGA-EO-A3KW-01	TCGA-EO-A3KW	01A	d7a5b190-77d1-4766-9f0e-0e9f0c083717	497	Alive	>=60	female	not reported	Stage I	Serous cystadenocarcinoma, NOS	G3	26.4855	NO	Post (prior bilateral ovariectomy OR >12 mo since LMP with no prior hysterectomy)	0	497	497	0	497	0	497	0	Notassigned	258	NA	6.67637
TCGA-BG-A0MT-01A-11R-A104-07	TCGA-BG-A0MT-01A	TCGA-BG-A0MT-01	TCGA-BG-A0MT	01A	2b0f7ab4-6b00-4803-9547-3ff162048cdd	644	Alive	>=60	female	white	Stage I	Endometrioid adenocarcinoma, NOS	G2	25.8645	NO	Post (prior bilateral ovariectomy OR >12 mo since LMP with no prior hysterectomy)	0	644	565	1	NA	NA	644	0	CN low	625	NA	5.82814
TCGA-QS-A5YR-01A-31R-A31O-07	TCGA-QS-A5YR-01A	TCGA-QS-A5YR-01	TCGA-QS-A5YR	01A	cb46c9fe-19d7-4915-a3d1-1f4c067193f7	719	Alive	>=60	female	black or african american	Stage III	Endometrioid adenocarcinoma, NOS	G2	35.4308	YES	Post (prior bilateral ovariectomy OR >12 mo since LMP with no prior hysterectomy)	0	719	719	0	NA	NA	719	0	Notassigned	464	NA	4.05266
TCGA-BG-A0MU-01A-11R-A104-07	TCGA-BG-A0MU-01A	TCGA-BG-A0MU-01	TCGA-BG-A0MU	01A	198aea6e-88e9-4bf5-a08f-f32b01e017e7	617	Alive	>=60	female	white	Stage III	Endometrioid adenocarcinoma, NOS	G1	29.4321	NO	Post (prior bilateral ovariectomy OR >12 mo since LMP with no prior hysterectomy)	0	617	617	0	617	0	617	0	CN low	312	NA	6.78161
TCGA-D1-A0ZZ-01A-11R-A10J-07	TCGA-D1-A0ZZ-01A	TCGA-D1-A0ZZ-01	TCGA-D1-A0ZZ	01A	e35fb22b-b902-4d1f-97f6-840d3f499947	686	Alive	>=60	female	white	Stage I	Serous cystadenocarcinoma, NOS	G3	21.5045	NO	Post (prior bilateral ovariectomy OR >12 mo since LMP with no prior hysterectomy)	0	686	686	0	686	0	686	0	CN high	591	NA	7.39244
TCGA-B5-A3FB-01A-11R-A19W-07	TCGA-B5-A3FB-01A	TCGA-B5-A3FB-01	TCGA-B5-A3FB	01A	08bf36be-d2a7-4cf8-b514-96cafe0a30a1	2844	Alive	>=60	female	black or african american	Stage I	Endometrioid adenocarcinoma, NOS	G3	39.7924	YES	Post (prior bilateral ovariectomy OR >12 mo since LMP with no prior hysterectomy)	0	2844	2844	0	NA	NA	2844	0	Notassigned	110	NA	6.06867
TCGA-EY-A1GP-01A-11R-A13S-07	TCGA-EY-A1GP-01A	TCGA-EY-A1GP-01	TCGA-EY-A1GP	01A	cb871791-fc35-4adf-90e6-0bb363558df1	573	Alive	<60	female	black or african american	Stage I	Endometrioid adenocarcinoma, NOS	G1	28.8415	YES	Post (prior bilateral ovariectomy OR >12 mo since LMP with no prior hysterectomy)	0	573	573	0	573	0	573	0	Notassigned	491	NA	5.58903
TCGA-AJ-A3BI-01A-11R-A213-07	TCGA-AJ-A3BI-01A	TCGA-AJ-A3BI-01	TCGA-AJ-A3BI	01A	233e6b31-248c-4487-85a7-c04c77fb0bb1	575	Alive	>=60	female	white	Stage I	Endometrioid adenocarcinoma, NOS	G3	40.5696	YES	Post (prior bilateral ovariectomy OR >12 mo since LMP with no prior hysterectomy)	0	575	373	1	NA	NA	575	0	Notassigned	99	NA	1.71346
TCGA-AX-A2HH-01A-11R-A32Y-07	TCGA-AX-A2HH-01A	TCGA-AX-A2HH-01	TCGA-AX-A2HH	01A	6bf245e5-f2c6-48af-8490-9e18981c1c28	540	Alive	>=60	female	white	Stage I	Endometrioid adenocarcinoma, NOS	G3	27.0552	NA	NA	0	540	540	0	NA	NA	540	0	Notassigned	475	NA	6.42419
TCGA-BG-A0W1-01A-12R-A109-07	TCGA-BG-A0W1-01A	TCGA-BG-A0W1-01	TCGA-BG-A0W1	01A	a3c64be0-748b-4709-8591-44b82b0db328	122	Alive	>=60	female	white	Stage II	Endometrioid adenocarcinoma, NOS	G2	33.1361	NO	Post (prior bilateral ovariectomy OR >12 mo since LMP with no prior hysterectomy)	0	1607	1607	0	1607	0	1607	0	CN low	361	NA	6.23061
TCGA-BK-A4ZD-01A-11R-A27V-07	TCGA-BK-A4ZD-01A	TCGA-BK-A4ZD-01	TCGA-BK-A4ZD	01A	0b5db044-cc84-4ed9-a5b9-b382927e2b54	506	Alive	<60	female	black or african american	Stage I	Endometrioid adenocarcinoma, NOS	G3	53.4457	YES	Pre (<6 months since LMP AND no prior bilateral ovariectomy AND not on estrogen replacement)	0	506	506	0	506	0	506	0	Notassigned	69	NA	7.73621
TCGA-BG-A2L7-01A-11R-A18M-07	TCGA-BG-A2L7-01A	TCGA-BG-A2L7-01	TCGA-BG-A2L7	01A	a6cd4b64-d26c-47ae-8e30-f07be795ba2e	612	Alive	>=60	female	white	Stage I	Endometrioid adenocarcinoma, NOS	G3	NA	NA	NA	0	612	612	0	612	0	612	0	Notassigned	392	NA	5.06804
TCGA-B5-A5OC-01A-21R-A27V-07	TCGA-B5-A5OC-01A	TCGA-B5-A5OC-01	TCGA-B5-A5OC	01A	2fc30776-1bf8-4481-9145-4e3dc5556aca	1249	Alive	>=60	female	black or african american	Stage III	Endometrioid adenocarcinoma, NOS	G3	NA	YES	NA	0	1249	1249	0	NA	NA	1249	0	Notassigned	456	NA	6.7959
TCGA-BG-A187-01A-11R-A12I-07	TCGA-BG-A187-01A	TCGA-BG-A187-01	TCGA-BG-A187	01A	f6c23150-8009-4de9-919d-8814973af20b	448	Alive	>=60	female	white	Stage I	Endometrioid adenocarcinoma, NOS	G2	23.8281	NO	NA	0	448	448	0	448	0	448	0	CN low	282	NA	5.49065
TCGA-AW-A1PO-01A-12R-A157-07	TCGA-AW-A1PO-01A	TCGA-AW-A1PO-01	TCGA-AW-A1PO	01A	14862167-5eae-4c97-9537-b5435e63a7d1	17	Alive	>=60	female	white	Stage III	Endometrioid adenocarcinoma, NOS	G3	22.1003	NA	Post (prior bilateral ovariectomy OR >12 mo since LMP with no prior hysterectomy)	0	17	17	0	NA	NA	17	0	Notassigned	73	NA	7.57464
TCGA-AP-A05J-01A-11R-A00V-07	TCGA-AP-A05J-01A	TCGA-AP-A05J-01	TCGA-AP-A05J	01A	c0db087e-6f6b-40ff-be59-d3ad636f5337	1122	Alive	>=60	female	white	Stage II	Serous cystadenocarcinoma, NOS	G3	27.9904	NA	Post (prior bilateral ovariectomy OR >12 mo since LMP with no prior hysterectomy)	0	1122	1122	0	1122	0	1122	0	CN high	250	NA	6.89558
TCGA-AP-A1DK-01A-11R-A137-07	TCGA-AP-A1DK-01A	TCGA-AP-A1DK-01	TCGA-AP-A1DK	01A	a9e9a28c-f7b9-4e72-9abd-d9aaf61ea1e8	2767	Alive	<60	female	white	Stage I	Endometrioid adenocarcinoma, NOS	G3	21.875	NA	Post (prior bilateral ovariectomy OR >12 mo since LMP with no prior hysterectomy)	0	2767	2767	0	2767	0	2767	0	Notassigned	593	NA	5.95552
TCGA-AP-A0LP-01A-12R-A104-07	TCGA-AP-A0LP-01A	TCGA-AP-A0LP-01	TCGA-AP-A0LP	01A	39bf9f0a-4e12-4a81-aa3f-22ce63f8d27a	1875	Alive	>=60	female	white	Stage I	Endometrioid adenocarcinoma, NOS	G1	21.5139	NO	Post (prior bilateral ovariectomy OR >12 mo since LMP with no prior hysterectomy)	0	1875	1875	0	1875	0	1875	0	MSI	190	NA	4.86054
TCGA-AX-A3FX-01A-11R-A22K-07	TCGA-AX-A3FX-01A	TCGA-AX-A3FX-01	TCGA-AX-A3FX	01A	10d214b0-f69c-4d30-a1ea-24ee5ba64cab	4	Dead	>=60	female	white	Stage II	Endometrioid adenocarcinoma, NOS	G3	38.2866	NA	Post (prior bilateral ovariectomy OR >12 mo since LMP with no prior hysterectomy)	1	1333	938	1	NA	NA	1333	NA	Notassigned	366	NA	6.54931
TCGA-AP-A1E1-01A-11R-A137-07	TCGA-AP-A1E1-01A	TCGA-AP-A1E1-01	TCGA-AP-A1E1	01A	f0339554-e555-43cd-be40-a1fc6d5c53ce	1395	Alive	>=60	female	white	Stage I	Endometrioid adenocarcinoma, NOS	G2	28.5156	NA	Post (prior bilateral ovariectomy OR >12 mo since LMP with no prior hysterectomy)	0	1395	1395	0	1395	0	1395	0	Notassigned	283	NA	5.56535
TCGA-PG-A915-01A-11R-A37O-07	TCGA-PG-A915-01A	TCGA-PG-A915-01	TCGA-PG-A915	01A	99d87ee6-32a4-434a-b0d7-e69d0c74c142	249	Alive	>=60	female	black or african american	Stage I	Serous cystadenocarcinoma, NOS	G3	NA	NO	Post (prior bilateral ovariectomy OR >12 mo since LMP with no prior hysterectomy)	0	249	249	0	249	0	249	0	Notassigned	548	NA	7.5726
TCGA-EY-A2OO-01A-11R-A19W-07	TCGA-EY-A2OO-01A	TCGA-EY-A2OO-01	TCGA-EY-A2OO	01A	3ccd1b19-cc16-4ad2-9dab-8b900cf6a5a1	1392	Alive	<60	female	white	Stage I	Serous cystadenocarcinoma, NOS	G3	25.7959	NO	Post (prior bilateral ovariectomy OR >12 mo since LMP with no prior hysterectomy)	0	1392	1392	0	1392	0	1392	0	Notassigned	149	NA	6.8067
TCGA-BK-A13B-01A-51R-A22K-07	TCGA-BK-A13B-01A	TCGA-BK-A13B-01	TCGA-BK-A13B	01A	d1305843-a9f4-44ca-883e-46e3d518ad24	966	Alive	<60	female	black or african american	Stage I	Endometrioid adenocarcinoma, NOS	G3	45.3287	YES	Post (prior bilateral ovariectomy OR >12 mo since LMP with no prior hysterectomy)	0	966	760	1	760	1	966	0	Notassigned	204	NA	6.4244
TCGA-B5-A1MU-01A-11R-A13S-07	TCGA-B5-A1MU-01A	TCGA-B5-A1MU-01	TCGA-B5-A1MU	01A	5651e947-75df-4f0e-a2fb-1722d5751fc9	NA	Dead	>=60	female	white	Stage IV	Serous cystadenocarcinoma, NOS	G3	20.3619	NO	Post (prior bilateral ovariectomy OR >12 mo since LMP with no prior hysterectomy)	1	1548	1365	1	NA	NA	1548	1	CN high	388	NA	5.06462
TCGA-BK-A0CC-01A-21R-A16W-07	TCGA-BK-A0CC-01A	TCGA-BK-A0CC-01	TCGA-BK-A0CC	01A	8fd3b86a-031a-44bf-840c-2b631d9e704c	1067	Alive	>=60	female	black or african american	Stage III	Serous cystadenocarcinoma, NOS	G3	31.1634	YES	Post (prior bilateral ovariectomy OR >12 mo since LMP with no prior hysterectomy)	0	1067	1010	1	1010	1	1067	0	CN high	281	NA	6.38769
TCGA-AJ-A3OL-01A-11R-A22K-07	TCGA-AJ-A3OL-01A	TCGA-AJ-A3OL-01	TCGA-AJ-A3OL	01A	676ebe30-6ee9-46ef-a6ba-fe916fd4893c	57	Dead	<60	female	white	Stage III	Endometrioid adenocarcinoma, NOS	G3	25	NO	Post (prior bilateral ovariectomy OR >12 mo since LMP with no prior hysterectomy)	1	449	424	1	424	1	449	1	Notassigned	607	NA	6.3623
TCGA-AX-A1CJ-01A-11R-A137-07	TCGA-AX-A1CJ-01A	TCGA-AX-A1CJ-01	TCGA-AX-A1CJ	01A	65c5640b-629d-49be-bfa5-8338578ec8c5	2233	Alive	<60	female	black or african american	Stage I	Endometrioid adenocarcinoma, NOS	G2	43.2835	NA	Indeterminate (neither Pre or Postmenopausal)	0	2233	2233	0	NA	NA	2233	0	Notassigned	208	NA	5.47295
TCGA-BG-A2AE-01A-11R-A16F-07	TCGA-BG-A2AE-01A	TCGA-BG-A2AE-01	TCGA-BG-A2AE	01A	869c06bb-c3f3-454e-b43d-3bea53585540	721	Alive	<60	female	white	Stage I	Serous cystadenocarcinoma, NOS	G3	42.1335	NA	Peri (6-12 months since last menstrual period)	0	721	721	0	721	0	721	0	CN low	397	NA	6.20288
TCGA-D1-A103-01A-11R-A10J-07	TCGA-D1-A103-01A	TCGA-D1-A103-01	TCGA-D1-A103	01A	415b79c0-10e4-403a-9d45-dba9a7b7dae6	669	Alive	>=60	female	white	Stage I	Endometrioid adenocarcinoma, NOS	G1	26.6667	NO	Post (prior bilateral ovariectomy OR >12 mo since LMP with no prior hysterectomy)	0	669	669	0	669	0	669	0	POLE	430	NA	6.11657
TCGA-AX-A2HD-01A-21R-A17B-07	TCGA-AX-A2HD-01A	TCGA-AX-A2HD-01	TCGA-AX-A2HD	01A	169e2872-37bb-4091-bc4f-e23b506f6f4f	1414	Alive	>=60	female	white	Stage III	Endometrioid adenocarcinoma, NOS	G3	22.9719	NA	NA	0	1414	1414	0	NA	NA	1414	0	Notassigned	618	NA	6.59109
TCGA-BS-A0UF-01A-11R-A104-07	TCGA-BS-A0UF-01A	TCGA-BS-A0UF-01	TCGA-BS-A0UF	01A	0494b587-7b21-428b-be16-111bb3bf8631	2611	Alive	>=60	female	asian	Stage I	Endometrioid adenocarcinoma, NOS	G3	26.3779	NO	Post (prior bilateral ovariectomy OR >12 mo since LMP with no prior hysterectomy)	0	2611	2611	0	2611	0	2611	0	POLE	113	NA	6.10335
TCGA-AP-A054-01A-11R-A16W-07	TCGA-AP-A054-01A	TCGA-AP-A054-01	TCGA-AP-A054	01A	741e51fd-4360-4e80-9a34-50a22df1f43d	NA	Dead	>=60	female	white	Stage III	Endometrioid adenocarcinoma, NOS	G3	26.8923	NO	Post (prior bilateral ovariectomy OR >12 mo since LMP with no prior hysterectomy)	1	709	566	1	566	1	709	1	MSI	259	NA	3.97858
TCGA-BK-A6W3-01A-12R-A34R-07	TCGA-BK-A6W3-01A	TCGA-BK-A6W3-01	TCGA-BK-A6W3	01A	404902c7-47fd-4860-b7e2-e682d8a1880a	305	Alive	<60	female	black or african american	Stage II	Endometrioid adenocarcinoma, NOS	G2	31.9122	NO	Pre (<6 months since LMP AND no prior bilateral ovariectomy AND not on estrogen replacement)	0	305	305	0	305	0	305	0	Notassigned	403	NA	6.47615
TCGA-A5-A0GH-01A-21R-A16W-07	TCGA-A5-A0GH-01A	TCGA-A5-A0GH-01	TCGA-A5-A0GH	01A	7986dafe-0e82-47f4-8da3-1dc1575a0ac0	2254	Alive	<60	female	white	Stage I	Endometrioid adenocarcinoma, NOS	G3	20.7008	NO	Post (prior bilateral ovariectomy OR >12 mo since LMP with no prior hysterectomy)	0	2254	2254	0	2254	0	2254	0	MSI	126	NA	5.7877
TCGA-AJ-A3BK-01A-11R-A19W-07	TCGA-AJ-A3BK-01A	TCGA-AJ-A3BK-01	TCGA-AJ-A3BK	01A	3a39e135-430b-4858-aa0a-54d3a68db335	1031	Alive	>=60	female	white	Stage I	Endometrioid adenocarcinoma, NOS	G3	34.6268	NO	Post (prior bilateral ovariectomy OR >12 mo since LMP with no prior hysterectomy)	0	1031	1031	0	1031	0	1031	0	Notassigned	290	NA	4.72589
TCGA-SJ-A6ZI-01A-12R-A34R-07	TCGA-SJ-A6ZI-01A	TCGA-SJ-A6ZI-01	TCGA-SJ-A6ZI	01A	abdbb7e1-f768-48ad-b3fb-a357f746d8fc	631	Alive	>=60	female	black or african american	Stage I	Endometrioid adenocarcinoma, NOS	G1	213.499	NO	NA	0	631	631	0	631	0	631	0	Notassigned	160	NA	6.62787
TCGA-AJ-A2QN-01A-11R-A18M-07	TCGA-AJ-A2QN-01A	TCGA-AJ-A2QN-01	TCGA-AJ-A2QN	01A	13ef9249-7f76-4e49-a122-07df68c278b7	1069	Alive	>=60	female	white	Stage II	Endometrioid adenocarcinoma, NOS	G3	45.6747	YES	Post (prior bilateral ovariectomy OR >12 mo since LMP with no prior hysterectomy)	0	1069	1069	0	1069	0	1069	0	Notassigned	521	NA	6.16859
TCGA-FI-A2D4-01A-12R-A17B-07	TCGA-FI-A2D4-01A	TCGA-FI-A2D4-01	TCGA-FI-A2D4	01A	60da62bd-de6d-4b19-b56f-e5cea1146588	NA	Dead	<60	female	white	Stage III	Endometrioid adenocarcinoma, NOS	G3	42.1544	NO	Pre (<6 months since LMP AND no prior bilateral ovariectomy AND not on estrogen replacement)	1	243	243	1	NA	NA	243	1	Notassigned	187	NA	6.19661
TCGA-AJ-A3EJ-01A-11R-A19W-07	TCGA-AJ-A3EJ-01A	TCGA-AJ-A3EJ-01	TCGA-AJ-A3EJ	01A	91338366-f042-4ae8-8b8e-06de5bbc98b6	NA	Dead	>=60	female	white	Stage III	Serous cystadenocarcinoma, NOS	G3	25.8645	NO	Post (prior bilateral ovariectomy OR >12 mo since LMP with no prior hysterectomy)	1	50	50	1	NA	NA	50	1	Notassigned	468	NA	6.8756
TCGA-B5-A1MX-01A-11R-A144-07	TCGA-B5-A1MX-01A	TCGA-B5-A1MX-01	TCGA-B5-A1MX	01A	476a249d-6cc1-469a-8638-1d44a2822a7b	1473	Alive	<60	female	white	Stage I	Endometrioid adenocarcinoma, NOS	G3	25.1039	NA	Pre (<6 months since LMP AND no prior bilateral ovariectomy AND not on estrogen replacement)	0	1473	1473	0	1473	0	1473	0	Notassigned	235	NA	6.70249
TCGA-B5-A11N-01A-11R-A118-07	TCGA-B5-A11N-01A	TCGA-B5-A11N-01	TCGA-B5-A11N	01A	0fca7b43-2810-4fcf-bd1c-f9f9da366038	1876	Alive	>=60	female	white	Stage I	Endometrioid adenocarcinoma, NOS	G1	29.7265	NA	Post (prior bilateral ovariectomy OR >12 mo since LMP with no prior hysterectomy)	0	1876	1876	0	1876	0	1876	0	POLE	146	NA	7.18426
TCGA-EO-A1Y5-01A-11R-A157-07	TCGA-EO-A1Y5-01A	TCGA-EO-A1Y5-01	TCGA-EO-A1Y5	01A	4c9805fe-06f6-44e9-bec8-2c62a813b2cb	332	Alive	>=60	female	not reported	Stage III	Serous cystadenocarcinoma, NOS	G3	30.4772	NO	Post (prior bilateral ovariectomy OR >12 mo since LMP with no prior hysterectomy)	0	332	332	0	332	0	332	0	CN high	411	NA	5.22606
TCGA-EY-A72D-01A-12R-A34R-07	TCGA-EY-A72D-01A	TCGA-EY-A72D-01	TCGA-EY-A72D	01A	6fcf4f4a-cb4c-4908-9134-f53a61d9642c	179	Alive	>=60	female	black or african american	Stage II	Endometrioid adenocarcinoma, NOS	G3	40.3902	NA	Post (prior bilateral ovariectomy OR >12 mo since LMP with no prior hysterectomy)	0	179	179	0	179	0	179	0	Notassigned	362	NA	7.58637
TCGA-B5-A0JT-01A-21R-A118-07	TCGA-B5-A0JT-01A	TCGA-B5-A0JT-01	TCGA-B5-A0JT	01A	f5f63b6b-a693-460f-a25c-69e3b0944a8e	1682	Alive	>=60	female	white	Stage III	Endometrioid adenocarcinoma, NOS	G1	42.1627	YES	Post (prior bilateral ovariectomy OR >12 mo since LMP with no prior hysterectomy)	0	1682	1682	0	1682	0	1682	0	CN low	549	NA	6.31214
TCGA-BS-A0U5-01A-11R-A109-07	TCGA-BS-A0U5-01A	TCGA-BS-A0U5-01	TCGA-BS-A0U5	01A	7c04785f-09ad-4e68-8e6c-3b60c1efabd7	2935	Alive	>=60	female	white	Stage I	Endometrioid adenocarcinoma, NOS	G1	21.6713	NO	Post (prior bilateral ovariectomy OR >12 mo since LMP with no prior hysterectomy)	0	2935	2935	0	2935	0	2935	0	CN low	277	NA	5.57433
TCGA-BK-A26L-01A-11R-A16F-07	TCGA-BK-A26L-01A	TCGA-BK-A26L-01	TCGA-BK-A26L	01A	e0ad3f97-ddf5-40d6-abbd-2e0770b755bc	734	Alive	>=60	female	white	Stage III	Serous cystadenocarcinoma, NOS	G3	32.4619	NO	Post (prior bilateral ovariectomy OR >12 mo since LMP with no prior hysterectomy)	0	734	734	0	734	0	734	0	Notassigned	446	NA	6.39353
TCGA-DF-A2KU-01A-11R-A180-07	TCGA-DF-A2KU-01A	TCGA-DF-A2KU-01	TCGA-DF-A2KU	01A	08dcd1d8-a3b5-48c4-ab8f-a5016daf63d3	3067	Alive	NA	female	not reported	Stage I	Endometrioid adenocarcinoma, NOS	G3	NA	NO	Post (prior bilateral ovariectomy OR >12 mo since LMP with no prior hysterectomy)	0	3067	3067	0	3067	0	3067	0	Notassigned	174	NA	2.16102
TCGA-A5-A0GM-01A-11R-A040-07	TCGA-A5-A0GM-01A	TCGA-A5-A0GM-01	TCGA-A5-A0GM	01A	aa74d8a8-4089-477b-bf4e-25bb23cda909	1841	Alive	<60	female	white	Stage I	Endometrioid adenocarcinoma, NOS	G1	37.8906	NO	Post (prior bilateral ovariectomy OR >12 mo since LMP with no prior hysterectomy)	0	1841	1841	0	1841	0	1841	0	CN low	482	NA	6.33581
TCGA-AJ-A3EM-01A-11R-A213-07	TCGA-AJ-A3EM-01A	TCGA-AJ-A3EM-01	TCGA-AJ-A3EM	01A	50c073dd-0937-4cb9-b7b4-f08926bbbcc5	677	Alive	>=60	female	white	Stage I	Endometrioid adenocarcinoma, NOS	G3	30.1194	NO	Post (prior bilateral ovariectomy OR >12 mo since LMP with no prior hysterectomy)	0	677	677	0	677	0	677	0	Notassigned	314	NA	6.91247
TCGA-EO-A3AY-01A-12R-A19W-07	TCGA-EO-A3AY-01A	TCGA-EO-A3AY-01	TCGA-EO-A3AY	01A	c7351fb2-1872-44b7-9189-412fb0b5cf6a	1158	Alive	<60	female	not reported	Stage I	Endometrioid adenocarcinoma, NOS	G3	28.257	NO	Post (prior bilateral ovariectomy OR >12 mo since LMP with no prior hysterectomy)	0	1158	1163	1	1163	1	1158	0	Notassigned	405	NA	3.3876
TCGA-BS-A0T9-01A-11R-A12I-07	TCGA-BS-A0T9-01A	TCGA-BS-A0T9-01	TCGA-BS-A0T9	01A	730603d9-7613-469b-990b-1b79ab133290	NA	Dead	<60	female	native hawaiian or other pacific islander	Stage IV	Endometrioid adenocarcinoma, NOS	G3	40.0367	NO	Pre (<6 months since LMP AND no prior bilateral ovariectomy AND not on estrogen replacement)	1	1428	634	1	NA	NA	1428	1	CN low	494	NA	6.19071
TCGA-AP-A05A-01A-11R-A00V-07	TCGA-AP-A05A-01A	TCGA-AP-A05A-01	TCGA-AP-A05A	01A	bdb1b32b-f903-4ff5-adc5-1adbd42f0018	1199	Dead	>=60	female	white	Stage II	Serous cystadenocarcinoma, NOS	G3	NA	NA	Post (prior bilateral ovariectomy OR >12 mo since LMP with no prior hysterectomy)	1	1944	1944	0	1944	0	1944	0	CN high	162	NA	7.26088
TCGA-B5-A11G-01A-13R-A118-07	TCGA-B5-A11G-01A	TCGA-B5-A11G-01	TCGA-B5-A11G	01A	c49be39e-dc30-440f-88c1-1aa5b05bc505	3448	Alive	>=60	female	black or african american	Stage I	Endometrioid adenocarcinoma, NOS	G1	30.0781	NO	Post (prior bilateral ovariectomy OR >12 mo since LMP with no prior hysterectomy)	0	3448	3448	0	3448	0	3448	0	MSI	396	NA	4.85529
TCGA-AP-A05O-01A-12R-A118-07	TCGA-AP-A05O-01A	TCGA-AP-A05O-01	TCGA-AP-A05O	01A	3938ed9b-38d0-4c88-aaab-ac977798438f	384	Alive	>=60	female	white	Stage I	Endometrioid adenocarcinoma, NOS	G3	41.2594	NA	Post (prior bilateral ovariectomy OR >12 mo since LMP with no prior hysterectomy)	0	384	340	1	340	1	384	0	Notassigned	305	NA	5.34409
TCGA-BG-A0VW-01A-11R-A118-07	TCGA-BG-A0VW-01A	TCGA-BG-A0VW-01	TCGA-BG-A0VW	01A	94d4253a-b7ba-4138-b893-cdc493a6a5ee	1582	Alive	>=60	female	white	Stage I	Endometrioid adenocarcinoma, NOS	G1	37.7297	NO	Post (prior bilateral ovariectomy OR >12 mo since LMP with no prior hysterectomy)	0	1582	1582	0	1582	0	1582	0	MSI	90	NA	6.40931
TCGA-KP-A3W3-01A-11R-A22K-07	TCGA-KP-A3W3-01A	TCGA-KP-A3W3-01	TCGA-KP-A3W3	01A	b4cc5c0d-e888-467e-8b15-5be5fdeebdc9	794	Alive	>=60	female	white	Stage I	Serous cystadenocarcinoma, NOS	G3	46.8471	NA	Post (prior bilateral ovariectomy OR >12 mo since LMP with no prior hysterectomy)	0	794	661	1	661	1	794	0	Notassigned	499	NA	5.65257
TCGA-BG-A0MC-01A-21R-A040-07	TCGA-BG-A0MC-01A	TCGA-BG-A0MC-01	TCGA-BG-A0MC	01A	3d4c462c-32a0-4858-bfef-e48b7091555e	1263	Alive	>=60	female	white	Stage I	Endometrioid adenocarcinoma, NOS	G1	56.1915	YES	Post (prior bilateral ovariectomy OR >12 mo since LMP with no prior hysterectomy)	0	1263	1263	0	1263	0	1263	0	CN low	298	NA	5.56475
TCGA-A5-A0R6-01A-11R-A104-07	TCGA-A5-A0R6-01A	TCGA-A5-A0R6-01	TCGA-A5-A0R6	01A	314564ea-f23e-4097-9932-b02792584857	1153	Alive	>=60	female	white	Stage III	Serous cystadenocarcinoma, NOS	G3	27.5873	NO	Post (prior bilateral ovariectomy OR >12 mo since LMP with no prior hysterectomy)	0	1153	961	1	1153	0	1153	0	CN high	71	NA	6.28273
TCGA-B5-A3F9-01A-21R-A22K-07	TCGA-B5-A3F9-01A	TCGA-B5-A3F9-01	TCGA-B5-A3F9	01A	61aa0f4b-7a2f-4261-beee-2a86e607ca98	4155	Alive	<60	female	black or african american	Stage I	Endometrioid adenocarcinoma, NOS	G3	56.2491	YES	Post (prior bilateral ovariectomy OR >12 mo since LMP with no prior hysterectomy)	0	4155	4155	0	NA	NA	4155	0	Notassigned	181	NA	5.38312
TCGA-AJ-A23N-01A-11R-A22K-07	TCGA-AJ-A23N-01A	TCGA-AJ-A23N-01	TCGA-AJ-A23N	01A	0c529207-dece-48c3-9968-d9244749ad82	33	Dead	>=60	female	white	Stage III	Serous cystadenocarcinoma, NOS	G3	NA	NO	Post (prior bilateral ovariectomy OR >12 mo since LMP with no prior hysterectomy)	1	439	439	1	NA	NA	439	1	Notassigned	276	NA	6.65975
TCGA-BG-A0M8-01A-12R-A104-07	TCGA-BG-A0M8-01A	TCGA-BG-A0M8-01	TCGA-BG-A0M8	01A	f6ab9c8d-9cd1-4803-b44a-402165a64523	2020	Alive	<60	female	white	Stage I	Endometrioid adenocarcinoma, NOS	G3	81.6406	NA	Indeterminate (neither Pre or Postmenopausal)	0	2020	2020	0	2020	0	2020	0	CN high	227	NA	6.63421
TCGA-A5-A0GA-01A-11R-A040-07	TCGA-A5-A0GA-01A	TCGA-A5-A0GA-01	TCGA-A5-A0GA	01A	871d7770-b9e8-455d-9c7a-77e8b5eb9f95	NA	Dead	>=60	female	white	Stage III	Endometrioid adenocarcinoma, NOS	G3	31.1419	NO	Post (prior bilateral ovariectomy OR >12 mo since LMP with no prior hysterectomy)	1	543	543	1	NA	NA	543	1	MSI	211	NA	6.63644
TCGA-A5-A0R7-01A-31R-A16W-07	TCGA-A5-A0R7-01A	TCGA-A5-A0R7-01	TCGA-A5-A0R7	01A	f43c0be3-6cd7-4b0c-aa2f-5d79bbd5631c	535	Alive	<60	female	white	Stage I	Endometrioid adenocarcinoma, NOS	G2	49.9541	NO	Post (prior bilateral ovariectomy OR >12 mo since LMP with no prior hysterectomy)	0	535	535	0	535	0	535	0	CN high	621	NA	6.25486
TCGA-FI-A2D2-01A-11R-A17B-07	TCGA-FI-A2D2-01A	TCGA-FI-A2D2-01	TCGA-FI-A2D2	01A	0c36b561-2b38-4c91-81fe-b19248c44422	1215	Dead	>=60	female	white	Stage I	Serous cystadenocarcinoma, NOS	G3	58.8152	NA	Post (prior bilateral ovariectomy OR >12 mo since LMP with no prior hysterectomy)	1	2352	1917	1	1917	1	2352	1	CN high	255	NA	7.12794
TCGA-B5-A3FA-01A-11R-A19W-07	TCGA-B5-A3FA-01A	TCGA-B5-A3FA-01	TCGA-B5-A3FA	01A	cb3d7da5-bd29-44c6-8308-d40fbafa83d7	2929	Alive	>=60	female	white	Stage I	Endometrioid adenocarcinoma, NOS	G3	29.6427	NA	Post (prior bilateral ovariectomy OR >12 mo since LMP with no prior hysterectomy)	0	2929	2929	0	NA	NA	2929	0	Notassigned	163	NA	6.68802
TCGA-AJ-A3OJ-01A-11R-A22K-07	TCGA-AJ-A3OJ-01A	TCGA-AJ-A3OJ-01	TCGA-AJ-A3OJ	01A	805acd45-677a-4d84-8281-0c40bf4996d0	467	Alive	<60	female	white	Stage II	Endometrioid adenocarcinoma, NOS	G3	42.1924	NO	Indeterminate (neither Pre or Postmenopausal)	0	467	467	0	467	0	467	0	Notassigned	154	NA	7.07073
TCGA-BK-A0CA-01A-21R-A277-07	TCGA-BK-A0CA-01A	TCGA-BK-A0CA-01	TCGA-BK-A0CA	01A	0ca9db0d-531f-42f6-a244-fbfe435ce7ce	1064	Alive	>=60	female	white	Stage III	Serous cystadenocarcinoma, NOS	G3	NA	NA	Post (prior bilateral ovariectomy OR >12 mo since LMP with no prior hysterectomy)	0	1064	1064	0	1064	0	1064	0	CN low	601	NA	6.88948
TCGA-EY-A1GK-01A-11R-A13S-07	TCGA-EY-A1GK-01A	TCGA-EY-A1GK-01	TCGA-EY-A1GK	01A	c51397e3-6fa4-40ed-b822-f3af8adf80a0	693	Alive	>=60	female	white	Stage I	Endometrioid adenocarcinoma, NOS	G3	41.0156	NO	Post (prior bilateral ovariectomy OR >12 mo since LMP with no prior hysterectomy)	0	693	693	0	693	0	693	0	Notassigned	108	NA	6.50469
TCGA-EY-A212-01A-11R-A14M-07	TCGA-EY-A212-01A	TCGA-EY-A212-01	TCGA-EY-A212	01A	9f972b99-91b4-4b27-b281-4aabbf2c0cf5	110	Dead	>=60	female	white	Stage III	Papillary serous cystadenocarcinoma	G3	32.0399	YES	Post (prior bilateral ovariectomy OR >12 mo since LMP with no prior hysterectomy)	1	310	310	1	NA	NA	310	1	CN high	109	NA	6.23435
TCGA-D1-A169-01A-11R-A12I-07	TCGA-D1-A169-01A	TCGA-D1-A169-01	TCGA-D1-A169	01A	bf8d55a9-9128-4a7e-baff-4826b73d861b	1135	Alive	>=60	female	white	Stage IV	Endometrioid adenocarcinoma, NOS	G2	35.2941	NO	Post (prior bilateral ovariectomy OR >12 mo since LMP with no prior hysterectomy)	0	1135	519	1	NA	NA	1135	0	CN high	376	NA	4.89418
TCGA-BG-A3PP-01A-11R-A22K-07	TCGA-BG-A3PP-01A	TCGA-BG-A3PP-01	TCGA-BG-A3PP	01A	54cba4ae-6077-4679-bd8b-d12451ecf78d	681	Alive	>=60	female	white	Stage II	Serous cystadenocarcinoma, NOS	G3	NA	NA	Post (prior bilateral ovariectomy OR >12 mo since LMP with no prior hysterectomy)	0	681	665	1	NA	NA	681	0	Notassigned	279	NA	7.6403
TCGA-A5-A1OF-01A-11R-A14D-07	TCGA-A5-A1OF-01A	TCGA-A5-A1OF-01	TCGA-A5-A1OF	01A	c000c10f-6fb0-470d-9ece-281d7106be58	973	Alive	<60	female	not reported	Stage I	Serous cystadenocarcinoma, NOS	G3	29.1363	NO	Post (prior bilateral ovariectomy OR >12 mo since LMP with no prior hysterectomy)	0	973	973	0	973	0	973	0	Notassigned	246	NA	5.91592
TCGA-BK-A0CB-01A-32R-A104-07	TCGA-BK-A0CB-01A	TCGA-BK-A0CB-01	TCGA-BK-A0CB	01A	11f1bcdf-e5f6-484c-8cdc-347dcee69169	1092	Alive	>=60	female	white	Stage III	Endometrioid adenocarcinoma, NOS	G2	46.8038	YES	Post (prior bilateral ovariectomy OR >12 mo since LMP with no prior hysterectomy)	0	1092	1092	0	1092	0	1092	0	CN low	459	NA	6.05048
TCGA-DI-A2QU-01A-11R-A18M-07	TCGA-DI-A2QU-01A	TCGA-DI-A2QU-01	TCGA-DI-A2QU	01A	cd43d38f-230f-4a29-b193-683d1b97fe71	NA	Dead	>=60	female	white	Stage IV	Serous cystadenocarcinoma, NOS	G3	36.3281	NA	Post (prior bilateral ovariectomy OR >12 mo since LMP with no prior hysterectomy)	1	946	946	1	NA	NA	946	1	Notassigned	307	NA	6.71802
TCGA-AX-A063-01A-11R-A00V-07	TCGA-AX-A063-01A	TCGA-AX-A063-01	TCGA-AX-A063	01A	392b1414-ea30-4f14-9797-8e7798dc1341	2417	Alive	>=60	female	white	Stage I	Endometrioid adenocarcinoma, NOS	G2	34.375	NA	Post (prior bilateral ovariectomy OR >12 mo since LMP with no prior hysterectomy)	0	2417	2417	0	2417	0	2417	0	MSI	84	NA	5.53423
TCGA-AX-A3GB-01A-11R-A22K-07	TCGA-AX-A3GB-01A	TCGA-AX-A3GB-01	TCGA-AX-A3GB	01A	2a675a2c-53ca-4fa1-80d8-d9d59bda26d9	440	Alive	>=60	female	white	Stage I	Endometrioid adenocarcinoma, NOS	G3	34.8502	NA	Post (prior bilateral ovariectomy OR >12 mo since LMP with no prior hysterectomy)	0	440	440	0	NA	NA	440	0	Notassigned	98	NA	6.00908
TCGA-BG-A2AD-01A-21R-A16F-07	TCGA-BG-A2AD-01A	TCGA-BG-A2AD-01	TCGA-BG-A2AD	01A	46d6837d-c3c1-4e25-acb9-717a6fe513ff	609	Alive	>=60	female	white	Stage III	Endometrioid adenocarcinoma, NOS	G3	31.25	NA	Post (prior bilateral ovariectomy OR >12 mo since LMP with no prior hysterectomy)	0	609	609	0	609	0	609	0	Notassigned	102	NA	6.94757
TCGA-H5-A2HR-01A-11R-A180-07	TCGA-H5-A2HR-01A	TCGA-H5-A2HR-01	TCGA-H5-A2HR	01A	3c7b6176-c578-4d2d-bfdd-d2a2fed509a2	53	Alive	>=60	female	black or african american	Stage I	Endometrioid adenocarcinoma, NOS	G3	NA	NO	Post (prior bilateral ovariectomy OR >12 mo since LMP with no prior hysterectomy)	0	53	53	0	NA	NA	53	0	Notassigned	124	NA	6.07954
TCGA-AP-A0LN-01A-11R-A040-07	TCGA-AP-A0LN-01A	TCGA-AP-A0LN-01	TCGA-AP-A0LN	01A	235b04f8-cfb4-49ab-93c0-e9dd4cbe4e46	2510	Alive	<60	female	black or african american	Stage I	Endometrioid adenocarcinoma, NOS	G1	43.1848	NA	Post (prior bilateral ovariectomy OR >12 mo since LMP with no prior hysterectomy)	0	2510	2510	0	2510	0	2510	0	CN low	509	NA	5.82867
TCGA-D1-A1NU-01A-11R-A14D-07	TCGA-D1-A1NU-01A	TCGA-D1-A1NU-01	TCGA-D1-A1NU	01A	2420fc74-a8a2-44ab-96d3-7cb6636b72e7	402	Alive	>=60	female	white	Stage I	Serous cystadenocarcinoma, NOS	G3	40.7877	NO	Post (prior bilateral ovariectomy OR >12 mo since LMP with no prior hysterectomy)	0	402	402	0	402	0	402	0	CN high	229	NA	7.29548
TCGA-B5-A3FC-01A-11R-A22K-07	TCGA-B5-A3FC-01A	TCGA-B5-A3FC-01	TCGA-B5-A3FC	01A	cf1a0bd8-1f5d-487a-90a3-efd038575b1d	2185	Alive	<60	female	black or african american	Stage II	Endometrioid adenocarcinoma, NOS	G3	26.6097	NA	Post (prior bilateral ovariectomy OR >12 mo since LMP with no prior hysterectomy)	0	2185	2185	0	NA	NA	2185	0	Notassigned	76	NA	6.70933
TCGA-BS-A0V4-01A-11R-A14D-07	TCGA-BS-A0V4-01A	TCGA-BS-A0V4-01	TCGA-BS-A0V4	01A	243b00db-d908-46ff-94fb-4c018b519abe	1810	Alive	<60	female	white	Stage I	Endometrioid adenocarcinoma, NOS	G1	35.2617	NO	Post (prior bilateral ovariectomy OR >12 mo since LMP with no prior hysterectomy)	0	1810	1810	0	1810	0	1810	0	Notassigned	545	NA	6.34039
TCGA-A5-A0GI-01A-11R-A040-07	TCGA-A5-A0GI-01A	TCGA-A5-A0GI-01	TCGA-A5-A0GI	01A	70df5df0-50b6-4aae-a162-cc99ae687418	2682	Alive	>=60	female	white	Stage I	Endometrioid adenocarcinoma, NOS	G2	23.3844	NO	Post (prior bilateral ovariectomy OR >12 mo since LMP with no prior hysterectomy)	0	2682	2682	0	2682	0	2682	0	MSI	236	NA	6.18427
TCGA-QS-A8F1-01A-21R-A37O-07	TCGA-QS-A8F1-01A	TCGA-QS-A8F1-01	TCGA-QS-A8F1	01A	740e8cdf-fafd-4dd6-82a0-ec387b20a37e	125	Dead	>=60	female	black or african american	Stage III	Serous cystadenocarcinoma, NOS	G3	26.5731	NO	Post (prior bilateral ovariectomy OR >12 mo since LMP with no prior hysterectomy)	1	135	135	1	NA	NA	135	1	Notassigned	179	NA	6.06287
TCGA-D1-A17D-01A-12R-A12I-07	TCGA-D1-A17D-01A	TCGA-D1-A17D-01	TCGA-D1-A17D	01A	338cc1ad-1ecb-4440-9c0c-3f4002110d50	926	Alive	<60	female	white	Stage I	Endometrioid adenocarcinoma, NOS	G3	28.3039	YES	Post (prior bilateral ovariectomy OR >12 mo since LMP with no prior hysterectomy)	0	926	926	0	926	0	926	0	MSI	415	NA	4.75937
TCGA-BK-A56F-01A-32R-A27V-07	TCGA-BK-A56F-01A	TCGA-BK-A56F-01	TCGA-BK-A56F	01A	93c623c5-5ca3-44d8-8871-955a94778cc2	401	Alive	>=60	female	black or african american	Stage I	Endometrioid adenocarcinoma, NOS	G1	31.6158	YES	Post (prior bilateral ovariectomy OR >12 mo since LMP with no prior hysterectomy)	0	401	401	0	401	0	401	0	Notassigned	643	NA	6.62101
TCGA-A5-A2K2-01A-11R-A18M-07	TCGA-A5-A2K2-01A	TCGA-A5-A2K2-01	TCGA-A5-A2K2	01A	057daf8b-fed8-45c7-a25a-27218a88cffb	3595	Alive	>=60	female	white	Stage I	Serous cystadenocarcinoma, NOS	G3	20.8117	NO	Post (prior bilateral ovariectomy OR >12 mo since LMP with no prior hysterectomy)	0	3595	3595	0	3595	0	3595	0	Notassigned	498	NA	7.18065
TCGA-AP-A1DO-01A-11R-A137-07	TCGA-AP-A1DO-01A	TCGA-AP-A1DO-01	TCGA-AP-A1DO	01A	dae2b261-53e4-4944-bef7-4a36fb77fa07	952	Alive	>=60	female	white	Stage I	Endometrioid adenocarcinoma, NOS	G2	32.8731	NO	Post (prior bilateral ovariectomy OR >12 mo since LMP with no prior hysterectomy)	0	952	952	0	952	0	952	0	Notassigned	617	NA	6.11505
TCGA-A5-A0G3-01A-11R-A040-07	TCGA-A5-A0G3-01A	TCGA-A5-A0G3-01	TCGA-A5-A0G3	01A	2d6b4ddd-ceae-4703-97f9-cce83beecef3	1428	Alive	>=60	female	black or african american	Stage III	Serous cystadenocarcinoma, NOS	G3	23.5078	NO	Post (prior bilateral ovariectomy OR >12 mo since LMP with no prior hysterectomy)	0	1428	795	1	795	1	1428	0	Notassigned	65	NA	5.98805
TCGA-B5-A3FD-01A-11R-A19W-07	TCGA-B5-A3FD-01A	TCGA-B5-A3FD-01	TCGA-B5-A3FD	01A	3108a6ba-c776-437e-8a83-8c551abd3513	1007	Dead	>=60	female	black or african american	Stage I	Endometrioid adenocarcinoma, NOS	G3	37.9839	NA	Indeterminate (neither Pre or Postmenopausal)	1	1197	562	1	NA	NA	1197	0	Notassigned	253	NA	5.85091
TCGA-BG-A0M9-01A-21R-A104-07	TCGA-BG-A0M9-01A	TCGA-BG-A0M9-01	TCGA-BG-A0M9	01A	68486f51-6fd8-44b8-a643-5283ff70c38c	2270	Alive	>=60	female	white	Stage I	Endometrioid adenocarcinoma, NOS	G2	36.3281	NA	Post (prior bilateral ovariectomy OR >12 mo since LMP with no prior hysterectomy)	0	2270	2270	0	2270	0	2270	0	CN low	136	NA	5.4786
TCGA-EO-A1Y7-01A-11R-A157-07	TCGA-EO-A1Y7-01A	TCGA-EO-A1Y7-01	TCGA-EO-A1Y7	01A	3728822d-43ab-4cda-8b0c-d4b1ff402485	1495	Alive	>=60	female	not reported	Stage I	Endometrioid adenocarcinoma, NOS	G3	34.8944	NA	Post (prior bilateral ovariectomy OR >12 mo since LMP with no prior hysterectomy)	0	1495	880	1	NA	NA	1495	0	Notassigned	66	NA	6.12907
TCGA-B5-A0K3-01A-11R-A040-07	TCGA-B5-A0K3-01A	TCGA-B5-A0K3-01	TCGA-B5-A0K3	01A	6323b2ba-dc70-408a-9533-3288d06dac00	700	Dead	>=60	female	black or african american	Stage I	Endometrioid adenocarcinoma, NOS	G3	32.7186	YES	Post (prior bilateral ovariectomy OR >12 mo since LMP with no prior hysterectomy)	1	830	256	1	NA	NA	830	1	CN high	324	NA	5.69746
TCGA-B5-A0K1-01A-11R-A16W-07	TCGA-B5-A0K1-01A	TCGA-B5-A0K1-01	TCGA-B5-A0K1	01A	eaebe02d-406c-4499-8ff4-20b98702792c	1110	Alive	>=60	female	white	Stage I	Endometrioid adenocarcinoma, NOS	G1	38.6445	YES	Post (prior bilateral ovariectomy OR >12 mo since LMP with no prior hysterectomy)	0	1110	1110	0	1110	0	1110	0	CN low	60	NA	4.92353
TCGA-AX-A1CI-01A-11R-A137-07	TCGA-AX-A1CI-01A	TCGA-AX-A1CI-01	TCGA-AX-A1CI	01A	769ad26a-1ab3-487d-8645-97b5638cfe6a	2600	Alive	>=60	female	white	Stage I	Endometrioid adenocarcinoma, NOS	G1	27.5134	NA	Post (prior bilateral ovariectomy OR >12 mo since LMP with no prior hysterectomy)	0	2600	2600	0	NA	NA	2600	0	Notassigned	239	NA	6.6163
TCGA-EY-A1GU-01A-11R-A13S-07	TCGA-EY-A1GU-01A	TCGA-EY-A1GU-01	TCGA-EY-A1GU	01A	4e950112-41c0-4ff0-9d0e-75aafaf5df2d	378	Dead	>=60	female	black or african american	Stage I	Endometrioid adenocarcinoma, NOS	G2	35.1562	NA	Post (prior bilateral ovariectomy OR >12 mo since LMP with no prior hysterectomy)	1	997	997	0	997	0	997	0	Notassigned	271	NA	6.46014
TCGA-A5-A0GB-01A-11R-A040-07	TCGA-A5-A0GB-01A	TCGA-A5-A0GB-01	TCGA-A5-A0GB	01A	9189b3b3-9331-4b1a-8abd-dc5f37af919d	997	Alive	>=60	female	white	Stage I	Endometrioid adenocarcinoma, NOS	G3	44.8118	NO	Post (prior bilateral ovariectomy OR >12 mo since LMP with no prior hysterectomy)	0	997	997	0	997	0	997	0	MSI	85	NA	7.0821
TCGA-AP-A1E4-01A-12R-A137-07	TCGA-AP-A1E4-01A	TCGA-AP-A1E4-01	TCGA-AP-A1E4	01A	a117e882-116e-4468-9371-aaf83a708a74	1555	Alive	<60	female	white	Stage I	Endometrioid adenocarcinoma, NOS	G2	20.3244	NA	Post (prior bilateral ovariectomy OR >12 mo since LMP with no prior hysterectomy)	0	1555	158	1	NA	NA	1555	0	Notassigned	615	NA	6.00784
TCGA-AX-A06D-01A-11R-A118-07	TCGA-AX-A06D-01A	TCGA-AX-A06D-01	TCGA-AX-A06D	01A	0512be6b-9c9d-40b5-9ece-3a6c9ac4ecf8	NA	Dead	>=60	female	white	Stage III	Endometrioid adenocarcinoma, NOS	G2	35.5469	YES	Post (prior bilateral ovariectomy OR >12 mo since LMP with no prior hysterectomy)	1	373	253	1	NA	NA	373	1	Notassigned	449	NA	4.82386
TCGA-BS-A0U8-01A-11R-A104-07	TCGA-BS-A0U8-01A	TCGA-BS-A0U8-01	TCGA-BS-A0U8	01A	3e5fc5c2-999d-4c9e-a6c8-2fc4fbaad7c1	2963	Alive	<60	female	white	Stage III	Endometrioid adenocarcinoma, NOS	G1	28.3737	NO	Post (prior bilateral ovariectomy OR >12 mo since LMP with no prior hysterectomy)	0	2963	2963	0	2963	0	2963	0	MSI	325	NA	6.53954
TCGA-QS-A5YQ-01A-11R-A31O-07	TCGA-QS-A5YQ-01A	TCGA-QS-A5YQ-01	TCGA-QS-A5YQ	01A	e3fb8ce3-dc67-4f02-9e0b-41c2181ef0de	759	Alive	<60	female	black or african american	Stage III	Endometrioid adenocarcinoma, NOS	G1	32.4219	NO	Post (prior bilateral ovariectomy OR >12 mo since LMP with no prior hysterectomy)	0	759	759	0	759	0	759	0	Notassigned	130	NA	4.1964
TCGA-D1-A16R-01A-11R-A12I-07	TCGA-D1-A16R-01A	TCGA-D1-A16R-01	TCGA-D1-A16R	01A	6718463d-6f44-47c7-a622-c149f344ffbd	21	Alive	<60	female	white	Stage I	Endometrioid adenocarcinoma, NOS	G1	41.5332	NO	Indeterminate (neither Pre or Postmenopausal)	0	21	21	0	21	0	21	0	Notassigned	398	NA	5.94833
TCGA-A5-A0GP-01A-11R-A040-07	TCGA-A5-A0GP-01A	TCGA-A5-A0GP-01	TCGA-A5-A0GP	01A	48971185-4abe-4951-8e9a-cbdec7caaeae	1416	Alive	<60	female	asian	Stage I	Endometrioid adenocarcinoma, NOS	G1	23.4375	NO	Post (prior bilateral ovariectomy OR >12 mo since LMP with no prior hysterectomy)	0	1416	1416	0	1416	0	1416	0	POLE	573	NA	6.11434
TCGA-D1-A2G0-01A-11R-A32Y-07	TCGA-D1-A2G0-01A	TCGA-D1-A2G0-01	TCGA-D1-A2G0	01A	a6619a5f-fd99-49f8-8e41-2d28b8bd54db	1484	Alive	>=60	female	white	Stage I	Serous cystadenocarcinoma, NOS	G3	24.9649	NO	Post (prior bilateral ovariectomy OR >12 mo since LMP with no prior hysterectomy)	0	1484	1484	0	NA	NA	1484	0	Notassigned	78	NA	6.54746
TCGA-D1-A15W-01A-11R-A118-07	TCGA-D1-A15W-01A	TCGA-D1-A15W-01	TCGA-D1-A15W	01A	4a97b6ea-dabe-45f2-8824-45690886e506	915	Alive	<60	female	white	Stage III	Endometrioid adenocarcinoma, NOS	G1	46.281	YES	Post (prior bilateral ovariectomy OR >12 mo since LMP with no prior hysterectomy)	0	915	915	0	915	0	915	0	CN low	317	NA	6.41446
TCGA-AX-A0J1-01A-11R-A040-07	TCGA-AX-A0J1-01A	TCGA-AX-A0J1-01	TCGA-AX-A0J1	01A	e5ee0383-6fc3-4bd8-a7a7-5cf2c6e2bb99	2354	Alive	>=60	female	white	Stage I	Endometrioid adenocarcinoma, NOS	G2	22.2656	NA	Post (prior bilateral ovariectomy OR >12 mo since LMP with no prior hysterectomy)	0	2354	2354	0	2354	0	2354	0	MSI	262	NA	6.95138
TCGA-BS-A0UV-01A-11R-A16W-07	TCGA-BS-A0UV-01A	TCGA-BS-A0UV-01	TCGA-BS-A0UV	01A	1869f9e5-b9b7-4a59-86f8-6d327a180dbc	2228	Alive	<60	female	native hawaiian or other pacific islander	Stage III	Endometrioid adenocarcinoma, NOS	G3	39.6825	YES	Post (prior bilateral ovariectomy OR >12 mo since LMP with no prior hysterectomy)	0	2228	2228	0	2228	0	2228	0	POLE	574	NA	6.2426
TCGA-D1-A17R-01A-11R-A12I-07	TCGA-D1-A17R-01A	TCGA-D1-A17R-01	TCGA-D1-A17R	01A	9934181c-8472-45de-ba46-f5ff1863af25	NA	Dead	<60	female	white	Stage I	Endometrioid adenocarcinoma, NOS	G2	46.281	NO	Pre (<6 months since LMP AND no prior bilateral ovariectomy AND not on estrogen replacement)	1	339	339	0	339	0	339	0	MSI	333	NA	6.09835
TCGA-B5-A11V-01A-11R-A10J-07	TCGA-B5-A11V-01A	TCGA-B5-A11V-01	TCGA-B5-A11V	01A	9088aea9-d215-4eb7-b0d9-cb66b87d1f31	595	Alive	>=60	female	black or african american	Stage I	Endometrioid adenocarcinoma, NOS	G1	28.8044	YES	Post (prior bilateral ovariectomy OR >12 mo since LMP with no prior hysterectomy)	0	595	595	0	595	0	595	0	CN low	217	NA	6.08387
TCGA-AX-A1C5-01A-11R-A137-07	TCGA-AX-A1C5-01A	TCGA-AX-A1C5-01	TCGA-AX-A1C5	01A	8d38156f-5309-4b5d-a293-e1a0f1ada67b	1001	Alive	<60	female	white	Stage III	Endometrioid adenocarcinoma, NOS	G3	41.7969	NA	Indeterminate (neither Pre or Postmenopausal)	0	1001	1001	0	1001	0	1001	0	Notassigned	335	NA	6.16226
TCGA-EY-A215-01A-11R-A14M-07	TCGA-EY-A215-01A	TCGA-EY-A215-01	TCGA-EY-A215	01A	19445b77-3101-4b30-8e4e-87766610c0d0	574	Alive	>=60	female	white	Stage I	Endometrioid adenocarcinoma, NOS	G3	17.3611	NO	Post (prior bilateral ovariectomy OR >12 mo since LMP with no prior hysterectomy)	0	574	574	0	574	0	574	0	Notassigned	145	NA	6.06818
TCGA-AJ-A6NU-01A-11R-A34R-07	TCGA-AJ-A6NU-01A	TCGA-AJ-A6NU-01	TCGA-AJ-A6NU	01A	1a07e67a-d516-4957-b1fe-305a7f7f7a69	632	Alive	>=60	female	black or african american	Stage II	Endometrioid adenocarcinoma, NOS	G1	61.3407	NO	Post (prior bilateral ovariectomy OR >12 mo since LMP with no prior hysterectomy)	0	632	632	0	632	0	632	0	Notassigned	632	NA	6.78667
TCGA-A5-AB3J-01A-11R-A40A-07	TCGA-A5-AB3J-01A	TCGA-A5-AB3J-01	TCGA-A5-AB3J	01A	35f0d6a3-a27f-4359-b9d1-75c915f311fd	512	Alive	<60	female	black or african american	Stage II	Endometrioid adenocarcinoma, NOS	G2	23.0469	YES	Peri (6-12 months since last menstrual period)	0	512	512	0	512	0	512	0	Notassigned	473	NA	7.02456
TCGA-B5-A11Y-01A-21R-A10J-07	TCGA-B5-A11Y-01A	TCGA-B5-A11Y-01	TCGA-B5-A11Y	01A	9c0122db-33a6-4fb7-873e-12838fc7f8f0	560	Alive	<60	female	white	Stage I	Endometrioid adenocarcinoma, secretory variant	G1	24.0055	NA	Post (prior bilateral ovariectomy OR >12 mo since LMP with no prior hysterectomy)	0	560	560	0	560	0	560	0	CN low	552	NA	5.46246
TCGA-B5-A0K9-01A-21R-A104-07	TCGA-B5-A0K9-01A	TCGA-B5-A0K9-01	TCGA-B5-A0K9	01A	56f05f21-2d25-4471-9e51-f3cfd9332a8c	335	Dead	>=60	female	white	Stage II	Endometrioid adenocarcinoma, NOS	G1	25.3906	NA	Post (prior bilateral ovariectomy OR >12 mo since LMP with no prior hysterectomy)	1	409	409	0	409	0	409	0	Notassigned	195	NA	6.86328
TCGA-PG-A916-01A-11R-A37O-07	TCGA-PG-A916-01A	TCGA-PG-A916-01	TCGA-PG-A916	01A	a3e5735d-a095-404b-902f-39c8589ac67e	522	Alive	>=60	female	black or african american	Stage I	Endometrioid adenocarcinoma, NOS	G2	NA	NO	Post (prior bilateral ovariectomy OR >12 mo since LMP with no prior hysterectomy)	0	522	522	0	522	0	522	0	Notassigned	386	NA	6.6339
TCGA-EO-A2CH-01A-11R-A180-07	TCGA-EO-A2CH-01A	TCGA-EO-A2CH-01	TCGA-EO-A2CH	01A	dc5a3457-e098-4572-86c7-d58e6ecef772	NA	Dead	>=60	female	not reported	Stage IV	Serous cystadenocarcinoma, NOS	G3	28.5665	YES	Post (prior bilateral ovariectomy OR >12 mo since LMP with no prior hysterectomy)	1	590	304	1	NA	NA	590	1	Notassigned	135	NA	7.23114
TCGA-DI-A1BU-01A-11R-A137-07	TCGA-DI-A1BU-01A	TCGA-DI-A1BU-01	TCGA-DI-A1BU	01A	d340b888-151f-443f-950b-f9e5555509fa	1195	Alive	<60	female	white	Stage II	Serous cystadenocarcinoma, NOS	G3	31.8047	NO	NA	0	1195	1195	0	1195	0	1195	0	Notassigned	125	NA	5.15771
TCGA-AJ-A3TW-01A-11R-A22K-07	TCGA-AJ-A3TW-01A	TCGA-AJ-A3TW-01	TCGA-AJ-A3TW	01A	b8b261ea-afc3-48b5-9660-eb2ad1c525f8	513	Alive	>=60	female	white	Stage I	Serous cystadenocarcinoma, NOS	G3	21.4844	NO	Post (prior bilateral ovariectomy OR >12 mo since LMP with no prior hysterectomy)	0	513	513	0	513	0	513	0	Notassigned	560	NA	6.72836
TCGA-D1-A3DA-01A-12R-A213-07	TCGA-D1-A3DA-01A	TCGA-D1-A3DA-01	TCGA-D1-A3DA	01A	2bc73f03-f0e3-4e41-b909-d9d89405e09c	483	Alive	>=60	female	white	Stage III	Endometrioid adenocarcinoma, NOS	G3	24.6711	NO	Post (prior bilateral ovariectomy OR >12 mo since LMP with no prior hysterectomy)	0	483	483	0	483	0	483	0	Notassigned	67	NA	6.68636
TCGA-BS-A0TD-01A-11R-A104-07	TCGA-BS-A0TD-01A	TCGA-BS-A0TD-01	TCGA-BS-A0TD	01A	147ef440-83e0-4363-a888-24d3dff94c9e	2379	Alive	>=60	female	asian	Stage I	Endometrioid adenocarcinoma, NOS	G1	35.3798	YES	Post (prior bilateral ovariectomy OR >12 mo since LMP with no prior hysterectomy)	0	2379	2379	0	2379	0	2379	0	CN low	97	NA	5.43778
TCGA-EY-A2OM-01A-11R-A18M-07	TCGA-EY-A2OM-01A	TCGA-EY-A2OM-01	TCGA-EY-A2OM	01A	de2ca9be-10dc-47dd-9101-44dc02b2bdce	694	Alive	<60	female	white	Stage I	Endometrioid adenocarcinoma, NOS	G3	47.6108	NO	Post (prior bilateral ovariectomy OR >12 mo since LMP with no prior hysterectomy)	0	694	694	0	694	0	694	0	Notassigned	142	NA	6.37383
TCGA-PG-A914-01A-11R-A37O-07	TCGA-PG-A914-01A	TCGA-PG-A914-01	TCGA-PG-A914	01A	23ce4368-9d6a-4fc8-a1aa-661414dbc180	687	Alive	>=60	female	black or african american	Stage I	Serous surface papillary carcinoma	G3	NA	NA	Post (prior bilateral ovariectomy OR >12 mo since LMP with no prior hysterectomy)	0	687	687	0	687	0	687	0	Notassigned	275	NA	7.08757
TCGA-A5-A0GQ-01A-11R-A118-07	TCGA-A5-A0GQ-01A	TCGA-A5-A0GQ-01	TCGA-A5-A0GQ	01A	b7e225b7-54a3-4c98-9164-50596ed047ee	2247	Alive	>=60	female	white	Stage I	Endometrioid adenocarcinoma, NOS	G1	25.3333	NO	Post (prior bilateral ovariectomy OR >12 mo since LMP with no prior hysterectomy)	0	2247	2247	0	2247	0	2247	0	CN low	80	NA	4.01998
TCGA-AP-A051-01A-21R-A00V-07	TCGA-AP-A051-01A	TCGA-AP-A051-01	TCGA-AP-A051	01A	3d71658d-130e-48ad-ae66-05a127c2196c	3948	Alive	>=60	female	white	Stage I	Endometrioid adenocarcinoma, NOS	G3	38.3687	NA	Post (prior bilateral ovariectomy OR >12 mo since LMP with no prior hysterectomy)	0	3948	3948	0	3948	0	3948	0	POLE	115	NA	7.04622
TCGA-FI-A2EW-01A-11R-A17B-07	TCGA-FI-A2EW-01A	TCGA-FI-A2EW-01	TCGA-FI-A2EW	01A	0ee88d9c-2f83-4a34-aff5-c94e27a83c8d	1795	Alive	>=60	female	black or african american	Stage II	Serous cystadenocarcinoma, NOS	G3	32.4219	NO	Post (prior bilateral ovariectomy OR >12 mo since LMP with no prior hysterectomy)	0	1795	1169	1	1169	1	1795	0	CN high	141	NA	6.3082
TCGA-AX-A05S-01A-11R-A00V-07	TCGA-AX-A05S-01A	TCGA-AX-A05S-01	TCGA-AX-A05S	01A	7e6a0574-9d6d-42b6-9275-2fecc7587c0f	NA	Dead	>=60	female	white	Stage III	Endometrioid adenocarcinoma, NOS	G3	20.7756	NO	Post (prior bilateral ovariectomy OR >12 mo since LMP with no prior hysterectomy)	1	413	338	1	NA	NA	413	1	MSI	394	NA	6.24228
TCGA-BK-A26L-01A-11R-A277-07	TCGA-BK-A26L-01A	TCGA-BK-A26L-01	TCGA-BK-A26L	01A	44f36689-d1f0-49e8-a34d-5adecf1bd738	734	Alive	>=60	female	white	Stage III	Serous cystadenocarcinoma, NOS	G3	32.4619	NO	Post (prior bilateral ovariectomy OR >12 mo since LMP with no prior hysterectomy)	0	734	734	0	734	0	734	0	Notassigned	526	NA	7.35809
TCGA-AJ-A3I9-01A-11R-A22K-07	TCGA-AJ-A3I9-01A	TCGA-AJ-A3I9-01	TCGA-AJ-A3I9	01A	47b71b49-52e7-4044-96e4-cb79775b50ca	39	Dead	<60	female	white	Stage II	Endometrioid adenocarcinoma, NOS	G3	28.125	NO	Post (prior bilateral ovariectomy OR >12 mo since LMP with no prior hysterectomy)	1	519	370	1	370	1	519	1	Notassigned	450	NA	6.72412
TCGA-DF-A2KN-01A-11R-A180-07	TCGA-DF-A2KN-01A	TCGA-DF-A2KN-01	TCGA-DF-A2KN	01A	829c5a9a-cc8f-48f9-8a44-7abe9e57d67f	67	Alive	NA	female	not reported	Stage I	Endometrioid adenocarcinoma, NOS	G3	33.3276	NA	Post (prior bilateral ovariectomy OR >12 mo since LMP with no prior hysterectomy)	0	67	67	0	67	0	67	0	Notassigned	445	NA	5.73833
TCGA-BG-A0M4-01A-11R-A104-07	TCGA-BG-A0M4-01A	TCGA-BG-A0M4-01	TCGA-BG-A0M4	01A	4d3f23b7-71d2-4787-9279-e817961ca6c0	2167	Alive	>=60	female	white	Stage I	Endometrioid adenocarcinoma, NOS	G3	30.6148	NA	Post (prior bilateral ovariectomy OR >12 mo since LMP with no prior hysterectomy)	0	2167	2167	0	2167	0	2167	0	MSI	622	NA	6.26047
TCGA-B5-A11Q-01A-11R-A118-07	TCGA-B5-A11Q-01A	TCGA-B5-A11Q-01	TCGA-B5-A11Q	01A	fc2dab28-c31b-40cb-b0d3-223016540d64	976	Alive	>=60	female	white	Stage III	Endometrioid adenocarcinoma, NOS	G1	33.9493	NA	Post (prior bilateral ovariectomy OR >12 mo since LMP with no prior hysterectomy)	0	976	976	0	976	0	976	0	CN low	139	NA	6.08686
TCGA-BS-A0TJ-01A-11R-A104-07	TCGA-BS-A0TJ-01A	TCGA-BS-A0TJ-01	TCGA-BS-A0TJ	01A	59873db0-9edb-42e9-aecc-7108c0176909	2068	Alive	<60	female	asian	Stage I	Endometrioid adenocarcinoma, NOS	G3	38.0886	NO	Post (prior bilateral ovariectomy OR >12 mo since LMP with no prior hysterectomy)	0	2068	2068	0	2068	0	2068	0	MSI	224	NA	6.70759
TCGA-A5-A0G5-01A-11R-A040-07	TCGA-A5-A0G5-01A	TCGA-A5-A0G5-01	TCGA-A5-A0G5	01A	e4d205e3-b6d2-495d-b81b-d7b64c08d5e1	1126	Alive	>=60	female	black or african american	Stage I	Clear cell adenocarcinoma, NOS	G3	18.75	NO	Post (prior bilateral ovariectomy OR >12 mo since LMP with no prior hysterectomy)	0	1126	1126	0	1126	0	1126	0	CN high	329	NA	6.67535
TCGA-D1-A161-01A-11R-A118-07	TCGA-D1-A161-01A	TCGA-D1-A161-01	TCGA-D1-A161	01A	a4bf94ae-15f5-46ff-8eff-8d26a4d04150	892	Alive	>=60	female	white	Stage I	Endometrioid adenocarcinoma, NOS	G1	28.0843	NO	Post (prior bilateral ovariectomy OR >12 mo since LMP with no prior hysterectomy)	0	892	892	0	892	0	892	0	CN low	390	NA	5.54264
TCGA-BK-A6W4-01A-12R-A34R-07	TCGA-BK-A6W4-01A	TCGA-BK-A6W4-01	TCGA-BK-A6W4	01A	807a2ba6-e22e-481e-92b6-557acca36460	300	Alive	>=60	female	black or african american	Stage I	Endometrioid adenocarcinoma, NOS	G2	43.4095	YES	Post (prior bilateral ovariectomy OR >12 mo since LMP with no prior hysterectomy)	0	300	300	0	300	0	300	0	Notassigned	194	NA	7.11851
TCGA-D1-A2G5-01A-11R-A17B-07	TCGA-D1-A2G5-01A	TCGA-D1-A2G5-01	TCGA-D1-A2G5	01A	2472d7e6-bda7-4bfc-a51a-8d779c74eeb4	1455	Alive	<60	female	white	Stage I	Endometrioid adenocarcinoma, NOS	G3	47.7797	NO	Post (prior bilateral ovariectomy OR >12 mo since LMP with no prior hysterectomy)	0	1455	1122	1	1122	1	1455	0	Notassigned	247	NA	6.27205
TCGA-AX-A2H5-01A-11R-A17B-07	TCGA-AX-A2H5-01A	TCGA-AX-A2H5-01	TCGA-AX-A2H5	01A	2674a752-7508-4135-a3c0-0190af6bc28d	2167	Alive	>=60	female	black or african american	Stage III	Serous cystadenocarcinoma, NOS	G3	33.5635	NA	NA	0	2167	2167	0	2167	0	2167	0	CN high	510	NA	4.493
TCGA-AX-A06H-01A-11R-A118-07	TCGA-AX-A06H-01A	TCGA-AX-A06H-01	TCGA-AX-A06H	01A	2f3c5a2b-9732-4989-8aa4-8683157b4f11	833	Alive	>=60	female	american indian or alaska native	Stage III	Endometrioid adenocarcinoma, NOS	G1	38.2812	NA	Post (prior bilateral ovariectomy OR >12 mo since LMP with no prior hysterectomy)	0	833	833	0	833	0	833	0	MSI	327	NA	5.72562
TCGA-D1-A167-01A-11R-A12I-07	TCGA-D1-A167-01A	TCGA-D1-A167-01	TCGA-D1-A167	01A	73f5210f-43d7-4859-89ba-5ef66f7bf66d	478	Alive	>=60	female	white	Stage I	Endometrioid adenocarcinoma, NOS	G2	31.1634	NO	Post (prior bilateral ovariectomy OR >12 mo since LMP with no prior hysterectomy)	0	478	478	0	478	0	478	0	MSI	465	NA	7.50176
TCGA-AX-A2IO-01A-11R-A180-07	TCGA-AX-A2IO-01A	TCGA-AX-A2IO-01	TCGA-AX-A2IO	01A	9b2a6e97-406d-4f56-8501-724de5137139	1975	Alive	>=60	female	white	Stage II	Serous cystadenocarcinoma, NOS	G3	24.3865	NA	Post (prior bilateral ovariectomy OR >12 mo since LMP with no prior hysterectomy)	0	1975	1975	0	NA	NA	1975	0	Notassigned	453	NA	7.28093
TCGA-B5-A1MW-01A-11R-A32Y-07	TCGA-B5-A1MW-01A	TCGA-B5-A1MW-01	TCGA-B5-A1MW	01A	7ddd6269-658e-4ef3-956b-9d095b4eec30	447	Alive	<60	female	white	Stage I	Endometrioid adenocarcinoma, NOS	G3	23.3355	NA	Post (prior bilateral ovariectomy OR >12 mo since LMP with no prior hysterectomy)	0	447	311	1	311	1	447	0	Notassigned	347	NA	7.25767
TCGA-B5-A0JV-01A-11R-A104-07	TCGA-B5-A0JV-01A	TCGA-B5-A0JV-01	TCGA-B5-A0JV	01A	29ddc0f0-206c-460b-92e7-f27f244799be	2616	Alive	>=60	female	black or african american	Stage I	Endometrioid adenocarcinoma, NOS	G2	34.1124	NA	Post (prior bilateral ovariectomy OR >12 mo since LMP with no prior hysterectomy)	0	2616	698	1	698	1	2616	0	MSI	300	NA	6.95243
TCGA-AP-A05P-01A-11R-A16W-07	TCGA-AP-A05P-01A	TCGA-AP-A05P-01	TCGA-AP-A05P	01A	a6b99059-69a8-4935-8f69-d0e9ee30ea5a	636	Alive	<60	female	asian	Stage I	Endometrioid adenocarcinoma, NOS	G1	28.5483	NA	Pre (<6 months since LMP AND no prior bilateral ovariectomy AND not on estrogen replacement)	0	636	636	0	636	0	636	0	CN low	344	NA	6.75411
TCGA-B5-A0JS-01A-11R-A104-07	TCGA-B5-A0JS-01A	TCGA-B5-A0JS-01	TCGA-B5-A0JS	01A	3c603370-b004-4265-802d-c71574eda3fa	2627	Alive	<60	female	white	Stage I	Endometrioid adenocarcinoma, NOS	G1	38.0623	NO	Post (prior bilateral ovariectomy OR >12 mo since LMP with no prior hysterectomy)	0	2627	2627	0	2627	0	2627	0	CN low	418	NA	5.55975
TCGA-AX-A1C4-01A-11R-A137-07	TCGA-AX-A1C4-01A	TCGA-AX-A1C4-01	TCGA-AX-A1C4	01A	8cd4eabb-e640-4172-ae74-c1c79784d1aa	404	Alive	<60	female	white	Stage I	Endometrioid adenocarcinoma, NOS	G2	36.2959	YES	Indeterminate (neither Pre or Postmenopausal)	0	404	404	0	NA	NA	404	0	Notassigned	461	NA	5.63762
TCGA-AX-A0IZ-01A-11R-A118-07	TCGA-AX-A0IZ-01A	TCGA-AX-A0IZ-01	TCGA-AX-A0IZ	01A	b30e9f3a-ecb5-4fb6-8861-80861f4075b4	1333	Alive	<60	female	white	Stage I	Endometrioid adenocarcinoma, NOS	G3	23.4375	NA	Post (prior bilateral ovariectomy OR >12 mo since LMP with no prior hysterectomy)	0	1333	1333	0	1333	0	1333	0	Notassigned	256	NA	6.50513
TCGA-AJ-A23M-01A-11R-A157-07	TCGA-AJ-A23M-01A	TCGA-AJ-A23M-01	TCGA-AJ-A23M	01A	b0a83827-e3bd-4458-95cd-7a5b1ef6c5c4	36	Dead	>=60	female	white	Stage II	Serous cystadenocarcinoma, NOS	G3	61.0284	YES	Post (prior bilateral ovariectomy OR >12 mo since LMP with no prior hysterectomy)	1	616	516	1	NA	NA	616	1	CN high	476	NA	7.21359
TCGA-DF-A2L0-01A-11R-A180-07	TCGA-DF-A2L0-01A	TCGA-DF-A2L0-01	TCGA-DF-A2L0	01A	dc1637a7-e6ab-4e2d-bcf7-aafe245df5aa	NA	Dead	>=60	female	not reported	Stage III	Endometrioid adenocarcinoma, NOS	G3	33.6593	NO	Post (prior bilateral ovariectomy OR >12 mo since LMP with no prior hysterectomy)	1	788	523	1	523	1	788	1	Notassigned	416	NA	4.40033
TCGA-D1-A16E-01A-22R-A12I-07	TCGA-D1-A16E-01A	TCGA-D1-A16E-01	TCGA-D1-A16E	01A	b5c1b64f-e2ef-4e89-84d1-0de8171ee3e6	1119	Alive	>=60	female	white	Stage I	Endometrioid adenocarcinoma, NOS	G1	25.2994	NO	Post (prior bilateral ovariectomy OR >12 mo since LMP with no prior hysterectomy)	0	1119	1119	0	1119	0	1119	0	CN low	140	NA	5.3905
TCGA-AP-A0LT-01A-11R-A040-07	TCGA-AP-A0LT-01A	TCGA-AP-A0LT-01	TCGA-AP-A0LT	01A	9fd459e5-13e0-4a7e-a3b5-cea50ca677ad	1497	Alive	<60	female	white	Stage II	Endometrioid adenocarcinoma, NOS	G2	33.4252	NA	Post (prior bilateral ovariectomy OR >12 mo since LMP with no prior hysterectomy)	0	1497	1497	0	1497	0	1497	0	MSI	620	NA	5.96166
TCGA-D1-A2G7-01A-21R-A180-07	TCGA-D1-A2G7-01A	TCGA-D1-A2G7-01	TCGA-D1-A2G7	01A	05d0a2e7-0395-493c-a415-6f695b001786	1365	Dead	>=60	female	white	Stage I	Serous cystadenocarcinoma, NOS	G3	49.4497	YES	Peri (6-12 months since last menstrual period)	1	1793	1793	0	1793	0	1793	0	Notassigned	463	NA	7.23049
TCGA-AX-A2HG-01A-11R-A17B-07	TCGA-AX-A2HG-01A	TCGA-AX-A2HG-01	TCGA-AX-A2HG	01A	039a08ac-3493-45b3-80a6-82be78c018cf	1163	Alive	<60	female	white	Stage I	Endometrioid adenocarcinoma, NOS	G3	46.655	NA	Post (prior bilateral ovariectomy OR >12 mo since LMP with no prior hysterectomy)	0	1163	1163	0	1163	0	1163	0	Notassigned	541	NA	5.86764
TCGA-BG-A0VX-01A-11R-A118-07	TCGA-BG-A0VX-01A	TCGA-BG-A0VX-01	TCGA-BG-A0VX	01A	ce7375f7-b7ef-48cf-897a-59d5df6253da	1043	Alive	<60	female	white	Stage I	Endometrioid adenocarcinoma, NOS	G1	67.9536	NO	Post (prior bilateral ovariectomy OR >12 mo since LMP with no prior hysterectomy)	0	1043	1043	0	1043	0	1043	0	CN low	383	NA	6.17301
TCGA-D1-A1NZ-01A-21R-A14D-07	TCGA-D1-A1NZ-01A	TCGA-D1-A1NZ-01	TCGA-D1-A1NZ	01A	c0982e31-0ce2-422d-890b-538ae585b69e	548	Alive	>=60	female	white	Stage I	Endometrioid adenocarcinoma, NOS	G1	35.5999	NO	Post (prior bilateral ovariectomy OR >12 mo since LMP with no prior hysterectomy)	0	548	548	0	548	0	548	0	Notassigned	332	NA	5.64585
TCGA-BG-A0LW-01A-11R-A16W-07	TCGA-BG-A0LW-01A	TCGA-BG-A0LW-01	TCGA-BG-A0LW	01A	7298e35d-8405-4662-bc88-6d9fecb41286	566	Alive	<60	female	white	Stage I	Endometrioid adenocarcinoma, NOS	G2	57.2031	NA	Indeterminate (neither Pre or Postmenopausal)	0	566	566	0	566	0	566	0	CN low	410	NA	6.50001
TCGA-BS-A0WQ-01A-21R-A109-07	TCGA-BS-A0WQ-01A	TCGA-BS-A0WQ-01	TCGA-BS-A0WQ	01A	9c6906c3-a740-4231-88eb-54954e3ee8f6	2022	Alive	<60	female	asian	Stage I	Endometrioid adenocarcinoma, NOS	G2	36.3281	YES	Post (prior bilateral ovariectomy OR >12 mo since LMP with no prior hysterectomy)	0	2022	2022	0	2022	0	2022	0	CN low	605	NA	4.96943
TCGA-D1-A3DG-01A-11R-A19W-07	TCGA-D1-A3DG-01A	TCGA-D1-A3DG-01	TCGA-D1-A3DG	01A	9ed0c44a-f621-4b68-97ce-e9dd91b13e19	130	Dead	>=60	female	white	Stage IV	Endometrioid adenocarcinoma, NOS	G3	30.4705	NO	Post (prior bilateral ovariectomy OR >12 mo since LMP with no prior hysterectomy)	1	130	130	0	NA	NA	130	0	Notassigned	520	NA	7.77003
TCGA-D1-A174-01A-11R-A12I-07	TCGA-D1-A174-01A	TCGA-D1-A174-01	TCGA-D1-A174	01A	f5bbc13e-b623-4367-bb4d-2a11e361bc6c	594	Alive	<60	female	white	Stage I	Endometrioid adenocarcinoma, NOS	G3	26.3702	NO	Indeterminate (neither Pre or Postmenopausal)	0	594	594	0	594	0	594	0	MSI	524	NA	4.59128
TCGA-A5-A0G2-01A-11R-A16W-07	TCGA-A5-A0G2-01A	TCGA-A5-A0G2-01	TCGA-A5-A0G2	01A	9f909512-d56f-4fcf-b5a3-c09f6599376c	4549	Alive	<60	female	asian	Stage III	Serous cystadenocarcinoma, NOS	G3	25.9695	NO	Post (prior bilateral ovariectomy OR >12 mo since LMP with no prior hysterectomy)	0	4549	4549	0	4549	0	4549	0	Notassigned	630	NA	5.63091
TCGA-KP-A3W4-01A-11R-A22K-07	TCGA-KP-A3W4-01A	TCGA-KP-A3W4-01	TCGA-KP-A3W4	01A	b7702969-1700-48d3-a296-826bab641154	NA	Dead	>=60	female	white	Stage III	Serous cystadenocarcinoma, NOS	G3	26.7532	NA	Post (prior bilateral ovariectomy OR >12 mo since LMP with no prior hysterectomy)	1	554	321	1	NA	NA	554	1	Notassigned	503	NA	7.55914
TCGA-EY-A5W2-01A-11R-A31O-07	TCGA-EY-A5W2-01A	TCGA-EY-A5W2-01	TCGA-EY-A5W2	01A	da44bb3a-dcb0-4894-a51e-1759334203e7	516	Alive	>=60	female	black or african american	Stage I	Endometrioid adenocarcinoma, NOS	G3	32.0204	NA	Post (prior bilateral ovariectomy OR >12 mo since LMP with no prior hysterectomy)	0	516	516	0	516	0	516	0	Notassigned	294	NA	6.19804
TCGA-D1-A0ZQ-01A-11R-A118-07	TCGA-D1-A0ZQ-01A	TCGA-D1-A0ZQ-01	TCGA-D1-A0ZQ	01A	9da2fda3-2abd-405d-b918-9808b580f849	0	Alive	>=60	female	white	Stage I	Endometrioid adenocarcinoma, NOS	G2	28.7201	NO	Post (prior bilateral ovariectomy OR >12 mo since LMP with no prior hysterectomy)	0	260	260	0	260	0	260	0	CN low	156	NA	6.32565
TCGA-BS-A0U7-01A-21R-A104-07	TCGA-BS-A0U7-01A	TCGA-BS-A0U7-01	TCGA-BS-A0U7	01A	2c72d011-d410-4fed-be75-6d2d1a0e5d68	NA	Dead	>=60	female	white	Stage I	Endometrioid adenocarcinoma, NOS	G2	24.2424	NO	Post (prior bilateral ovariectomy OR >12 mo since LMP with no prior hysterectomy)	1	935	935	0	935	0	935	0	MSI	623	NA	6.46722
TCGA-A5-A0R9-01A-11R-A104-07	TCGA-A5-A0R9-01A	TCGA-A5-A0R9-01	TCGA-A5-A0R9	01A	2d5509a1-627d-4182-b727-a6c8f27182e2	749	Alive	<60	female	white	Stage I	Endometrioid adenocarcinoma, NOS	G2	54.5749	NO	Post (prior bilateral ovariectomy OR >12 mo since LMP with no prior hysterectomy)	0	749	749	0	749	0	749	0	CN low	280	NA	4.99761
TCGA-AP-A1E3-01A-11R-A137-07	TCGA-AP-A1E3-01A	TCGA-AP-A1E3-01	TCGA-AP-A1E3	01A	765f93ff-94a2-423d-949d-c6fba247f056	847	Alive	<60	female	white	Stage III	Endometrioid adenocarcinoma, NOS	G3	48.9292	NO	Pre (<6 months since LMP AND no prior bilateral ovariectomy AND not on estrogen replacement)	0	847	847	0	NA	NA	847	0	Notassigned	439	NA	4.04314
TCGA-AX-A2HA-01A-12R-A18M-07	TCGA-AX-A2HA-01A	TCGA-AX-A2HA-01	TCGA-AX-A2HA	01A	c61f1eb8-556d-4121-b3fb-c3e239b370e7	2475	Alive	<60	female	white	Stage I	Endometrioid adenocarcinoma, NOS	G3	21.5139	NO	NA	0	2475	2475	0	2475	0	2475	0	Notassigned	284	NA	6.15531
TCGA-D1-A0ZV-01A-11R-A10J-07	TCGA-D1-A0ZV-01A	TCGA-D1-A0ZV-01	TCGA-D1-A0ZV	01A	05d307d9-476b-4e15-bb31-ac207b2ba41f	728	Alive	<60	female	white	Stage I	Endometrioid adenocarcinoma, NOS	G2	26.6436	NO	Post (prior bilateral ovariectomy OR >12 mo since LMP with no prior hysterectomy)	0	728	728	0	728	0	728	0	CN low	352	NA	4.55001
TCGA-B5-A0JY-01A-11R-A104-07	TCGA-B5-A0JY-01A	TCGA-B5-A0JY-01	TCGA-B5-A0JY	01A	db9cb4ae-07f5-4599-9e0b-b2289cc487d9	2107	Alive	<60	female	white	Stage III	Carcinoma, undifferentiated, NOS	G3	23.7387	NO	Post (prior bilateral ovariectomy OR >12 mo since LMP with no prior hysterectomy)	0	2107	2107	0	2107	0	2107	0	POLE	377	NA	4.66879
TCGA-B5-A11E-01A-11R-A10J-07	TCGA-B5-A11E-01A	TCGA-B5-A11E-01	TCGA-B5-A11E	01A	6f73a012-899f-46a6-963f-4c04a3c6af2b	1820	Alive	<60	female	white	Stage I	Endometrioid adenocarcinoma, NOS	G3	19.1001	NA	Peri (6-12 months since last menstrual period)	0	1820	1820	0	1820	0	1820	0	POLE	595	NA	7.43719
TCGA-BG-A186-01A-11R-A12I-07	TCGA-BG-A186-01A	TCGA-BG-A186-01	TCGA-BG-A186	01A	214efa45-5afd-4e99-a9df-1f6588a9a7c3	419	Alive	>=60	female	black or african american	Stage III	Endometrioid adenocarcinoma, NOS	G2	28.578	NO	NA	0	419	419	0	419	0	419	0	CN low	512	NA	7.01976
TCGA-D1-A16O-01A-11R-A12I-07	TCGA-D1-A16O-01A	TCGA-D1-A16O-01	TCGA-D1-A16O	01A	7bb80284-9ca7-48de-9d04-a5b0b6a15b68	1023	Alive	<60	female	white	Stage I	Endometrioid adenocarcinoma, NOS	G1	35.713	NO	Post (prior bilateral ovariectomy OR >12 mo since LMP with no prior hysterectomy)	0	1023	1023	0	1023	0	1023	0	CN low	507	NA	6.12602
TCGA-AX-A2HJ-01A-11R-A17B-07	TCGA-AX-A2HJ-01A	TCGA-AX-A2HJ-01	TCGA-AX-A2HJ	01A	4f86342d-56a1-4508-9f90-58530b3bd952	935	Alive	<60	female	asian	Stage I	Endometrioid adenocarcinoma, NOS	G3	24.2382	NA	NA	0	935	935	0	935	0	935	0	Notassigned	297	NA	6.17053
TCGA-KP-A3VZ-01A-11R-A22K-07	TCGA-KP-A3VZ-01A	TCGA-KP-A3VZ-01	TCGA-KP-A3VZ	01A	d097d365-93c6-406b-a3fd-31416eba96a0	722	Alive	>=60	female	white	Stage IV	Serous cystadenocarcinoma, NOS	G3	20.7008	NA	Post (prior bilateral ovariectomy OR >12 mo since LMP with no prior hysterectomy)	0	722	722	0	NA	NA	722	0	Notassigned	434	NA	7.822
TCGA-AX-A05T-01A-11R-A00V-07	TCGA-AX-A05T-01A	TCGA-AX-A05T-01	TCGA-AX-A05T	01A	af1598cb-dea5-45dd-861b-8c0df85f8951	1010	Alive	>=60	female	white	Stage I	Endometrioid adenocarcinoma, NOS	G1	23.533	NA	Post (prior bilateral ovariectomy OR >12 mo since LMP with no prior hysterectomy)	0	1010	1010	0	1010	0	1010	0	CN low	504	NA	7.39795
TCGA-AJ-A3BD-01A-11R-A19W-07	TCGA-AJ-A3BD-01A	TCGA-AJ-A3BD-01	TCGA-AJ-A3BD	01A	79551526-ab6b-4ceb-a0bb-eb81573ddd11	1039	Alive	<60	female	white	Stage III	Papillary serous cystadenocarcinoma	G3	36.7902	NO	Post (prior bilateral ovariectomy OR >12 mo since LMP with no prior hysterectomy)	0	1039	1039	0	1039	0	1039	0	Notassigned	540	NA	5.85339
TCGA-AP-A0LS-01A-11R-A14D-07	TCGA-AP-A0LS-01A	TCGA-AP-A0LS-01	TCGA-AP-A0LS	01A	d5751803-11a6-484f-af04-4e234db3c5de	2904	Alive	>=60	female	white	Stage I	Endometrioid adenocarcinoma, NOS	G2	28.3604	NA	Post (prior bilateral ovariectomy OR >12 mo since LMP with no prior hysterectomy)	0	2904	2904	0	2904	0	2904	0	Notassigned	393	NA	6.13679
TCGA-AX-A0IS-01A-12R-A10J-07	TCGA-AX-A0IS-01A	TCGA-AX-A0IS-01	TCGA-AX-A0IS	01A	ef23aadc-bbe0-4070-b3b1-4e5d84b0e0ea	1541	Dead	<60	female	white	Stage I	Endometrioid adenocarcinoma, NOS	G2	46.7687	NA	Post (prior bilateral ovariectomy OR >12 mo since LMP with no prior hysterectomy)	1	1858	448	1	448	1	1858	1	CN low	355	NA	7.07785
TCGA-B5-A11I-01A-11R-A10J-07	TCGA-B5-A11I-01A	TCGA-B5-A11I-01	TCGA-B5-A11I	01A	5d94f92f-2991-4c5c-9bcc-8c2daee4c907	2303	Alive	>=60	female	black or african american	Stage IV	Adenocarcinoma, NOS	G3	49.0487	YES	Post (prior bilateral ovariectomy OR >12 mo since LMP with no prior hysterectomy)	0	2303	705	1	NA	NA	2303	0	CN high	338	NA	6.01942
TCGA-AP-A0LJ-01A-11R-A040-07	TCGA-AP-A0LJ-01A	TCGA-AP-A0LJ-01	TCGA-AP-A0LJ	01A	e5c4a8d4-f43f-4dc6-913d-3b2005326fc2	1421	Alive	<60	female	white	Stage I	Endometrioid adenocarcinoma, NOS	G1	34.626	NA	Pre (<6 months since LMP AND no prior bilateral ovariectomy AND not on estrogen replacement)	0	1421	1421	0	1421	0	1421	0	CN low	401	NA	5.07578
TCGA-AJ-A3QS-01A-11R-A22K-07	TCGA-AJ-A3QS-01A	TCGA-AJ-A3QS-01	TCGA-AJ-A3QS	01A	244e24cc-fd21-4c32-b64a-738c431d906a	513	Alive	<60	female	black or african american	Stage III	Serous cystadenocarcinoma, NOS	G3	26.079	YES	Post (prior bilateral ovariectomy OR >12 mo since LMP with no prior hysterectomy)	0	513	513	0	513	0	513	0	Notassigned	209	NA	7.00639
TCGA-DI-A1NO-01A-31R-A157-07	TCGA-DI-A1NO-01A	TCGA-DI-A1NO-01	TCGA-DI-A1NO	01A	460a0ee4-9f91-46ce-9121-fdbb30efa9cc	NA	Dead	>=60	female	black or african american	Stage III	Endometrioid adenocarcinoma, NOS	G3	44.2735	YES	Post (prior bilateral ovariectomy OR >12 mo since LMP with no prior hysterectomy)	1	285	285	1	NA	NA	285	1	Notassigned	640	NA	7.80504
TCGA-BG-A0M7-01A-11R-A040-07	TCGA-BG-A0M7-01A	TCGA-BG-A0M7-01	TCGA-BG-A0M7	01A	1a35e230-2471-4965-8b00-7c1ae932d3a8	1937	Alive	>=60	female	white	Stage III	Endometrioid adenocarcinoma, NOS	G2	39.8438	NA	Post (prior bilateral ovariectomy OR >12 mo since LMP with no prior hysterectomy)	0	1937	1937	0	1937	0	1937	0	CN low	191	NA	5.88954
TCGA-D1-A17T-01A-11R-A12I-07	TCGA-D1-A17T-01A	TCGA-D1-A17T-01	TCGA-D1-A17T	01A	c59d226c-73f2-4d14-8af9-5130673f9cd7	71	Alive	>=60	female	white	Stage I	Endometrioid adenocarcinoma, NOS	G2	32.831	NO	Post (prior bilateral ovariectomy OR >12 mo since LMP with no prior hysterectomy)	0	71	71	0	71	0	71	0	CN low	486	NA	4.49823
TCGA-BK-A0C9-01A-11R-A00V-07	TCGA-BK-A0C9-01A	TCGA-BK-A0C9-01	TCGA-BK-A0C9	01A	997d54bb-066b-4b62-a6f7-7963a75b8f65	1092	Alive	<60	female	white	Stage I	Endometrioid adenocarcinoma, NOS	G1	44.9972	NO	Post (prior bilateral ovariectomy OR >12 mo since LMP with no prior hysterectomy)	0	1092	1092	0	1092	0	1092	0	MSI	597	NA	4.77474
TCGA-B5-A0K2-01A-12R-A104-07	TCGA-B5-A0K2-01A	TCGA-B5-A0K2-01	TCGA-B5-A0K2	01A	0bf230e0-4ba6-4fcd-a32b-8ae82ed87e33	2209	Alive	<60	female	white	Stage III	Endometrioid adenocarcinoma, NOS	G1	33.2265	NO	Indeterminate (neither Pre or Postmenopausal)	0	2209	2209	0	2209	0	2209	0	MSI	425	NA	5.96564
TCGA-BG-A0MA-01A-11R-A17B-07	TCGA-BG-A0MA-01A	TCGA-BG-A0MA-01	TCGA-BG-A0MA	01A	bf96da08-98b9-4f16-95f6-c73f1e70c312	NA	Dead	>=60	female	white	Stage I	Endometrioid adenocarcinoma, NOS	G3	38.4083	NA	Post (prior bilateral ovariectomy OR >12 mo since LMP with no prior hysterectomy)	1	326	70	1	NA	NA	326	1	Notassigned	580	NA	5.84369
TCGA-FI-A2EY-01A-12R-A18M-07	TCGA-FI-A2EY-01A	TCGA-FI-A2EY-01	TCGA-FI-A2EY	01A	d718d93b-84ae-4b17-9a3b-5d6e2ee9fda5	NA	Dead	>=60	female	white	Stage III	Serous cystadenocarcinoma, NOS	G3	28.6661	NO	Post (prior bilateral ovariectomy OR >12 mo since LMP with no prior hysterectomy)	1	880	577	1	880	0	880	0	Notassigned	567	NA	7.25955
TCGA-AX-A3GI-01A-11R-A213-07	TCGA-AX-A3GI-01A	TCGA-AX-A3GI-01	TCGA-AX-A3GI	01A	f33c4f00-b105-4e5f-adae-a10fac9547ca	12	Alive	>=60	female	black or african american	Stage III	Serous cystadenocarcinoma, NOS	G3	31.1951	NA	NA	0	12	12	0	NA	NA	12	0	Notassigned	155	NA	7.27842
TCGA-BG-A0MH-01A-11R-A118-07	TCGA-BG-A0MH-01A	TCGA-BG-A0MH-01	TCGA-BG-A0MH	01A	eb483e7a-fe23-4b42-8317-00ae6a590a42	1930	Alive	>=60	female	white	Stage I	Endometrioid adenocarcinoma, NOS	G2	57.3453	NA	Post (prior bilateral ovariectomy OR >12 mo since LMP with no prior hysterectomy)	0	1930	1930	0	1930	0	1930	0	Notassigned	182	NA	6.26334
TCGA-QF-A5YT-01A-11R-A31O-07	TCGA-QF-A5YT-01A	TCGA-QF-A5YT-01	TCGA-QF-A5YT	01A	1d986e93-94bf-41b6-8cae-14d38d1f484e	1215	Alive	<60	female	black or african american	Stage II	Endometrioid adenocarcinoma, NOS	G1	50.519	NO	Post (prior bilateral ovariectomy OR >12 mo since LMP with no prior hysterectomy)	0	1215	1215	0	1215	0	1215	0	Notassigned	556	NA	5.68149
TCGA-DI-A1BY-01A-21R-A137-07	TCGA-DI-A1BY-01A	TCGA-DI-A1BY-01	TCGA-DI-A1BY	01A	7cacddb5-48c3-4174-8674-9c0e74c9b6ad	1114	Alive	>=60	female	white	Stage II	Serous cystadenocarcinoma, NOS	G2	52.0291	YES	NA	0	1114	1114	0	1114	0	1114	0	Notassigned	185	NA	5.83221
TCGA-B5-A0JN-01A-11R-A104-07	TCGA-B5-A0JN-01A	TCGA-B5-A0JN-01	TCGA-B5-A0JN	01A	31deafec-e666-4cc6-8f3a-857a3b6b6ed0	1939	Alive	>=60	female	black or african american	Stage IV	Serous cystadenocarcinoma, NOS	G3	24.4561	NO	Post (prior bilateral ovariectomy OR >12 mo since LMP with no prior hysterectomy)	0	2445	2445	0	NA	NA	2445	0	Notassigned	613	NA	7.00604
TCGA-EY-A1GT-01A-11R-A13S-07	TCGA-EY-A1GT-01A	TCGA-EY-A1GT-01	TCGA-EY-A1GT	01A	035e7dc1-08d6-40da-a550-1d3fc1bfa2e7	490	Alive	>=60	female	white	Stage III	Endometrioid adenocarcinoma, NOS	G1	24.8016	NO	Post (prior bilateral ovariectomy OR >12 mo since LMP with no prior hysterectomy)	0	490	490	0	490	0	490	0	Notassigned	309	NA	5.60924
TCGA-B5-A11U-01A-11R-A118-07	TCGA-B5-A11U-01A	TCGA-B5-A11U-01	TCGA-B5-A11U	01A	d512620a-6a4e-4f8b-88a7-3dbad09b951d	509	Alive	>=60	female	black or african american	Stage IV	Endometrioid adenocarcinoma, NOS	G3	26.4024	YES	Post (prior bilateral ovariectomy OR >12 mo since LMP with no prior hysterectomy)	0	509	509	0	NA	NA	509	0	MSI	95	NA	6.42754
TCGA-A5-A0GE-01A-11R-A16W-07	TCGA-A5-A0GE-01A	TCGA-A5-A0GE-01	TCGA-A5-A0GE	01A	f897b817-b897-4259-a41c-053cd6c2fc60	3205	Alive	<60	female	asian	Stage I	Endometrioid adenocarcinoma, NOS	G2	23.7253	NO	Pre (<6 months since LMP AND no prior bilateral ovariectomy AND not on estrogen replacement)	0	3205	3205	0	3205	0	3205	0	CN low	302	NA	5.56166
TCGA-D1-A17M-01A-21R-A12I-07	TCGA-D1-A17M-01A	TCGA-D1-A17M-01	TCGA-D1-A17M	01A	0084369c-3778-4220-9846-f1193b48e1db	311	Alive	<60	female	white	Stage II	Endometrioid adenocarcinoma, NOS	G1	53.4457	NO	Post (prior bilateral ovariectomy OR >12 mo since LMP with no prior hysterectomy)	0	311	311	0	311	0	311	0	MSI	488	NA	6.67652
TCGA-AX-A1C7-01A-11R-A137-07	TCGA-AX-A1C7-01A	TCGA-AX-A1C7-01	TCGA-AX-A1C7	01A	ea2f3ea8-e62f-4de4-a70d-807fba91874f	1054	Alive	>=60	female	white	Stage I	Serous cystadenocarcinoma, NOS	G3	25.9695	NA	Post (prior bilateral ovariectomy OR >12 mo since LMP with no prior hysterectomy)	0	1054	390	1	NA	NA	1054	0	CN high	447	NA	6.03104
TCGA-D1-A2G6-01A-11R-A17B-07	TCGA-D1-A2G6-01A	TCGA-D1-A2G6-01	TCGA-D1-A2G6	01A	bbc57772-6462-4efb-9bf3-e7af4b4852b4	NA	Dead	<60	female	white	Stage III	Endometrioid adenocarcinoma, NOS	G3	28.3447	NA	Post (prior bilateral ovariectomy OR >12 mo since LMP with no prior hysterectomy)	1	258	258	1	NA	NA	258	1	Notassigned	543	NA	6.54823
TCGA-D1-A17N-01A-11R-A12I-07	TCGA-D1-A17N-01A	TCGA-D1-A17N-01	TCGA-D1-A17N	01A	2109e5d5-43e6-4ca8-bd8c-8f34489437e8	46	Alive	<60	female	not reported	Stage I	Endometrioid adenocarcinoma, NOS	G2	48.6282	NO	Peri (6-12 months since last menstrual period)	0	46	46	0	46	0	46	0	CN low	318	NA	3.76993
TCGA-AP-A3K1-01A-11R-A213-07	TCGA-AP-A3K1-01A	TCGA-AP-A3K1-01	TCGA-AP-A3K1	01A	5762e95b-ab5c-48bc-8708-c374210bb99a	555	Dead	<60	female	white	Stage IV	Serous cystadenocarcinoma, NOS	G3	24.3418	NO	Post (prior bilateral ovariectomy OR >12 mo since LMP with no prior hysterectomy)	1	666	198	1	NA	NA	666	1	Notassigned	357	NA	6.45114
TCGA-EY-A1GQ-01A-21R-A13S-07	TCGA-EY-A1GQ-01A	TCGA-EY-A1GQ-01	TCGA-EY-A1GQ	01A	61521805-104e-45ab-aed9-40c7b6aef216	544	Alive	>=60	female	white	Stage I	Endometrioid adenocarcinoma, NOS	G3	29.7521	NO	Post (prior bilateral ovariectomy OR >12 mo since LMP with no prior hysterectomy)	0	544	334	1	334	1	544	0	Notassigned	412	NA	6.7559
TCGA-AP-A052-01A-11R-A00V-07	TCGA-AP-A052-01A	TCGA-AP-A052-01	TCGA-AP-A052	01A	da001b46-0e88-43b1-a03b-8f315112370e	NA	Dead	<60	female	black or african american	Stage IV	Serous cystadenocarcinoma, NOS	G3	46.281	NO	Post (prior bilateral ovariectomy OR >12 mo since LMP with no prior hysterectomy)	1	669	394	1	NA	NA	669	1	CN high	210	NA	7.433
TCGA-D1-A179-01A-11R-A12I-07	TCGA-D1-A179-01A	TCGA-D1-A179-01	TCGA-D1-A179	01A	69c1ba64-b5f8-4a80-b081-1aa83b273d88	206	Dead	>=60	female	white	Stage III	Serous cystadenocarcinoma, NOS	G3	36.1988	YES	Post (prior bilateral ovariectomy OR >12 mo since LMP with no prior hysterectomy)	1	448	427	1	427	1	448	1	Notassigned	583	NA	9.55659
TCGA-AX-A1CP-01A-11R-A137-07	TCGA-AX-A1CP-01A	TCGA-AX-A1CP-01	TCGA-AX-A1CP	01A	c69e5a23-af0c-48b7-b8f5-3c1075974812	1107	Alive	>=60	female	white	Stage I	Serous cystadenocarcinoma, NOS	G3	22.6003	YES	Post (prior bilateral ovariectomy OR >12 mo since LMP with no prior hysterectomy)	0	1107	722	1	NA	NA	1107	0	CN high	222	NA	6.79728
TCGA-B5-A11Z-01A-11R-A10J-07	TCGA-B5-A11Z-01A	TCGA-B5-A11Z-01	TCGA-B5-A11Z	01A	966a5b1e-7050-4fa6-9a22-0a7b9eb06dee	528	Alive	>=60	female	white	Stage I	Endometrioid adenocarcinoma, NOS	G1	28.3937	NO	Post (prior bilateral ovariectomy OR >12 mo since LMP with no prior hysterectomy)	0	528	528	0	528	0	528	0	CN low	264	NA	6.24057
TCGA-B5-A11S-01A-11R-A118-07	TCGA-B5-A11S-01A	TCGA-B5-A11S-01	TCGA-B5-A11S	01A	8b2404ad-3251-4661-a680-a79227f79fe9	2229	Alive	>=60	female	white	Stage I	Endometrioid adenocarcinoma, NOS	G2	47.8721	NA	Post (prior bilateral ovariectomy OR >12 mo since LMP with no prior hysterectomy)	0	2229	41	1	2229	0	2229	0	CN low	428	NA	6.43585
TCGA-FI-A2F4-01A-11R-A17B-07	TCGA-FI-A2F4-01A	TCGA-FI-A2F4-01	TCGA-FI-A2F4	01A	38b48a78-a757-4def-b7fb-1cdf9ffba379	2230	Alive	>=60	female	black or african american	Stage I	Endometrioid adenocarcinoma, NOS	G3	27.1809	NA	Post (prior bilateral ovariectomy OR >12 mo since LMP with no prior hysterectomy)	0	2230	2230	0	2230	0	2230	0	Notassigned	173	NA	5.16262
TCGA-AJ-A3OK-01A-12R-A22K-07	TCGA-AJ-A3OK-01A	TCGA-AJ-A3OK-01	TCGA-AJ-A3OK	01A	36bbd5d9-b082-4cb7-9a72-2dbf857cd5f0	485	Alive	>=60	female	white	Stage I	Serous cystadenocarcinoma, NOS	G3	29.2969	NA	Post (prior bilateral ovariectomy OR >12 mo since LMP with no prior hysterectomy)	0	485	485	0	485	0	485	0	Notassigned	460	NA	6.17607
TCGA-BG-A0M6-01A-31R-A104-07	TCGA-BG-A0M6-01A	TCGA-BG-A0M6-01	TCGA-BG-A0M6	01A	3b0707ac-1ec6-4222-94b0-3f743e127ca6	241	Dead	>=60	female	white	Stage III	Serous cystadenocarcinoma, NOS	G3	23.8054	NO	Post (prior bilateral ovariectomy OR >12 mo since LMP with no prior hysterectomy)	1	671	671	0	671	0	671	0	CN high	496	NA	7.00315
TCGA-AJ-A2QL-01A-11R-A18M-07	TCGA-AJ-A2QL-01A	TCGA-AJ-A2QL-01	TCGA-AJ-A2QL	01A	3ee8fe71-e80d-47ba-8c22-3ad14d6f896e	602	Alive	>=60	female	white	Stage III	Endometrioid adenocarcinoma, NOS	G3	42.1544	YES	Post (prior bilateral ovariectomy OR >12 mo since LMP with no prior hysterectomy)	0	602	602	0	602	0	602	0	Notassigned	644	NA	4.31194
TCGA-D1-A16B-01A-11R-A12I-07	TCGA-D1-A16B-01A	TCGA-D1-A16B-01	TCGA-D1-A16B	01A	665ce266-2e04-4dbd-a714-90425aaa3a25	1106	Alive	>=60	female	white	Stage I	Endometrioid adenocarcinoma, NOS	G2	34.0176	NO	Post (prior bilateral ovariectomy OR >12 mo since LMP with no prior hysterectomy)	0	1106	1106	0	1106	0	1106	0	CN low	639	NA	5.81758
TCGA-AX-A3G1-01A-11R-A22K-07	TCGA-AX-A3G1-01A	TCGA-AX-A3G1-01	TCGA-AX-A3G1	01A	7bb50c4c-9d31-4cbf-bf0d-c0f1194b3bdf	NA	Dead	>=60	female	white	Stage I	Endometrioid adenocarcinoma, NOS	G3	23.8281	NA	Post (prior bilateral ovariectomy OR >12 mo since LMP with no prior hysterectomy)	1	624	624	0	NA	NA	624	NA	Notassigned	424	NA	6.92877
TCGA-A5-A0GV-01A-31R-A16W-07	TCGA-A5-A0GV-01A	TCGA-A5-A0GV-01	TCGA-A5-A0GV	01A	7cca1b38-779e-4cef-b0ab-4bc45994f4df	1643	Alive	>=60	female	white	Stage I	Endometrioid adenocarcinoma, NOS	G1	25.2363	NO	Post (prior bilateral ovariectomy OR >12 mo since LMP with no prior hysterectomy)	0	1643	304	1	304	1	1643	0	CN low	387	NA	5.80801
TCGA-BG-A221-01A-21R-A157-07	TCGA-BG-A221-01A	TCGA-BG-A221-01	TCGA-BG-A221	01A	2ee1195e-4b7b-474c-97ad-9d339214d08f	55	Alive	>=60	female	white	Stage I	Endometrioid adenocarcinoma, NOS	G3	25.1532	NO	Post (prior bilateral ovariectomy OR >12 mo since LMP with no prior hysterectomy)	0	55	55	0	55	0	55	0	Notassigned	249	NA	6.16302
TCGA-EY-A4KR-01A-11R-A27V-07	TCGA-EY-A4KR-01A	TCGA-EY-A4KR-01	TCGA-EY-A4KR	01A	775b0ee7-6bf8-4ee1-9061-0efd7393d49a	196	Dead	<60	female	black or african american	Stage III	Serous cystadenocarcinoma, NOS	G3	42.3855	NA	Post (prior bilateral ovariectomy OR >12 mo since LMP with no prior hysterectomy)	1	346	346	1	NA	NA	346	1	Notassigned	400	NA	6.20765
TCGA-AP-A5FX-01A-11R-A27V-07	TCGA-AP-A5FX-01A	TCGA-AP-A5FX-01	TCGA-AP-A5FX	01A	f8c97003-66ad-4bd5-a85c-20a5fd918124	1026	Dead	>=60	female	black or african american	Stage III	Serous cystadenocarcinoma, NOS	G3	28.3447	NA	Post (prior bilateral ovariectomy OR >12 mo since LMP with no prior hysterectomy)	1	1099	407	1	407	1	1099	1	Notassigned	566	NA	6.35914
TCGA-AP-A0LD-01A-11R-A040-07	TCGA-AP-A0LD-01A	TCGA-AP-A0LD-01	TCGA-AP-A0LD	01A	c8e98775-a1b4-4e5a-9689-c7d585ec25c3	3589	Alive	>=60	female	white	Stage I	Endometrioid adenocarcinoma, NOS	G3	27.2392	NA	Post (prior bilateral ovariectomy OR >12 mo since LMP with no prior hysterectomy)	0	3589	3589	0	3589	0	3589	0	MSI	469	NA	4.11584
TCGA-DF-A2KR-01A-11R-A180-07	TCGA-DF-A2KR-01A	TCGA-DF-A2KR-01	TCGA-DF-A2KR	01A	584d7e61-e2a6-417a-b1e7-bd48fada04fd	1865	Alive	>=60	female	not reported	Stage III	Endometrioid adenocarcinoma, NOS	G3	NA	NO	Post (prior bilateral ovariectomy OR >12 mo since LMP with no prior hysterectomy)	0	2178	2113	1	2178	0	2178	0	Notassigned	443	NA	7.46686
TCGA-A5-A2K4-01A-11R-A18M-07	TCGA-A5-A2K4-01A	TCGA-A5-A2K4-01	TCGA-A5-A2K4	01A	7c1b20f4-2314-4523-9471-6a9f8c7aee0d	NA	Dead	>=60	female	white	Stage III	Serous cystadenocarcinoma, NOS	G3	18.0697	NO	Post (prior bilateral ovariectomy OR >12 mo since LMP with no prior hysterectomy)	1	871	528	1	528	1	871	1	Notassigned	360	NA	7.23333
TCGA-BG-A18C-01A-11R-A12I-07	TCGA-BG-A18C-01A	TCGA-BG-A18C-01	TCGA-BG-A18C	01A	0861ee92-a3c8-4ab1-ac17-1e89b85284ee	470	Alive	>=60	female	white	Stage I	Endometrioid adenocarcinoma, NOS	G2	36.1323	YES	NA	0	470	470	0	470	0	470	0	CN high	320	NA	6.52231
TCGA-BS-A0UT-01A-11R-A104-07	TCGA-BS-A0UT-01A	TCGA-BS-A0UT-01	TCGA-BS-A0UT	01A	6095f562-35b1-46e4-b3db-2ab498c16f16	2212	Alive	>=60	female	asian	Stage II	Endometrioid adenocarcinoma, NOS	G2	28.1337	NO	Post (prior bilateral ovariectomy OR >12 mo since LMP with no prior hysterectomy)	0	2212	2212	0	2212	0	2212	0	CN low	341	NA	6.2786
TCGA-D1-A17L-01A-11R-A12I-07	TCGA-D1-A17L-01A	TCGA-D1-A17L-01	TCGA-D1-A17L	01A	34617c0d-8d37-40de-a208-660a73cfc4cb	802	Alive	>=60	female	white	Stage I	Endometrioid adenocarcinoma, NOS	G1	41.5765	NO	Post (prior bilateral ovariectomy OR >12 mo since LMP with no prior hysterectomy)	0	802	802	0	802	0	802	0	CN low	186	NA	5.17275
TCGA-AX-A3G9-01A-11R-A22K-07	TCGA-AX-A3G9-01A	TCGA-AX-A3G9-01	TCGA-AX-A3G9	01A	f2c86905-31e6-47d9-984c-b83c6cb696e7	558	Alive	>=60	female	white	Stage III	Endometrioid adenocarcinoma, NOS	G3	25.2994	NA	NA	0	558	558	0	NA	NA	558	0	Notassigned	596	NA	7.06284
TCGA-AP-A0L9-01A-11R-A040-07	TCGA-AP-A0L9-01A	TCGA-AP-A0L9-01	TCGA-AP-A0L9	01A	62eeead9-c93d-4dba-a2f4-586a13ad4ea7	3815	Alive	>=60	female	white	Stage I	Serous cystadenocarcinoma, NOS	G3	25.9695	NA	Post (prior bilateral ovariectomy OR >12 mo since LMP with no prior hysterectomy)	0	3815	3815	0	3815	0	3815	0	CN high	334	NA	7.09269
TCGA-A5-A0RA-01A-21R-A104-07	TCGA-A5-A0RA-01A	TCGA-A5-A0RA-01	TCGA-A5-A0RA	01A	cfb8e34b-3927-45ab-92aa-d698d9642cad	884	Alive	>=60	female	white	Stage I	Endometrioid adenocarcinoma, NOS	G2	47.0343	NO	Post (prior bilateral ovariectomy OR >12 mo since LMP with no prior hysterectomy)	0	884	884	0	884	0	884	0	CN low	578	NA	6.25758
TCGA-A5-A2K7-01A-11R-A180-07	TCGA-A5-A2K7-01A	TCGA-A5-A2K7-01	TCGA-A5-A2K7	01A	2be1e943-4726-4438-8b1e-29e40c3ad82d	1063	Alive	<60	female	not reported	Stage II	Endometrioid adenocarcinoma, NOS	G3	29.2101	YES	Pre (<6 months since LMP AND no prior bilateral ovariectomy AND not on estrogen replacement)	0	1063	1063	0	1063	0	1063	0	Notassigned	105	NA	5.58916
TCGA-EY-A1GF-01A-11R-A13S-07	TCGA-EY-A1GF-01A	TCGA-EY-A1GF-01	TCGA-EY-A1GF	01A	437a7292-1c08-4f71-b59b-2749a08af81e	826	Alive	>=60	female	black or african american	Stage I	Endometrioid adenocarcinoma, NOS	G2	26.079	NO	Post (prior bilateral ovariectomy OR >12 mo since LMP with no prior hysterectomy)	0	826	826	0	826	0	826	0	Notassigned	437	NA	7.29496
TCGA-K6-A3WQ-01A-11R-A22K-07	TCGA-K6-A3WQ-01A	TCGA-K6-A3WQ-01	TCGA-K6-A3WQ	01A	2672526a-2900-49fa-98e2-b244cba046a8	400	Dead	>=60	female	white	Stage IV	Serous cystadenocarcinoma, NOS	G3	33.8566	YES	Post (prior bilateral ovariectomy OR >12 mo since LMP with no prior hysterectomy)	1	427	351	1	NA	NA	427	1	Notassigned	167	NA	7.65043
TCGA-D1-A0ZO-01A-11R-A118-07	TCGA-D1-A0ZO-01A	TCGA-D1-A0ZO-01	TCGA-D1-A0ZO	01A	58966ed8-3591-4c18-8dbe-0cf5bb5f75a9	602	Alive	>=60	female	white	Stage I	Endometrioid adenocarcinoma, NOS	G1	40.404	NO	Post (prior bilateral ovariectomy OR >12 mo since LMP with no prior hysterectomy)	0	602	602	0	602	0	602	0	MSI	429	NA	6.14365
TCGA-BK-A13C-01A-11R-A118-07	TCGA-BK-A13C-01A	TCGA-BK-A13C-01	TCGA-BK-A13C	01A	2276c28c-bc2c-4b46-a3bc-8e0bfd230435	760	Alive	<60	female	black or african american	Stage I	Endometrioid adenocarcinoma, NOS	G2	33.7495	NO	Peri (6-12 months since last menstrual period)	0	760	760	0	760	0	760	0	CN low	537	NA	7.14153
TCGA-EC-A1QX-01A-31R-A16F-07	TCGA-EC-A1QX-01A	TCGA-EC-A1QX-01	TCGA-EC-A1QX	01A	b1c573a4-6b8b-4d5f-9c9d-fe87d723cbb3	224	Alive	>=60	female	white	Stage I	Endometrioid adenocarcinoma, NOS	G3	34.7209	NA	Post (prior bilateral ovariectomy OR >12 mo since LMP with no prior hysterectomy)	0	224	219	1	NA	NA	224	0	Notassigned	609	NA	6.68117
TCGA-DF-A2KY-01A-21R-A213-07	TCGA-DF-A2KY-01A	TCGA-DF-A2KY-01	TCGA-DF-A2KY	01A	08b1942b-5abc-4e06-8ca7-ef62cf7209e3	332	Alive	<60	female	not reported	Stage IV	Endometrioid adenocarcinoma, NOS	G3	NA	NA	Pre (<6 months since LMP AND no prior bilateral ovariectomy AND not on estrogen replacement)	0	332	332	0	NA	NA	332	0	Notassigned	62	NA	5.28229
TCGA-B5-A0K6-01A-11R-A040-07	TCGA-B5-A0K6-01A	TCGA-B5-A0K6-01	TCGA-B5-A0K6	01A	042bb5d0-32af-4905-a09f-6baa2133ac78	1953	Alive	<60	female	white	Stage I	Endometrioid adenocarcinoma, NOS	G1	47.3305	YES	Post (prior bilateral ovariectomy OR >12 mo since LMP with no prior hysterectomy)	0	1953	1953	0	1953	0	1953	0	MSI	448	NA	5.26194
TCGA-AX-A1CC-01A-11R-A137-07	TCGA-AX-A1CC-01A	TCGA-AX-A1CC-01	TCGA-AX-A1CC	01A	521eafe4-01bf-4aa8-ae7e-0587e2fb99fd	788	Alive	>=60	female	white	Stage I	Serous cystadenocarcinoma, NOS	G3	40.6805	NA	Post (prior bilateral ovariectomy OR >12 mo since LMP with no prior hysterectomy)	0	788	788	0	NA	NA	788	0	Notassigned	170	NA	6.08625
TCGA-AX-A05Y-01A-11R-A00V-07	TCGA-AX-A05Y-01A	TCGA-AX-A05Y-01	TCGA-AX-A05Y	01A	1eb99d39-5b01-47df-b83b-6c4fc1328dd5	2684	Alive	<60	female	white	Stage I	Endometrioid adenocarcinoma, NOS	G1	33.3866	NA	Post (prior bilateral ovariectomy OR >12 mo since LMP with no prior hysterectomy)	0	2684	194	1	194	1	2684	0	MSI	111	NA	6.3303
TCGA-AX-A2HK-01A-11R-A17B-07	TCGA-AX-A2HK-01A	TCGA-AX-A2HK-01	TCGA-AX-A2HK	01A	18a7b399-dbb9-46ba-8fcb-9ca06a80cd36	NA	Dead	>=60	female	white	Stage III	Endometrioid adenocarcinoma, NOS	G3	30.7809	NA	Post (prior bilateral ovariectomy OR >12 mo since LMP with no prior hysterectomy)	1	90	90	1	NA	NA	90	1	Notassigned	513	NA	7.30526
TCGA-D1-A16X-01A-11R-A12I-07	TCGA-D1-A16X-01A	TCGA-D1-A16X-01	TCGA-D1-A16X	01A	3072eff6-2b2a-4a85-a9f9-8d7e122a200f	111	Alive	<60	female	white	Stage I	Endometrioid adenocarcinoma, NOS	G2	39.4531	NO	Post (prior bilateral ovariectomy OR >12 mo since LMP with no prior hysterectomy)	0	111	111	0	111	0	111	0	POLE	576	NA	5.30923
TCGA-AP-A053-01A-21R-A00V-07	TCGA-AP-A053-01A	TCGA-AP-A053-01	TCGA-AP-A053	01A	eb548f5b-1bfe-4306-9fee-3491aa7f6d42	0	Dead	>=60	female	white	Stage I	Endometrioid adenocarcinoma, NOS	G3	19.7239	NA	Post (prior bilateral ovariectomy OR >12 mo since LMP with no prior hysterectomy)	1	3365	3365	0	3365	0	3365	0	CN high	267	NA	7.39391
TCGA-AP-A0LF-01A-11R-A118-07	TCGA-AP-A0LF-01A	TCGA-AP-A0LF-01	TCGA-AP-A0LF	01A	01b3e7a0-9d1e-4072-a5c1-43c2f79764b6	2845	Alive	>=60	female	white	Stage IV	Endometrioid adenocarcinoma, NOS	G3	27.7767	NA	Post (prior bilateral ovariectomy OR >12 mo since LMP with no prior hysterectomy)	0	2859	2859	0	NA	NA	2859	0	CN high	244	NA	6.56106
TCGA-AX-A2IN-01A-12R-A180-07	TCGA-AX-A2IN-01A	TCGA-AX-A2IN-01	TCGA-AX-A2IN	01A	167b15d4-cb5c-44d0-a04a-e4e9576d1be3	NA	Dead	>=60	female	white	Stage I	Endometrioid adenocarcinoma, NOS	G3	40.5696	NA	Post (prior bilateral ovariectomy OR >12 mo since LMP with no prior hysterectomy)	1	947	257	1	NA	NA	947	1	Notassigned	122	NA	6.06208
TCGA-EO-A1Y8-01A-11R-A157-07	TCGA-EO-A1Y8-01A	TCGA-EO-A1Y8-01	TCGA-EO-A1Y8	01A	936d2922-290b-4b12-b67d-42b4466939a4	901	Alive	>=60	female	not reported	Stage I	Serous cystadenocarcinoma, NOS	G3	27.2096	NO	Post (prior bilateral ovariectomy OR >12 mo since LMP with no prior hysterectomy)	0	1147	1147	0	1147	0	1147	0	CN high	350	NA	6.77396
TCGA-A5-A0GW-01A-11R-A16W-07	TCGA-A5-A0GW-01A	TCGA-A5-A0GW-01	TCGA-A5-A0GW	01A	e7766ea7-e3c8-4bcb-ac94-1811088a0aea	706	Alive	<60	female	asian	Stage I	Endometrioid adenocarcinoma, NOS	G3	24.3007	YES	Post (prior bilateral ovariectomy OR >12 mo since LMP with no prior hysterectomy)	0	706	706	0	706	0	706	0	MSI	413	NA	5.80135
TCGA-AX-A3G3-01A-11R-A213-07	TCGA-AX-A3G3-01A	TCGA-AX-A3G3-01	TCGA-AX-A3G3	01A	468bbe56-015a-45c9-9d2b-f47a0151c9c8	42	Alive	<60	female	white	Stage III	Serous cystadenocarcinoma, NOS	G3	19.721	NA	Post (prior bilateral ovariectomy OR >12 mo since LMP with no prior hysterectomy)	0	42	42	0	NA	NA	42	0	Notassigned	260	NA	5.22652
TCGA-EO-A3AS-01A-11R-A19W-07	TCGA-EO-A3AS-01A	TCGA-EO-A3AS-01	TCGA-EO-A3AS	01A	a4332ff0-9696-4327-8b18-d956b9b5cade	1046	Alive	>=60	female	not reported	Stage I	Endometrioid adenocarcinoma, NOS	G3	26.8407	NO	Post (prior bilateral ovariectomy OR >12 mo since LMP with no prior hysterectomy)	0	1046	1046	0	1046	0	1046	0	Notassigned	301	NA	8.36196
TCGA-D1-A17S-01A-11R-A12I-07	TCGA-D1-A17S-01A	TCGA-D1-A17S-01	TCGA-D1-A17S	01A	35b681b7-178f-4057-be97-096cf9b8d1ab	739	Alive	<60	female	white	Stage I	Endometrioid adenocarcinoma, NOS	G1	42.5781	NO	Post (prior bilateral ovariectomy OR >12 mo since LMP with no prior hysterectomy)	0	739	739	0	739	0	739	0	CN low	426	NA	5.52977
TCGA-EY-A54A-01A-11R-A27V-07	TCGA-EY-A54A-01A	TCGA-EY-A54A-01	TCGA-EY-A54A	01A	43ebdec7-cdde-4b82-bdda-8339378b794d	447	Alive	>=60	female	black or african american	Stage III	Endometrioid adenocarcinoma, NOS	G3	27.0051	NA	Post (prior bilateral ovariectomy OR >12 mo since LMP with no prior hysterectomy)	0	447	447	0	447	0	447	0	Notassigned	220	NA	5.93395
TCGA-EY-A1G7-01A-11R-A13S-07	TCGA-EY-A1G7-01A	TCGA-EY-A1G7-01	TCGA-EY-A1G7	01A	9bee04ab-cf4d-4191-85c5-d413d3e4c05d	NA	Dead	>=60	female	white	Stage II	Endometrioid adenocarcinoma, NOS	G2	37.2791	NO	Post (prior bilateral ovariectomy OR >12 mo since LMP with no prior hysterectomy)	1	189	95	1	95	1	189	1	Notassigned	75	NA	5.62247
TCGA-D1-A17K-01A-11R-A12I-07	TCGA-D1-A17K-01A	TCGA-D1-A17K-01	TCGA-D1-A17K	01A	cb5a1aac-6103-47b4-bfdf-b73ce075edbf	854	Alive	>=60	female	white	Stage I	Endometrioid adenocarcinoma, NOS	G2	37.4214	NO	Post (prior bilateral ovariectomy OR >12 mo since LMP with no prior hysterectomy)	0	854	815	1	815	1	854	0	CN high	470	NA	6.89869
TCGA-A5-A2K3-01A-11R-A32Y-07	TCGA-A5-A2K3-01A	TCGA-A5-A2K3-01	TCGA-A5-A2K3	01A	4058da17-e1bc-421d-aed0-e274a1de309a	2012	Alive	>=60	female	white	Stage I	Serous cystadenocarcinoma, NOS	G3	31.25	NO	Post (prior bilateral ovariectomy OR >12 mo since LMP with no prior hysterectomy)	0	2012	2012	0	2012	0	2012	0	Notassigned	525	NA	5.17532
TCGA-EO-A3KU-01A-11R-A22K-07	TCGA-EO-A3KU-01A	TCGA-EO-A3KU-01	TCGA-EO-A3KU	01A	226ea4c8-457a-4db4-a48a-473d3323842f	677	Alive	>=60	female	not reported	Stage II	Serous cystadenocarcinoma, NOS	G3	24.4646	NO	Post (prior bilateral ovariectomy OR >12 mo since LMP with no prior hysterectomy)	0	677	677	0	677	0	677	0	Notassigned	635	NA	7.33642
TCGA-AP-A0L8-01A-11R-A040-07	TCGA-AP-A0L8-01A	TCGA-AP-A0L8-01	TCGA-AP-A0L8	01A	b4094962-d358-49c7-85d9-a3d1cfab2214	NA	Dead	>=60	female	black or african american	Stage III	Serous cystadenocarcinoma, NOS	G3	NA	NO	Post (prior bilateral ovariectomy OR >12 mo since LMP with no prior hysterectomy)	1	1484	1453	1	1453	1	1484	1	CN high	296	NA	8.05469
TCGA-DI-A0WH-01A-12R-A12I-07	TCGA-DI-A0WH-01A	TCGA-DI-A0WH-01	TCGA-DI-A0WH	01A	2a574561-0470-489d-9f5d-178dd4da74c5	496	Alive	>=60	female	white	Stage I	Endometrioid adenocarcinoma, NOS	G3	35.7513	YES	NA	0	496	496	0	496	0	496	0	MSI	151	NA	5.07296
TCGA-A5-A0VP-01A-21R-A104-07	TCGA-A5-A0VP-01A	TCGA-A5-A0VP-01	TCGA-A5-A0VP	01A	e4486f5c-8843-467f-bd99-ff0aa8126d6e	1288	Alive	>=60	female	white	Stage I	Endometrioid adenocarcinoma, NOS	G3	21.83	NO	Post (prior bilateral ovariectomy OR >12 mo since LMP with no prior hysterectomy)	0	1288	1288	0	1288	0	1288	0	MSI	359	NA	6.48044
TCGA-A5-A0GX-01A-11R-A040-07	TCGA-A5-A0GX-01A	TCGA-A5-A0GX-01	TCGA-A5-A0GX	01A	01d0e31b-3978-4208-b963-bbaffe938aa7	2088	Alive	<60	female	white	Stage I	Endometrioid adenocarcinoma, NOS	G2	40.1547	NO	Post (prior bilateral ovariectomy OR >12 mo since LMP with no prior hysterectomy)	0	2088	2088	0	2088	0	2088	0	CN low	505	NA	5.47309
TCGA-B5-A1MR-01A-31R-A14D-07	TCGA-B5-A1MR-01A	TCGA-B5-A1MR-01	TCGA-B5-A1MR	01A	f2f8e7bc-0133-4a21-bf58-10cb27b39755	6859	Alive	>=60	female	white	Stage III	Endometrioid adenocarcinoma, NOS	G3	NA	NO	Post (prior bilateral ovariectomy OR >12 mo since LMP with no prior hysterectomy)	0	6859	6859	0	6859	0	6859	0	Notassigned	159	NA	5.97044
TCGA-BG-A0MO-01A-11R-A040-07	TCGA-BG-A0MO-01A	TCGA-BG-A0MO-01	TCGA-BG-A0MO	01A	8e0dceff-a192-4a03-967d-1aff965ca4d2	1309	Alive	>=60	female	white	Stage I	Endometrioid adenocarcinoma, NOS	G1	32.4219	NO	Post (prior bilateral ovariectomy OR >12 mo since LMP with no prior hysterectomy)	0	1309	1309	0	1309	0	1309	0	CN low	356	NA	7.02792
TCGA-2E-A9G8-01A-11R-A40A-07	TCGA-2E-A9G8-01A	TCGA-2E-A9G8-01	TCGA-2E-A9G8	01A	ccdb4cdf-6e04-4251-9882-9f85cd7495dd	1249	Alive	<60	female	black or african american	Stage III	Endometrioid adenocarcinoma, NOS	G2	28.8044	NO	Post (prior bilateral ovariectomy OR >12 mo since LMP with no prior hysterectomy)	0	1249	335	1	NA	NA	1249	0	Notassigned	365	NA	7.3399
TCGA-A5-A0VQ-01A-11R-A104-07	TCGA-A5-A0VQ-01A	TCGA-A5-A0VQ-01	TCGA-A5-A0VQ	01A	eb908245-e14f-442f-a9ce-85e66c169d73	485	Alive	>=60	female	not reported	Stage I	Endometrioid adenocarcinoma, NOS	G3	35.6513	NO	Post (prior bilateral ovariectomy OR >12 mo since LMP with no prior hysterectomy)	0	485	485	0	485	0	485	0	MSI	223	NA	5.72777
TCGA-D1-A177-01A-21R-A12I-07	TCGA-D1-A177-01A	TCGA-D1-A177-01	TCGA-D1-A177	01A	083227fd-5547-4b9b-a62d-8d78c529618c	548	Alive	>=60	female	white	Stage I	Endometrioid adenocarcinoma, NOS	G2	22.9398	NO	Post (prior bilateral ovariectomy OR >12 mo since LMP with no prior hysterectomy)	0	548	347	1	347	1	548	0	MSI	104	NA	4.63807
TCGA-AP-A0LO-01A-11R-A040-07	TCGA-AP-A0LO-01A	TCGA-AP-A0LO-01	TCGA-AP-A0LO	01A	85eafb47-339e-4fe2-b46a-757c894bf599	NA	Dead	<60	female	white	Stage I	Endometrioid adenocarcinoma, NOS	G2	26.1719	YES	Pre (<6 months since LMP AND no prior bilateral ovariectomy AND not on estrogen replacement)	1	1016	516	1	516	1	1016	1	CN low	114	NA	6.72901
TCGA-E6-A2P9-01A-11R-A19W-07	TCGA-E6-A2P9-01A	TCGA-E6-A2P9-01	TCGA-E6-A2P9	01A	90b2eecc-f3ee-4ad1-b89e-74691079b20e	1386	Alive	>=60	female	white	Stage I	Endometrioid adenocarcinoma, NOS	G3	41.7655	NO	Post (prior bilateral ovariectomy OR >12 mo since LMP with no prior hysterectomy)	0	1386	1386	0	1386	0	1386	0	Notassigned	557	NA	6.69775
TCGA-EY-A1GM-01A-12R-A14D-07	TCGA-EY-A1GM-01A	TCGA-EY-A1GM-01	TCGA-EY-A1GM	01A	23a10977-df02-4d0c-8619-ec72734a688e	210	Dead	>=60	female	black or african american	Stage III	Serous cystadenocarcinoma, NOS	G3	28.8044	NA	Post (prior bilateral ovariectomy OR >12 mo since LMP with no prior hysterectomy)	1	995	791	1	791	1	995	1	Notassigned	265	NA	6.08872
TCGA-EY-A1GS-01A-11R-A13S-07	TCGA-EY-A1GS-01A	TCGA-EY-A1GS-01	TCGA-EY-A1GS	01A	6e767c5a-d5a2-4052-99e2-163c0f5f106b	459	Dead	>=60	female	black or african american	Stage IV	Serous cystadenocarcinoma, NOS	G3	23.9188	NA	Post (prior bilateral ovariectomy OR >12 mo since LMP with no prior hysterectomy)	1	670	670	1	NA	NA	670	1	CN high	436	NA	4.57395
TCGA-BS-A0V7-01A-21R-A118-07	TCGA-BS-A0V7-01A	TCGA-BS-A0V7-01	TCGA-BS-A0V7	01A	70fd4ee9-d29b-43f6-a434-149b7a65197f	1934	Alive	<60	female	native hawaiian or other pacific islander	Stage I	Endometrioid adenocarcinoma, NOS	G1	35.2941	YES	Pre (<6 months since LMP AND no prior bilateral ovariectomy AND not on estrogen replacement)	0	1934	1934	0	1934	0	1934	0	Notassigned	82	NA	3.53963
TCGA-A5-A1OJ-01A-11R-A14D-07	TCGA-A5-A1OJ-01A	TCGA-A5-A1OJ-01	TCGA-A5-A1OJ	01A	f130c71b-1629-4674-92a0-c767dfb4eeee	1006	Alive	<60	female	asian	Stage I	Endometrioid adenocarcinoma, NOS	G2	39.1259	NO	Pre (<6 months since LMP AND no prior bilateral ovariectomy AND not on estrogen replacement)	0	1006	1006	0	1006	0	1006	0	Notassigned	143	NA	6.84042
TCGA-AJ-A23O-01A-11R-A157-07	TCGA-AJ-A23O-01A	TCGA-AJ-A23O-01	TCGA-AJ-A23O	01A	9c5e10db-2868-4af7-bed7-3fd2a079b9b8	60	Dead	>=60	female	white	Stage I	Endometrioid adenocarcinoma, NOS	G3	24.3418	NO	Post (prior bilateral ovariectomy OR >12 mo since LMP with no prior hysterectomy)	1	312	312	0	NA	NA	312	0	Notassigned	553	NA	5.02391
TCGA-EY-A1GO-01A-11R-A14D-07	TCGA-EY-A1GO-01A	TCGA-EY-A1GO-01	TCGA-EY-A1GO	01A	b8a15bab-7f54-48ef-9a53-6c6440320e69	586	Alive	>=60	female	white	Stage III	Endometrioid adenocarcinoma, NOS	G2	31.2295	NO	Post (prior bilateral ovariectomy OR >12 mo since LMP with no prior hysterectomy)	0	586	517	1	517	1	586	0	Notassigned	528	NA	4.82008
TCGA-AX-A3G4-01A-11R-A213-07	TCGA-AX-A3G4-01A	TCGA-AX-A3G4-01	TCGA-AX-A3G4	01A	6c3a4e3b-869d-4c0d-af52-932a177dd60e	9	Alive	>=60	female	native hawaiian or other pacific islander	Stage III	Serous cystadenocarcinoma, NOS	G3	38.3664	NA	Post (prior bilateral ovariectomy OR >12 mo since LMP with no prior hysterectomy)	0	9	9	0	NA	NA	9	0	Notassigned	554	NA	6.74414
TCGA-B5-A0JX-01A-21R-A14M-07	TCGA-B5-A0JX-01A	TCGA-B5-A0JX-01	TCGA-B5-A0JX	01A	51170677-46ff-4ce7-babf-e5151d1af528	1787	Alive	>=60	female	white	Stage I	Endometrioid adenocarcinoma, NOS	G3	40.0368	NA	Post (prior bilateral ovariectomy OR >12 mo since LMP with no prior hysterectomy)	0	1787	1787	0	1787	0	1787	0	Notassigned	501	NA	5.31507
TCGA-D1-A17B-01A-22R-A12I-07	TCGA-D1-A17B-01A	TCGA-D1-A17B-01	TCGA-D1-A17B	01A	56100ec7-8a17-496d-8617-31b42f45c161	213	Alive	>=60	female	white	Stage I	Endometrioid adenocarcinoma, NOS	G2	41.9143	NO	Post (prior bilateral ovariectomy OR >12 mo since LMP with no prior hysterectomy)	0	213	213	0	213	0	213	0	MSI	165	NA	4.38698
TCGA-AX-A06B-01A-11R-A00V-07	TCGA-AX-A06B-01A	TCGA-AX-A06B-01	TCGA-AX-A06B	01A	9ab8e15f-8382-4e56-af5a-f34c966f8153	2058	Alive	>=60	female	white	Stage II	Endometrioid adenocarcinoma, NOS	G3	40.7877	NA	Post (prior bilateral ovariectomy OR >12 mo since LMP with no prior hysterectomy)	0	2058	2058	0	2058	0	2058	0	CN high	551	NA	7.20355
TCGA-FI-A3PX-01A-11R-A22K-07	TCGA-FI-A3PX-01A	TCGA-FI-A3PX-01	TCGA-FI-A3PX	01A	b48ec0d3-a63b-4f93-b8ca-14875377724a	2384	Alive	<60	female	white	Stage III	Serous cystadenocarcinoma, NOS	G3	31.1419	NA	Post (prior bilateral ovariectomy OR >12 mo since LMP with no prior hysterectomy)	0	2384	2384	0	2384	0	2384	0	Notassigned	128	NA	7.66265
TCGA-D1-A0ZN-01A-11R-A118-07	TCGA-D1-A0ZN-01A	TCGA-D1-A0ZN-01	TCGA-D1-A0ZN	01A	6399dc78-5784-490f-a20d-998554980012	512	Alive	>=60	female	white	Stage I	Endometrioid adenocarcinoma, NOS	G1	29.0533	NO	Peri (6-12 months since last menstrual period)	0	512	448	1	512	0	512	0	CN low	153	NA	7.0586
TCGA-BG-A3EW-01A-11R-A22K-07	TCGA-BG-A3EW-01A	TCGA-BG-A3EW-01	TCGA-BG-A3EW	01A	bd588720-e890-4210-bf17-bc0ad7cf9471	344	Alive	>=60	female	white	Stage III	Endometrioid adenocarcinoma, NOS	G3	45.7251	NA	Post (prior bilateral ovariectomy OR >12 mo since LMP with no prior hysterectomy)	0	344	344	0	344	0	344	0	Notassigned	120	NA	6.90701
TCGA-KJ-A3U4-01A-11R-A22K-07	TCGA-KJ-A3U4-01A	TCGA-KJ-A3U4-01	TCGA-KJ-A3U4	01A	979bb0f5-7e4e-44c2-8135-14bb3fde1bc6	1095	Alive	<60	female	white	Stage I	Serous cystadenocarcinoma, NOS	G1	35.2617	NO	Post (prior bilateral ovariectomy OR >12 mo since LMP with no prior hysterectomy)	0	1095	306	1	NA	NA	1095	0	Notassigned	611	NA	7.61589
TCGA-AX-A05W-01A-21R-A466-07	TCGA-AX-A05W-01A	TCGA-AX-A05W-01	TCGA-AX-A05W	01A	1e655307-21a7-430a-8f85-a2d5f8b26662	2450	Alive	>=60	female	white	Stage II	Endometrioid adenocarcinoma, NOS	G1	28.5483	NA	Post (prior bilateral ovariectomy OR >12 mo since LMP with no prior hysterectomy)	0	2450	2450	0	2450	0	2450	0	Notassigned	77	NA	6.88688
TCGA-BS-A0V6-01A-11R-A118-07	TCGA-BS-A0V6-01A	TCGA-BS-A0V6-01	TCGA-BS-A0V6	01A	31f02a50-fe5b-4193-b945-96b9fa26ded2	2725	Alive	<60	female	asian	Stage I	Endometrioid adenocarcinoma, NOS	G1	33.6728	NO	Post (prior bilateral ovariectomy OR >12 mo since LMP with no prior hysterectomy)	0	2725	2725	0	2725	0	2725	0	CN low	539	NA	4.97192
TCGA-B5-A11O-01A-11R-A118-07	TCGA-B5-A11O-01A	TCGA-B5-A11O-01	TCGA-B5-A11O	01A	bc0b8c97-4f8e-4916-bebe-267f4b55460f	2609	Alive	>=60	female	white	Stage I	Endometrioid adenocarcinoma, NOS	G1	36.388	YES	Post (prior bilateral ovariectomy OR >12 mo since LMP with no prior hysterectomy)	0	2609	1924	1	2609	0	2609	0	CN low	587	NA	5.181
TCGA-EO-A3L0-01A-11R-A22K-07	TCGA-EO-A3L0-01A	TCGA-EO-A3L0-01	TCGA-EO-A3L0	01A	34bd8571-2333-49bc-a72a-3ec0218c0607	1554	Alive	>=60	female	white	Stage I	Endometrioid adenocarcinoma, NOS	G3	43.5109	NO	Post (prior bilateral ovariectomy OR >12 mo since LMP with no prior hysterectomy)	0	1554	1554	0	1554	0	1554	0	Notassigned	569	NA	6.22997
TCGA-BG-A222-01A-11R-A157-07	TCGA-BG-A222-01A	TCGA-BG-A222-01	TCGA-BG-A222	01A	c84c0a5d-40be-4488-b16a-f17076fbaa51	291	Alive	<60	female	white	Stage I	Endometrioid adenocarcinoma, NOS	G3	47.3305	NO	NA	0	291	291	0	291	0	291	0	Notassigned	116	NA	6.34475
TCGA-QF-A5YS-01A-11R-A31O-07	TCGA-QF-A5YS-01A	TCGA-QF-A5YS-01	TCGA-QF-A5YS	01A	b19c86ab-16ae-41d3-a2cd-34e0b64bb23c	689	Alive	<60	female	black or african american	Stage II	Serous cystadenocarcinoma, NOS	G2	30.1021	NO	Post (prior bilateral ovariectomy OR >12 mo since LMP with no prior hysterectomy)	0	689	689	0	689	0	689	0	Notassigned	559	NA	5.15957
TCGA-DI-A1NN-01A-11R-A16F-07	TCGA-DI-A1NN-01A	TCGA-DI-A1NN-01	TCGA-DI-A1NN	01A	f3c46fae-d18c-46e3-875a-3476c55e44b2	1076	Alive	>=60	female	white	Stage III	Serous cystadenocarcinoma, NOS	G3	23.7228	NO	Post (prior bilateral ovariectomy OR >12 mo since LMP with no prior hysterectomy)	0	1076	1023	1	1023	1	1076	0	CN high	178	NA	5.55065
TCGA-D1-A16D-01A-11R-A12I-07	TCGA-D1-A16D-01A	TCGA-D1-A16D-01	TCGA-D1-A16D	01A	917ab8a9-c11a-484f-8490-42b31f28f785	1141	Alive	<60	female	white	Stage I	Endometrioid adenocarcinoma, NOS	G2	56.1422	YES	Peri (6-12 months since last menstrual period)	0	1141	1141	0	1141	0	1141	0	CN low	230	NA	6.69149
TCGA-AP-A05D-01A-11R-A00V-07	TCGA-AP-A05D-01A	TCGA-AP-A05D-01	TCGA-AP-A05D	01A	55510438-6d21-4309-928f-9f86786312cb	1758	Alive	>=60	female	white	Stage III	Serous cystadenocarcinoma, NOS	G3	37.8072	NA	Post (prior bilateral ovariectomy OR >12 mo since LMP with no prior hysterectomy)	0	1758	1758	0	1758	0	1758	0	CN high	285	NA	5.60365
TCGA-AX-A1C9-01A-11R-A137-07	TCGA-AX-A1C9-01A	TCGA-AX-A1C9-01	TCGA-AX-A1C9	01A	d8ad017c-bf83-42cf-9d46-4f47c8d28a8f	802	Alive	>=60	female	white	Stage I	Endometrioid adenocarcinoma, NOS	G2	31.5963	NA	Post (prior bilateral ovariectomy OR >12 mo since LMP with no prior hysterectomy)	0	802	802	0	NA	NA	802	0	Notassigned	83	NA	6.9901
TCGA-D1-A1O8-01A-11R-A14D-07	TCGA-D1-A1O8-01A	TCGA-D1-A1O8-01	TCGA-D1-A1O8	01A	9316e258-e626-4a41-ab07-85210c5290b8	NA	Dead	>=60	female	white	Stage III	Endometrioid adenocarcinoma, NOS	G3	31.2213	NO	Post (prior bilateral ovariectomy OR >12 mo since LMP with no prior hysterectomy)	1	120	120	0	120	0	120	0	Notassigned	228	NA	4.89989
TCGA-FI-A3PV-01A-11R-A22K-07	TCGA-FI-A3PV-01A	TCGA-FI-A3PV-01	TCGA-FI-A3PV	01A	a6989c7c-dd4d-4716-88b2-0ff42543080d	NA	Dead	>=60	female	black or african american	Stage I	Serous cystadenocarcinoma, NOS	G3	34.6809	NA	Post (prior bilateral ovariectomy OR >12 mo since LMP with no prior hysterectomy)	1	1249	1249	1	NA	NA	1249	1	Notassigned	201	NA	7.36264
TCGA-D1-A0ZP-01A-21R-A10J-07	TCGA-D1-A0ZP-01A	TCGA-D1-A0ZP-01	TCGA-D1-A0ZP	01A	6aa28bec-36c5-4a17-b0c4-c3fc24c4f050	911	Alive	<60	female	white	Stage IV	Serous cystadenocarcinoma, NOS	G3	22.3757	NO	Post (prior bilateral ovariectomy OR >12 mo since LMP with no prior hysterectomy)	0	911	629	1	NA	NA	911	0	CN high	455	NA	7.70501
TCGA-BS-A0UL-01A-11R-A109-07	TCGA-BS-A0UL-01A	TCGA-BS-A0UL-01	TCGA-BS-A0UL	01A	50fc515b-a665-4dc0-b1cb-15cc018f12b4	2481	Alive	<60	female	native hawaiian or other pacific islander	Stage I	Endometrioid adenocarcinoma, NOS	G1	39.4464	YES	Peri (6-12 months since last menstrual period)	0	2481	2481	0	2481	0	2481	0	MSI	391	NA	6.45711
TCGA-D1-A3JP-01A-31R-A22K-07	TCGA-D1-A3JP-01A	TCGA-D1-A3JP-01	TCGA-D1-A3JP	01A	0a3d9bab-7802-4ae9-8ab2-56baa97563d9	515	Alive	>=60	female	white	Stage I	Serous cystadenocarcinoma, NOS	G3	23.3377	NA	Post (prior bilateral ovariectomy OR >12 mo since LMP with no prior hysterectomy)	0	515	515	0	NA	NA	515	0	Notassigned	571	NA	7.15859
TCGA-BG-A0MK-01A-51R-A19W-07	TCGA-BG-A0MK-01A	TCGA-BG-A0MK-01	TCGA-BG-A0MK	01A	b7af276a-b8f5-4a3c-8cbd-121186f11c36	NA	Dead	<60	female	black or african american	Stage II	Endometrioid adenocarcinoma, NOS	G3	NA	NA	Pre (<6 months since LMP AND no prior bilateral ovariectomy AND not on estrogen replacement)	1	1317	1317	1	NA	NA	1317	1	Notassigned	331	NA	3.71552
TCGA-D1-A1NW-01A-11R-A14M-07	TCGA-D1-A1NW-01A	TCGA-D1-A1NW-01	TCGA-D1-A1NW	01A	822150f4-4085-40be-a6c2-610e2a151c28	22	Alive	>=60	female	white	Stage IV	Serous cystadenocarcinoma, NOS	G3	38.2812	NO	Post (prior bilateral ovariectomy OR >12 mo since LMP with no prior hysterectomy)	0	22	22	0	NA	NA	22	0	Notassigned	218	NA	6.65639
TCGA-A5-A0GN-01A-11R-A040-07	TCGA-A5-A0GN-01A	TCGA-A5-A0GN-01	TCGA-A5-A0GN	01A	77c3097b-b711-43d9-9431-e27153899d55	1841	Alive	>=60	female	white	Stage I	Endometrioid adenocarcinoma, NOS	G1	25.2826	NO	Post (prior bilateral ovariectomy OR >12 mo since LMP with no prior hysterectomy)	0	1841	1841	0	1841	0	1841	0	CN high	628	NA	7.01933
TCGA-D1-A101-01A-12R-A10J-07	TCGA-D1-A101-01A	TCGA-D1-A101-01	TCGA-D1-A101	01A	24f595db-d21f-41bf-88c9-0e084fcc97b0	53	Alive	>=60	female	white	Stage I	Endometrioid adenocarcinoma, NOS	G2	36.4444	YES	Post (prior bilateral ovariectomy OR >12 mo since LMP with no prior hysterectomy)	0	53	53	0	53	0	53	0	MSI	564	NA	5.86165
TCGA-BS-A0TC-01A-11R-A104-07	TCGA-BS-A0TC-01A	TCGA-BS-A0TC-01	TCGA-BS-A0TC	01A	a55a5114-d042-45e7-b467-ca4776961287	2602	Alive	>=60	female	asian	Stage I	Endometrioid adenocarcinoma, NOS	G1	31.4684	YES	Post (prior bilateral ovariectomy OR >12 mo since LMP with no prior hysterectomy)	0	2602	2602	0	2602	0	2602	0	POLE	380	NA	5.80104
TCGA-EY-A3QX-01A-11R-A22K-07	TCGA-EY-A3QX-01A	TCGA-EY-A3QX-01	TCGA-EY-A3QX	01A	f3c2f1c2-7ccb-4cde-840c-888c1a062858	421	Dead	>=60	female	white	Stage IV	Serous cystadenocarcinoma, NOS	G3	22.3214	NO	Post (prior bilateral ovariectomy OR >12 mo since LMP with no prior hysterectomy)	1	989	896	1	NA	NA	989	1	Notassigned	534	NA	7.6009
TCGA-BG-A0VV-01A-21R-A118-07	TCGA-BG-A0VV-01A	TCGA-BG-A0VV-01	TCGA-BG-A0VV	01A	ecc7f525-2fd2-4a5d-b7ba-953e1e26d00a	1553	Alive	<60	female	white	Stage I	Endometrioid adenocarcinoma, NOS	G1	56.0128	YES	Pre (<6 months since LMP AND no prior bilateral ovariectomy AND not on estrogen replacement)	0	1553	1553	0	1553	0	1553	0	CN low	368	NA	5.70716
TCGA-FI-A2F9-01A-11R-A17B-07	TCGA-FI-A2F9-01A	TCGA-FI-A2F9-01	TCGA-FI-A2F9	01A	1a42ddf6-1afb-4a06-8a87-19837c3236c4	1803	Alive	>=60	female	white	Stage I	Endometrioid adenocarcinoma, NOS	G3	32.3265	NA	Post (prior bilateral ovariectomy OR >12 mo since LMP with no prior hysterectomy)	0	1803	1803	0	1803	0	1803	0	Notassigned	252	NA	7.06056
TCGA-AP-A1DR-01A-11R-A137-07	TCGA-AP-A1DR-01A	TCGA-AP-A1DR-01	TCGA-AP-A1DR	01A	b0e4c150-579e-4df9-ab6d-35da25c995dc	1495	Alive	<60	female	black or african american	Stage III	Endometrioid adenocarcinoma, NOS	G2	42.5781	YES	Post (prior bilateral ovariectomy OR >12 mo since LMP with no prior hysterectomy)	0	1495	1495	0	1495	0	1495	0	Notassigned	590	NA	6.48632
TCGA-EO-A22T-01A-21R-A18M-07	TCGA-EO-A22T-01A	TCGA-EO-A22T-01	TCGA-EO-A22T	01A	a7ce6542-1cb5-456d-b071-0db4090869c7	2035	Alive	<60	female	asian	Stage II	Endometrioid adenocarcinoma, NOS	G3	22.9398	NO	Post (prior bilateral ovariectomy OR >12 mo since LMP with no prior hysterectomy)	0	2035	2035	0	2035	0	2035	0	Notassigned	480	NA	5.53986
TCGA-AP-A1DM-01A-21R-A137-07	TCGA-AP-A1DM-01A	TCGA-AP-A1DM-01	TCGA-AP-A1DM	01A	434c3a27-af20-4682-85e8-22d3cd435d9d	1700	Alive	>=60	female	white	Stage I	Endometrioid adenocarcinoma, NOS	G1	36.391	NO	Post (prior bilateral ovariectomy OR >12 mo since LMP with no prior hysterectomy)	0	1700	1700	0	1700	0	1700	0	Notassigned	176	NA	6.49509
TCGA-AP-A0LI-01A-11R-A040-07	TCGA-AP-A0LI-01A	TCGA-AP-A0LI-01	TCGA-AP-A0LI	01A	b2f45b71-e522-464c-bb3e-a3f3e17ea86a	2972	Alive	>=60	female	black or african american	Stage III	Serous cystadenocarcinoma, NOS	G3	33.1777	NA	Post (prior bilateral ovariectomy OR >12 mo since LMP with no prior hysterectomy)	0	2972	2972	0	2972	0	2972	0	CN high	74	NA	6.0766
TCGA-EO-A22R-01A-11R-A18M-07	TCGA-EO-A22R-01A	TCGA-EO-A22R-01	TCGA-EO-A22R	01A	e61b4b6e-6426-41a8-a959-99d300d5c531	1878	Alive	<60	female	not reported	Stage I	Endometrioid adenocarcinoma, NOS	G3	31.1791	YES	Post (prior bilateral ovariectomy OR >12 mo since LMP with no prior hysterectomy)	0	1878	1878	0	1878	0	1878	0	Notassigned	86	NA	7.26724
TCGA-D1-A1NY-01A-11R-A16F-07	TCGA-D1-A1NY-01A	TCGA-D1-A1NY-01	TCGA-D1-A1NY	01A	cba6ef52-dcf8-4b0d-b858-ac0e0ee76bfe	513	Alive	>=60	female	white	Stage I	Endometrioid adenocarcinoma, NOS	G3	34.3679	NO	Post (prior bilateral ovariectomy OR >12 mo since LMP with no prior hysterectomy)	0	513	513	0	513	0	513	0	Notassigned	123	NA	6.53274
TCGA-AX-A3FT-01A-11R-A22K-07	TCGA-AX-A3FT-01A	TCGA-AX-A3FT-01	TCGA-AX-A3FT	01A	80aedc57-c277-4633-9b3f-ef64be5a18b2	6	Alive	>=60	female	white	Stage I	Endometrioid adenocarcinoma, NOS	G3	31.6346	NA	Post (prior bilateral ovariectomy OR >12 mo since LMP with no prior hysterectomy)	0	6	6	0	NA	NA	6	0	Notassigned	295	NA	6.09971
TCGA-AX-A3G6-01A-11R-A213-07	TCGA-AX-A3G6-01A	TCGA-AX-A3G6-01	TCGA-AX-A3G6	01A	368effd8-38b4-48f8-8405-642bc28900b6	8	Alive	>=60	female	white	Stage I	Serous cystadenocarcinoma, NOS	G2	21.5139	NA	NA	0	8	8	0	NA	NA	8	0	Notassigned	592	NA	6.79718
TCGA-E6-A1LZ-01A-11R-A144-07	TCGA-E6-A1LZ-01A	TCGA-E6-A1LZ-01	TCGA-E6-A1LZ	01A	28280645-b34f-4b0e-8551-4f747f77f299	2406	Alive	>=60	female	black or african american	Stage I	Serous cystadenocarcinoma, NOS	G3	NA	NO	Post (prior bilateral ovariectomy OR >12 mo since LMP with no prior hysterectomy)	0	2406	2406	0	2406	0	2406	0	CN high	158	NA	6.6599
TCGA-B5-A1N2-01A-21R-A144-07	TCGA-B5-A1N2-01A	TCGA-B5-A1N2-01	TCGA-B5-A1N2	01A	f88b3d7d-3895-4050-b370-656d0919bd8f	389	Dead	>=60	female	black or african american	Stage III	Serous cystadenocarcinoma, NOS	G3	40.3912	YES	Post (prior bilateral ovariectomy OR >12 mo since LMP with no prior hysterectomy)	1	954	804	1	804	1	954	1	Notassigned	131	NA	6.28656
TCGA-AJ-A3NE-01A-11R-A22K-07	TCGA-AJ-A3NE-01A	TCGA-AJ-A3NE-01	TCGA-AJ-A3NE	01A	d5bcfbd7-b6fa-4e41-860c-0a858c0e480f	628	Alive	<60	female	white	Stage I	Endometrioid adenocarcinoma, NOS	G3	31.25	NA	Pre (<6 months since LMP AND no prior bilateral ovariectomy AND not on estrogen replacement)	0	628	628	0	628	0	628	0	Notassigned	91	NA	6.95671
TCGA-DF-A2KZ-01A-11R-A213-07	TCGA-DF-A2KZ-01A	TCGA-DF-A2KZ-01	TCGA-DF-A2KZ	01A	5e35fd9e-7279-4595-bdb3-27d21e4ba5fa	826	Alive	>=60	female	not reported	Stage I	Endometrioid adenocarcinoma, NOS	G3	NA	NA	Post (prior bilateral ovariectomy OR >12 mo since LMP with no prior hysterectomy)	0	826	826	0	NA	NA	826	0	Notassigned	175	NA	5.75763
TCGA-A5-A7WJ-01A-12R-A34R-07	TCGA-A5-A7WJ-01A	TCGA-A5-A7WJ-01	TCGA-A5-A7WJ	01A	84bed714-c86c-47a1-af1d-b72840273a9b	341	Alive	>=60	female	black or african american	Stage I	Endometrioid adenocarcinoma, NOS	G2	22.1453	NO	Post (prior bilateral ovariectomy OR >12 mo since LMP with no prior hysterectomy)	0	341	341	0	341	0	341	0	Notassigned	137	NA	6.0637
TCGA-BS-A0V8-01A-11R-A118-07	TCGA-BS-A0V8-01A	TCGA-BS-A0V8-01	TCGA-BS-A0V8	01A	3d05e9c9-36ba-445f-a51d-b4091f8d38b4	2544	Alive	>=60	female	native hawaiian or other pacific islander	Stage II	Endometrioid adenocarcinoma, NOS	G2	34.4842	YES	Post (prior bilateral ovariectomy OR >12 mo since LMP with no prior hysterectomy)	0	2544	2544	0	2544	0	2544	0	CN high	568	NA	6.57311
TCGA-AX-A2H2-01A-11R-A180-07	TCGA-AX-A2H2-01A	TCGA-AX-A2H2-01	TCGA-AX-A2H2	01A	39f3c070-92e1-44ca-bd4e-734951ea866c	NA	Dead	>=60	female	black or african american	Stage II	Serous cystadenocarcinoma, NOS	G3	24.7676	YES	Post (prior bilateral ovariectomy OR >12 mo since LMP with no prior hysterectomy)	1	145	145	0	145	0	145	0	Notassigned	527	NA	7.38926
TCGA-BG-A0VZ-01A-11R-A109-07	TCGA-BG-A0VZ-01A	TCGA-BG-A0VZ-01	TCGA-BG-A0VZ	01A	2f12a765-c3c4-400c-9765-56bf1cc4a10e	1601	Alive	<60	female	white	Stage III	Endometrioid adenocarcinoma, NOS	G1	40.0367	NO	Post (prior bilateral ovariectomy OR >12 mo since LMP with no prior hysterectomy)	0	1601	1601	0	1601	0	1601	0	MSI	58	NA	3.94578
TCGA-FI-A2D5-01A-11R-A17B-07	TCGA-FI-A2D5-01A	TCGA-FI-A2D5-01	TCGA-FI-A2D5	01A	6abac00b-ac00-47e5-8c1d-2d697db1c0cb	NA	Dead	<60	female	white	Stage IV	Endometrioid adenocarcinoma, NOS	G3	35.9375	NO	Post (prior bilateral ovariectomy OR >12 mo since LMP with no prior hysterectomy)	1	421	280	1	NA	NA	421	1	Notassigned	196	NA	5.84707
TCGA-B5-A5OD-01A-11R-A31O-07	TCGA-B5-A5OD-01A	TCGA-B5-A5OD-01	TCGA-B5-A5OD	01A	de0ac7a9-1056-4422-b428-c79181273c66	1038	Alive	>=60	female	black or african american	Stage III	Serous cystadenocarcinoma, NOS	G3	NA	NO	NA	0	1038	1038	0	NA	NA	1038	0	Notassigned	384	NA	4.59356
TCGA-EO-A2CG-01A-12R-A180-07	TCGA-EO-A2CG-01A	TCGA-EO-A2CG-01	TCGA-EO-A2CG	01A	fd911aa9-122f-4d85-8a59-6a6c032b69f8	1564	Alive	>=60	female	asian	Stage I	Serous cystadenocarcinoma, NOS	G3	29.4321	NO	Post (prior bilateral ovariectomy OR >12 mo since LMP with no prior hysterectomy)	0	1564	1564	0	1564	0	1564	0	Notassigned	63	NA	6.02268
TCGA-EY-A1GE-01A-11R-A13S-07	TCGA-EY-A1GE-01A	TCGA-EY-A1GE-01	TCGA-EY-A1GE	01A	4ac05836-589b-4640-8026-41959c0d50f4	741	Alive	>=60	female	white	Stage I	Endometrioid adenocarcinoma, NOS	G1	37.8329	NO	Post (prior bilateral ovariectomy OR >12 mo since LMP with no prior hysterectomy)	0	741	741	0	741	0	741	0	Notassigned	68	NA	4.61249
TCGA-AX-A05Z-01A-11R-A00V-07	TCGA-AX-A05Z-01A	TCGA-AX-A05Z-01	TCGA-AX-A05Z	01A	38d6c8bf-a768-429d-96bc-b6c773a566ab	2175	Alive	<60	female	not reported	Stage III	Endometrioid adenocarcinoma, NOS	G2	29.3333	NA	Indeterminate (neither Pre or Postmenopausal)	0	2175	2175	0	2175	0	2175	0	POLE	343	NA	6.11543
TCGA-B5-A1MV-01A-31R-A14D-07	TCGA-B5-A1MV-01A	TCGA-B5-A1MV-01	TCGA-B5-A1MV	01A	b36e6ad1-4601-4e92-b9ea-9a729b6d873d	1565	Alive	>=60	female	white	Stage I	Endometrioid adenocarcinoma, NOS	G2	31.5776	NA	Post (prior bilateral ovariectomy OR >12 mo since LMP with no prior hysterectomy)	0	1565	1565	0	1565	0	1565	0	Notassigned	348	NA	5.95395
TCGA-D1-A160-01A-11R-A118-07	TCGA-D1-A160-01A	TCGA-D1-A160-01	TCGA-D1-A160	01A	9c2dbecc-f1db-4b43-88e5-e6898bb9a4b0	112	Alive	>=60	female	white	Stage I	Endometrioid adenocarcinoma, NOS	G2	41.2385	YES	Post (prior bilateral ovariectomy OR >12 mo since LMP with no prior hysterectomy)	0	112	112	0	112	0	112	0	MSI	561	NA	6.03759
TCGA-PG-A7D5-01A-11R-A34R-07	TCGA-PG-A7D5-01A	TCGA-PG-A7D5-01	TCGA-PG-A7D5	01A	2fdbb8fb-9a93-46e1-a62a-1141dd7da48a	1177	Alive	>=60	female	black or african american	Stage I	Serous cystadenocarcinoma, NOS	G3	31.6456	YES	Post (prior bilateral ovariectomy OR >12 mo since LMP with no prior hysterectomy)	0	1177	1177	0	NA	NA	1177	0	Notassigned	308	NA	6.67621
TCGA-D1-A0ZS-01A-11R-A118-07	TCGA-D1-A0ZS-01A	TCGA-D1-A0ZS-01	TCGA-D1-A0ZS	01A	1b81b3be-48fd-4510-81a1-0795de43907b	148	Alive	<60	female	white	Stage I	Endometrioid adenocarcinoma, NOS	G3	23.0518	NO	Post (prior bilateral ovariectomy OR >12 mo since LMP with no prior hysterectomy)	0	148	148	0	148	0	148	0	MSI	238	NA	5.94945
TCGA-AX-A06L-01A-11R-A118-07	TCGA-AX-A06L-01A	TCGA-AX-A06L-01	TCGA-AX-A06L	01A	8befb9ff-1628-4469-9b84-4fa9c72efd19	1845	Alive	>=60	female	white	Stage I	Endometrioid adenocarcinoma, NOS	G1	43.2082	NA	Post (prior bilateral ovariectomy OR >12 mo since LMP with no prior hysterectomy)	0	1845	1845	0	1845	0	1845	0	Notassigned	427	NA	3.72701
TCGA-DI-A1C3-01A-41R-A137-07	TCGA-DI-A1C3-01A	TCGA-DI-A1C3-01	TCGA-DI-A1C3	01A	ca667d02-0c68-4ece-8ede-a81413a629a5	739	Alive	<60	female	white	Stage I	Endometrioid adenocarcinoma, NOS	G2	49.2459	YES	NA	0	739	739	0	739	0	739	0	Notassigned	353	NA	5.19787
TCGA-DI-A2QY-01A-12R-A19W-07	TCGA-DI-A2QY-01A	TCGA-DI-A2QY-01	TCGA-DI-A2QY	01A	d0655562-fde7-45c1-8cbf-35addbd5753b	2797	Dead	>=60	female	white	Stage II	Serous cystadenocarcinoma, NOS	G3	33.2031	NO	Post (prior bilateral ovariectomy OR >12 mo since LMP with no prior hysterectomy)	1	3349	3349	0	3349	0	3349	0	Notassigned	594	NA	6.63378
