# Supplementary material for: Impairment of FBXO31-mediated Ubiquitination of OGT Upregulates O-GlcNAcylation to Advance Endometrial Malignancy
Source: Research Square preprint supplement (doi:10.21203/rs.3.rs-4019799/v1), 2024-04-12
Supplement: Supplementary file 9 [file a75f5e2a10271f7deb459b59.xlsx]

## Sheet: Sheet1
Supplementary table 3. TPM of 1000 O-GlcNAc correlated genes from TCGA UCEC dataset
ID	LINC01515	LINC01597	ARHGEF38	ABCC12	SPATA6L	CFAP70	CYP3A5	ACAT2	PKHD1	TOB1_AS1	ZNF19	ZNF487	MIR6772	DNAJB13	LINC00963	RRP12	SHANK1	MORN1	ZNF311	SIAE	LINC00240	PYROXD2	FBXO5	WDR76	COLQ	LRRC27	DLG5	DPCD	ZBED3_AS1	LETMD1	RRAD	KCNK6	LINC01277	DNAH6	IFT74	BEND7	HUS1	FANK1	TMPO	MORN4	MKLN1_AS	ZNF248	ZNF765	ATOH7	ZFYVE27	EBF3	HSPB11	URB1	GUCA1B
9a856422-27a8-4ab7-b936-9532982fbcc4	0.3191	0.8447	0.0594	0.0517	0.6623	0.444	2.7046	12.477	0.129	1.5471	1.2684	4.6152	3.5158	0.5421	15.9595	10.6143	1.1653	1.8524	2.4797	4.9483	0.6237	6.598	4.6683	3.7187	1.3653	3.0849	9.0433	37.6129	0.6018	33.0007	77.2995	49.5284	0.3948	0.4662	8.7197	7.0602	8.788	3.1038	25.6662	13.2571	1.424	15.6614	1.8347	0.4938	24.0267	14.9457	23.9035	11.8793	2.6103
06b9f277-ecaf-4f26-9992-b2b343c64592	2.0709	0	14.9315	0	2.0551	3.188	2.6734	55.112	0.3135	0.927	2.4696	7.4059	2.8478	4.0179	10.4046	21.8819	0.2432	2.0417	0.1148	17.8895	2.0352	6.8847	18.4336	17.6682	0.5675	2.9319	29.3866	110.043	1.3033	43.6605	3.529	46.421	0.3488	1.2003	24.9954	0.3639	18.5976	9.1698	164.948	17.1228	0.6541	11.577	6.9531	0.5999	22.0166	0.9364	28.9209	11.4637	1.0438
2f12a765-c3c4-400c-9765-56bf1cc4a10e	0.4624	3.621	3.1875	0.1004	0.9491	2.8397	1.2751	15.1121	0.0167	0.6169	1.278	3.1262	0	1.7885	8.5058	19.574	0.555	3.3765	0.0458	12.485	1.1239	1.7323	10.6445	7.9346	2.2661	4.2146	37.0253	74.4538	0.7531	28.0146	31.1829	19.3737	0.0348	3.0265	10.6808	5.6953	16.0403	8.9696	82.9834	11.067	0.8425	5.9706	2.4758	0.2875	22.6221	0.2404	19.707	8.0614	1.1541
2fff27b4-5e6d-4928-ac2a-cd14cc7d914d	0.1166	0.0227	1.1605	0	0.6067	0.8012	1.0753	75.5904	0.6129	1.0707	0.8802	4.0328	14.8022	0.3424	17.7419	47.3012	0.2709	5.157	0.2557	5.0422	1.8488	11.5901	9.7921	23.0342	0.7131	4.0483	61.9703	55.5424	0.8655	19.3848	62.3841	13.472	0.0648	0.0601	2.5479	7.6867	18.4237	0.282	73.4801	17.1323	2.7105	7.6125	5.0424	1.9601	25.9284	0.1242	31.2449	21.7774	2.9213
eaebe02d-406c-4499-8ff4-20b98702792c	1.0883	1.1129	5.1715	0.0601	1.7514	5.3917	0.9938	22.116	1.3284	1.0338	2.7951	9.6415	2.7222	14.041	14.8137	26.3508	0.2159	7.0998	4.8273	14.168	4.6153	5.86	7.3195	7.0909	2.2951	8.9383	26.1996	146.61	1.2358	31.8289	76.3919	39.7139	0.0417	10.6874	12.9044	7.4433	9.5372	39.419	45.8618	19.697	1.2303	10.4452	3.5843	0.9176	36.3725	0.0639	24.748	19.9836	4.2212
16a248f2-9b21-4cfd-b3bf-1817e692d20d	0.9106	0.1601	2.8907	0.0274	1.1648	2.82	1.4314	19.8547	0.0137	1.0095	1.1876	4.8389	0	0.3443	6.5696	9.7735	0.8854	1.1764	0.7499	12.7352	1.3863	5.7308	8.7089	12.2784	0.5134	2.2781	7.7574	31.6897	0.5816	24.9932	1.4876	13.8621	0	0.3172	12.5023	1.9494	10.5788	9.8556	71.5226	9.0071	0.8547	6.5023	2.4307	0.9407	10.934	0.2622	23.6898	8.6345	0.8394
08b1942b-5abc-4e06-8ca7-ef62cf7209e3	0.0986	0	0.0358	0	0.525	0.073	1.2293	31.343	0.0117	1.4177	0.9187	2.5057	0	0	6.0202	44.0066	0.2003	1.4652	0.1281	9.4493	0.4832	2.298	10.9364	15.9211	0.3085	3.0834	3.3512	77.9021	0.1222	14.8815	4.997	4.8475	0	0.0602	4.2112	1.5566	14.2597	0.6055	33.4126	12.6582	1.2715	4.0927	0.648	0.4463	37.49	2.0651	36.8539	6.1064	3.5841
fd911aa9-122f-4d85-8a59-6a6c032b69f8	0.6614	1.7073	0.2805	0.0543	0.5134	0.6197	1.179	10.9195	0.1219	0.267	1.1394	6.0102	0	1.3658	5.0965	22.626	1.8462	1.8022	4.1276	2.9675	2.4832	15.4616	6.8913	4.1367	3.4794	2.9679	24.4525	65.1615	0.5493	25.0025	15.196	13.0394	0.113	1.0837	4.1709	7.2502	5.5293	7.5593	42.5263	12.3649	0.3145	7.2264	3.1281	0.5442	17.6894	0.4334	22.3551	6.6133	3.954
0c140462-f26e-4d98-b49d-17a6af669919	1.1818	0.0348	0.1548	0	0.1594	0.0557	1.5325	48.6923	0.0554	0.312	0.965	3.0046	1.0783	0.2993	1.5307	45.3602	0.2171	0.7731	0.2173	6.8934	0.0246	5.553	33.3065	26.3005	1.4381	2.3884	32.8428	85.7029	0.7503	27.3894	3.8364	2.0811	0.066	0.1021	5.3582	1.8944	16.6522	3.164	144.755	26.8682	1.2463	13.416	3.8849	0.0454	14.7616	0.4812	26.9066	25.996	2.3409
2d6b4ddd-ceae-4703-97f9-cce83beecef3	0.7224	3.0842	0	0.0227	0.5896	1.3273	0.4823	16.7461	0.0113	2.7316	0.4491	3.5121	3.0827	0.5704	39.3711	52.4627	0.0188	11.4159	4.0377	4.0537	0.7734	31.2398	3.8373	2.7253	4.7255	5.6099	28.7856	80.7362	0.8029	39.7721	13.0623	8.9241	0.3776	0.4526	3.6872	7.0306	20.3685	4.8163	14.8583	20.7343	0.4111	6.496	1.0067	2.3379	45.6414	1.1946	9.6479	23.3536	1.5644
3728822d-43ab-4cda-8b0c-d4b1ff402485	1.6666	0.2195	3.4086	0.0131	0.9412	3.3313	1.0528	18.2471	0.0846	0.5295	1.1757	6.8345	0.8873	4.166	7.2465	60.9666	0.0812	2.3492	0	3.8939	1.3424	3.6877	9.4102	6.9476	2.3666	6.5427	9.3615	245.544	1.4923	37.1666	6.278	3.2315	0.1494	2.7859	6.3832	3.1403	19.4693	22.0447	39.7123	18.6949	0.493	5.6949	1.6834	1.3458	44.7554	0.0834	24.3501	5.2584	1.7511
2bc73f03-f0e3-4e41-b909-d9d89405e09c	0.2817	0.6801	4.2792	0.0321	1.9995	0.9198	1.8048	25.5341	0.3319	0.5913	2.0795	2.4836	4.3598	1.5882	10.9053	20.0542	0.0731	1.1198	0.6589	53.8605	1.3341	14.4927	5.2281	3.5618	1.3199	4.2642	20.7475	71.53	1.5857	12.2582	105.963	3.619	0.267	0.5523	11.0046	2.0959	14.4369	16.8212	26.7845	11.9963	1.4213	5.4645	2.5143	0.2296	35.9426	0.128	23.577	10.2255	0.1844
4ac05836-589b-4640-8026-41959c0d50f4	0.8729	1.2545	5.4767	0.0134	2.9782	17.2123	0.9146	9.5445	0.234	2.0759	3.7669	14.6892	0	17.0259	47.8099	22.1901	0.2334	7.8275	0.9913	17.8546	3.103	11.7365	2.0262	2.6176	3.7986	7.3313	24.4216	107.646	0.7593	24.513	185.878	31.5537	0.1116	19.6393	15.2554	5.5407	10.0512	41.1383	17.7016	14.5299	1.809	6.1433	2.1346	0.9212	36.1885	0.3423	21.4911	32.8226	2.8254
0b5db044-cc84-4ed9-a5b9-b382927e2b54	0.8201	0.0524	2.9556	0.006	0.9462	0.6295	0.7148	40.1813	0	0.3672	0.2141	2.6151	0.8122	0.2066	3.2039	23.4698	0.2874	1.9578	3.6006	6.7492	0.3767	6.4958	18.3735	5.898	0.8964	3.0374	51.9945	51.5493	0.4986	30.7294	0.3571	44.176	0.1244	0.9116	8.293	0.1816	13.5659	1.8879	54.2857	8.2977	0.8425	6.4538	4.6902	0.6502	36.0218	0.0668	20.5083	13.214	7.0756
25e152c1-bbdd-404d-853c-d21d6e6d2962	1.4534	1.2188	1.2754	0.0463	1.587	2.2765	3.9392	14.5775	0.0231	0.9106	2.489	5.6122	3.1471	1.0919	21.3499	12.9175	3.4942	3.9085	2.9806	9.0498	1.8184	12.7154	4.5966	3.8256	3.2323	3.5554	23.2489	23.1072	0.6206	43.3748	52.0833	15.2497	0.1927	1.4904	9.715	9.8314	8.4144	3.0581	46.1702	21.1677	2.0985	14.3689	2.8387	1.0608	37.4003	1.2935	21.5083	18.8622	5.5899
314564ea-f23e-4097-9932-b02792584857	0.3158	0.6189	0.4138	0.0314	0.8707	1.8899	1.528	18.5511	1.0398	0.7321	0.5913	3.5359	0	11.4339	7.3294	44.513	0.9619	5.2204	3.0486	6.1779	0.3888	16.3008	2.5109	3.2965	1.8291	4.0081	13.8317	127.901	0.6105	14.5141	19.9315	6.1906	1.1745	0.9687	3.3357	3.4712	8.4801	10.5149	21.3749	14.0061	0.7262	7.4836	2.1649	0.4489	33.0867	0.5755	12.5663	28.1149	1.7422
1e35ac73-0f87-46b1-8a2f-66276bc9fa02	0.7546	0.5369	3.249	0	0.4619	0.4437	2.5611	5.7788	0.2068	0.7279	0.6032	2.4325	1.61	0.6703	9.2743	10.9699	1.0804	0.7544	0.8111	7.9842	0.9181	2.8793	4.8368	4.2956	1.4068	3.1271	3.8862	30.8944	0.1857	20.6187	6.1787	36.5025	0.1479	0.9302	8.0004	3.7749	9.5497	4.0493	23.4143	11.0344	1.169	5.2447	1.8278	0.6105	14.0596	0.3025	17.6536	5.077	0.5901
14862167-5eae-4c97-9537-b5435e63a7d1	1.6889	0.0206	0.9374	0	0.5326	1.1869	1.7347	28.458	0.0281	1.3847	0.8367	2.015	0	1.3726	4.9298	25.2525	0.0701	2.2261	3.1246	12.4955	0.8732	10.2702	11.8828	29.4044	2.8171	1.9389	25.9961	41.3691	0.8619	27.0943	1.3009	1.4897	0.0879	0.0453	5.5894	1.7243	24.2379	0.4377	52.3327	5.0234	1.0637	6.8408	4.4953	0.9678	12.0031	0.045	13.6941	28.8972	2.4826
b2f45b71-e522-464c-bb3e-a3f3e17ea86a	0.1018	2.3148	0.6768	0	0.0734	0.0727	0.3438	14.4776	2.9953	0.5722	0.2195	2.4295	0	0.2927	4.7414	9.7981	0.2059	1.5005	3.1031	5.4644	0.6255	2.0259	4.4465	5.4948	0.6144	1.9605	12.5233	24.2705	0.0157	11.5488	25.5506	26.2655	0.0969	0.03	3.4322	3.8542	6.5477	3.2555	21.9077	2.9559	0.3751	2.7783	1.848	0.4444	13.9541	1.9817	12.0813	6.0385	0.6542
9bee04ab-cf4d-4191-85c5-d413d3e4c05d	0.8229	1.8163	3.0749	0	0.5871	7.4769	2.1069	25.8526	4.8405	0.8723	2.4931	14.4559	2.4118	0.781	20.0379	44.4299	14.4336	3.7578	1.215	32.8619	0.0183	3.9537	14.651	13.0597	1.294	5.6239	37.0894	117.296	1.0859	22.8258	8.7735	4.2042	0.2216	8.2123	14.6147	10.1846	22.3843	20.449	141.514	29.3103	1.501	9.6988	4.6134	0.8129	46.2393	0.085	45.598	20.2805	0.408
cf1a0bd8-1f5d-487a-90a3-efd038575b1d	0.2296	6.972	0.2097	0.1246	0.3141	0.4083	0.8759	20.7	0.0166	2.7972	1.1593	6.3198	0	0.8879	3.6628	20.5448	2.2454	1.9695	0.455	8.774	2.6438	10.6191	13.6234	7.8247	0.45	2.551	4.7209	34.5695	0.6554	22.7485	5.7771	7.1813	0.2939	0.1337	5.4117	2.3225	15.0068	0.6023	73.4658	11.0171	1.6981	5.7299	2.1011	1.2844	25.056	1.0872	31.0572	9.6517	0.8595
1e655307-21a7-430a-8f85-a2d5f8b26662	0.1305	2.5809	0.6633	0.0206	1.232	0.8336	0.9878	3.3343	0.4247	0.241	0.8614	6.324	0.7015	2.0119	12.1793	12.7169	0.2953	1.2909	0.0707	4.9956	1.6372	4.4022	1.2574	1.8715	0.957	3.5446	1.9026	83.9995	0.2793	10.0847	7.9356	17.25	0.0215	2.3619	2.9366	0.6184	4.8936	18.9652	9.0337	6.9342	0.4781	2.7777	0.4	0.2955	12.8498	0.3954	11.7984	3.2748	0.7911
a6619a5f-fd99-49f8-8e41-2d28b8bd54db	0.2542	1.7559	0.786	0.0534	0.1787	0.354	2.7823	35.3011	0.1198	1.3774	1.1659	2.9944	0	2.0413	5.6879	32.8769	0.118	2.573	0.1705	10.5542	0.6986	6.4262	13.8858	3.7409	0.4819	3.3776	4.193	105.287	0.2114	25.2315	150.159	4.353	0.1296	0.2462	5.242	1.035	6.4464	0.8293	44.4055	8.9018	0.8958	4.6283	4.1176	1.0188	24.4488	10.1226	15.65	10.9097	4.8402
8ec15c44-02be-4687-bce3-68f468452f6c	0.2489	0.3626	5.8875	0.2197	4.6391	21.4313	1.5258	4.8583	0.4559	1.5327	3.4411	14.0384	3.8525	27.8683	20.9294	18.87	1.0517	14.9954	0.2911	7.8738	4.2543	12.1845	3.1971	2.2503	5.5956	16.1121	8.2128	179.853	0.878	22.8697	229.427	18.8877	0.2212	26.9566	19.3212	2.855	6.6746	74.7607	16.9078	15.7781	0.8563	5.8942	1.398	1.0145	39.9814	0.6334	56.7596	10.9527	4.9149
b7e225b7-54a3-4c98-9164-50596ed047ee	0.5498	0.7088	6.3975	0.0255	3.0603	5.5395	2.5885	7.653	0.7571	0.5644	1.9247	7.3006	3.4678	10.5875	18.3343	20.4008	0.0635	4.1795	1.747	14.3123	3.4669	8.4411	3.8563	1.5876	2.3124	5.6932	4.7664	100.403	0.7097	22.7382	116.929	70.6866	0.1327	5.4441	7.5636	1.7058	7.3801	41.2622	18.843	9.9395	1.3232	5.7243	1.7078	0.4383	26.2977	0.3054	20.0821	11.6814	3.8619
12d35356-b491-4718-acc8-dc365d40581c	1.0815	0.7652	3.6034	0.1539	1.1277	9.4941	1.4457	15.1191	0.2687	0.7188	3.4398	6.3474	2.092	7.2582	11.689	21.5537	2.527	4.8067	2.0235	16.5561	1.0497	14.4803	6.8751	4.2935	4.8746	6.4151	47.41	79.8909	1.5102	44.1714	51.0138	56.2869	0.2242	8.362	15.1425	6.5889	14.5302	22.4014	33.1969	16.2566	1.3485	13.2807	3.2535	1.3222	34.7174	1.9899	20.578	55.2779	8.3165
70fd4ee9-d29b-43f6-a434-149b7a65197f	0.5546	0.8754	0.8702	0.0133	0.5974	0.327	4.7743	1.0525	0.0066	1.2753	0.8531	3.4709	0	0	16.8087	8.1412	3.4196	2.8276	0.5466	0.6876	1.416	17.2169	0.5402	1.6271	0.9979	5.4744	0.4298	22.2421	0.0269	19.953	15.758	48.2948	0	0.8992	2.7353	1.4555	2.7786	3.9965	4.6574	4.4227	0.9378	10.2407	3.2902	0	22.1719	0.361	11.2802	3.5688	4.5373
d8ad017c-bf83-42cf-9d46-4f47c8d28a8f	0.9045	2.8233	5.248	0	2.0416	5.3355	1.4793	19.6677	0.2317	0.2855	1.6564	6.9642	0	7.1198	5.9075	24.1938	0.313	4.7007	2.7833	13.5679	1.7552	3.7902	10.1853	5.9498	1.5426	5.6004	11.2093	99.8477	0.8003	32.4504	18.4576	3.0711	0.6042	4.934	17.163	8.5089	10.6425	32.5204	72.9948	16.1877	0.614	10.4299	2.639	0.2494	30.6723	0.9037	39.3221	9.631	2.7816
392b1414-ea30-4f14-9797-8e7798dc1341	0.0617	0.0963	0.4534	0	0.817	1.9652	1.1085	15.1925	1.0508	0.6474	1.6453	2.7153	0	2.277	6.3115	13.3637	0.0546	1.5409	0.2705	19.5669	0.3742	6.4463	4.0105	5.2274	1.3719	2.9634	13.8826	18.9677	0.2497	14.1006	2.6831	25.49	0.2055	1.2079	7.556	4.1164	15.0581	4.8597	26.0498	6.6123	0.7625	4.7147	2.2732	1.3197	19.9048	0.2627	13.1471	7.5053	1.1354
9189b3b3-9331-4b1a-8abd-dc5f37af919d	0	0.0204	0.4649	0.0279	0.066	0.327	1.114	94.3458	0.007	0.4464	0.6718	1.6459	0	0.3513	3.5678	33.7225	0.0347	1.3826	0	10.4531	0.1732	0.5973	16.1344	19.3029	0.291	1.5849	22.3004	138.399	0.4875	18.4726	1.7456	22.951	0.0291	0.4496	9.4344	0.0364	13.4203	3.7984	57.4387	16.0597	0.2813	3.4008	5.0294	0.9599	16.7668	0.1338	15.3608	14.0864	0.2676
e61b4b6e-6426-41a8-a959-99d300d5c531	0.4511	1.4418	5.9999	0	2.0053	0.4026	1.9506	7.7853	0.3774	0.8455	1.6001	6.3685	0	12.3993	9.8133	48.0375	0.3232	1.4779	0.314	12.3944	0.1659	9.5993	11.3806	16.0895	1.1944	3.1395	28.6477	66.2934	0.3015	17.2288	1.4951	6.3385	0.0954	0.4871	7.2365	0.2389	25.3349	13.1238	77.1544	24.8543	2.4016	7.3614	6.1718	0.7879	61.34	0.2562	28.2019	25.2496	0.8787
db48adca-406c-4b3d-8e51-41e9ab1c24be	0.1735	2.012	4.5448	0.0529	3.9087	1.0117	1.6178	9.4199	0.7434	0.542	1.9379	4.3203	8.3918	4.8525	16.604	24.3337	0.0293	3.4041	0.0966	7.512	5.7056	8.3177	7.8596	5.4885	1.3232	5.7511	1.5126	96.4171	0.5442	24.6127	43.179	19.3928	0.1468	2.5265	7.3805	3.883	7.5344	27.7755	41.0171	7.3304	1.2258	8.5473	1.883	0.9092	37.3296	0.0704	36.0144	6.3876	1.8928
9f980b87-f3dc-48e9-9d65-a60d314642aa	0.6071	0.7364	0.136	0	1.733	0.3207	0.945	9.4966	0.0037	0.5461	0.9219	6.2207	0	0.0699	6.2933	31.2272	4.8883	4.1996	1.0345	5.6061	1.3087	9.2513	7.4852	9.2014	0.4784	2.8235	1.7978	244.826	0.5394	29.3398	1.0865	30.2388	0.1387	0.6722	3.922	4.9262	8.0745	3.4332	41.2953	14.5933	0.5221	3.0317	2.0613	2.6296	27.3467	0.0827	40.9359	3.073	1.7313
acdfe319-b98d-4208-b528-6841ab3514b0	0.0127	0.3574	0.7636	0.0272	0.7863	1.2556	11.9481	19.0229	0.2709	0.7677	1.2036	2.9713	0	2.8602	5.786	16.093	0.1351	1.938	0.1116	4.8541	0.6876	19.804	3.1858	7.3425	2.0936	4.2318	1.8787	49.875	0.1786	23.7535	2.6561	7.1432	0.113	0.0787	6.4442	0.0825	4.4526	3.3759	31.9002	10.6742	0.629	5.2992	1.5212	0.6999	21.6005	0.1084	22.0839	4.8396	1.7692
94d4253a-b7ba-4138-b893-cdc493a6a5ee	0.2497	0.2372	2.1143	0.0116	2.5607	2.6447	0.9241	5.3091	0.4045	0.3418	0.5791	7.236	0	4.9542	8.4057	9.419	0.0769	2.5517	0.0952	5.4522	2.742	5.5288	2.2481	1.7404	1.2554	3.1904	5.3086	75.7614	0.2051	8.7896	29.2128	31.7522	0.0482	4.781	5.6652	0.7144	3.3639	18.6949	11.9087	6.5004	0.4551	3.4433	0.9634	0.1991	9.7203	0.111	14.2846	6.023	0.9325
d5bcfbd7-b6fa-4e41-860c-0a858c0e480f	0.0197	0.3691	2.7716	0.0168	0.9547	0.8273	11.4158	62.188	0.1721	0.4757	1.1188	3.8385	2.2875	1.9047	6.3906	31.9525	1.8002	2.021	0.1844	32.038	0.1304	10.6817	15.946	14.3186	0.5435	3.0044	56.0432	50.6469	0.2043	26.0665	5.1665	36.0422	0.2277	0.2708	13.8916	0.2557	12.7946	9.0438	68.6088	10.2573	1.4999	5.9853	3.3025	0.1446	44.0438	0.0537	32.5333	22.6691	0.9996
32ffdfa3-91d3-4583-811f-40752d73182e	0.1499	0.0199	1.7506	0	0.7806	0.9485	68.1981	33.8051	0.0238	0.4185	1.0852	2.877	1.8512	0.4282	6.7214	20.5515	0.8809	2.3879	0.1679	7.3983	0.0915	3.4945	1.8742	1.169	0.9081	2.6683	28.7612	100.049	0.093	17.3332	28.6752	11.3519	0.1842	0.3331	7.8717	0.1951	9.9416	13.0855	15.3147	9.4563	0.6378	3.5434	1.9144	0.117	34.5488	0.0435	19.0561	4.9628	0.3392
1c3782e0-ef74-4e89-ba39-07b30cd4afad	0.5336	7.9666	1.1794	0	0.9511	0.6377	1.8543	10.8977	1.8093	1.2174	0.6539	3.8558	3.366	0.7396	29.8724	13.614	0.7906	1.2066	1.6957	6.5062	0.6142	6.5213	6.0895	3.7728	1.419	2.5476	4.6983	37.5814	0.2693	23.8031	23.0764	10.5128	0.1546	0.6456	4.8698	5.5265	11.7927	4.4252	50.2817	12.778	1.6959	12.8267	1.361	2.8364	23.979	0.2569	23.4702	6.9914	0.4271
c2a6ca43-0e81-42fc-8619-3e2f1bf2469f	0.3735	0.4448	0.2769	0	1.3636	1.3997	0.3346	5.982	0.0105	0.7477	0.7023	0.512	2.8516	0.6925	6.0527	7.2324	0.5132	0.5554	3.5052	7.24	1.149	4.9344	5.1825	2.2284	1.0054	1.6266	3.9021	25.3084	0.4191	22.5858	4.6167	51.3359	0.0655	0.8575	4.9281	3.6253	6.7918	1.8201	30.2594	3.5963	0.4648	7.3987	0.8204	0.6007	9.7125	1.2055	16.9388	6.2975	0.804
d512620a-6a4e-4f8b-88a7-3dbad09b951d	0.102	0.0735	0.4996	0	0.2572	0.8231	1.5282	22.4638	0.0084	0.3704	1.2158	3.1848	2.2759	0.0526	5.7368	16.48	1.3467	1.2334	0.6421	10.1864	0.2076	5.0876	11.7099	10.2038	1.5699	2.4318	22.5698	68.9089	0.3557	27.9142	3.2752	7.0372	0.1045	0.2695	7.1657	4.7108	12.5198	1.9947	61.0529	18.5549	0.5733	7.4537	3.2798	0.4794	24.6185	0.1604	17.9769	12.928	0.8342
61883003-3126-4d8a-aa90-3d9f8725683b	0.7049	0.5679	0.6685	0	0.1721	1.6478	0.2438	76.1672	0.0161	0.5966	0.3815	0.8443	2.1994	0.3561	7.6454	22.7751	12.9208	2.8805	0.0886	7.6487	0.602	5.3172	7.3008	12.708	0.8429	1.273	151.176	42.3695	0.4583	24.3623	1.9342	6.0704	0.0673	0.5416	1.1993	5.8029	22.5081	2.0115	52.8222	8.7975	0.4889	4.345	3.9676	1.112	15.5598	0	6.462	27.5199	3.3485
147ef440-83e0-4363-a888-24d3dff94c9e	0.0047	2.229	3.5452	0.0404	2.1355	5.2346	1.4492	12.9781	0.287	0.6948	1.7802	7.4598	13.7216	11.8699	20.965	19.7897	0.4102	3.9583	0.9401	8.7503	5.0492	8.7932	2.6191	3.0327	1.7248	5.3989	8.2047	92.4921	0.3574	18.8244	228.569	23.2359	0.1471	5.3026	7.5786	2.3668	7.3164	24.8369	22.4144	8.9147	0.8337	7.6385	1.5151	0.4047	27.118	0.1934	19.632	10.3645	2.6307
2a675a2c-53ca-4fa1-80d8-d9d59bda26d9	0.0925	0.1651	5.0122	0.0635	3.1101	3.9145	1.9257	6.5819	0.0317	0.4162	2.9541	7.9215	0	7.2978	10.42	16.8033	0.0995	3.6652	0.6764	8.6987	4.5716	5.2087	1.6872	1.9228	5.8363	4.1683	3.3027	93.7896	0.4853	35.0537	59.0385	13.0556	0.1322	7.8481	11.4286	1.1212	8.8271	49.2442	15.3984	21.4526	1.5419	6.1806	1.6257	0.0404	24.5729	0.5744	23.1134	7.024	0.8652
233e6b31-248c-4487-85a7-c04c77fb0bb1	0.2448	0.029	0.6149	0	0.8051	0.2942	0.5568	7.5442	0.0165	0.4715	1.5095	3.4293	0	0.1664	5.6657	27.6336	0	1.8323	0.0181	1.5669	1.579	6.9972	4.3872	4.3007	0.3032	5.8191	1.3317	245.306	0.0669	11.8573	15.4185	12.2955	0.1239	0.7536	2.641	1.7174	10.5687	10.8606	13.2646	7.9943	1.0725	2.9603	0.5593	0.7197	27.361	0	23.5255	3.5941	2.8137
209d25d9-f9d0-4348-b137-78ab12be1fc8	0.8226	2.4534	0.7574	0.0447	0.5023	6.5854	0.9515	54.9372	0.0279	2.0895	3.3858	3.9162	0	0.9846	4.5033	14.4771	0.2875	3.0812	7.9348	8.1898	2.6238	9.9945	37.7245	10.9926	1.9344	9.9586	96.2265	34.0641	0.5318	69.6209	1.6409	6.2785	0.5121	1.3392	34.4172	0.3011	14.2974	10.5731	192.256	10.8457	4.3931	19.4496	2.3644	1.0249	20.189	0.0714	33.6639	25.4665	0.9859
9e0d6f6d-1603-4a21-9106-220f85f05d4c	0.1027	0.2895	1.2739	0.0919	0.9274	4.3446	2.2428	45.4451	0.0458	1.651	1.9467	5.034	1.9219	3.8675	17.4416	25.7864	0.3048	2.8698	1.1812	9.5082	0.4018	6.2059	22.6009	18.5387	2.5338	2.9147	37.944	71.6861	0.8832	29.0485	15.9038	13.3614	0.2796	5.4294	17.3934	8.1528	26.5058	15.0689	102.393	14.6166	1.0894	9.9059	5.4698	1.3361	36.2484	10.5739	30.4034	20.4703	2.1946
46d6837d-c3c1-4e25-acb9-717a6fe513ff	0.0132	0	0.4052	0	0.6342	1.5209	2.1776	17.9237	0.0141	0.3124	1.8645	5.1588	1.9197	0.888	11.975	40.9675	0.3513	3.1752	0.0774	28.5744	0.9924	0.6358	12.5217	14.8195	0.7945	2.0192	48.6171	71.4923	0.4143	27.0893	2.9928	29.6193	0.1176	0.3364	6.5507	8.3762	11.2682	9.5829	53.4635	37.1708	1.0098	8.512	5.722	1.2941	44.2091	13.6836	36.5389	17.3121	2.652
adda4f57-c727-4e28-a719-9745a44ac099	1.4941	7.5155	5.4053	0	2.2069	3.5979	5.4476	19.5022	1.1291	0.7718	1.496	7.1213	0	8.8844	12.796	38.2115	1.0689	3.0434	0.1358	22.9726	1.4345	8.6294	8.1276	6.915	1.5151	7.2256	29.6969	153.793	0.6018	34.8678	55.4032	17.1544	0.1376	4.2339	9.3839	0.4736	12.6675	27.1772	43.223	24.2654	2.0138	10.1179	2.5501	0.3786	37.8668	0.0528	18.269	14.3673	0.4433
083227fd-5547-4b9b-a62d-8d78c529618c	0.3413	0.7536	1.2849	0.0533	1.1971	0.312	1.3858	52.5477	0.5672	1.3542	0.9217	3.5598	0	9.7775	10.3863	37.1765	0.2358	2.4	0.146	8.5919	0.2938	6.0799	13.7918	23.8721	1.5182	2.9441	25.8692	76.7042	0.1618	21.0418	19.5057	18.8985	0.074	0.1945	5.9697	0.0463	15.3669	2.5774	74.8425	11.4471	0.6443	3.9026	5.1215	1.2213	33.1874	0.4255	25.0461	11.4526	1.0216
2be1e943-4726-4438-8b1e-29e40c3ad82d	0.3528	0.1991	1.8642	0	0.9116	0.9879	1.4877	27.2219	0.0226	0.7807	1.9255	3.1162	1.2335	1.4551	6.2746	28.4064	0.1053	2.7087	0.0497	12.9179	0.8534	19.5061	16.276	21.5761	1.2669	7.2559	9.5033	83.9389	0.2019	18.5188	13.6093	4.9148	0.0378	1.0982	9.7201	0.2285	9.8751	2.3267	70.4993	15.4933	1.2978	5.686	2.1613	2.0788	39.6034	0.1593	40.6273	7.3723	3.6168
a9905756-47e4-4ecf-9122-dca6f41b0f6f	0.6208	0.9863	2.8246	0.0118	1.9717	1.759	1.6253	28.2792	0.242	0.4363	1.2832	1.8325	0	1.5625	6.0521	12.9621	0.5102	1.4346	0.1945	10.2312	0.5992	4.2879	7.9818	5.0783	1.1835	2.0408	5.5978	45.2287	0.9875	21.0242	6.4295	22.9638	0.197	0.716	9.3643	3.0723	7.5627	4.4129	49.5059	6.6384	1.43	7.047	2.8848	0.2033	13.6756	0.3211	21.4023	8.6597	2.2673
05bbb953-4b8b-45da-861a-3044c0ba4716	0.657	1.5303	0.4249	0.0641	2.7681	1.3916	2.8137	14.4329	0.2698	0.8225	0.8929	3.0918	0	0.8282	25.5065	18.4076	3.0993	1.2346	1.404	3.3883	0.5739	4.8873	5.3163	3.5442	2.8778	2.5958	5.0431	65.7413	0.4717	21.0069	7.582	23.0439	0.0296	0.8707	5.2426	7.6844	4.5055	13.3489	17.5565	9.1962	0.2796	2.7529	0.6321	0.1223	24.3981	1.4432	23.9818	3.8414	1.2823
c51397e3-6fa4-40ed-b822-f3af8adf80a0	0.334	0.7634	2.2211	0	2.1517	3.3681	0.5867	10.8284	0.6985	1.0641	0.5883	4.715	0	9.3268	32.7258	20.3107	0.1689	2.5108	0.0697	5.4976	0.1316	3.2383	6.0608	5.9287	2.4407	2.2056	9.5993	95.4991	0.4701	19.0599	15.0817	63.4611	0.7154	4.0898	7.9756	0.2985	10.1852	13.6184	32.9493	13.3601	1.0514	7.2483	2.6555	0.4375	21.4476	0.1626	24.5029	10.1211	0.4879
9f972b99-91b4-4b27-b281-4aabbf2c0cf5	0.311	1.3717	0.5631	0.0289	0.6651	0.8277	0.6394	12.1782	1.5762	0.3902	1.1023	3.5709	1.9616	3.675	10.3531	37.8432	0.3949	2.1372	2.0159	18.6003	2.3712	5.5868	9.8648	3.2825	2.0447	2.7946	16.655	47.2911	0.4306	20.0215	33.7179	1.7911	0.1802	0.4831	6.7627	11.4538	21.3102	3.2889	76.9523	15.2928	1.2789	22.8725	3.9352	0.7438	35.096	0.4146	19.3364	28.7119	1.1614
08bf36be-d2a7-4cf8-b514-96cafe0a30a1	0.7179	0.971	1.4538	0.0409	1.9317	2.4275	1.72	21.5864	0.0153	0.7534	2.3699	5.9672	0	4.079	10.962	40.325	0.2372	6.0988	0.1119	12.9913	1.3197	14.1642	9.8643	6.0066	3.8316	5.3168	17.7996	129.864	1.1832	43.7726	114.683	8.2128	0.2551	5.9252	15.7299	8.0461	12.6959	28.1245	65.8325	17.7955	0.7202	7.4009	3.8727	0.5851	37.062	0.0163	30.3037	17.2044	0.5481
1eb99d39-5b01-47df-b83b-6c4fc1328dd5	0.3342	0.3414	1.5331	0.013	1.4714	0.2884	0.4367	15.1775	0.0065	0.2232	0.2568	2.5325	0	0.9378	7.2592	22.3298	15.7125	3.324	0.1066	12.7644	0.8176	6.9477	5.9983	13.5815	0.7026	1.9426	43.7014	88.3395	0.2099	25.1577	33.8268	69.7299	0.054	0.5844	2.1086	3.8292	10.9169	6.953	23.8983	10.3304	0.3657	3.7304	2.1476	0.0743	25.6384	0.0828	8.4826	9.5016	0.5964
7321d9b7-5588-4ac1-a5ab-c4fcab93b849	0.8107	0.0904	2.2521	0	1.26	1.1213	4.4911	29.7969	0.917	0.8736	1.122	2.731	0	4.8579	11.3814	21.5754	0.4613	2.7033	0.2116	21.5959	0.6706	13.7025	9.3074	14.5226	1.4166	4.5819	33.6298	56.5966	0.2579	24.4678	9.991	13.4896	0.0643	0.0796	7.4071	0.1744	14.7165	2.7612	47.1519	8.9897	1.2605	5.3664	3.1791	0.8849	26.9248	0.074	17.7523	16.5453	1.1843
0494b587-7b21-428b-be16-111bb3bf8631	0.466	8.2375	0.1328	0.1735	0.2187	0.5145	1.3428	37.4058	1.5345	2.4453	0.5672	2.4533	0	0.7273	10.4732	21.7675	20.152	1.9527	0.095	9.9642	0.0717	5.9621	12.4478	12.6837	2.7235	2.9838	26.3448	44.8681	0.9653	27.0916	2.8283	6.2646	0.1444	0.4095	3.8303	5.8961	13.4329	1.1384	55.3454	18.587	0.5126	8.2693	3.4069	1.0599	26.4791	0.7201	15.2981	13.687	4.0782
85eafb47-339e-4fe2-b46a-757c894bf599	0.3701	1.057	1.8713	0.0841	0.0993	0.669	0.998	33.4137	0.6204	0.6611	0.4439	2.3203	0	0.8456	5.6036	34.1365	0.446	1.3544	0.1842	8.7244	0.6427	17.8583	4.8921	6.06	1.9615	2.7339	8.203	76.8784	0.6461	46.5707	110.703	34.1164	0.2449	0.4328	13.2428	0.2482	17.7306	7.5751	34.9838	9.3724	1.4051	3.6313	3.352	0.1925	16.3148	0.2415	11.3348	6.8218	0.2577
3d71658d-130e-48ad-ae66-05a127c2196c	0.0467	0.0486	1.5244	0	0.3924	1.7103	0.9564	51.285	0.0414	0.2041	1.143	2.0682	0	1.0962	7.4654	36.7326	0.0826	1.5798	0.5457	19.9346	0.5148	1.8686	13.3728	16.6745	1.3147	3.1023	18.4197	43.6483	0.7642	35.6313	5.5034	38.9906	0.0691	0.6092	1.9452	10.4964	27.1889	2.9671	77.8805	15.6976	2.5584	6.8961	4.9021	0.3804	23.3017	0.6096	13.262	24.6434	1.8453
c84c0a5d-40be-4488-b16a-f17076fbaa51	0.0557	0.2732	0.9355	0	1.1842	2.2264	0.933	21.5533	0.0254	0.7514	1.9218	3.8307	6.9252	2.1891	6.9531	32.9461	1.1407	2.4369	0.1396	27.4666	0.0176	7.1862	9.6551	15.816	2.6894	3.0961	102.01	52.3329	0.6786	26.5497	30.5442	15.1139	0	3.0064	8.1817	7.0934	19.8994	4.8821	48.7824	9.2924	0.9236	8.4317	5.4926	0.0973	45.8484	0.3253	24.4755	30.6782	3.5796
1f108190-3a84-4f4a-8d99-2621ccac226d	0.8973	0	4.1067	0	1.9126	2.6591	11.8547	31.5204	2.2659	0.5475	1.5402	4.0239	10.091	17.4118	23.8477	51.5055	0.5294	7.6904	0.2033	5.0681	0.982	16.5091	2.4788	7.0413	3.0938	3.4481	38.6634	183.627	0.3079	28.8009	10.004	3.1831	0.3708	2.7718	1.7927	1.7019	6.7296	25.0332	17.5858	21.6989	0.3589	4.2529	1.9983	0.2551	31.6701	0.1185	5.586	11.0919	1.3087
dd2da920-7ddf-4664-aac3-77d123a01bdf	0.0026	6.413	2.921	0.0112	0.0727	0.5958	1.3136	18.9375	5.9506	0.7563	0.8018	5.7626	6.8431	2.427	13.7656	48.588	0.051	4.4426	1.287	11.1672	1.7458	4.4318	11.5598	4.4653	2.6342	6.7958	5.8441	99.7417	0.0679	24.4279	12.9786	27.3528	0.3143	0.8318	6.4932	6.7713	9.0197	9.9526	52.035	14.1027	1.138	8.1649	0.879	4.6772	45.6044	0.1786	34.1898	7.9665	1.8865
32a463b4-1c84-483c-aac4-32abaffb79ff	0.4688	1.0617	0.2703	0.0392	1.0204	1.4241	0.7825	12.1613	0.1664	0.7236	0.9438	3.7327	2.6674	1.1722	9.7335	36.9885	17.3299	4.8637	0.8063	16.9888	2.758	9.0987	11.0679	7.706	2.6169	5.1213	25.4604	86.6177	1.1811	74.0071	3.5187	4.3176	0.0408	1.3011	10.1343	17.7732	27.9943	7.2676	88.128	24.533	0.6719	8.97	9.0984	0.5619	40.5873	0.9084	29.1902	21.1619	2.9329
bd588720-e890-4210-bf17-bc0ad7cf9471	1.2734	2.0398	2.1099	0.0143	1.7246	0.8038	1.5721	35.4889	1.8337	0.7034	2.5431	3.0585	4.8617	1.9791	10.5294	35.2188	0.2432	2.7555	0.3527	27.1748	1.8555	8.8554	14.0403	17.975	1.4458	5.9957	28.8152	80.1143	1.5123	25.8739	24.1766	6.4469	0.5508	0.8611	13.7337	1.348	18.7211	11.1898	101.78	26.6556	1.5057	13.0367	5.2874	0.4916	46.668	0.0457	24.4487	19.761	0.2193
4230c731-8700-4905-b66b-83536c8d0bb1	1.256	0.5176	0.3453	0	0.9934	2.1957	3.8185	13.534	0.1898	0.8048	2.3948	3.6045	1.2027	1.1128	10.9119	14.2144	2.5093	4.9225	4.8957	10.3757	1.6368	10.177	6.4678	5.4873	2.5627	5.0937	11.2163	42.6979	0.5236	56.3783	46.2521	8.9854	0.3499	1.0196	11.35	12.2247	7.5588	3.0249	46.9293	24.0546	1.9694	19.8007	2.5438	1.1148	34.1934	1.0875	26.2984	12.5411	4.0691
167b15d4-cb5c-44d0-a04a-e4e9576d1be3	0.6893	0.2905	0.819	0.0074	0.9651	0.2497	0.9062	40.9125	0.011	0.6691	1.1933	2.3406	0	0.4163	3.9448	12.809	0.2623	2.625	0.262	8.5397	0.1749	3.2621	21.4938	29.0321	1.3796	3.4727	8.3444	54.9545	0.4577	25.7719	9.594	8	0.0766	0.0805	7.5372	2.9195	8.3592	3.6201	81.6004	28.9427	0.7854	11.151	1.5966	2.0645	28.791	1.9846	48.2236	5.1046	1.8608
cba6ef52-dcf8-4b0d-b858-ac0e0ee76bfe	0.3059	0.0637	2.0986	0.0145	1.5608	1.308	1.5947	26.3124	0.0072	0.4281	1.875	4.0309	1.9727	0.73	12.3864	25.2384	3.1409	2.0379	0.0398	26.5661	0.225	3.4952	12.5073	14.6058	0.877	3.1069	37.0698	88.7717	0.6019	21.7256	2.6023	34.756	0.0302	0.9716	6.853	0.5041	11.4581	6.9158	82.5879	15.0275	0.8916	4.9884	3.8961	0.3325	26.1958	0.0463	20.0759	16.7975	1.5573
3c7b6176-c578-4d2d-bfdd-d2a2fed509a2	0.393	0.5304	0.1041	0	1.688	0.1061	0.9242	13.9755	0.0226	0.613	1.1973	2.2135	0	0.4277	15.3675	47.6821	0.5452	1.4439	1.3662	1.245	0.7732	5.6132	4.0918	10.8489	0.7558	2.9841	0.7701	115.466	0.7339	18.7025	8.6233	5.6917	0.3775	0.5254	4.8243	2.8743	8.0974	4.0514	24.5082	10.8349	0.5936	4.654	0.7668	0.1298	34.7005	0.6152	28.3439	3.6871	0.3475
d340b888-151f-443f-950b-f9e5555509fa	0.0589	1.1956	0.4042	0	0.996	1.2515	2.0509	30.3933	0.0878	1.6078	1.6013	5.251	1.7098	4.3896	10.2143	37.9374	0.219	3.6291	0.5168	14.3976	0.533	7.2478	8.7971	18.0574	0.5766	4.729	5.7943	86.4523	0.598	30.2042	5.2628	19.5857	0.1832	0.1377	11.4131	6.51	12.2692	8.2744	106.785	24.4811	1.3681	8.4369	3.5984	0.8644	34.4073	0.2209	29.7768	5.726	4.8687
7986dafe-0e82-47f4-8da3-1dc1575a0ac0	0.0221	0.0922	2.4952	0	1.9178	0.2213	5.0539	38.6912	0.0236	0.5035	2.3474	3.7924	0	0.2972	9.1688	31.4155	0.1568	1.9705	0.2158	14.0465	0.3093	17.0565	18.6958	24.9836	1.1161	3.5873	41.4167	118.981	0.2948	25.1525	3.7667	20.3094	0.1967	0.7809	9.304	5.5134	14.8408	1.7137	65.4955	18.7141	0.5077	9.1006	4.1851	0.4511	31.2144	0.1006	25.7605	12.883	3.2
44200349-38ca-4d9c-9298-67723293e72c	0.3636	4.9601	4.2731	0.1482	4.6991	6.3893	1.0895	20.0921	0.2305	0.7716	2.3846	10.0103	5.9262	21.8492	16.2486	28.8249	0.3181	7.9422	0.1911	16.4593	4.1271	16.4861	11.4688	7.0916	4.1244	8.9641	11.0894	169.565	0.6174	36.5067	185.019	47.1268	0.2359	11.0803	17.1996	4.0055	10.1444	45.7301	45.6936	18.4505	1.1767	8.4816	2.5375	0.8489	43.1125	0.1253	42.1672	18.1173	1.9047
b48ec0d3-a63b-4f93-b8ca-14875377724a	0.4503	3.1792	0.5516	0.1221	1.4875	1.5626	1.0072	43.1267	0.5745	0.9001	1.784	3.3001	5.1846	0.9354	2.1561	37.1532	0.0506	1.5102	6.9371	11.8777	2.8144	5.3055	13.8542	10.1655	0.5881	2.6545	25.1544	78.528	1.1845	24.9298	3.772	1.1297	0.3493	0.9969	27.6411	9.4131	20.076	2.8449	108.485	19.7607	0.6914	35.8624	4.6711	2.1844	32.7131	0	21.4805	10.5164	0.6432
fdf2cc9f-9399-4e7f-9fac-309cf00d928b	0.7651	1.1838	3.7162	0.4119	4.4478	9.1098	1.1075	11.2359	1.1899	0.5237	2.9866	12.7182	9.6522	23.0397	17.9183	19.0052	0.2238	5.7649	0.1945	10.0319	7.1329	13.0101	4.1653	3.6571	3.3439	9.3037	16.4025	123.694	0.668	24.6605	183.123	22.7947	0.1773	12.3603	11.0356	3.7738	7.8608	51.3466	44.3569	16.2796	1.1728	8.7801	2.1415	1.6267	35.6163	0.0453	12.2068	11.1061	2.3403
e3fb8ce3-dc67-4f02-9e0b-41c2181ef0de	0.4433	13.8367	4.4453	0.2476	2.9367	1.532	1.3008	13.526	0.5425	1.0651	2.902	7.3089	0	8.3963	15.5324	24.7502	10.464	11.0064	0.4602	13.5595	4.1855	12.4998	6.6435	3.6814	3.6484	8.7097	3.8391	206.904	0.5188	43.0049	128.536	73.013	0.3497	8.9544	12.4639	8.616	7.2404	46.9042	33.359	24.0098	1.1578	9.0871	1.6326	1.3168	38.0602	0.8893	40.5376	11.8818	4.4395
f88b3d7d-3895-4050-b370-656d0919bd8f	1.2403	2.8214	0.6627	0.0563	1.6644	2.8848	1.2729	25.6262	1.2362	2.4925	1.089	4.0301	0	15.8954	5.8618	17.1224	3.8888	3.6094	15.8929	4.1247	3.6676	8.9389	16.3309	7.676	1.0858	3.2706	12.8115	47.7449	1.0969	27.3178	4.5914	6.9321	0.4983	1.1513	5.1181	6.9218	9.8541	4.4497	51.9725	12.4855	0.8368	13.5305	5.3785	1.2905	32.2703	0.3822	16.9547	8.7013	2.4827
8d63fcda-9ae7-45ad-a94e-beb5859004ee	0.7288	1.2968	0.9999	0.5601	5.7367	4.7349	3.9017	24.6688	2.6071	1.0326	1.2471	10.947	4.2295	11.7393	5.8599	33.8481	0.1419	2.3041	5.9661	9.1302	6.4312	19.9253	9.0558	5.3083	2.8528	4.5429	14.063	107.171	0.8184	27.06	13.2724	10.7082	0.1943	5.1678	15.214	0.2027	18.2626	19.0587	35.4209	20.6358	1.0028	36.3012	5.4375	1.3365	32.2481	0.1242	23.2779	9.8254	2.3253
a5a4ab05-88ff-4512-be4e-4fb65c4c3db7	1.0374	5.4275	0.5821	0	2.9973	0.4924	1.776	27.1207	1.0181	0.3345	1.75	3.1655	3.3633	4.0063	2.4332	33.8312	1.8569	1.8227	0.1694	8.9789	2.1607	10.4424	17.7516	4.407	2.1396	2.9948	10.6499	82.6769	0.8635	28.7801	18.7556	7.2065	0.4377	1.7202	12.1869	13.8481	13.7214	14.3224	77.2812	23.6504	1.3706	29.0587	5.5966	0.9919	54.7655	0.2962	31.758	15.6452	1.4224
43ae985c-ff38-4640-8fe3-10fe00c6b322	0.5427	1.5424	5.1994	0.1383	6.1919	14.7349	2.5589	23.3704	1.2246	0.5526	3.408	13.331	11.752	19.5167	16.6616	39.4009	0.3728	10.6812	2.3682	17.8187	4.4316	8.3289	8.9335	6.8274	5.0082	9.6665	22.6211	158.253	0.997	40.4742	325.749	15.3157	0.5038	29.4528	20.4439	8.0633	13.3631	54.8141	60.0958	17.3061	1.5847	9.6995	4.9468	0.5942	41.6669	0.276	39.4328	36.151	1.9217
dc5a3457-e098-4572-86c7-d58e6ecef772	0.2135	0.3517	0.3778	0	0.9875	0.8002	0.5497	19.1974	0.0126	3.361	0.4895	2.536	0	1.3533	10.8835	13.3262	1.0183	2.2927	2.4621	10.5377	1.3214	5.4141	9.0827	5.8681	1.0552	3.8212	19.4886	33.086	0.9285	35.8778	4.4026	2.482	0.3425	0.7579	7.6733	4.0457	13.2743	4.492	43.0534	9.1633	0.4208	7.2376	2.3372	0.2175	11.5812	1.2933	26.3063	13.2485	0.3881
68486f51-6fd8-44b8-a643-5283ff70c38c	0.4141	0.8116	2.4298	0	2.4049	5.3413	0.6375	13.4839	0.0615	0.4547	1.8996	9.1691	0	11.1799	14.9245	23.4813	0.4261	5.5362	0.7882	8.3664	0.9134	8.9291	2.365	2.4259	1.4134	5.7065	11.359	182.41	0.4782	21.6996	266.267	17.8872	0.1711	8.9579	10.1239	3.6234	8.3289	30.0242	24.9767	14.6639	0.4761	4.4158	1.4918	0	21.2339	0.0656	24.4486	11.2003	2.9934
84bed714-c86c-47a1-af1d-b72840273a9b	0.0061	0.8651	3.4244	0	2.3125	1.8643	5.6626	28.8222	1.7734	0.5912	1.1954	3.053	2.6508	10.1372	9.9305	28.6636	0.0485	2.125	0.2493	14.5246	0.1545	12.4808	24.8146	28.1502	2.1808	4.4602	19.0605	59.6616	0.4965	20.4849	1.4129	19.5015	0.1623	1.699	9.8695	0.35	23.476	4.6467	127.657	18.3252	3.3323	9.0619	6.5914	0.3351	46.1085	0.4773	39.6011	16.1745	2.4414
66330a7d-9744-4d05-9ec6-787ccb3b0f47	0.4441	1.213	4.488	0.0198	2.1941	1.1559	18.7793	10.4169	0.0985	0.6797	1.341	3.2581	0	4.8433	9.8696	14.9272	7.6482	2.243	0.2705	7.1244	2.388	10.5356	2.8962	3.0091	1.9753	4.7809	33.5937	77.0165	0.2098	29.5376	4.6146	20.1118	0.2055	1.4112	8.9484	0.0343	4.744	10.9462	16.8619	10.8752	1.5713	9.1694	1.4473	0.4524	36.002	0.4729	18.919	6.8744	0.7569
fc2dab28-c31b-40cb-b0d3-223016540d64	0.5276	0.8489	1.7589	0.476	0.7821	0.8562	0.5144	2.2581	0.9265	0.371	1.5766	2.912	3.1563	0.9125	5.8306	6.6908	0.1444	1.3096	0.0636	4.3131	0.5279	14.5295	2.8551	5.0326	2.5885	2.8105	3.5206	22.3384	0.2231	11.1851	1.2617	45.4733	0.1933	0.2915	5.0382	2.1676	5.6017	7.4871	25.5414	7.76	0.6899	5.2517	2.1025	0.266	15.3094	0.4818	10.9199	5.6028	0.8009
b5c1b64f-e2ef-4e89-84d1-0de8171ee3e6	0.3164	1.5023	2.6488	0	2.2619	5.8479	0.9977	14.9844	1.0809	0.4151	2.5481	9.2388	3.8258	18.583	28.8789	38.0671	0.2451	6.8897	1.7346	28.11	4.683	7.127	4.9529	4.1674	4.8677	7.5372	23.296	132.996	0.3559	22.3866	252.423	20.9403	0.0879	8.9143	10.8513	5.0471	10.0234	31.0166	22.6758	8.9675	1.5165	4.9884	2.8658	0.3224	27.4745	0.1123	14.6211	42.6198	1.1865
0ee88d9c-2f83-4a34-aff5-c94e27a83c8d	0.2521	0.888	1.2196	0.0414	0.7829	0.8724	0.8439	17.0607	0.4749	0.441	1.0412	3.0666	1.876	1.0848	37.9919	19.6936	0.309	4.8503	0.378	2.9127	1.9682	2.454	4.7016	2.3989	12.6245	3.0694	9.0561	38.4822	0.5445	21.7154	4.9495	3.9709	0.5745	0.4709	6.9955	2.2411	5.2752	3.1454	37.9484	4.6361	0.6533	67.4513	1.9741	1.1066	22.2633	0.3525	24.0044	4.8037	1.9041
de2ca9be-10dc-47dd-9101-44dc02b2bdce	0.0902	0.3583	0.7633	0.0175	0.6412	2.151	0.9771	16.8464	0.0524	1.1616	0.9573	5.0083	0	1.1005	8.3238	20.3146	1.8286	1.8802	0.1918	20.1646	0.4522	4.018	6.0806	6.8728	3.5009	2.7538	28.754	60.7749	0.655	26.6038	39.4658	5.4305	0.2185	1.0703	3.4313	0.7143	12.904	6.4817	81.5369	17.2739	0.8989	9.1907	3.601	0.4009	32.8012	0.0838	19.0442	19.512	2.4146
f130c71b-1629-4674-92a0-c767dfb4eeee	0.0851	0.0419	0.5046	0.0096	0.8472	1.3984	0.8131	3.6547	0.0095	0.3759	1.0095	3.2821	1.2991	3.2753	11.7335	10.3237	0.3329	1.6208	0.3142	7.482	0.5432	4.1519	1.5094	1.6408	1.8919	3.1161	14.111	31.5176	0.1257	14.4181	80.0295	23.5228	0.1392	1.8458	4.6389	3.129	7.506	12.3765	11.6235	9.3009	1.338	4.962	1.0977	0.6021	19.5549	0.3661	10.3448	6.9512	1.4651
47be8b73-b6ea-4e17-8e0c-c14c7ff02122	0.1621	0.484	0.6388	0.015	0.3022	1.303	1.2398	16.8607	0.0825	1.1094	1.1633	2.1018	4.0896	1.4189	7.2942	20.6223	53.49	2.528	1.5658	10.5777	0.7462	4.5372	9.9441	5.1004	4.984	1.8777	10.6938	48.9112	0.563	27.6186	5.9671	18.6288	0.3757	1.4913	8.2546	5.2515	13.1968	4.5584	201.477	10.0027	0.8939	7.6665	3.6358	1.0339	24.67	0.1921	20.723	10.3236	2.1331
19445b77-3101-4b30-8e4e-87766610c0d0	0.7861	5.2685	0.9629	0.0494	2.3136	1.8101	1.1808	6.3992	1.5097	1.2941	0.8843	2.8246	0	4.4998	38.4291	22.3506	0.3138	3.4841	0.3605	11.2132	0.561	3.8139	10.2808	14.9328	3.0851	3.9699	25.8696	40.6239	1.0401	36.3243	1.4303	15.8011	0.3081	0.593	8.2207	0.6857	16.2185	3.4937	68.0543	8.9447	1.4248	8.9729	4.5904	1.6017	37.2927	0.2101	19.8532	21.5916	1.7022
0fca7b43-2810-4fcf-bd1c-f9f9da366038	0.1577	0.3909	1.977	0.0099	1.0647	0.5331	6.5009	4.2427	0.0099	0.292	0.4388	0.8999	1.3457	1.0272	6.9619	7.725	0.1149	1.0104	0.6508	4.8932	0.2251	2.0501	1.4071	2.4432	0.5776	2.0146	10.1875	24.4984	0.1953	23.0165	2.1518	19.5209	0.0206	0.1402	2.947	2.1837	7.1755	2.2051	10.1349	3.7029	0.8974	1.9969	1.0743	0	13.8279	0.2212	7.3921	10.5109	1.0244
08df322c-7c0e-44a0-9dab-fb371cb31efb	7.8985	0.8208	18.539	1.0187	2.113	16.5234	6.8533	22.3416	0.6325	3.1684	2.1958	7.1741	2.8259	6.0787	14.7993	3.9017	0.8102	1.6112	1.4236	9.8499	11.5372	3.1352	26.3593	12.3129	4.5485	2.3905	15.192	10.2675	5.8989	31.542	1.3556	5.3659	0.8653	6.5978	9.0963	12.4748	50.0234	8.9917	361.267	6.6957	6.2603	18.2371	10.8696	1.5478	19.5283	1.9247	47.8916	11.5494	1.9918
0b996a43-9c25-4313-971d-687f0ff7e133	0.5494	1.2616	1.578	0.1213	1.0036	3.6922	0.4778	13.9972	1.042	0.5302	0.9915	6.2173	1.8323	15.0449	19.7583	47.5992	12.3402	8.6473	0.6277	11.3361	2.0478	14.3207	1.2164	2.4009	3.0615	5.6593	57.1363	138.902	0.1909	24.709	573.144	35.9896	0.1683	3.4796	2.6589	3.6755	5.8562	35.0156	15.1377	10.2701	0.448	4.2151	1.5577	0.4632	35.4294	0.4518	3.784	25.2623	1.9114
3ccd1b19-cc16-4ad2-9dab-8b900cf6a5a1	0.357	2.2619	3.6157	0.0341	2.863	6.4302	4.092	18.9337	0.9132	1.2581	2.5848	9.2854	9.2759	3.5043	15.9113	42.6791	0.3395	5.0357	2.3365	19.84	0.6347	20.6589	7.1846	4.1246	7.868	4.1126	76.0727	97.4798	1.6912	31.428	17.4895	11.1166	0.3787	2.9798	18.2195	23.5159	13.1132	39.5299	68.1118	33.6767	1.3058	15.4475	3.967	0.8468	82.6255	1.6521	23.3697	14.2445	0.4359
3e40f0b9-3326-43b1-9fb3-0e6479955cb9	0.0522	0.5511	2.8996	0	0.7591	2.1955	0.5161	3.5008	0.0128	1.6	0.6865	2.4508	0	0.9155	5.8848	6.5342	0.0355	1.6101	0.0469	2.9419	1.1683	5.3976	0.9468	0.4411	1.8559	0.8617	12.1551	49.6557	0.0476	9.8073	27.3172	12.3089	0.1426	0.6671	4.9657	0.238	5.0088	4.9685	6.5668	3.6778	0.4571	2.7905	0.8087	0.3433	9.994	0.2187	6.6673	4.0875	2.035
2a574561-0470-489d-9f5d-178dd4da74c5	0.0278	0	0.3814	0.0119	1.8938	0.653	0.6942	13.5776	0	0.9337	1.2873	1.8982	3.2269	0.6344	9.749	19.25	0.1476	5.5924	0.2276	3.6682	0.4907	10.6332	1.0176	3.4641	1.0882	2.4693	8.8804	69.3081	0.3542	37.1304	3.8053	21.7971	0.1235	0.4355	6.201	4.9579	6.6939	3.3815	25.4322	13.4419	0.4184	6.2616	1.9822	2.2433	43.1419	0.0379	13.6375	5.9717	0.6823
f7209da3-722b-4ac3-b957-ecb7402c5121	0.2233	1.8506	1.3629	0	0.2254	0.2029	2.7959	10.515	0.8084	0.4688	0.9727	1.532	7.0693	0.1363	4.2672	21.7137	0.1006	0.8647	1.8282	5.5441	0.4837	3.3947	4.8497	2.1018	1.192	1.9212	1.9677	54.0458	0.0526	12.3634	371.94	16.5408	0.1984	0.1786	2.8496	7.8356	9.6316	8.1938	17.9418	5.7635	0.7333	10.7175	2.1133	0.9928	17.6378	1.3421	29.7508	2.4768	2.4914
6399dc78-5784-490f-a20d-998554980012	0.0745	1.4177	8.6457	0	0.8452	2.0463	11.9288	20.1703	2.2669	0.7423	2.398	2.9428	0	5.7962	9.2395	22.4838	0.6194	2.1464	0.4353	21.6826	1.2318	8.4422	9.1073	7.0937	1.4571	3.8352	31.4307	55.4342	0.5386	27.7342	8.204	24.7691	0.1985	0.7162	10.3737	1.2559	14.4068	7.6147	34.4263	16.6218	1.9527	8.7822	3.8523	0.5461	32.304	0.2537	16.0979	24.3495	0.67
805acd45-677a-4d84-8281-0c40bf4996d0	0.595	0.6681	1.6674	0.0183	0.6695	3.4867	1.9676	30.7233	0.6425	0.5166	2.8349	8.1981	2.484	7.067	4.4079	19.6463	0.2046	2.0544	0.2753	37.4865	0.9443	9.7896	9.5651	2.1568	1.2376	5.6748	9.8718	99.1381	0.3882	21.7567	5.809	16.9211	0.0761	1.6705	22.6004	4.856	11.8709	9.2765	27.8277	10.6323	1.5184	5.8344	2.4209	0.628	23.5063	0.0292	28.2152	6.4025	1.1556
f33c4f00-b105-4e5f-adae-a10fac9547ca	0.8871	1.3471	0.5139	0	1.6179	1.7522	1.5873	49.599	0.6317	1.0064	1.3513	3.8982	0	2.4135	5.7368	47.5538	31.8598	8.561	32.3464	19.3012	3.0543	6.3355	39.0829	30.6398	1.7862	4.9651	25.0272	63.7142	0.3559	33.269	10.7062	3.3203	0.3728	2.4544	16.6717	18.9208	24.2113	9.3774	114.878	24.9456	1.8941	9.6964	9.7365	0.806	36.5965	0.6535	28.2885	34.1482	1.6181
9da2fda3-2abd-405d-b918-9808b580f849	0.1431	2.3271	0.8474	0.0764	0.7523	3.949	3.2491	26.5653	1.4984	0.3442	1.4407	3.1288	0	1.8812	6.3698	36.1641	0.2006	0.8792	0.5928	17.9034	0.3684	11.2901	7.2092	4.8355	1.9365	5.6532	14.4927	68.5731	0.8113	30.2952	5.465	7.7928	0.106	1.4588	8.2642	5.2181	13.9071	4.5501	52.7303	9.4351	2.1796	10.9248	1.9197	0.3646	26.0476	0.3455	20.6324	15.8286	1.4149
b1b2c2c2-0b5d-4948-b019-8f27dd1e4d6a	0.1273	0.8182	3.3024	0.032	1.4169	0.4678	6.5589	61.6034	1.3873	0.5501	0.9799	2.395	0	2.6135	6.6242	32.2684	0.1723	1.2757	2.5397	6.5412	0.3469	9.0314	11.2885	16.7404	0.7661	2.2493	14.5956	85.2834	0.4932	27.0898	8.0783	21.9606	0.0333	0.2264	5.2554	4.4006	10.3509	6.4587	38.752	14.4494	1.0143	6.2389	2.4669	0.3662	21.6504	0.1021	19.7546	8.6257	7.8418
28280645-b34f-4b0e-8551-4f747f77f299	0.0127	1.5088	2.2749	0.0543	0.2728	3.1465	2.8152	12.2626	0.6703	0.2336	0.3073	2.491	5.5362	1.75	4.0387	18.7773	0.0675	1.7814	3.7187	3.8448	0.6033	1.6501	4.625	3.7582	2.5743	0.6162	4.398	40.23	0.1167	43.2127	3.9836	5.5913	0.4238	0.7516	7.6281	2.4522	6.9757	3.5513	31.771	6.7704	0.8067	2.787	3.4534	0.4665	21.7491	0.3467	24.7527	8.3366	3.538
f2f8e7bc-0133-4a21-bf58-10cb27b39755	0.4342	0.9159	0.115	0	0.1925	0.6158	0.9879	15.5262	0.4436	0.5235	0.378	2.3827	0	0.3938	6.5387	16.3031	0.1039	1.3169	0.1372	18.3981	0.4919	5.1596	6.1043	7.6609	0.8613	1.7151	7.2648	28.5481	0.2788	14.7416	10.2098	6.8726	0.1825	0.0645	2.7853	2.045	6.5671	2.5629	24.0052	9.804	2.7628	7.8489	1.4829	0.3587	15.1483	0.02	14.7182	7.5682	0.9601
abdbb7e1-f768-48ad-b3fb-a357f746d8fc	0.0289	1.5178	8.0052	0	4.4539	6.6387	6.9694	20.4883	0.0894	0.8049	2.2431	5.9487	2.5193	18.6859	5.7315	24.009	0.3074	3.1147	0.3215	23.2374	1.3535	12.8212	11.9591	5.3826	1.3903	4.9587	23.3258	132.156	0.3968	22.9259	3.1892	17.7498	0.09	2.3504	11.0195	0.338	11.2783	24.673	90.1819	18.5501	1.3689	6.2897	4.0225	1.0615	52.409	1.8737	34.2931	10.7333	2.8175
75764a3e-29a0-4d07-a262-5524c58fa779	1.33	4.7356	3.2583	0.0437	0.9881	2.0596	1.9076	17.1955	0.5601	1.7639	1.5475	7.3838	0	6.4737	12.947	20.2194	0.4864	5.2237	5.4349	14.6873	5.4616	12.8084	20.2287	6.7751	3.6404	3.6722	15.0333	45.9992	1.0793	49.4397	6.8148	3.9426	0.5974	1.7633	7.3623	14.9113	14.4793	8.4193	60.8602	14.413	2.036	37.1009	3.7899	2.5014	34.888	0.7071	31.7091	10.8828	3.7064
bdb1b32b-f903-4ff5-adc5-1adbd42f0018	0.0547	0.7174	0.3217	0	0.5522	0.1094	0.3312	13.7847	0.0117	0.1723	0.4626	1.0618	0	0.1469	5.3458	13.2722	0.1162	0.8425	0.6399	1.7609	0.4828	1.1568	2.2136	1.3034	1.3143	0.7599	3.4839	31.1273	0.3427	11.2193	3.1735	3.4267	0.0972	0.1053	2.4576	1.7041	6.3433	1.1496	13.6554	10.3556	0.0235	9.0336	0.4774	0.4014	12.5096	0.261	12.3722	3.3377	0.4476
cb3d7da5-bd29-44c6-8308-d40fbafa83d7	0.3694	0.4492	0.5876	0	1.0529	0.6832	1.7332	10.3972	0.0051	0.4783	1.3809	2.9994	0	2.4469	6.289	51.9844	0.2038	3.9368	0.8415	24.0933	0.582	9.5654	9.9573	10.328	1.6857	2.9824	18.2751	62.059	0.4713	28.4297	8.736	3.5963	0.2344	0.4285	2.5096	5.1665	22.0519	5.4368	49.4379	29.5412	1.9286	5.1698	2.2729	0.4105	55.1782	0.2288	41.2528	11.1755	4.6308
2033eb4f-f07f-4810-91fc-850f085d1da4	1.8476	0.4316	0.739	0	5.327	7.0662	8.1312	10.8786	0.2409	1.1871	1.8217	5.8712	0	6.4108	20.6755	20.1687	28.9892	6.7322	3.2336	12.1917	2.9945	13.4668	3.9345	2.5908	3.8575	4.2622	25.5633	41.5462	1.1399	37.0692	148.702	66.0328	1.4518	4.6114	8.7883	9.9252	8.6861	11.3263	20.8465	11.8932	1.5672	14.5377	1.9094	0.7683	33.8223	4.2826	21.8186	15.8838	3.1875
56100ec7-8a17-496d-8617-31b42f45c161	0.0066	1.7073	1.7435	0.0141	1.8951	0.4446	0.6108	13.2615	0.0351	0.5878	0.3051	3.1728	3.824	3.5821	12.7535	27.6614	3.1959	2.7632	0.4238	11.5112	1.2211	6.7753	1.5867	3.6825	2.0517	2.5538	55.1119	59.8449	0.5051	13.4296	70.623	27.0803	0	2.9338	2.3037	2.2842	11.0762	8.1967	14.2267	9.84	0.3683	3.408	1.8039	0.0806	31.5726	0.3817	4.4778	30.0065	1.3477
0a540449-152b-4a8a-b4c1-73d9a8a712da	0.0358	0.0373	0.7801	0.0085	0.0803	0.3879	1.5209	38.035	0.0169	0.2297	0.7131	3.4611	0	0.187	8.581	41.606	4.9529	1.1735	0.1396	7.5203	0.2898	2.9451	15.8139	14.9322	1.1153	4.0749	19.7595	50.1789	0.3352	36.0376	2.7239	40.5397	0.0707	0.4922	6.2365	3.844	15.741	0.9242	48.803	7.2972	0.6674	9.7145	4.7655	0.2433	34.5017	4.2992	25.1049	16.0263	2.0839
2672526a-2900-49fa-98e2-b244cba046a8	0.999	1.3211	2.0226	0.0296	0.6476	2.0456	0.794	13.5475	0.0259	2.3663	2.0809	3.2159	3.0196	1.4667	7.0664	13.4666	0.0921	2.7899	0.2637	24.7577	2.334	7.0335	5.0285	7.6907	4.7523	2.3863	9.8406	40.8754	0.9213	36.1068	1.4887	2.2559	1.2021	1.0725	4.913	3.1894	11.4761	5.5423	20.8459	13.0272	1.2603	11.5685	2.0714	0.8482	21.5937	0.6383	17.8081	6.5223	3.0081
b5584f3f-9c14-4dbf-8981-7529d9cc9e48	0.1573	0.0648	2.057	0.019	0.8683	1.2825	1.0607	17.7254	0.2622	0.6072	1.093	6.6526	0	6.4117	8.4647	31.5246	0.583	2.6146	0.052	11.7027	0.3273	2.8083	7.2872	11.1308	0.3299	3.4064	28.9023	137.14	0.2242	21.2733	30.1123	26.7713	0.0132	3.1148	8.6995	2.0239	11.284	13.3355	104.333	10.5719	0.6251	2.2374	2.459	0.0725	26.0435	0.0404	21.5182	7.9755	0.4612
df8bd4f7-b06d-4345-9ec3-aed43752ed0e	0.511	0.8828	0.0699	0.0051	1.7447	0.19	0.7418	36.774	0.3239	1.0475	0.5549	0.5807	0	0.6061	6.8837	42.0107	0.0168	1.8335	6.1696	0.9068	1.1691	11.053	11.3535	5.2362	0.6765	2.9549	2.9968	55.5632	0.3336	16.8642	2.5911	10.7325	0.2217	0.2319	5.6522	5.1278	8.1483	0.946	28.2357	4.0583	0.6131	3.8326	1.9196	1.5108	25.6938	0.0729	36.5272	9.4957	1.672
521eafe4-01bf-4aa8-ae7e-0587e2fb99fd	0.7123	1.7943	0.7959	0	0.7251	1.124	2.0801	30.0721	1.5033	1.5081	1.5847	3.5472	0	0.1677	22.9474	40.9192	2.0128	3.889	4.676	9.6507	0.9097	12.2478	13.6003	8.8148	1.9453	5.3068	34.321	44.7354	0.8499	25.3514	15.9433	23.8519	0.0555	0.6525	11.2883	33.4012	11.1985	4.4213	62.5311	21.893	1.6118	18.6555	4.5861	1.0693	45.2311	4.8964	15.8249	32.7384	2.1467
b8fd6ee1-e7c8-4c43-aaa7-bbfbfde16cd2	1.6871	2.7357	0.4984	0.0401	5.5115	13.3422	2.019	16.3204	0.863	1.8559	2.6337	22.1563	1.8164	19.3886	22.6652	34.8033	1.1247	5.2858	8.2171	16.5184	6.7666	13.6098	13.9581	6.3801	6.1117	10.0377	13.4625	133.502	1.2064	55.204	67.6718	7.1053	0.3476	11.0579	16.5257	10.6813	12.5039	37.4802	51.5986	31.8616	1.6418	17.7664	2.434	1.9132	58.6454	0.2346	32.9483	13.1612	3.1494
7e3073c9-e3d4-4a08-89b4-24528e04804e	1.0979	0.1025	0.2644	0	0.58	3.728	1.9614	15.4841	0.1498	0.4924	1.5678	3.7764	2.7227	1.7633	6.8445	22.7087	0.4402	4.1423	0.192	19.7569	2.9187	5.8611	12.4273	5.6308	4.2781	5.5761	35.3403	46.6806	0.8561	17.7229	18.5573	10.0998	1.0005	2.3661	11.063	9.3058	12.5722	10.2716	33.2493	13.2841	1.2406	13.9972	2.7805	0.6883	26.0777	0.1439	17.6224	26.5178	3.4927
38b48a78-a757-4def-b7fb-1cdf9ffba379	0.0152	2.3953	8.2083	0	0.8625	1.0631	0.7329	22.7212	2.0221	0.598	1.5906	3.003	4.4089	5.3028	11.5749	34.3574	0.0941	2.7129	2.2655	38.1746	1.609	6.5706	12.623	13.503	1.3179	4.343	25.261	61.8239	0.4101	22.1498	2.6437	48.744	0.27	2.5995	6.6113	4.1264	12.0592	6.5103	47.366	12.974	1.47	4.3938	4.9367	0.4644	29.6717	0.3624	22.2001	18.6479	1.4917
08dcd1d8-a3b5-48c4-ab8f-a5016daf63d3	0.4048	0.1623	2.1383	0	0.3467	0.3805	1.2998	40.563	0.004	2.1633	0.6953	5.552	0	1.5704	12.2931	30.9565	0.881	1.4662	0.1737	2.5185	1.0652	5.425	9.2298	13.2195	0.1652	4.3903	0.6569	93.3642	0.5173	17.9178	7.2376	6.4187	0	0.4389	3.1468	0.0826	10.7309	4.579	45.7763	16.6941	0.2316	8.592	2	0	30.1259	0.1266	36.7809	4.513	2.2485
5e35fd9e-7279-4595-bdb3-27d21e4ba5fa	0.0555	0.2666	1.6844	0.0365	0.4956	0.2988	1.0906	21.8467	0.3273	0.5378	1.2637	1.5345	0	1.4903	5.3278	19.34	0.189	1.0283	0.1498	11.6123	0.0659	3.4471	2.7559	2.7973	0.5129	4.9168	2.8776	74.7073	0.3135	13.2654	5.3001	27.103	0.1518	0.3462	3.3674	0.1979	13.195	19.1943	12.8035	10.4496	1.983	5.6358	1.0984	0.5743	28.2921	0.1746	38.3853	5.376	0.7336
434c3a27-af20-4682-85e8-22d3cd435d9d	0.2351	0.0611	1.5037	0.0976	0.8895	0.8158	5.126	25.4094	0.8412	0.7881	1.3013	1.8301	0	3.9441	8.0775	19.1362	0.3236	1.4439	0.2673	7.9398	0.2017	19.3573	5.0943	8.4647	0.9294	2.9629	10.2087	43.8851	0.2185	20.223	2.4236	13.8204	0.029	0.1077	7.5484	0.1937	11.9948	2.4187	31.3489	8.013	0.5755	4.5249	2.2786	1.1176	24.631	0.0222	18.7978	9.8938	1.1752
a487aa03-258a-4bda-87f8-ded765f8a347	8.1602	1.2118	3.2097	0.0518	12.874	5.456	10.2498	7.512	5.5878	0.8487	3.2885	7.2069	9.3864	2.8224	4.6765	9.9488	7.2722	8.4914	11.3961	13.0496	4.032	10.6857	18.9675	7.298	6.7987	6.1771	21.8837	18.2066	6.6622	35.2799	4.315	5.7219	2.8384	7.2346	11.3715	23.2964	27.6927	17.303	81.7008	16.3216	2.2602	50.3149	12.5172	0.0989	33.3568	8.4047	32.6744	24.7308	2.3817
f3c46fae-d18c-46e3-875a-3476c55e44b2	0.7707	2.4757	0.22	0	0.7173	0.0935	1.2455	33.0645	0.7567	0.7852	0.9941	1.9626	0	3.8665	8.4852	31.7997	10.6086	3.2601	6.5185	4.7983	1.7826	2.3367	15.5664	11.4131	2.1632	4.857	61.4929	34.7567	0.6624	44.3185	123.236	8.6728	0.1662	0.5449	7.4847	9.1539	10.0747	4.8397	71.3035	12.7218	0.6595	10.2173	5.5596	0.0915	22.5575	1.0963	25.4685	17.9643	2.4484
740e8cdf-fafd-4dd6-82a0-ec387b20a37e	0.0808	0.4656	0.0761	0	0.2509	0.2485	0.2351	1.4869	0.1191	0.6196	0.6506	3.0818	0	0.0834	30.2191	13.1122	0.154	2.2803	0.2544	1.5714	3.5098	6.6589	0.9877	2.4483	0.6082	5.1885	5.6387	56.8527	0.3154	8.8778	18.8148	11.3952	0.0552	0.5466	2.1728	2.0046	5.4588	2.7831	9.0993	4.7782	0.6814	6.856	0.9255	0.3039	18.6186	0.0424	12.4012	6.009	1.8303
050131af-3dbe-4243-afb4-3d244b3c811f	1.2273	2.2986	1.0452	0.0125	3.8332	12.4996	0.8291	22.6179	0.1555	1.012	1.3058	7.0978	0	6.746	25.2448	31.4288	1.1586	9.4961	6.629	12.3046	2.3463	11.5124	12.862	8.727	4.9649	8.7575	9.4985	102.107	0.8202	33.8061	34.6385	3.9061	0.4154	3.2604	9.7683	5.709	11.1261	22.2284	67.7483	28.9458	0.3267	12.194	1.2131	0	45.5643	1.6926	27.6908	9.9831	2.5338
61aa0f4b-7a2f-4261-beee-2a86e607ca98	0.7458	4.3529	4.6163	0.2167	1.6699	2.3486	1.3106	19.1282	1.2356	1.0652	2.6028	7.3575	0	3.1097	9.9856	23.8088	23.5976	3.3322	1.4449	21.2602	3.0372	19.379	8.4795	9.2175	3.062	5.8859	8.2571	99.0053	0.8481	48.8938	69.3556	81.1632	0.3137	4.6692	15.1011	12.7035	13.0643	24.2499	65.901	29.882	1.2523	13.8171	2.3364	0.5395	36.8016	0.4812	30.8869	9.7575	3.3573
eb483e7a-fe23-4b42-8317-00ae6a590a42	0.6945	0.4796	0.9184	0	0.9302	0.9367	0.9998	19.2873	0.0327	0.6127	0.9773	4.8582	1.7832	3.0108	18.9205	23.0816	1.5882	1.7818	0.5031	7.7834	0.6372	12.1358	5.3865	5.7146	0.6014	4.1978	9.4451	73.9677	0.2057	24.9551	17.3217	44.073	0.0819	1.6805	2.8229	3.4403	11.0424	15.4588	25.1131	9.2226	0.7134	4.4466	1.1555	0.1503	22.2159	1.6333	17.2742	11.1561	2.3126
f9131fd7-55e6-49d0-9de0-fd7ba1930a08	0.9445	3.0285	0.9424	1.0036	1.8114	2.1251	1.8595	50.1646	0.2821	0.4934	1.867	3.6704	0	0.9179	4.1924	21.4028	23.4447	2.1002	0.7497	15.5905	0.5468	3.1213	24.3906	17.8547	1.0456	1.0835	28.6704	66.1784	0.6922	31.4074	2.4787	18.5679	0.0759	0.9984	12.3353	8.4216	14.7682	6.7104	146.285	11.8166	1.0199	12.4239	4.8086	0.418	26.8086	0.233	27.5118	17.0216	1.7482
5e4c8011-ce02-45d1-ad28-0cdb5298e770	0.0855	2.3776	0.019	0	0.2745	0.2913	1.3085	9.0241	2.3168	0.1631	0.5789	2.0946	9.0207	1.0954	21.8558	12.3025	1.4996	0.5474	1.2724	3.9303	0.6001	1.1576	2.6575	1.9581	1.9705	1.0668	17.2372	40.2862	0.0923	12.4662	4.2371	22.3469	0	0.1175	4.7006	3.5874	10.8464	4.2968	37.246	4.9987	1.3033	37.3648	1.4613	0.6651	21.8032	0.1589	16.0367	7.023	0.6994
7cacddb5-48c3-4174-8674-9c0e74c9b6ad	0.3299	1.6622	3.857	0.1853	1.6938	1.8078	3.5693	6.1909	1.5467	0.3341	1.6312	4.1804	3.3589	2.8357	17.2927	9.1745	1.8647	3.0149	0.2707	5.6809	2.1196	7.314	1.784	2.7309	3.2181	3.6638	4.5758	45.5112	1.2623	16.4115	14.0315	15.9102	0.3086	2.3861	6.4252	2.1995	5.1614	15.6796	17.5938	8.0871	1.1075	6.6653	0.888	0.3538	12.7086	0.2169	11.0131	5.1268	3.5513
34617c0d-8d37-40de-a208-660a73cfc4cb	0.1674	0.7683	3.6299	0.6935	0.5216	0.6888	0.6704	5.2997	1.4149	0.3874	0.5747	1.6273	12.8546	8.4902	12.6075	14.2544	0.0871	1.5158	1.2952	7.3884	1.3682	17.7854	0.806	1.398	2.0143	4.1969	17.8381	41.0294	0.8344	19.549	2.2838	32.4116	0.2187	1.1296	3.3414	2.6279	5.3771	4.9801	9.2938	6.914	0.8678	5.2045	1.8436	0.662	22.9288	0.1174	5.6866	6.9634	1.49
60da62bd-de6d-4b19-b56f-e5cea1146588	0.0072	0	0.2126	0	0.146	0.3434	1.0125	26.162	0.077	0.9109	0.8008	3.1449	0	0.4854	7.544	45.2308	0.0768	2.263	0.0423	8.5624	0.5266	3.1278	7.4546	12.5575	0.193	3.7377	10.0294	148.064	0.4842	40.7509	0.4195	12.0864	0.0643	0.3379	3.8209	0.6838	9.9653	2.4393	35.5484	16.7903	0.4665	3.962	1.5667	0.9727	26.6646	0.3943	18.3654	8.9415	0.7692
29774d01-31ba-4ef6-a0cd-fc405ca38efe	0.0372	0	1.961	0	0	0.1628	1.567	39.3632	0.0099	0.3419	1.1991	6.0536	0	1.6241	5.2962	32.06	6.8538	4.711	0.1633	13.7565	0.4723	2.9068	10.3097	1.407	0.5382	2.4349	10.7328	95.366	0.402	29.0844	20.0806	18.9154	0.0414	0.1791	6.7456	0.3968	18.8407	4.3224	78.7136	12.7294	0.7404	3.5095	2.282	0.3414	23.2735	0.7612	22.2524	11.6569	0
f8498c1b-9fef-4915-96f9-3def89d585a6	0.3416	0.0209	0.4594	0	0.642	3.9492	0.4561	3.0632	0	0.8083	0.6067	3.8503	3.8864	1.4832	4.0052	6.6784	0.166	4.5854	0.1175	2.7401	0.591	9.782	0.9031	1.043	2.4724	3.3092	6.5973	58.7632	0.1663	23.1949	5.593	8.8314	0.0298	1.2148	1.4698	0.9062	5.0762	6.3683	6.4832	7.9214	0.1584	4.0096	1.0073	0.3275	10.4941	1.3463	8.4814	4.5196	7.0675
39bf9f0a-4e12-4a81-aa3f-22ce63f8d27a	0.2162	3.3305	1.7084	0.0447	3.7823	9.4787	1.1872	10.2066	0.3935	0.6586	2.4425	9.622	2.0234	19.9837	9.5194	20.4061	0.8641	4.6946	0.0408	10.1943	2.6305	6.835	2.418	3.1623	3.1017	7.3531	6.2652	124.212	1.054	26.6206	214.992	17.4467	0.0929	7.8096	10.9263	5.0413	9.0166	38.7834	26.4844	16.0324	0.6596	6.4846	1.909	0.4263	22.2857	0.0238	27.3984	8.1678	1.9396
1a35e230-2471-4965-8b00-7c1ae932d3a8	0.5572	0.7051	1.9184	0.0482	1.1017	2.6339	0.6837	13.0869	0.7295	0.5926	1.2429	3.0573	2.1847	11.0666	7.7834	22.2138	0.2799	3.9097	0.6164	13.8976	1.3454	6.8736	3.6987	4.0354	1.2057	4.292	24.7421	89.3019	0.439	24.8957	41.1349	20.425	0.0335	1.4899	3.6507	3.0427	7.1171	13.154	24.2528	13.3589	0.7122	3.99	1.88	0.7364	23.6685	0	10.6519	16.7222	0.9239
c009cb65-9a88-4f4a-8adc-79643044ed70	0.408	0.8438	0.0625	0	0.3474	0.7901	1.5532	24.0088	0.0054	0.7225	1.3449	2.309	2.9596	0.5134	5.3124	24.3293	0.1444	4.4192	0.7157	41.4748	2.0814	5.1948	24.8804	12.6853	4.7637	3.1706	14.4226	76.2813	0.468	16.9883	2.7803	6.2954	0.2945	1.1283	5.7264	13.7457	14.5302	3.0169	94.3955	5.9192	0.7346	17.5798	4.1347	1.1846	32.136	1.7204	33.9636	11.765	3.296
7ab48514-b24b-4415-bde4-462d8982c910	0.0078	0.1463	0.1339	0.0167	0.1182	0.3707	1.3146	73.5216	0	1.0244	1.509	2.6656	0	0.3144	8.3093	41.4509	0.1106	2.7245	0.1826	10.1591	0.0689	2.1761	25.7603	37.7012	4.8279	6.5444	16.9731	71.6904	0.3794	40.5557	1.268	3.9497	0.1388	0.2361	0.538	3.6477	14.6925	5.1373	144.857	31.6344	0.8729	11.0215	3.0891	0.9546	36.8569	0.7184	30.3913	18.4445	1.7887
807a2ba6-e22e-481e-92b6-557acca36460	0.7415	1.2988	3.5626	0.0352	2.2656	3.2012	3.0391	23.2196	1.7411	0.735	1.9073	4.3668	3.5859	7.8518	9.9038	28.8097	0.8896	2.9825	2.5291	25.339	1.3813	8.4516	13.1931	6.4536	2.7119	4.3173	19.4893	57.6351	1.0986	54.1536	33.0656	10.0462	0.1647	2.8417	11.7636	7.9035	12.3428	10.6813	82.4053	17.0846	1.3904	17.1702	4.2135	0.7554	35.042	1.2773	21.479	29.8729	3.3026
56f05f21-2d25-4471-9e51-f3cfd9332a8c	0.1705	0.555	4.2403	0	5.1263	0.8976	2.3475	25.508	1.3366	0.7997	0.9715	3.0119	0	3.5798	26.9513	46.2493	0.1798	3.4711	0.1485	18.7995	2.3934	7.9674	8.5802	18.2669	0.6779	2.4785	20.6706	81.9276	0.3291	22.4871	33.418	29.1687	0.0645	0.9025	9.8524	0.2825	15.8548	3.5106	70.198	13.2513	2.5196	4.8534	2.6798	1.5526	35.8259	0.1731	23.6715	21.9332	0.8015
6abac00b-ac00-47e5-8c1d-2d697db1c0cb	0.6851	0.0497	2.2639	0	0.2814	0.3583	1.5522	39.0724	0.2799	1.0868	0.8339	3.0343	0	2.4059	13.2834	28.0298	0.1833	1.0831	1.444	15.9308	0.0879	2.3348	10.0134	16.0198	0.4961	1.1706	63.1761	76.2867	0.258	37.1068	1.9405	9.4979	0.177	0.5473	4.6148	6.66	17.1557	2.9068	55.6025	17.1376	1.2331	7.6718	4.5654	0.487	25.9525	0.1357	24.5577	37.2976	1.0427
aa43bf5b-6618-4bb5-8de2-6554cc98c115	0.1875	0.2492	1.2587	0	0.5605	0.425	1.4381	26.5288	0.133	1.7487	1.8379	5.5135	0	2.7259	7.0671	38.8728	0.4854	2.4451	0.6901	3.1758	2.9943	4.2199	2.8588	7.9031	0.4941	5.7122	1.0928	172.353	0.3636	15.4751	6.362	6.2919	0	1.9033	10.9672	1.0296	11.0357	10.5363	21.3393	18.58	0.9702	7.6149	1.7858	1.3156	28.835	0.0237	41.2828	3.7056	5.9354
cdda6aee-e393-4aac-a1a5-93fa7984ad66	0.1703	1.0629	3.0031	0.0519	3.8778	4.3512	2.2175	6.2639	0.1761	0.5105	1.978	8.215	5.6457	3.8195	13.2612	15.2934	0.0517	1.976	0.1706	3.9357	0.9979	13.4152	1.0073	2.2282	2.7478	5.0507	4.7574	57.8521	0.625	23.0618	220.212	31.5161	0.2377	5.1936	7.0755	1.9476	5.4654	32.0285	17.8152	11.543	1.0353	3.2717	1.1926	0.4163	13.7152	0.2486	19.9833	7.0311	1.2734
4a86f9a1-e98b-4783-9e0f-8904997b0f89	0.1209	1.531	0.8065	0.0287	0.6441	0.8897	0.5973	19.6672	0.0715	0.423	1.3389	2.7039	0	2.8407	7.6902	24.4437	0.1546	2.6522	0.1178	15.443	1.245	12.9444	2.3296	5.0472	1.3746	4.3722	15.2806	107.499	0.2104	17.3536	33.1196	32.3439	0.1791	1.7356	5.3492	1.8183	13.2702	16.2315	11.5544	14.8504	0.9533	3.6287	1.6169	0	18.9753	0.5265	16.0209	10.496	0.1099
09054fbb-1b70-48b6-bc41-1340862237e5	0.3933	0.341	1.1598	0	0.7166	2.2203	0.6751	12.8131	0.1628	0.6497	1.8914	4.423	0	4.6926	6.9907	21.0598	0.1676	3.7581	0.4259	15.9547	0.964	6.3691	3.5778	3.8702	2.2678	5.1985	14.9554	71.9868	0.4325	24.2392	103.744	14.0123	0.0647	2.9025	5.576	2.5922	10.0345	9.5432	19.1153	16.1531	0.5324	3.6555	1.8624	1.1575	23.3462	0.6701	17.0531	12.4657	0.715
a6989c7c-dd4d-4716-88b2-0ff42543080d	0.2959	3.0052	0.7158	0.04	1.0301	2.5553	1.1692	22.3793	0.6421	0.57	1.5911	3.9439	1.0869	4.299	9.1887	16.8912	1.0145	3.8104	2.5407	10.5907	2.3469	10.5649	6.7651	5.4566	2.8992	4.5851	10.1231	71.2907	0.5217	29.9494	20.6386	10.4886	0.3495	1.8376	15.5147	9.1242	8.2841	5.3637	120.561	11.2154	0.5154	25.7581	2.9243	0.7785	27.2257	1.3147	33.5319	7.347	1.0113
6ac09968-001a-4ee8-9aae-c3e7a46c728f	0.8955	0.3993	2.7685	0	0.5917	3.9069	1.1697	28.207	0.0227	1.6409	1.4307	3.6775	0	7.6318	20.5865	45.4024	0.5032	3.2015	0.2493	15.7974	0.5958	10.6884	7.0167	9.7343	3.7619	2.961	17.7862	94.2844	0.5985	25.3156	8.0789	40.7631	0	3.2522	8.1254	0.4875	13.9746	6.719	49.047	28.7924	1.7266	7.442	2.3626	0.0869	31.2439	0.1937	30.2954	11.8988	4.5932
e90a9fec-4e4a-4658-aa64-7213980dbba7	0.7202	0.4802	3.2034	0.0896	2.4696	15.9866	0.9391	11.3169	0.9975	1.1007	2.2803	8.9699	0	15.8147	9.9238	24.3135	0.3589	10.1364	0.8586	14.5456	2.5914	9.4405	4.2767	3.1069	6.718	6.2779	32.4747	123.399	1.6458	38.7912	45.7434	42.02	0.1243	14.4608	15.5598	3.8366	9.4776	29.998	23.2715	15.8177	1.3078	6.4845	2.8292	0.8548	31.7713	1.3819	29.2874	27.009	7.1503
d1305843-a9f4-44ca-883e-46e3d518ad24	0.0115	0.9805	6.1654	0.0164	1.1403	0.4211	1.5651	28.4096	1.1214	0.5226	1.1026	2.0646	0	2.0052	9.583	18.0894	0.0136	1.1482	0.112	15.901	0.3633	8.5395	4.3166	7.6676	0.92	3.0741	8.3597	94.5619	0.0993	17.8419	1.6439	38.9679	0.2382	0.9422	10.5275	0.213	11.3401	9.8047	29.7401	15.5176	2.1328	2.9276	1.3597	0.2341	31.5432	0.0392	45.8357	9.9424	0.2507
ed9513cb-89a6-4f5e-afaa-bfd47df25f01	0.5139	7.5376	11.3964	0.0403	4.9573	4.3528	1.8728	11.5672	1.9793	0.6147	2.3658	11.9084	2.1929	15.3689	21.7418	19.8288	0.2408	5.5275	0.0663	21.3676	3.1511	11.4567	11.1558	9.4858	1.1934	6.4621	13.9747	111.59	0.612	28.6886	103.486	31.071	0.2182	14.0307	20.3088	0.0911	9.5026	43.099	75.1537	14.1913	2.2178	8.7898	2.7397	0.3234	34.7182	0.103	33.7332	14.8661	0.371
9ad325c0-6240-415b-9c7e-152814e8917f	0.0061	0.143	1.7286	0.0065	0.5086	0.7327	6.1303	5.7817	0.478	0.9616	0.7686	3.6109	0	8.1382	6.4923	31.0108	0.0595	1.536	0.1072	12.7007	0.0337	14.3968	4.4571	7.0657	1.0869	4.6364	9.9451	92.9478	0.1187	20.443	1.2754	55.1212	0.3392	0.319	9.9771	7.4455	15.7294	8.8485	30.8503	14.1126	1.287	3.245	1.925	1.0082	51.3678	0.1249	36.399	8.6913	0.6247
bb78dcbc-a8cf-4a78-bba4-3979e9a9e715	1.0018	0.8649	0.1392	0	0.5377	0.4971	2.4729	10.9239	0	0.8575	2.0094	5.1442	1.0308	0.0715	9.9145	13.8527	1.8739	2.1181	2.3471	3.9357	0.4153	9.8483	5.9536	4.1495	6.5573	4.113	18.2073	39.3626	0.395	31.7156	53.4423	127.883	0.1263	0.4735	10.8875	4.2605	9.2657	2.9459	26.1297	16.4133	1.0692	13.7566	1.432	0.2171	14.1107	0.7384	21.3092	15.2776	3.4583
65c5640b-629d-49be-bfa5-8338578ec8c5	0.0177	3.338	4.3421	0.2396	1.5948	4.5467	0.5811	7.6494	0.2138	0.682	1.4033	6.3262	0	3.172	10.3814	19.0761	0.6484	2.8451	0.2418	6.7491	1.3033	22.5665	2.2761	3.4098	2.838	4.7032	4.8586	113.343	1.0269	22.4258	80.9977	27.303	0.21	2.9063	6.4677	6.0342	6.796	23.7123	54.5968	15.4607	0.7494	8.0525	0.9775	0.4334	26.2528	1.6306	17.0806	10.073	0.8699
244e24cc-fd21-4c32-b64a-738c431d906a	0.993	2.467	3.1484	0	0.9795	1.4767	2.4244	22.535	0.8084	1.0638	2.4348	4.272	1.994	8.0482	9.7306	32.0205	0.3589	2.4427	3.8173	24.342	2.1073	10.8467	11.9145	7.1459	2.0327	6.797	17.034	75.4312	0.5342	31.4602	4.9023	4.2208	0.3206	0.9018	14.249	11.0956	11.9651	6.7247	98.5293	21.9216	2.1422	50.599	2.61	0.5881	35.284	0.4449	23.6047	15.2401	0.6746
da001b46-0e88-43b1-a03b-8f315112370e	0.6667	0.7031	0.927	0	0.6364	1.2156	0.5453	22.632	0.0575	0.7564	1.2332	2.8164	2.614	0.8465	12.5004	12.0438	1.0525	1.9036	2.6865	5.9017	1.4111	9.0034	6.8551	2.8887	1.5628	2.6913	4.6206	97.4509	0.4377	19.3592	8.7777	2.848	0.2802	2.6245	7.6327	3.9913	15.4244	6.3752	35.7907	9.5904	0.8328	4.5216	4.3227	1.7622	10.4696	0.4912	24.9891	5.1737	0.6633
871d7770-b9e8-455d-9c7a-77e8b5eb9f95	0.8355	0.3783	1.25	0	0.4827	0.7331	1.5684	60.7216	0.1086	0.6359	0.796	1.4896	0	0.9417	6.4919	58.2253	0.2145	1.7237	0.0746	17.3425	0.8582	2.7885	8.3851	12.9129	1.1064	3.069	19.5815	97.2844	0.661	26.7228	3.3289	7.2775	0	0.1753	7.21	2.6127	17.7441	2.1156	61.5456	13.2015	0.8501	3.8509	2.8587	0.078	21.2329	0.239	14.1052	26.6836	0.313
7aeeeae6-6243-4c04-99c9-6609949a0436	0.8343	1.3987	2.6118	0	0.7406	2.1234	3.8288	18.5918	0.2961	0.6486	1.4618	3.6643	4.4832	6.2217	8.0573	32.2952	5.1143	4.5555	0.1807	20.1368	1.0566	14.6988	8.5571	9.3423	1.1683	3.8672	40.6064	91.7949	0.2669	45.8543	9.8568	26.9804	0.1373	1.5924	7.5309	1.117	12.1245	9.7378	34.4388	23.1868	0.6975	4.5268	2.9283	0.7556	41.5041	0.1053	10.5949	25.5666	1.5168
9c11aa57-3406-40a0-828e-590854118d6e	0.3432	0.6373	0.4257	0	0.789	0.445	3.3855	19.1659	0.0185	0.7978	1.9325	4.0115	0	0.3207	14.085	12.0212	0.3383	1.4729	1.6001	6.2106	0.2779	8.2233	9.5186	6.5266	1.5071	3.0373	18.2079	23.1842	0.2486	47.5956	34.3128	21.5271	0.0579	0.6268	9.6442	9.8399	10.6524	3.2661	47.6432	14.9004	1.2887	20.6622	2.692	0.3717	25.0134	1.5838	21.6026	34.1289	1.3148
0c7a9377-9787-4ea5-aae4-9e08665aab78	0.3496	0.3234	1.9828	0	1.3721	8.8979	1.6044	17.3131	0	0.8154	2.2287	7.3285	1.8787	4.128	14.6853	25.4031	4.5728	3.0756	0.0379	20.6716	0.1857	11.9146	4.7395	5.1309	4.003	3.262	31.387	115.684	0.8249	33.6266	1.8775	2.7096	0.4602	4.3951	5.4524	4.3207	13.7988	14.7474	105.393	19.385	1.211	6.7961	2.4542	0.6332	32.6875	0.1324	18.4792	16.4381	0.4237
0693ceb6-b56c-4293-9c10-9869f55bf85e	0.0439	0.0411	1.9468	0	0.2547	0.4827	1.2374	33.7667	0	1.244	0.8926	3.0762	0	0.442	4.3239	35.5784	0.171	1.6612	0.3851	3.4714	0.4261	2.6789	17.2529	17.3152	1.035	2.6727	20.4131	41.5115	0.5024	33.5331	9.8282	20.0781	0.039	0.368	2.0839	4.8259	14.2308	4.1019	70.1692	14.5401	1.4252	8.4448	4.2593	0.2684	28.1449	0.2244	16.1917	12.7346	2.8732
12f84876-ebc4-4d39-bd44-3a73cbb82650	0.5306	1.28	2.2539	0	0.7128	0.4219	16.8165	7.2498	0.4182	0.6147	1.7688	4.2221	3.9992	0.8094	22.0084	14.8771	1.4516	1.5973	2.1154	4.8551	1.7635	10.6783	4.9617	3.1252	1.8698	3.8059	15.3874	28.5691	0.253	25.4061	57.5126	51.2998	0.2602	0.5871	9.1624	8.5014	8.4497	6.4387	39.1318	9.2211	1.4889	11.7809	2.125	1.2637	29.9833	0.8571	22.6914	14.12	4.8484
9088aea9-d215-4eb7-b0d9-cb66b87d1f31	0.373	4.7842	3.0793	0.0346	1.1047	2.9785	7.7925	12.3825	0.3022	1.234	1.7303	2.0106	4.7059	4.1361	7.9865	23.7473	0.9043	1.9659	0.2845	12.8239	0.9481	10.1691	5.6236	3.8631	1.587	3.0118	16.6937	82.0173	0.858	61.9127	2.0693	44.6294	0	0.8246	7.16	3.8932	9.8705	5.1107	41.5366	15.2266	0.8368	7.6027	2.3297	0.4957	32.6743	0.7184	17.1327	12.9053	1.1941
822150f4-4085-40be-a6c2-610e2a151c28	0.457	1.9375	2.8741	0.0582	4.0092	2.4541	5.1867	13.4388	0.7334	0.7874	1.1533	5.9066	0	3.7078	6.9607	20.5384	2.0645	3.6645	7.8565	12.0406	3.6864	13.9606	4.96	3.0931	3.4585	3.3813	7.853	74.5285	0.8174	50.5216	51.4239	10.2265	0.1818	2.5212	12.9498	11.5813	8.4846	6.5612	37.6048	17.6983	1.3783	10.1655	4.3499	1.0006	26.9955	1.2317	36.1527	10.899	3.0689
5ed8be3b-f966-4974-8920-344a1c3687e5	0.7759	1.8872	1.0138	0.2485	0.6851	2.1246	1.1681	19.2466	0.2134	0.967	2.4666	4.4145	0	1.0849	13.5347	16.3662	3.0331	2.0812	4.9527	6.4875	1.0199	16.2171	6.4615	5.6276	4.3716	4.2496	16.862	44.6643	0.9285	31.4521	14.3625	82.1429	0.1724	1.6571	15.9561	6.808	10.3787	7.078	33.2757	15.0094	0.9383	16.9347	1.8187	0.9091	24.5293	1.0025	25.6448	11.3446	6.1096
43ebdec7-cdde-4b82-bdda-8339378b794d	1.0669	1.057	3.9428	0.0078	2.9578	5.8955	5.8063	43.9931	1.4188	0.8216	1.3633	10.0876	0	5.3761	25.7036	22.6737	0.348	3.0835	3.747	24.3885	1.3012	17.2847	19.4468	14.5775	2.2512	4.0511	9.0413	54.9411	0.6958	28.5398	10.9386	17.836	0.6309	2.7969	8.4742	9.1659	15.5202	11.7157	61.1797	15.4506	1.7847	9.3044	3.9488	1.2909	43.5459	0.4963	42.9859	5.0209	1.7872
c18f0ac6-1a90-4786-978b-b23eba693b1f	0.616	3.2318	4.7518	0.042	1.7853	1.6864	2.9872	49.4297	0.9348	1.0315	1.3586	2.2368	0	10.6863	19.0406	25.7663	0.116	1.6959	1.9157	21.8546	1.5612	6.1393	7.4159	6.5434	0.4372	1.82	6.4434	70.2325	0.4245	33.7898	8.5885	9.4498	0.0291	0.2161	8.3107	4.9436	13.673	4.0936	55.6153	6.9271	3.2964	4.6076	1.5868	0.6409	31.365	0.1786	17.4065	10.1837	0.3216
c69e5a23-af0c-48b7-b8f5-3c1075974812	0.8493	3.2585	1.6254	0.0378	1.5176	5.1061	1.0877	20.7293	0.5651	1.0212	1.8164	7.1204	0	9.3212	16.7361	24.5194	0.3602	1.6374	10.2415	15.2098	1.0343	14.7064	13.5052	13.9397	3.502	9.4853	14.8789	108.418	1.2798	22.4139	9.9531	6.8449	0.6288	4.1696	14.3351	6.9529	16.6053	14.4275	65.456	20.2732	1.5595	12.8916	2.1157	0.6489	38.3835	1.4469	42.0259	10.2324	1.8816
eb908245-e14f-442f-a9ce-85e66c169d73	0.0065	0.6274	2.8591	0.0415	0.7033	2.349	26.3681	10.0826	0.5798	0.5783	1.3312	2.8655	0	3.655	8.8848	15.5985	0.1148	1.6567	0.0758	12.3096	0.5006	15.7935	3.0599	2.7917	2.5089	3.1408	10.9505	45.1404	0.238	26.6864	4.8129	15.2059	0.0864	0.3385	7.892	3.966	6.8221	4.4804	21.2234	12.3657	1.0454	8.1102	1.3165	0.8719	32.1453	0.0442	15.6205	9.2768	2.8111
59873db0-9edb-42e9-aecc-7108c0176909	0.3069	0	0.4101	0	0.3695	0.244	1.0026	46.0329	0.0148	0.7685	1.3899	3.358	2.0236	3.838	13.765	24.3866	0.4938	2.4447	0.1223	10.1794	0.2	2.1781	17.2636	15.3981	0.6824	2.9844	59.7228	89.6846	0.2409	20.1823	12.9429	8.1259	0	0.1246	6.318	0.4913	13.8372	7.3257	71.7351	15.3639	0.7796	6.3609	3.6505	0.4263	27.0381	0.4753	25.9796	11.4157	0.3994
e99d4833-8c2c-4d2a-a8ee-441a4f041b1c	0.5562	1.0041	1.1821	0.0572	0.4227	1.4233	0.431	34.2831	0.0642	0.8439	0.4317	2.4321	3.889	1.5292	6.7328	14.5181	0.688	2.7992	0.7445	14.2023	1.4636	10.3035	5.2283	3.4688	2.176	3.2248	8.3794	41.9484	0.3618	19.6615	10.8823	4.9634	0.1489	0.8012	8.1916	3.1801	12.7584	4.4459	85.6397	10.4036	0.9509	6.2147	2.4393	0.9831	32.2049	0.5252	13.786	6.7186	1.864
eeb197bf-8e25-47e9-afaf-e42dc3f5541a	0.9248	1.8461	9.115	0	3.1739	5.2125	4.3733	13.4688	1.0074	0.6771	1.8183	5.6413	0	9.3095	20.1872	41.6979	1.0849	3.2938	0.3144	30.6487	2.7991	6.9231	8.2857	7.8318	1.9132	5.6607	25.2556	159.536	0.9404	53.0996	49.0173	6.7987	0.0955	2.6006	6.1742	4.9234	11.4586	23.3037	73.0789	15.5011	1.6182	10.8212	2.6364	0.5258	66.1182	0.1099	22.5195	16.7292	1.0556
f6ab9c8d-9cd1-4803-b44a-402165a64523	0.027	0.1568	0.4355	0.2145	0.2632	0.1545	0.7968	4.5139	0.1934	0.4055	0.2334	1.0969	0	0.5965	4.2293	5.6287	1.9631	0.4747	0.113	2.789	0.861	1.9309	1.0235	1.2922	0.825	0.6677	3.1643	16.3379	0.025	10.0763	7.2611	22.8379	0.0515	0.0425	0.996	1.2535	5.0998	0.8332	7.5323	3.7422	0.648	1.7032	0.5406	0.1417	9.8833	0.0395	6.3977	2.564	0.7587
9316e258-e626-4a41-ab07-85210c5290b8	0.5016	0.851	1.5629	0.0349	0.8528	0.0545	1.7121	26.6653	0.238	0.3433	0.6915	1.0972	0	0.2561	5.4059	13.0467	0.3667	0.8485	0.1594	2.0052	0.1443	1.2313	6.5383	9.7655	1.3581	1.9898	11.6584	57.6613	0.1472	10.8939	0.6324	6.6155	0.0969	0.0225	3.6733	0.475	5.8344	1.2057	14.5002	13.906	0.211	3.8478	1.55	0	18.7234	0.0186	12.8333	6.5101	1.2489
2420fc74-a8a2-44ab-96d3-7cb6636b72e7	0.5454	1.7234	0.1155	0	1.138	1.6319	0.6495	41.0298	0.1505	0.6006	0.8674	4.9113	0	2.5756	8.9778	40.1087	1.6924	2.5917	0.1181	6.7321	4.5747	8.9932	17.3151	10.116	0.8086	3.2508	15.6945	54.4934	0.3998	40.3161	3.28	6.4665	0.1196	0.7864	10.6527	9.1109	31.4005	4.2434	65.841	10.4525	0.4777	7.8048	5.013	0.7408	32.4845	1.1471	32.4018	14.5818	1.3219
917ab8a9-c11a-484f-8490-42b31f28f785	0.4728	1.5853	2.4169	0.0872	1.7525	2.0858	1.3803	8.6264	0.5283	0.7045	1.5629	4.6148	1.6938	6.3468	20.8934	18.2899	0.651	2.6583	0.1365	23.3476	2.0991	2.6365	2.7832	1.337	0.8309	3.3653	14.485	70.2614	0.4097	20.2002	82.4041	37.3477	0.0519	2.5108	6.2716	3.5277	8.7193	14.0065	15.3972	6.4301	1.0165	3.1232	2.0195	0.2141	19.2955	0.1392	12.7663	15.7963	1.2894
9065c212-827a-4703-85c3-56fc39689c59	1.8266	8.1094	1.765	0.009	5.3029	26.6637	5.5876	14.7319	1.0016	1.9347	6.5348	11.3298	2.4594	23.4932	12.8965	23.1881	8.4618	10.9889	8.9949	27.0026	4.2351	26.3077	4.5921	2.4266	14.6277	11.9691	10.7031	135.944	1.8622	64.5694	96.1006	14.0862	0.5837	20.5571	28.0428	19.2781	8.1817	45.1484	36.9788	26.16	1.977	22.7708	3.0342	0.5699	53.4283	5.9927	61.1843	20.6459	5.5818
19157b7f-adee-40f3-a215-e5855541bb1e	0.0501	0.9478	6.8559	0	1.0424	2.9331	1.7882	46.4109	0.01	0.5913	2.3126	4.5779	2.7248	1.7857	10.8109	42.9034	0.2216	2.6201	0.0915	14.2535	0.29	13.3103	16.3564	15.4858	1.4062	5.2266	65.8853	119.971	0.703	27.3589	2.941	8.529	0.3477	1.2001	13.7794	0.2611	14.1799	20.4205	64.8122	35.544	0.6124	12.5366	4.0398	0.8419	71.9347	0.096	20.2079	17.423	0.5634
6d98efb6-45ab-47bb-a206-f1af1711097a	0.2642	2.4119	1.7797	0.2538	1.0996	1.0891	0.7995	12.1289	0.1125	1.0742	1.582	2.9425	3.8324	2.0388	13.3134	11.8769	1.3092	1.8173	0.1158	10.3222	0.8013	6.0922	4.866	5.8686	1.9974	2.6767	5.4778	60.0491	0.7273	31.0251	5.4386	42.5888	0.2347	1.2342	6.1849	5.6679	12.0134	3.9796	39.1519	14.3532	0.8376	6.5617	1.788	0.7266	25.5401	0.7426	23.54	8.785	1.8368
47de1431-6475-4db5-9a56-63c3650b2356	0.7945	1.4803	3.3732	0.0266	1.5216	0.7899	1.7783	29.5348	0.248	0.4365	1.7501	2.9147	0	3.7968	7.4633	42.5679	0.3755	1.9351	0.2919	18.8361	1.1379	16.7086	20.9745	13.3954	0.6846	4.0504	16.3175	48.3309	0.5659	25.7405	1.4475	32.825	0.1848	1.4805	1.2526	0.1851	16.6179	8.072	80.9196	20.6956	1.091	10.2163	5.9002	0.2543	58.0691	0.085	28.2931	18.9491	1.2591
476a249d-6cc1-469a-8638-1d44a2822a7b	0.322	0.3748	4.92	0.0116	0.8123	0.7636	1.2801	33.6398	0.0174	1.4318	1.6698	4.9808	0	5.1275	11.1457	32.3904	5.5641	2.1632	0.0957	12.017	0.5779	5.8209	10.8806	15.7237	0.3398	2.723	19.5445	115.006	0.5774	27.2171	0.8862	39.9912	0.1455	0.5024	5.8351	1.0824	15.183	4.4954	52.8651	14.4025	0.7978	6.2009	3.5214	0	25.5499	0.093	31.1172	14.5811	0.7589
70df5df0-50b6-4aae-a162-cc99ae687418	0.5202	0.0594	1.461	0.0271	0.9443	1.2998	2.3161	20.3118	0.6281	0.7656	2.1199	2.8039	0	5.4498	9.0036	21.092	0.5615	3.3668	0.1484	9.8137	0.8257	19.2944	4.5828	7.6137	2.596	5.6138	13.879	84.9949	0.4315	23.1633	25.313	18.0304	0.0846	1.9702	7.0423	0.9996	10.4373	13.047	18.5765	13.0377	0.5455	6.6428	2.4142	0.3102	23.326	0.1729	15.1278	7.41	1.2456
8a602089-2afc-49de-9fb7-e2476af3a59a	0.9554	1.6418	6.2387	0.1634	1.2849	1.8631	1.2279	14.1949	1.935	0.8384	0.6567	3.5286	0	1.5638	8.1654	19.1775	0.0766	1.1996	3.7954	5.4861	1.6155	12.2832	12.8569	6.7244	1.6879	2.8704	46.9271	84.188	0.4169	37.7741	8.7647	3.2772	0.1923	2.31	11.213	5.2511	11.7992	21.9549	52.0685	7.4071	0.9733	7.1577	2.2431	0.6918	21.0386	0.0907	28.029	7.8843	2.7776
1b81b3be-48fd-4510-81a1-0795de43907b	0.0485	0.7569	0.1188	0	0.2796	0.277	1.1664	54.5046	0	0.4726	1.6178	2.4397	2.0103	0	5.8538	34.8906	0.1104	1.986	0.0405	12.9628	0.1376	2.2635	15.8818	24.1825	1.3251	2.5619	45.1889	40.0957	0.7181	22.2887	2.893	10.0956	0.0616	0.3808	8.5217	2.5171	13.2517	7.6221	109.974	17.2088	1.2064	5.7012	4.481	0.6776	15.3437	0	21.8707	16.297	2.097
769ad26a-1ab3-487d-8645-97b5638cfe6a	0.2609	0	3.6286	0.0449	0.828	0.2208	8.3336	3.79	0.4166	0.287	0.3727	0.6955	1.2209	2.1744	9.9548	7.0177	0.5437	0.896	0.6151	6.306	0.5198	7.7229	1.8238	1.8503	1.6657	2.0044	4.5618	30.4976	0.3135	21.0243	0.3416	22.4357	0.2056	0.9945	4.0481	1.8486	5.7033	2.4426	17.1669	3.4217	0.9317	6.1319	0.981	0.0514	13.1467	0.0573	9.1759	4.2117	2.7538
b1f5eedf-cafb-4585-b9aa-2e20f9f60066	0.0538	0.6344	0.2636	0	1.8999	3.3453	1.3341	15.6459	0.0255	0.8154	1.5762	5.5411	1.7343	5.1746	6.3127	20.2492	0.1587	2.0462	0.0699	9.6032	1.1471	4.8246	4.0586	4.4627	1.5154	3.6483	2.6321	79.5529	0.342	19.192	30.9894	15.2778	0.0266	2.9075	8.1144	3.5454	7.0887	18.8018	39.8364	9.1463	1.0537	5.1317	1.5913	0.3654	21.3788	0.0204	20.2343	5.6626	1.5158
94056b86-1823-4e00-a170-42ca6069014a	0.0349	0.2491	0.0489	0.1384	0.5158	0.4237	0.3302	1.509	0.0159	0.5234	0.4417	0.9498	0	0.0669	5.096	31.6626	1.9685	1.6419	0.9039	6.683	0.4401	2.5878	4.9475	7.6299	2.1517	2.0616	3.775	55.9712	0.2584	24.5803	9.6023	46.9506	0.1551	0.048	3.4488	7.2845	11.3845	0.3584	27.1356	14.7468	0.4181	3.8625	2.1979	0.3048	26.4837	0.017	22.8906	6.6179	1.0607
98f31bc2-2905-49bd-b2bb-c2fa5aa313b0	0.0226	0.7056	2.8058	0	0.3992	0.7719	1.8386	39.5534	0.3209	0.4349	1.0769	4.6027	2.1863	4.2477	4.5162	49.4295	0.1334	2.888	2.0266	13.509	0.5153	15.3859	11.648	11.0101	1.0389	2.4334	31.7822	70.5814	0.6671	17.3974	15.644	6.3745	0.2678	0.2174	5.4223	3.0588	19.2497	6.0401	102.546	15.6521	0.8585	10.174	6.3467	0.0921	29.3193	0.0513	22.4824	13.8369	1.7875
c94ecc2b-103a-4604-be28-deecb6c64d60	0.0067	0	0.1803	0.0286	0.0338	0.0334	0.2784	12.0526	0.0071	0.316	0.1616	0.601	0	0.2694	3.913	28.3337	0.4027	1.1836	0.0782	2.8143	0.2509	27.1637	1.2244	1.8695	1.5177	1.0264	44.8941	49.4485	0.065	9.5162	17.3059	26.9924	0.1189	0.0184	0.5293	0.0992	6.2943	4.6236	7.7928	5.4902	0.1007	1.9943	1.5095	0.0818	14.1167	0.0228	1.984	17.2796	1.0947
01b3e7a0-9d1e-4072-a5c1-43c2f79764b6	0.025	1.0745	0.092	0	0.1105	0.6724	0.3788	5.7253	0.06	0.7553	0.2646	0.8771	1.816	0.378	3.082	8.2579	0.0111	0.6561	0.0366	1.2947	0.925	0.9923	1.1454	2.0355	2.8395	0.5154	3.2211	10.722	0.1216	10.4046	8.058	13.7931	0.2502	0.1204	0.7187	0.0696	3.2091	1.3148	16.535	4.3954	1.8837	5.0705	0.7625	0	13.4437	0.064	7.5395	6.1224	14.2847
e192da21-43a2-4a8b-b656-088bbcb4e472	3.5184	0.5436	0.0261	0	0.2331	1.7316	1.9025	17.4308	0	0.5408	1.4881	4.6101	2.0624	0.0239	7.4039	12.8682	0.2579	3.8188	3.5741	3.4064	0.5253	18.6806	5.186	3.0768	2.5134	4.614	14.8902	27.4759	0.3453	46.0293	102.149	33.6404	0.2053	0.5518	8.7428	5.0529	6.4967	7.1911	59.6442	21.8063	1.4287	15.6006	6.7462	0.2172	38.8466	1.0656	26.4998	12.436	3.547
c000c10f-6fb0-470d-9ece-281d7106be58	0.3247	1.7628	0.9339	0	1.9055	3.4218	0.7077	17.5841	0.0225	0.4815	1.6483	4.2359	0	3.2215	12.3947	32.8598	0.1999	2.5785	0.2476	12.3476	3.021	11.5654	5.6432	6.0466	1.1931	3.659	20.9113	115.659	0.3734	22.275	5.7314	11.0938	0.2509	1.8624	5.5843	6.0191	8.1201	13.0344	8.8851	6.0533	0.7284	6.0247	1.9537	0.1726	25.3498	0.1443	13.6493	12.7112	3.8691
2472d7e6-bda7-4bfc-a51a-8d779c74eeb4	0.0254	2.9556	1.719	0	2.6872	6.9073	1.3593	28.7325	0.198	0.5767	2.5016	10.8749	2.4529	10.5528	15.1675	37.2545	0.1197	5.6774	0.2471	11.7172	1.2122	4.7523	12.6209	8.7517	3.7978	9.665	57.0538	109.362	0.648	48.7464	25.7887	19.089	0.2629	10.6641	11.1749	9.5277	16.283	34.4915	70.3101	19.8735	0.6906	10.3165	4.6285	2.2737	52.0608	0.4897	22.9267	37.7144	1.7289
da6795f9-c2c4-449e-821b-cea5e4e20cb0	0.0035	1.9909	0.2293	0.0148	0.6121	0.8574	1.2327	16.6835	0.0074	1.0185	1.2211	3.3504	0	0.4653	16.973	34.9878	0.0736	1.0447	1.7024	5.4576	1.384	10.9085	10.0993	10.1776	3.8698	9.6832	4.7694	85.5324	0.6961	22.6548	4.6236	4.0804	0.1078	0.5335	9.5973	11.0836	8.8091	5.2315	58.498	37.9496	0.9389	16.1517	0.7612	2.712	92.3508	0.0945	60.6637	4.4198	0.397
2ee1195e-4b7b-474c-97ad-9d339214d08f	0.0523	0.8374	2.3403	0.014	0.8418	1.2752	1.4729	19.0615	2.0689	0.4463	0.9088	1.9984	3.7971	1.6248	7.4289	35.5442	0.1969	2.0149	0.3826	21.1157	0.3753	9.9971	8.1613	6.0243	1.3678	3.2225	12.463	58.3457	0.4521	18.8946	16.6207	8.0176	0.3488	0.5664	2.371	4.9607	13.0695	2.8577	40.6782	10.3996	2.321	8.2182	2.7655	0.4	22.2817	0.2452	15.6429	15.0091	2.0875
c0db087e-6f6b-40ff-be59-d3ad636f5337	0.0738	0.5847	0.2781	0	0.315	0.2553	0.3328	6.1909	0	0.3276	0.3999	1.2033	0	0.1905	3.1098	25.8785	0.1206	0.9483	2.2568	6.0537	0.6762	2.5363	0.9567	3.172	0.6564	2.6764	12.6185	75.0487	0.2513	9.5584	1.9751	2.7855	0	0.0468	1.3905	1.0101	7.2379	6.527	22.0658	18.3787	0.1098	3.4272	1.0757	0.4163	27.223	0.2127	5.8558	4.6409	0.4179
6e364595-4cfc-450c-ad92-24a69c79c755	1.151	0.4065	10.1884	0.0359	0.7842	4.1985	2.7812	71.0318	0.2281	1.4328	1.9195	7.6981	3.6566	1.8607	9.0675	16.2985	0.1933	1.8028	0.393	9.9067	4.0403	4.7229	24.3775	29.4598	0.8782	3.1949	19.0711	80.0838	2.9389	14.6653	1.0719	3.87	0.7092	6.5921	10.4947	18.3924	30.4914	12.2388	386.111	11.1484	1.2011	24.6577	11.3353	0.3595	20.1472	0.229	26.3659	15.1559	0.3436
1a42ddf6-1afb-4a06-8a87-19837c3236c4	1.8824	0.9949	0.1952	0.0425	0.3769	3.708	0.6217	19.5535	0.0106	0.4704	0.9423	3.5072	2.8899	0.7353	5.5357	40.0091	1.4633	4.3722	0.8735	8.7222	1.9115	9.3314	12.9985	4.836	5.4046	6.9156	30.6669	97.6716	1.3441	34.096	132.39	2.3389	0.177	0.4243	7.0911	6.4248	9.2809	2.5328	43.5938	40.4216	1.0706	29.9923	3.925	0.9741	43.7833	1.4932	29.1642	26.7242	4.7257
3108a6ba-c776-437e-8a83-8c551abd3513	0.9101	4.0715	1.7963	0.118	0.7808	0.9114	1.0664	32.7203	0.6394	0.928	1.0681	4.0646	0	5.4154	7.5155	15.9082	24.8423	2.7762	5.9029	2.3036	2.5441	9.8252	17.5137	23.747	2.0977	2.4394	3.2647	86.9542	0.5052	32.6798	15.3854	18.2593	0.1801	3.3112	7.7383	9.2887	19.0071	10.0423	73.6639	10.4595	1.0139	10.2882	3.4361	0.4504	21.3743	0.1255	44.9775	3.8075	3.9486
6e9584a5-2bfa-4c58-8b19-03e4184282eb	1.3092	1.6072	1.5857	0	3.8224	16.2277	5.1757	17.5971	0.7361	1.042	4.2493	9.488	0	16.9312	22.3628	25.4946	6.2102	11.4815	6.9239	29.8225	2.45	24.2778	3.5776	2.8301	19.8253	11.0812	17.5219	122.45	1.3103	57.8086	106.384	8.9684	0.4901	24.6205	17.3054	21.8143	8.7559	29.9682	30.104	21.423	1.4705	14.9346	3.8942	0	53.8423	1.629	31.5336	28.5293	2.7076
0c36b561-2b38-4c91-81fe-b19248c44422	0.3978	2.1729	0.9068	0	1.6167	0.7454	0.7838	7.4641	0.0176	0.5508	1.7238	3.6527	0	0.7786	7.2134	12.0286	5.4176	2.9048	2.132	25.5369	0.6459	2.6278	4.4166	1.3665	0.688	1.5255	14.7147	20.9917	0.5249	15.8685	12.2393	6.2706	0.0982	0.3568	5.0048	9.3806	14.7546	3.207	29.7467	7.6781	0.2019	6.7278	3.0331	0.1351	21.1026	0.32	15.9724	15.0299	0.7231
b30e9f3a-ecb5-4fb6-8861-80861f4075b4	0.0276	0	2.1536	0	0.53	1.0914	4.6017	16.3013	0	0.7253	1.2688	2.3244	1.6042	2.0779	5.2481	11.3397	0.2642	1.3041	0.194	7.3963	0.3537	12.3524	3.6212	5.1411	1.1558	3.0176	9.6217	35.4582	0.1313	16.7998	2.4369	12.3678	0.1719	0.1216	9.453	0.4304	7.6911	5.0739	30.8447	6.8665	0.6894	3.6482	1.8545	0.6759	15.2466	0.0377	19.3319	5.4443	0.3618
556c5d88-4709-41d1-8bc1-c2f383c1e3ba	0.0176	5.3912	2.0295	0.0375	4.8814	12.6099	2.6745	11.8031	0.0343	1.6589	2.4573	7.6049	1.6988	9.4496	9.8819	18.7956	0.513	3.2126	0.2054	19.3312	1.8275	12.4894	4.765	4.7736	1.7577	5.5116	21.9097	81.1382	0.5088	32.6413	56.5331	18.2698	0.1691	9.1431	17.256	4.6123	16.5886	23.7896	29.3485	15.7107	1.9949	8.8524	3.0161	2.0398	39.0238	0.1895	24.7749	14.9731	1.3171
d7a5b190-77d1-4766-9f0e-0e9f0c083717	0.771	1.6286	1.6829	0	1.9597	6.4529	1.283	54.9469	0.5616	0.365	0.6593	2.9371	0	3.1513	7.6456	20.5165	3.0322	2.0178	6.3214	5.7829	3.4016	3.9411	18.9002	11.4182	1.1861	3.8192	7.1459	65.3158	0.6634	20.0238	4.4714	13.7093	0.4893	0.1792	13.9796	5.534	15.5208	4.7592	74.2961	10.285	0.673	6.9044	3.0518	0.3543	30.1912	0.2469	39.2676	6.1504	1.4701
741e51fd-4360-4e80-9a34-50a22df1f43d	0.0959	0.1612	0.253	0.0787	0.5583	0.7188	1.5628	132.054	0.0628	1.4322	1.8562	4.6121	0	0.4951	3.9831	28.653	4.5962	2.4287	0.5607	7.9183	0.0325	2.6936	47.1064	96.0316	1.6077	4.1691	31.7675	64.2397	0.5336	27.8876	2.2246	17.8783	0.0983	0.4663	3.9531	7.0831	6.5121	2.4061	272.681	24.3759	0.8564	13.2494	6.6351	1.1724	32.2525	0.93	54.6847	15.9998	2.7759
468bbe56-015a-45c9-9d2b-f47a0151c9c8	0.5155	1.6815	0.0796	0.0099	1.769	0.4061	0.6237	26.2075	0.1187	1.1696	1.0189	1.6853	2.6949	5.7969	14.4504	22.2037	0.1151	5.2866	4.3444	13.2253	4.3641	7.6977	8.0288	8.2322	2.1482	3.8469	4.9032	40.8998	0.5866	20.5155	71.747	9.8848	0.2063	0.4084	8.3665	6.5336	9.4001	2.3619	53.3675	9.4064	1.2479	17.0012	1.4459	0	38.2192	0.7753	38.0117	12.1516	2.2414
73e00413-cf2b-40a7-b672-aa91127bf4a4	0.5595	3.6566	4.012	0.0249	2.1318	6.1014	1.4662	7.7508	0.6391	0.581	1.877	7.0571	6.764	12.9461	16.6805	20.6194	0.1547	3.0834	0.1363	11.8686	3.0726	21.6447	4.4906	2.4026	2.0478	4.6301	10.843	115.712	0.7676	28.545	154.866	53.9889	0.1295	5.2614	9.3396	0.1512	8.3409	23.8743	25.0501	10.1675	0.9021	5.3006	2.0337	0.1425	26.7575	0.2184	18.4333	15.5051	4.2431
e5ee0383-6fc3-4bd8-a7a7-5cf2c6e2bb99	0.5677	1.4804	1.6195	0	1.0514	0.8438	1.2369	50.7141	1.6141	0.4902	1.7068	3.15	0	2.9899	11.6966	28.7081	0.1145	2.0009	0.6722	12.8661	0.4597	6.0417	9.8968	13.1657	1.598	4.003	10.8145	114.102	0.3336	29.0671	8.8345	35.9113	0.2235	1.1355	12.0837	1.1854	14.4807	6.4751	64.1263	13.439	2.209	7.0296	3.1127	0.7906	26.8648	0.1224	42.3474	13.1954	0.3527
864b0ef0-a8f3-4944-84c3-09c2ae8e865d	0.4439	0.3359	5.1248	0.0144	2.2059	3.9328	3.2572	16.4239	0.1432	0.3177	1.8144	7.42	9.7584	13.1814	15.7	33.1123	1.2025	4.2198	0.4326	16.2028	1.2019	24.5936	4.1787	4.1595	2.902	5.7023	30.3346	108.435	0.5156	31.7652	292.022	24.787	0.1793	6.7195	8.9943	5.8351	10.4964	24.4682	24.2818	13.0774	0.5495	4.6611	2.7114	0.5756	30.1135	0.3438	14.2525	34.1757	1.9259
966a5b1e-7050-4fa6-9a22-0a7b9eb06dee	0.6334	0	9.0799	0	3.235	2.9306	4.0971	14.8008	1.3069	0.4923	1.7314	2.2196	0	4.3555	8.2996	23	0.3322	2.7409	2.3316	16.9483	0.9487	21.5266	5.1589	5.5158	2.5041	4.1035	27.3117	56.243	0.5825	31.1008	65.2998	21.493	0.5558	3.1911	10.5953	2.3915	13.2477	8.2997	24.9464	15.549	2.0508	8.2471	3.5753	0.478	33.1815	0.6927	18.2589	20.0798	0.5757
23a10977-df02-4d0c-8619-ec72734a688e	0.3076	1.2177	0.2389	0.032	1.4384	2.0245	1.1637	9.6606	0.1917	0.7479	1.2685	4.6096	2.1768	3.8264	5.5166	29.0908	0.1062	3.1212	6.0533	2.1037	0.6123	25.051	10.947	5.8076	2.3358	3.4041	9.858	59.317	1.142	31.6179	39.0702	3.5235	0.1	5.443	7.3705	10.1655	9.6331	8.6267	37.2462	21.0744	0.8709	11.4294	3.656	1.1923	33.3007	2.4284	22.987	14.2148	3.3754
23724e26-dcba-4d15-8483-3e23b6f8bbab	1.4288	0.0474	0.5772	0	2.0515	1.823	1.4089	41.126	0.0485	0.4387	1.5758	6.7453	0	1.3772	18.201	30.3149	1.3453	4.7679	0.0889	16.3511	0.7377	15.2636	14.7136	35.997	0.4733	2.5036	43.1599	43.6503	0.5087	43.6362	12.2533	12.745	0.2026	0.6684	7.4087	5.5929	14.9774	5.7563	74.7185	16.2371	2.3854	8.6357	3.921	0.4646	39.274	0.0518	25.7758	18.9254	3.9169
eb548f5b-1bfe-4306-9fee-3491aa7f6d42	1.0137	0	0.2396	0	0.7627	0.4221	1.1774	65.8236	0.0663	1.0731	1.1993	5.9109	0	0.2387	4.3669	36.2227	0.2046	1.005	1.0918	5.8454	0.6669	1.4098	20.2977	7.9832	1.0679	1.6225	35.6192	105.557	1.0176	14.4263	3.5067	2.4629	0.0395	0.9408	7.0342	1.4175	29.4167	3.1953	103.818	20.4431	1.0323	8.4271	4.9085	0.8696	31.7624	0.0303	46.1419	14.3384	0.9456
b98c0e04-42ba-4053-8853-31ac9a05362b	0.6231	1.2406	2.0435	0.0105	0.8294	0.6498	35.4834	24.5488	4.0902	0.7981	1.205	5.3246	2.8474	0.9879	5.26	21.5374	0.3908	3.1506	1.5779	26.3573	0.2923	9.0292	10.0427	9.2601	1.9642	3.1931	18.5098	39.7661	0.1642	24.0935	14.5696	13.6498	0.0654	0.1079	7.5879	5.7937	12.2073	6.5103	67.2388	10.0838	4.0822	6.1253	2.3469	0.5998	45.43	0.1337	22.4913	13.309	2.8499
d2ed3ebd-b669-45b5-9ffa-ebcf385a8dca	0.3617	0	0.0985	0	0.4563	0.4017	2.604	16.0506	0	1.3181	1.8609	6.2825	0	0	13.3189	8.3355	0.2846	1.2509	3.3489	5.2198	0.3768	8.2557	5.3714	7.4105	1.028	2.9369	16.4561	24.4971	0.3363	60.7863	55.2448	10.7396	0	0.3728	12.3851	8.0838	10.1251	2.5554	39.2385	8.5425	1.8794	14.3871	2.4485	0.4914	26.561	14.2088	24.4575	27.8909	1.3152
8b9f9820-e202-4ccb-b038-cd8e2ce499e2	0.5486	1.4148	2.4252	0.2164	2.708	1.0729	1.1506	17.5408	1.3206	0.9075	0.7443	3.0214	0	1.801	4.0625	24.0597	1.6467	1.3187	0.2441	19.958	0.1579	9.5986	7.266	8.4682	1.6711	1.8008	10.0934	79.8313	0.8241	20.0114	32.026	14.3275	0.106	1.0325	9.0396	5.9914	19.0641	4.3849	34.3773	14.5922	1.5384	4.0869	3.2292	0.0729	25.9033	0.3454	19.0465	11.8124	1.9026
4e950112-41c0-4ff0-9d0e-75aafaf5df2d	0.0073	0.5945	9.3137	0.516	2.2175	1.4093	1.3163	17.0098	0.7175	0.7303	2.1233	4.1587	4.2508	1.1799	11.2179	27.0172	0.1167	3.3356	0.2141	30.1721	2.5047	17.3861	4.4449	6.4088	1.9549	4.6013	39.4478	51.8045	0.3954	27.7827	14.6987	23.7077	0.2278	1.8219	8.393	0.7604	16.8523	11.339	49.6856	16.1911	1.2755	8.5285	4.9911	0.6269	37.1554	0.5741	15.6571	14.9253	0.4195
25b2ac45-2875-4708-83a4-ec3f9bd03427	0.2694	0.4484	0.044	0	0.5436	0.2468	2.7514	13.1413	0	1.1778	1.6989	2.4842	2.6052	0.0603	17.2112	11.1818	1.3032	1.7354	3.3073	6.377	0.2773	9.663	5.8373	4.6474	1.3977	2.4502	24.9619	28.6922	0.2036	34.4131	76.2316	55.739	0.0399	0.2838	7.2173	5.9416	9.8477	1.4395	23.6225	13.5402	1.4863	14.5252	2.5794	0.5488	15.3517	14.0727	11.8697	24.7321	2.6442
0c2dc588-b89c-4a9a-9230-670c6a6af744	0.4554	1.3624	0.953	0.0405	1.5558	1.8254	1.687	21.6314	1.2222	0.7966	1.738	3.1024	0	6.4312	5.2734	23.3844	0.1008	2.3933	0.3329	29.681	1.2558	5.5159	8.0875	8.8225	1.5192	4.5656	13.6924	61.4734	0.4917	45.8874	7.4834	27.5652	0.0843	0.6519	8.7162	0.9497	15.398	4.5109	28.6323	12.0639	1.6929	7.3724	3.2538	0.6959	23.8142	0.2263	16.7045	10.6357	2.7166
e19310ac-8dda-4550-8f1e-6c393edac919	0.6898	3.5935	0.4641	0	0.674	2.1118	1.5988	16.3725	0.1603	1.1215	0.7431	4.3461	12.6847	4.1401	0.7503	54.1173	0.6621	2.2199	11.0197	4.2651	0.9108	5.1111	13.1467	11.3476	1.1667	1.8119	22.0867	120.715	0.8758	32.839	8.4512	3.2905	0.0432	1.3216	6.3217	9.2021	16.9793	9.8286	62.1907	23.1252	1.1278	10.3209	6.8678	1.0689	39.4217	0.3476	24.9362	23.4746	0.9934
23ce4368-9d6a-4fc8-a1aa-661414dbc180	0.0473	1.8302	0.1622	0	2.7674	4.4502	0.2624	23.4017	0.594	4.1352	1.4087	1.9369	2.7439	4.2523	15.5395	16.8701	0.3459	4.7658	1.2349	3.746	5.57	8.2846	7.6208	4.4907	1.4161	6.1235	9.0538	19.1778	2.2496	53.0544	6.8007	3.6538	0.5742	0.4808	12.3961	9.951	27.9827	3.0497	67.816	10.9758	1.0707	20.1255	2.8259	0.3854	45.5808	2.1159	33.2218	11.639	0.7736
0c529207-dece-48c3-9968-d9244749ad82	0.8751	0.9994	1.6994	0	0.9064	0.8533	1.2583	19.5744	0.1098	0.5786	1.5037	2.7226	1.0321	0.6685	6.9035	24.8926	0.9382	1.6082	0.728	11.6351	0.824	4.4779	16.3088	10.4284	2.8638	4.1415	23.2396	55.0414	1.0792	22.7237	2.6819	13.9762	0.1896	1.0265	5.2105	6.2048	19.73	5.1328	90.9086	19.9066	1.2695	16.6843	3.1408	0.6088	51.7244	1.1515	39.885	18.951	2.2407
7c04785f-09ad-4e68-8e6c-3b60c1efabd7	0.0661	2.8646	2.2662	0.0157	2.1854	10.1807	1.3609	20.5606	0.0547	1.2712	2.4384	12.3457	0	8.7701	10.7292	26.7257	0.3509	6.2531	2.876	13.4153	2.2349	10.1233	6.5761	6.4903	2.4817	6.7335	24.072	134.395	0.7926	37.5405	154.042	8.7969	0.2283	9.4828	16.0366	5.3345	14.304	40.4647	37.668	18.6151	0.7891	7.9677	2.2858	0.6282	27.1681	0.2001	23.8101	16.2329	2.0419
e123d08f-fa8d-470a-999d-174f5c0dc04a	1.7177	1.2061	0.4874	0.0245	0.6177	1.6537	2.4966	12.8406	0.11	0.7227	1.9252	4.8662	1.11	0.7959	10.4546	12.1691	1.1918	2.5817	2.9302	5.5749	1.1815	9.08	6.9272	4.0655	3.5733	4.1204	23.1187	35.4573	0.3965	56.0482	79.1165	21.3306	0.1869	0.962	10.4262	10.0696	7.7949	2.7283	38.1954	19.1459	1.3405	16.1788	2.6066	0.6548	28.1502	1.6424	23.373	19.0153	4.663
54cba4ae-6077-4679-bd8b-d12451ecf78d	0.607	2.2197	1.9227	0	0.5797	0.1408	1.6404	13.3333	0.0046	1.9339	1.4838	2.1812	1.2581	0.5529	31.6383	15.4353	0.1765	1.5767	0.2028	4.0563	0.44	3.8124	13.1552	7.2891	1.0221	1.5544	8.0135	13.38	0.2949	34.239	1.8105	3.3027	0.0385	0.2324	5.6762	6.7755	15.485	1.0787	70.5222	11.9239	0.6991	7.6774	1.937	1.0601	15.0752	0.133	30.5894	7.1888	2.9086
2d5509a1-627d-4182-b727-a6c8f27182e2	1.1947	0.6421	2.2872	0.0338	0.7185	2.4711	1.3021	16.4793	0.0758	1.0379	1.8953	6.7662	0	2.8142	12.2209	31.7307	10.8256	3.9527	0.0463	9.5657	1.1519	17.5622	4.8771	5.1825	3.2024	7.4866	11.32	152.744	0.6663	40.6033	14.683	37.8025	0.1406	3.142	6.3396	11.6593	11.8878	19.0706	26.6424	25.5593	0.8674	9.4333	1.6423	1.1607	42.1285	0.2696	24.6337	10.7429	3.042
8fd3b86a-031a-44bf-840c-2b631d9e704c	0.435	2.6094	2.0897	0.0182	0.9468	1.3641	0.6131	20.888	5.3487	0.3133	0.4464	5.2105	0	1.1449	6.9369	71.4836	0.151	2.4311	4.5386	10.1561	0.7903	8.3196	10.8449	6.4861	0.8347	4.5867	20.3809	80.2775	0.175	16.7802	79.4476	62.5847	0.2274	0.8088	4.0269	4.6328	8.5571	8.111	57.5223	12.107	1.6321	25.2519	2.8996	0.9385	50.9449	0.465	12.6468	10.7242	0.8374
f6c23150-8009-4de9-919d-8814973af20b	0.7172	0.8067	2.865	0.1103	0.4564	1.6144	0.6478	12.3212	0.6328	0.5425	0.7804	3.5057	3.7495	7.3716	11.4985	53.8512	12.2259	5.2599	0.1133	24.1779	0.7127	35.0482	2.0225	3.6995	1.4369	4.1525	62.5629	99.8326	0.4465	42.4279	81.5379	27.7977	0.0574	2.1131	2.3083	0.1078	7.2595	15.3953	15.9122	18.8191	0.4862	5.1523	2.0506	0.3949	43.7283	0.5944	2.9537	25.6801	1.2157
f0339554-e555-43cd-be40-a1fc6d5c53ce	0.9433	2.3412	3.5424	0.0165	1.9702	1.5456	2.9692	43.5281	0.2634	0.6897	2.2881	3.5564	0	2.2833	10.3001	23.5358	0.1506	2.1531	0.2713	22.3763	1.5352	2.7492	10.6872	15.1947	1.7196	3.8082	28.6083	67.3363	0.359	28.3749	1.7937	46.6755	0.2405	1.6894	10.6749	2.5369	16.2377	8.4212	57.4996	14.4046	1.629	9.3769	4.3149	0.4726	30.8242	0.6323	32.625	17.3731	1.0121
c61f1eb8-556d-4121-b3fb-c3e239b370e7	0.4714	0.0485	1.3452	0.0332	0.1829	0.673	0.7055	10.3154	0.0937	0.598	0.5944	3.7412	0	0.7648	5.5803	12.3835	0.11	0.9673	0.1514	5.0245	0.2971	2.3395	2.2202	3.4405	0.5299	0.9536	3.4904	27.6459	0.3635	14.8306	10.7547	65.0479	0.1151	0.7047	2.4851	1.8916	8.1526	2.2623	32.577	4.9781	0.4788	2.0059	1.2856	0.6966	17.1709	0.353	9.12	5.3024	2.2883
55510438-6d21-4309-928f-9f86786312cb	0.3096	0.4117	0.0843	0	0.6943	0.0716	0.2061	15.6151	0.0794	0.1504	0.3232	1.092	0	0.0385	4.8373	28.3775	0.2131	0.958	1.7099	6.3923	0.1897	6.7222	2.4853	8.2474	0.5611	0.9907	18.0308	41.7487	0.1981	7.0258	3.3255	4.6439	0	0.0552	1.7266	3.5926	11.8625	1.902	33.2299	6.9518	0.2465	1.9137	1.104	0.4206	21.0559	0.0586	6.8012	4.9673	0.7036
e26b8de2-31b0-4ed0-b429-383d20eb53b5	0.6318	0.2333	1.448	0	0.4799	0.2886	0.8353	34.2776	0.0362	0.4278	0.547	3.5886	0	1.3223	4.1349	18.6825	0.3487	1.4912	1.7478	8.0891	1.9034	7.0834	15.6722	8.776	0.9368	1.108	14.4907	71.1016	0.1247	9.3911	5.0433	3.8454	0.1811	1.5684	2.5486	7.7576	9.6023	6.8358	49.4228	4.9722	0.5988	5.1407	3.2598	0.2492	13.2343	0.1157	19.0125	15.7056	0.389
2798a8ec-9cbb-490f-86ea-b91810385319	0.0568	1.2409	1.7739	0	1.7551	0.745	5.2908	35.4668	0.8011	0.6705	0.8574	1.7856	4.1196	0	11.4151	26.3684	0.2764	0.9302	0.083	6.1679	0.094	0.1364	7.5212	16.3889	0.0632	0.9858	10.9981	49.893	0.5978	38.0706	1.8115	14.7044	0	0.2926	2.6086	4.2109	22.409	1.4128	82.6205	6.6123	2.3808	2.0256	2.1142	0.1736	17.1757	0	21.3133	5.9194	1.1615
001cfe8f-6e1d-439a-ab55-629f8bfb1c25	1.2659	6.0628	1.4232	0.0555	1.1812	1.1916	1.755	41.4283	2.6308	0.8644	1.9374	5.2342	0	2.735	6.2501	48.329	8.1497	2.6559	0.1521	8.55	1.5876	5.3741	35.2011	36.8579	2.1597	5.1945	41.3118	158.825	1.4136	44.6582	1.3074	4.8816	0	1.3702	7.3903	10.2704	16.778	18.5989	129.013	18.6526	0.6338	11.3101	8.086	0.53	41.8333	0.2659	32.5137	13.7989	2.6245
026f4587-5b37-4312-a374-c46ee36829ab	0.5943	0.0976	3.2489	0	3.1089	4.4546	1.1005	28.4358	0.3596	0.755	2.04	7.485	0	6.2133	20.7536	20.675	1.6055	3.4428	0.1463	15.3706	1.9871	9.1368	6.2661	5.5876	1.7807	5.0607	13.7074	121.522	0.3242	17.7559	49.7017	36.4049	0.1112	7.9511	15.4843	4.3135	11.7698	32.1276	39.2727	13.1332	0.9414	4.797	2.9639	0.8412	27.2609	0.5755	20.6746	21.9704	1.9958
3a39e135-430b-4858-aa0a-54d3a68db335	0.2975	0.5804	1.1743	0.0617	0.5316	0.826	0.8989	20.7316	0.5411	0.954	1.4057	4.2465	4.7958	3.2169	24.9468	29.5273	5.9976	5.2996	0.145	14.7977	1.4129	11.1576	10.706	7.9875	1.746	7.1062	3.5882	111.265	0.2141	30.5432	7.381	21.4599	0.0184	3.0661	9.1949	4.4425	6.964	15.6939	33.5177	13.5322	1.0571	3.8951	1.4979	0.6567	27.7098	0.2675	35.0992	7.253	1.9606
69c4d355-ccb9-4e0b-8e29-c15a242a4cb1	1.0559	2.4587	2.3072	0	0.4752	3.7792	1.0473	16.1856	0.4861	0.8086	1.3328	2.5021	6.6244	2.6813	6.9776	17.5717	6.3446	2.8327	3.4373	7.3336	0.7555	12.0661	2.8037	8.3401	5.6866	3.0691	9.9328	59.2314	0.3451	26.1636	2.3171	8.5404	0.4057	1.7255	6.2338	4.8139	5.5476	7.9831	27.015	11.6454	0.773	5.4965	2.3866	1.1862	20.3879	2.606	18.4407	3.8889	3.6419
0a238ed3-971c-48a5-b34d-eafa4e4ed448	0.9332	0.3759	6.0477	0.1071	2.8354	8.3496	1.8223	10.0271	1.0363	1.8956	2.8281	17.3079	2.9117	8.149	12.4268	22.0236	0.0888	4.7668	0.8801	10.1259	4.361	7.4732	2.1264	6.0216	5.3561	8.3128	8.714	128.273	1.3218	25.0545	200.781	26.5263	0.2229	8.8389	20.1278	1.9531	13.9594	48.8756	40.3923	18.62	1.8553	7.8742	2.4452	0.368	30.3969	0.3761	39.861	15.5304	4.6792
bfcc7d54-3213-4263-a8f0-0479eccb4da0	1.2787	1.2605	6.2838	0.2714	3.4335	8.1466	1.9662	23.4689	1.2419	0.6278	3.8837	11.1781	0	18.9706	19.4883	27.9557	14.7854	8.0476	4.1975	27.2611	3.7282	5.569	8.175	5.5834	3.8251	8.7063	13.847	161.039	0.5086	38.285	142.423	55.7222	0.2326	12.3617	21.3729	7.014	12.6697	48.2044	41.4737	16.7502	1.7202	8.1731	3.4868	0.1828	33.942	0.5606	32.0141	30.9105	1.2235
da44bb3a-dcb0-4894-a51e-1759334203e7	0.0091	0.0856	0.8662	0.0325	2.253	0.556	0.9398	1.9089	0.4381	0.8317	1.4296	3.5924	0	2.0661	5.3721	31.085	0.0647	1.4928	0.0535	9.3111	0.5177	9.2555	7.2808	9.8572	0.6643	4.0064	1.6927	149.087	0.1448	19.471	3.3587	16.1602	0.0135	1.0052	3.8424	2.2713	15.6284	7.01	49.029	14.3083	0.5832	2.8266	2.2694	0.4844	30.2826	0.0727	80.7606	4.9843	0.4239
80aedc57-c277-4633-9b3f-ef64be5a18b2	0.0993	0.8847	2.1332	0	1.946	2.7159	10.6785	20.5403	1.5056	0.2913	1.9881	4.6932	11.8694	0.4902	3.2249	18.602	0.0931	2.6372	0.1708	12.828	0.6317	9.5745	10.0612	9.784	2.3134	3.1188	10.7797	64.3037	0.3723	24.6474	92.5576	13.829	0.0649	0.7026	1.4615	3.7426	8.7155	12.1799	57.5102	10.6274	2.4875	15.0669	2.114	0.3572	26.3577	0.1892	29.0254	5.9631	0.741
b4094962-d358-49c7-85d9-a3d1cfab2214	0.8431	2.8872	2.0253	0	1.239	2.2293	1.8425	56.1004	0	0.4725	2.4221	7.6177	0	0.5493	7.921	25.0038	0.1159	3.0971	0.2872	8.0337	0.6681	7.5509	39.7741	22.0465	2.6941	7.7851	50.1314	50.2475	0.5833	28.6514	2.7533	1.8729	0.0727	2.0246	3.2794	0.2428	9.5252	33.1244	90.7749	22.9938	0.8446	14.2429	5.8727	0.8005	25.301	0.0837	55.9764	11.6454	2.6784
4f86342d-56a1-4508-9f90-58530b3bd952	0.0548	0.2565	0.5704	0.0439	0.2591	4.0895	1.7358	22.5039	0.0365	1.617	2.2608	3.1743	0	2.1141	6.0212	16.3117	4.4002	3.7241	0.4004	13.3166	0.0755	9.805	11.4768	9.4734	2.0713	6.3695	11.5057	67.7582	0.5323	34.1534	5.9573	12.0406	0.2738	1.0539	5.5048	4.3541	6.6867	7.2689	48.2756	15.8455	0.9128	5.9842	2.9871	1.0883	23.8421	0.8867	24.6638	14.0311	3.7534
3d4c462c-32a0-4858-bfef-e48b7091555e	0.1449	0.5477	1.9437	0.0489	4.0223	8.7302	0.9813	6.8176	0.398	0.6405	1.4282	10.307	15.4947	34.1494	11.9348	17.7394	0.3511	10.6215	0.5799	3.5947	4.6448	10.8861	0.992	1.258	2.8842	6.6891	16.6626	163.867	0.1812	17.4734	971.399	25.6781	0	8.8161	6.035	1.8242	4.5918	54.2372	6.0514	9.0233	0.4756	2.6821	0.7803	0.6528	22.9267	0.3899	13.8084	14.95	1.4354
b5c14cec-8923-416d-a2d9-8202c9ddf561	0.0842	0.5517	1.354	0	0.2902	0.2594	1.2631	25.4471	2.1176	0.53	0.7794	3.3166	6.5123	1.0544	3.5187	16.3155	0.5016	0.5377	3.5924	3.8563	0.8355	1.294	11.9978	5.7445	1.0482	0.8879	18.17	17.438	0.1514	12.3077	4.0026	5.9886	0.1745	0.1966	4.7968	10.6506	14.1598	1.4269	26.0186	4.4798	1.2364	9.9279	5.8909	0.5488	13.068	5.8981	23.2589	16.8397	2.318
29ddc0f0-206c-460b-92e7-f27f244799be	0.5796	0.1064	1.7123	0.0546	1.7632	0.7667	1.2254	28.0097	0.1724	0.7156	2.4364	4.9616	0	3.5466	11.8829	49.9212	0.1056	2.918	0.1495	19.5134	1.523	9.5829	10.3441	18.3894	1.289	4.6108	20.245	117.846	0.2301	36.8939	5.5364	34.1558	0	1.2298	12.5286	2.4964	18.4694	8.4819	57.5536	22.5577	1.301	6.0151	3.5513	2.5008	28.3762	0.4066	23.5896	18.8605	0.2092
a4332ff0-9696-4327-8b18-d956b9b5cade	0.5197	1.0239	1.0749	0	0.806	0.9154	0.8703	14.1784	0.1406	0.6035	0.5145	4.5002	0	1.8583	3.6836	15.5447	3.5515	1.7514	1.1457	25.8985	0.2819	2.5175	6.4827	3.9026	1.08	3.0129	23.7542	22.9223	0.046	14.8978	3.0634	21.3795	0.2271	1.2293	3.6525	2.3373	11.3008	10.7154	37.5513	8.3766	2.6008	7.5535	3.4536	0.7291	15.5208	0.2177	40.579	14.2911	1.5682
f897b817-b897-4259-a41c-053cd6c2fc60	0.4593	0.2868	1.4704	0.0915	2.1939	7.6053	1.1121	10.5582	0.2478	0.8355	2.3424	10.3208	1.777	6.7406	13.6237	33.3355	0.5529	3.19	0.2507	8.8403	2.0265	13.918	6.1052	3.675	2.5061	7.2687	7.9826	201.225	0.7538	50.8681	55.2654	46.4092	0.0816	5.529	10.0803	4.7112	9.12	34.4331	45.5418	17.2945	0.8426	8.2538	2.0634	0.599	33.6311	0.4173	28.4129	12.5282	0.501
8d858683-bfc5-4e08-8a99-69dee5db8fbd	0.2033	1.7577	0.0383	0.0167	0.4932	0.2931	2.0119	13.703	0.0583	1.6825	1.1492	3.5689	4.5384	0.105	13.9902	7.4241	0.9137	1.7166	2.3321	2.9661	0.1553	6.7636	2.9377	6.2692	1.6001	4.0538	29.7928	25.164	0.5995	29.7827	15.2396	36.331	0.0347	0.4836	7.4042	6.2047	8.787	1.8591	18.3716	14.4536	1.1601	16.4377	2.3174	0.6693	18.177	12.4445	11.4503	18.8785	2.3032
50329f23-1aae-44b9-bf88-4aba63f445a7	0.1278	3.6661	0.2471	0	0.1074	0.0504	1.7976	13.3429	0.6037	0.2705	0.5775	2.3195	22.1114	0.2708	3.9858	14.9279	0.0754	0.826	1.0222	3.7608	0.6873	3.4676	3.8427	4.3736	0.4486	0.3185	6.9092	11.9868	0.0411	9.2807	8.7871	8.6779	0.0797	0.0647	3.9923	0.8808	6.9652	2.8128	28.6228	2.9162	2.0719	3.1063	2.4037	0.6576	11.0272	0.0687	25.8369	3.8033	1.8702
3938ed9b-38d0-4c88-aaab-ac977798438f	0.4098	1.405	4.2954	0.0287	1.915	3.0381	1.0928	26.1406	0.6723	0.4935	1.4334	8.9553	1.9492	5.5904	10.1547	28.1555	0.5232	2.8719	0.5499	14.885	1.8227	5.7129	4.8204	11.3239	1.1055	4.9248	7.3304	105.198	0.4352	31.9313	85.4762	69.6342	0.2984	4.3755	10.4399	1.3448	8.7757	24.9197	49.4261	13.5573	0.8954	2.7897	2.2431	0.4106	21.1164	0.0229	26.8501	10.3529	0.9892
b242d26d-5e52-4d99-816f-e1cae3a36917	0.0071	0.0444	0.0523	0	0.1077	1.4222	1.0363	51.4683	0	0.224	1.8046	2.1987	0	0.382	4.8751	44.8009	0.063	3.4147	0.1664	14.9477	0.8633	16.7507	32.7572	39.2074	1.2342	3.4008	35.1957	57.2725	0.2842	47.8823	0.7427	1.7137	0.0632	0.3129	11.3297	0.1055	22.2694	0.2753	121.973	38.2911	0.9483	11.2929	5.9395	0.3479	24.1275	1.1394	47.4702	48.0855	0.6403
cd43d38f-230f-4a29-b193-683d1b97fe71	0.1572	1.7394	0.0467	0	0.0841	0.3094	0.4234	16.5889	0.0254	0.6497	0.1342	1.506	0	0.3196	3.1752	16.7363	4.9401	1.4042	0.7519	1.8391	0.3467	1.7391	3.1652	4.145	1.9489	0.8767	11.9774	20.4497	0.2879	23.723	2.3201	5.6638	0.0846	0.2029	4.3023	4.7496	7.5169	0.7372	36.977	7.6048	0.4607	4.2952	2.3067	0.4076	22.6603	0.2921	20.6833	4.7902	1.3636
2fdbb8fb-9a93-46e1-a62a-1141dd7da48a	1.4326	5.0527	1.2472	0.0488	5.7712	4.0037	1.105	17.843	0.1668	0.5651	2.0299	12.3479	0.9469	8.695	9.5043	47.791	0.1675	5.7678	9.7314	15.1974	2.3469	12.9201	10.9071	10.3296	2.366	8.4737	10.2389	241.082	0.5426	45.341	15.1789	12.4289	0.4494	5.1212	17.4886	6.5817	8.4537	28.3796	91.0885	29.915	0.7156	23.5042	2.204	2.5932	40.5361	8.0284	46.9132	12.1448	1.6018
035e7dc1-08d6-40da-a550-1d3fc1bfa2e7	0.7567	2.8776	9.455	0	2.3256	0.8079	1.2233	15.0068	2.6732	0.6137	2.7558	5.2159	9.9806	2.8625	11.0532	28.6539	0.7063	2.2875	0.4425	57.3688	1.0016	21.4517	5.0359	6.4916	1.5606	7.9873	34.7119	55.9055	0.7279	24.5464	80.9918	7.767	0.2139	0.5861	10.1647	3.2646	13.2506	33.3546	72.4146	18.2066	1.6416	11.7779	3.3526	0.6728	58.191	0.4219	23.0769	10.2563	1.7446
e263c200-6860-45ff-b876-6426246798c6	0	1.6992	2.8039	0.0894	1.3909	0.9765	0.9373	23.4736	0.5498	0.4394	1.2363	4.7395	10.1247	2.4355	8.2184	26.2261	0.4324	3.8066	0.1224	20.1155	1.3548	16.933	3.865	6.2336	2.1418	5.7473	26.9436	78.6311	0.3466	24.6644	38.7735	40.9294	0.031	2.8769	0.4096	0.2199	13.0685	16.9759	53.2993	18.779	0.8552	5.6539	2.7712	0.4266	27.5545	0.6183	16.7276	17.6613	0.9135
17af899d-b10b-4ed8-bfdf-e61393f5e983	0.0341	1.1434	0.2922	0.0182	0.4728	1.3622	0.3706	14.1466	0.2086	2.1009	0.926	3.765	4.9434	2.2868	10.3578	36.4084	0.1659	4.3395	3.8352	3.1524	1.2778	6.2212	6.0306	5.9312	2.5386	6.5064	14.6288	78.0193	0.3127	27.0119	7.707	3.5906	0.3784	0.4799	2.6303	9.7744	6.1529	10.7846	20.2159	14.7359	0.5311	3.798	1.8451	2.187	35.7845	0.2903	15.1033	9.6459	6.0628
198aea6e-88e9-4bf5-a08f-f32b01e017e7	0.4295	0.3781	4.6134	0	0.7223	0.3715	2.5102	14.9171	0.5217	0.3467	0.654	1.5432	0	2.1802	8.3742	13.7748	0.0877	1.3348	0.0966	9.7959	0.7166	4.0741	2.8904	4.8174	0.8082	2.0361	14.0423	66.4533	0.1724	15.8833	1.0219	62.3313	0.1468	0.4994	6.9553	0.2041	8.2242	3.7137	11.4426	6.3906	1.2903	3.4509	1.5984	0.0673	13.8204	0.4315	16.5314	9.8078	0.4504
7a94d8a1-ae96-43e3-a9d8-8953af78df94	0.0055	1.948	2.3677	0.0354	0.3204	0.3726	2.2565	72.2035	0.0059	0.3188	0.3669	1.528	0	0.1483	3.208	40.7498	0.3519	1.0131	0.1937	1.7518	0.0244	0.5041	5.0266	6.7796	0.5895	0.865	18.6648	112.621	0.0537	14.1454	3.9074	6.3182	0.0491	0.2656	3.8614	0.1331	9.3567	4.7323	37.797	9.1041	0.3206	3.5596	2.6083	0	19.4113	0.5269	26.9861	23.607	0.0452
50c073dd-0937-4cb9-b7b4-f08926bbbcc5	0.058	0.0844	0.3218	0	0.1364	0.1545	0.4823	146.232	0.0082	0.5271	0.8555	2.5266	0	0.3111	14.7965	55.7778	0.253	1.6517	7.1608	5.1239	0.4858	0.4269	42.5138	30.8634	0.189	2.9571	11.1236	131.225	0.4171	19.6485	2.9127	3.2336	0.1716	0.2124	11.9983	13.1197	14.4003	0.2563	211.05	13.1662	1.2292	7.4115	5.2648	1.3225	38.604	2.2905	46.1342	15.1421	0.6637
2202d90a-e346-46df-a49b-09ffb7b22cf6	0.6906	0.9594	1.4502	0.0243	1.7805	5.1577	1.0551	27.0212	0.3636	0.5774	3.8344	8.2216	0	3.6161	7.0534	23.3391	0.7523	2.7907	2.4627	14.2689	2.7874	15.0407	12.353	6.6396	4.3881	5.7658	9.375	77.4223	0.4752	20.7816	13.5998	15.3311	1.2643	3.2432	8.9762	9.2141	8.0361	11.7264	94.1614	26.003	1.762	50.0562	3.4244	0.6494	31.8071	1.9652	52.6952	7.2575	1.9556
f713691a-df6d-4c44-a9bf-81d45ea69d61	1.128	1.7373	0.1464	0.008	1.1873	2.6879	4.31	12.9316	0.2982	1.2936	1.8121	3.8117	3.2514	5.4147	14.4978	15.2567	6.162	5.6288	4.6082	17.7292	2.0023	23.4021	5.1626	3.7984	2.4921	6.3271	8.4887	56.2777	0.6493	53.5169	114.464	18.8363	0.4148	2.3456	9.6652	15.7863	5.7788	7.8056	21.5238	16.0705	1.7746	12.0093	2.0001	0.3196	34.6191	6.5545	20.7442	13.143	4.9196
4a97b6ea-dabe-45f2-8824-45690886e506	0.4045	0.8901	5.1498	0.0566	2.4089	3.1315	2.9853	11.572	1.5884	0.6611	1.802	4.0983	3.8481	6.0079	16.1343	19.2743	1.209	2.433	0.3102	18.5646	3.5839	17.7779	4.9818	3.159	1.5042	4.3581	25.6833	58.9117	0.4582	21.9046	64.4539	31.783	0.1178	3.2074	8.7316	6.1582	12.3878	11.731	28.575	11.5688	1.4968	7.484	3.3313	0.4864	28.9609	0.1808	18.7208	18.7823	1.4104
2109e5d5-43e6-4ca8-bd8c-8f34489437e8	0.2444	1.8973	1.7804	0.3385	0.9833	3.1694	2.162	11.9476	0.2391	0.832	1.0107	2.5401	1.9169	5.4093	10.3879	20.6846	10.9575	5.1078	0.5022	5.1783	1.7343	21.3625	0.9863	1.1802	4.4666	4.2566	19.6995	90.2534	0.2568	27.376	138.776	61.0833	0.0587	2.315	2.0568	2.9146	5.0075	17.7141	5.3272	10.9888	0.5255	4.5108	1.0136	0.4038	19.8862	0.4502	3.7548	10.7819	2.4321
547667b4-173c-4ead-b64d-b0d374dbd0e7	0.118	0.1579	2.7263	0.144	1.7865	1.306	2.5515	16.1358	0.718	1.1502	0.7467	2.6052	0	2.9421	5.5872	40.6755	0.5372	1.5742	0.1972	8.6037	1.153	17.1743	4.872	3.0894	2.3249	5.7993	12.1366	129.057	0.2002	15.3127	3.7158	11.0663	0	1.3206	4.862	2.9067	9.6225	9.0418	22.0331	20.8156	2.4648	4.0808	2.2571	0	30.9974	0.0575	27.6025	5.5526	1.5173
0861ee92-a3c8-4ab1-ac17-1e89b85284ee	1.1832	0.6734	2.9787	0	0.6761	1.666	0.8532	24.1493	0.3062	0.5145	0.2895	4.2045	1.8967	2.0619	20.5654	16.0544	2.6382	3.769	0.1529	3.9517	1.8025	3.1722	11.6479	14.4327	2.7331	2.3434	16.8559	66.6175	0.8469	37.0691	7.5822	11.6116	0.2033	0.8713	5.4048	6.3737	26.9011	4.6258	41.9824	11.4528	0.8853	7.4276	2.1631	0.5594	37.1425	0.1114	38.0001	6.087	2.2995
1e670d11-7516-4e03-8ec9-8a08514efb78	0.9092	2.4625	1.2775	0	5.6163	11.2757	5.7541	11.714	0.3061	1.0875	3.1492	7.3029	3.8797	15.7935	20.8828	18.8502	18.3781	11.1589	5.3553	30.6571	3.1561	15.2256	4.4109	3.093	5.5904	7.7513	22.9854	81.347	1.126	71.3778	259.31	60.9677	0.4158	14.2303	15.491	16.1848	7.3327	22.9154	25.9168	18.3358	1.581	9.5382	3.1073	0.4904	40.1838	2.1413	35.5598	27.5478	2.3517
e8789595-7a45-497f-8d41-ef297d9b3378	0.3015	6.1911	0.8536	0.2718	1.7918	0.4855	4.639	8.4398	1.4267	0.8438	1.2409	3.2504	11.6652	4.0922	9.1645	46.6991	0.3202	6.7719	4.623	5.8526	3.784	13.3926	2.0007	3.2841	2.0862	3.8302	2.9626	90.1391	0.7668	31.7054	50.5176	14.5449	0.4465	1.022	6.6857	5.1048	3.2265	4.4822	27.205	13.5227	0.6482	8.1769	2.3684	0.7372	27.2856	0.4794	12.7906	7.2938	1.4252
3394c05b-c0bc-4da1-812c-852a4030d53a	8.8133	0.0854	17.1659	0.0195	41.4985	41.0793	12.6157	7.2546	6.5174	0.8138	2.9936	19.3421	0	35.0848	11.0813	11.1837	1.2274	6.0973	3.4141	13.0858	7.7285	9.0301	17.3114	14.2928	9.1712	6.718	25.9137	29.4563	8.4121	46.0634	9.8416	10.8225	1.0133	83.1447	31.7102	17.4531	26.8068	48.8247	130.088	11.3983	2.3144	34.0753	8.865	0.4461	30.2868	1.6165	41.9895	33.346	3.3586
6323b2ba-dc70-408a-9533-3288d06dac00	0.3552	0.2892	0.1703	0	0.7987	2.7011	0.482	39.7728	0.074	0.9724	0.9326	5.2994	8.9618	2.4874	15.505	35.4058	5.0844	5.6156	2.1219	8.8031	1.1242	7.4198	6.3216	4.3858	0.7899	4.8004	19.9378	128.38	0.7003	16.3071	186.199	6.7184	0.0686	2.0584	7.5271	7.7291	12.1527	17.7154	22.5088	22.433	0.332	7.8491	2.7409	0.3776	52.7363	0.4736	23.2303	23.3866	1.137
3e5fc5c2-999d-4c9e-a6c8-2fc4fbaad7c1	0.5168	0.2366	1.7893	0.0441	0.6779	1.4978	12.7732	6.2546	0.6015	1.5908	1.609	4.1842	1.9993	5.7341	7.8777	20.3579	1.6831	2.1895	0.1209	11.2448	1.7632	9.0378	8.0634	6.7543	1.8082	3.4047	8.4205	49.335	0.2752	29.6974	5.4346	9.584	0.0918	0.9279	7.8245	1.5327	11.0596	8.228	36.4376	10.1874	1.185	6.302	2.4252	0.8424	22.2827	0.1174	28.3915	8.797	4.3403
09ee4223-5e0f-4f13-9634-4fa80b35948c	0	0.9134	4.779	0	0.1538	0.2285	21.333	31.6146	6.1914	0.5758	0.6504	2.8914	1.7688	2.1683	7.7181	32.4387	0	1.4579	0.0356	19.5609	0.4976	2.226	6.3413	8.5726	0.5423	2.4708	19.2769	75.6475	0.0592	25.5609	45.3238	37.8446	0.0271	0.0168	5.5536	2.2035	7.3113	18.2999	48.7289	4.9121	1.8085	6.321	2.5307	0	29.1501	0.1246	18.453	8.9202	0.2493
2f3c5a2b-9732-4989-8aa4-8683157b4f11	0.3643	1.2914	0.8472	0.0264	0.7166	0.1851	0.6892	16.6853	0.0855	1.1016	0.6464	4.7261	1.7917	0.7874	7.0679	8.2011	0.0765	0.9508	0.1083	4.4709	0.6947	4.3019	4.9067	6.7036	0.8789	2.1837	2.7848	42.1783	0.1333	19.8654	6.2312	13.0135	0.1372	0.5515	4.5382	1.0874	8.6724	4.8475	36.1491	9.9513	0.3717	2.3597	1.6904	0	8.7346	0.4208	18.3484	4.618	0.8082
99bb2eee-8460-4301-b5fc-ba12c668d08a	0.0134	0.1535	0.2738	0.0191	0.406	0.2457	2.7819	9.9397	0.0238	0.6098	1.9346	3.5015	0	0.51	6.0312	37.587	0.2611	2.8189	0.2614	10.3979	0.3846	4.5102	30.1811	13.1045	1.1532	2.7285	9.3998	102.693	0.362	48.908	1.2962	5.7196	0.0596	0.301	17.8291	0.116	15.1469	5.239	102.516	18.1086	0.7496	8.3248	3.4761	0.7651	41.4724	0.0914	26.0679	17.2805	4.3881
e4d205e3-b6d2-495d-b81b-d7b64c08d5e1	0.0893	0.0372	0	0	0.015	0.3274	0.5746	12.1535	0	0.2813	0.5635	0.6848	13.8246	0.04	8.531	11.6315	0.0527	1.1902	0.0696	14.3875	1.1036	8.7275	3.0116	4.4741	1.6954	0.8848	8.6897	22.6295	0.6301	13.9713	0.829	7.6205	0.1323	0.0491	1.2006	6.1823	5.7091	0.0988	17.4393	6.3399	0.4353	19.9526	1.711	0.2184	13.2466	0.1015	7.0273	5.5458	0.1462
d043230f-44b9-446f-9af3-da90894094d6	0.016	0.7605	0.5675	0.0085	2.1663	7.1454	1.2315	30.4095	0.0128	0.7335	2.3075	20.006	0	8.4435	8.2943	34.0103	1.8947	6.8104	0.1635	10.2913	1.6388	5.9105	16.9842	12.4224	2.2917	15.627	34.9087	233.208	0.345	32.707	173.539	20.7547	0.2484	19.1377	17.8975	1.5325	11.0407	73.8154	82.1285	25.0674	0.7213	7.9877	3.3762	0.5859	54.0049	0.0953	41.649	20.047	0.4901
b7af276a-b8f5-4a3c-8cbd-121186f11c36	0.5657	4.1857	3.593	0.0895	4.2073	10.1874	1.5774	10.7035	0	0.8795	4.285	13.0092	6.0792	11.6988	15.1025	29.5418	0.6082	11.8468	0.196	15.5551	5.4446	24.3609	2.9866	1.9386	7.8094	10.4406	19.6091	213.425	0.6877	37.1268	572.742	44.0416	0.1489	22.5081	17.216	3.806	10.2569	88.2386	16.9858	29.7378	1.6485	6.6082	2.1808	0.5635	62.7661	1.1137	36.7584	35.9534	1.6454
c0982e31-0ce2-422d-890b-538ae585b69e	0.0384	1.5399	2.213	0.2598	1.7132	6.9794	1.0665	23.8481	1.2277	0.4034	1.6379	6.3076	0	9.1152	7.257	22.7088	0.1701	3.6729	0.1124	12.0899	1.2861	9.9732	6.2015	6.5736	4.3029	5.9692	11.6138	76.898	0.7539	25.0879	82.2611	20.6963	0.2846	5.6959	12.8665	0.5225	15.7389	19.7634	49.9092	12.9295	1.4599	6.3492	4.0858	0.7049	29.7197	0.5894	24.1819	12.4822	1.8868
9934181c-8472-45de-ba46-f5ff1863af25	0.1123	0.1753	1.5135	0	0.3542	0.5087	2.6692	24.3544	0.3587	0.2947	0.2544	1.2361	0	2.45	13.4853	33.5969	0.9071	2.4378	0.6157	12.409	0.4336	19.0576	2.5019	5.306	1.1241	1.8705	66.6985	44.5609	0.1516	22.5204	1.0586	30.753	0	0.5788	1.9348	2.8369	15.8069	4.8126	11.9046	8.8745	0.6037	2.7723	2.3864	0.4291	30.1594	0.1196	4.3803	21.5704	0.7466
62eeead9-c93d-4dba-a2f4-586a13ad4ea7	1.0646	0.1329	0.1739	0.0303	1.1817	3.5291	2.0541	18.8786	0.1813	0.6704	3.0575	3.647	0	6.5733	20.1833	35.5733	0.1633	6.0686	6.7228	8.3691	3.4445	4.058	7.4172	8.6155	2.4308	3.4153	18.3516	94.2322	0.9808	24.5159	39.927	7.7781	0.0946	2.2432	16.5905	12.0775	20.8222	9.4171	54.5316	17.5244	1.4038	14.3029	2.6796	1.5618	23.9668	0.4353	27.5351	7.4265	2.787
8d38156f-5309-4b5d-a293-e1a0f1ada67b	0.3441	0.0244	0.5555	0.1168	0.9271	1.7975	1.1241	45.9447	0.5161	0.6155	1.9676	3.8212	0	0.8397	4.2738	35.0717	0.1523	5.1233	0.0457	31.6871	0.2242	8.6411	11.0713	13.5393	2.0868	2.1592	41.1006	138.681	0.3208	34.039	2.4488	14.3606	0.1042	0.9026	7.9019	0.029	13.2482	12.7094	51.9793	18.4399	0.4034	5.5382	3.3755	0.3824	28.3041	0.0533	23.7182	21.6663	1.4073
b0829ff3-92ce-40ec-bde8-9de00566cd5c	0.5716	0.3346	7.2863	0.0572	1.2618	1.0489	2.1288	24.5109	0.8367	0.1875	1.7979	4.4288	2.5915	6.6535	11.1074	25.319	1.6284	1.5654	0.3656	17.7785	0.1182	2.2315	7.3982	2.9047	2.4233	2.5095	11.9101	61.7918	0.5304	50.9229	61.4323	46.2506	0.0397	1.08	8.1367	3.1125	18.3578	7.6534	32.9645	12.677	1.9777	5.4611	2.7137	0.8735	39.3054	0.2739	14.787	13.0837	1.8997
0be9bcfa-aa98-45b8-9648-890cfa07c4e9	1.2667	3.4874	1.221	0	0.9115	1.2245	4.2581	14.6125	0.6367	0.3923	2.5248	4.5815	4.8203	0.9756	13.4883	11.4932	3.2861	2.0137	3.8125	9.1645	1.1086	10.2168	9.2606	4.5088	1.7734	3.4136	11.7009	26.6813	0.4663	38.2427	40.128	7.3274	0.2214	0.7476	13.6614	9.708	11.2956	3.2145	48.1463	18.1145	1.75	16.1254	2.4426	0.6093	23.717	2.2076	23.1939	15.8669	3.1258
5d94f92f-2991-4c5c-9bcc-8c2daee4c907	1.4304	1.6807	0.3937	0.0172	1.0745	0.4618	0.38	35.1724	0.2823	1.012	0.8897	1.848	2.3317	1.0786	7.4476	52.0873	4.6229	2.0797	5.8733	8.0719	2.9427	11.0425	18.8083	12.8467	2.502	4.4379	12.7626	51.3606	0.5032	30.7758	13.6086	12.1212	0.4284	0.8392	9.3101	11.0826	7.2016	5.0202	52.4002	18.5347	0.6392	13.4303	5.9106	0	38.7327	0.4655	22.3395	23.0745	3.1555
a3570e0a-7d74-46b3-8087-414c99e824c8	0.157	0.8203	0.0502	0	0.2669	2.2085	2.5693	10.8784	0.0073	0.3223	1.477	5.555	0	0.3435	11.7277	29.6694	0.2295	3.8738	0.7383	27.996	0.9862	15.3966	5.44	6.8157	1.3813	4.2929	18.3723	45.7218	0.6411	21.7899	5.6605	4.1201	0.2729	0.3376	14.4391	7.5912	14.5158	1.9433	45.7515	14.1783	1.7534	10.3029	5.785	0.8761	37.3674	0.2209	26.0156	7.3245	0.9213
3229e473-fae5-4ea0-86ba-88958beb8e06	0.105	0.0219	0.2401	0.0075	0.0971	0.1137	0.6489	24.7306	0	0.4041	0.8808	3.1823	0	0.047	3.3967	26.0733	0.031	1.8004	0.0205	7.8288	0.0541	8.4934	2.9501	5.2433	0.2335	2.9845	1.6096	99.7166	0.1247	10.7658	2.5173	8.8316	0.2177	0.0962	2.3493	0.0714	11.1748	7.6828	22.6497	11.4896	0.3687	2.3365	0.7108	0.2996	16.772	0	39.5518	2.3794	1.1168
6095f562-35b1-46e4-b3db-2ab498c16f16	0.2356	0.0981	1.1158	0	0.832	1.6874	4.2187	8.6203	0	0.3296	1.8653	3.2732	0	0.2108	11.5492	17.9526	1.668	1.5693	0.1837	6.8229	0.3811	15.6957	1.8153	2.518	2.7244	2.7644	23.3878	38.4616	0.3391	17.1162	4.0077	4.2556	0.5582	1.4891	7.5348	3.348	8.8231	3.1258	19.3909	15.3257	0.9116	6.8422	1.4646	0	21.5429	0.4281	17.2702	8.5608	1.2848
3f41f75a-ffc8-48f1-923d-87fd44c28aff	0.6522	0.3581	2.9439	0	1.3253	1.1316	0.9366	17.5065	0.5207	0.4119	1.1305	2.2349	0	4.6199	7.5097	22.732	1.7957	1.7408	0.1412	18.3769	1.119	3.1914	6.1651	7.9108	0.6715	2.935	24.9367	60.0131	0.3977	23.7952	14.2883	22.4343	0	1.477	7.1038	2.2051	12.6	5.4415	40.9455	8.6155	0.7529	4.5229	2.3252	0.6644	18.3201	0.0206	17.0478	22.1096	1.3832
38d6c8bf-a768-429d-96bc-b6c773a566ab	0.3969	0	0.7508	0	0.7731	0.6277	3.1932	11.5251	0.0107	0.3427	0.3742	1.2818	0	2.5288	15.0432	14.6799	16.7812	2.3701	0.0588	4.3305	0.7426	7.1934	1.6211	3.1068	0.6481	2.1174	8.7699	70.1796	0.1085	15.2969	20.0463	14.6117	0.0446	0.3452	2.8206	1.1548	5.8689	4.1941	12.3401	9.4337	0.5508	1.024	0.7708	0.3071	11.1985	0.1369	4.9659	5.2081	3.4935
a6b99059-69a8-4935-8f69-d0e9ee30ea5a	1.0883	0.7306	3.0532	0.025	0.5609	0.6287	2.28	11.0344	1.0465	0.4298	2.603	5.8449	0	1.021	8.2963	25.5173	0.8389	2.0893	1.3342	21.1689	1.1488	13.8595	4.2831	4.5563	1.6656	6.2359	9.7997	79.1624	0.4169	48.1672	36.1054	12.4897	0.104	1.0613	11.303	8.948	9.4177	17.9852	80.8459	26.6016	1.4088	7.5726	2.8163	0.6438	36.9802	0.4585	20.7118	7.6411	0.8137
a8e41ebe-7c5e-4fc9-a7a2-3c9c42066382	0.4874	0.3706	2.5104	0.04	1.3871	7.088	0.8983	19.3017	0.0998	1.0492	2.5156	8.4418	0	14.9703	16.6794	22.6782	0.3318	5.3015	0.1461	8.9906	0.9649	6.3344	6.9209	6.2108	2.8903	5.7712	23.427	120.696	0.6813	36.1248	1.7394	47.3865	0	6.0702	11.9108	2.7566	12.7034	26.3564	35.7047	17.4138	0.806	5.6033	2.7819	0.6875	25.9498	0.2342	19.4928	22.1478	1.9424
7b6cc47c-897b-453a-8170-945eeec8a6da	1.0721	0.56	0.8683	0.0093	1.7331	1.7822	5.7693	23.463	0.368	1.194	2.8716	5.3302	11.4269	1.0572	17.4405	18.8926	2.3391	2.8383	4.6821	10.5608	0.8688	19.0899	10.6841	8.218	7.9798	4.7554	40.9309	33.4932	0.7464	40.0364	22.332	98.6613	0.2138	1.8399	15.6107	10.0255	13.3642	3.6045	47.3703	19.894	1.4299	27.2236	3.4752	0.3745	28.1767	1.327	22.5988	31.305	4.582
7ddd6269-658e-4ef3-956b-9d095b4eec30	0.2583	0.1386	0.2867	0.0172	0.5701	1.3815	1.6184	62.6755	0.0043	1.3129	2.2422	2.9148	0	1.8689	4.5821	51.632	0.1643	3.8143	0.0944	25.176	0.6766	1.9003	23.5754	16.194	0.6821	3.3562	55.6867	79.9074	0.6187	26.5508	14.9326	5.82	0.1434	0.4936	12.6571	15.1114	17.8497	3.8599	81.3374	22.1072	1.0064	13.0887	5.5179	1.2334	47.9186	0.0688	19.97	35.0462	1.3206
b36e6ad1-4601-4e92-b9ea-9a729b6d873d	0.5376	0.7542	5.2239	0.0129	1.341	7.1089	1.634	21.5929	0.09	0.8875	1.5443	8.3131	1.7527	5.3107	15.136	35.0366	0.5239	3.4234	0.2472	18.258	0.7995	21.9411	7.6508	9.878	1.7733	8.1057	39.4954	128.491	0.763	28.6196	51.1467	54.3585	0.1342	2.6063	6.3662	0.5151	15.7284	37.6023	48.3775	15.2272	0.6103	8.9412	2.8438	0.8123	47.6423	0.0412	15.7847	20.0199	1.3836
40d5d05f-a2d2-4bb9-bc36-65af9664e388	0.2548	0.7025	5.628	0	1.4569	1.305	1.0201	22.4998	0	1.0249	1.5472	7.095	3.6963	2.8213	5.9536	19.8036	0.0752	1.5858	0.8193	20.3796	0.4403	6.2226	5.2965	6.4188	1.2654	3.5998	13.0522	61.5069	0.9169	10.798	26.0548	7.3126	0.1321	4.7147	12.7107	0.6612	17.948	14.6956	34.8894	12.9644	0.6938	8.2976	2.9572	0.6229	24.9768	0.4775	17.6542	21.2376	0.5211
936d2922-290b-4b12-b67d-42b4466939a4	0.34	0.9097	1.3429	0	0.2276	0.7975	0.9712	10.3995	0.1182	0.4005	0.866	2.6428	4.0265	1.0244	5.7343	24.0955	0.2211	1.5798	2.6775	8.5005	1.0867	4.2671	6.1817	5.6255	6.0797	3.3612	10.3077	61.947	0.3146	23.8597	4.5068	2.089	0.1849	0.3051	6.9231	2.4823	11.9102	5.4853	49.4888	21.6454	0.4773	15.644	2.2438	1.0179	35.3923	1.4894	23.0604	19.968	1.4758
339ffa9f-b161-4793-83dc-f1a1485600f9	0.0183	0	0.9837	0	1.8725	1.4746	1.2832	12.7365	0	1.5164	0.9981	10.253	0.8827	3.8177	8	29.5267	0.0054	1.729	0	12.2364	0.0268	10.158	3.6918	9.7959	1.1501	7.5058	38.9782	99.2168	0.1281	32.7497	3.1756	7.0979	0.2703	3.6367	9.1446	2.2725	18.4593	16.4139	26.5234	16.3713	1.6611	10.3231	1.9629	1.2272	66.6464	0.5597	27.9068	17.7904	3.5586
05d307d9-476b-4e15-bb31-ac207b2ba41f	0.3214	0.9851	2.7489	0.0749	3.5826	5.1108	1.824	11.638	0.9519	0.828	1.7411	4.6619	5.0871	13.649	16.5419	18.0812	2.5655	5.5617	1.4693	10.5583	1.3279	9.2099	3.4336	2.1148	3.8731	4.6052	15.7516	70.9168	0.2839	25.638	171.566	15.7826	0.4414	5.0833	8.4112	4.864	7.9733	23.4885	16.1038	9.591	1.0177	7.5487	1.635	0.3572	26.331	0.5576	25.8496	13.6427	2.0558
ca667d02-0c68-4ece-8ede-a81413a629a5	1.3614	2.1542	1.5831	0.0603	0.6252	2.5081	2.4091	6.048	0.4442	0.6255	1.907	3.8548	6.3712	1.1579	9.3054	12.4574	7.6568	2.343	1.3205	6.28	2.2213	26.39	2.1602	2.2272	2.7626	4.113	5.936	61.3856	0.7654	40.5013	10.6605	70.7548	0.209	1.7759	11.0306	6.6926	6.2097	11.8444	23.1824	14.6555	1.4094	10.0055	1.0097	1.649	26.2196	2.127	21.5873	5.3126	4.4137
82b4d7fc-0753-4201-927a-4a8e8ad974bc	0.3387	0.109	1.5571	0	0.6431	1.6143	8.4028	5.7749	0.0112	0.5314	1.5958	5.5339	1.0133	1.9219	7.9439	14.3556	0.5378	1.3729	2.0419	4.8323	2.1725	16.9133	3.8009	2.1436	2.1436	3.564	36.5451	33.0199	0.2602	20.3842	12.0304	39.6487	0.0931	0.8302	14.6688	2.1362	7.8631	8.0316	14.1027	10.688	1.3439	18.1145	1.4393	0	19.6599	0.2618	22.9114	15.1491	9.1991
ef23aadc-bbe0-4070-b3b1-4e5d84b0e0ea	0.8255	0.4451	7.7222	0	1.136	0.5438	2.4986	31.5807	1.0307	0.7088	1.2539	2.8855	0	2.1154	13.1381	14.1998	0.3188	1.5735	0.1316	10.4193	0.5629	7.969	6.3973	7.1506	2.1698	3.2479	9.7026	77.0598	0.2998	31.0526	9.6626	45.6423	0.1334	1.2788	13.2147	0.4591	17.333	8.5056	49.1507	13.8701	0.9358	7.1318	2.0432	0.1835	21.3036	0.1534	28.745	6.9276	0.5526
8e0dceff-a192-4a03-967d-1aff965ca4d2	0.6104	0.8442	2.4798	0	0.3119	0.3475	0.7893	11.2549	0.6087	0.6487	1.8043	0.7219	0	1.1408	7.9669	12.7016	0.1915	1.3289	0.0452	14.7411	0.5625	5.6429	2.9397	2.5483	0.4124	2.1086	8.4178	49.5539	0.0667	22.8835	2.9575	53.7374	0.0687	0.4884	6.5068	1.7331	9.3705	3.161	9.8775	4.9123	1.5947	2.7756	2.1385	0.2834	12.4754	0.0527	19.2364	12.071	0.7585
5762e95b-ab5c-48bc-8708-c374210bb99a	0.2626	0.1934	0.1012	0	0.7889	0.5234	1.1719	10.9405	0.468	0.4025	0.873	5.152	0	1.5444	8.1442	16.7266	0.1149	2.2181	0.1725	8.7749	1.6531	5.6557	5.2285	3.0271	0.6692	1.3291	3.3706	45.1956	0.3058	14.205	42.4322	7.3012	0.1704	0.4419	6.2036	3.4398	6.669	6.3283	45.1023	17.862	2.3784	7.1855	1.1715	0.2525	24.0977	0.0503	30.0901	5.2455	0.7482
6482ddb4-3def-4d4a-b887-e59cc628f5ff	0.37	1.1106	0.4532	0.2734	1.4541	2.4358	0.9422	10.6653	1.0681	0.3734	1.7905	7.4149	20.6467	1.9102	5.7399	25.6873	0.2897	3.2286	6.5737	3.4184	2.2761	19.5217	2.9471	1.8905	2.9435	4.4123	5.4995	71.1098	0.4686	22.5855	46.8801	16.1318	0.3161	2.8258	2.8872	7.004	5.2983	12.2344	17.8041	27.2484	0.719	18.3461	2.4189	1.9138	31.8232	0.1697	16.6163	6.2566	1.3389
e4486f5c-8843-467f-bd99-ff0aa8126d6e	0.8861	0.0195	4.3722	0	0.7556	0.3742	1.6407	27.3999	0	0.6549	1.2059	4.8208	3.6212	1.2564	8.9961	10.8148	4.0095	1.523	0.0365	8.778	0.7433	4.4672	8.9253	17.7505	0.6106	1.7533	22.7784	52.4914	1.4822	14.504	8.1788	17.1902	0.0832	0.4202	2.5319	5.1242	16.7488	7.1066	43.1306	8.7186	0.5366	6.3432	3.6511	0.3051	25.9753	1.2119	30.2996	15.8628	1.1741
7c1b20f4-2314-4523-9471-6a9f8c7aee0d	0.7013	2.1283	1.2766	0.0104	0.86	2.7866	2.5887	16.0383	5.4907	0.8689	0.6666	4.5324	7.0655	3.8568	19.6873	33.8254	0.3534	2.7043	3.0469	20.1943	2.2669	4.1183	12.8292	7.451	1.3864	4.6241	16.8645	45.6201	0.5258	22.3246	27.5664	21.3632	0.3029	2.2352	16.5167	5.0554	16.5676	8.9119	67.1527	12.9609	5.2244	45.4237	2.2489	0.4168	56.2483	1.0952	46.9038	15.5879	0.8367
a3c64be0-748b-4709-8591-44b82b0db328	0.4003	1.8653	3.9939	0.3344	2.854	4.7258	1.273	8.4915	0.2656	0.4566	1.565	3.9192	8.4169	5.49	8.9691	14.8171	1.6431	2.1667	0.0339	6.7344	0.7807	6.8572	2.347	2.3386	3.6901	5.5086	16.5401	66.0053	0.5136	34.1678	22.6778	45.9732	0.1804	4.3927	7.6098	2.7423	11.3815	16.9992	20.348	11.3655	1.0227	9.2379	1.6406	0.2128	25.3384	0.4151	23.5114	8.7435	0.4746
6fcf4f4a-cb4c-4908-9134-f53a61d9642c	0.0204	0.8269	5.5913	0.0073	0.1114	2.4355	1.317	16.5857	0.0108	1.4792	1.0323	2.9899	11.8254	0.2051	8.5506	31.1462	0.3547	2.2531	0.1986	22.6389	0.9515	31.2815	10.3697	9.5054	1.0423	4.338	31.2942	48.0009	0.2933	40.6309	4.1757	4.5195	0.1056	0.0887	8.7622	0.2644	14.34	2.685	90.7217	14.5872	0.4089	9.3015	3.06	0.7474	48.9151	0.162	19.0507	14.2975	0.389
93bbec66-e574-4c6a-96cc-24c4c1cb41a7	0.6293	0.3405	5.8788	0	1.0583	2.1594	1.603	63.3512	0	0.7044	1.4863	4.251	0	0.732	23.9818	28.7542	3.0149	2.9411	0.1472	19.0736	0.5183	10.3604	7.9198	18.2559	1.2315	4.0781	154.519	87.7178	0.1721	29.421	9.0508	26.3977	0.2609	0.8186	13.3392	0.1555	11.5595	5.7982	69.5991	21.6471	1.1364	7.8022	3.1551	0	35.6856	0.2001	21.5625	45.1898	0.8923
2ccbddda-da01-447c-b399-98770105048d	0.6871	3.5838	0.9802	0.0309	1.2068	0.6592	2.1059	28.4184	0.2284	0.4564	1.1964	4.9171	1.6824	1.5177	11.6203	22.8759	0.9391	1.7523	4.3057	12.1417	3.0699	4.6246	14.1436	6.069	1.2637	5.3697	17.4486	43.1721	0.6072	21.171	27.7428	10.998	0.1546	0.7928	12.4662	8.0289	9.1776	9.2962	40.2612	18.1317	0.8601	19.1671	3.1746	0.4962	28.2652	0.3161	32.5069	16.2967	1.3519
ccdb4cdf-6e04-4251-9882-9f85cd7495dd	1.336	2.3062	1.8569	0.0572	2.8875	7.518	1.7161	20.4181	1.1696	1.6873	3.3289	14.7592	1.1107	13.4876	29.5948	20.5782	1.6533	8.3896	10.9897	9.8284	2.1702	12.1757	10.3975	9.0304	1.6005	5.7054	3.182	116.277	0.5827	34.4	34.7661	3.2501	0.5272	7.4326	24.2457	7.628	11.2646	29.5223	36.2876	9.2537	0.4938	8.4164	1.0249	0.3744	25.9258	0.5739	51.0563	7.8867	4.6973
10d214b0-f69c-4d30-a1ea-24ee5ba64cab	0.1418	0.5178	0.4981	0.0628	0.5805	1.3237	0.6326	13.9694	0.2934	0.7721	0.5009	4.3646	1.5526	1.8494	2.2182	12.6059	0.1231	0.5347	0.1564	2.9211	2.2192	1.9282	10.6686	5.2699	3.8795	2.5404	6.5772	40.1054	0.4015	18.4172	43.6633	6.6938	0.3328	2.7831	3.1748	1.6416	7.05	11.6703	52.1919	5.1029	0.4429	6.7617	1.1107	1.0794	16.3234	0.2279	15.7183	3.5026	3.4144
1075a6d9-44df-4720-ba41-8050ae748344	0.4778	0.562	2.307	0.0148	0.6114	4.3945	2.541	17.638	0.0516	0.8357	1.7841	5.3244	2.0091	4.7864	9.5253	42.4989	1.4585	2.8128	0.3239	20.2765	0.4277	26.5149	7.803	7.1364	1.9403	7.8267	39.1869	105.086	0.7326	32.8703	8.192	21.2219	0.0923	1.3606	10.4074	7.4059	13.0898	16.5369	39.2041	15.7145	0.8485	12.2778	3.3848	0.8465	46.5983	0.2595	17.5378	24.6111	1.2462
ecc7f525-2fd2-4a5d-b7ba-953e1e26d00a	0.5713	0.3438	3.0858	0.1029	2.1358	2.9925	1.302	12.8351	0.6448	0.5418	2.3416	8.2112	0	8.1763	11.7586	21.2206	0.2924	4.6676	0.2012	8.7332	2.2472	3.3732	5.0385	4.2564	4.0718	6.5798	10.2498	130.312	0.6465	23.0971	322.858	51.2888	0.214	7.1882	10.3807	3.7256	10.8331	35.0843	29.1795	13.9928	0.9174	4.5067	2.5986	0.589	19.3743	0.516	24.7472	11.7467	1.2388
75419d04-27e7-4e2f-bc88-22262707ffc0	0.6065	0.9015	1.698	0	2.1614	1.347	1.5023	9.8223	0.0051	0.6567	1.2596	9.893	0	1.9059	7.9622	46.0485	1.0735	6.7331	8.8088	33.5559	0.4035	10.7074	17.2692	9.8114	3.8322	3.8007	22.3457	138.858	0.3742	35.5486	7.3136	1.0579	0.0642	7.1763	29.9949	15.4087	13.2411	25.2528	39.0747	30.4229	0.5588	8.0811	3.3231	1.118	53.5288	0.2132	27.2668	13.5085	0.5513
a3990f5c-0761-42cf-8ddc-a81d23dc0f86	0.2151	0.4131	5.6741	0.053	1.5233	0.372	0.7823	9.1384	1.1272	0.434	1.0823	2.7048	0	1.8875	4.9797	11.7604	0.1171	1.5175	0.4353	7.8524	1.9707	7.4717	2.7088	4.0542	1.3981	3.1122	2.3553	27.4329	0.5894	14.5152	3.5499	39.9705	0	0.5683	4.665	0.8126	7.081	3.1554	28.5052	7.9494	1.7605	5.9428	1.8041	0.3034	13.9069	0.0846	14.8701	9.3127	0.5413
380f27a3-723d-4d2a-8515-d95c5bfd4381	0.1283	0.0191	1.4518	0	0.8631	2.9462	0.8552	11.0056	0.0195	0.5129	0.9962	5.3785	3.5454	6.0683	37.3604	43.5506	0.173	3.5426	0.2143	13.2986	3.8006	3.9628	0.8532	2.1549	2.337	3.1076	28.2875	80.1749	0.653	20.125	148.53	27.8665	0.1357	2.4598	4.038	3.4428	9.3704	14.9626	9.7325	12.8718	1.4973	10.2417	1.5806	0.3734	28.4868	0.3123	11.7755	25.5409	0.2999
a9df4e32-bac0-4fd8-a742-9d3bcc8d8837	0.4152	0.5832	0.8476	0.1477	1.0648	2.8355	2.1205	28.6308	0.6556	0.6173	0.975	10.9402	0	6.2693	4.7595	17.7929	0.3919	3.4683	0.6473	10.068	0.6869	7.1147	10.6304	10.0161	3.0162	5.8997	13.89	51.5966	0.2689	18.1499	51.9288	11.8331	0.123	5.3438	7.7342	5.477	11.8162	22.226	53.5432	10.6911	1.1752	7.9859	4.3402	0.423	15.9839	0.0943	27.9993	12.1572	1.3586
72c06eb9-7cfc-444a-a0af-f300ddcf2704	0.6265	2.0907	2.0325	0	1.21	1.0797	4.6917	59.8389	0.1104	0.8843	1.5483	5.8225	2.5075	10.0918	7.4617	34.9697	0.1071	2.4418	0.0758	10.3393	0.7435	15.8199	25.6581	29.6699	0.7688	3.1189	29.2155	61.213	0.5925	26.6185	5.6134	5.3598	0.096	0.5522	11.1259	0.2803	13.6786	4.6105	115.858	18.3673	2.3688	8.2674	5.635	0.0528	29.8615	0.1914	31.1515	13.9495	1.3079
2ddbf110-a158-47bc-8da9-6705c563ce1d	0.3572	0	1.2517	0	1.1889	0.8057	1.3231	35.9889	0.0264	0.911	1.0785	5.2049	0	0.3329	4.8528	58.8313	0.0176	4.1359	0.058	47.08	0.4049	2.5979	12.4466	17.7466	1.3239	10.1731	41.243	159.233	0.1178	31.7499	4.7181	8.8415	0.0882	0.8316	13.4691	0.6805	15.2168	16.4821	58.634	16.5389	1.0664	9.9209	3.2233	1.88	59.6092	0.0507	23.4741	20.1186	1.6232
3ab924b6-15cf-4a1a-876e-1d3bc9b60c5a	0.7917	0.5841	0.2116	0	0.3995	0.5395	1.6201	7.5968	0.046	1.2085	1.5937	4.293	0	0.4347	16.7138	20.5126	2.8919	2.4875	2.062	5.8067	0.8415	7.9189	4.1247	2.7364	4.8659	2.8009	24.1212	24.8179	0.2253	26.9876	116.039	64.0963	0.0959	0.9989	8.4119	6.137	9.4664	2.2282	24.4879	10.5348	0.6653	13.6972	1.9378	0.4399	18.6134	1.2017	12.7162	24.8928	3.5327
bf8d55a9-9128-4a7e-baff-4826b73d861b	0.1028	0.3008	0.9757	0.0274	0.1458	0.4655	0.2187	28.6576	0.0068	0.2696	0.2586	2.3774	0	1.164	8.5229	31.4824	0.8641	3.4617	0.1502	3.7208	0.3684	13.6724	1.7324	2.9424	1.9429	3.7342	34.309	103.414	0.0694	17.0861	96.487	33.8829	0.0571	0.8297	0.5737	0.3691	10.9978	6.4277	7.6221	8.5476	0.3452	1.4565	1.0338	1.0209	20.1309	0.4815	2.1825	20.4247	2.1545
db9cb4ae-07f5-4599-9e0b-b2289cc487d9	0.0613	0.4924	2.6837	0.0374	0.2211	1.27	1.0444	18.1302	0.0187	1.0117	2.0993	7.5576	0	0.2941	11.4772	53.1781	0.4809	2.67	1.5885	5.9222	0.812	1.4316	11.7328	8.4702	1.0135	4.019	23.574	168.322	0.2555	44.4351	1.5247	7.4932	0.1557	1.3969	5.2107	2.8591	15.1995	11.7731	65.1687	22.3508	0.5652	9.9801	4.4949	0.6428	39.1093	4.6881	29.1264	14.1457	0.3585
acec0bfa-be97-4684-a1ce-7aeacc1dbacb	0.6578	0.1825	1.5578	0	1.051	0.7122	1.7559	39.2934	0.0233	1.5724	1.7214	3.3091	0	2.6979	12.5055	42.9348	0.3752	2.6698	0.2991	13.3224	1.1448	5.1973	14.3612	11.0818	1.2679	3.5525	56.9924	80.6656	0.6786	46.2624	6.6126	22.7752	0.0974	0.7432	7.0503	6.8419	16.3263	3.677	41.3985	16.8578	1.9484	7.3925	6.0685	0.7148	35.6114	0.1743	22.0342	28.3619	4.5442
9ccf0977-1b71-40b5-b22d-4a839d055ff4	1.186	1.504	3.6016	0.0527	2.9919	5.973	1.8461	23.602	0.8023	1.4585	2.3252	9.2334	7.1692	11.8147	12.8521	18.6134	0.656	5.7672	0.2167	11.2307	3.1749	8.4286	8.716	12.0818	3.0222	6.6729	8.7614	100.597	1.0404	28.6196	50.6543	26.445	0.1647	6.383	10.372	1.832	8.7028	34.4564	65.1147	13.4707	0.9959	8.0888	3.0196	1.0572	26.5658	0.2315	31.7485	8.5877	2.1729
a55a5114-d042-45e7-b467-ca4776961287	0.3004	1.2985	2.93	0	2.3175	2.6563	1.1803	16.0996	0.0308	0.5154	1.5585	6.5395	1.6764	10.5855	11.8076	20.341	0.317	4.9211	0.1351	12.6161	1.9883	7.3562	2.4485	2.5671	4.5229	4.8794	7.8373	103.166	0.9606	20.0813	312.488	21.0997	0.0513	6.7324	6.5315	1.2959	10.1752	26.8944	19.9607	11.233	0.4347	3.2088	1.6077	0.2119	18.7393	0.0394	17.8103	11.7909	1.796
f66fabc1-1e97-4c21-a63f-5313d362775e	0.4659	0.2951	3.1428	0	0.6984	0.5399	13.9215	14.3485	0.2156	0.2834	1.1145	2.4989	0	2.7641	5.8832	15.8768	1.3027	1.1281	0.3948	6.3165	0.6554	4.1848	1.9185	1.5464	1.2914	2.6494	5.0272	71.4778	0.1968	15.5689	36.4949	35.6959	0.18	0.6309	3.7389	1.5895	7.0142	15.3789	16.6724	10.3321	0.7838	3.5435	1.4015	0.1651	15.4357	0.069	10.5528	5.63	1.3256
2db163c6-36c5-4fc5-b677-357d38b531cc	0.5755	7.6035	14.7901	0.0464	3.3145	3.5179	6.2713	11.741	1.9767	0.4938	2.5865	7.335	1.0502	8.8903	13.4748	32.932	0.1281	2.1402	0.4867	24.6168	2.7865	27.7541	6.1529	5.8027	2.3987	7.9719	17.5838	124.168	0.6448	35.4889	26.0702	17.7836	0.3537	4.6104	14.5562	5.4276	10.9895	30.9145	65.5032	27.4519	3.0735	15.0855	2.7601	0.3982	59.2303	0.2343	27.6583	12.5886	1.1251
ce7375f7-b7ef-48cf-897a-59d5df6253da	0.3563	0.0908	2.9925	0.031	0.8804	1.744	3.3284	38.4232	0.2013	0.0763	1.6832	3.945	0	2.4398	13.0257	23.7458	7.323	3.2751	0.2126	12.7515	1.0105	5.799	7.4232	5.895	1.4553	3.2757	24.5219	92.3811	0.4788	26.8381	24.9628	48.5524	0.2261	2.0182	8.5535	4.232	10.3087	15.3147	40.5945	14.5123	0.7346	8.1133	2.4825	0.2667	29.8848	0.2477	18.1013	13.352	1.1896
de0ac7a9-1056-4422-b428-c79181273c66	0.6396	1.6639	1.1238	0.0138	0.8557	0.3955	1.4177	16.0035	0.0138	1.1696	2.5817	3.5172	0.9374	0.4987	11.1528	44.6921	0.1029	1.8838	3.0222	9.7496	3.0216	18.7033	11.7616	4.8981	4.2963	7.0058	3.8508	108.877	0.4046	25.9872	26.754	11.6713	0.5884	1.3362	7.8399	7.4734	14.9508	15.0021	32.473	8.072	0.4445	9.2344	3.7415	2.962	36.5881	0.2752	42.8075	13.7569	6.8183
88233941-a963-4b16-b03f-9f109aa12b61	0.7322	3.4568	4.8191	0.0156	1.7185	4.5055	0.758	12.4322	0.0155	0.4779	2.9478	3.7436	4.2279	1.2468	7.0792	35.9766	0.1161	2.5598	0.9372	7.8707	0.9482	8.6287	7.8243	2.2527	3.4512	4.1764	28.476	131.613	0.7001	29.7972	15.8448	6.2843	0.0486	7.043	12.7168	3.7206	10.6545	30.9132	36.2591	32.8538	0.6578	9.0208	1.7479	0.3117	41.2576	2.1845	53.3116	9.0475	1.0728
a3e5735d-a095-404b-902f-39c8589ac67e	0.0063	1.0859	6.074	0	3.2231	11.1257	0.9571	18.982	0.0269	0.8795	2.731	13.0566	1.8352	12.0975	16.433	20.1193	0.3247	6.3818	0.0555	22.3521	1.6743	22.6548	5.4066	4.4472	2.335	7.8233	12.1983	160.794	0.7238	29.8109	247.779	51.1473	0.0843	19.4421	13.4044	2.8724	9.179	52.1524	27.8635	20.9235	0.6935	6.091	1.6744	1.7397	30.922	0.3017	35.9859	21.3624	3.8547
7cca1b38-779e-4cef-b0ab-4bc45994f4df	2.1283	0.542	12.8981	0	2.2749	2.1832	1.4621	5.7935	0.1908	0.529	1.8152	5.0917	0	0.639	6.8471	21.9016	0.0198	1.6605	0.2947	8.5869	1.5321	11.087	4.8821	4.9515	1.2954	3.6177	10.8069	56.2787	0.9312	19.3291	1.0394	14.4174	0.0498	0.9159	5.9458	4.6408	8.8151	8.1745	28.615	14.4087	1.1077	14.3262	1.3479	0.6162	36.2521	0.1908	17.2309	8.0593	2.1535
5651e947-75df-4f0e-a2fb-1722d5751fc9	0.5074	1.0481	0.1462	0	0.6777	0.839	1.8914	25.0979	0.0238	0.7831	1.6823	1.9841	0	1.6525	5.1718	37.2687	0.4755	3.0311	1.0907	5.3511	2.683	11.6515	12.3615	10.9374	1.062	2.3616	19.4253	65.3076	0.6606	13.7829	10.2127	8.2446	0.1326	0.5332	7.7498	6.0305	15.5364	2.8464	89.9082	16.7688	1.8287	41.3657	3.5466	1.1859	32.9795	0.1017	22.9557	17.4188	0.3662
2350d875-e719-4d8e-94ca-ec1c29fac3ca	0.8742	0.4623	1.4512	0	3.2418	1.2533	1.3284	21.9508	0.2034	0.5013	1.0578	4.2742	6.9305	1.1221	8.634	15.456	0.2706	4.0611	0.0559	5.9953	1.2435	2.2264	16.1962	8.4903	2.1461	7.4286	175.808	40.1324	0.753	29.4575	1.4961	11.995	0.3396	1.4704	9.1795	6.2783	18.1256	9.666	79.535	9.9941	1.027	12.9616	4.7064	1.2264	24.2766	0.472	36.8301	26.225	4.4551
a4bf94ae-15f5-46ff-8eff-8d26a4d04150	1.2665	0.0213	3.82	0.0727	2.319	9.8848	0.7857	13.7032	0.5582	1.1433	2.4946	6.0432	3.9514	4.3869	10.6164	33.0155	0.1928	2.5429	0.3981	19.4227	2.0728	51.8205	4.7875	4.8656	3.6949	8.4772	20.2671	135.117	1.1101	37.5222	56.0742	16.0719	0.0907	4.4069	9.5045	2.7515	7.7111	23.6023	29.9518	15.8054	1.5663	15.3349	2.6731	1.5816	39.6291	0.2784	21.6207	16.9666	2.9522
50fc515b-a665-4dc0-b1cb-15cc018f12b4	0.351	0.2971	0.685	0	0.6453	0.8175	1.4066	15.6975	0.1457	0.3434	0.8981	2.8643	0	1.038	7.8065	13.7811	0.4212	1.9586	1.0087	5.0455	0.2493	11.4613	6.0162	6.5671	1.5347	2.5072	13.9085	34.0356	0.3468	24.3756	16.767	16.9787	0.0264	0.4659	6.4062	3.0214	9.8666	2.7297	29.5086	9.235	1.3044	9.6995	1.7627	0.1454	21.3061	0.4459	16.1697	14.1379	1.6059
a6cd4b64-d26c-47ae-8e30-f07be795ba2e	0.4768	0.2084	0.3037	0	0.7939	2.645	1.2447	27.581	0.1523	1.201	2.5724	3.2212	2.7671	2.2401	8.0704	15.5314	2.4815	5.5142	0.1115	22.3369	1.6409	10.9969	12.63	5.81	3.0541	5.2205	29.2123	71.2151	0.1956	40.3397	5.5308	8.3552	0.7626	1.0746	6.6438	10.8188	11.7355	5.8522	49.4316	14.8754	0.9431	9.9129	4.834	0	33.2479	0.0975	18.3811	13.537	4.0568
d5751803-11a6-484f-af04-4e234db3c5de	0.0228	0.0355	1.7155	0	0.4883	0.441	1.0661	31.5674	0.0424	0.4182	1.146	1.9638	0	1.9868	9.1619	10.8954	0.8263	1.7624	0.0999	5.6922	0.7158	2.5165	10.528	9.1532	0.6837	2.0224	10.1389	78.2731	0.1475	15.0551	5.5468	6.9588	0.0759	0.618	6.4794	0.0844	14.0874	9.0958	134.381	9.2588	0.4651	5.4244	2.3891	0.0696	14.8857	0	22.6138	4.4515	0.3726
7e6a0574-9d6d-42b6-9275-2fecc7587c0f	0.2567	0.6486	2.4255	0	1.0484	0.794	0.7399	7.3107	0.026	0.1924	1.2548	4.5676	7.093	1.9687	5.5509	21.1832	0.0865	1.3414	0	9.6926	0.6741	4.3457	2.7077	2.9674	2.229	4.3421	9.4032	63.3543	0.3431	11.8906	7.9392	19.1354	0	1.0413	4.8969	1.7672	7.1389	9.8655	20.5127	9.8488	0.9722	4.6086	1.2134	0.2988	18.9194	0.0833	10.571	7.4158	0.5999
74c5f3e2-ba66-4d3e-8a44-6e97ede2ef22	0.5525	2.4997	3.2849	0.2915	0.9083	3.0091	3.0765	8.8674	0.8261	0.8143	1.8744	2.8551	5.4036	4.9577	10.695	17.7597	9.3618	4.0062	0.1452	6.8632	2.0678	20.1919	2.6607	2.8151	4.4454	4.1098	5.3027	74.1011	0.5295	32.1443	9.2883	27.436	0.1379	1.9278	5.2593	4.0965	6.2274	10.8103	17.6346	18.5855	0.9075	7.5754	1.0177	0.683	23.002	0.1904	12.1565	6.7774	4.1134
c49be39e-dc30-440f-88c1-1aa5b05bc505	0.0252	0.8348	0.8406	0.0862	1.082	2.1433	0.315	7.8824	0	0.7149	0.9954	3.8438	0	1.5577	16.2009	9.9975	0.9557	3.0333	0.177	4.6857	0.846	7.0064	1.458	2.5656	2.2668	3.2999	2.0614	66.4943	0.6483	12.2564	30.7266	58.9432	0.0672	3.1271	4.9317	0.8886	4.0045	11.7441	7.3215	8.8405	0.6183	2.6482	1.2599	0.3084	12.0882	0.7737	13.7466	9.3235	2.9308
869c06bb-c3f3-454e-b43d-3bea53585540	0.4495	2.0216	5.9171	0	1.3263	2.4559	2.5078	26.7	0.0162	0.7196	1.0276	2.7104	4.4215	0.8181	6.9708	54.1469	0.0944	3.7441	0.1336	37.268	0.1345	7.4314	6.8983	6.6661	0.7456	1.0458	81.3762	94.1305	1.3409	52.3546	20.5914	2.6609	0.0677	1.1726	9.605	14.9285	12.6711	14.9113	53.2456	15.3204	1.7199	6.6969	3.5985	0.3726	44.5622	0.4413	16.9918	22.261	0.2493
6718463d-6f44-47c7-a622-c149f344ffbd	0.3187	0.1827	3.5373	0.0139	0.9024	1.0076	2.4729	14.4163	0.1108	0.6143	1.4794	3.9963	1.8871	5.0196	16.34	31.55	3.6725	2.1626	0.1141	10.4945	0.5595	13.6557	4.1971	5.1838	1.2729	6.3014	30.9993	110.849	0.3862	23.1662	4.4509	15.2537	0.1734	0.9295	6.5226	5.606	10.7003	9.9958	19.6841	16.3471	0.9927	6.4953	1.9174	0.4771	40.3621	0.3989	11.8125	12.9671	1.7558
f4580f79-776a-4263-96f8-8125df218087	0.4638	2.8956	0.8697	0.0489	0.8812	2.3321	1.6789	6.4871	0.3414	1.1718	2.2477	4.6706	0	1.5371	6.8036	30.4448	0.1926	3.0014	2.2432	16.86	2.0968	6.1626	3.2539	2.1508	1.4772	4.8358	21.1348	41.7532	0.3709	28.2577	34.7357	9.4299	0.5342	1.8569	4.9681	13.8408	5.8974	5.9197	28.0908	9.2279	1.7111	8.3735	2.8766	0.98	26.1535	0.2341	17.3329	24.2445	3.3727
775b0ee7-6bf8-4ee1-9061-0efd7393d49a	0.6966	1.5513	0.3642	0.0453	1.3287	0.2972	1.3257	22.1479	3.3011	0.8915	1.4279	2.4878	3.6974	5.4448	6.3759	25.488	0.3459	1.2524	5.7122	8.5819	2.5487	11.7143	15.751	8.9112	1.7193	4.8081	10.8476	56.861	0.3256	24.4531	21.0866	10.6909	0.4906	0.5662	7.5225	7.1256	13.9196	15.428	62.3559	9.0119	2.8216	30.4408	2.7089	0.6231	41.1281	0.4342	30.8059	12.858	1.1814
e5c4a8d4-f43f-4dc6-913d-3b2005326fc2	0.5084	0.052	3.1239	0.1957	2.481	8.1839	2.7431	12.4915	0.142	0.9184	1.6777	13.5959	2.4182	9.956	19.8821	38.7777	8.3498	8.6686	0.1949	12.4518	5.4604	11.6525	1.485	1.8325	4.5966	10.228	10.7894	233.11	0.5309	39.1277	566.477	68.0238	0.037	7.7303	8.7411	3.9858	8.1749	78.7883	11.5647	23.5969	1.1288	4.6712	1.2786	0.7132	47.4341	0.2272	13.3863	16.4	1.2272
78f27be3-fbd5-4847-b2a3-b9700c512353	2.0142	1.2474	0.5969	0.0277	0.4016	3.7746	0.8788	17.077	0.0588	1.3638	1.6153	8.3233	1.8853	1.7443	3.7357	21.864	0.299	1.655	6.6864	23.6344	1.0392	14.7194	14.8477	6.6818	2.8033	12.3597	24.4708	109.599	0.947	13.8022	2.9769	2.7778	0.9237	3.3035	9.2355	17.3316	16.9763	11.8001	34.9851	7.8774	0.5308	10.2053	5.6489	3.4951	24.4474	0.7859	44.3741	15.6634	1.8604
404902c7-47fd-4860-b7e2-e682d8a1880a	1.0952	0.0378	5.5886	0	1.8623	3.2657	1.1503	32.0189	0.0709	0.7303	1.888	5.3051	0.8778	6.538	12.6096	24.8403	25.5232	2.7405	0.0884	31.9888	1.1613	22.8508	17.2509	17.2676	2.476	3.4491	33.538	83.4924	0.5128	37.3678	29.2666	19.7111	0.2419	1.6463	12.8855	0.3701	18.6015	15.3878	58.5754	12.6812	1.3724	6.8599	4.9784	0.7027	39.3087	1.2267	27.4369	23.0186	0.5197
7bbee063-8892-4e22-add3-77bfabbfd0ad	0.0086	0.1967	0.0982	0	0.3612	0.3148	1.6847	58.3992	0	0.1953	0.7494	3.9309	0	0.0577	5.1569	13.3184	0.0152	1.7684	0.0335	4.2325	0.1958	8.9573	38.6713	30.8008	0.7388	3.5284	20.6642	81.5153	0.4267	32.0913	0.299	2.1641	0.0127	0.3542	9.1203	10.6275	17.5181	5.8895	141.892	14.5864	0.8989	13.5266	1.8307	3.3609	29.8566	0.4293	61.0525	6.6248	0.2577
c7351fb2-1872-44b7-9189-412fb0b5cf6a	0.0214	0.0556	0.1834	0.038	0.8723	0.2494	1.0452	20.6195	0.0152	0.2619	0.6745	2.7156	0	1.7465	6.2781	47.5239	0.0568	3.1298	0.3126	5.0064	1.8401	2.1238	3.3133	8.7687	0.1744	5.2901	1.2483	176.711	0.1693	10.8977	14.3478	6.9869	0	0.485	3.6479	0.2775	6.3894	7.4692	24.1096	9.7242	0.8047	2.1433	0.6059	0.1743	19.491	0	32.3503	3.4467	1.254
fd7f8b01-5209-47a2-b7ea-054929f851e8	0.0868	1.1068	2.8187	0.0309	0.3103	1.8985	0.4243	22.0479	0.2465	0.5695	0.9322	2.0021	0	0.8256	11.588	34.7557	1.0247	3.1173	0.2962	22.2046	0.1277	13.9764	3.7288	5.0382	0.8046	2.3954	84.9762	79.8621	0.3359	22.3884	3.8609	61.5885	0.0321	0.6165	3.6931	2.1595	12.4535	3.4404	19.7182	10.3242	0.4045	4.3692	2.9169	0.1769	27.8813	0.4685	4.3808	56.6518	3.2558
30a85d1a-7022-4fa5-a908-ec0dca4fc202	0.5919	0.085	4.217	0.029	1.3388	5.8139	1.6473	22.5491	0	0.714	2.6706	4.8649	0	2.4657	17.8025	24.6196	0.277	4.9926	1.9095	16.9988	1.2307	10.3623	5.8322	7.3237	2.2091	4.5813	54.8926	69.1855	0.2791	35.8583	233.981	46.0263	0.0302	10.7139	11.2505	4.8428	12.4067	20.1982	34.269	19.1122	1.6089	6.5173	3.684	0.8317	31.8528	0.2318	20.8468	35.2636	0.6679
c117f486-fdbe-4fc6-b73d-793353ec4051	0.0899	0.9689	5.9834	0.1395	5.5638	22.7977	1.4524	18.7954	0.3391	0.9858	5.8208	16.3484	0	35.0296	23.4871	41.2248	0.2603	16.8717	0.2388	10.0072	3.4777	8.9873	5.3106	5.7621	17.9116	18.189	53.5665	263.453	0.3969	28.8685	185.414	13.1323	0.4355	33.527	21.6574	1.4081	19.4842	106.843	51.6565	23.3687	1.4926	5.8268	5.3568	0.2996	52.9478	0.1113	44.0523	45.809	0.3341
c55eba70-26eb-410e-ae89-38002be84a92	0	2.6036	0.0843	0	0.4122	0.1719	0.309	30.8581	0.0366	0.1805	0.2943	1.792	0	0.1154	7.6739	20.8183	0.0609	1.7324	1.7597	2.8065	0.3035	18.9215	1.6978	2.442	1.1856	2.1522	15.4353	69.2149	0.1671	38.1718	6.9815	8.5689	0.1146	0.2718	0.8996	0.1435	5.0606	2.7571	10.0713	7.6278	0.4991	3.6803	0.7372	1.1563	26.2918	0.0879	4.887	6.4724	0.9144
7298e35d-8405-4662-bc88-6d9fecb41286	0.3407	0.9861	6.4344	0.0132	1.2502	3.9004	8.3193	18.0456	0.2374	0.8451	2.0076	4.4071	0	4.9471	10.8356	20.7293	13.1575	3.4904	0.2173	13.2699	2.2273	9.494	3.2218	1.6457	2.2317	4.8312	26.2925	126.594	0.4481	28.0518	35.1339	10.3318	0.3853	2.7323	12.0768	5.0178	9.3073	17.1226	20.0605	24.6361	0.9588	6.7228	2.4225	0.2272	32.9246	0.19	18.2532	14.5106	1.1655
4c9805fe-06f6-44e9-bec8-2c62a813b2cb	0.1039	1.8168	0.3225	0	0.437	0.6059	0.6815	38.1273	0.0959	0.6908	0.8787	2.2656	0	0.9765	7.8942	20.547	3.4709	3.9155	1.7825	9.1576	0.7337	15.1804	17.7852	8.252	1.3252	2.5734	6.1883	65.6654	0.3067	22.7813	32.0664	6.133	0.0616	0.238	5.3575	6.409	11.0595	1.762	42.8034	12.8053	0.2681	3.3363	3.1161	0	30.1621	0.0708	39.5077	7.6771	1.6438
61521805-104e-45ab-aed9-40c7b6aef216	0.0297	0.1699	0.6424	0	0.2871	0.853	0.8704	21.0987	1.0798	0.3635	1.1554	2.2401	0	0.4317	8.2761	18.0443	0.1314	0.5997	0.2025	5.6636	0.0982	3.7798	3.8839	5.0768	2.3108	3.1	9.6956	46.5106	0.1923	13.9679	2.8121	18.9928	0.7693	0.3875	5.1641	1.1648	4.6767	4.3218	19.0075	7.4982	0.4255	5.3194	1.8903	0.9678	21.9862	0.2529	9.995	7.4888	1.3357
e7766ea7-e3c8-4bcb-ac94-1811088a0aea	0.1951	0.1405	0.5269	0.0214	0.2145	0.2624	0.738	48.1463	0.0266	0.6561	0.6444	1.887	0	0.4364	6.92	18.9917	0.2302	2.0891	0.1755	3.2535	0.1655	5.1906	9.6588	10.2409	0.4449	2.1402	5.6789	73.0506	0.2862	16.1367	6.5555	17.3922	0.0222	0.0756	3.9694	0.3245	8.1171	4.4241	39.9582	11.9426	0.3226	3.657	2.791	0.2446	17.5324	0.0852	27.9007	8.0002	1.6366
acd579de-3565-4165-a580-39b669295867	0.0182	1.1194	0.5137	0	0.23	0.4784	0.9083	7.4207	1.0871	0.2073	0.3793	0.8627	5.2908	0.9382	6.7365	15.4835	0.0215	1.6527	0.0178	4.4567	0.5833	3.4168	5.0054	2.297	0.6488	0.5889	13.1414	41.6508	0.105	15.8584	13.9238	12.4985	0.081	0.0919	3.5364	0.1803	9.9728	2.9066	21.0786	5.5717	1.1107	5.2185	1.5451	0.2601	23.2892	10.6658	9.6688	5.0928	1.4171
338cc1ad-1ecb-4440-9c0c-3f4002110d50	0.0064	0.4589	1.8319	0.2865	1.2899	4.1041	0.3748	15.6508	0.3674	0.6372	0.6947	4.7079	0	13.5113	5.2483	17.4082	2.3418	10.4165	0.1121	13.6622	0.9587	12.3752	1.4466	1.3174	2.2742	4.4997	17.4636	120.72	0.1794	19.5972	194.67	12.6228	0.1988	4.198	3.3924	1.8837	7.2949	30.0687	13.3657	11.1031	0.4946	2.7681	1.8073	0.8595	28.4613	0.5662	3.356	15.5316	2.0391
dc1637a7-e6ab-4e2d-bcf7-aafe245df5aa	0.2663	0.0372	0.0779	0	1.1433	0.149	0.6918	9.1473	0.0042	0.1877	0.4801	1.6141	0	0.5069	5.5369	38.0059	0.0422	1.0223	0	2.1747	2.2625	0.4584	1.857	3.8422	0.1591	6.5092	1.1882	175.977	0.1073	14.6126	42.5134	7.4803	0.0353	1.1963	1.9985	1.3338	5.7781	7.0987	12.6656	7.2588	0.47	3.3017	0.3468	0	25.1816	0.0271	15.1033	3.476	0.8781
7ab7ccce-678f-4e1e-afac-97a10626613a	0.1609	1.0205	2.7777	0.0111	2.8407	0.3566	0.7018	14.7152	0.0028	0.177	0.9505	2.0976	0.7528	1.2885	14.8384	11.7047	0.8037	2.3459	3.1706	40.9584	0.0401	5.9711	15.1313	15.5213	2.5504	3.3726	7.562	48.2658	0.577	17.3008	0.7824	2.4215	0.2421	1.4011	11.3681	4.011	12.4239	3.0695	104.219	5.4471	1.0932	7.8461	3.3757	0.6978	21.5137	0.2122	64.0641	13.7466	0.7429
3c603370-b004-4265-802d-c71574eda3fa	0.5645	0.3163	2.5178	0	0.9312	1.6999	0.7667	16.4503	0.3005	0.6836	1.151	5.0193	0	4.3716	20.0755	17.6967	3.5615	3.6396	0.4655	16.5696	2.0437	9.7716	2.9976	3.3153	0.9658	6.4514	11.4947	100.147	0.3985	26.0919	400.272	63.3666	0.0643	4.9529	8.2005	3.0723	9.7777	21.0068	20.8453	14.5532	0.7624	3.8722	1.4697	0.4424	20.8896	0.0247	20.1203	13.4791	1.5986
640af165-9574-4e29-a6ba-2d04cbf22c5d	0.1267	0.3163	0.031	0.018	0.1172	0.095	8.9295	21.0952	0.3641	0.3323	0.2465	0.7586	3.6754	0.0283	5.1284	17.5406	0.0149	0.498	1.3825	6.8616	0.6986	0.8115	3.8838	5.899	1.7654	0.9068	3.0318	5.8888	0.0866	23.3198	1.3223	15.7631	0.0375	0.2147	1.5624	2.3559	8.3586	0.2568	21.12	1.03	0.8079	2.0761	2.1974	0.1032	11.4426	0.2446	8.3991	8.7608	0.9326
bdb62a86-c15d-4505-92fc-91384aa2cfd2	0.1239	0.1289	0.1446	0	0.7592	1.1353	1.6854	33.9646	0.0754	0.2477	0.9621	3.1168	0	1.7424	3.0771	12.3977	0.3551	1.5561	5.1406	6.9985	1.9525	3.8273	12.1624	9.1358	4.3043	1.3054	12.429	26.3732	0.9747	26.8852	4.5856	8.8648	0.2884	1.2973	5.9629	7.3283	14.6539	2.2835	61.9052	8.7241	0.3552	10.1172	3.2218	0.4328	18.211	0.5831	24.35	8.7875	2.317
891cdc8f-5bda-455c-81f7-cac85d470368	0.7112	0.8916	5.5841	0.0478	1.102	3.1625	1.5996	6.5023	2.0748	0.8522	1.2288	3.8637	0	6.9532	7.4157	24.3259	0.0595	1.5411	0.262	9.7961	1.3837	14.1534	3.614	3.7967	1.8184	5.0642	12.1331	70.5415	0.653	16.6376	1.3641	17.5185	0.199	1.1005	5.2163	0.1869	10.1126	15.7901	29.1997	12.0475	2.0588	8.4037	1.651	1.2324	27.4998	0.3435	13.8387	6.8139	1.7867
9460e172-628a-4cc0-bd66-ae2635b858bc	0.7634	0.1637	2.5126	0.0124	0.7056	2.0821	4.4422	17.1401	0.4405	0.5504	2.088	2.0101	0	2.3465	9.9473	16.3543	1.9392	1.7372	1.2607	10.4073	1.1312	9.2953	6.2581	3.9505	2.1513	4.1403	22.941	60.0895	0.3209	27.3401	4.3934	12.3511	0.7766	0.7607	10.5431	3.1001	14.6535	7.023	28.5365	14.0435	1.6035	8.091	2.5857	0.285	33.4989	0.1588	19.4393	10.1056	1.2394
437aca11-9d03-4e9e-82d1-6acf2ccc8738	0.0155	0.4741	0.0532	0	0.1564	0.1704	0.815	13.8275	0.0033	0.4879	0.4305	1.5035	2.698	0.1664	9.7796	9.7311	1.0753	0.7311	0.7793	18.4802	0.2256	8.1905	7.0453	4.0037	0.6479	0.9059	11.2921	20.1839	0.0937	12.0323	4.2781	6.56	0.179	0.0468	6.3038	8.3307	10.0189	1.6792	95.7019	4.6054	0.9195	4.9747	3.1981	0.8336	9.6395	0.0845	47.7149	9.7495	0.6592
7bb50c4c-9d31-4cbf-bf0d-c0f1194b3bdf	0.0221	0.8853	1.0828	0	1.4124	0.4878	0.864	58.2645	0.0392	0.6378	0.3411	2.8191	0	1.3348	4.8724	12.6628	0.2934	1.9186	1.809	2.5483	1.3163	2.0174	24.9222	11.6585	1.3434	1.1063	5.0224	35.7566	0.3261	16.2946	58.9142	20.2823	0.2945	1.321	9.2113	3.6254	16.3894	5.2536	148.782	5.2007	0.6414	3.8849	4.5872	0.3602	14.5954	0.0126	31.3323	7.0568	0.9642
0bf230e0-4ba6-4fcd-a32b-8ae82ed87e33	0.1288	0.4654	1.6768	0.0723	1.0941	0.5588	0.9358	9.8708	0.4256	0.2489	1.0095	5.8927	1.9663	2.7287	7.6581	12.1429	1.2955	3.5964	0.2377	15.1245	2.6161	1.4652	3.133	2.266	0.844	4.0159	1.546	120.334	0.2488	14.0402	118.688	23.6665	0.1204	1.9834	7.0036	1.9219	7.916	18.3572	24.9371	7.9151	0.4662	3.9018	1.692	0.4142	13.3296	0.0462	17.9174	5.4307	0.9979
35b681b7-178f-4057-be97-096cf9b8d1ab	0.477	5.3085	2.9215	1.0957	2.4067	8.4725	1.2161	4.597	0.828	0.4353	2.3796	3.6515	6.0176	4.2451	7.858	8.918	6.1397	3.6009	0.9095	4.7431	0.0572	27.0782	1.3733	0.855	6.1112	3.7591	3.2552	53.4641	0.6381	20.3831	42.0365	34.9971	0.2303	5.5785	6.6816	3.5368	3.9761	20.8098	8.656	8.3556	1.371	11.2409	0.9358	1.5846	12.4703	0.4063	10.3456	8.7643	6.2773
8befb9ff-1628-4469-9b84-4fa9c72efd19	0.5985	2.4431	3.8912	0.4423	3.5424	2.8183	4.0931	5.1834	2.034	1.4494	2.4096	4.8801	0	2.6263	20.9691	13.8329	9.3308	3.9591	0.8076	6.2964	1.625	13.3825	3.104	4.7449	3.0716	5.1296	7.4908	62.186	1.9882	14.2441	37.9139	118.094	0.4091	5.1559	7.1665	3.1576	6.5685	20.8706	21.9316	10.2102	1.9795	7.6239	2.0774	1.1257	17.2126	0.2353	13.0828	10.6054	5.2727
8b2404ad-3251-4661-a680-a79227f79fe9	0.1936	2.0325	3.9232	0.1315	1.3984	3.2758	1.2317	38.3253	0.5246	0.4617	1.5941	4.4579	0	2.5982	7.4228	32.2419	0.2025	2.0033	0.463	24.2491	1.9604	5.3689	9.7036	10.9225	2.0351	5.0723	42.6224	94.9827	1.178	43.8822	25.7184	31.8416	0.1954	2.2247	10.8899	9.1499	18.5166	13.5229	78.332	15.3507	2.2131	13.1809	4.7247	0.8605	43.7085	0.5097	16.6872	24.8937	0.2879
58966ed8-3591-4c18-8dbe-0cf5bb5f75a9	0.7902	2.332	3.0093	0	4.2587	9.495	1.5355	14.5578	0.4053	0.6408	2.545	11.4605	2.0843	16.777	16.4446	24.8055	0.8138	5.6714	0.462	11.3434	1.6797	5.3497	5.1892	4.3105	4.6649	5.4982	20.1873	135.605	0.6747	31.7126	219.8	41.8918	0.0638	18.8141	15.4716	4.554	12.0105	22.7556	31.0023	16.9401	0.9883	6.0027	3.6412	0.8782	30.518	1.6644	19.4814	26.325	4.5249
415b79c0-10e4-403a-9d45-dba9a7b7dae6	0.2206	0.8034	3.0775	0.0262	1.5768	1.7302	1.3098	14.7902	0.0326	0.9968	1.3816	2.312	3.5561	2.0974	12.7741	24.8028	5.5536	2.4792	0.2508	17.6628	1.1896	18.048	8.4106	6.3998	1.5263	2.1868	22.5203	45.5579	1.0718	41.4842	12.083	17.2683	0.1633	1.3894	6.2393	7.3379	14.9175	4.3702	38.8061	11.0079	0.9485	9.1016	3.696	1.0488	25.9458	0.7517	19.4199	18.7386	3.7597
3eab23e9-4fbc-4acf-b9a8-9f5b613e3154	0.2864	0.2235	1.7541	0	0.1314	1.1385	0.6772	58.4	0.0069	1.4004	1.0614	4.9352	7.5548	1.529	11.6013	34.8075	0.2535	2.8361	0.1142	10.8623	2.599	5.0039	12.2883	11.6583	0.7238	2.6067	20.8023	108.796	0.6536	14.6687	3.02	8.3681	0.1735	1.1807	3.8703	9.4235	30.386	8.8525	120.052	12.4149	0.3219	7.3299	3.4855	0.7958	25.1736	0.1774	16.5673	9.6938	0.639
7241900e-f913-49b9-970f-74f571a3a47d	1.7763	0.0767	7.6006	0	0.6608	1.9636	5.1873	19.6999	0.0523	0.6443	2.3234	5.824	2.3752	2.5271	14.9894	37.4995	1.5069	2.3733	0.1915	23.7078	1.0654	18.092	11.7084	7.3494	0.9831	7.2173	33.3992	182.576	0.9015	48.2598	2.5636	6.8267	0.3637	1.4173	14.4137	12.9889	11.9347	9.6846	57.2952	35.0378	0.7391	11.5954	3.583	0.7005	52.2432	0.1116	21.9472	18.379	0.6697
f069599f-19ca-44eb-b0cb-52eeefc35b82	0.7314	2.3023	1.7006	0.0265	0.3284	1.5642	2.9428	34.8476	0.0264	0.8131	1.0356	4.6101	3.5968	6.2395	11.0302	34.5737	2.2162	2.1218	0.761	12.9073	1.8048	5.6283	9.9994	18.9368	1.2406	4.744	9.5805	65.4102	0.4082	37.5135	50.4674	14.7977	0.1927	1.0135	9.5849	9.7772	5.6927	9.423	62.7496	12.5544	2.092	4.5477	2.7875	0.0758	27.0105	0.169	34.2306	10.1956	5.4253
d097d365-93c6-406b-a3fd-31416eba96a0	2.5163	1.3595	0.228	0.1987	0.6198	1.7393	1.7815	32.2706	0.4637	1.1133	0.8093	3.2235	1.0801	8.6937	5.6171	76.322	0.9093	4.1157	7.1606	9.9764	2.3403	6.063	23.8065	17.0852	1.9206	7.2551	13.3576	100.56	1.0248	34.3104	8.2466	7.1053	0.3804	1.3606	14.2392	5.596	11.2193	4.5891	56.9236	15.9054	1.6885	7.4445	2.2676	3.8681	41.9643	1.9279	36.2642	22.0533	1.3703
3a4f25a2-0d9c-4a3b-9ed7-92cf599ad714	0.2541	0.7425	1.4303	0.0808	0.3682	0.5538	0.7056	15.6722	0.9611	0.4822	0.3917	1.5928	4.7056	0.5805	11.0192	8.9922	0.1435	1.1777	0.5373	4.7341	0.4174	2.4155	6.3002	3.2686	1.3946	0.9864	20.3544	18.878	0.2918	17.3412	4.2637	30.744	0.0961	0.2006	2.4969	12.195	7.0138	2.4805	30.4654	5.2751	1.5573	5.2335	1.6425	0.1322	13.4655	0.1658	12.1892	9.8132	0.5307
6e767c5a-d5a2-4052-99e2-163c0f5f106b	0.7698	1.3912	0.1158	0	0.6133	0.7762	122.59	37.9195	0.0791	0.7087	0.5437	3.6397	5.8781	1.1783	8.0236	37.2423	0.1793	3.3183	0.4738	5.0291	0.3575	28.1948	6.6668	10.2696	2.4329	2.9224	11.6921	28.699	0.3791	21.3297	312.522	4.1678	0.93	0.4176	2.5504	2.6036	7.4066	4.4426	39.2227	22.4642	2.526	9.531	5.0278	0.0826	88.4782	10.6993	38.9634	11.5136	4.1984
437a7292-1c08-4f71-b59b-2749a08af81e	0.8484	0.0268	1.6795	0	4.194	20.256	3.5014	37.8694	0.7937	0.8993	4.1574	13.3332	2.4865	20.0142	5.8151	26.7745	0.0607	5.5446	0.2505	16.3883	0.8507	10.8698	9.1619	14.4062	3.8498	8.3581	15.3377	135.515	0.4441	37.4624	54.1718	6.7081	0.2284	18.5937	26.417	12.5809	20.6705	42.2594	65.0926	16.7245	2.5055	12.0078	8.1076	1.1524	28.8151	0.292	33.3519	28.1098	0.9114
bf9f6420-579f-40ed-9be5-dee24e8975cd	0.5912	0.0415	3.027	0.0142	3.6701	3.0209	1.2691	8.7879	0.9547	1.8474	1.3372	7.9963	1.9275	6.7764	12.3743	23.1991	0.7173	1.284	0.0777	7.0237	1.4068	3.6704	4.7347	5.1729	2.9547	4.5481	8.964	106.871	0.7746	24.7656	52.9336	12.7997	0.0295	9.0916	8.8149	5.2825	11.1659	24.0178	39.0918	17.0893	0.8711	9.3927	1.6586	0.4873	31.7332	0.7922	14.6092	14.4835	2.6084
765f93ff-94a2-423d-949d-c6fba247f056	0.7462	0.081	1.2877	0	0.3929	1.2485	0.847	21.9174	0.0069	0.3745	1.3846	7.1582	1.8828	0.1742	6.9476	32.6081	0.7466	1.4455	0.3794	8.9939	0.1575	3.5542	4.4688	10.2844	1.5586	5.6478	7.8153	138.101	0.1751	23.8523	8.9566	83.1662	0	0.214	7.0376	3.5003	10.1261	17.5423	27.5656	19.9075	0.7673	6.8276	2.8695	0	31.5235	0.2211	39.4852	18.3271	1.4863
8c9fd28a-2b4d-4af0-a3e5-089e7405636c	1.7385	2.2231	1.3445	0	1.2365	2.5122	5.246	10.4649	0.0223	0.5495	2.3865	5.0578	3.6466	3.3457	12.9251	14.8401	1.6759	3.5202	3.6986	11.7283	1.6727	14.955	6.3349	4.3752	3.5776	4.4782	17.9741	37.2639	0.5518	43.0886	49.5142	18.6792	0.0372	2.2566	12.1764	11.1745	9.7313	6.2995	41.2864	13.7812	1.7562	15.2728	2.4764	0.6146	33.061	1.3275	22.1529	23.2832	3.1186
78c9a15d-7bdb-423b-aa86-2ba438414d46	0.0453	0.1945	1.3461	0	1.0003	0.736	0.8572	15.147	0.0241	0.2675	0.5473	4.1523	0	3.0793	10.253	20.6708	0.1103	1.0949	0.1325	8.7107	0.8122	6.4775	2.5916	2.3353	0.7559	2.9088	12.8034	92.7505	0.1529	18.2063	33.3119	33.3074	0.2768	0.5293	4.3222	0.3465	8.7386	10.2405	17.466	10.3852	0.2923	3.2904	1.0054	0.277	25.0367	0.2702	10.6032	12.1117	0.6488
56ae28a1-740a-4c08-8ca5-2e88b449d741	0.0129	3.4527	0.2535	0	0.4895	3.1193	0.4527	19.8907	0.0138	0.9164	1.1849	3.835	1.8768	0.3039	5.5166	49.6161	0.1832	1.7694	10.8167	15.0315	1.641	13.457	11.4013	4.2667	5.15	8.1994	17.7432	124.877	0.4609	32.4391	0.6752	2.0253	0.2012	3.742	10.4982	9.4003	12.3435	11.7293	67.4799	28.5472	2.0441	8.5198	3.7166	1.1862	39.6799	0.6612	14.2655	9.57	3.0162
584d7e61-e2a6-417a-b1e7-bd48fada04fd	0.2763	0.0308	0.4996	0.014	0.4066	0.3862	1.8913	10.7156	0.0105	0.6386	0.7349	2.8246	3.8173	2.5605	6.0139	13.5058	8.4824	2.0257	1.7308	15.7247	0.5079	6.5422	4.4509	3.3295	1.5653	1.7633	7.8934	47.3155	0.3835	42.3548	2.3271	9.0704	0.0292	0.2169	6.1438	9.017	10.309	3.0002	14.8631	8.6801	0.8485	8.1447	2.4439	0.1206	28.4315	0.3698	21.131	6.5415	3.2018
245a08d4-fcda-4bbf-b213-6e815d914e1d	0.0315	0.0983	3.3961	0.1009	1.9314	4.5107	1.3171	12.282	0.0872	1.554	2.6637	12.0792	0	8.7959	10.0532	31.4925	15.0572	7.0132	0.2026	12.2819	3.4055	29.6842	4.6125	5.585	2.7887	12.8102	4.2793	256.512	0.432	37.8657	157.976	39.2978	0.168	8.0957	12.4215	7.849	7.1359	64.236	30.1134	27.9253	0.9347	10.2981	1.2747	1.3095	54.0041	0.4509	40.5803	7.8454	2.4227
829c5a9a-cc8f-48f9-8a44-7abe9e57d67f	0.5853	1.3136	2.868	0.1307	1.1582	2.4854	1.3171	26.8667	0.6761	0.4617	1.9176	8.1931	2.2201	4.1594	8.2024	21.2655	1.4627	3.9291	0.4697	23.092	1.1815	4.9997	10.815	12.302	1.004	7.2155	12.9705	87.5123	0.4254	21.4355	18.1935	19.8571	0.119	2.6653	14.0486	7.2334	9.6373	16.9624	89.5775	14.5367	1.3735	9.7954	4.2582	0.3274	42.4001	0.8864	34.5054	10.8672	2.2534
e0ad3f97-ddf5-40d6-abbd-2e0770b755bc	0.3738	0.6043	0.3761	0	2.4081	0.3002	0.8334	17.1444	0.9096	0.1401	1.0481	2.1107	1.9368	1.1648	3.4545	25.8842	12.04	2.7444	6.4398	19.4243	0.8688	6.3822	9.9654	4.9228	1.722	2.7163	24.4961	55.7107	0.5189	18.3715	9.0586	13.5653	0.2372	0.4861	4.3777	6.2114	13.9581	9.6685	42.4468	24.2287	0.4305	9.6934	6.3253	0.0816	36.497	2.6611	12.907	17.8132	0.3276
ea2f3ea8-e62f-4de4-a70d-807fba91874f	0.3077	1.9099	0.1841	0	0.8665	0.0805	0.5008	2.2912	0.1067	0.582	0.7419	3.0213	0	0.7684	2.4941	30.5146	2.5017	1.7524	6.2343	2.936	2.2022	4.2806	1.6197	4.9661	0.4297	7.0315	1.2656	103.693	0.5215	24.1012	4.7311	1.6482	0.0318	0.5408	2.4744	3.1902	4.9294	4.1935	21.3529	13.8336	0.3692	4.8768	0.5543	0.9186	38.5642	0.0488	29.442	4.4288	5.8541
042bb5d0-32af-4905-a09f-6baa2133ac78	0.1111	0.5337	1.6756	0	1.5313	0.9613	3.5093	10.227	0.1274	0.7178	0.6884	3.9014	4.9612	3.6721	17.7541	17.1808	4.6458	3.5989	0.2499	8.0176	0.7355	12.7747	1.7704	4.8951	2.1675	3.686	10.1152	72.667	0.2031	27.6618	38.1776	138.76	0.1139	1.7857	4.0361	2.9159	8.5764	13.6593	17.2995	13.8409	0.9373	3.8334	1.5817	1.1497	31.0678	0.4952	13.4676	14.5764	1.1889
0512be6b-9c9d-40b5-9ece-3a6c9ac4ecf8	0.4819	3.7196	5.6024	0.1122	0.6852	8.0126	1.7237	7.2135	0.1679	1.6551	2.187	9.0986	5.0845	0.8232	44.638	28.9965	0.0465	3.7745	0.666	30.2692	1.2563	59.5251	1.2659	3.4114	6.3913	8.0928	5.6404	146.925	1.3149	43.1308	5.4879	14.2182	0.8563	2.0468	9.9049	5.9281	6.2113	23.3473	18.9356	23.5766	1.2432	6.9421	1.3442	2.6778	51.3277	0.1493	22.2461	7.5191	6.5942
47b71b49-52e7-4044-96e4-cb79775b50ca	1.0204	0.1408	3.4351	0.0074	0.8318	2.7837	1.6741	32.8722	0.1108	1.1291	1.2156	5.6868	0	8.2688	5.8466	34.1103	0.0737	2.6264	0.0812	9.1342	1.7226	12.2563	18.5193	15.9138	1.5746	5.8285	13.7002	167.204	0.8169	36.7125	9.5407	3.2183	0.0771	3.7008	8.1658	5.5585	29.0296	26.3441	67.6732	13.906	1.0819	4.9339	2.9704	0.7637	33.2746	0.0355	34.1546	8.9015	2.6405
e37c9183-b6d0-4800-971d-6a0a70ba7c77	0.536	0.0253	3.2892	0	0.8195	1.4136	0.8141	8.1905	0	1.2215	2.1796	2.4705	0.7854	0.4723	18.8295	12.9011	1.9261	1.6893	0.2058	18.7341	0.8718	11.666	5.7749	4.3893	0.915	3.6105	5.1033	64.9514	0.4734	54.0501	2.3548	66.8919	0.1684	2.0495	13.387	5.7552	10.1982	5.118	15.0008	13.5072	0.838	4.5239	1.6571	1.2575	27.1381	0.2951	28.8791	12.8137	3.1002
8b416c74-f913-4e37-9b2a-cb0bf92b1819	0.821	0.7148	2.1549	0	0.5847	0.5093	1.9333	46.9031	0.0059	2.6814	1.1242	2.0369	11.3432	1.012	11.7416	12.0016	3.89	4.0754	0.2776	10.9435	1.3367	3.1529	11.713	8.5828	6.8684	2.8362	3.8521	71.0818	1.2602	12.3447	8.8422	4.9349	0.3474	1.7612	7.475	6.993	26.6931	15.4067	139.717	6.8947	0.8284	14.0646	2.9401	0.2048	21.1861	2.3406	28.6012	6.4915	0.8681
9b2a6e97-406d-4f56-8501-724de5137139	0.311	0.751	0.4169	0.0251	0.3109	0.4985	1.3208	6.2346	0.1437	0.3387	0.6614	2.6144	0	0.315	8.3817	18.4222	2.7835	2.0376	2.23	3.9922	0.8672	6.174	9.2968	5.1874	3.9931	1.696	6.4651	31.8959	0.5448	22.056	9.5962	10.723	0.4692	0.6047	1.2727	4.318	13.5777	2.3356	58.1735	10.714	0.9208	6.2635	2.5859	0.9325	23.6982	1.8793	35.813	5.3305	2.736
34c34585-fae1-4b0b-934b-4950b557063a	0.0176	0.2743	1.6791	0.0188	1.053	0.7794	8.0283	32.2457	0.7344	0.5533	1.6185	3.1259	1.2748	0.8551	6.6588	25.2446	0.3111	1.8639	0.0771	32.0535	0.1454	5.1718	16.1018	19.0184	0.8989	3.5686	17.3977	56.1129	0.2324	26.3755	3.924	12.0504	0.2342	0.3622	6.5813	2.3374	13.6535	5.4165	68.1085	7.8275	1.7663	5.4176	3.3703	0.6983	35.05	0.0898	29.0417	16.2364	0.7548
6aa28bec-36c5-4a17-b0c4-c3fc24c4f050	2.235	1.9092	5.3275	0.3707	0.8191	17.6592	2.2853	39.9027	5.5225	2.615	1.4896	2.9302	4.3818	1.3682	14.1653	44.717	4.0364	2.0407	6.5341	31.8999	0.9828	7.0744	17.3453	3.2166	1.9143	5.7672	22.4081	49.586	0.8152	25.7561	7.7071	6.5926	1.7443	1.38	7.7652	12.7788	10.874	3.2978	78.3916	16.8573	1.2337	14.8893	4.9631	1.9385	49.1965	0.3602	14.5068	20.8727	2.1002
2fc30776-1bf8-4481-9145-4e3dc5556aca	0.0555	1.4294	3.4845	0.0222	1.8378	1.2048	3.3073	20.676	0.8568	0.6371	1.6061	2.0194	1.0066	14.4114	8.9353	15.9295	0.1965	1.4774	0.6694	19.5598	0.1377	3.6502	7.5012	8.7398	1.0647	3.4339	14.8842	32.8769	0.2547	37.187	2.2935	13.0554	0.2158	0.6912	10.7117	2.9966	14.8484	5.6385	71.0004	11.3351	2.3716	7.6537	2.4733	0.3393	40.3474	0.8511	30.2172	19.5282	0.823
6a98f206-8b72-4b16-af6a-ec568019fc7c	0.055	0.2809	0.9553	0	1.9171	1.1992	1.3429	30.7472	0.1011	0.8132	1.9323	2.1557	1.4506	1.0737	5.003	18.0476	26.6457	2.252	0.0585	16.4443	0.0221	7.2542	7.9212	7.2137	0.934	4.2303	10.4246	81.7494	0.3401	47.0201	4.0012	41.5129	0.4886	0.5084	9.9385	14.3087	14.7786	5.5278	103.939	22.9143	2.4505	11.9345	3.4441	0.3056	35.7882	0.7325	31.2245	4.9879	1.4723
3e4041a1-13b5-48de-b952-0dcee41c4232	0.3722	0.9215	0.8962	0.0411	0.2428	0.7055	0.7041	8.1285	0.0342	0.3367	1.1239	3.3898	0	0.2153	7.9302	19.7155	0.3067	1.356	0.3752	5.5759	1.1326	8.2943	3.4306	4.3507	1.8554	2.0519	7.0142	50.1077	0.1524	17.9985	7.667	33.4837	0.114	0.4586	3.9632	5.1509	8.1547	3.406	25.9859	11.0064	0.5794	5.2646	1.7954	0.0785	16.7191	0.3499	16.3734	9.8175	2.625
11f1bcdf-e5f6-484c-8cdc-347dcee69169	0.2013	0.3866	1.5045	0	0.5598	1.8826	1.6107	10.0227	0.423	0.5416	0.9453	1.9842	2.9948	3.1517	8.3052	15.2363	3.4621	1.7244	0.1207	9.5608	0.6034	7.0418	1.7397	1.8911	2.0659	3.0583	7.694	62.6799	0.195	22.878	5.088	29.1167	0.0229	0.7091	3.1475	1.9515	4.878	6.619	9.8337	16.8624	0.6324	4.5096	1.2032	0.8202	18.8029	0.1583	10.2656	7.4175	1.7731
36bbd5d9-b082-4cb7-9a72-2dbf857cd5f0	0.2679	3.2333	2.9251	0.098	2.4136	2.4287	1.2306	2.7647	0.5758	0.3213	2.3881	7.0771	2.2208	5.89	7.969	8.9431	0.5916	4.4213	0.9845	7.2774	2.0317	5.0134	1.7447	1.4491	2.2128	4.8077	4.2594	83.8263	0.3829	15.0408	133.873	12.2666	0.1247	10.0159	9.7071	2.3362	4.8798	39.8306	9.8678	12.0516	0.9269	4.2508	1.1704	0.7485	16.0514	0.4607	20.7252	11.8369	3.7359
8cd4eabb-e640-4172-ae74-c1c79784d1aa	0.0072	0.1799	2.7175	0	1.3265	1.2778	0.6131	28.8904	0.8588	1.1339	1.16	5.9011	0	1.982	7.9783	53.4936	0.1275	2.867	0.1685	23.7581	0	8.6865	21.3332	27.0221	0.7369	5.8504	27.2738	126.164	0.8165	22.1303	2.0887	7.5466	0.128	0.7225	5.2385	4.8066	14.1626	3.6635	108.275	30.564	1.3936	7.6522	3.8786	0.9686	44.2542	0.0736	23.9393	29.1189	1.4142
a8bb4e74-6afc-4697-aeb2-f9e7ba2244a7	0.0873	0.0511	3.3944	0	0.7844	0.6406	0.8874	10.0953	0.0174	0.4007	0.6369	1.9601	0	4.1003	11.2994	15.5707	0.618	3.4579	0.3508	13.7297	0.5054	2.7258	2.4694	3.6232	0.3397	2.8892	13.6319	66.1346	0.6596	17.0454	38.5327	18.0656	0.0485	0.0974	4.0508	1.9718	10.823	5.7601	12.4567	13.0656	0.5981	3.2798	1.6	0.0667	18.0046	0.1487	11.4913	13.4422	0.9371
05d0a2e7-0395-493c-a415-6f695b001786	1.0359	2.062	1.9678	0.1282	0.9847	1.5568	0.7952	28.9465	1.0549	0.9453	1.1182	3.7223	4.3562	1.3602	4.9849	21.002	0.1594	1.0943	2.4579	5.2453	2.4177	8.2232	5.9649	8.3556	5.6427	4.2668	14.7231	46.4934	0.9563	30.9901	7.2267	7.0512	0.4335	0.9696	9.5205	9.4203	12.8186	3.652	65.1879	18.5901	0.7423	27.214	2.6421	1.1012	25.384	0.9208	30.4672	11.4957	4.1758
cb46c9fe-19d7-4915-a3d1-1f4c067193f7	0.4275	2.2025	1.3028	0.0445	4.0774	0.7643	1.5188	10.2724	0.4625	0.7842	1.6652	9.9415	5.0426	11.2201	19.3415	29.2341	0.1969	5.5794	0.4065	8.141	2.768	6.1456	6.5114	4.7764	1.5151	9.7547	4.7272	209.972	0.394	23.755	80.3889	49.1936	0.0618	6.6054	11.4153	2.8671	7.8725	57.589	34.2853	14.646	0.8967	7.6774	1.5214	1.9971	32.8105	0.0711	26.11	6.6141	3.3268
73f5210f-43d7-4859-89ba-5ef66f7bf66d	2.3125	0.3828	0.7296	0	0.5304	1.4446	1.6238	40.9902	0.0093	0.2758	2.8213	3.242	0	0.3527	2.7061	37.6294	1.566	4.5628	0.0512	22.6311	0.4251	11.0268	12.74	18.939	2.6884	3.4514	25.8717	65.99	0.9741	38.8868	1.016	7.4371	0.3892	0.3009	4.4931	12.3729	14.2553	2.6635	70.6521	17.8726	0.6968	9.44	7.6814	0.2142	42.1789	0.1791	23.7019	28.2503	2.6514
bb208a71-73d0-49cf-8311-d88d612434cd	0.2115	0.0413	1.3279	0	0.3335	0.6441	0.9003	14.14	0.0352	1.2486	0.9181	1.7814	0	0.5767	5.4192	12.9959	0.0702	3.2373	0.1932	3.692	0.0729	12.3542	7.4489	8.5385	1.2642	3.8853	3.963	48.6348	0.3711	22.1199	1.6101	7.7215	0	0.0999	3.9302	0.1593	10.5213	3.1793	33.9154	7.1831	0.2274	3.8396	1.7001	0.6465	16.4651	0.0676	28.9108	7.8172	0.3785
86a0a3ab-d3bc-4897-b6ed-97246cccc122	0.8573	0	1.4584	0	0.6848	0.7854	2.9819	113.105	0.431	1.9742	0.9299	4.398	0	4.3788	7.3186	50.2392	0.7503	2.0439	0.3342	8.5933	0.4097	15.8345	22.3163	30.2798	1.737	3.5376	21.5877	99.9458	0.8433	39.836	11.5452	6.9255	0.1481	0.5628	13.952	0.2913	11.7849	8.7413	109.046	15.3854	1.2184	8.1051	4.6061	0.1164	39.5359	0.3083	55.4293	15.9697	2.1039
91338366-f042-4ae8-8b8e-06de5bbc98b6	0.7657	4.9435	1.5846	1.5635	0.3839	1.4497	1.3674	23.794	0.0101	0.574	2.6327	2.8709	2.7599	0.1915	5.0794	30.5154	0.5724	2.633	1.6406	16.4956	0.9022	8.1118	9.5507	6.0997	0.5288	4.5002	37.6728	73.0652	0.9448	20.9369	17.983	3.3219	0.169	0.6993	7.4274	11.6367	20.3984	19.5351	55.9948	17.2271	1.6256	8.8933	3.0974	1.9186	26.3882	1.8149	22.9456	10.0297	0.2723
c8e98775-a1b4-4e5a-9689-c7d585ec25c3	0.5844	0.769	3.9441	0	0.7949	0.3436	0.5852	19.9562	0.0061	0.5111	1.9722	3.8703	3.3248	0	4.7047	34.878	0.1217	1.3232	0.1005	5.0833	0.2907	11.4513	2.704	7.0859	1.0448	5.4954	2.0772	111.3	0.5382	10.0361	5.5157	22.7344	0.2036	0.2913	5.585	0.1487	5.5176	38.769	37.1712	36.2549	0.4188	8.7578	1.3357	0.5603	42.5135	0.1952	20.8822	5.4279	0.4687
cb5a1aac-6103-47b4-bfdf-b73ce075edbf	0.3299	1.5176	0.5105	0.0865	0.4526	0.0723	0.5255	45.737	0.7641	0.3948	0.2796	0.9151	0	0.6603	7.6564	21.4481	23.2458	2.2184	0.6768	6.0798	0.9065	0.5562	6.2994	3.6322	0.9525	0.9253	10.0008	43.1573	1.2185	26.5849	5.4378	21.3113	0	0.0875	6.2772	9.7095	11.7157	0.6719	63.3016	4.0219	0.8337	3.4799	3.9698	0.8491	15.0235	0.0394	19.3435	12.2156	0.5682
4092345f-2795-4070-a761-79e45419e6e2	1.1794	2.0367	1.0989	0.1272	0.8072	3.1195	1.7564	21.477	0.2805	0.9547	2.5763	6.064	0.9102	3.8104	18.6729	20.3662	4.8862	3.8382	2.4027	13.93	1.8476	27.8518	13.9886	13.4347	4.1717	6.5038	19.894	66.0014	1.1074	40.1536	25.1049	67.9591	0.1672	3.3449	11.775	6.774	10.5173	13.4225	59.1966	17.7628	1.1734	14.5607	2.8309	1.0354	37.4394	1.2291	32.1677	20.8333	4.2341
a50f8982-3770-4645-8fa0-70cde24d65f2	0.2299	1.2465	2.594	0.1292	1.5722	2.8724	1.3734	19.7123	0.496	0.508	1.3032	5.1091	3.5111	9.1363	13.3875	29.7059	0.332	3.9939	0.1415	17.1753	0.614	21.6572	5.0117	7.3444	1.3725	3.8006	10.8289	100.462	0.2548	32.8201	146.182	20.2743	0.0269	4.0157	9.0014	0.1458	12.2472	19.1998	23.4019	13.1946	1.1706	3.9307	2.4208	0.1479	25.2721	0.0618	13.4558	17.9325	0.396
35f0d6a3-a27f-4359-b9d1-75c915f311fd	0.9151	0.3709	6.3089	0.0137	1.4662	1.4201	5.995	11.9979	0.4239	0.6066	1.9844	2.8268	2.7951	3.2971	11.0515	13.1295	0.79	1.783	1.5958	9.7867	1.2538	11.9102	5.2422	5.9422	1.9281	2.9814	19.7454	34.9799	0.4437	31.4846	22.868	33.6519	0.1712	1.3458	9.9803	2.8391	12.2978	5.503	27.4985	12.1297	2.0985	10.8638	2.4873	0.314	32.2227	0.8862	16.5832	13.83	1.077
ca55d5a0-2924-47d3-ad98-e0b6fe3aa95f	1.0544	2.0983	1.2109	0.0563	1.064	1.8113	1.0721	13.5411	0.0561	0.4495	0.4378	2.7943	0	0.6192	7.5954	25.5119	3.1613	1.5868	0.7321	8.7252	0.7414	5.2878	6.9188	6.762	4.0158	1.7772	15.315	26.8497	1.0175	28.5661	15.3644	41.6464	0.0293	1.1591	5.5161	5.7171	17.2771	1.4938	87.9037	10.0359	1.1476	7.3874	2.7953	0.564	30.132	0.5165	14.2084	8.2962	2.4799
6bf245e5-f2c6-48af-8490-9e18981c1c28	0.0182	0.2955	5.4761	0.0078	0.3031	2.5379	3.6773	26.8724	0.0698	2.235	4.1332	5.3633	3.1689	1.1727	7.8052	44.2765	0.0258	2.1825	0.2767	16.585	0.3373	25.7471	13.0439	17.5096	3.6433	6.3489	43.6333	72.7609	1.0652	26.7747	1.7735	2.9593	0.6954	2.4362	16.815	1.0865	16.2963	7.4668	71.8756	45.1857	1.3618	15.9804	3.959	0.7566	56.8016	1.6374	32.4075	20.9774	31.6873
b0a83827-e3bd-4458-95cd-7a5b1ef6c5c4	0.5482	0.8184	0.2725	0.017	0.7015	1.4094	3.1409	24.0946	0.812	0.9171	1.0235	5.7665	2.3052	2.4526	7.8349	42.5692	0.7453	3.1232	2.7871	6.2087	1.9278	8.8938	13.6205	7.715	2.6856	5.7088	34.1709	77.8221	0.832	31.4529	7.2798	9.3283	0.3176	1.0153	7.1768	24.7553	21.2883	10.0579	67.8453	24.4905	0.4782	11.1928	3.7163	1.3597	61.7895	4.4124	20.3676	13.5325	3.8995
7cb9f1c6-e4c9-4559-a194-ad9ab9817722	0.8881	0.6552	0.6131	0	0.387	0.4035	0.8094	56.6976	0.1633	0.466	0.8451	1.6246	2.3426	0.3251	3.6879	15.1876	0.1572	7.3131	0.0944	2.0784	0.4809	10.8613	20.7624	23.7054	4.2733	1.4341	17.7911	35.1982	0.6189	32.2865	6.6488	6.9761	0.3228	0.4438	9.8068	4.2652	9.899	1.2944	117.816	9.9075	0.8505	4.6485	8.0755	0.0987	15.1117	0.3576	52.4188	8.7752	2.3777
46d107c6-2399-4c65-8b5c-5b21fd26896d	0.3162	6.2517	0.5463	0.1385	3.2524	2.4211	0.7822	23.9354	8.7057	1.2551	1.1589	3.1904	11.7635	7.7817	7.4826	28.185	0.0646	3.8583	0.6163	28.674	3.9262	2.8829	5.7793	3.8628	0.577	2.0491	11.3145	26.5351	0.4596	25.2994	25.4404	7.7508	0.1801	1.3315	22.0159	5.9971	14.2981	4.1465	35.6588	7.8224	1.6909	41.2429	3.0612	0.2974	22.7076	0.373	33.1602	13.542	0.199
920c2cf9-7811-4330-a17a-fcd12da4b654	0.8206	0.1589	0.2338	0.0136	1.4604	7.5341	0.9506	21.4414	0.1219	0.6342	0.8067	3.5658	0	4.5254	10.313	20.6092	0.1351	7.8148	0.0744	9.0362	3.2276	5.532	20.5255	4.3708	1.5279	1.5203	41.3901	38.212	0.2885	22.8542	0.6641	4.9986	1.2435	0.7605	8.0354	5.0468	18.5773	4.3257	49.5981	7.8063	0.8342	20.7119	5.5591	0.1555	20.5112	0.065	26.6046	21.2791	0.5204
a7ce6542-1cb5-456d-b071-0db4090869c7	0.6288	1.9397	2.664	0.0158	1.1197	1.2384	5.4713	44.0376	0.756	0.6987	1.1019	4.8643	0	4.3688	9.9126	36.8189	0.4976	3.2595	0.4758	19.6559	1.3055	1.8837	16.9575	28.4296	2.0729	2.9983	25.2107	74.8184	0.4632	26.5312	303.141	16.9931	0.0986	1.3418	10.3825	1.2752	12.863	2.9445	110.391	17.0072	1.9561	9.8566	4.8846	0.9043	31.8499	0.2268	20.473	18.8169	1.1498
7914c6cf-464e-4e63-80f6-47f10cc90f35	1.4288	0.3649	1.7502	0.0555	0.5734	0.6978	1.5356	69.738	0.2005	1.2268	1.9218	4.2705	0	1.5691	4.6814	48.3454	5.2766	2.585	0.0759	5.1352	0.3582	13.9168	20.4861	17.4031	0.4333	1.2794	27.8418	221.448	1.2831	60.5009	1.5066	3.9692	0.0577	0.6515	11.7006	2.0225	12.509	7.7194	75.6991	18.0519	0.6283	16.099	4.2493	0.8734	35.9733	26.8865	14.7242	14.4444	0.5844
aa74d8a8-4089-477b-bf4e-25bb23cda909	0.3553	0.0182	1.3984	0.087	1.4253	0.8296	1.851	14.7963	1.2278	0.6113	1.4774	1.9465	0	2.9318	11.8038	13.6585	9.0524	2.5092	0.2384	6.8013	1.3235	5.9609	4.9089	4.1355	1.114	3.6494	4.8931	109.7	0.3773	18.2545	18.7143	23.4812	0.2846	1.2406	5.9753	3.1635	8.0766	7.7927	19.7033	9.7744	0.5134	5.4757	1.5682	0.9969	16.9501	0.4962	11.1187	5.6222	1.2389
81f8bb11-911d-4c35-b636-6d2bd272d94c	1.3123	4.1534	0.2387	0.429	0.6068	1.0803	2.8855	11.6982	1.1054	1.2302	1.232	2.954	0	0.8787	13.5103	31.5158	2.1289	4.713	10.4502	4.738	1.4105	12.347	19.8101	10.1256	4.4421	2.1928	12.9292	44.404	0.6772	39.5941	7.4871	4.2168	0.2841	0.7949	9.1296	5.3336	11.1318	2.2051	47.6657	12.0646	0.9753	11.8684	2.5463	0.9306	17.2568	17.7509	29.4934	10.5901	2.715
d81e80a3-8a10-4d42-81fd-3cebaa3a2c33	1.0157	0.0423	4.8439	0	0.8883	1.0151	1.7932	3.3353	2.8546	3.0556	1.2267	4.2822	3.9294	7.3618	19.613	30.2817	0.1678	2.1739	0	10.1166	0.2091	17.7632	18.8482	9.4291	1.024	2.0556	16.1907	100.831	1.3451	27.0161	1.4137	5.545	0.2407	0.1861	6.186	0.251	12.3779	14.0004	58.121	28.3319	0.5532	6.0723	3.361	0	26.1867	0.323	28.5282	11.9953	0.4431
c4466851-a97d-4bd4-9329-a75ecc915692	0.3093	0.6313	1.6466	0	0.1801	0.5202	1.0014	10.2544	0.6206	0.2497	0.7064	1.6457	3.4517	2.2354	10.7738	18.3768	2.2636	2.1532	0.5912	5.5371	0.7348	7.7733	0.888	1.9617	1.6403	2.1995	20.3973	51.6022	0.244	19.6665	22.1462	21.8474	0.0793	0.6048	1.1232	1.7972	7.0543	6.7082	7.4217	11.1686	0.3836	3.6066	1.1631	0.2181	20.8785	0.304	3.4173	12.3993	2.4816
c59d226c-73f2-4d14-8af9-5130673f9cd7	0.7212	3.6352	6.8731	0.0848	3.255	7.2745	9.0118	14.5735	1.0144	0.5902	2.0246	9.0111	1.9199	15.5868	16.7372	39.3155	4.6849	5.2024	0.0774	16.6843	3.0945	16.0864	3.3778	3.5159	3.6789	11.1548	14.0427	184.274	0.7287	30.6369	103.533	20.7578	0.1764	4.8098	8.9998	6.6968	7.7294	42.8723	27.3278	26.6585	1.0953	12.6599	2.0204	1.1325	49.0045	0.248	14.0205	12.0866	2.7065
77814f14-2873-46fc-b542-70d3a11dd2ee	0.7551	0.945	2.9143	0	1.4736	1.6731	12.1068	14.912	0.6673	0.4298	1.3335	3.8394	2.0669	1.7688	28.5933	27.0171	2.5848	2.777	1.6035	10.9536	1.4457	8.0428	9.1593	4.095	1.9327	2.9619	54.4421	28.5521	0.3192	28.6947	32.1815	57.0248	0.3481	1.5172	9.107	9.3089	13.863	5.5329	32.2602	8.6624	1.5314	14.1915	2.5393	0.7837	36.335	1.0558	21.6064	44.7149	3.001
0084369c-3778-4220-9846-f1193b48e1db	0.8937	0.6376	4.0348	0	1.7392	0.8613	10.5538	37.0137	0.6796	0.268	0.3855	2.6149	3.7045	2.7419	9.9109	26.1853	0.9718	2.4259	1.6423	27.1449	0.4506	5.3367	8.3619	16.5503	1.079	3.4223	47.5751	68.2794	0.2205	24.526	4.5907	33.8638	0.0567	0.6667	7.6237	0.781	8.5954	7.4111	41.4578	9.91	1.3998	4.261	3.1302	0.4682	34.4166	0.174	19.5599	16.8178	1.2533
c04d4ab8-8c79-4f44-9ad4-b71b0aca3194	0.6767	0.1334	7.19	0	1.204	0.7476	5.2013	17.8447	0.0758	0.5233	0.5449	2.0221	0	1.0039	4.373	31.0192	0.2648	0.9218	1.0829	9.9715	0.2043	1.4375	9.9829	11.0942	1.8694	2.6801	23.3194	47.9531	0.1231	23.1361	1.322	2.3806	0.0316	0.372	6.8349	1.4921	14.3874	6.8523	87.6066	10.1634	0.5054	9.1466	4.5858	0.0871	50.0424	0.0485	24.0272	47.0907	0.2331
61d0ab5a-a4fe-4f5a-8064-2b8703b7aab6	0.0038	0.0234	0.0828	0.008	0.1895	0.2346	0.9378	79.0493	0.012	1.419	0.809	4.872	0	0.1512	3.471	34.9836	0.0731	2.8976	0.4392	5.7237	0.4474	0.7399	15.7182	21.5742	1.0692	4.1545	3.0755	75.7269	0.3366	26.8949	7.8416	33.7763	0.0334	0.0826	8.0318	0.7171	9.16	1.3081	81.7947	18.3251	0.7671	5.0236	1.531	0.2755	34.9	0.0384	64.2938	7.208	2.9496
cb871791-fc35-4adf-90e6-0bb363558df1	1.7472	4.7669	1.4704	0	1.0851	6.6817	2.3967	20.9053	0.1349	0.7873	2.9399	5.1998	8.7072	0.2909	7.3953	29.5833	0.5666	1.7313	3.1778	11.1512	0.7503	15.0269	11.995	4.582	0.8009	3.9358	17.3842	58.9888	0.6336	33.4842	9.3206	5.3707	0.3407	1.0217	12.4908	5.5132	12.8147	9.1061	62.4135	28.4941	1.577	10.3551	4.0022	1.1413	53.1044	1.4315	18.4148	6.0095	1.1729
208e125b-9e7b-48f5-b01c-05a55e7d9c27	0.5104	0.8644	4.4162	0.0232	2.6299	4.6805	1.1298	22.7329	0.4913	0.5698	1.6941	5.97	0	6.5226	14.5729	27.4973	0.1442	2.7748	0.0635	12.1557	1.042	11.948	8.9427	8.2821	1.9803	4.6205	12.7907	86.2785	0.8969	19.1224	139.181	31.1897	0.0724	3.6633	10.4056	0.1006	9.417	15.2186	30.9316	11.9211	1.2373	5.9343	3.1197	0.2655	23.5841	0.074	24.385	11.1952	0.9328
ae4211c0-6c47-4fc8-9af5-fe0e4e416c57	0.2813	0.5151	2.3244	0	0.7947	0.5154	10.7755	9.2624	0.2555	0.2755	1.6683	3.6113	1.0881	1.7114	19.6205	13.456	1.8454	1.3084	2.2585	4.6547	1.0424	7.6757	3.919	3.573	2.3853	3.1731	17.7813	26.5215	0.247	21.4391	34.0151	32.9795	0.3332	0.6905	8.9191	6.8333	10.2495	5.7428	33.1891	10.1743	1.3705	13.347	2.3127	0.9628	28.6132	0.8817	19.4833	16.0426	5.0006
730603d9-7613-469b-990b-1b79ab133290	0.1869	2.2497	0.4316	0	0.3771	0.8137	3.8173	15.7405	0.0114	0.1681	0.7523	1.0743	6.1962	0.3583	4.9125	13.4603	0.7749	1.0931	0.3434	2.9205	0.2591	7.6951	1.2084	1.0271	2.4933	1.7414	18.5531	44.9086	0.2075	12.4088	12.3846	18.2912	0.0712	0.3521	2.9699	0.7224	6.9028	7.2901	6.568	12.3924	0.4476	4.638	1.1322	0.3263	19.2989	0.2547	12.9943	8.2017	1.0918
eb949a80-5b60-4eb4-ae9e-e1cbf558722b	1.0321	0.7999	8.492	0.0304	3.1603	6.7938	2.1542	25.143	1.9247	0.6349	1.9343	13.9132	4.1305	11.1779	17.4593	31.1184	0.1008	2.6465	0.1249	26.144	2.3238	10.7382	16.0421	10.531	1.5829	5.6203	20.846	147.574	2.1824	46.1038	14.1175	32.5939	0.1897	5.9271	16.5288	3.7866	19.9295	27.9777	88.5164	13.628	3.1674	9.7921	4.6143	0.8702	36.3407	0.3153	28.4051	22.5162	0.1747
3b0707ac-1ec6-4222-94b0-3f743e127ca6	1.1224	1.1932	0.9564	0	2.9751	2.8044	0.6923	17.6845	0.3031	2.1338	0.9987	4.296	0	1.7467	8.5363	41.6675	1.3677	3.7169	4.6604	20.1902	0.323	23.7199	8.6171	3.9863	0.6512	4.7411	66.0953	105.483	0.4391	16.175	5.7546	6.9787	0.3252	1.6094	5.0642	11.3373	14.2875	12.8597	107.028	19.3602	0.5595	5.8433	3.7924	0.9943	38.5041	0.3048	10.9532	16.1101	0.1331
1c1742fd-f420-44f2-aff5-3eaabbf1ac53	0.5462	0.5277	0.3823	0	0.6015	0.3141	3.1979	12.7807	0.0554	0.6596	1.3176	2.7881	1.2578	0.6109	12.613	15.9125	2.816	1.5124	1.6221	6.9347	0.5642	5.6233	4.7179	3.594	2.3908	3.1989	16.0227	34.179	0.1825	29.3322	76.0722	44.1636	0.1733	0.5301	7.345	5.2711	7.3442	2.4923	22.9801	10.7671	1.4351	10.392	1.8778	0.053	23.9901	13.1749	19.602	17.4748	3.8298
057daf8b-fed8-45c7-a25a-27218a88cffb	0.3814	1.7086	2.8688	0.0383	0.3509	1.2668	0.5686	20.8684	0.1194	0.4238	0.8219	2.4666	0	0.6624	12.8415	32.8516	0.0397	4.2845	0.2099	20.4912	1.346	3.9017	15.4489	6.3093	0.898	2.4995	39.7298	34.2428	0.4989	19.2958	14.7793	5.0114	0.1395	0.074	9.7433	5.5721	14.6428	3.0757	117.199	6.3681	1.7844	19.8431	3.6779	0.713	32.5443	0.7644	27.0791	15.3502	0.7708
b4cc5c0d-e888-467e-8b15-5be5fdeebdc9	0.4504	1.1087	0.0987	0.0703	0.1755	0.2745	0.8242	19.2216	0.0273	0.538	1.2457	6.0261	0	0.2457	2.3397	17.1647	0.2722	0.8277	2.612	4.3682	1.9305	4.7677	10.986	4.8977	1.7264	2.8736	2.7782	38.4418	0.17	13.9218	2.8456	11.8399	0.4717	1.6906	11.9418	7.4662	20.0481	3.4413	35.8549	10.1779	0.4881	9.2634	2.539	0.8953	17.4222	0.0873	53.6104	7.4014	2.1268
53ecfda7-66bf-4040-ae72-47d5330f9b48	0.152	0.5185	0.7619	0.0604	0.9718	0	1.9253	3.2578	0.0414	0.5749	0.1636	0.4445	0	0	6.6861	36.4425	1.1636	0.6426	0.1446	1.9821	0.1871	1.1207	1.1063	2.0236	0.0786	3.9548	0.7688	107.738	0.1107	6.2996	14.4293	40.7732	0.0785	0.0097	0.5231	1.8933	3.5139	1.5044	6.0238	6.9234	1.6867	1.5847	0.101	0.4753	15.1826	0	15.4138	5.9282	0.8095
51170677-46ff-4ce7-babf-e5151d1af528	1.4498	0.7224	6.6534	0.0436	1.8888	6.0036	1.4807	11.6867	1.9203	0.6786	2.1101	6.1878	1.975	16.7191	15.4651	41.4807	4.7591	4.783	0.3582	23.0612	2.6577	8.7972	9.4733	12.035	2.6037	8.6281	22.3665	96.9477	1.3375	29.7765	32.6062	9.7135	0.0605	6.2573	11.2381	0.4542	11.259	22.6531	77.9392	24.3538	1.7998	9.5722	3.2147	0.3328	46.8442	0.2783	18.0809	21.5541	0.3898
acc574a5-4c54-42b7-a60a-45017c7766a5	0.3004	2.587	1.5534	0	0.898	0.2919	0.9785	44.5012	0	0.9339	0.6046	3.2178	0	2.0904	6.0287	27.4902	0.0394	3.5441	0.1951	0.7032	0.0491	0.775	16.6611	15.7709	0.4701	1.9849	27.0713	31.1514	0.3363	33.5618	3.4838	10.935	0.0741	0.0459	5.1523	0.0722	13.2179	3.321	103.884	6.4555	0.5022	5.0305	3.7815	0	26.7558	0.0948	25.7361	17.9561	0.7735
b7702969-1700-48d3-a296-826bab641154	1.1568	1.7818	2.2315	0.0065	1.6086	7.8446	2.1538	20.9169	0.5592	0.478	1.198	8.619	7.929	6.3577	17.3568	19.687	0.6342	2.2281	4.6335	10.1685	2.6189	16.0617	13.5549	4.9652	2.8631	4.7853	16.5338	73.1887	1.3309	20.7139	17.5032	3.0806	0.8903	3.5089	16.9686	5.8534	15.3921	30.8188	67.9417	15.8916	1.077	10.118	2.7904	0.7053	40.3897	0.6932	36.9139	10.5064	3.0552
af1598cb-dea5-45dd-861b-8c0df85f8951	1.0394	9.4629	4.7213	0.0462	2.0212	7.0877	3.072	12.7991	1.5445	0.2272	2.441	12.1379	0	12.643	17.4381	29.4189	0.3066	2.3764	0	41.9078	1.8629	9.6755	6.0483	6.4472	2.6968	10.1401	12.2547	205.69	0.4442	35.4643	17.8323	6.5844	0.0962	5.951	13.2617	8.9509	11.3922	46.8066	53.469	20.1693	1.4431	5.7373	2.7359	0	39.1896	0.1476	24.4795	12.8567	0.8857
01d0e31b-3978-4208-b963-bbaffe938aa7	0.4081	0.0944	0.8146	0.0645	0.6291	1.1707	0.8291	8.0294	0.2574	0.7137	0.6389	1.3034	2.1926	3.8036	9.2481	21.6522	10.1792	4.8769	2.872	6.4093	0.6168	12.635	0.3639	2.1461	2.0167	1.5741	25.6333	30.7875	0.1387	25.3577	40.2315	15.2204	0.1679	1.2253	1.427	1.779	12.1966	9.5251	5.664	13.1837	0.4061	2.5028	0.7843	0.4619	14.9722	0.4377	2.7076	15.8998	0.6182
9ae6e738-0411-4974-925a-8eee9eebdb47	0.154	0.571	0.1651	0.2672	0.5344	1.8764	1.4206	25.8802	0.2972	2.4755	0.659	1.0725	2.7936	4.0708	19.2569	37.9633	3.7493	7.1283	7.9938	8.0775	0.7009	8.0028	2.7356	5.0276	3.5972	5.0528	26.512	89.7651	0.4262	33.5232	29.817	5.2466	0.2139	0.4763	2.4815	4.658	11.8907	11.9229	15.6531	20.8541	0.4347	4.8076	1.6509	0.2354	61.2628	14.1392	6.3641	14.1976	4.0169
7bb80284-9ca7-48de-9d04-a5b0b6a15b68	0.5582	0.3788	5.5446	0.013	2.4185	3.957	2.9268	7.4719	0.9754	0.8915	2.1619	4.7966	0	9.6102	9.148	16.6061	0.3222	2.753	0.6031	10.5577	1.6598	6.8801	2.9805	2.3625	3.3465	4.8696	13.2314	66.5661	0.7206	32.5961	54.4729	32.3889	0.027	4.4774	7.0142	4.319	10.9024	15.2627	19.6102	12.2006	1.0174	6.7089	2.1082	0.3709	27.367	0.2894	15.7057	14.2137	2.3826
52ead51d-c3eb-4915-8c87-773c06b31779	1.3856	0.1403	4.7891	0.064	1.4549	7.2238	1.6576	19.7113	0.3429	1.1004	2.9249	9.3388	0	5.3282	11.5394	34.1966	8.9091	4.0731	0.2628	17.474	2.9245	21.5556	6.8533	3.2936	3.6312	9.0587	15.7763	178.731	0.8248	49.7131	37.0954	25.0075	0.1664	2.4701	15.9785	16.1466	11.6545	29.5645	38.2822	32.446	1.6907	13.8151	1.6898	1.1903	45.8031	1.1484	20.96	10.0848	1.7156
235b04f8-cfb4-49ab-93c0-e9dd4cbe4e46	0.9895	0.8031	2.303	0.0422	1.7225	3.511	6.9632	13.7871	1.0956	1.2981	2.2111	7.9292	0	7.7036	16.4345	34.5584	15.992	5.1544	0.0579	18.7421	0.8077	39.1289	1.0008	2.3117	2.4208	8.1493	17.8683	210.817	0.4273	43.533	181.348	30.9541	0.1758	3.3178	7.5503	13.1702	7.6768	32.2767	17.299	26.7737	0.8509	7.6892	1.2651	1.2097	39.4004	0.7418	13.2042	12.104	1.7809
2674a752-7508-4135-a3c0-0190af6bc28d	0.0652	1.2411	0.1437	0	2.2198	2.1986	5.462	16.9243	2.7062	2.6335	1.3252	6.956	0	21.4344	50.3568	22.1954	0.1846	5.3382	4.7638	9.7532	1.1071	2.7872	10.0447	9.4645	1.3336	6.7676	7.9079	109.085	0.6333	37.2828	3.3265	3.6696	0.0869	1.3793	11.0942	18.3165	17.1169	11.567	47.7005	14.5034	0.7286	10.8435	1.3137	0.239	80.0613	0.3998	44.5339	11.5255	1.0664
134d5e37-f09a-4b4f-8525-d1a9bb892d16	0.1884	6.0273	5.4996	0.0503	0.6633	1.7945	2.4498	11.7092	4.0277	0.7619	0.9164	1.6499	9.1099	11.4309	6.6941	45.7148	0.0834	3.6963	1.9964	8.1277	1.6276	5.4306	5.7078	4.2785	1.8329	2.3448	3.4774	83.9981	0.3178	35.9561	4.6886	9.7833	0.2092	0.275	8.6229	2.8517	6.0718	7.6372	27.812	13.7808	3.3832	6.0191	1.2928	0.3838	53.9442	0.2674	21.0927	8.7477	3.0821
214efa45-5afd-4e99-a9df-1f6588a9a7c3	0.0056	0.9224	3.7288	0.0238	2.0254	1.0448	2.7526	11.2204	1.0803	0.117	0.6173	1.8631	3.2354	3.4798	12.0713	13.972	16.4513	1.6438	2.5101	13.033	0.6273	14.9474	4.2423	3.2689	1.3639	2.4038	16.94	33.0621	0.1505	27.7027	2.134	33.4033	0.0991	0.9193	7.5121	7.162	8.3026	3.2672	12.8046	7.9134	1.714	6.3208	1.5262	0.2726	15.5074	0.5319	10.8838	13.5488	0.8666
18a7b399-dbb9-46ba-8fcb-9ca06a80cd36	0.8981	1.1894	0.4534	0.0232	4.1196	4.5699	1.0297	21.3347	0.4172	0.6284	0.6574	1.6234	0	1.5343	5.828	7.1465	0.1349	3.4862	2.6098	5.1298	2.8218	3.6876	20.08	6.0589	2.8327	1.3536	18.6856	39.8109	0.9638	21.701	11.9959	2.6057	0.5804	1.9971	19.6273	7.2244	13.4452	1.9861	62.3165	4.5068	1.1117	21.7722	2.3907	0.9982	6.7405	0.0185	36.014	28.3544	0.8015
ad727ebe-3cd4-438e-9851-f48925496cd5	0.3906	1.1186	0.1898	0	1.4579	1.0567	4.794	11.2226	0.0103	1.2367	2.2746	4.4779	4.6838	0.195	17.978	10.3611	0.2972	1.6552	3.1147	6.9162	0.6196	10.1601	7.6495	4.5992	1.6945	2.8256	11.7849	23.1159	0.5507	46.8924	38.9821	33.3101	0.1578	0.9716	10.0429	6.3435	8.6078	3.3912	35.1827	14.2244	2.332	19.7319	2.3357	0.5131	24.0178	5.5772	23.1752	18.0061	4.4106
8e5575ad-3be4-46f9-a12b-c45db5fd677f	1.0668	1.257	1.1787	0.1005	0.7652	2.8878	1.474	13.0271	0.0612	0.6586	2.4108	5.6187	0	2.2813	14.7474	15.0756	2.8234	2.2015	2.6297	10.494	1.4882	14.8498	9.7719	5.869	4.3033	5.5482	20.209	54.731	0.7227	39.2515	25.7192	104.026	0.2323	2.3643	13.4788	5.448	10.4926	9.512	42.409	18.9435	1.2592	15.9215	1.9193	1.1508	33.8493	1.087	31.7253	14.2444	4.2354
4d4134d3-87a8-449a-a6e4-587f1cfebdac	0.8026	4.6593	9.5329	0.2305	1.7525	3.7765	4.5194	21.37	2.2037	0.5172	2.3338	3.4744	4.0858	8.3164	15.5478	25.1509	6.9293	2.8524	1.729	31.3421	1.781	11.637	11.3476	5.6762	2.5262	6.6018	35.7789	73.2985	0.4713	25.028	4.6277	17.5657	0.3962	3.283	14.6132	10.1712	18.9606	13.8051	51.6032	16.4821	1.7861	18.4039	4.6314	0.746	43.6157	0.6237	19.7758	24.9531	0.4992
f95178e5-2a8a-47bb-8d2c-81a43aed448b	0.0126	1.178	2.9584	0.0537	2.4752	2.5458	1.3801	21.2435	0.067	0.396	1.7472	6.5087	0	14.9423	10.1467	23.882	0.1336	4.2239	0.2942	12.4616	2.0812	12.6314	8.905	19.3602	2.238	6.2764	17.9085	72.2456	0.3531	26.8365	56.9019	26.0554	0.1118	4.8052	9.2126	0.5363	12.5067	23.0877	69.681	16.6451	1.4873	6.6337	3.1597	0.3076	34.6879	0.6429	26.8869	10.3663	1.029
9d836659-e290-4424-bc0a-c2205355367b	0.1561	0.7679	0.8808	0.1313	0.7638	0.7565	1.0022	3.9613	1.0727	0.5957	0.2762	1.0369	2.7452	0.381	7.4258	7.6013	0.1256	0.9299	0.5532	2.7401	0.9392	4.1594	1.8681	1.5385	2.1252	0.9549	2.2673	7.7406	0.1685	10.0635	4.3348	17.4898	0.1051	0.1365	1.1227	1.7889	4.8722	0.4708	9.0453	3.4272	0.8339	3.4228	0.8112	0.0578	11.8963	0.4997	5.3188	3.0467	1.0062
dddbb4fe-4c79-4f38-9105-1caf7678e971	0.0983	0.3324	2.1473	0.0699	0.5373	0.4708	1.9524	37.9858	0.8198	0.3868	1.0553	2.2664	0	3.5184	6.1967	24.6304	0.2755	1.6638	0	24.7031	0.253	10.3903	13.8072	20.2997	0.4372	3.6243	28.7427	81.9502	0.3361	21.2085	11.4966	10.2841	0.0364	0.2139	9.0513	4.6919	16.1064	4.2569	68.5041	13.625	1.127	3.986	4.7806	0.6009	28.1292	0	23.1261	11.5745	0.9382
9ed0c44a-f621-4b68-97ce-e9dd91b13e19	0	0.5206	0.9572	0	0.6371	0.381	1.8927	16.6634	0.0355	1.0501	1.0455	3.2358	0	0.3198	15.3233	21.3913	0.059	1.4751	0.2507	1.1061	0.3889	0.8012	14.6626	22.7639	4.4929	9.1866	11.5783	22.6564	0.2932	52.6598	1.5474	5.9819	0.0635	0.1375	6.967	5.6526	23.7505	0.5005	79.2553	2.1486	0.7068	9.8689	3.7697	10.4848	34.5388	1.4124	51.7165	7.289	3.508
13ef9249-7f76-4e49-a122-07df68c278b7	0.2008	0.3628	2.7181	0.1128	1.2795	5.2276	1.1993	26.9907	0.6637	1.3861	1.7017	6.2648	0	5.6023	7.5191	27.5157	4.7134	2.9251	0.4325	14.5484	0.6294	5.0769	6.4118	9.5836	2.538	3.7026	31.6758	73.9167	1.1865	40.8904	8.5793	46.5422	0.1878	3.63	11.7835	7.3647	23.8387	14.0784	44.0795	22.5749	2.4988	6.4339	3.5602	1.8085	37.0401	0.036	26.3718	24.4441	0.778
813798a6-fbf5-442a-829c-7f7eb5062dbf	0.7336	0.5534	4.8227	0	3.5781	1.8636	7.2625	15.9603	0.8006	1.2832	1.5876	4.5473	0	6.2365	6.6506	28.9779	1.7964	1.9828	0.0715	12.2396	1.4565	11.3382	4.7402	7.8692	0.2719	2.5273	8.1741	134.677	0.7195	31.8454	8.793	16.2894	0.516	2.1506	5.5696	0.136	27.3669	10.1057	42.7237	18.2135	1.3274	7.6631	4.0553	0.0747	40.1821	0.7083	40.9022	6.8532	3.0508
89e9e5fd-875b-4574-81f8-016eb83d32d1	1.2022	2.3191	3.3589	0.0288	0.8349	2.9027	1.597	31.4623	0.4242	0.7442	1.917	5.8245	5.8791	2.493	9.8529	25.8813	4.1006	2.4228	0.079	27.385	1.0131	11.1306	8.1641	10.5498	1.8625	4.4716	41.413	79.2136	0.5834	27.7583	11.6726	47.8058	0.27	3.4061	14.5811	6.8983	12.3765	9.1107	42.9781	9.5864	1.5681	8.9992	3.2915	0.4128	25.5089	0.4372	21.9884	19.7221	0.663
f5bbc13e-b623-4367-bb4d-2a11e361bc6c	0.2121	0.3812	0.4094	0	0.2432	0.6424	0.2067	17.1868	0.1437	0.7757	0.5564	1.7784	3.7299	3.5803	7.7218	20.7256	0.8192	3.5059	0.0752	8.4063	0.2694	15.2864	1.4858	4.2691	0.8577	2.1069	22.2119	62.0434	0.1665	18.6199	9.0208	30.4586	0	0.4328	1.509	1.4416	6.1613	5.2945	12.1773	7.3648	0.3593	2.0796	1.2181	0.0786	19.1327	0.1971	3.375	11.4384	1.7352
4058da17-e1bc-421d-aed0-e274a1de309a	0.0494	0.5307	0.1008	0	0.083	0.0206	0.721	9.5125	0.0029	0.4748	0.276	0.8966	0.7956	0.2208	2.954	7.7911	0.034	0.3683	0.0641	1.9097	0.2541	0.4216	2.6015	2.7256	0.2195	0.7749	0.4365	26.7095	0.0355	7.3104	38.8021	8.2555	0.0487	0.0188	1.0216	1.0623	3.7777	2.1374	18.7549	1.8041	0.5305	1.4321	0.7465	0.067	9.9384	0.0561	20.2595	1.1877	0.3813
44f36689-d1f0-49e8-a34d-5adecf1bd738	2.525	0.7824	1.2281	0.3963	9.5783	1.7628	3.6876	17.3105	5.7024	0.2436	2.8404	2.7352	0	0.8722	3.6031	11.2984	4.0751	3.0715	14.7093	22.1911	1.9864	5.3522	23.7389	12.289	1.9819	3.9874	21.3431	45.5688	2.4856	19.1191	0.2153	6.0369	1.1135	3.3421	11.6077	12.9574	28.8898	14.2159	104.552	25.3913	1.3571	28.4039	17.9005	0.3405	26.7931	3.2896	18.0645	25.3	0.8354
39f3c070-92e1-44ca-bd4e-734951ea866c	0.5172	0.6919	0.9309	0.0225	0.6923	0.4879	1.3576	14.8539	0.191	1.4676	1.9228	1.9152	0	0.6021	6.8835	14.4086	0.4577	1.2793	1.9439	1.589	0.7916	6.8206	5.515	4.3512	14.3888	1.7981	7.6159	26.021	0.8148	42.1597	1.4691	6.0534	0.2344	0.6019	3.2725	9.6942	8.7528	0.6419	37.5597	10.1042	0.4765	4.6922	1.8812	1.1613	26.1146	0.3237	15.9093	8.5611	2.0291
b8a15bab-7f54-48ef-9a53-6c6440320e69	0.0101	4.9034	0.6435	0	2.3828	1.729	2.3122	59.178	0.1667	0.9806	3.0299	6.5519	2.9311	0.3729	8.0086	43.7584	0.1341	1.1583	0.1181	13.0147	0.4123	9.78	17.1246	6.27	0.6515	6.5739	14.0069	161.245	0.4853	29.3424	4.1596	1.4294	0.1795	1.9434	11.7294	7.5183	14.0075	43.282	86.9419	34.2401	1.6396	12.6623	2.0285	0.9262	72.1694	0.0172	20.906	8.4152	0.8264
23f73021-f645-42d2-a7a6-73ac5253b4b3	0.4413	0.8992	1.8017	0.0131	1.0204	1.3476	0.9043	13.671	0.5546	1.0291	1.0857	3.8098	5.3349	4.2365	3.997	14.8518	0.2278	4.5074	11.467	3.9162	2.7986	4.9176	11.3043	4.211	1.0086	4.3644	5.6363	44.4204	0.7212	19.5847	13.862	3.5058	0.7624	0.8085	9.462	9.1907	7.897	10.1647	51.4544	6.9319	0.3953	15.9419	5.9459	0.5994	18.9441	0.1253	26.6163	8.282	2.1057
651885e8-5c08-40b1-87f9-016c5d2bc05e	0.3111	1.6928	8.435	0	3.7862	0.0525	2.2744	25.5591	0.0134	0.5294	0.5755	2.8399	1.2198	2.0596	5.5889	27.368	0.0967	1.6664	0.2704	7.4695	2.7451	5.5344	8.3412	8.4538	0.6171	3.788	3.9554	73.0354	0.1407	26.4021	346.452	24.529	0.0747	0.0404	8.4536	0.265	9.5405	3.6721	51.6286	4.9414	2.1148	4.9696	1.701	0.0514	41.6267	0.1289	34.8785	6.0834	1.7539
16dc7ba3-504b-4fa1-8c04-78c1e9678de9	0.1634	0.2884	4.6133	0	1.0577	1.0831	2.0835	12.7007	0	0.5966	1.3875	4.4173	2.0618	1.6691	16.1358	29.0711	0.088	0.873	0.2077	19.1263	1.0346	10.2083	2.1902	2.4412	1.1062	2.7998	35.377	86.2285	0.4296	17.5447	2.6375	10.6113	0.1894	0.7714	3.9168	0.0395	20.9737	16.7745	18.0125	11.8194	1.8179	4.2543	1.9025	0.2606	41.2556	0.1211	12.028	11.0204	0.2907
459d88a6-447d-4a66-afa4-4a5c100870ef	0.2211	1.5689	8.4879	0.0429	3.6179	0.4019	24.1362	30.6517	3.2961	0.9846	0.2698	1.1077	3.8889	2.2038	20.9681	21.6237	0.083	2.5137	1.2539	17.976	0.4731	8.5325	4.5828	3.8985	1.2221	2.0993	16.6757	51.5151	0.4486	33.7935	13.0587	51.1261	0.1489	0.2486	4.0017	4.0745	8.0673	4.7793	21.0729	3.3192	2.3771	3.3463	1.643	0.3277	46.1206	0.0457	11.5504	21.8191	1.535
ea43f199-daca-48c9-941c-d8af399e2709	0	0.063	1.1503	0	0.1019	0.2649	0.4393	29.6284	0.2311	1.6689	0.3659	1.3424	0	0.5421	3.9858	25.139	0.0268	0.9014	0.059	8.4828	0.1336	9.1933	2.4313	5.6427	0.4042	2.0136	16.6611	83.0518	0.1308	24.4172	11.1261	31.0075	0.0224	0.2359	2.3061	0.4305	13.0105	3.9075	14.022	11.1965	1.0962	1.492	1.8984	1.111	17.4327	0.0172	8.8887	11.8756	0.1239
f3c2f1c2-7ccb-4cde-840c-888c1a062858	1.2808	4.8342	3.7488	0.092	6.3924	0.4462	2.4694	39.7991	1.8093	0.4362	0.8677	3.0534	3.5734	3.9673	24.2543	36.6149	0.0327	1.6239	0.18	3.0785	0.7811	16.1687	22.1967	31.549	0.7806	1.8594	11.4731	101.603	1.2665	24.6158	7.9637	1.6407	0.1778	1.8615	17.0181	7.8816	21.2363	4.783	94.5825	6.4413	1.2113	8.6519	2.899	0.9786	45.8541	0.1259	51.4116	18.4505	2.5187
eae662fc-ac62-4d3e-adbe-d8f7dafaac03	0.055	0.1144	0.4712	0	0.4852	0.0687	1.2821	76.1183	0.0195	0.4806	1.2353	2.995	0	1.2909	8.126	38.5091	0.1621	1.5153	0.2678	11.053	0.2223	2.6845	21.8347	23.0339	0.5296	2.2038	28.3159	69.8063	0.3066	29.918	1.2749	22.8331	0	0.214	4.4644	0.1698	17.3153	2.8863	112.986	12.1203	0.7089	6.7439	6.0619	0.4479	27.2214	0	27.2167	20.8025	1.2738
646acf23-d998-46bc-a5cc-998c7cff6924	1.6649	0.4331	2.6555	0.0185	1.1813	2.5567	1.8536	25.0789	0.1108	0.5915	1.7979	6.7303	0	4.1319	9.0669	49.5606	11.9571	3.3237	0.3042	13.5138	0.7269	29.4144	6.9323	6.0376	1.5428	6.3292	30.6876	193.216	0.5149	39.5366	11.5668	31.1981	0.1156	1.0843	9.3604	9.6444	7.2299	21.8605	44.3219	23.2698	0.8016	9.7426	2.713	0.318	44.439	0.4432	20.892	16.7261	1.135
2276c28c-bc2c-4b46-a3bc-8e0bfd230435	0.2821	0.08	3.7902	0	1.8544	7.6459	0.9863	24.7202	0	0.2691	1.9615	7.0026	2.4801	2.5814	17.7052	27.7664	0.0756	5.1243	0.1499	18.134	2.3192	1.2731	3.8282	6.9692	2.4332	4.61	50.475	77.5328	0.1107	37.9975	151.291	44.2365	0.1519	13.3779	12.8037	4.468	10.1753	30.7624	24.6364	20.915	1.029	5.2916	4.3584	1.2539	42.745	0.1747	27.1936	53.3433	1.3985
9c26acca-6c08-4d28-8f97-96b33d756d34	0.0226	1.9462	1.6935	0	0.114	0.508	1.0597	7.9161	0.4617	2.2758	1.1732	3.1819	0	2.8502	15.0904	49.6363	0.008	2.0721	0	24.3728	0.1595	5.6655	12.5977	7.0363	1.5272	2.6847	10.643	80.0774	0.1854	23.3667	1.2053	35.5967	0.0803	0.1614	2.4672	0.0754	14.4228	3.9464	37.8517	13.1257	1.9328	3.1768	1.794	0.2762	40.9052	0.0462	15.3226	6.8235	3.8807
31f02a50-fe5b-4193-b945-96b9fa26ded2	0.1816	0.168	4.0701	0.1867	3.784	4.7226	2.0993	17.2282	0.7232	0.9529	2.8027	11.0935	3.9033	10.9241	23.5317	26.624	0.4048	5.4977	0.2753	13.9762	4.0359	6.3018	6.1221	5.515	1.8549	8.3414	6.5664	151.348	0.7698	26.9605	331.804	72.1116	0.1195	7.6159	20.2882	0.8852	11.1559	51.0922	44.6381	12.9777	1.0122	6.9744	2.5292	0.1645	25.7241	0.0229	38.4353	14.0759	1.8708
79551526-ab6b-4ceb-a0bb-eb81573ddd11	0.3116	4.4141	0.7516	0.1535	2.467	0.8384	0.6801	15.3139	0.4389	0.8552	1.0228	3.221	0	3.4423	6.2145	38.4703	0.1018	3.5255	0.1121	7.5365	1.7236	12.1375	9.488	5.7748	0.5544	4.1334	2.9842	104.124	0.3985	15.5542	42.6455	13.999	0.4046	1.2713	4.3059	4.6205	13.1654	3.8691	53.2861	11.9421	1.453	10.5027	1.0166	1.3478	29.7025	0.1143	52.3555	9.4094	5.7253
039a08ac-3493-45b3-80a6-82be78c018cf	0.7932	0.8791	2.9852	0	0.7395	0.6463	4.3707	23.6604	0.1224	1.1461	1.2033	2.7468	1.6677	0.6172	7.8158	16.8568	0.1119	2.1089	0.1344	6.6189	0.8749	8.3676	5.7852	9.5835	1.3038	1.8284	4.31	49.6748	0.4034	16.8454	181.269	7.5967	0.1532	0.1343	5.6616	0.9269	9.3281	2.3832	45.555	8.243	0.9391	7.6584	1.6685	0.5621	20.3395	0.1175	19.6	5.8463	1.7397
cfbc5655-64b8-4adf-85b2-3176defb6c42	3.2831	0.4045	0.1482	0	0.1526	2.0077	2.3861	29.8511	0.0368	0.408	2.1566	3.5702	0	0	10.8247	12.9234	0.4435	4.2032	4.8496	4.3492	0.7814	16.4386	5.7836	4.9075	3.6123	4.4366	29.9034	38.1418	0.3731	60.9637	52.6122	60.8161	0.6141	0.8429	8.8412	5.8937	9.014	4.06	71.9705	23.2488	2.0989	15.4961	8.642	0.4225	32.2613	0.5593	23.8582	29.602	3.958
bbc57772-6462-4efb-9bf3-e7af4b4852b4	0.079	0.1569	0.9498	0	0.2717	0.287	2.4444	22.2785	0.0306	0.7911	1.2573	2.4249	0	0.3854	29.6281	36.5454	0.3177	1.7051	0.5037	11.8482	0.491	3.3114	4.1489	5.2617	2.9378	3.4431	35.0941	56.9219	0.3875	29.0416	10.1591	7.7379	0.2233	0.3157	5.3129	0.9848	16.4846	2.6989	35.9413	18.6814	1.9138	5.0481	2.3541	0.4388	27.0464	0.2691	20.6229	23.852	1.5857
93e4a0a2-5bd8-4e50-a90d-e2ae88669aba	0.0249	0.9079	3.6239	0	1.2788	3.966	1.3519	26.2562	0.4601	0.2616	2.961	3.5236	2.4113	6.4138	18.0366	30.0355	0.7502	2.668	2.4295	17.3823	1.9066	3.0345	9.7651	12.5619	2.2547	3.9184	33.7154	90.3475	1.0767	28.3467	99.5711	38.1298	0.3692	4.2937	11.1335	6.7625	23.1574	15.8502	90.2172	9.215	1.5186	9.612	4.3624	0.7112	34.83	0.3398	30.6485	33.919	1.9035
243b00db-d908-46ff-94fb-4c018b519abe	0.2261	0.1051	1.2964	0.0103	1.7962	0.3486	5.1598	3.2498	0.041	0.4039	1.4526	1.6941	0	1.9049	11.2988	12.4854	0.0681	1.576	0	2.7976	0.1698	4.5766	0.6024	1.5646	0.214	3.3715	0.9614	34.6566	0.0831	14.4993	15.0102	103.067	0.0641	0.1719	2.3939	0.1427	4.6545	2.2075	2.0605	5.1923	1.0549	2.3777	1.4906	0	9.944	0	8.7077	3.6368	0.6297
a2457e84-5cb8-46f3-b000-d38159a8bf71	0.0326	4.3017	0.7266	0.0077	0.9399	0.9309	1.4231	29.1424	0	1.4045	2.3736	4.003	0	1.942	5.1524	26.2086	2.5546	1.333	0.148	11.2237	0.3271	9.9926	30.3438	17.9599	1.0135	4.9354	6.0515	89.6494	0.6053	23.7625	16.4038	7.0674	0.0964	0.3678	12.1007	0.2078	14.2721	4.1792	94.8945	31.6318	0.4899	8.1368	2.2959	2.7415	25.6852	0.2095	52.3308	7.3874	5.9178
3e3fd4dd-1a2c-49ca-bb92-b91e33ecc3f1	1.1631	2.4927	1.85	0.3335	2.4525	5.7256	7.8154	18.9953	2.1993	2.004	1.1881	6.269	0	4.9515	9.1101	28.2343	0.5224	3.7677	5.1766	12.0305	2.2786	11.8856	5.1415	5.6061	3.7449	5.3401	15.4891	72.1568	1.2932	30.917	113.967	45.1308	1.0026	2.8506	7.8411	5.0521	15.0543	10.8928	31.1445	19.0573	1.3995	12.273	4.4389	1.6978	32.2866	0.8281	20.8586	16.8127	1.3491
99d87ee6-32a4-434a-b0d7-e69d0c74c142	1.5068	2.1577	1.6934	0.0156	0.7473	1.1697	0.4635	35.4894	0.7943	1.6696	2.6062	2.1421	0	0.7609	6.2624	45.1421	0.259	3.0433	2.4164	9.6843	1.0004	26.4812	19.304	6.6509	2.554	9.1716	27.3476	105.911	0.5607	32.7646	6.9146	2.9179	0.1625	0.7589	11.9276	7.0031	12.2298	5.4794	54.9451	40.3658	0.5818	5.4229	3.7077	1.699	56.472	0.2492	23.791	13.4681	2.214
f5f63b6b-a693-460f-a25c-69e3b0944a8e	1.0106	7.2401	2.3541	0.0354	1.6927	6.6854	2.131	17.7784	0.5997	0.3912	2.0344	8.8403	0	14.7879	15.7808	44.1696	0.3372	3.6364	0.1937	30.8454	2.339	21.0144	11.0503	15.5573	1.4001	6.1798	38.4128	135.452	0.5813	48.4025	63.7023	25.0642	0.0736	8.7761	12.2182	13.4203	19.0206	19.6921	67.2835	30.1898	2.4575	13.7598	4.2612	0.7089	40.9916	0.1694	19.6506	23.8394	0.6099
8bba1103-8b79-4013-8a93-48f4b8839d3d	0.2061	0.0938	1.2096	0	0.9315	3.2075	1.1045	25.7095	0.3611	1.8473	3.3014	6.5873	1.2457	1.4983	4.149	18.9011	0.4104	3.3896	0.1757	16.3322	0.8619	6.7866	12.2402	9.5381	1.986	5.5531	12.4677	106.79	1.1264	38.502	3.9341	12.7449	0.1144	2.2595	17.0256	8.1096	14.7585	14.075	83.4795	18.8526	0.5261	11.5395	4.0619	0.7348	31.6331	0.5705	32.2779	10.3428	2.4234
9ab8e15f-8382-4e56-af5a-f34c966f8153	0.3705	1.0338	0.7701	0	0.3115	0.0561	0.9132	43.7266	0.2689	0.3535	0.5311	1.654	0	0.8288	4.1427	16.1818	0.7055	0.5241	1.1159	5.8191	0.7925	1.9419	11.8406	4.9112	1.548	1.2871	3.018	40.0689	0.2848	20.6339	6.511	17.2045	0.0249	0.6711	11.3738	7.419	15.6924	2.6689	56.8553	7.76	1.5205	6.6214	3.9515	0.4117	11.416	0.3634	44.1446	11.6562	1.1939
9c0122db-33a6-4fb7-873e-12838fc7f8f0	0.2935	1.0019	5.4143	0.0587	1.7582	2.6121	1.4398	10.3892	0.5858	0.7218	1.403	2.4714	0	4.185	10.7629	14.1961	0.422	2.2982	0.1072	19.7927	1.0115	11.7641	4.2397	4.3266	2.121	4.2203	17.8726	52.0647	0.5148	23.0087	44.3548	14.4672	0	1.2475	7.5587	4.0287	10.2217	5.8809	28.5157	9.2875	1.5377	4.439	2.6897	0.4484	28.8262	0.0937	17.5051	13.0617	1.8755
9c5e10db-2868-4af7-bed7-3fd2a079b9b8	0.1705	2.2178	1.8102	0.0243	0.3585	1.2782	0.5376	17.318	0.1694	0.507	1.2814	3.0635	1.6492	0.9918	11.6383	24.6018	0.4829	1.1544	0.2991	5.6047	0.0502	11.3058	5.8303	10.0757	4.4242	4.5799	15.1989	41.3203	0.2761	24.7072	1.3185	22.9816	0.1263	0.2031	3.9452	4.9624	11.0236	4.6505	58.0277	13.9078	1.0875	5.9804	2.5391	0.8338	37.3843	0.0968	15.4143	5.9012	3.6733
6c3a4e3b-869d-4c0d-af52-932a177dd60e	0.5866	0.591	0.4639	0.0634	1.6203	0.2505	1.0183	26.3078	0.2332	0.3896	0.7324	3.0817	0	1.2458	5.4651	18.1716	3.989	2.5177	1.6498	2.7052	0.9173	5.4941	8.7968	6.0713	2.3119	1.8945	6.1852	31.8829	0.5211	18.6875	16.7945	25.988	0.1649	0.6326	5.5708	6.8132	12.5473	1.1494	65.6174	6.9438	1.0456	10.2058	3.1775	0.3631	20.5116	0.5187	33.004	11.1724	2.369
34d18f65-8968-47f7-a5da-b8fc26c2bcf5	0.3074	2.611	0.7356	0.0305	1.4248	3.5369	3.8677	10.0613	0.8905	1.2754	1.0506	5.9598	0	4.0783	14.148	18.9122	0.3796	4.6841	5.0579	7.4604	1.4194	13.4305	8.2286	4.8794	2.6711	7.7116	11.6069	40.7463	0.5017	33.6299	11.8579	7.3827	0.6352	2.8489	11.5117	9.409	8.3831	3.5176	33.3226	38.2105	0.8607	37.1376	2.1829	0.437	38.1695	0.2436	21.9057	8.0488	0.7603
1d986e93-94bf-41b6-8cae-14d38d1f484e	0.4888	0.2146	2.3765	0.0245	0.607	0.7634	1.3004	46.9486	0.0081	0.521	1.7528	4.556	0	0.9227	8.7478	32.5123	0.2636	2.7838	0.1786	11.6313	0.615	17.1199	8.6075	9.2018	0.7984	4.7116	3.8297	224.419	0.2804	29.405	4.7398	21.7888	0.1018	0.9446	10.4377	0.9911	7.7816	13.5337	41.5523	18.3794	0.2791	4.9719	1.011	0.1401	33.8139	0.0911	36.0499	7.2116	0.9685
90b2eecc-f3ee-4ad1-b89e-74691079b20e	0.0216	0.7294	2.3852	0.0092	0.7205	4.7464	1.2851	22.1666	1.0365	0.7266	1.9599	7.541	0	3.1073	7.5464	39.1265	0.0843	3.2249	0.1518	12.7608	0.1432	9.3556	14.212	13.5971	4.2727	11.1447	37.2919	133.622	0.6914	32.2641	7.3277	14.0567	0.1922	6.1363	16.1105	0.1364	18.1158	29.4719	65.8207	23.8951	1.6186	12.1374	2.8052	0.7406	40.3934	0.3686	33.2536	18.3073	1.6991
3aee8270-bb98-4850-a484-fc7b398c3445	1.1759	0	2.8641	0	1.2957	3.7148	3.5921	29.5305	0.0216	0.7447	1.1835	3.351	0	2.4491	8.4399	21.8792	0.1675	3.4647	0.1581	33.6294	0.7901	10.1303	10.6096	14.7038	0.8116	2.87	32.7835	69.3142	0.3575	32.9751	2.7434	12.6551	0.0901	0.5479	11.7267	0.0877	18.3795	6.9116	42.3527	10.7908	0.6102	8.419	3.578	0.1652	28.9673	0.1151	15.9058	20.3911	0.3317
b19c86ab-16ae-41d3-a2cd-34e0b64bb23c	1.8588	2.524	3.6163	0.0061	3.2884	5.8956	14.8105	27.1119	0.1287	0.7549	3.5333	13.3792	1.6698	17.2835	12.6311	37.6401	6.932	4.9112	0.3365	17.4939	3.2309	36.1665	9.229	18.4001	2.3421	8.9258	7.2263	168.202	0.7207	56.0739	21.2602	11.9464	0.1534	6.2908	15.6624	6.2779	8.8137	38.5127	60.6023	29.0357	2.4744	11.3041	2.5276	1.2312	50.0217	0.4902	58.5358	8.8364	3.6486
b8b261ea-afc3-48b5-9660-eb2ad1c525f8	0.1487	0.3904	0.5051	0	0.9124	0.4223	1.0166	22.5008	0.036	0.9932	0.7144	1.1174	1.9615	1.6787	20.0276	55.1962	0.0299	2.9289	5.7314	9.8206	1.5808	2.4198	14.4063	13.6872	0.3007	2.811	11.0832	85.375	0.4306	30.1359	22.7788	17.3714	0.03	0.0929	7.5734	15.2443	16.1708	0.5045	64.9925	8.6208	0.9374	8.2412	1.571	0.124	18.4492	0	24.7443	6.9804	1.1337
9c2dbecc-f1db-4b43-88e5-e6898bb9a4b0	0.0128	1.4022	0.8804	0.1781	1.5218	0.2726	0.9104	24.3849	1.3869	0.5051	0.8268	2.2137	0	2.6702	10.8953	16.8087	0.1022	1.0406	0.4127	6.446	0.0425	8.3558	5.7793	5.7028	1.3701	2.2798	6.0834	36.0118	0.2148	22.9766	3.4984	21.5812	0.0855	0.1675	5.7972	2.7122	10.7296	3.4414	43.5424	3.2734	1.0761	3.7603	2.3359	0.6276	19.3472	0.0656	12.6465	9.2758	0.84
566d5a5c-9035-4945-89f1-f1101bff18ff	0.5508	1.1733	5.0011	0.1383	2.8447	1.0039	2.1575	23.485	0.959	0.7481	1.1871	3.5162	3.7607	3.7404	15.9734	27.1475	5.2997	2.1973	0.1895	34.6627	2.2159	12.4547	5.0559	6.6495	1.5277	6.6869	30.3266	73.5157	0.4338	30.7642	4.2846	34.2222	0.2015	2.9921	9.1949	13.238	12.1933	7.882	45.713	24.4328	2.257	10.7812	3.0997	0.7923	50.9277	0.2208	14.8128	16.2007	0.8482
424c3596-43fd-4d5a-ba74-2bdc7341912c	0.6263	0.4032	5.7729	0	0.3654	1.4377	2.1547	25.0099	2.6712	0.5956	1.4656	2.152	0	1.0508	9.1778	23.1897	0.0901	2.2569	0.1602	18.2103	0.0863	4.1751	15.1748	14.2006	1.3406	2.68	12.4332	62.8877	0.1521	21.1486	1.3621	5.0557	0.1565	0.4841	9.0598	2.4017	18.6564	7.9202	68.6084	11.6325	1.4558	5.5646	3.8034	0.1436	29.0269	0.3734	28.4612	10.1917	0.4483
24f595db-d21f-41bf-88c9-0e084fcc97b0	0.3812	1.3599	1.3341	0.0498	0.5888	0.8358	2.0749	19.4333	0.058	0.2449	1.4407	2.7394	2.2572	1.3574	6.0801	12.9406	0.2066	1.682	0.8642	9.4771	0.6006	5.0459	3.5591	4.2049	1.7993	1.8592	6.6453	41.5193	0.336	17.0281	15.0689	38.0598	0.0346	0.6521	5.7769	2.2352	6.9717	4.3008	31.1094	5.8659	0.6021	4.717	1.8371	0.4755	17.4512	0.3181	16.7243	9.3263	1.2728
40f50e4f-9834-4f9f-b6c8-c8b05715eb89	0.843	0.5026	4.3392	0	0.1434	0.8756	1.5229	59.1845	0.0202	1.3916	2.2117	2.2462	0	1.5892	11.8667	29.5929	0.218	2.9633	3.0459	7.315	0.8567	27.0316	19.2947	29.9364	0.969	3.946	9.8162	121.488	0.7056	29.4798	1.9775	9.4959	0.0842	0.7028	6.6468	0.9305	15.2027	4.5032	54.2688	13.6537	0.5091	4.6572	3.5759	0.6947	30.4047	0.1614	45.5809	9.3114	2.8669
f8c97003-66ad-4bd5-a85c-20a5fd918124	0.8351	0.3996	2.1952	0.0195	5.0054	2.8862	0.6572	10.4659	0.013	2.8147	1.0798	10.1959	4.4217	12.5795	4.1002	10.3122	0.1079	3.5445	0.8019	2.564	3.597	2.8994	6.8545	3.937	5.3276	3.4647	2.6466	31.7294	1.5992	17.499	61.0163	6.9003	0.2437	16.2287	11.7753	2.8248	9.186	33.4631	78.7089	4.8667	0.7273	11.1735	2.6314	0.1863	19.611	0.945	31.4995	3.5797	2.7675
d718d93b-84ae-4b17-9a3b-5d6e2ee9fda5	0.2037	1.6505	0.4577	0.008	0.4101	0.4202	1.7353	4.9697	1.7524	0.3922	0.5002	1.3092	2.7106	1.1787	1.8944	11.8867	0.0198	2.1362	1.5731	1.1037	2.5142	11.9484	0.6748	0.7703	0.5817	1.4421	1.0574	45.0987	0.0403	13.3561	6.003	1.3725	0.4897	0.1284	3.4615	0.3879	2.4158	5.2679	6.5326	4.2265	0.7953	2.5799	0.6098	0.0914	14.9676	0.3756	5.875	1.5792	2.1246
3d05e9c9-36ba-445f-a51d-b4091f8d38b4	0.2757	0.6952	0.8703	0.0566	0.9631	0.2782	1.2537	2.3879	0.0395	0.3895	0.5444	2.0005	0	0.2847	7.3641	7.9888	0.5068	0.6774	0.496	4.8507	1.8247	6.2415	3.7281	2.7203	1.9103	1.721	2.5319	14.2076	0.458	21.4818	11.2547	18.0708	0.0942	0.3497	4.9252	1.9756	6.5721	2.1692	19.1875	4.3509	0.6725	5.7681	1.1564	0.3889	13.2329	0.1084	12.3489	3.9912	5.6823
34bd8571-2333-49bc-a72a-3ec0218c0607	1.0165	1.7651	2.2346	0	1.3671	3.3388	1.2224	27.0242	0.0072	0.6535	2.2427	9.3974	3.9065	3.3884	14.6684	31.6367	0.2204	2.9496	0.3149	13.5622	0.5495	5.8057	13.1297	10.407	1.4073	5.2829	13.9652	128.778	1.2682	25.729	10.1896	7.9853	0.2692	2.3773	10.3329	5.5279	18.1134	15.2027	177.56	16.1485	0.9045	6.9373	2.582	0.6584	49.7755	0.3441	26.1785	9.9923	1.9825
6ce73d9b-3037-437d-862a-8f8b87a09fe0	0.1942	2.1018	4.8006	0.0092	1.176	2.9766	2.7678	3.0372	0.2389	0.77	1.3293	2.5435	1.2524	5.3299	8.8892	14.0681	0.1757	1.619	1.7413	9.4745	1.7234	16.9635	0.6028	0.7513	2.5533	3.9727	10.893	40.9052	0.0466	17.3404	21.1267	7.355	0.0959	1.7141	4.9895	0.416	3.9258	8.9958	7.3757	8.5512	1.364	3.3538	0.5908	0.5277	18.4601	0.3383	12.0254	5.9096	3.6721
0a3d9bab-7802-4ae9-8ab2-56baa97563d9	0.3538	2.2776	5.6953	0.0607	1.2829	1.7758	12.2006	9.7351	5.3265	1.2596	1.4179	3.019	1.833	3.4977	12.1472	16.7871	0.2013	0.8278	4.931	9.9102	0.5644	10.6232	7.271	3.6895	0.2669	1.8719	7.7592	29.8652	0.3615	23.0167	14.8744	13.2754	0.1263	0.6901	7.5122	7.1431	20.0117	8.0325	38.1002	6.8415	4.468	4.78	2.4657	0.6951	26.552	0.0753	29.2495	12.3643	0.6718
5734ffbf-7b87-4a66-9e28-71e283e1c06d	0.6717	1.1602	1.9213	0.0218	0.1204	0.0767	2.2962	83.8817	0.334	1.0377	0.9884	2.2054	0	2.8147	5.6225	25.2341	0.1931	2.0163	3.6883	15.6672	1.8729	8.0439	32.2179	21.7884	1.2436	0.7653	106.539	60.4734	0.7768	24.0701	2.017	2.5048	0.8483	0.9839	9.4844	14.177	33.8412	8.8598	195.151	12.6538	1.0995	7.4968	5.58	1.8341	18.7408	0.1975	30.143	11.0907	0.2789
48971185-4abe-4951-8e9a-cbdec7caaeae	0.4731	0.1231	1.8514	0	0.5305	1.33	1.3922	55.1665	0.014	1.1724	1.4154	3.8253	0	5.0277	17.7244	34.0385	0.128	4.3594	0.2305	9.1384	0.9133	7.3251	8.7663	8.88	0.5261	4.1915	10.1461	133.29	0.4683	24.5197	12.9578	18.1624	0.0292	0.5147	7.8649	0.3411	9.7274	18.6009	36.7762	11.2705	0.2967	4.5873	1.8385	0.1607	21.502	0.0672	27.1183	8.6138	2.5267
1869f9e5-b9b7-4a59-86f8-6d327a180dbc	1.3466	0.4581	3.5105	0	3.6585	6.4491	1.4206	73.7419	0.0276	1.3136	2.3806	29.5601	2.5047	10.37	4.9346	28.662	0.6418	5.2034	0.2019	4.385	2.1709	10.9079	10.6008	38.3947	1.9198	4.6696	26.0145	172.055	2.1995	27.9304	6.7084	23.2082	0.0383	3.3094	10.9701	1.9522	14.3174	19.3754	81.7726	26.6742	0.1113	11.282	4.025	1.0553	31.4517	0.0588	46.7144	6.4277	1.0593
4999a004-b9d4-4f1a-95a9-24ba6c2888ad	0.3209	1.7365	2.8655	0.1218	1.1155	1.8711	1.5649	32.9218	0.1594	0.8607	1.7802	4.2028	0	2.2975	9.5474	19.9537	8.698	4.9649	0.1251	10.7703	0.0629	11.3422	5.2894	5.9784	2.2206	3.9847	13.8242	107.926	0.3696	29.6629	47.3177	50.0085	0.0317	2.0188	10.6105	4.7857	9.3805	16.9148	43.5752	15.1315	0.9966	7.377	2.3386	0.4359	30.8087	0.4131	18.9452	9.3022	0.6418
3072eff6-2b2a-4a85-a9f9-8d7e122a200f	0.4442	0.4832	2.2916	0.0431	0.9168	1.1602	0.2673	18.1841	0.6018	0.4591	0.8128	2.0312	3.9053	6.0068	15.6988	27.4435	3.9309	4.1888	0.0787	11.6012	1.054	17.0073	2.3658	3.2675	2.0653	2.6406	31.2421	82.1051	0.2688	20.6761	102.098	28.4664	0.0598	2.2286	1.9234	2.1082	9.0013	12.2401	9.4263	6.8155	0.3906	2.2974	1.6803	0.2468	24.7757	0.1834	3.7416	17.9805	2.2571
1af5437e-a89c-4986-bd93-80b73f653bd7	0.3925	0.3995	0.1672	0.0182	0.6673	0.6183	2.4696	13.0895	0.0273	1.2089	1.4944	4.4152	7.4276	0.1145	28.0501	15.5501	1.0422	2.0546	2.0455	4.4914	0.1318	6.6006	5.5065	4.0259	1.632	2.8384	26.1224	20.1466	0.5343	36.5665	43.4489	47.3207	0.0758	0.8677	8.6664	7.0228	11.6035	1.7926	37.4415	15.0759	1.0639	13.5651	3.26	0.7302	26.6598	2.2096	18.186	40.1986	3.2808
cfb8e34b-3927-45ab-92aa-d698d9642cad	0.2109	1.2341	4.0035	0	8.1122	7.1127	1.7949	22.4421	0.8699	0.6915	2.4407	18.5631	7.6478	25.2956	16.5636	29.7843	0.14	8.4621	2.3117	12.0563	4.5934	6.5852	9.9009	5.7953	7.3859	10.6405	13.2387	218.246	0.8537	34.8919	167.841	34.5194	0.1171	11.3727	22.398	4.1041	11.6342	79.1239	40.1452	15.3931	1.0199	5.9764	3.1716	0.3222	38.4137	0	43.8007	19.5408	1.0781
e53e9d32-8714-47b7-b345-c946ad2ccfcc	0.0122	2.4638	2.6981	0	4.7232	0.4204	0.6713	28.7171	0.254	0.7545	0.4557	2.8471	5.3259	0.1437	4.7698	21.0015	0.1245	2.3752	1.753	12.5518	1.235	3.8069	16.6776	13.3967	0.9933	1.7389	15.3008	39.0379	0.2345	21.5392	0.5323	14.7459	0.0544	0.042	12.7407	4.4289	19.8869	0.1522	113.82	3.8672	0.9668	3.7878	2.5032	7.5547	13.4193	2.6685	30.3326	10.7595	0.8759
bf96da08-98b9-4f16-95f6-c73f1e70c312	1.1508	3.4042	3.0323	0.0428	1.7722	2.1732	1.1517	20.0558	0.4559	0.7021	1.9529	4.4475	1.9413	3.3676	16.1552	23.4675	21.1038	2.9151	0.2738	9.3962	1.7859	7.5542	7.5718	6.9568	1.5177	4.1702	13.501	70.5338	0.7223	47.1676	19.8664	34.9281	0.2675	1.7652	8.5196	6.3994	10.0229	10.2456	40.2348	11.8703	1.237	10.8407	2.8681	0.8997	31.2916	1.0942	16.9046	10.6366	0.9304
6547f9b3-6299-48a8-bd2f-729cb5e17f79	0.4299	0	2.2965	0	1.6892	12.5741	0.36	6.993	0.0075	0.8136	1.9154	16.6137	2.0451	14.6162	25.6072	52.3902	0.3743	10.1248	0	11.3565	0.8085	10.3623	0.8486	1.2914	2.602	10.2203	97.6016	197.602	0.0913	33.7624	257.598	6.8328	0.1252	7.1088	3.7591	3.5014	5.405	83.8526	5.4676	14.9015	0.6364	3.4297	0.7739	0.8616	42.2291	0.1441	6.3134	28.4932	2.4216
66b391e7-dacd-4fe0-928e-bb98edf29b9d	0.0185	1.7551	0.0908	0.0396	0.3897	0.3088	0.748	40.4771	0.0132	0.1945	0.3358	0.9991	0	0.0829	6.55	13.9502	122.14	1.3359	2.4566	2.8688	1.363	6.2637	19.8169	11.0094	1.1817	1.4566	11.1895	24.6977	0.4736	27.5617	0.7883	24.4241	0.2196	0.9679	11.699	2.5082	12.6719	0.7856	71.5175	2.7405	0.7173	3.0695	7.6949	0.1511	15.8317	0.0632	43.2072	5.8636	0.9098
69c1ba64-b5f8-4a80-b081-1aa83b273d88	0.0207	2.9457	0.5906	0	0.8689	0.3614	0.456	35.7709	0.9313	0.2169	0.8319	2.4008	1.9986	1.9416	28.9635	50.616	0.317	7.3789	3.3831	15.4369	1.2156	17.0108	12.3733	4.1018	2.9412	3.4036	19.9787	103.707	0.528	31.66	4.554	2.7167	0.5202	0.691	8.9119	16.1518	18.7953	5.4455	73.9056	13.6976	0.6516	12.2841	4.7866	0.6737	55.9022	2.1593	28.2547	6.7605	2.8738
c00f7120-4106-4f03-a967-e80a35e311ce	0.6894	3.118	2.2575	0	1.3132	1.3358	2.0757	45.9343	0.0374	0.2584	2.0815	5.2068	0	2.3132	5.9249	31.9634	0.9338	2.3275	0.0823	8.6825	1.5052	6.0159	15.7862	17.9473	1.1576	2.3172	19.2331	117.262	0.6911	33.4143	1.795	13.0033	0.0313	0.7539	9.8189	0.1956	14.1446	5.9888	104.433	12.6882	0.862	5.0179	4.0735	0.9459	33.8038	31.8295	25.4646	9.3687	2.4744
96acf848-ff7c-422f-8c2e-616e340a751d	0.6083	0.0216	0.9315	0	2.1625	1.3819	7.1006	13.3773	0	0.6167	1.4194	4.6203	4.0117	7.4231	12.0105	19.0401	0.2325	3.012	0.3234	21.2288	0.61	13.2526	6.7583	5.1932	0.9532	3.4717	9.353	33.403	0.3508	41.7981	38.2476	32.1975	0.0614	0.494	5.9803	3.3702	8.8151	6.1149	35.6661	9.8631	2.1252	4.4911	2.7451	0.0845	28.908	0.1178	32.2856	7.7493	2.0359
11e50f83-6857-4dc8-8fd3-2f4c9a165b1a	0	0	0.18	1.1922	0.1298	0.202	0.417	17.1671	0	0.8483	0.5029	1.241	0	0	4.967	14.9433	0.3122	3.7072	0	16.3331	0.0973	0.3531	0.7432	2.6255	0.523	0.6882	18.0514	72.2235	0.0952	16.7632	6.0515	42.2338	0	0.1111	2.1377	1.5392	10.3204	4.0218	6.5836	14.2325	0.4581	1.2918	0.9948	0	24.0788	0.0751	10.1231	10.8241	0.3607
bc0b8c97-4f8e-4916-bebe-267f4b55460f	0.1575	0.0205	2.2511	0.028	2.2684	3.7555	1.6513	17.1808	0.559	0.1378	1.9026	9.127	1.9044	8.0168	15.3024	26.923	0.7784	4.1821	1.228	15.4785	0.9846	16.745	7.2067	7.2155	2.5106	5.8291	12.7686	102.926	0.3543	23.5399	101.784	51.9698	0.2041	4.1217	9.5971	1.0341	9.8325	28.9193	48.248	11.7903	0.8889	5.3341	3.0999	0.4012	25.4143	0.2684	19.1784	10.8285	2.3625
1b99113f-4d98-4ea5-acd2-7b71b99f2bd0	0.204	1.8718	2.1808	0.0132	0.1871	0.7414	0.6198	20.8799	0.8687	0.4217	0.56	1.3994	7.1747	0.9957	8.3326	36.3944	0.1532	2.1669	2.747	8.5113	1.1182	4.6037	8.6037	11.8081	2.1172	1.0681	15.5357	47.181	0.2603	15.3772	35.8513	11.8369	0.2197	0.1784	5.7422	6.2795	18.1909	2.529	87.4545	12.1559	2.2858	4.4728	2.464	0.3023	25.291	0.0211	23.6007	8.3136	1.416
a44cc07f-e677-4d4f-a7b8-63bdc310d195	0.871	9.6221	0.4168	0.1162	0.7897	1.7512	1.8664	16.6152	0.4636	0.964	1.5341	4.7679	0	1.918	7.7078	19.2157	0.3132	2.9871	7.5992	7.6952	4.5333	15.3007	11.1091	4.3326	2.8753	6.8675	10.0487	62.7698	0.6098	24.426	26.914	5.6543	0.393	2.5994	8.2655	15.4515	10.8613	9.5552	51.9542	24.9001	0.7607	19.1562	5.2096	3.9098	31.0799	0.6956	35.6049	12.22	3.5069
b0e4c150-579e-4df9-ab6d-35da25c995dc	0.0073	0.0227	0.8723	0	0.715	0.4539	2.0756	24.6467	0.0619	0.572	1.2141	2.8722	0	0.1463	4.9503	16.3754	0.09	2.1901	0	15.5337	0.2084	14.0704	9.3788	13.5476	0.5495	1.9596	13.8541	78.2047	0.3295	20.9618	2.2757	15.6646	0	0.1198	8.1593	0.0269	16.3616	4.4994	69.1865	8.4339	0.8905	3.6841	2.0767	0.9772	20.835	0	33.0848	7.7097	0.5945
e35fb22b-b902-4d1f-97f6-840d3f499947	0.3584	14.6476	10.0216	0.0577	0.9723	3.5479	3.837	1.4274	9.2138	1.2418	1.225	2.5996	5.8856	2.8134	2.312	36.6714	0.0957	1.5616	10.7137	8.5789	1.8794	11.2403	5.4053	5.513	2.9172	5.9395	19.5993	88.1371	0.7592	16.944	13.4109	3.7253	0.0901	1.7281	4.3481	8.1091	17.0026	4.9716	48.3446	11.0465	0.9739	14.0047	5.4817	0.5786	50.3013	0.5299	9.3147	20.391	4.1485
368effd8-38b4-48f8-8405-642bc28900b6	0.0255	0.0397	0.5508	0.0091	0.5351	0.371	2.319	27.85	0.0135	0.4452	1.0674	3.9021	0	0.3416	4.9955	25.5283	0.03	2.2165	0.0496	2.7301	2.0587	16.9369	33.3809	12.9412	2.6227	7.1787	7.6223	66.1496	1.0534	4.4271	0.8857	8.378	0.0377	1.4339	2.847	7.0769	24.0199	11.632	141.28	13.0454	0.5928	9.3591	2.6352	1.0372	35.518	0.8961	74.319	9.07	1.7004
a9e9a28c-f7b9-4e72-9abd-d9aaf61ea1e8	0.2504	0.0617	0.7588	0.0985	0.8645	5.3353	1.8824	9.5069	0.1684	2.6282	2.043	6.0623	0	1.2384	27.6072	15.3105	0.1866	5.1708	0.7321	6.5441	0.4943	12.5392	5.9668	6.2792	4.4263	4.3739	29.6052	71.1432	0.555	20.7557	9.861	13.8297	0.0878	1.2407	11.2175	0.6353	12.4294	18.8367	67.9605	15.4441	0.6376	9.0499	2.8648	0.4834	27.2766	0.6512	37.1304	13.8773	9.1114
d0655562-fde7-45c1-8cbf-35addbd5753b	0.5088	0.283	0.0788	0.025	0.4574	1.0302	1.2059	5.2471	0.3269	0.6291	1.3303	5.2117	3.3939	2.0017	3.4552	10.4288	0.2899	2.3805	1.6072	3.1591	2.3094	12.1671	2.9292	2.2235	5.4757	5.0666	1.3343	38.4065	0.3536	15.457	8.6829	7.2544	0.2208	1.6274	6.9025	6.2715	12.9856	11.2032	31.3429	10.9382	0.4652	54.7417	2.1816	1.5729	18.1054	0.3985	26.0672	4.165	4.7126
6f73a012-899f-46a6-963f-4c04a3c6af2b	0.2952	0.0288	0.6328	0	0.256	1.6135	0.7503	40.3111	0.0295	0.8713	1.1328	3.381	2.6767	3.467	9.1706	36.113	0.1633	3.8078	0.5933	9.0116	1.9332	3.1026	14.7049	12.8881	1.8874	3.5602	48.5366	127.644	0.8565	32.0914	2.782	27.7733	0.082	0.1901	6.6149	5.2325	17.6858	3.7739	62.3498	17.6625	0.6743	9.8708	5.6195	0.7894	31.8974	0.0943	29.4628	24.5278	6.7164
f2c86905-31e6-47d9-984c-b83c6cb696e7	0.2329	0.3789	0.8921	0.014	1.1172	0.1639	5.8518	25.0463	0.0035	1.3599	1.4858	3.2063	1.9037	2.2236	5.1148	17.5422	0.0523	1.4293	0.1343	10.0665	0.6947	19.7494	7.2357	7.0025	0.3648	1.5627	4.6008	76.2299	0.4463	28.9951	0.8752	16.6224	0.1457	0.0631	7.6013	0.1095	13.5294	5.06	48.1302	12.8046	1.4528	5.3238	2.2155	0.3208	19.8897	0.0335	39.4778	5.2207	2.0127
997d54bb-066b-4b62-a6f7-7963a75b8f65	0.223	0.6704	0.7083	0	0.6668	1.7131	0.4844	31.9112	0.1231	0.5201	0.9312	5.5801	4.7936	7.3731	9.6621	37.7506	0.4971	4.9251	0.483	5.734	0.9293	30.2026	4.2168	5.9405	1.0655	5.2154	23.4474	164.915	0.1338	22.3022	124.651	32.5292	0.0367	3.5074	3.4149	1.1331	13.3691	23.7467	12.7618	17.4645	0.3552	3.3882	1.5531	0.6059	27.146	0.8162	4.7968	16.5361	1.6894
b9d646c1-50ea-4bc9-9693-349207a8b348	0.3748	0.0867	0.034	0	0.2918	0.1734	2.0742	12.4042	0.0049	0.7283	1.2666	4.9044	1.3425	0	8.9546	12.1589	0.8108	1.4854	1.9478	5.8704	0.2347	7.158	4.4118	3.5393	1.173	2.6523	19.8757	28.6563	0.1549	28.5729	29.9988	60.8864	0.0411	0.1335	9.1385	3.8336	9.6335	3.1973	19.331	10.2609	1.2831	11.2805	1.2944	0.1131	7.6905	1.8287	18.3212	24.7914	1.249
4ec84128-c55d-4755-9364-5d7d3a7da156	0.9429	0.8767	0.0491	0.0143	1.805	1.086	1.4926	18.4452	3.7232	0.4211	0.6461	1.6579	0	3.1863	11.7237	30.9239	3.1485	2.8478	7.1941	10.9897	3.3633	10.506	22.8965	21.3494	1.9928	2.4187	25.3555	37.0839	0.7508	47.8835	1.8615	8.5562	0.2674	1.0199	5.6482	19.2747	15.2947	0.8872	86.5198	11.4685	0.7907	11.1757	3.6209	0.327	49.6512	2.005	25.9836	27.7923	1.0941
bd4fa75d-d413-419e-b203-ee7b3df1d1f4	1.3033	0.4992	0.4505	0	4.5589	7.8518	5.7174	17.2174	2.0175	1.1328	3.0582	6.2061	0	12.1815	22.1578	26.3057	18.8526	11.7746	6.0778	25.0509	2.3284	27.9299	3.3502	1.9412	7.9311	7.1015	18.1435	77.4478	1.0446	55.239	92.8383	21.2329	0.3197	8.4934	10.4677	18.6311	6.9163	12.9522	24.7942	19.3291	1.633	15.9506	2.4776	0.2933	44.519	2.5338	23.5127	24.646	2.9435
0ca9db0d-531f-42f6-a244-fbfe435ce7ce	1.6358	1.11	10.2691	0.0569	11.483	21.0361	3.6913	18.8299	7.5148	0.5598	3.4539	12.1869	0	15.9004	10.9798	24.2051	0.1652	8.0674	3.5087	14.9887	4.4028	5.5315	12.5016	10.3843	4.4485	8.2401	29.6847	81.9104	2.0636	24.9195	143.126	8.739	0.5332	63.0296	27.3033	10.0112	15.0226	41.1619	88.1496	12.4212	2.0928	14.8126	6.3918	0.163	32.2855	0.4392	30.2335	45.5811	1.8909
86f3d378-0e63-4a01-b485-b23246eac9b4	1.2412	1.0059	2.1344	0.0127	2.7549	8.3945	2.6075	24.0608	0.0191	0.6576	2.8229	21.2493	1.7315	7.4891	15.6696	66.9249	1.088	5.073	0	10.0952	1.8693	14.9377	5.0579	5.1662	4.2468	11.833	19.3238	275.692	0.277	37.7892	70.8766	45.3999	0.053	10.1597	12.0453	4.325	7.4763	51.1677	62.4486	19.1895	0.6799	4.8497	1.8759	0.8025	45.957	0.2033	26.9478	17.2315	1.611
d2fd4030-88b6-48aa-99e8-59a808a3b870	0	0.2561	1.9811	0	1.7444	0.3514	0.5321	19.0089	0.3556	0.369	0.2949	2.653	0	3.1068	14.9849	11.6229	0.2904	2.9083	4.2828	4.795	0.1551	3.2378	5.0796	12.9646	0.5734	0.8138	19.0895	16.9885	0.1455	12.4656	46.1502	23.023	0.026	0.7488	1.1664	0.9776	6.0613	1.555	33.7923	2.1659	0.4535	2.0154	2.1153	0.2865	15.3778	0.3394	5.2128	13.6603	1.0067
1f986941-841d-44d4-95f9-c3d4fcb71c04	0.0044	0.3176	2.7526	0.0755	1.3726	0.6079	3.2634	3.3617	0.5133	0.5106	1.1131	1.208	0	0.6234	5.1917	6.607	0.8926	0.9637	0.181	1.8098	0.3903	6.3548	0.4474	0.4458	1.456	2.0143	4.8974	23.803	0.1672	10.554	2.1036	38.0757	0.2162	0.3465	3.3752	0.533	3.3331	5.0622	4.4948	6.0824	0.7893	5.3644	0.7452	0.1082	8.364	0.1055	4.345	4.0688	0.3619
9c6906c3-a740-4231-88eb-54954e3ee8f6	1.6918	0.4169	6.326	0.0272	1.5563	2.2089	4.0423	8.1005	1.1714	0.9344	3.1879	5.4848	3.6908	1.8354	15.2313	21.2975	8.3195	1.9377	2.5287	17.3087	1.3469	24.0184	4.5637	1.4275	3.1118	7.189	28.649	125.579	1.0987	37.9457	2.6557	53.8636	0.1695	1.3808	15.9541	16.0924	8.8189	17.9321	25.35	40.8103	1.1348	19.1036	2.0089	1.1663	38.2578	0.2817	20.7844	13.4748	3.3298
93e213e6-fb7d-4a3a-906b-f297bef94e8b	1.5912	0.0705	0.8755	0	0.949	2.9607	6.9874	14.8759	0.3444	0.8685	2.2035	4.6767	0	1.439	14.1087	14.136	1.578	3.3827	3.4091	10.3063	1.4107	18.019	6.8839	5.2037	3.3128	5.163	16.778	37.467	0.532	51.8802	47.0777	23.6241	0.2172	1.2147	13.314	12.0419	10.2473	3.972	51.3746	19.9659	2.1996	24.4759	2.6762	0.7818	37.0495	2.0251	26.1658	17.1902	3.6927
676ebe30-6ee9-46ef-a6ba-fe916fd4893c	0.1048	1.8404	0.4387	0.0093	0.8263	2.5098	1.7431	41.4867	0.981	1.1687	3.1912	6.1671	6.3358	4.074	7.1493	26.2152	0.1469	2.9186	0.1277	19.5544	1.262	8.603	26.8576	38.869	1.2626	8.0111	27.4114	80.763	1.3249	32.3884	2.3808	9.1775	0.3686	2.4424	1.4265	2.8091	16.9986	19.3874	135.18	33.5436	0.9201	16.044	5.7346	1.8152	36.4206	0.4911	41.1159	12.965	0.4287
d28e65a1-7f1c-45b2-b74f-0f7a1ff11787	0.0284	0.8679	2.377	0.0727	1.3455	0.2552	0.9445	17.248	0.8336	0.9527	0.9594	2.9766	1.6463	2.2847	11.2885	17.6905	5.1623	1.8588	0.1327	10.0813	0.4005	10.8772	8.6893	7.2773	1.5142	3.335	23.2405	58.0721	0.4227	23.0922	3.2248	11.9919	0.0252	0.2027	4.6333	0.3786	10.4479	5.4894	82.3527	7.3403	0.6709	7.4156	2.9017	0.4856	31.7797	0.7733	22.5732	4.6759	0.557
b1c573a4-6b8b-4d5f-9c9d-fe87d723cbb3	0.7414	0.8655	1.2995	0.0129	0.2281	0.3464	1.6419	9.0769	0.7765	0.3163	0.8615	1.8843	0	4.4094	5.3317	17.1531	0.2454	1.323	0.141	11.9292	0.3856	3.707	6.1541	6.5162	0.8043	2.6475	10.6071	40.8419	0.2017	18.5382	11.0466	25.5156	0.0268	0.4307	3.9993	3.0727	10.5619	3.0325	52.7533	10.7835	1.6716	6.1734	2.3301	0.4421	20.6414	0.1438	12.3255	9.6123	0.4438
ff48f222-2f62-4f5d-bb46-0c13a2d5afd8	0.6275	0.1904	3.4874	0.0062	0.2492	1.0308	1.5222	76.148	0.0247	0.3658	1.2339	3.758	1.6859	1.5207	5.6993	30.4684	0.1131	3.7164	0.1019	7.9596	0.7434	12.0736	26.8338	34.1863	0.5039	2.3409	42.2024	96.091	0.5081	23.2711	3.1	12.9271	0.0516	0.1796	9.2445	0.1777	27.9646	5.7497	87.6314	7.173	0.7869	4.1447	4.3303	0.3907	28.2951	0.1386	37.2572	17.1782	0.6654
979bb0f5-7e4e-44c2-8135-14bb3fde1bc6	0.5317	3.0066	1.124	0.013	4.7217	5.8913	6.2992	27.0248	0.0129	1.5146	1.1743	3.1989	4.408	5.73	30.9912	22.6313	0.1129	3.4539	7.4259	7.9267	1.0791	4.1021	16.8859	13.4585	1.8109	2.0459	11.0911	27.9945	0.4363	32.3832	11.2423	4.9946	0.5939	4.196	29.1689	12.0528	29.7083	10.3976	67.7764	8.9396	1.326	7.5473	2.3125	0.4086	36.1777	0.2588	44.9918	21.9293	0.2983
f7b21076-fac1-4cb4-85a1-d293504b88e8	2.7295	0.1048	2.6858	0.0239	1.2135	4.6679	0.7195	22.1195	0.0834	0.9392	1.0133	6.9942	0	4.5796	13.72	25.4523	31.8404	4.2694	0	30.1098	1.604	22.4665	8.4042	7.1739	2.4878	6.8462	43.9606	181.937	0.9904	58.9248	19.5927	36.2728	0.1491	4.2887	12.3893	22.0011	9.6261	15.8321	53.9015	33.575	1.3467	12.7394	2.322	0.4103	46.9388	0.3812	13.8213	16.2602	1.0982
31deafec-e666-4cc6-8f3a-857a3b6b6ed0	0.2391	1.6182	0.7765	0.1892	0.8267	0.3087	1.443	24.6094	3.0426	0.5356	2.0114	3.1851	0.7794	5.1016	2.2199	27.4286	0.1284	1.3067	2.7956	15.108	1.3688	10.3503	10.9954	4.6263	1.0155	3.2357	10.7694	63.1248	0.4524	16.4393	4.798	5.7013	0.2267	0.5537	4.853	5.7459	19.0539	2.9997	34.5899	19.6185	1.178	14.1792	4.2665	0.8866	46.4518	0.5766	23.7786	13.2555	0.1978
18ada3a8-1e1c-418e-91a2-8f315e995319	0.1767	1.6192	1.6897	0.0365	4.4435	2.991	0.9273	10.3888	0.1639	0.5384	1.5491	9.6063	0	4.782	11.1452	21.9178	0.3531	6.9841	0.2	6.5511	3.3071	8.1615	1.8942	2.7416	2.3833	5.578	3.4478	150.486	0.3139	16.5308	766.495	14.8449	0.2532	3.9478	10.5461	2.2823	7.04	45.4108	17.2519	15.3386	0.2696	3.9646	1.106	0.4181	20.2259	0.0777	23.7343	8.8589	1.2591
a117e882-116e-4468-9371-aaf83a708a74	0.0818	7.637	0.2606	0.0524	1.1147	1.5334	1.2073	21.4189	0	1.4169	3.3272	3.9104	2.3742	0.4942	7.4969	39.0692	0.1738	2.9084	5.6933	17.4724	1.1733	14.9786	9.2603	8.6581	3.7487	11.6537	25.151	116.005	1.228	80.9616	6.169	2.094	0.2545	1.3492	11.714	7.8719	9.4124	34.6056	71.6111	26.3126	0.8795	17.886	2.7938	2.1007	50.6233	0.2509	38.6694	12.8758	2.142
d705d53d-7b72-4a4c-b0fb-5c8cb551e634	0.6701	1.1262	4.0587	0.0943	1.5232	5.8138	0.9611	26.2692	0.2822	0.5409	1.6008	7.4347	0	9.4385	11.5971	32.2398	3.4408	4.559	0.6027	27.0795	1.9492	8.7736	6.0637	5.9362	3.2423	6.0995	29.9644	87.3289	0.787	36.8811	42.7028	34.7157	0	6.7487	8.6246	11.7244	12.8691	27.355	40.9174	16.4931	1.1555	7.3348	2.1375	0.4501	50.1488	0.5269	15.0563	24.0572	1.5059
dae2b261-53e4-4944-bef7-4a36fb77fa07	0.0063	0.0396	0.6375	0	0.8165	1.5857	2.8932	35.4581	0.3851	0.1998	1.7758	2.1664	0	2.6407	5.0355	19.4968	0.0112	2.578	0	11.4803	0.014	8.0804	7.1823	13.8375	0.8186	2.7874	8.9343	64.8148	0.4248	45.1125	1.4722	18.7057	0.0564	0.1046	4.5508	0.6117	9.281	6.2803	76.2747	15.9512	2.5513	3.2822	3.0546	0.1552	24.3924	0	32.8541	6.5479	0.1558
169e2872-37bb-4091-bc4f-e23b506f6f4f	0.2463	0.3472	0.8563	0	1.9039	2.0247	1.2322	38.4038	0.0169	0.2501	1.0714	4.5387	0	3.9453	8.7783	35.06	0.1266	2.6285	0.1393	23.884	0.7185	5.5726	14.0789	20.8874	2.7561	4.9388	47.2913	80.6965	0.5918	29.4457	3.225	29.7531	0.1765	2.5216	8.1495	10.9854	20.2599	12.1215	82.1283	31.7125	0.8881	9.7552	4.8632	0.9712	42.3761	0.5143	22.2314	21.1482	2.1446
9afd63d7-b2ad-4b3a-9b31-fd1e9cb397a9	5.3508	2.8017	9.4721	0.0491	15.5017	23.2317	5.0717	8.745	56.5974	0.3019	2.2006	10.3783	20.033	1.4673	8.1275	28.0355	0.4685	3.0723	9.2176	7.7233	2.4623	4.81	25.8241	10.0149	2.9174	5.5372	18.2549	23.6305	2.0375	30.9972	6.1396	19.0197	2.1471	13.8357	13.126	19.9651	19.342	22.2656	105.284	11.569	5.7145	54.5575	7.1482	0.2814	46.3653	6.1557	21.1127	20.7022	1.5062
9fd459e5-13e0-4a7e-a3b5-cea50ca677ad	0.0071	0	1.7858	0	0.4327	1.9463	1.4329	51.595	0.1065	1.3875	1.5968	3.8262	0	2.1583	16.5862	32.3175	0.0379	2.9265	0	12.7469	0.5991	30.456	10.9788	21.8344	0.4768	4.0736	14.5853	87.897	0.733	25.7189	2.9841	11.7045	0.0317	0.3535	8.0789	5.0736	14.1471	4.7805	64.496	16.0075	0.507	6.4998	3.472	0.4368	23.9958	0	30.0647	11.6397	0.9939
f43c0be3-6cd7-4b0c-aa2f-5d79bbd5631c	0.3804	0.8428	0.471	0.0175	0.5676	0.4702	0.6964	10.1323	0.0087	0.2361	0.387	1.8374	0	0.9883	3.8884	12.5047	0.4851	0.9917	0.4066	3.6482	0.4151	5.5032	3.2111	2.7545	1.2554	1.4532	3.7765	35.6683	0.1237	16.7619	1.803	16.8603	0.0182	0.2473	3.758	2.2217	6.6024	3.7315	24.037	5.0804	0.343	4.4813	1.7966	0.3001	19.6582	0.0976	12.9386	4.3931	2.1417
4d3f23b7-71d2-4787-9279-e817961ca6c0	0.3944	0.9308	1.2254	0	1.2134	4.6869	1.0008	13.6053	1.8536	1.1609	1.3167	5.081	8.3733	5.8101	13.055	29.1956	0.1192	2.5053	0.1687	22.3093	0.5729	7.6258	2.0846	2.4675	4.1502	5.421	20.8401	59.2614	0.1766	16.3467	18.2981	8.833	0.1709	2.3793	5.4495	1.8009	9.2639	10.1041	47.1272	13.7243	0.7651	25.389	1.7218	1.0584	25.4269	0.0328	11.6472	11.3604	0.3148
2c72d011-d410-4fed-be75-6d2d1a0e5d68	0.1329	0.3525	1.4809	1.7016	0.2681	0.7635	1.6586	23.2312	0.785	0.3486	0.9761	2.7927	1.9274	7.3112	14.3911	24.6015	0.3763	1.2839	0.3107	10.8559	0.7327	6.4789	5.6943	7.6374	0.8273	3.7864	390.505	54.273	0.4518	17.5257	30.203	37.7783	0	0.1552	4.2209	0.4433	11.4321	6.3899	36.0715	5.2543	2.1849	5.9232	2.1182	0.0812	34.5797	0.3395	11.9825	35.7444	0.8151
4056b190-7cec-46d3-a4ee-6f76934ba58d	0.6277	1.0657	2.2663	0	1.7225	2.504	3.3331	25.4952	0.1641	0.7512	2.3277	3.601	0	2.6607	6.1209	16.6164	0.4094	1.9842	0.1288	13.8715	1.1418	6.7198	6.0991	4.4392	1.7144	3.9478	7.0116	54.7843	0.4399	32.1741	3.3211	26.1598	0.0489	0.1211	12.2528	0.5512	11.8332	8.0974	40.4772	7.4898	1.1127	6.6774	2.8325	0.6732	22.1865	0	24.2874	8.8254	0.7207
2b0f7ab4-6b00-4803-9547-3ff162048cdd	0.6751	1.0286	1.5358	0.6177	1.3788	0.6828	1.125	33.3113	1.1466	1.7291	0.9384	3.7255	13.9922	1.1867	6.0587	17.9017	3.3859	1.9221	2.3967	29.6321	2.0212	4.5953	8.554	8.6885	1.0367	1.804	15.5931	75.1107	0.6855	26.1287	3.4493	7.0173	0.2142	0.3092	9.4756	5.8699	16.6272	5.3764	60.5749	17.1115	2.0907	7.6581	6.2016	0.0983	29.475	0.0274	32.0248	14.6812	0.6575
f14a2c05-690d-440a-b609-3f843d4c30a1	0.2591	0.0188	1.1071	0.0643	0.6688	4.2306	0.7523	18.1045	2.0591	1.7073	0.9703	4.4384	1.7483	6.8744	6.9763	18.8126	0.224	3.3853	0.2114	11.3014	0.6513	8.5403	8.3571	7.7557	2.3852	3.4346	10.6031	52.472	0.3513	19.032	7.3383	20.9888	0.0268	0.8528	7.8726	2.1221	12.5727	5.0966	52.0353	12.4275	0.4793	6.0022	2.7008	0.2946	20.9779	0.2874	25.386	7.9469	1.3802
56ba32c5-5ff7-4376-9acd-2deeb552dac2	0.9119	3.1052	6.4311	0.0786	3.439	1.2428	1.6726	17.4998	1.0786	0.6766	1.8541	2.747	5.3451	2.4726	22.8367	18.3297	21.8472	2.2933	4.2546	9.9717	2.9259	13.8074	4.3471	4.7254	2.9497	4.2092	8.7965	52.9012	0.9646	37.4017	1.6025	139.569	0.2046	2.5946	8.6732	10.9613	9.9382	5.8559	26.0048	21.9933	2.0395	7.1571	2.563	0.6756	32.8576	1.3809	22.5327	11.5802	1.0549
77c3097b-b711-43d9-9431-e27153899d55	0.1929	0.1721	4.8887	0.0235	3.2541	0.606	8.5818	5.353	0.5693	0.3471	0.6658	1.4856	1.5995	1.5538	36.7735	7.0933	0.4001	0.8397	0.0645	2.9016	1.1917	2.9929	0.9026	1.2373	1.6673	1.2462	3.0027	47.3996	0.1309	14.1195	1.5985	27.2844	0.1714	0.6211	2.9963	0.562	4.3994	2.499	10.9738	5.0939	1.4813	5.0979	1.0116	0.1348	14.7288	1.1458	10.2843	2.1909	0.8117
dffef1f3-64ff-4272-9290-ae77b1ab8409	0.0224	0.2558	0.2738	0.0318	0.6015	1.7313	1.508	41.1557	0.1586	0.7819	2.1147	3.4268	0	0.5	11.9609	33.0765	0.1451	3.2219	0.0436	25.7738	0.3452	9.3073	13.1683	14.1633	1.6901	2.5746	17.4856	74.1284	1.0779	32.4101	3.4568	17.6311	0.1986	0.3174	13.7463	7.2507	17.606	3.4188	69.4551	18.7817	1.4896	7.7255	4.2249	0.6376	31.156	0.0508	30.4698	19.3871	2.6818
9f909512-d56f-4fcf-b5a3-c09f6599376c	0.9373	1.8444	0.6655	0	0.0343	0.1867	2.0042	10.5619	0.0217	0.9622	1.1211	2.294	0	3.5553	16.6148	43.9629	0.0721	2.0136	0.0794	9.3822	2.0975	5.9063	10.4665	18.9462	0.3927	1.8205	21.1644	102.926	0.1247	67.9535	1.1817	2.3719	0.0603	0.028	4.0036	3.1474	20.8941	2.4406	145.564	11.2967	2.6865	61.5468	3.8615	0.2491	51.3997	0.2777	17.412	13.541	18.5571
a825833a-556e-434e-9b0f-68e12579648d	0.0053	0.149	0.6108	0	1.0304	0.3711	1.7559	3.9192	0.0847	0.2505	1.1425	1.8869	0	1.1036	7.5911	6.2249	0.2723	0.6516	0.031	8.0226	0.4915	3.9248	0.9452	1.5307	0.8965	3.4861	1.304	60.406	0.0802	12.4597	2.3995	27.6119	0.2121	0.0729	3.8578	0.2458	4.1387	4.6333	5.5754	12.2343	0.5246	3.2839	1.3723	0.1297	12.2527	0.0361	11.0102	2.8741	1.9527
1a07e67a-d516-4957-b1fe-305a7f7f7a69	0.7869	2.5158	17.1252	0.1152	3.7303	2.0297	34.3327	37.2432	16.0459	0.7326	1.0411	2.9872	2.7621	3.7693	16.6223	35.1235	0.5673	1.7983	4.23	24.0684	0.602	10.5194	7.8086	5.5959	0.9879	5.175	34.3947	54.4636	0.6303	37.6089	17.9973	10.1741	0.2819	1.8967	12.1783	23.1625	17.4296	10.7533	51.255	13.6519	2.7832	11.2448	2.4436	0.5819	57.3975	0.4973	22.0327	32.8258	0.8566
d21ae98f-83e8-4ce8-9554-37998bdcc2ff	1.5218	0.557	1.4451	0.0106	5.7648	11.9148	5.9916	12.3127	0.7071	0.8583	3.8715	12.5035	4.3148	15.5355	15.9806	27.1322	14.6351	14.1845	6.695	22.8327	3.521	13.4084	3.0794	1.6575	17.1971	15.8324	7.9337	187.146	1.3861	59.1175	214.8	24.5195	0.4184	17.9411	21.314	18.9739	6.2766	65.6865	31.4448	21.803	1.364	16.0381	2.274	1.0302	54.1811	2.0605	69.205	17.0074	4.8255
d87075e1-ac28-4d7c-84d9-ab7847b353db	1.6644	2.3585	3.7423	0.0117	3.9089	3.0918	1.0253	17.1832	30.8582	0.2873	0.4739	5.2332	6.3546	0.9554	4.5394	50.6281	0.0872	2.2779	4.7059	6.7833	0.6039	6.2872	15.3723	10.4834	1.1933	4.0139	26.3673	47.7403	0.4906	11.3439	33.3408	28.1218	0.5838	3.2201	7.0558	5.2877	12.7183	9.8374	79.5154	8.4188	2.0481	43.2834	3.9941	0.6024	43.1311	1.0634	9.9103	16.725	0.6719
226ea4c8-457a-4db4-a48a-473d3323842f	1.6215	2.9059	0.4386	0.0109	1.8453	3.8598	0.9966	31.9619	1.4267	1.3688	1.0605	3.1429	0	3.2268	24.1753	46.9528	0.1539	3.7535	1.1066	10.2875	0.0903	15.065	13.6961	7.6617	4.846	3.626	59.3616	82.4596	0.8449	31.9979	68.1691	12.1504	0.8181	1.8485	2.2843	15.2368	17.1955	6.4474	70.7308	21.4399	0.8247	26.8838	1.8542	0.6878	39.685	0.7669	45.7866	24.4538	3.1801
a775c855-db88-42ef-9c02-d5f6459f8bd8	0.251	1.1275	3.4646	0.0261	2.4093	1.3002	1.4013	17.318	0.0978	0.6746	0.9859	1.6939	0	4.4374	12.6975	19.7543	0.401	1.5944	1.8614	6.9093	2.6605	6.1476	4.1276	3.1969	4.7653	2.5604	31.226	30.5227	0.7932	30.3065	37.0672	26.7076	0.1632	2.12	14.4198	5.2769	16.8961	8.7321	20.1073	14.6635	1.2766	10.7932	3.6097	1.1227	18.8361	0.0626	12.9723	33.976	10.6175
1bed3d23-47f1-43ce-8572-879c0d4df6b6	1.2316	0.4781	2.7515	0	0.1288	0.1594	0.857	46.52	0.0543	0.5692	0.912	2.2471	0	0.728	3.9933	26.8289	5.4896	1.4843	0.0746	4.811	0.3378	9.6885	10.5101	8.9153	1.5611	1.9372	46.7906	80.098	0.5925	20.8043	3.0347	21.4023	0.1984	0.1052	5.6995	2.484	7.1698	5.1506	52.6822	11.0858	1.1524	4.2594	4.3192	1.8723	24.6787	0.1305	27.1612	17.0188	2.6623
a80ff9ec-2e05-4f19-9995-be1ded568b31	2.0613	5.3862	3.4275	0	4.6354	26.8475	3.8992	15.6861	0.417	1.5661	5.351	11.3279	0	15.962	18.5197	22.8461	8.7832	12.268	4.4173	27.0557	3.8682	24.4681	3.6384	1.239	12.9851	10.6332	13.4769	125.37	2.7894	75.5468	63.288	37.2354	0.7044	18.2765	17.0895	15.2491	7.7765	35.9401	34.5062	26.477	1.564	11.7386	2.7778	0.3421	46.5548	2.3835	37.4525	27.9468	3.5099
665ce266-2e04-4dbd-a714-90425aaa3a25	0.4369	2.3972	3.6817	0.0565	1.4697	2.2828	3.2184	29.6281	0.8176	0.6948	1.4659	4.6625	1.9209	6.7978	13.0577	26.9256	3.3163	2.7652	2.4773	12.6453	1.8109	6.7115	5.5794	4.0029	2.2379	5.1313	21.7542	98.6558	0.6147	30.6326	9.7521	37.5113	0.1176	2.8019	10.8798	5.78	11.8658	21.0082	36.948	13.6054	1.5655	6.1056	2.3002	0.2428	34.5891	0.2707	13.9052	16.5285	2.5996
460a0ee4-9f91-46ce-9121-fdbb30efa9cc	0.4502	0.902	0.0659	0	0.3221	0.9571	1.8178	47.1923	0.4006	1.2341	0.5952	2.3905	0	3.9687	49.1939	15.158	4.4368	3.2251	3.6541	2.4559	5.2181	3.3579	18.2848	11.4509	1.8233	3.5918	9.6861	16.5304	0.5804	35.3144	2.2604	1.6792	0.1791	0.8495	8.0598	5.0075	18.9058	0.5573	61.5874	5.9613	0.7512	5.6155	6.1354	2.9575	16.0988	0.5495	29.018	4.4587	2.4188
6becdda4-cd0f-45ff-b993-f577338ed0c7	1.0988	0.3212	1.6636	0	1.0694	6.3137	0.9731	20.7636	0	0.3239	2.2285	17.0946	3.5823	5.5515	9.9535	40.438	0.3424	3.3638	4.9328	14.6054	2.66	8.186	9.6718	7.1258	4.8142	6.2201	32.971	137.751	0.3377	25.2631	54.274	35.3616	0.4388	6.3563	13.3375	0.4959	18.5506	44.9117	47.4562	22.0567	0.5662	8.1571	3.8317	1.3584	53.9409	0.4347	14.2625	22.7659	0.909
1514f0e4-4726-47e1-af26-140ff7fb0490	0.6621	2.6571	4.0715	0.0144	1.6873	2.5996	2.2491	18.1596	0.4459	1.2407	1.6455	5.4133	7.8409	5.1233	9.677	24.0052	0.9088	4.0169	0.1185	11.7394	1.6095	6.3295	6.6045	6.6843	1.9532	3.6	12.2347	100.229	0.9117	38.3099	49.9934	15.6817	0.1501	2.72	11.2748	2.6924	9.8194	20.1682	47.3145	12.2357	1.0457	6.7641	2.6725	0.3304	23.231	0.2532	18.6553	10.006	1.2159
93c623c5-5ca3-44d8-8871-955a94778cc2	0.5639	3.2328	8.2345	0.2754	3.84	13.9883	2.1961	31.5361	1.6989	0.8703	3.4721	8.2372	4.2775	20.3813	14.9279	21.2247	16.218	5.886	0.3232	18.0018	3.309	18.9119	11.6612	7.3607	3.5409	7.3737	20.5452	79.4089	1.5121	49.5264	24.0675	19.407	0.2292	12.8738	19.9105	10.2135	9.5472	35.1678	63.3104	17.8458	1.9095	14.1501	3.1044	1.0814	40.285	0.6405	28.1868	25.518	5.3969
3ee8fe71-e80d-47ba-8c22-3ad14d6f896e	0.7179	0.9604	3.2435	0.1393	3.2695	4.3798	1.0229	24.5375	0	1.0763	2.6088	12.0608	0	9.6988	14.2293	23.7512	4.2414	3.65	0.4361	11.8941	1.2752	5.8684	10.1926	10.7198	4.935	4.0199	14.2964	122.867	1.4093	46.8156	101.656	29.6988	0.0828	14.8362	13.9664	5.7552	23.1962	25.721	101.688	24.6752	0.4209	6.5798	4.9084	0.3419	36.9904	0.4765	43.1986	31.0373	0.7627
[truncated: 951 more columns]
